# Supplementary material for: RUVBL1 and RUVBL2 as novel druggable DNA Damage Response regulators in the N-Myc regulatory network in neuroblastoma
Source: Research Square preprint supplement (doi:10.21203/rs.3.rs-3206227/v1), 2023-11-20
Supplement: Supplementary file 1 [file 1c5bd7556455d040dea3b725.xlsx]

## Sheet: legend
Tab names indicate different cell lines (SK-N-AS or CLB-BA), and time points (0hrs, 24hrs, 48hrs, and /2hrs).
Differential expression determined relative to control (i.e 0 hrs) of respective cell lines. Each Cell line was treated with 250 nM CB-6644 for the indicated time points.

## Sheet: CLB-BA_24hrs_vs_0hrs
baseMean	log2FoldChange	lfcSE	stat	pvalue	padj	HGNC	ENSG
25.1219	-0.121646	0.556922	-0.218426	0.827097	0.980275	A1BG	ENSG00000121410.11
0.541326	1.73106	4.3678	0.396322	0.691867	0.902409	A1CF	ENSG00000148584.14
0.242433	0	4.40736	0	1	1	A2M	ENSG00000175899.14
0						A2ML1	ENSG00000166535.19
0						A3GALT2	ENSG00000184389.9
0.725529	-1.08895	3.50931	-0.310303	0.756331	0.942873	A4GALT	ENSG00000128274.16
0.281046	0	4.40736	0	1	1	A4GNT	ENSG00000118017.3
530.987	-1.03464	0.104779	-9.8745	5.37007e-23	1.23398e-20	AAAS	ENSG00000094914.12
408.2	-0.518644	0.0942302	-5.50401	3.71253e-08	9.16337e-07	AACS	ENSG00000081760.16
0						AADAC	ENSG00000114771.13
0						AADACL2	ENSG00000197953.5
0						AADACL3	ENSG00000188984.11
0						AADACL4	ENSG00000204518.2
223.419	-0.347199	0.141623	-2.45157	0.0142233	0.0615854	AADAT	ENSG00000109576.13
480.05	0.134953	0.108727	1.24121	0.214528	0.449991	AAGAB	ENSG00000103591.12
900.841	-0.0153049	0.0844835	-0.181158	0.856244	0.98949	AAK1	ENSG00000115977.18
41.9149	0.986068	0.33876	2.91082	0.00360487	0.0205426	AAMDC	ENSG00000087884.14
617.302	0.118824	0.0877216	1.35456	0.175559	0.392415	AAMP	ENSG00000127837.9
1.69022	3.59711	2.1913	1.64154	0.100686	0.266022	AANAT	ENSG00000129673.9
510.068	-0.0662989	0.102791	-0.644989	0.518934	0.779094	AAR2	ENSG00000131043.11
0.183709	0	4.40736	0	1	1	AARD	ENSG00000205002.3
1551.55	-0.426461	0.0596432	-7.15021	8.66475e-13	5.27483e-11	AARS	ENSG00000090861.15
592.387	0.307566	0.0939276	3.2745	0.00105848	0.0073423	AARS2	ENSG00000124608.4
140.698	-0.127553	0.192434	-0.662842	0.507432	0.7694	AARSD1	ENSG00000266967.6
111.076	-0.0415254	0.21826	-0.190257	0.849108	0.985412	AASDH	ENSG00000157426.13
1174.09	-0.466013	0.0796268	-5.85247	4.84339e-09	1.43412e-07	AASDHPPT	ENSG00000149313.10
2.11186	1.74348	2.1145	0.824536	0.409635	0.675003	AASS	ENSG00000008311.14
0.0801831	0.834622	4.40736	0.18937	0.849803	0.985412	AATF	ENSG00000275700.4
422.377	-0.00765216	0.115967	-0.0659858	0.947389	1	AATK	ENSG00000181409.12
454.482	0.288125	0.112767	2.55504	0.0106174	0.0490996	ABAT	ENSG00000183044.11
124.261	-0.478327	0.201186	-2.37753	0.0174288	0.072079	ABCA1	ENSG00000165029.15
4.10428	4.63555	1.64372	2.82016	0.00480002	0.0259742	ABCA10	ENSG00000154263.17
25.4721	-1.14348	0.475858	-2.40299	0.0162615	0.0683604	ABCA12	ENSG00000144452.14
0.412009	0	4.40736	0	1	1	ABCA13	ENSG00000179869.14
1386.33	0.280783	0.057943	4.84585	1.26074e-06	2.17359e-05	ABCA2	ENSG00000107331.16
2507.03	-0.0946661	0.053718	-1.76228	0.0780223	0.222623	ABCA3	ENSG00000167972.13
0.166925	0	4.40736	0	1	1	ABCA4	ENSG00000198691.12
212.506	0.0286154	0.16093	0.177813	0.85887	0.991336	ABCA5	ENSG00000154265.15
0.740556	0	3.90976	0	1	1	ABCA6	ENSG00000154262.12
350.057	1.4083	0.14464	9.73657	2.10548e-22	4.46115e-20	ABCA7	ENSG00000064687.12
1.6248	0	2.62492	0	1	1	ABCA8	ENSG00000141338.13
1.29882	2.70171	2.52161	1.07142	0.28398	0.539112	ABCA9	ENSG00000154258.16
50.8184	1.31659	0.478962	2.74884	0.00598062	0.0308387	ABCB1	ENSG00000085563.14
280.873	0.000944307	0.121654	0.00776226	0.993807	1	ABCB10	ENSG00000135776.4
0						ABCB11	ENSG00000073734.9
17.2858	0.345579	0.549824	0.628528	0.529658	0.787324	ABCB4	ENSG00000005471.17
0						ABCB5	ENSG00000004846.16
346.826	0.391862	0.121258	3.23163	0.00123088	0.00834376	ABCB6	ENSG00000115657.13
269.161	0.0363724	0.147703	0.246254	0.805486	0.966226	ABCB7	ENSG00000131269.16
467.31	-0.47466	0.102537	-4.62914	3.67179e-06	5.59862e-05	ABCB8	ENSG00000197150.12
263.569	0.157513	0.147732	1.06621	0.286331	0.542439	ABCB9	ENSG00000150967.17
135.502	-0.0289531	0.371864	-0.0778594	0.93794	1	ABCC1	ENSG00000103222.18
246.263	0.4264	0.149399	2.85411	0.00431578	0.0237557	ABCC10	ENSG00000124574.14
6.59134	-0.534578	1.04386	-0.512116	0.60857	0.844515	ABCC11	ENSG00000121270.15
0.0747448	0	4.40736	0	1	1	ABCC12	ENSG00000140798.16
19.5872	2.37185	0.573367	4.1367	3.52333e-05	0.000405955	ABCC2	ENSG00000023839.11
0.753352	0.834605	3.44769	0.242077	0.808721	0.968672	ABCC3	ENSG00000108846.15
1194.62	-0.454266	0.0775783	-5.85559	4.75331e-09	1.41257e-07	ABCC4	ENSG00000125257.14
1229.2	-0.128536	0.0829313	-1.54991	0.121163	0.303353	ABCC5	ENSG00000114770.16
7.13195	3.0195	1.08874	2.77338	0.00554766	0.0289704	ABCC6	ENSG00000091262.15
174.069	0.199233	0.184285	1.08112	0.279645	0.53399	ABCC8	ENSG00000006071.13
0.155556	0	4.40736	0	1	1	ABCC9	ENSG00000069431.11
88.5703	0.394361	0.256629	1.5367	0.124367	0.308702	ABCD1	ENSG00000101986.11
18.9026	0.730613	0.572068	1.27714	0.201551	0.43131	ABCD2	ENSG00000173208.3
499.001	-0.0244131	0.115468	-0.211427	0.832554	0.983078	ABCD3	ENSG00000117528.12
666.291	0.273171	0.0886718	3.0807	0.00206516	0.0129489	ABCD4	ENSG00000119688.20
1434.44	-0.296911	0.0547085	-5.42714	5.72656e-08	1.3425e-06	ABCE1	ENSG00000164163.10
2.1616	-4.37798	2.22231	-1.97002	0.0488364	0.157619	ABCF1	ENSG00000204574.12
302.977	-0.301519	0.126908	-2.37589	0.0175067	0.0722179	ABCF2	ENSG00000033050.8
396.36	0.170177	0.110923	1.5342	0.124981	0.309653	ABCF3	ENSG00000161204.11
157.23	-0.309409	0.174838	-1.7697	0.0767777	0.220494	ABCG1	ENSG00000160179.18
34.2587	-0.173963	0.431452	-0.403204	0.686798	0.900753	ABCG2	ENSG00000118777.11
72.5203	0.0803206	0.322637	0.24895	0.803399	0.965971	ABCG4	ENSG00000172350.9
0.0861957	-1.08891	4.40736	-0.247065	0.804858	0.965971	ABCG5	ENSG00000138075.12
4.77324	3.29738	1.46669	2.24818	0.024565	0.0935741	ABCG8	ENSG00000143921.7
18.1968	1.56669	0.68597	2.28391	0.0223771	0.0869267	ABHD1	ENSG00000143994.13
288.49	0.20323	0.116072	1.75091	0.0799622	0.226294	ABHD10	ENSG00000144827.8
102.811	0.472085	0.240661	1.96162	0.0498073	0.15971	ABHD11	ENSG00000106077.18
433.513	0.152914	0.125751	1.21601	0.223982	0.462506	ABHD12	ENSG00000100997.18
0.783925	-1.08894	3.24882	-0.335179	0.73749	0.930057	ABHD12B	ENSG00000131969.14
253.56	0.163953	0.145383	1.12774	0.259431	0.508524	ABHD13	ENSG00000139826.5
87.2532	0.18049	0.19988	0.902992	0.36653	0.633729	ABHD14A	ENSG00000248487.8
2.65594	-1.88986	1.61917	-1.16718	0.243139	0.488428	ABHD14A-ACY1	ENSG00000114786.16
103.792	-0.401476	0.196378	-2.04441	0.0409134	0.137999	ABHD14B	ENSG00000114779.19
109.164	0.828893	0.261791	3.16624	0.00154421	0.0100896	ABHD15	ENSG00000168792.4
0						ABHD16A	ENSG00000204427.11
90.9623	-0.168642	0.296215	-0.569325	0.569136	0.817885	ABHD16B	ENSG00000183260.7
1255.68	0.187446	0.0673024	2.78513	0.00535066	0.0281509	ABHD17A	ENSG00000129968.15
392.222	0.0261691	0.112635	0.232334	0.816278	0.973436	ABHD17B	ENSG00000107362.13
192.463	-0.660227	0.158554	-4.16404	3.12663e-05	0.000365408	ABHD17C	ENSG00000136379.11
115.557	0.609479	0.214267	2.84448	0.00444836	0.024354	ABHD18	ENSG00000164074.15
1246.25	0.127756	0.0682033	1.87317	0.0610447	0.185707	ABHD2	ENSG00000140526.17
207.14	0.837093	0.174145	4.80687	1.53309e-06	2.56274e-05	ABHD3	ENSG00000158201.9
57.9793	0.592731	0.304562	1.94617	0.0516339	0.163892	ABHD4	ENSG00000100439.10
397.504	0.311382	0.123724	2.51675	0.0118444	0.0535295	ABHD5	ENSG00000011198.9
219.205	0.393656	0.137319	2.86673	0.00414741	0.023031	ABHD6	ENSG00000163686.14
310.239	0.270021	0.137814	1.95932	0.0500758	0.160199	ABHD8	ENSG00000127220.5
293.378	0.187505	0.124484	1.50626	0.132	0.322528	ABI1	ENSG00000136754.17
2179.54	-0.158907	0.0497663	-3.19306	0.00140773	0.00934385	ABI2	ENSG00000138443.15
0.323244	0	4.40736	0	1	1	ABI3	ENSG00000108798.8
2.86871	0.455177	1.81554	0.250712	0.802037	0.965971	ABI3BP	ENSG00000154175.16
1406.95	-0.210317	0.058563	-3.5913	0.00032903	0.00275855	ABL1	ENSG00000097007.17
720.558	-0.132244	0.0919178	-1.43872	0.15023	0.353475	ABL2	ENSG00000143322.19
1667.75	-0.127164	0.0553507	-2.29742	0.0215947	0.0844593	ABLIM1	ENSG00000099204.19
29.955	1.19493	0.430651	2.7747	0.00552525	0.0289017	ABLIM2	ENSG00000163995.19
18.5917	0.298244	0.738178	0.404027	0.686193	0.900724	ABLIM3	ENSG00000173210.19
0.161622	0	4.40736	0	1	1	ABO	ENSG00000175164.14
55.9595	0.636282	0.375123	1.6962	0.0898487	0.245749	ABR	ENSG00000159842.15
0.298979	0	4.40736	0	1	1	ABRA	ENSG00000174429.3
11.473	-0.451807	0.652286	-0.692652	0.488528	0.751564	ABRACL	ENSG00000146386.7
128.452	-0.167344	0.181393	-0.922552	0.356241	0.62241	ABRAXAS1	ENSG00000163322.13
362.441	0.00118755	0.112276	0.0105771	0.991561	1	ABRAXAS2	ENSG00000165660.7
202.039	0.0136798	0.154594	0.0884887	0.929488	1	ABT1	ENSG00000146109.4
98.6674	0.0674268	0.271309	0.248524	0.803729	0.965971	ABTB1	ENSG00000114626.17
53.0073	0.846815	0.428754	1.97506	0.0482613	0.156227	ABTB2	ENSG00000166016.5
0.263113	0	4.40736	0	1	1	AC000120.2	ENSG00000285772.1
0						AC000120.3	ENSG00000285953.1
73.2706	0.583982	0.232756	2.50899	0.0121077	0.054508	AC001226.2	ENSG00000283208.1
0						AC002094.3	ENSG00000273171.1
0						AC002310.4	ENSG00000260869.1
0.526269	2.31603	4.32792	0.535136	0.592556	0.83292	AC002310.5	ENSG00000261459.1
0						AC002985.1	ENSG00000268193.5
0						AC002996.1	ENSG00000257767.2
0						AC003002.1	ENSG00000268133.1
0						AC003002.2	ENSG00000268533.1
2.29499	3.34462	2.24611	1.48908	0.136468	0.330385	AC003002.3	ENSG00000269533.5
0.14397	0.834613	4.40736	0.189368	0.849804	0.985412	AC003005.1	ENSG00000268107.5
1.17505	1.70405	2.91712	0.584154	0.559117	0.81106	AC003006.1	ENSG00000269026.2
0						AC003688.1	ENSG00000262302.1
0.90483	0	3.575	0	1	1	AC004076.1	ENSG00000268163.1
0						AC004080.3	ENSG00000257184.3
0						AC004233.2	ENSG00000270168.2
0.605194	0	4.40736	0	1	1	AC004593.3	ENSG00000285162.1
0.449067	-2.54947	4.32925	-0.588895	0.555932	0.808636	AC004687.2	ENSG00000285897.1
0.166925	0	4.40736	0	1	1	AC004691.2	ENSG00000250424.4
2.00926	-0.887672	1.8072	-0.491188	0.623294	0.857134	AC004754.1	ENSG00000269881.1
0						AC004805.1	ENSG00000266076.1
0						AC004832.3	ENSG00000249590.7
3.67044	-1.71074	1.38332	-1.23669	0.216203	0.452283	AC004922.1	ENSG00000284292.1
0.654583	2.73107	4.16403	0.65587	0.511907	0.77274	AC004997.1	ENSG00000248751.6
0.878444	2.69782	3.67159	0.734782	0.462473	0.727603	AC005020.2	ENSG00000272647.3
2.58401	-2.64861	2.00814	-1.31894	0.18719	0.409824	AC005041.1	ENSG00000159239.13
0						AC005154.5	ENSG00000281039.1
0						AC005258.1	ENSG00000273734.1
0.573543	-1.08894	4.06283	-0.268025	0.78868	0.9637	AC005324.3	ENSG00000251537.4
0						AC005324.4	ENSG00000255104.8
1.64935	0	4.40736	0	1	1	AC005520.1	ENSG00000258653.3
0						AC005551.1	ENSG00000284638.1
31.7655	1.14791	0.38759	2.96167	0.00305979	0.0179377	AC005670.2	ENSG00000262633.2
0						AC005697.1	ENSG00000266202.1
0						AC005702.1	ENSG00000267318.1
54.2373	-0.617394	0.273225	-2.25965	0.0238427	0.0914634	AC005726.1	ENSG00000258472.8
0						AC005779.2	ENSG00000267545.1
0.161622	0	4.40736	0	1	1	AC005832.4	ENSG00000272921.1
0.260227	0.80006	4.36529	0.183277	0.85458	0.988758	AC005833.1	ENSG00000255639.3
0						AC005837.2	ENSG00000267168.1
1.28144	2.31601	2.8014	0.826733	0.408389	0.674037	AC005943.1	ENSG00000267059.2
5.46438	-0.746964	2.22049	-0.336396	0.736572	0.929546	AC006030.1	ENSG00000264324.1
0.756903	0	3.64182	0	1	1	AC006059.2	ENSG00000280571.2
0.647613	0	3.90502	0	1	1	AC006064.6	ENSG00000285238.2
6.34954	-0.857907	1.08392	-0.791483	0.428662	0.694777	AC006254.1	ENSG00000243696.4
0.367419	0	4.40736	0	1	1	AC006486.1	ENSG00000268643.1
0						AC006518.7	ENSG00000284826.1
0						AC006538.2	ENSG00000267001.1
0						AC006978.2	ENSG00000281593.1
1.69404	2.33737	2.20471	1.06017	0.289068	0.545787	AC007040.2	ENSG00000258881.6
0.993174	-3.69473	3.47001	-1.06476	0.286984	0.54311	AC007192.1	ENSG00000268173.3
25.8785	0.229923	0.440097	0.522438	0.601365	0.838499	AC007240.1	ENSG00000284681.2
0						AC007326.4	ENSG00000283809.1
0.0918546	0	4.40736	0	1	1	AC007375.1	ENSG00000259164.1
0						AC007731.5	ENSG00000277971.1
0						AC007846.2	ENSG00000285471.1
1.66627	1.75267	2.43427	0.719998	0.471526	0.735732	AC007906.2	ENSG00000277639.2
0						AC007998.2	ENSG00000267140.1
0						AC008012.1	ENSG00000285901.1
0						AC008073.3	ENSG00000276087.2
0						AC008162.2	ENSG00000278646.1
0.247736	0	4.40736	0	1	1	AC008397.1	ENSG00000284797.1
4.73177	-0.127156	1.92204	-0.0661568	0.947253	1	AC008397.2	ENSG00000285188.1
0						AC008403.1	ENSG00000268465.1
0						AC008481.3	ENSG00000267477.1
0						AC008537.1	ENSG00000268797.1
0						AC008575.1	ENSG00000258864.1
0.0801831	0.834622	4.40736	0.18937	0.849803	0.985412	AC008581.2	ENSG00000285000.1
0.32754	-1.08893	4.40736	-0.247071	0.804853	0.965971	AC008676.3	ENSG00000285868.1
0						AC008687.1	ENSG00000267335.2
0						AC008687.4	ENSG00000268655.2
0						AC008687.8	ENSG00000283663.1
0						AC008695.1	ENSG00000273217.1
0.878646	0	3.14455	0	1	1	AC008750.8	ENSG00000269403.1
0						AC008758.1	ENSG00000196826.7
1.4865	-0.981825	2.18795	-0.448743	0.653617	0.878255	AC008758.4	ENSG00000268744.1
0						AC008758.5	ENSG00000268870.1
0						AC008758.6	ENSG00000269755.1
0.0952398	0	4.40736	0	1	1	AC008763.2	ENSG00000268400.5
0						AC008763.3	ENSG00000269711.1
0						AC008764.1	ENSG00000141979.4
0.080811	0	4.40736	0	1	1	AC008764.4	ENSG00000268790.5
0						AC008770.1	ENSG00000257355.1
0.826189	3.54274	3.37735	1.04897	0.294192	0.552076	AC008770.2	ENSG00000267179.1
1.70433	0.422416	2.04996	0.206061	0.836743	0.985412	AC008878.1	ENSG00000267952.1
0						AC008878.2	ENSG00000268614.1
0						AC008878.3	ENSG00000268861.6
0						AC008982.1	ENSG00000268083.5
0						AC009086.2	ENSG00000277669.1
0.766178	-2.09335	3.34486	-0.625842	0.531419	0.787883	AC009119.2	ENSG00000260300.5
0						AC009133.6	ENSG00000280893.1
0						AC009163.2	ENSG00000260092.1
0						AC009163.4	ENSG00000261717.5
2.12791	-1.08895	2.38701	-0.456199	0.648247	0.875199	AC009336.2	ENSG00000278500.1
0						AC009477.2	ENSG00000284479.1
3.57435	0.750524	1.43919	0.52149	0.602025	0.838774	AC009690.1	ENSG00000260729.1
0.646488	0	4.40736	0	1	1	AC009690.3	ENSG00000273025.1
0.948422	2.31602	2.9238	0.792126	0.428287	0.694652	AC009879.2	ENSG00000285655.1
3.15792	1.71555	1.98553	0.864028	0.387572	0.654851	AC009879.3	ENSG00000285791.1
1.10434	2.70092	2.65989	1.01543	0.309903	0.571207	AC010132.3	ENSG00000256646.7
0.668003	-2.00348	3.2591	-0.614735	0.53873	0.79348	AC010197.2	ENSG00000285854.1
0						AC010255.3	ENSG00000250803.6
0						AC010319.2	ENSG00000269035.1
0						AC010323.1	ENSG00000167774.2
0						AC010325.1	ENSG00000261341.6
2.95228	3.93376	3.19138	1.23262	0.217717	0.45442	AC010326.2	ENSG00000269476.1
0						AC010327.1	ENSG00000267110.1
0						AC010422.3	ENSG00000269242.1
0						AC010422.5	ENSG00000269590.1
9.36102	0.414056	0.790284	0.523934	0.600325	0.837547	AC010422.6	ENSG00000269693.1
118.064	-0.215973	0.230718	-0.936093	0.349225	0.615293	AC010422.8	ENSG00000285589.1
0						AC010463.1	ENSG00000269307.1
0						AC010487.3	ENSG00000283088.1
1.88133	-0.727896	2.10886	-0.345161	0.729973	0.925729	AC010522.1	ENSG00000268750.6
0.161622	0	4.40736	0	1	1	AC010531.1	ENSG00000131152.4
0.417313	0	4.40736	0	1	1	AC010542.3	ENSG00000260851.6
0.55701	0	4.40736	0	1	1	AC010547.4	ENSG00000261611.6
0						AC010615.4	ENSG00000269237.1
1.43295	-0.383889	2.51355	-0.152728	0.878613	1	AC010616.1	ENSG00000268041.2
0						AC010616.2	ENSG00000285505.1
0						AC010619.1	ENSG00000269469.1
0						AC010646.1	ENSG00000269095.1
0.312426	0.834595	4.40736	0.189364	0.849807	0.985412	AC011005.1	ENSG00000230626.4
0.417313	0	4.40736	0	1	1	AC011195.2	ENSG00000266826.2
0						AC011330.3	ENSG00000284772.1
31.077	-0.217309	0.389626	-0.557737	0.577024	0.822718	AC011448.1	ENSG00000258674.5
0						AC011452.1	ENSG00000269179.1
0						AC011455.2	ENSG00000269547.1
0						AC011462.1	ENSG00000255730.5
0						AC011473.4	ENSG00000269741.5
0						AC011479.1	ENSG00000267748.4
0						AC011498.4	ENSG00000267385.1
0						AC011499.1	ENSG00000267157.1
12.8185	-0.215368	0.671234	-0.320854	0.748321	0.937881	AC011511.1	ENSG00000167807.15
0.0657782	0	4.40736	0	1	1	AC011511.4	ENSG00000267303.1
0						AC011530.1	ENSG00000268434.5
0						AC011604.2	ENSG00000257046.5
0.156384	1.69887	4.37049	0.388714	0.697488	0.904075	AC012184.2	ENSG00000260537.2
0.530363	-2.69295	4.32154	-0.623145	0.533189	0.788741	AC012213.5	ENSG00000285982.1
0.272079	0	4.40736	0	1	1	AC012254.2	ENSG00000267228.7
0.0781918	0.834622	4.40736	0.18937	0.849803	0.985412	AC012309.1	ENSG00000267360.6
0						AC012476.1	ENSG00000285396.1
0						AC012531.2	ENSG00000273049.1
7.031	3.36093	1.44588	2.32448	0.0200998	0.0800999	AC012651.1	ENSG00000258461.5
4.13634	1.29899	1.30589	0.994721	0.319872	0.582966	AC013394.1	ENSG00000279765.3
0.166925	0	4.40736	0	1	1	AC013470.2	ENSG00000226690.8
1.66025	0.779458	2.34445	0.33247	0.739535	0.931196	AC013489.1	ENSG00000173867.10
0.939143	0.415339	3.27233	0.126924	0.899	1	AC013717.1	ENSG00000285542.1
0						AC015688.4	ENSG00000266728.5
509.84	-0.520221	0.09827	-5.2938	1.19803e-07	2.62022e-06	AC015802.6	ENSG00000284526.1
3.35968	2.90691	1.51716	1.91602	0.0553624	0.172571	AC015813.2	ENSG00000266086.2
2.8765	0.0291527	1.55973	0.0186908	0.985088	1	AC017083.3	ENSG00000273398.6
0.316089	0	4.40736	0	1	1	AC018362.3	ENSG00000285942.1
0						AC018512.1	ENSG00000262560.1
2.15301	1.73089	2.20807	0.78389	0.433105	0.6983	AC018523.2	ENSG00000256206.2
0						AC018554.3	ENSG00000278499.2
0						AC018709.1	ENSG00000272297.2
0						AC018755.2	ENSG00000268500.5
0						AC019117.2	ENSG00000283321.1
0						AC020636.2	ENSG00000260234.5
0						AC020907.6	ENSG00000285526.1
0						AC020909.1	ENSG00000142539.9
7.96089	1.03319	1.15486	0.894641	0.370979	0.638545	AC020915.1	ENSG00000267216.1
0.903599	1.75809	3.14612	0.558812	0.57629	0.822266	AC020915.5	ENSG00000283515.1
0.161654	0.834613	4.40736	0.189368	0.849804	0.985412	AC020922.1	ENSG00000267706.3
0						AC021072.1	ENSG00000283536.2
0.268671	0.834603	4.40736	0.189366	0.849806	0.985412	AC021097.2	ENSG00000285292.1
0						AC021097.3	ENSG00000285480.1
0						AC021660.3	ENSG00000285635.1
0						AC022167.5	ENSG00000283516.1
0						AC022335.1	ENSG00000257062.6
0						AC022384.1	ENSG00000272410.5
34.912	0.732281	0.371751	1.96982	0.0488596	0.157638	AC022400.6	ENSG00000272916.5
0						AC022414.1	ENSG00000284762.1
0						AC022506.1	ENSG00000285133.1
0						AC022826.2	ENSG00000258677.2
5.76657	0.11922	0.92266	0.129214	0.897188	1	AC023055.1	ENSG00000257390.5
9.26186	1.03613	0.708689	1.46204	0.143729	0.343029	AC023509.3	ENSG00000267281.2
0						AC024592.3	ENSG00000267740.5
1.04286	0.64253	2.92984	0.219306	0.826412	0.980005	AC025165.3	ENSG00000257921.5
0						AC025263.2	ENSG00000258052.1
130.673	0.334651	0.194784	1.71807	0.0857843	0.237941	AC025283.2	ENSG00000262621.5
13.9155	0.162961	0.627616	0.259651	0.795133	0.965971	AC025283.3	ENSG00000285329.1
0						AC025287.4	ENSG00000284484.1
0						AC026316.5	ENSG00000285218.1
0						AC026398.1	ENSG00000281938.1
0						AC026464.1	ENSG00000259900.5
0						AC026464.3	ENSG00000260371.1
0.879777	4.18697	3.45707	1.21113	0.225845	0.464765	AC026464.4	ENSG00000260914.3
0						AC026464.6	ENSG00000272617.3
0						AC026786.1	ENSG00000256825.4
2.43375	-0.119302	1.71954	-0.0693801	0.944687	1	AC026954.2	ENSG00000261915.6
0.901307	4.06602	3.18121	1.27813	0.201202	0.430845	AC027644.4	ENSG00000284461.2
1.20154	2.7015	2.55506	1.05731	0.290368	0.547294	AC027796.3	ENSG00000262304.2
0						AC034102.2	ENSG00000257411.1
0.323244	0	4.40736	0	1	1	AC036214.3	ENSG00000276418.5
1.15989	0	2.68601	0	1	1	AC037459.1	ENSG00000248235.6
34.3883	-0.231325	0.382218	-0.605218	0.545034	0.799516	AC040162.1	ENSG00000261884.2
0						AC046185.1	ENSG00000125695.12
0						AC048338.1	ENSG00000256861.1
0						AC055811.2	ENSG00000264187.1
0						AC058822.1	ENSG00000282278.1
0.325872	1.76179	4.36529	0.403591	0.686514	0.900724	AC067752.1	ENSG00000285551.1
0						AC067968.1	ENSG00000267022.1
0						AC068234.1	ENSG00000259753.1
1.40531	2.73772	2.32392	1.17806	0.238771	0.482182	AC068533.4	ENSG00000249319.2
0.191217	-1.08891	4.40736	-0.247068	0.804856	0.965971	AC068547.1	ENSG00000283228.1
2.19791	-1.13223	2.15998	-0.524185	0.60015	0.837376	AC068580.4	ENSG00000250644.3
0						AC068631.2	ENSG00000283149.1
0						AC068775.1	ENSG00000255641.1
0.343296	0.834597	4.40736	0.189364	0.849807	0.985412	AC068790.8	ENSG00000274874.1
256.132	-0.561048	0.142971	-3.9242	8.70171e-05	0.000889525	AC068831.7	ENSG00000284946.1
5.6279	-0.815884	1.01278	-0.805592	0.420478	0.686455	AC068896.1	ENSG00000258539.1
3.11438	-2.50274	1.55228	-1.6123	0.106897	0.277965	AC068946.1	ENSG00000280537.2
26.6198	0.40888	0.409446	0.998617	0.31798	0.581076	AC068946.2	ENSG00000284820.1
1.34945	0	2.96289	0	1	1	AC068987.5	ENSG00000284730.1
0.215019	0	4.40736	0	1	1	AC069257.3	ENSG00000272741.1
0.0747448	0	4.40736	0	1	1	AC069368.1	ENSG00000249240.2
0						AC069444.2	ENSG00000285585.1
0.547216	3.07231	3.7432	0.820771	0.411777	0.677743	AC069503.2	ENSG00000256950.2
0						AC073082.1	ENSG00000279956.1
0						AC073111.3	ENSG00000284041.1
76.4299	-0.386991	0.274256	-1.41106	0.158228	0.365495	AC073111.5	ENSG00000284691.1
0.328501	2.76361	4.3065	0.641729	0.521049	0.780258	AC073283.3	ENSG00000273269.3
21.2284	-0.0848242	0.559836	-0.151516	0.879569	1	AC073508.2	ENSG00000264058.2
0						AC073610.2	ENSG00000255863.2
1.63778	4.05302	2.45401	1.65159	0.0986172	0.262427	AC073610.3	ENSG00000272822.1
0						AC073612.1	ENSG00000258064.1
2.17127	-1.08895	2.40444	-0.452892	0.650626	0.876691	AC073896.1	ENSG00000144785.8
41.6634	-0.45453	0.390939	-1.16266	0.244967	0.490745	AC074143.1	ENSG00000265690.7
0						AC078927.1	ENSG00000228144.2
2.24694	-0.609967	1.82918	-0.333464	0.738784	0.930652	AC079447.1	ENSG00000241962.9
0.46737	-3.11025	4.30296	-0.722816	0.469793	0.733456	AC079594.2	ENSG00000248710.1
0						AC083800.1	ENSG00000251012.2
0						AC084121.11	ENSG00000285913.1
0						AC084121.12	ENSG00000285937.1
0						AC084121.13	ENSG00000285950.1
0						AC084121.5	ENSG00000285607.1
0						AC084121.6	ENSG00000285620.1
0						AC084121.7	ENSG00000285657.1
0						AC084121.8	ENSG00000285720.1
0						AC084121.9	ENSG00000285814.1
0						AC084337.2	ENSG00000283977.1
9.41946	0.199876	0.988585	0.202184	0.839773	0.985412	AC087289.3	ENSG00000267426.5
0						AC087498.1	ENSG00000180042.5
4.55868	2.00604	1.27861	1.56892	0.116667	0.295885	AC087632.1	ENSG00000259316.11
0.0834625	0	4.40736	0	1	1	AC087721.2	ENSG00000285920.1
0						AC090004.1	ENSG00000268279.4
0						AC090227.1	ENSG00000266997.2
4.38008	1.6942	1.21178	1.39811	0.16208	0.371291	AC090360.1	ENSG00000267127.7
2.19421	0.632498	1.88842	0.334935	0.737674	0.930139	AC090517.4	ENSG00000285253.1
0						AC090527.2	ENSG00000260170.1
1.82983	0.626029	2.1902	0.285832	0.775007	0.955652	AC091057.6	ENSG00000284906.1
2.44267	3.52338	1.80546	1.95152	0.0509957	0.162404	AC091167.2	ENSG00000261147.1
0						AC091167.6	ENSG00000275674.1
3.06512	3.70133	2.00866	1.84268	0.0653754	0.195384	AC091167.7	ENSG00000284626.1
2.3782	2.15363	1.83286	1.17501	0.239991	0.484098	AC091551.1	ENSG00000267699.2
2.41973	-2.00958	1.93633	-1.03783	0.299348	0.558986	AC091959.3	ENSG00000275740.1
0						AC092017.3	ENSG00000283952.1
0						AC092042.3	ENSG00000273291.5
0.298979	0	4.40736	0	1	1	AC092073.1	ENSG00000266953.6
0						AC092111.3	ENSG00000284393.1
0						AC092143.1	ENSG00000198211.8
0.0810746	-1.08891	4.40736	-0.247065	0.804858	0.965971	AC092329.3	ENSG00000283201.1
0						AC092442.1	ENSG00000284684.1
0.0781918	0.834622	4.40736	0.18937	0.849803	0.985412	AC092587.1	ENSG00000273155.1
3.91902	0.788916	1.26143	0.625412	0.531701	0.787964	AC092647.5	ENSG00000249773.3
8.45456	0.0486019	0.815472	0.0595997	0.952474	1	AC092718.3	ENSG00000260643.2
3.53306	0.554827	1.25556	0.441896	0.658564	0.882021	AC092718.8	ENSG00000284512.1
23.8728	-0.96122	0.447574	-2.14763	0.0317435	0.113811	AC092835.1	ENSG00000233757.6
0.351474	0.834598	4.40736	0.189365	0.849807	0.985412	AC093155.3	ENSG00000267561.2
0						AC093227.2	ENSG00000267552.6
421.166	-0.0465867	0.108089	-0.431002	0.666467	0.887118	AC093323.1	ENSG00000170846.17
0						AC093423.3	ENSG00000271949.1
39.4361	0.778583	0.347143	2.24283	0.0249077	0.0945486	AC093512.2	ENSG00000285043.1
0						AC093525.1	ENSG00000259784.1
0.62741	-1.08895	3.67419	-0.296378	0.766941	0.950087	AC093525.2	ENSG00000260272.1
0.16425	1.76181	4.36529	0.403595	0.686511	0.900724	AC093668.1	ENSG00000270249.1
1.02574	2.33466	2.80792	0.831456	0.405716	0.671883	AC093668.2	ENSG00000272949.1
0.0747448	0	4.40736	0	1	1	AC093668.3	ENSG00000284981.1
0.391159	0	4.40736	0	1	1	AC093827.5	ENSG00000285458.1
0						AC093899.2	ENSG00000251569.1
0.92551	0	3.38743	0	1	1	AC096582.3	ENSG00000283247.2
0.0861957	-1.08891	4.40736	-0.247065	0.804858	0.965971	AC096887.1	ENSG00000272305.5
0						AC097104.1	ENSG00000285528.1
1.20538	-3.98087	2.56818	-1.55008	0.121123	0.30332	AC097625.1	ENSG00000285602.1
1.20483	1.71812	2.75552	0.623518	0.532944	0.788741	AC097634.4	ENSG00000285708.1
0.319474	0	4.40736	0	1	1	AC097636.1	ENSG00000285749.1
0						AC097637.1	ENSG00000173366.11
10.2816	2.68448	1.14328	2.34806	0.0188715	0.0763758	AC098484.3	ENSG00000283580.3
0						AC098582.1	ENSG00000285385.1
9.32629	0.277286	1.46802	0.188884	0.850184	0.985769	AC098588.1	ENSG00000285713.1
3.4233	-0.51769	1.30176	-0.397686	0.690862	0.902409	AC098650.1	ENSG00000283563.1
0						AC098850.3	ENSG00000266302.6
1.64119	-2.89993	2.3524	-1.23276	0.217667	0.454413	AC099489.1	ENSG00000188897.9
0						AC099811.2	ENSG00000267261.5
0						AC099850.2	ENSG00000265303.1
0						AC100868.1	ENSG00000258417.3
0.871187	2.32548	2.87794	0.808037	0.419069	0.685135	AC104109.3	ENSG00000272772.1
0						AC104151.1	ENSG00000261833.2
0						AC104304.1	ENSG00000283877.1
0.400916	3.05302	4.29575	0.710706	0.477267	0.74017	AC104389.4	ENSG00000239920.2
0						AC104389.5	ENSG00000284931.1
32.417	-0.165635	0.395669	-0.41862	0.675494	0.893036	AC104452.1	ENSG00000283189.2
0.0747448	0	4.40736	0	1	1	AC104472.3	ENSG00000284952.1
0.685098	1.35427	3.50822	0.386027	0.699476	0.905071	AC104532.1	ENSG00000267314.1
0						AC104581.2	ENSG00000262730.1
0						AC104662.2	ENSG00000281028.1
2.70808	0.245782	1.52736	0.16092	0.872156	1	AC105052.1	ENSG00000205236.6
1.61065	-0.618651	2.07997	-0.297432	0.766137	0.949306	AC105052.3	ENSG00000267645.5
0						AC106774.4	ENSG00000268799.3
9.42969	-0.606091	0.784038	-0.773038	0.4395	0.705336	AC106886.5	ENSG00000282034.1
69.0031	0.709274	0.292191	2.42743	0.0152061	0.0647477	AC107871.1	ENSG00000260007.3
0.666679	0	4.40736	0	1	1	AC107959.5	ENSG00000284956.1
0						AC108488.2	ENSG00000255767.1
0						AC108941.2	ENSG00000284695.1
0						AC109583.3	ENSG00000284672.1
0						AC110275.1	ENSG00000254673.1
9.53912	-0.459934	0.752261	-0.611403	0.540933	0.795719	AC112128.1	ENSG00000285943.1
0.881572	-3.20402	3.65813	-0.875864	0.381104	0.648683	AC112229.3	ENSG00000257207.5
0						AC112504.2	ENSG00000285558.1
0						AC113348.1	ENSG00000285891.1
0.245084	0	4.40736	0	1	1	AC113348.2	ENSG00000285978.1
0.0657782	0	4.40736	0	1	1	AC113554.1	ENSG00000264813.6
0.241805	0.834605	4.40736	0.189366	0.849806	0.985412	AC114490.2	ENSG00000271741.1
4.79549	2.77141	1.5389	1.8009	0.0717186	0.209693	AC114490.3	ENSG00000284773.1
5.88441	2.87221	1.51432	1.89669	0.0578683	0.178323	AC115220.1	ENSG00000241149.3
5.36274	-0.87031	1.01314	-0.859021	0.390329	0.657806	AC116366.3	ENSG00000283782.2
1.26878	1.70554	2.71491	0.628212	0.529865	0.787461	AC117378.1	ENSG00000285625.1
0						AC117457.1	ENSG00000275163.1
0						AC118470.1	ENSG00000239395.2
388.764	0.163291	0.114425	1.42706	0.153562	0.3587	AC118549.1	ENSG00000036549.12
8.00365	0.148623	0.93166	0.159525	0.873255	1	AC118553.2	ENSG00000283761.1
0						AC119396.1	ENSG00000263264.1
0.0952398	0	4.40736	0	1	1	AC119674.2	ENSG00000284686.1
0						AC119676.1	ENSG00000284895.1
0						AC120057.2	ENSG00000262526.2
2.05799	5.04785	2.16225	2.33454	0.0195676	0.0784581	AC120114.4	ENSG00000281348.1
0						AC124312.1	ENSG00000214265.11
0						AC126283.2	ENSG00000285330.1
38.2998	0.678763	0.403659	1.68153	0.0926608	0.251123	AC126755.2	ENSG00000233024.7
0						AC127029.3	ENSG00000285947.1
0						AC129492.3	ENSG00000263620.1
0						AC131097.2	ENSG00000216921.8
0.0952398	0	4.40736	0	1	1	AC131160.1	ENSG00000283765.1
0						AC134669.1	ENSG00000265118.5
0						AC134684.11	ENSG00000285975.1
0						AC134684.8	ENSG00000285687.1
0						AC134684.9	ENSG00000285765.1
0						AC134980.3	ENSG00000285472.1
0.421376	0.799935	4.30701	0.185729	0.852658	0.987444	AC135050.2	ENSG00000255439.6
0						AC135068.1	ENSG00000182974.3
0						AC135068.3	ENSG00000279408.3
0.666679	0	4.40736	0	1	1	AC135178.2	ENSG00000263809.1
0						AC136428.1	ENSG00000259680.5
0.329838	2.34794	4.32617	0.54273	0.587316	0.830299	AC137834.1	ENSG00000258830.1
0.19048	0	4.40736	0	1	1	AC138647.1	ENSG00000226490.2
0						AC138696.1	ENSG00000264668.1
4.10506	-0.126738	1.47515	-0.0859151	0.931534	1	AC138811.2	ENSG00000260342.2
1.02459	-1.90216	2.98561	-0.637108	0.524055	0.782962	AC138894.1	ENSG00000261832.6
0						AC139491.7	ENSG00000285476.1
0						AC139530.2	ENSG00000262660.1
0						AC140504.1	ENSG00000261130.5
0						AC142391.1	ENSG00000279686.1
0						AC144573.1	ENSG00000285880.1
0						AC187653.1	ENSG00000248767.2
0						AC233723.1	ENSG00000262165.2
13.0395	0.689141	0.718457	0.959195	0.33746	0.602239	AC233992.2	ENSG00000271698.1
0						AC235565.2	ENSG00000284800.1
0						AC239799.1	ENSG00000213240.8
0						AC243547.3	ENSG00000280778.1
0						AC243756.1	ENSG00000270339.3
0						AC243967.1	ENSG00000267881.1
17.7981	1.22508	0.53194	2.30304	0.0212765	0.0836649	AC244197.3	ENSG00000241489.7
0.98025	0.493553	3.34797	0.147419	0.882802	1	AC244517.10	ENSG00000279983.1
0						AC245033.1	ENSG00000260836.2
0						AC245748.1	ENSG00000267173.1
0						AC253536.7	ENSG00000285762.1
169.628	0.107878	0.161982	0.665983	0.505422	0.767431	ACAA1	ENSG00000060971.17
909.645	0.295421	0.0806068	3.66496	0.000247375	0.00216172	ACAA2	ENSG00000167315.17
62.6673	0.452519	0.507276	0.892058	0.372362	0.639581	ACACA	ENSG00000278540.4
88.4139	0.337528	0.222878	1.51441	0.129923	0.318798	ACACB	ENSG00000076555.15
269.589	0.278534	0.137272	2.02907	0.0424509	0.142011	ACAD10	ENSG00000111271.14
71.5403	0.709767	0.264769	2.6807	0.00734679	0.0363331	ACAD11	ENSG00000240303.7
361.349	0.286687	0.106022	2.70405	0.00685008	0.0344192	ACAD8	ENSG00000151498.11
502.453	0.270681	0.0961994	2.81375	0.0048968	0.026332	ACAD9	ENSG00000177646.18
2.97931	-2.36928	1.57788	-1.50156	0.13321	0.32428	ACADL	ENSG00000115361.7
533.397	-0.101342	0.0999038	-1.0144	0.310394	0.571888	ACADM	ENSG00000117054.13
50.386	0.388277	0.30096	1.29013	0.197005	0.425263	ACADS	ENSG00000122971.8
238.259	0.232323	0.155537	1.49369	0.135258	0.328138	ACADSB	ENSG00000196177.12
1332.09	-0.00596354	0.0616953	-0.0966612	0.922995	1	ACADVL	ENSG00000072778.19
2.44491	-2.53726	1.74642	-1.45284	0.146268	0.346503	ACAN	ENSG00000157766.16
0.866572	0	3.42227	0	1	1	ACAP1	ENSG00000072818.11
706.54	0.379058	0.0978103	3.87544	0.000106432	0.00105934	ACAP2	ENSG00000114331.13
844.829	-0.180043	0.091524	-1.96717	0.0491641	0.158332	ACAP3	ENSG00000131584.18
396.902	-0.570293	0.112556	-5.06675	4.04664e-07	7.9067e-06	ACAT1	ENSG00000075239.13
331.043	-0.420838	0.118737	-3.54429	0.000393672	0.0032162	ACAT2	ENSG00000120437.8
502.517	0.361374	0.0928344	3.89267	9.91456e-05	0.000998494	ACBD3	ENSG00000182827.8
79.4033	0.521734	0.236337	2.20758	0.0272733	0.101523	ACBD4	ENSG00000181513.14
543.226	0.141766	0.106052	1.33676	0.181302	0.401404	ACBD5	ENSG00000107897.18
656.817	-0.154826	0.0970394	-1.59549	0.110602	0.284788	ACBD6	ENSG00000230124.7
108.632	0.709709	0.224976	3.1546	0.00160717	0.0104424	ACBD7	ENSG00000176244.6
89.3207	0.643573	0.28604	2.24994	0.0244525	0.0932327	ACCS	ENSG00000110455.13
0						ACCSL	ENSG00000205126.2
414.302	0.266563	0.108251	2.46244	0.0137994	0.060149	ACD	ENSG00000102977.14
2182.86	-0.216398	0.0624615	-3.4645	0.000531217	0.00413296	ACE	ENSG00000159640.15
0.0959768	-1.08891	4.40736	-0.247065	0.804858	0.965971	ACE2	ENSG00000130234.10
0						ACER1	ENSG00000167769.4
9.80746	2.02978	0.756824	2.68198	0.00731884	0.0362168	ACER2	ENSG00000177076.5
266.984	0.501172	0.12881	3.89077	9.99251e-05	0.00100429	ACER3	ENSG00000078124.11
166.571	0.650169	0.231243	2.81163	0.00492914	0.026471	ACHE	ENSG00000087085.14
1704.84	-0.207617	0.0574521	-3.61374	0.000301817	0.00255932	ACIN1	ENSG00000100813.14
36.0741	0.329471	0.373704	0.881636	0.377974	0.645352	ACKR1	ENSG00000213088.10
0.633888	-0.127163	3.71029	-0.0342732	0.972659	1	ACKR2	ENSG00000144648.15
0.730476	-1.96639	3.74612	-0.524915	0.599642	0.837098	ACKR3	ENSG00000144476.5
1.89915	-1.23833	1.95374	-0.633825	0.526195	0.784723	ACKR4	ENSG00000129048.6
4098.62	-0.365527	0.0564285	-6.47771	9.3125e-11	3.90574e-09	ACLY	ENSG00000131473.16
1.15447	-3.49659	3.00058	-1.16531	0.243895	0.489345	ACMSD	ENSG00000153086.13
251.167	0.222008	0.121002	1.83475	0.0665433	0.197932	ACO1	ENSG00000122729.18
995.405	0.0810524	0.0744088	1.08929	0.276028	0.530061	ACO2	ENSG00000100412.15
0						ACOD1	ENSG00000102794.9
47.9411	0.701393	0.305805	2.29359	0.0218139	0.0851218	ACOT1	ENSG00000184227.7
175.845	0.319892	0.182289	1.75486	0.0792827	0.224839	ACOT11	ENSG00000162390.17
1.20665	0	3.38282	0	1	1	ACOT12	ENSG00000172497.8
220.028	0.165446	0.153331	1.07901	0.280583	0.535092	ACOT13	ENSG00000112304.10
364.844	0.726623	0.119566	6.07716	1.22328e-09	4.2194e-08	ACOT2	ENSG00000119673.14
19.2176	-0.168759	0.48626	-0.347055	0.72855	0.924571	ACOT4	ENSG00000177465.4
0.270663	0.834603	4.40736	0.189366	0.849806	0.985412	ACOT6	ENSG00000205669.3
544.769	0.0609525	0.109764	0.555304	0.578687	0.823812	ACOT7	ENSG00000097021.19
184.233	0.0316881	0.147545	0.214769	0.829947	0.9817	ACOT8	ENSG00000101473.16
233.332	-0.235349	0.133279	-1.76584	0.0774223	0.221682	ACOT9	ENSG00000123130.16
597.738	0.0532469	0.0959328	0.555044	0.578865	0.823812	ACOX1	ENSG00000161533.11
0.309856	1.73107	4.3678	0.396325	0.691865	0.902409	ACOX2	ENSG00000168306.12
106.22	0.00527154	0.214584	0.0245664	0.980401	1	ACOX3	ENSG00000087008.15
1.25957	2.28878	2.50621	0.913243	0.361115	0.628034	ACOXL	ENSG00000153093.18
1271.24	0.017467	0.067518	0.258701	0.795866	0.965971	ACP1	ENSG00000143727.15
346.299	0.425252	0.223603	1.90181	0.0571955	0.176762	ACP2	ENSG00000134575.9
0						ACP4	ENSG00000142513.5
1.03633	2.69827	3.44063	0.784237	0.432901	0.698248	ACP5	ENSG00000102575.11
102.79	-0.188043	0.212081	-0.886655	0.375264	0.64225	ACP6	ENSG00000162836.11
0						ACP7	ENSG00000183760.10
0						ACPP	ENSG00000014257.15
0						ACR	ENSG00000100312.10
11.2065	-0.93315	0.662932	-1.40761	0.159247	0.366908	ACRBP	ENSG00000111644.7
3.72024	0.49866	1.22605	0.406722	0.684212	0.900236	ACRV1	ENSG00000134940.13
98.6367	0.513306	0.207432	2.47458	0.0133394	0.0586294	ACSBG1	ENSG00000103740.9
0.249841	-0.127137	4.40736	-0.0288465	0.976987	1	ACSBG2	ENSG00000130377.13
71.5569	1.42435	0.279004	5.1051	3.30618e-07	6.61033e-06	ACSF2	ENSG00000167107.12
123.133	0.0594371	0.218556	0.271954	0.785657	0.961719	ACSF3	ENSG00000176715.16
928.596	-0.286376	0.0816947	-3.50544	0.00045585	0.00363995	ACSL1	ENSG00000151726.13
1958.26	-0.123477	0.0601136	-2.05407	0.0399692	0.135549	ACSL3	ENSG00000123983.13
814.139	-0.173836	0.0740361	-2.34799	0.0188751	0.0763758	ACSL4	ENSG00000068366.19
1.06292	3.31048	2.56269	1.2918	0.196426	0.42435	ACSL5	ENSG00000197142.10
32.1686	0.399629	0.441578	0.905001	0.365465	0.632565	ACSL6	ENSG00000164398.12
0						ACSM1	ENSG00000166743.9
0						ACSM2A	ENSG00000183747.11
0						ACSM2B	ENSG00000066813.14
27.7265	0.0889542	0.411084	0.216389	0.828684	0.98106	ACSM3	ENSG00000005187.11
0.0781918	0.834622	4.40736	0.18937	0.849803	0.985412	ACSM4	ENSG00000215009.5
0						ACSM5	ENSG00000183549.10
0						ACSM6	ENSG00000173124.14
80.7428	-0.339321	0.244972	-1.38514	0.166008	0.377903	ACSS1	ENSG00000154930.14
201.058	-0.209284	0.150029	-1.39495	0.16303	0.373048	ACSS2	ENSG00000131069.19
35.9671	-0.853438	0.437717	-1.94975	0.0512059	0.162882	ACSS3	ENSG00000111058.7
5.20785	0.0458963	1.08579	0.0422699	0.966284	1	ACTA1	ENSG00000143632.14
66.3579	0.745468	0.388747	1.91762	0.0551593	0.172201	ACTA2	ENSG00000107796.13
18571.8	-0.575959	0.0452556	-12.7268	4.19688e-37	3.804e-34	ACTB	ENSG00000075624.14
0						ACTBL2	ENSG00000169067.3
6.30331	-1.83596	1.12641	-1.62992	0.103118	0.270914	ACTC1	ENSG00000159251.7
19674.9	-0.0602485	0.0517006	-1.16534	0.243883	0.489345	ACTG1	ENSG00000184009.11
0						ACTG2	ENSG00000163017.13
8.00674	-0.137749	0.953461	-0.144473	0.885127	1	ACTL10	ENSG00000182584.4
707.216	-0.0735357	0.0791308	-0.929294	0.352737	0.618349	ACTL6A	ENSG00000136518.16
408.562	-0.0565422	0.118759	-0.47611	0.633996	0.865135	ACTL6B	ENSG00000077080.9
0						ACTL7A	ENSG00000187003.6
0.312154	2.34794	4.32617	0.54273	0.587316	0.830299	ACTL7B	ENSG00000148156.7
4.34755	0.266658	1.16347	0.229193	0.818719	0.97485	ACTL8	ENSG00000117148.7
0						ACTL9	ENSG00000181786.4
1002.16	-0.0523179	0.0929917	-0.562608	0.573702	0.821048	ACTN1	ENSG00000072110.13
56.115	-0.0301215	0.276918	-0.108774	0.913382	1	ACTN2	ENSG00000077522.12
0.394669	0	4.40736	0	1	1	ACTN3	ENSG00000248746.5
1235.03	0.281922	0.0692066	4.07363	4.62852e-05	0.000517576	ACTN4	ENSG00000130402.11
364.756	-0.0457612	0.133022	-0.344012	0.730838	0.925994	ACTR10	ENSG00000131966.13
1657.99	-0.177679	0.0605529	-2.93427	0.00334335	0.0193281	ACTR1A	ENSG00000138107.12
911.082	0.160869	0.0769857	2.08959	0.0366543	0.12694	ACTR1B	ENSG00000115073.7
2487.78	-0.05332	0.0552358	-0.965316	0.334387	0.598988	ACTR2	ENSG00000138071.13
963.542	-0.260525	0.089101	-2.92393	0.00345644	0.0198773	ACTR3	ENSG00000115091.11
399.583	0.457772	0.124312	3.68244	0.00023101	0.00203946	ACTR3B	ENSG00000133627.17
3.13176	-0.372262	1.44618	-0.25741	0.796862	0.965971	ACTR3C	ENSG00000106526.10
191.018	-0.1627	0.162559	-1.00087	0.31689	0.579618	ACTR5	ENSG00000101442.9
163.244	-0.795797	0.160419	-4.96074	7.0224e-07	1.28586e-05	ACTR6	ENSG00000075089.9
338.356	0.149757	0.121699	1.23055	0.218491	0.455666	ACTR8	ENSG00000113812.13
0						ACTRT1	ENSG00000123165.8
0						ACTRT2	ENSG00000169717.6
16.6334	2.65903	0.714076	3.72373	0.000196299	0.00178718	ACTRT3	ENSG00000184378.2
186.885	0.102908	0.160302	0.64196	0.520899	0.780258	ACVR1	ENSG00000115170.13
1435.22	-0.14429	0.0658973	-2.18962	0.0285515	0.105111	ACVR1B	ENSG00000135503.12
2.11257	2.75621	2.16596	1.27251	0.203192	0.433724	ACVR1C	ENSG00000123612.15
225.802	-0.157846	0.148736	-1.06125	0.288578	0.545177	ACVR2A	ENSG00000121989.14
999.482	-1.05418	0.0807483	-13.0551	5.94441e-39	8.81663e-36	ACVR2B	ENSG00000114739.13
36.3181	-1.40162	0.366979	-3.81936	0.0001338	0.00128536	ACVRL1	ENSG00000139567.12
30.6448	-0.711281	0.402457	-1.76735	0.0771699	0.221231	ACY1	ENSG00000243989.8
0.534344	0	4.40736	0	1	1	ACY3	ENSG00000132744.7
53.3972	0.442601	0.338528	1.30743	0.191068	0.416067	ACYP1	ENSG00000119640.8
26.9331	0.935528	0.506964	1.84536	0.0649857	0.194469	ACYP2	ENSG00000170634.12
3.51237	-0.277221	1.66554	-0.166446	0.867806	0.997482	AD000671.1	ENSG00000188223.9
0.503247	2.69695	4.30929	0.625845	0.531417	0.787883	AD000671.2	ENSG00000267120.3
35.4077	-0.264486	0.341176	-0.775219	0.43821	0.704263	ADA	ENSG00000196839.12
1.20791	1.36614	2.41275	0.566218	0.571245	0.819465	ADA2	ENSG00000093072.16
0						ADAD1	ENSG00000164113.10
0.415098	0	4.40736	0	1	1	ADAD2	ENSG00000140955.10
127.797	0.245167	0.227495	1.07768	0.281177	0.53566	ADAL	ENSG00000168803.15
1026.39	0.147562	0.0853154	1.7296	0.0837015	0.234074	ADAM10	ENSG00000137845.14
284.564	0.103627	0.120326	0.861215	0.38912	0.656446	ADAM11	ENSG00000073670.13
2253.07	0.0635196	0.0502748	1.26345	0.206428	0.438697	ADAM12	ENSG00000148848.14
650.511	0.0845767	0.0786984	1.07469	0.282512	0.537352	ADAM15	ENSG00000143537.13
460.603	0.114464	0.107486	1.06491	0.286915	0.543104	ADAM17	ENSG00000151694.13
0						ADAM18	ENSG00000168619.15
183.229	0.158939	0.174215	0.912315	0.361603	0.628416	ADAM19	ENSG00000135074.15
0						ADAM2	ENSG00000104755.14
1.77671	0	4.40736	0	1	1	ADAM20	ENSG00000134007.3
4.25151	-1.34632	1.41695	-0.950153	0.342034	0.607183	ADAM21	ENSG00000139985.6
865.357	0.215307	0.0861674	2.4987	0.0124649	0.0557317	ADAM22	ENSG00000008277.14
1160.15	0.155953	0.0719665	2.16703	0.0302328	0.109879	ADAM23	ENSG00000114948.12
0						ADAM28	ENSG00000042980.12
12.518	0.587377	0.828716	0.708779	0.478461	0.74137	ADAM29	ENSG00000168594.15
0						ADAM30	ENSG00000134249.6
10.4837	1.05039	0.727342	1.44414	0.148699	0.350885	ADAM32	ENSG00000197140.14
0.568328	0	4.40736	0	1	1	ADAM33	ENSG00000149451.17
0						ADAM7	ENSG00000069206.15
14.8598	-0.288537	0.604883	-0.477013	0.633353	0.864627	ADAM8	ENSG00000151651.15
173.565	0.160154	0.19432	0.824173	0.409841	0.675206	ADAM9	ENSG00000168615.11
0						ADAMDEC1	ENSG00000134028.14
267.762	-0.0765182	0.13211	-0.579201	0.562454	0.813513	ADAMTS1	ENSG00000154734.14
95.1553	-0.107093	0.218602	-0.489898	0.624206	0.8581	ADAMTS10	ENSG00000142303.13
1.13781	-1.52107	2.7326	-0.556636	0.577776	0.823124	ADAMTS12	ENSG00000151388.10
339.857	0.378405	0.138935	2.7236	0.00645742	0.0328304	ADAMTS13	ENSG00000160323.18
31.9141	-0.821406	0.391485	-2.09818	0.0358894	0.125061	ADAMTS14	ENSG00000138316.10
12.9369	-0.1356	1.52786	-0.0887514	0.929279	1	ADAMTS15	ENSG00000166106.3
2.66222	0.762586	1.42876	0.533741	0.593521	0.83333	ADAMTS16	ENSG00000145536.15
527.738	-0.355039	0.104628	-3.39336	0.00069042	0.00514112	ADAMTS17	ENSG00000140470.13
0.0834625	0	4.40736	0	1	1	ADAMTS18	ENSG00000140873.15
230.757	-0.427839	0.157254	-2.72068	0.00651483	0.0330399	ADAMTS19	ENSG00000145808.9
3167.68	-0.30808	0.0579641	-5.31501	1.06649e-07	2.3609e-06	ADAMTS2	ENSG00000087116.15
170.031	-0.00999765	0.203622	-0.049099	0.96084	1	ADAMTS20	ENSG00000173157.16
63.2386	0.0213079	0.29789	0.0715296	0.942976	1	ADAMTS3	ENSG00000156140.9
8.04351	0.737652	0.824616	0.894539	0.371033	0.638545	ADAMTS4	ENSG00000158859.9
210.126	0.18505	0.173364	1.0674	0.285789	0.541819	ADAMTS5	ENSG00000154736.5
43.0656	-0.379212	0.306849	-1.23583	0.216523	0.452692	ADAMTS6	ENSG00000049192.14
464.156	-0.495448	0.0972447	-5.09485	3.49012e-07	6.94407e-06	ADAMTS7	ENSG00000136378.14
3.24431	0.233767	1.56673	0.149207	0.88139	1	ADAMTS8	ENSG00000134917.9
1034.44	0.045344	0.0910712	0.497897	0.618557	0.85292	ADAMTS9	ENSG00000163638.13
1.95884	-2.29999	2.26964	-1.01337	0.310883	0.572338	ADAMTSL1	ENSG00000178031.16
310.121	-0.363792	0.152082	-2.39208	0.0167533	0.069852	ADAMTSL2	ENSG00000197859.9
5.32434	2.23292	1.61087	1.38616	0.165698	0.377353	ADAMTSL3	ENSG00000156218.12
12.826	1.50339	0.872306	1.72346	0.0848051	0.236068	ADAMTSL4	ENSG00000143382.14
0.0810746	-1.08891	4.40736	-0.247065	0.804858	0.965971	ADAMTSL5	ENSG00000185761.10
43.4928	-0.195356	0.294503	-0.663341	0.507112	0.769132	ADAP1	ENSG00000105963.14
0.912252	0	3.43498	0	1	1	ADAP2	ENSG00000184060.10
2626.36	-0.138369	0.0529775	-2.61184	0.0090057	0.0428361	ADAR	ENSG00000160710.16
196.026	0.514456	0.153717	3.34676	0.000817608	0.00591542	ADARB1	ENSG00000197381.15
15.0078	0.00684362	0.585738	0.0116838	0.990678	1	ADARB2	ENSG00000185736.15
260.334	0.10349	0.129225	0.800847	0.42322	0.689312	ADAT1	ENSG00000065457.10
75.9788	-0.18012	0.282582	-0.637408	0.523859	0.782814	ADAT2	ENSG00000189007.15
93.4211	-0.538055	0.228392	-2.35583	0.0184811	0.0752313	ADAT3	ENSG00000213638.5
74.0074	0.358033	0.285081	1.2559	0.209153	0.442414	ADCK1	ENSG00000063761.15
279.877	0.32702	0.127025	2.57445	0.01004	0.046838	ADCK2	ENSG00000133597.10
140.53	0.976492	0.196357	4.97304	6.59094e-07	1.22194e-05	ADCK5	ENSG00000173137.11
1504.53	-0.240989	0.0718628	-3.35346	0.000798092	0.0057959	ADCY1	ENSG00000164742.15
2.055	2.73049	1.96063	1.39266	0.163723	0.374058	ADCY10	ENSG00000143199.17
0.292574	0	4.40736	0	1	1	ADCY2	ENSG00000078295.16
695.9	0.0400027	0.0835951	0.478529	0.632273	0.863876	ADCY3	ENSG00000138031.14
0.568387	2.3264	3.71754	0.62579	0.531453	0.787883	ADCY4	ENSG00000129467.13
211.768	-0.266622	0.159404	-1.67261	0.0944041	0.254501	ADCY5	ENSG00000173175.14
1219.46	0.436907	0.0787521	5.54788	2.89159e-08	7.30283e-07	ADCY6	ENSG00000174233.11
524.743	0.0549269	0.0986611	0.556723	0.577717	0.823111	ADCY7	ENSG00000121281.12
3.43811	0	2.07661	0	1	1	ADCY8	ENSG00000155897.9
420.438	-0.285541	0.109362	-2.61096	0.00902893	0.0429158	ADCY9	ENSG00000162104.9
1688.95	-0.293721	0.0691692	-4.24641	2.17223e-05	0.000264478	ADCYAP1	ENSG00000141433.12
894.565	-0.169897	0.0774742	-2.19295	0.0283113	0.10436	ADCYAP1R1	ENSG00000078549.14
2118.17	0.0092193	0.0530252	0.173866	0.861971	0.992733	ADD1	ENSG00000087274.16
2141.7	-0.043774	0.055696	-0.785945	0.4319	0.697526	ADD2	ENSG00000075340.22
1351.68	0.169719	0.0633787	2.67785	0.00740969	0.0365555	ADD3	ENSG00000148700.14
0.439253	0	4.40736	0	1	1	ADGB	ENSG00000118492.16
0.6677	0	4.40736	0	1	1	ADGRA1	ENSG00000197177.15
307.764	0.099554	0.12597	0.790301	0.429352	0.695135	ADGRA2	ENSG00000020181.17
1276.21	-0.268319	0.0648724	-4.13611	3.53248e-05	0.000406721	ADGRA3	ENSG00000152990.13
308.498	-0.00977601	0.12987	-0.0752754	0.939996	1	ADGRB1	ENSG00000181790.11
749.169	-0.177355	0.0823433	-2.15385	0.0312519	0.112605	ADGRB2	ENSG00000121753.12
312.038	-0.0933105	0.118485	-0.787532	0.43097	0.69694	ADGRB3	ENSG00000135298.13
14.0193	-0.254806	0.729845	-0.349123	0.726997	0.923319	ADGRD1	ENSG00000111452.12
3.2177	1.80609	1.60143	1.1278	0.259403	0.508524	ADGRD2	ENSG00000180264.11
0						ADGRE1	ENSG00000174837.14
0						ADGRE2	ENSG00000127507.17
0						ADGRE3	ENSG00000131355.14
9.15879	3.36167	1.39646	2.40729	0.0160714	0.0676485	ADGRE5	ENSG00000123146.19
0						ADGRF1	ENSG00000153292.15
0						ADGRF2	ENSG00000164393.8
15.1616	0.834576	0.734278	1.13659	0.255708	0.503793	ADGRF3	ENSG00000173567.14
0						ADGRF4	ENSG00000153294.11
0						ADGRF5	ENSG00000069122.18
120.366	-0.459897	0.229381	-2.00495	0.0449685	0.148005	ADGRG1	ENSG00000205336.11
2.95599	1.09298	1.85848	0.588105	0.556462	0.809007	ADGRG2	ENSG00000173698.17
0.0821252	0.834622	4.40736	0.18937	0.849803	0.985412	ADGRG3	ENSG00000182885.16
0.0834625	0	4.40736	0	1	1	ADGRG4	ENSG00000156920.10
0.478037	0	4.40736	0	1	1	ADGRG5	ENSG00000159618.15
77.4212	-0.379579	0.24764	-1.53279	0.125329	0.310342	ADGRG6	ENSG00000112414.14
0						ADGRG7	ENSG00000144820.7
1874.97	-0.24909	0.0600056	-4.15112	3.30857e-05	0.000385292	ADGRL1	ENSG00000072071.16
955.025	-0.22553	0.0748947	-3.01129	0.0026014	0.015699	ADGRL2	ENSG00000117114.19
86.5019	-0.36582	0.276008	-1.3254	0.185039	0.407041	ADGRL3	ENSG00000150471.16
0						ADGRL4	ENSG00000162618.13
2.66374	-0.80696	1.90661	-0.423242	0.672119	0.890862	ADGRV1	ENSG00000164199.17
0						ADH1A	ENSG00000187758.7
0.459273	0	4.40736	0	1	1	ADH1B	ENSG00000196616.13
0						ADH1C	ENSG00000248144.5
0						ADH4	ENSG00000198099.8
956.928	-0.0916702	0.0655514	-1.39845	0.161979	0.371164	ADH5	ENSG00000197894.10
0						ADH6	ENSG00000172955.17
0						ADH7	ENSG00000196344.11
18.5115	-0.14076	0.669515	-0.210241	0.833479	0.983454	ADHFE1	ENSG00000147576.16
150.266	-0.0690394	0.215229	-0.320772	0.748383	0.937881	ADI1	ENSG00000182551.13
0						ADIG	ENSG00000182035.11
1.60648	2.73105	2.48287	1.09996	0.271352	0.523607	ADIPOQ	ENSG00000181092.9
555.083	0.3043	0.0918	3.31482	0.000917026	0.00648965	ADIPOR1	ENSG00000159346.12
778.868	0.262895	0.0900864	2.91825	0.00352001	0.0201435	ADIPOR2	ENSG00000006831.9
0.0834625	0	4.40736	0	1	1	ADIRF	ENSG00000148671.13
402.484	0.00511623	0.111771	0.0457741	0.96349	1	ADK	ENSG00000156110.13
55.3195	0.170721	0.321175	0.53155	0.595037	0.834584	ADM	ENSG00000148926.9
36.0451	0.164921	0.361553	0.456145	0.648286	0.875199	ADM2	ENSG00000128165.8
42.2897	-1.03963	0.323645	-3.21226	0.00131695	0.00881298	ADM5	ENSG00000224420.3
1857.57	-0.673488	0.0641603	-10.497	8.92138e-26	2.74627e-23	ADNP	ENSG00000101126.16
740.008	0.0149463	0.0996277	0.150021	0.880748	1	ADNP2	ENSG00000101544.8
573.279	0.0220725	0.110948	0.198945	0.842306	0.985412	ADO	ENSG00000181915.4
46.4199	-0.14711	0.32313	-0.455267	0.648917	0.875689	ADORA1	ENSG00000163485.16
1.88207	-3.8192	1.92879	-1.9801	0.0476926	0.154748	ADORA2A	ENSG00000128271.21
47.1803	0.361747	0.33537	1.07865	0.280743	0.535272	ADORA2B	ENSG00000170425.3
0						ADORA3	ENSG00000282608.1
530.237	-0.085611	0.0941686	-0.909125	0.363284	0.630396	ADPGK	ENSG00000159322.17
13.288	0.954922	0.725771	1.31573	0.188263	0.411676	ADPRH	ENSG00000144843.11
81.5634	0.262341	0.268467	0.977181	0.32848	0.592691	ADPRHL1	ENSG00000153531.13
112.824	0.452591	0.190432	2.37665	0.0174704	0.0721888	ADPRHL2	ENSG00000116863.10
42.9169	-0.278317	0.390577	-0.712579	0.476106	0.739637	ADPRM	ENSG00000170222.11
0.837784	1.75977	3.55358	0.495209	0.620452	0.854716	ADRA1A	ENSG00000120907.17
6.19144	0.397793	1.30707	0.304339	0.76087	0.945581	ADRA1B	ENSG00000170214.4
1.38999	0	2.7279	0	1	1	ADRA1D	ENSG00000171873.7
94.9387	-0.130839	0.29252	-0.447282	0.654671	0.878875	ADRA2A	ENSG00000150594.6
7.90341	1.22042	1.06299	1.1481	0.250926	0.498158	ADRA2B	ENSG00000274286.1
339.728	-0.392853	0.123327	-3.18545	0.00144529	0.00953106	ADRA2C	ENSG00000184160.7
0.0861957	-1.08891	4.40736	-0.247065	0.804858	0.965971	ADRB1	ENSG00000043591.5
4.25855	-0.587902	1.28924	-0.456007	0.648385	0.875261	ADRB2	ENSG00000169252.5
0						ADRB3	ENSG00000188778.5
821.838	-0.141507	0.0786231	-1.79982	0.0718893	0.210063	ADRM1	ENSG00000130706.12
368.176	-0.322346	0.110277	-2.92305	0.00346623	0.0199058	ADSL	ENSG00000239900.12
637.278	-0.315189	0.0892934	-3.52982	0.00041585	0.00336537	ADSS	ENSG00000035687.9
61.7492	2.80206	0.426359	6.57207	4.96205e-11	2.22406e-09	ADSSL1	ENSG00000185100.10
0						ADTRP	ENSG00000111863.12
1365.84	0.295558	0.0762165	3.87788	0.000105373	0.00105083	AEBP1	ENSG00000106624.10
326.828	-0.134073	0.118402	-1.13236	0.257483	0.50599	AEBP2	ENSG00000139154.14
647.314	-0.303053	0.091653	-3.30653	0.000944606	0.00666288	AEN	ENSG00000181026.14
2145.45	-0.152717	0.0755721	-2.02082	0.0432987	0.14402	AES	ENSG00000104964.14
0						AF241726.2	ENSG00000250349.3
1755.35	-0.314809	0.0623115	-5.05218	4.36784e-07	8.47341e-06	AFAP1	ENSG00000196526.10
86.06	-0.159607	0.235608	-0.677425	0.498137	0.760646	AFAP1L1	ENSG00000157510.13
39.6381	0.985457	0.375512	2.6243	0.00868267	0.0415663	AFAP1L2	ENSG00000169129.14
603.279	-0.16257	0.0909344	-1.78777	0.0738137	0.214129	AFDN	ENSG00000130396.20
771.557	-0.0417052	0.0879432	-0.474229	0.635337	0.865976	AFF1	ENSG00000172493.20
23.4555	-0.0703598	0.580815	-0.12114	0.90358	1	AFF2	ENSG00000155966.13
256.39	0.170394	0.136888	1.24478	0.213214	0.448041	AFF3	ENSG00000144218.18
1967.45	0.0172926	0.0725154	0.238468	0.811518	0.970475	AFF4	ENSG00000072364.12
18.9715	0.0908717	0.515029	0.17644	0.859948	0.991731	AFG1L	ENSG00000135537.16
771.97	-0.0886887	0.0826034	-1.07367	0.282971	0.537886	AFG3L2	ENSG00000141385.9
0						AFM	ENSG00000079557.4
145.689	0.240379	0.174045	1.38113	0.167239	0.379961	AFMID	ENSG00000183077.15
0						AFP	ENSG00000081051.7
367.877	0.159141	0.11172	1.42447	0.154312	0.359569	AFTPH	ENSG00000119844.15
40.406	-0.115669	0.355036	-0.325795	0.74458	0.935231	AGA	ENSG00000038002.8
2897.44	0.0457282	0.058355	0.783621	0.433263	0.698486	AGAP1	ENSG00000157985.18
841.904	0.235573	0.094762	2.48594	0.012921	0.0573024	AGAP2	ENSG00000135439.11
1129.36	-0.0618253	0.0707182	-0.874249	0.381983	0.64951	AGAP3	ENSG00000133612.18
151.773	0.0739725	0.328083	0.225469	0.821614	0.976613	AGAP4	ENSG00000188234.13
6.23726	0.0634723	0.995452	0.0637623	0.94916	1	AGAP5	ENSG00000172650.13
238.988	0.246165	0.151026	1.62995	0.103112	0.270914	AGAP6	ENSG00000204149.10
153.454	0.383559	0.186598	2.05554	0.0398271	0.135145	AGAP9	ENSG00000204172.12
33.201	-0.63339	0.395426	-1.60179	0.109202	0.282112	AGBL1	ENSG00000273540.3
0.0781918	0.834622	4.40736	0.18937	0.849803	0.985412	AGBL2	ENSG00000165923.15
47.1441	1.89804	0.355422	5.34025	9.28174e-08	2.0907e-06	AGBL3	ENSG00000146856.14
20.5681	0.723849	0.566027	1.27882	0.200959	0.430537	AGBL4	ENSG00000186094.16
696.764	0.324955	0.0939163	3.46005	0.000540081	0.00419193	AGBL5	ENSG00000084693.15
0						AGER	ENSG00000204305.13
949.382	-0.211669	0.0696373	-3.03959	0.00236902	0.014503	AGFG1	ENSG00000173744.17
75.8737	-0.125669	0.259753	-0.483803	0.628525	0.861737	AGFG2	ENSG00000106351.12
317.505	0.14459	0.126003	1.14751	0.251171	0.498272	AGGF1	ENSG00000164252.12
138.673	-0.412595	0.232443	-1.77504	0.075892	0.218643	AGK	ENSG00000006530.16
381.723	0.345813	0.1143	3.0255	0.00248225	0.0150774	AGL	ENSG00000162688.16
0.0959768	-1.08891	4.40736	-0.247065	0.804858	0.965971	AGMAT	ENSG00000116771.5
0.624698	1.76165	4.29815	0.409864	0.681906	0.898044	AGMO	ENSG00000187546.13
439.313	0.0602956	0.0989639	0.609269	0.542346	0.797146	AGO1	ENSG00000092847.11
1094.79	-0.504227	0.0661347	-7.62425	2.45458e-14	1.88899e-12	AGO2	ENSG00000123908.11
286.46	0.36167	0.129978	2.78256	0.00539321	0.0283382	AGO3	ENSG00000126070.19
138.137	-0.144186	0.196707	-0.733	0.463559	0.728296	AGO4	ENSG00000134698.10
111.223	0.252514	0.212229	1.18982	0.234118	0.476561	AGPAT1	ENSG00000204310.12
6.02945	1.46821	1.13952	1.28845	0.19759	0.426074	AGPAT2	ENSG00000169692.12
627.217	-0.395417	0.0899263	-4.39713	1.09692e-05	0.000145061	AGPAT3	ENSG00000160216.18
206.038	-0.0842558	0.150912	-0.558309	0.576633	0.822573	AGPAT4	ENSG00000026652.13
1390.49	-0.317197	0.0776922	-4.08274	4.45084e-05	0.000499075	AGPAT5	ENSG00000155189.11
1306.75	-0.0409071	0.0796373	-0.513667	0.607485	0.843761	AGPS	ENSG00000018510.14
0.149241	0	4.40736	0	1	1	AGR2	ENSG00000106541.11
0						AGR3	ENSG00000173467.8
160.286	0.550534	0.20033	2.74814	0.00599351	0.0308857	AGRN	ENSG00000188157.14
0						AGRP	ENSG00000159723.4
0						AGT	ENSG00000135744.7
794.112	0.118888	0.0797624	1.49052	0.136086	0.329757	AGTPBP1	ENSG00000135049.15
3.72454	-0.551109	1.28065	-0.430335	0.666952	0.887547	AGTR1	ENSG00000144891.17
0						AGTR2	ENSG00000180772.6
55.4304	0.526861	0.299155	1.76116	0.0782106	0.222963	AGTRAP	ENSG00000177674.15
0						AGXT	ENSG00000172482.4
0						AGXT2	ENSG00000113492.13
1185.83	0.045063	0.0725115	0.621459	0.534298	0.789732	AHCTF1	ENSG00000153207.15
2171.51	-0.39103	0.0656503	-5.95626	2.58077e-09	8.20766e-08	AHCY	ENSG00000101444.12
1304.38	0.132645	0.0597896	2.21852	0.0265191	0.0995076	AHCYL1	ENSG00000168710.17
259.375	0.414237	0.14193	2.9186	0.00351607	0.020128	AHCYL2	ENSG00000158467.16
120.85	-0.00428079	0.202237	-0.0211672	0.983112	1	AHDC1	ENSG00000126705.14
245.021	-0.0953406	0.134433	-0.709206	0.478197	0.741262	AHI1	ENSG00000135541.20
8982.35	0.200999	0.0629437	3.19331	0.00140653	0.00933966	AHNAK	ENSG00000124942.13
182.009	1.86405	0.185918	10.0262	1.16891e-23	2.93397e-21	AHNAK2	ENSG00000185567.6
140.059	-0.161588	0.250638	-0.644707	0.519117	0.779153	AHR	ENSG00000106546.13
341.169	-0.244324	0.127095	-1.92237	0.0545594	0.170761	AHRR	ENSG00000063438.16
936.411	-0.0811102	0.0794905	-1.02038	0.30755	0.568189	AHSA1	ENSG00000100591.7
3.84484	1.13893	1.43071	0.79606	0.425997	0.692314	AHSG	ENSG00000145192.12
0						AHSP	ENSG00000169877.9
0						AICDA	ENSG00000111732.10
519.555	-0.141254	0.087892	-1.60713	0.108026	0.280241	AIDA	ENSG00000186063.12
0						AIF1	ENSG00000204472.12
33.2416	0.23075	0.399871	0.57706	0.563899	0.814305	AIF1L	ENSG00000126878.12
345.623	-0.11754	0.109459	-1.07383	0.2829	0.537812	AIFM1	ENSG00000156709.13
65.9456	1.09115	0.324251	3.36513	0.000765088	0.00558997	AIFM2	ENSG00000042286.14
15.8019	0.235524	0.61271	0.384396	0.700685	0.905819	AIFM3	ENSG00000183773.15
158.75	0.541333	0.171432	3.15772	0.00159011	0.0103439	AIG1	ENSG00000146416.18
15.8856	0.839335	0.702478	1.19482	0.232157	0.473811	AIM2	ENSG00000163568.14
297.755	-0.497834	0.135236	-3.68123	0.000232111	0.00204476	AIMP1	ENSG00000164022.16
443.671	-0.302704	0.118364	-2.55739	0.010546	0.0488247	AIMP2	ENSG00000106305.9
288.853	-0.827623	0.123111	-6.72258	1.78538e-11	8.74728e-10	AIP	ENSG00000110711.9
0.166925	0	4.40736	0	1	1	AIPL1	ENSG00000129221.15
0						AIRE	ENSG00000160224.16
417.915	-0.296298	0.116471	-2.54397	0.01096	0.0503698	AJAP1	ENSG00000196581.10
72.9457	-0.254968	0.303439	-0.840262	0.400762	0.668214	AJM1	ENSG00000232434.2
13.888	-0.897882	0.680678	-1.3191	0.187136	0.409783	AJUBA	ENSG00000129474.15
101.295	0.347912	0.269937	1.28886	0.197445	0.425819	AK1	ENSG00000106992.18
629.434	0.01914	0.0960884	0.199192	0.842113	0.985412	AK2	ENSG00000004455.16
678.156	0.0443774	0.0760131	0.583813	0.559346	0.811248	AK3	ENSG00000147853.16
577.374	-0.486295	0.0896046	-5.42712	5.72712e-08	1.3425e-06	AK4	ENSG00000162433.14
54.7544	-0.413286	0.295622	-1.39802	0.162107	0.3713	AK5	ENSG00000154027.18
0						AK6	ENSG00000085231.13
60.2827	0.345379	0.30964	1.11542	0.26467	0.5151	AK7	ENSG00000140057.8
1.94158	2.33151	1.96174	1.18849	0.234639	0.477015	AK8	ENSG00000165695.9
36.3188	0.350888	0.405523	0.865274	0.386888	0.654237	AK9	ENSG00000155085.15
1.8108	0.530865	2.1922	0.242161	0.808655	0.968672	AKAIN1	ENSG00000231824.3
1420.94	-0.253022	0.0629995	-4.01626	5.91283e-05	0.000640132	AKAP1	ENSG00000121057.12
248.985	-0.062018	0.161963	-0.382915	0.701783	0.906395	AKAP10	ENSG00000108599.14
1586.77	0.0989905	0.0666757	1.48466	0.137635	0.332325	AKAP11	ENSG00000023516.8
746.642	-0.0814972	0.075891	-1.07387	0.28288	0.537812	AKAP12	ENSG00000131016.16
910.635	-0.388923	0.0843409	-4.61132	4.00121e-06	5.978e-05	AKAP13	ENSG00000170776.21
0.571439	0	4.40736	0	1	1	AKAP14	ENSG00000186471.12
0.0810746	-1.08891	4.40736	-0.247065	0.804858	0.965971	AKAP17A	ENSG00000197976.11
2.78398	-0.105295	1.45257	-0.0724887	0.942213	1	AKAP2	ENSG00000241978.9
6.02434	-0.0966276	1.11558	-0.0866165	0.930976	1	AKAP3	ENSG00000111254.7
27.7329	-0.108399	0.466934	-0.232152	0.81642	0.973493	AKAP4	ENSG00000147081.14
85.9839	0.146887	0.214977	0.683268	0.494438	0.756958	AKAP5	ENSG00000179841.8
317.175	-0.162562	0.120787	-1.34585	0.178349	0.396583	AKAP6	ENSG00000151320.10
30.9743	0.831497	0.391956	2.1214	0.0338879	0.119464	AKAP7	ENSG00000118507.16
367.753	-0.0417758	0.109946	-0.379965	0.703971	0.907713	AKAP8	ENSG00000105127.8
1544.27	0.980769	0.078761	12.4525	1.35601e-35	1.0056e-32	AKAP8L	ENSG00000011243.17
850.709	0.0306485	0.085311	0.359256	0.719403	0.916457	AKAP9	ENSG00000127914.16
147.214	-0.131936	0.189479	-0.696307	0.486237	0.748957	AKIP1	ENSG00000166452.11
443.017	0.00987427	0.106422	0.0927841	0.926075	1	AKIRIN1	ENSG00000174574.15
483.786	-0.0739183	0.0914935	-0.807908	0.419144	0.685135	AKIRIN2	ENSG00000135334.8
70.9812	-0.529364	0.283621	-1.86645	0.061979	0.187803	AKNA	ENSG00000106948.16
2.90909	0	3.84677	0	1	1	AKNAD1	ENSG00000162641.18
641.435	-0.286671	0.0891106	-3.21703	0.00129527	0.00869642	AKR1A1	ENSG00000117448.13
1754.51	-0.00695198	0.0623078	-0.111575	0.911161	1	AKR1B1	ENSG00000085662.13
0.0781918	0.834622	4.40736	0.18937	0.849803	0.985412	AKR1B10	ENSG00000198074.9
0						AKR1B15	ENSG00000227471.8
62.112	0.142662	0.264661	0.53904	0.58986	0.832344	AKR1C1	ENSG00000187134.13
57.7846	0.00795658	0.267881	0.0297019	0.976305	1	AKR1C2	ENSG00000151632.17
40.3106	0.98936	0.397553	2.48863	0.0128237	0.0569924	AKR1C3	ENSG00000196139.13
0						AKR1C4	ENSG00000198610.10
0						AKR1C8P	ENSG00000264006.8
0						AKR1D1	ENSG00000122787.14
46.6041	0.768804	0.345371	2.22602	0.0260126	0.0979059	AKR1E2	ENSG00000165568.17
163.422	0.283895	0.158142	1.79518	0.0726243	0.211772	AKR7A2	ENSG00000053371.12
3.56279	-0.938836	1.04584	-0.897686	0.369353	0.636732	AKR7A3	ENSG00000162482.4
1870.97	-0.0148866	0.0504389	-0.295141	0.767886	0.950752	AKT1	ENSG00000142208.16
500.678	-0.610211	0.104167	-5.85803	4.68396e-09	1.39911e-07	AKT1S1	ENSG00000204673.10
1466.6	-0.214114	0.0583951	-3.66665	0.000245752	0.00215214	AKT2	ENSG00000105221.16
53.3341	-0.600304	0.694203	-0.864739	0.387182	0.654598	AKT3	ENSG00000117020.16
209.985	0.215108	0.172669	1.24579	0.212843	0.447543	AKTIP	ENSG00000166971.16
0						AL020996.2	ENSG00000255054.3
0.739914	-4.06756	3.77897	-1.07636	0.281764	0.536404	AL021546.1	ENSG00000111780.8
0						AL021997.3	ENSG00000276302.1
9.66669	0.0598357	0.897342	0.0666811	0.946836	1	AL022238.4	ENSG00000284431.1
0						AL022312.1	ENSG00000285025.1
0						AL022318.4	ENSG00000284554.2
0						AL024498.2	ENSG00000272162.1
1.02631	0.236103	2.13439	0.110619	0.911919	1	AL031281.2	ENSG00000285721.1
0						AL031315.1	ENSG00000285733.1
1.05595	-0.126484	2.75213	-0.0459587	0.963343	1	AL031708.1	ENSG00000261732.1
10.4274	0.209363	0.730327	0.286671	0.774364	0.955077	AL031777.3	ENSG00000282988.2
0.0918546	0	4.40736	0	1	1	AL031847.2	ENSG00000285629.1
2.03211	0	2.20901	0	1	1	AL032819.3	ENSG00000284395.1
0						AL033529.1	ENSG00000254553.1
0						AL034430.1	ENSG00000285508.1
0						AL034430.2	ENSG00000285723.1
0						AL035078.4	ENSG00000285283.1
0						AL035425.2	ENSG00000260548.1
0						AL035460.1	ENSG00000241690.3
0.344783	-2.96402	4.30888	-0.687888	0.491523	0.75411	AL049557.1	ENSG00000284755.1
0						AL049629.2	ENSG00000284969.1
0.0810746	-1.08891	4.40736	-0.247065	0.804858	0.965971	AL049634.2	ENSG00000260861.6
0.674642	-2.09881	3.77659	-0.555743	0.578386	0.823573	AL049650.1	ENSG00000256566.1
1.36538	-4.62628	2.72762	-1.69609	0.089869	0.245761	AL049697.1	ENSG00000213204.8
0.839908	3.31558	3.13578	1.05734	0.290357	0.547294	AL049779.1	ENSG00000258466.5
0.33385	0	4.40736	0	1	1	AL049839.2	ENSG00000273259.3
0						AL049844.1	ENSG00000257065.1
0						AL049844.3	ENSG00000280148.1
0.243224	-2.46815	4.33397	-0.569489	0.569024	0.817797	AL080251.1	ENSG00000255275.3
136.742	0.168058	0.200045	0.840102	0.400851	0.668222	AL096711.2	ENSG00000255330.9
0						AL096814.1	ENSG00000214732.2
0						AL096870.1	ENSG00000258973.1
0						AL109811.4	ENSG00000277726.4
0						AL109827.1	ENSG00000272897.5
0						AL110118.2	ENSG00000259066.5
7.75043	0.327542	0.73655	0.444698	0.656538	0.880584	AL117339.5	ENSG00000283930.1
0.407234	-1.88716	4.37641	-0.431212	0.666314	0.887118	AL117348.2	ENSG00000255835.1
0						AL121578.2	ENSG00000229674.2
0.671705	-0.972212	3.12989	-0.310622	0.756088	0.942871	AL121594.1	ENSG00000258790.1
0						AL121722.1	ENSG00000283932.1
0.323244	0	4.40736	0	1	1	AL121753.1	ENSG00000261582.1
0						AL121758.1	ENSG00000270299.1
0						AL121845.2	ENSG00000273047.1
89.9207	-0.378759	0.247397	-1.53098	0.125775	0.311179	AL121845.3	ENSG00000273154.3
0.160366	1.73109	4.3678	0.396329	0.691862	0.902409	AL121900.2	ENSG00000284776.1
0						AL132671.2	ENSG00000282218.1
0						AL132780.3	ENSG00000259132.1
5.28518	2.56899	1.49177	1.72211	0.0850501	0.236508	AL133352.1	ENSG00000255339.6
1.64674	0.350066	2.166	0.161619	0.871606	1	AL133353.2	ENSG00000285932.1
0						AL133410.3	ENSG00000285645.1
0.498124	0	4.40736	0	1	1	AL133500.1	ENSG00000285547.1
278.296	-0.0460624	0.134946	-0.341339	0.732848	0.927031	AL135905.2	ENSG00000285976.1
0.14949	0	4.40736	0	1	1	AL136295.1	ENSG00000254692.1
0						AL136295.3	ENSG00000259371.2
2.95134	-0.121874	1.38243	-0.088159	0.92975	1	AL136295.4	ENSG00000259522.3
35.8986	0.394571	0.412929	0.955541	0.339304	0.604258	AL136295.5	ENSG00000259529.1
4.24401	0.396793	1.27083	0.312232	0.754864	0.941993	AL136373.1	ENSG00000282881.2
2.75351	-2.55297	1.6097	-1.58599	0.112741	0.288665	AL136454.1	ENSG00000231767.4
0.96281	3.57	2.81482	1.26829	0.204695	0.435865	AL136531.2	ENSG00000274322.1
0.454535	0	4.40736	0	1	1	AL138752.2	ENSG00000255872.3
0.575267	2.34792	4.32617	0.542725	0.587319	0.830299	AL139011.2	ENSG00000258465.7
0.224234	0	4.40736	0	1	1	AL139142.2	ENSG00000285777.1
0.166925	0	4.40736	0	1	1	AL139300.1	ENSG00000256500.5
2.67139	4.98049	1.85844	2.67993	0.00736381	0.0363732	AL139353.1	ENSG00000203546.7
0.163646	0.834613	4.40736	0.189368	0.849804	0.985412	AL157392.5	ENSG00000282246.1
10.7499	0.354077	0.726898	0.487107	0.626182	0.859604	AL157935.2	ENSG00000257524.6
0						AL159163.1	ENSG00000249141.1
0						AL160269.1	ENSG00000285269.2
0						AL160272.2	ENSG00000285082.1
15.8872	-0.387762	0.668665	-0.579904	0.561979	0.813043	AL162231.1	ENSG00000187186.14
0.160366	1.73109	4.3678	0.396329	0.691862	0.902409	AL162231.3	ENSG00000258728.1
112.75	-0.59952	0.198269	-3.02378	0.00249642	0.0151522	AL162377.3	ENSG00000285444.1
0						AL162417.1	ENSG00000285245.1
0						AL162596.1	ENSG00000285946.1
0						AL163195.3	ENSG00000259060.7
0						AL163636.2	ENSG00000259171.1
0						AL353572.3	ENSG00000283205.1
5.06144	0.431683	1.03063	0.418852	0.675324	0.893036	AL353588.1	ENSG00000272442.2
0						AL354761.1	ENSG00000236543.2
0						AL355102.2	ENSG00000258691.1
0.325085	-0.925368	4.37641	-0.211445	0.83254	0.983078	AL355312.5	ENSG00000285991.1
0						AL355315.1	ENSG00000249967.1
0						AL355916.2	ENSG00000258989.1
0						AL355987.1	ENSG00000204003.8
0.0781918	0.834622	4.40736	0.18937	0.849803	0.985412	AL355987.3	ENSG00000272896.1
1.13895	3.05301	2.93135	1.0415	0.297642	0.556884	AL357673.1	ENSG00000256407.2
0						AL358075.4	ENSG00000278139.1
0.662037	3.04627	3.77039	0.807945	0.419122	0.685135	AL358113.1	ENSG00000285130.1
10.9064	0.45186	0.762274	0.592779	0.553329	0.806465	AL358472.6	ENSG00000285641.1
0						AL358472.7	ENSG00000285779.1
0						AL359736.1	ENSG00000273167.1
0						AL359922.1	ENSG00000264545.1
0.245466	-1.08892	4.40736	-0.247069	0.804854	0.965971	AL360181.3	ENSG00000254536.1
48.2825	-0.114605	0.296066	-0.387093	0.698688	0.904737	AL365205.1	ENSG00000124593.16
0						AL365214.3	ENSG00000281613.2
0						AL365232.1	ENSG00000243501.5
0						AL365273.2	ENSG00000270099.1
58.4584	0.402239	0.266498	1.50935	0.13121	0.321183	AL391650.1	ENSG00000236782.7
0						AL445238.1	ENSG00000285566.1
0						AL445685.3	ENSG00000285839.1
0						AL445989.1	ENSG00000237378.3
0						AL449266.1	ENSG00000274068.1
0						AL451007.3	ENSG00000284188.2
1.22595	2.34367	2.75907	0.84944	0.395636	0.663066	AL451062.3	ENSG00000284989.1
0						AL512428.1	ENSG00000282804.1
0						AL512506.3	ENSG00000281883.1
0.35232	-0.245383	4.31862	-0.0568199	0.954689	1	AL512785.2	ENSG00000254706.2
0.979788	2.7607	2.74412	1.00604	0.314395	0.576785	AL513165.2	ENSG00000256966.6
0						AL583836.1	ENSG00000276490.1
0.656194	0	3.60791	0	1	1	AL589666.1	ENSG00000271793.1
1.72156	-3.29225	2.28109	-1.44328	0.148942	0.351271	AL590132.1	ENSG00000284299.1
0						AL590764.2	ENSG00000285171.1
0.242433	0	4.40736	0	1	1	AL591806.3	ENSG00000270149.5
0						AL592490.1	ENSG00000197991.11
0.160366	1.73109	4.3678	0.396329	0.691862	0.902409	AL603832.3	ENSG00000271810.5
0						AL645922.1	ENSG00000244255.5
0						AL645941.2	ENSG00000248993.1
0						AL662820.1	ENSG00000285064.1
0						AL662884.4	ENSG00000285085.1
0						AL662899.1	ENSG00000204422.7
0.344783	-2.96402	4.30888	-0.687888	0.491523	0.75411	AL662899.2	ENSG00000263020.6
0						AL669918.1	ENSG00000250264.1
0						AL672043.1	ENSG00000250719.1
0						AL672142.1	ENSG00000251184.1
0						AL691442.1	ENSG00000251246.1
0						AL713999.1	ENSG00000273088.1
0						AL772284.2	ENSG00000277535.2
0						AL807752.6	ENSG00000279073.3
0						AL807752.7	ENSG00000284341.1
0						AL845331.2	ENSG00000259916.1
0.476199	0	4.40736	0	1	1	AL928654.3	ENSG00000257341.5
0						AL929554.1	ENSG00000261793.1
350.147	0.419719	0.116736	3.59544	0.000323839	0.00272062	ALAD	ENSG00000148218.15
477.188	0.209714	0.10616	1.97545	0.048217	0.156145	ALAS1	ENSG00000023330.14
0						ALAS2	ENSG00000158578.20
1.74962	-0.0279798	2.10507	-0.0132916	0.989395	1	ALB	ENSG00000163631.16
910.516	-0.310431	0.0794885	-3.90536	9.40848e-05	0.00095223	ALCAM	ENSG00000170017.12
165.904	-1.24707	0.164269	-7.59158	3.16019e-14	2.37596e-12	ALDH16A1	ENSG00000161618.9
1377.96	-0.393459	0.0651433	-6.0399	1.5421e-09	5.13456e-08	ALDH18A1	ENSG00000059573.8
0						ALDH1A1	ENSG00000165092.12
1.24637	3.32564	2.42496	1.37142	0.170243	0.384858	ALDH1A2	ENSG00000128918.14
37.1744	0.699407	0.384904	1.81709	0.0692029	0.203983	ALDH1A3	ENSG00000184254.16
442.953	-0.205518	0.117193	-1.75368	0.0794859	0.225337	ALDH1B1	ENSG00000137124.7
7.35915	1.32664	0.886225	1.49696	0.134403	0.3266	ALDH1L1	ENSG00000144908.13
455.209	0.126771	0.10798	1.17402	0.240386	0.484483	ALDH1L2	ENSG00000136010.13
488.207	0.0786576	0.12002	0.655374	0.512227	0.77293	ALDH2	ENSG00000111275.12
7.95535	1.07939	0.978522	1.10308	0.269991	0.521784	ALDH3A1	ENSG00000108602.17
669.614	0.209022	0.0925902	2.2575	0.0239769	0.0918918	ALDH3A2	ENSG00000072210.18
10.0334	-0.0467818	0.704823	-0.0663738	0.94708	1	ALDH3B1	ENSG00000006534.15
0.0834625	0	4.40736	0	1	1	ALDH3B2	ENSG00000132746.14
88.2059	-0.0469361	0.227967	-0.20589	0.836877	0.985412	ALDH4A1	ENSG00000159423.16
433.05	-0.342907	0.104233	-3.28982	0.0010025	0.00698968	ALDH5A1	ENSG00000112294.12
67.3711	0.662254	0.238237	2.77981	0.00543908	0.0285333	ALDH6A1	ENSG00000119711.12
972.291	0.0653114	0.0664189	0.983324	0.325448	0.58838	ALDH7A1	ENSG00000164904.17
6.98498	0.371636	0.925438	0.401578	0.687994	0.901721	ALDH8A1	ENSG00000118514.13
415.971	0.358076	0.138373	2.58776	0.00966014	0.0454063	ALDH9A1	ENSG00000143149.12
801.463	-0.133917	0.0911016	-1.46997	0.14157	0.339115	ALDOA	ENSG00000149925.18
5.10084	2.98248	1.37471	2.16954	0.030042	0.109366	ALDOB	ENSG00000136872.18
211.989	-0.209918	0.157636	-1.33167	0.18297	0.403891	ALDOC	ENSG00000109107.13
335.585	-0.00274611	0.115913	-0.0236911	0.981099	1	ALG1	ENSG00000033011.12
62.54	0.559344	0.302562	1.84869	0.0645022	0.193483	ALG10	ENSG00000139133.6
369.321	0.245533	0.121594	2.01929	0.0434571	0.144458	ALG10B	ENSG00000175548.8
134.002	-0.0877122	0.215087	-0.407799	0.683421	0.899485	ALG11	ENSG00000253710.3
267.111	0.0102511	0.133932	0.0765397	0.93899	1	ALG12	ENSG00000182858.13
313.627	-0.329129	0.154734	-2.12706	0.0334149	0.118308	ALG13	ENSG00000101901.11
89.0911	-0.279224	0.248061	-1.12563	0.260324	0.509743	ALG14	ENSG00000172339.9
0						ALG1L	ENSG00000189366.9
0.0952398	0	4.40736	0	1	1	ALG1L2	ENSG00000251287.8
289.067	0.0547149	0.139954	0.390949	0.695835	0.904075	ALG2	ENSG00000119523.9
450.95	-0.423171	0.113818	-3.71797	0.00020083	0.00182131	ALG3	ENSG00000214160.9
288.03	0.189965	0.122697	1.54824	0.121563	0.303978	ALG5	ENSG00000120697.8
111.341	0.407919	0.195339	2.08827	0.0367739	0.127219	ALG6	ENSG00000088035.16
370.402	0.173397	0.131055	1.32308	0.185809	0.408054	ALG8	ENSG00000159063.12
198.8	-0.131399	0.151145	-0.869354	0.384654	0.652216	ALG9	ENSG00000086848.14
17853.6	0.365672	0.0467289	7.82539	5.06097e-15	4.27822e-13	ALK	ENSG00000171094.17
1.70702	0	2.59688	0	1	1	ALKAL1	ENSG00000196711.8
0.869355	4.05596	2.95076	1.37455	0.169271	0.383457	ALKAL2	ENSG00000189292.15
147.575	-0.285728	0.186386	-1.53299	0.125279	0.310296	ALKBH1	ENSG00000100601.9
213.425	-0.456598	0.141456	-3.22785	0.00124724	0.00840857	ALKBH2	ENSG00000189046.10
101.147	-0.13653	0.249378	-0.547482	0.584047	0.828225	ALKBH3	ENSG00000166199.12
162.287	0.0525441	0.169152	0.310633	0.756079	0.942871	ALKBH4	ENSG00000160993.3
716.127	0.00823838	0.0980891	0.0839887	0.933065	1	ALKBH5	ENSG00000091542.8
75.6519	-0.335937	0.295414	-1.13717	0.255466	0.503793	ALKBH6	ENSG00000239382.10
184.956	-0.330428	0.156285	-2.11426	0.0344932	0.121023	ALKBH7	ENSG00000125652.7
169.85	-0.566657	0.166076	-3.41202	0.000644823	0.00487276	ALKBH8	ENSG00000137760.14
2.37	-0.80049	1.62693	-0.492024	0.622703	0.856465	ALLC	ENSG00000151360.9
809.587	-0.327482	0.0847344	-3.86481	0.000111177	0.00109598	ALMS1	ENSG00000116127.17
0.178102	-0.127128	4.40736	-0.0288444	0.976989	1	ALOX12	ENSG00000108839.11
1.0585	1.37169	2.52792	0.542618	0.587393	0.830299	ALOX12B	ENSG00000179477.10
0.0657782	0	4.40736	0	1	1	ALOX15	ENSG00000161905.12
0						ALOX15B	ENSG00000179593.15
0						ALOX5	ENSG00000012779.10
0.175423	0.834613	4.40736	0.189368	0.849804	0.985412	ALOX5AP	ENSG00000132965.9
0.991324	1.79903	2.88131	0.624379	0.532378	0.788539	ALOXE3	ENSG00000179148.9
0						ALPG	ENSG00000163286.8
0						ALPI	ENSG00000163295.4
1.02523	2.28793	2.621	0.872923	0.382705	0.650264	ALPK1	ENSG00000073331.17
0.945446	-1.58955	3.13464	-0.507093	0.61209	0.847297	ALPK2	ENSG00000198796.6
6.54383	-2.49306	0.988145	-2.52297	0.0116369	0.0528698	ALPK3	ENSG00000136383.6
23.9514	-0.501791	0.482065	-1.04092	0.297912	0.557006	ALPL	ENSG00000162551.13
0						ALPP	ENSG00000163283.6
531.519	0.0253273	0.114136	0.221905	0.824388	0.978497	ALS2	ENSG00000003393.14
18.5468	1.42287	0.658454	2.16092	0.0307015	0.111088	ALS2CL	ENSG00000178038.16
0.911323	3.32613	2.78754	1.19322	0.232785	0.474617	ALS2CR12	ENSG00000155749.12
25.4791	0.0611995	0.391632	0.156268	0.875822	1	ALX1	ENSG00000180318.3
79.3123	0.0655984	0.242854	0.270114	0.787072	0.962742	ALX3	ENSG00000156150.7
2.01018	3.56734	2.17196	1.64245	0.100496	0.265736	ALX4	ENSG00000052850.6
1036.46	-0.568848	0.140007	-4.06299	4.84478e-05	0.000537705	ALYREF	ENSG00000183684.7
46.6361	0.707847	0.346138	2.04498	0.0408565	0.137864	AMACR	ENSG00000242110.7
0.517559	0	4.40736	0	1	1	AMBN	ENSG00000178522.14
0						AMBP	ENSG00000106927.11
577.54	-0.179118	0.0923528	-1.93949	0.0524411	0.165701	AMBRA1	ENSG00000110497.14
604.679	-0.043093	0.0859412	-0.501424	0.616073	0.850717	AMD1	ENSG00000123505.15
7.96587	2.77087	1.45366	1.90613	0.0566332	0.175656	AMDHD1	ENSG00000139344.7
319.303	0.20427	0.138456	1.47535	0.14012	0.336679	AMDHD2	ENSG00000162066.15
0						AMELX	ENSG00000125363.14
0						AMELY	ENSG00000099721.13
331.774	-0.298808	0.114705	-2.60501	0.00918727	0.0435348	AMER1	ENSG00000184675.10
355.486	-0.0450799	0.117879	-0.382424	0.702147	0.906579	AMER2	ENSG00000165566.12
178.602	-0.369822	0.186579	-1.98212	0.0474656	0.154079	AMER3	ENSG00000178171.10
341.154	-0.436513	0.131367	-3.32286	0.000891011	0.00634243	AMFR	ENSG00000159461.14
1584.34	-0.418885	0.0705706	-5.93568	2.92623e-09	9.18106e-08	AMH	ENSG00000104899.7
0.0861957	-1.08891	4.40736	-0.247065	0.804858	0.965971	AMHR2	ENSG00000135409.10
207.827	-0.00543999	0.13824	-0.0393518	0.96861	1	AMIGO1	ENSG00000181754.6
17.1559	0.899568	0.520558	1.72808	0.0839733	0.234433	AMIGO2	ENSG00000139211.6
0						AMIGO3	ENSG00000176020.8
135.721	0.2007	0.18697	1.07343	0.283076	0.537898	AMMECR1	ENSG00000101935.9
582.789	-0.245799	0.106111	-2.31643	0.0205351	0.0813771	AMMECR1L	ENSG00000144233.9
119.856	-0.0519587	0.195673	-0.265538	0.790595	0.964955	AMN	ENSG00000166126.10
116.389	0.0379782	0.208132	0.182471	0.855213	0.98899	AMN1	ENSG00000151743.10
83.2292	0.166536	0.279904	0.594973	0.551862	0.805117	AMOT	ENSG00000126016.15
2223.67	-0.0617767	0.0609361	-1.0138	0.31068	0.572158	AMOTL1	ENSG00000166025.17
194.405	-0.132327	0.153131	-0.864147	0.387507	0.654809	AMOTL2	ENSG00000114019.14
0						AMPD1	ENSG00000116748.21
626.545	-0.207551	0.0805876	-2.57547	0.0100103	0.0467425	AMPD2	ENSG00000116337.15
108.549	-0.035013	0.207829	-0.16847	0.866214	0.996283	AMPD3	ENSG00000133805.15
94.7428	0.0257424	0.281454	0.091462	0.927126	1	AMPH	ENSG00000078053.16
14.8629	0.460882	0.57374	0.803295	0.421804	0.687821	AMT	ENSG00000145020.15
0.357405	0	4.40736	0	1	1	AMTN	ENSG00000187689.9
0						AMY1A	ENSG00000237763.9
0						AMY1B	ENSG00000174876.16
0						AMY1C	ENSG00000187733.6
0						AMY2A	ENSG00000243480.7
52.9054	0.567559	0.381735	1.48679	0.137071	0.331306	AMY2B	ENSG00000240038.6
5.06818	2.48251	1.36148	1.8234	0.0682432	0.201884	AMZ1	ENSG00000174945.13
708.57	-0.0594702	0.0938693	-0.633543	0.526379	0.784847	AMZ2	ENSG00000196704.11
947.797	-0.150619	0.0664085	-2.26808	0.0233245	0.0898135	ANAPC1	ENSG00000153107.12
59.5876	0.436007	0.319601	1.36422	0.172498	0.388082	ANAPC10	ENSG00000164162.13
670.268	0.0641241	0.0746585	0.858898	0.390397	0.657852	ANAPC11	ENSG00000141552.17
393.344	-0.472372	0.107323	-4.40142	1.07544e-05	0.000142765	ANAPC13	ENSG00000129055.12
52.8377	-1.54666	0.302393	-5.11474	3.1418e-07	6.3204e-06	ANAPC15	ENSG00000110200.8
462.477	-0.0852288	0.0983005	-0.867023	0.38593	0.653022	ANAPC16	ENSG00000166295.8
580.685	0.226511	0.104354	2.17061	0.0299609	0.109159	ANAPC2	ENSG00000176248.8
296.678	0.515105	0.121761	4.23045	2.33228e-05	0.000281235	ANAPC4	ENSG00000053900.10
2014.35	0.20164	0.0555785	3.62801	0.000285612	0.00244478	ANAPC5	ENSG00000089053.12
983.454	-0.0318141	0.0774676	-0.410676	0.68131	0.89782	ANAPC7	ENSG00000196510.12
0.498013	0.769305	4.00951	0.19187	0.847844	0.985412	ANG	ENSG00000214274.9
391.465	0.331121	0.112873	2.93356	0.00335099	0.0193596	ANGEL1	ENSG00000013523.9
422.454	0.262824	0.117797	2.23116	0.0256703	0.0968572	ANGEL2	ENSG00000174606.13
0						ANGPT1	ENSG00000154188.9
29.6979	-0.598897	0.387913	-1.54389	0.122614	0.305645	ANGPT2	ENSG00000091879.13
1.66068	0	2.46002	0	1	1	ANGPT4	ENSG00000101280.7
0.0810746	-1.08891	4.40736	-0.247065	0.804858	0.965971	ANGPTL1	ENSG00000116194.12
133.696	-0.273073	0.194113	-1.40678	0.159494	0.367069	ANGPTL2	ENSG00000136859.9
1.6356	-1.4366	2.30511	-0.623222	0.533138	0.788741	ANGPTL3	ENSG00000132855.4
23.2454	2.26271	0.743884	3.04175	0.00235206	0.0144317	ANGPTL4	ENSG00000167772.11
0.328891	0	4.40736	0	1	1	ANGPTL5	ENSG00000187151.7
3.65165	-1.39505	1.35938	-1.02624	0.304779	0.565455	ANGPTL6	ENSG00000130812.10
0						ANGPTL7	ENSG00000171819.4
0						ANGPTL8	ENSG00000130173.13
0						ANHX	ENSG00000227059.6
219.762	0.431655	0.141928	3.04137	0.00235507	0.0144428	ANK1	ENSG00000029534.20
969.817	0.135603	0.0673449	2.01357	0.044055	0.145674	ANK2	ENSG00000145362.17
48.6534	0.111615	0.35883	0.311054	0.755759	0.942618	ANK3	ENSG00000151150.21
23.5599	1.45821	0.508101	2.86992	0.00410572	0.0228539	ANKAR	ENSG00000151687.14
154.18	0.197664	0.183032	1.07994	0.280169	0.534633	ANKDD1A	ENSG00000166839.16
3.40308	-1.19266	1.28283	-0.929708	0.352522	0.618297	ANKDD1B	ENSG00000189045.13
90.8245	0.0960021	0.24739	0.388059	0.697972	0.904409	ANKEF1	ENSG00000132623.15
0.292574	0	4.40736	0	1	1	ANKFN1	ENSG00000153930.11
1412.6	0.314976	0.0610111	5.1626	2.43543e-07	4.99799e-06	ANKFY1	ENSG00000185722.17
950.847	0.00992759	0.0671751	0.147787	0.882511	1	ANKH	ENSG00000154122.13
87.0818	-0.95992	0.209875	-4.57377	4.79015e-06	6.99653e-05	ANKHD1	ENSG00000131503.20
64.1768	-0.00916981	0.268024	-0.0342127	0.972708	1	ANKHD1-EIF4EBP3	ENSG00000254996.5
838.935	0.0236636	0.0753844	0.313906	0.753592	0.941269	ANKIB1	ENSG00000001629.9
1.05981	-0.790091	2.45797	-0.321441	0.747876	0.937575	ANKK1	ENSG00000170209.4
76.8268	-0.153116	0.245154	-0.624572	0.532252	0.788495	ANKLE1	ENSG00000160117.14
1528.54	0.213116	0.062705	3.39871	0.000677043	0.00506463	ANKLE2	ENSG00000176915.14
93.0368	0.158398	0.197313	0.802773	0.422106	0.688115	ANKMY1	ENSG00000144504.15
64.2191	-0.49311	0.264314	-1.86562	0.0620939	0.187917	ANKMY2	ENSG00000106524.8
145.747	0.583682	0.192451	3.03289	0.00242227	0.014757	ANKRA2	ENSG00000164331.9
0.176051	0	4.40736	0	1	1	ANKRD1	ENSG00000148677.6
872.286	0.570086	0.0830018	6.86836	6.49448e-12	3.34251e-10	ANKRD10	ENSG00000088448.14
1322.53	0.096302	0.0577932	1.66632	0.0956499	0.256666	ANKRD11	ENSG00000167522.15
517.635	-0.0613257	0.108109	-0.567256	0.57054	0.819176	ANKRD12	ENSG00000101745.16
587.586	0.502683	0.103187	4.87158	1.10711e-06	1.93804e-05	ANKRD13A	ENSG00000076513.16
1522.74	-0.416684	0.0673666	-6.18532	6.19781e-10	2.22725e-08	ANKRD13B	ENSG00000198720.12
253.085	0.176547	0.132463	1.33281	0.182595	0.403337	ANKRD13C	ENSG00000118454.12
400.721	0.0272407	0.117148	0.232532	0.816125	0.973396	ANKRD13D	ENSG00000172932.14
69.7103	0.0745279	0.275827	0.270198	0.787008	0.962738	ANKRD16	ENSG00000134461.15
1853.5	0.0297947	0.0569469	0.523201	0.600834	0.83783	ANKRD17	ENSG00000132466.18
100.194	0.185736	0.271622	0.683804	0.494099	0.756572	ANKRD18A	ENSG00000180071.19
175.558	0.241835	0.1707	1.41672	0.156564	0.363349	ANKRD18B	ENSG00000230453.9
0						ANKRD2	ENSG00000165887.11
0.159003	0.834613	4.40736	0.189368	0.849804	0.985412	ANKRD20A1	ENSG00000260691.5
0.230301	0	4.40736	0	1	1	ANKRD20A2	ENSG00000183148.6
0.0801831	0.834622	4.40736	0.18937	0.849803	0.985412	ANKRD20A3	ENSG00000276203.4
0.161622	0	4.40736	0	1	1	ANKRD20A4	ENSG00000172014.12
0						ANKRD22	ENSG00000152766.5
7.46891	1.31778	0.875376	1.50539	0.132223	0.322647	ANKRD23	ENSG00000163126.14
5.93717	-1.36639	1.24016	-1.10179	0.270554	0.522378	ANKRD24	ENSG00000089847.12
189.275	0.0478612	0.16026	0.298648	0.765209	0.948734	ANKRD26	ENSG00000107890.16
390.262	-0.211308	0.112896	-1.87171	0.0612472	0.186045	ANKRD27	ENSG00000105186.15
811.68	0.0189382	0.0846895	0.223619	0.823053	0.977583	ANKRD28	ENSG00000206560.11
2.93983	-2.14857	1.61098	-1.33371	0.1823	0.403011	ANKRD29	ENSG00000154065.16
0						ANKRD30A	ENSG00000148513.17
0						ANKRD30B	ENSG00000180777.13
0						ANKRD30BL	ENSG00000163046.15
18.8092	0.449313	0.602436	0.745827	0.455772	0.721933	ANKRD31	ENSG00000145700.9
0						ANKRD33	ENSG00000167612.12
6.79209	0.473388	1.53178	0.309045	0.757287	0.943444	ANKRD33B	ENSG00000164236.11
40.9551	-0.39617	0.300251	-1.31946	0.187014	0.409735	ANKRD34A	ENSG00000272031.2
2.01396	-3.26272	2.04403	-1.59622	0.110441	0.284697	ANKRD34B	ENSG00000189127.7
1.35347	-3.50038	2.50512	-1.39729	0.162326	0.371698	ANKRD34C	ENSG00000235711.4
0						ANKRD35	ENSG00000198483.12
110.834	0.306516	0.220777	1.38835	0.165031	0.376254	ANKRD36	ENSG00000135976.18
41.3372	-0.00292458	0.318871	-0.00917168	0.992682	1	ANKRD36B	ENSG00000196912.12
97.6703	0.453305	0.218014	2.07925	0.0375944	0.129236	ANKRD36C	ENSG00000174501.14
74.3087	-0.0642019	0.281609	-0.227982	0.81966	0.975595	ANKRD37	ENSG00000186352.8
112.659	-0.132566	0.225805	-0.587081	0.557149	0.809357	ANKRD39	ENSG00000213337.8
772.677	-0.331196	0.0888745	-3.72656	0.000194108	0.0017702	ANKRD40	ENSG00000154945.6
0						ANKRD40CL	ENSG00000167117.9
46.4099	0.199261	0.353107	0.564307	0.572545	0.820328	ANKRD42	ENSG00000137494.13
228.416	-0.107063	0.142248	-0.752651	0.45166	0.717929	ANKRD44	ENSG00000065413.19
5.32535	-1.61718	1.04804	-1.54305	0.122819	0.305923	ANKRD45	ENSG00000183831.6
416.628	0.437932	0.109124	4.01317	5.99079e-05	0.000646854	ANKRD46	ENSG00000186106.11
99.3926	-0.700132	0.210434	-3.32708	0.000877598	0.00627882	ANKRD49	ENSG00000168876.8
1081.21	-0.164726	0.0823577	-2.00013	0.0454863	0.149288	ANKRD50	ENSG00000151458.11
1106.74	-0.50082	0.0793878	-6.30852	2.8171e-10	1.08144e-08	ANKRD52	ENSG00000139645.9
3.00198	2.57615	1.76309	1.46116	0.143972	0.343271	ANKRD53	ENSG00000144031.11
391.339	0.111143	0.100016	1.11125	0.26646	0.517289	ANKRD54	ENSG00000100124.14
0.814632	1.5089	3.4361	0.439131	0.660567	0.88359	ANKRD55	ENSG00000164512.17
149.635	0.415075	0.184827	2.24575	0.0247198	0.0940101	ANKRD6	ENSG00000135299.16
0						ANKRD60	ENSG00000124227.5
3.96238	2.15968	1.21541	1.77691	0.0755825	0.217953	ANKRD61	ENSG00000157999.5
12.5982	0.665685	0.687387	0.968429	0.33283	0.597389	ANKRD62	ENSG00000181626.11
0.552714	-3.0554	4.09012	-0.74702	0.455052	0.721283	ANKRD63	ENSG00000230778.1
1.01796	2.69963	2.95581	0.913331	0.361069	0.628021	ANKRD65	ENSG00000235098.8
0						ANKRD66	ENSG00000230062.5
3.2849	-0.39182	1.43218	-0.273583	0.784405	0.961284	ANKRD7	ENSG00000106013.14
253.602	0.0364892	0.125123	0.291625	0.770573	0.952922	ANKRD9	ENSG00000156381.8
597.678	0.323435	0.0914946	3.53502	0.000407749	0.00331131	ANKS1A	ENSG00000064999.14
26.3335	-1.42444	0.501612	-2.83973	0.00451523	0.024687	ANKS1B	ENSG00000185046.18
300.886	0.212349	0.132277	1.60534	0.108419	0.280905	ANKS3	ENSG00000168096.14
0.19048	0	4.40736	0	1	1	ANKS4B	ENSG00000175311.6
398.764	-0.0727179	0.10902	-0.667016	0.504762	0.766989	ANKS6	ENSG00000165138.17
0.285719	0	4.40736	0	1	1	ANKUB1	ENSG00000206199.10
454.315	0.142383	0.122704	1.16038	0.245895	0.491881	ANKZF1	ENSG00000163516.13
1101.69	0.0803886	0.0843606	0.952917	0.340632	0.605647	ANLN	ENSG00000011426.10
2.13274	-2.03368	2.05728	-0.988526	0.322895	0.585727	ANO1	ENSG00000131620.17
217.424	0.346864	0.169185	2.05021	0.0403441	0.136531	ANO10	ENSG00000160746.12
0.380618	1.69885	4.37049	0.388709	0.697492	0.904075	ANO2	ENSG00000047617.14
1.6012	0.748189	2.30009	0.325287	0.744964	0.93537	ANO3	ENSG00000134343.12
4.70629	2.08622	1.15164	1.81152	0.0700603	0.205989	ANO4	ENSG00000151572.17
191.271	-0.305812	0.156985	-1.94803	0.0514111	0.163344	ANO5	ENSG00000171714.11
1635.09	0.0288676	0.063056	0.457809	0.64709	0.874753	ANO6	ENSG00000177119.15
13.1056	-0.696331	0.604285	-1.15232	0.249189	0.495687	ANO7	ENSG00000146205.13
569.608	-0.0583232	0.0956833	-0.609544	0.542164	0.796994	ANO8	ENSG00000074855.10
0.0918546	0	4.40736	0	1	1	ANO9	ENSG00000185101.12
23.0246	0.187922	0.440575	0.426537	0.669717	0.88953	ANOS1	ENSG00000011201.11
1820.73	-0.45521	0.0762275	-5.97173	2.34749e-09	7.55409e-08	ANP32A	ENSG00000140350.15
1424.94	-0.604208	0.0703662	-8.58663	8.95608e-18	1.1327e-15	ANP32B	ENSG00000136938.8
0						ANP32D	ENSG00000139223.2
848.354	-1.21514	0.0738244	-16.4599	7.12489e-61	1.45303e-57	ANP32E	ENSG00000143401.14
38.9115	0.918614	0.43913	2.0919	0.0364477	0.1265	ANPEP	ENSG00000166825.13
726.676	0.0276175	0.0969102	0.28498	0.775659	0.955879	ANTXR1	ENSG00000169604.19
209.212	-0.269888	0.181751	-1.48493	0.137563	0.332198	ANTXR2	ENSG00000163297.16
0						ANTXRL	ENSG00000274209.4
4.82962	-0.127156	1.93085	-0.0658549	0.947493	1	ANXA1	ENSG00000135046.13
0						ANXA10	ENSG00000109511.11
458.057	0.116923	0.106546	1.09739	0.272471	0.524837	ANXA11	ENSG00000122359.17
0						ANXA13	ENSG00000104537.16
231.07	-0.294952	0.143405	-2.05678	0.0397073	0.134926	ANXA2	ENSG00000182718.16
4.18963	3.57259	1.44273	2.47627	0.0132764	0.0584311	ANXA2R	ENSG00000177721.4
0.911796	0.834615	3.3603	0.248375	0.803844	0.965971	ANXA3	ENSG00000138772.12
56.9589	0.502179	0.294636	1.70441	0.0883054	0.24291	ANXA4	ENSG00000196975.15
944.305	0.100442	0.072069	1.3937	0.16341	0.373603	ANXA5	ENSG00000164111.14
1055.27	-0.150588	0.0746356	-2.01764	0.0436287	0.144687	ANXA6	ENSG00000197043.13
251.623	-0.375854	0.134233	-2.80002	0.00510989	0.0271645	ANXA7	ENSG00000138279.15
0						ANXA8	ENSG00000265190.6
0						ANXA8L1	ENSG00000264230.8
3.44886	0.578816	2.71604	0.21311	0.831241	0.982589	ANXA9	ENSG00000143412.9
0.0952398	0	4.40736	0	1	1	AOAH	ENSG00000136250.11
0.181436	-1.08891	4.40736	-0.247068	0.804856	0.965971	AOC1	ENSG00000002726.20
10.516	-0.302917	0.949597	-0.318996	0.74973	0.938457	AOC2	ENSG00000131480.8
11.1161	-0.423352	1.48805	-0.284501	0.776026	0.956077	AOC3	ENSG00000131471.6
135.173	0.234785	0.180471	1.30095	0.193274	0.419393	AOX1	ENSG00000138356.13
0						AP000275.2	ENSG00000265590.9
1.65264	3.02423	2.23944	1.35044	0.176876	0.394279	AP000295.1	ENSG00000249624.9
0						AP000311.1	ENSG00000249209.2
0						AP000350.4	ENSG00000251357.4
4.12174	-0.263958	1.13851	-0.231844	0.816659	0.973493	AP000646.1	ENSG00000285509.1
0						AP000721.1	ENSG00000256100.1
0.400916	3.05302	4.29575	0.710706	0.477267	0.74017	AP000781.2	ENSG00000254979.5
0						AP000812.4	ENSG00000284844.1
0						AP000812.5	ENSG00000284922.1
3.80472	-0.903219	1.19031	-0.758812	0.447965	0.714005	AP000944.2	ENSG00000285816.1
0.250388	0	4.40736	0	1	1	AP001267.5	ENSG00000285827.1
0						AP001273.2	ENSG00000284057.1
0						AP001458.2	ENSG00000255432.1
0						AP001781.2	ENSG00000258529.5
0						AP001931.1	ENSG00000254732.1
0.369182	0	4.40736	0	1	1	AP002373.1	ENSG00000255663.1
8.78898	0.0591201	0.739092	0.0799902	0.936245	1	AP002495.1	ENSG00000254469.7
0						AP002512.3	ENSG00000284732.1
0						AP002748.4	ENSG00000256349.1
1.05856	0.796722	3.22845	0.246781	0.805077	0.965971	AP002884.3	ENSG00000255292.8
54.1714	-0.468865	0.3014	-1.55562	0.119797	0.30083	AP002990.1	ENSG00000255508.7
10.5764	0.0574642	0.886957	0.064788	0.948343	1	AP003071.5	ENSG00000284713.1
10.5603	0.590857	0.789418	0.748471	0.454176	0.720665	AP003108.2	ENSG00000256591.5
0						AP003419.1	ENSG00000256514.1
193.795	0.101653	0.156488	0.649587	0.515959	0.775912	AP1AR	ENSG00000138660.11
1118.1	0.20039	0.0794768	2.52136	0.0116902	0.0530236	AP1B1	ENSG00000100280.16
1103.57	-0.0376807	0.0688998	-0.546891	0.584454	0.828514	AP1G1	ENSG00000166747.12
278.609	0.341977	0.146717	2.33086	0.0197607	0.0791157	AP1G2	ENSG00000213983.11
901.252	0.0513269	0.0805154	0.63748	0.523812	0.782814	AP1M1	ENSG00000072958.8
3.93305	1.58017	1.15915	1.36322	0.172814	0.388462	AP1M2	ENSG00000129354.11
412.396	-0.326812	0.121697	-2.68544	0.0072434	0.0359307	AP1S1	ENSG00000106367.14
828.8	0.0877586	0.0724251	1.21172	0.225621	0.464598	AP1S2	ENSG00000182287.14
22.6344	-1.15024	0.437543	-2.62887	0.00856702	0.0411333	AP1S3	ENSG00000152056.16
1096.91	-0.0162991	0.0746835	-0.218243	0.82724	0.980275	AP2A1	ENSG00000196961.12
168.622	-0.0823315	0.227704	-0.361572	0.717672	0.915466	AP2A2	ENSG00000183020.13
4108.16	0.0997362	0.0567714	1.7568	0.0789514	0.224211	AP2B1	ENSG00000006125.17
1662.24	0.00998736	0.0700024	0.142672	0.886549	1	AP2M1	ENSG00000161203.13
250.095	-0.213886	0.145292	-1.47211	0.140992	0.338128	AP2S1	ENSG00000042753.11
414.597	-0.0938248	0.113686	-0.825298	0.409202	0.67463	AP3B1	ENSG00000132842.13
1293.36	0.444576	0.0778324	5.71196	1.11682e-08	3.07659e-07	AP3B2	ENSG00000103723.13
2173.21	0.163066	0.0604454	2.69773	0.00698131	0.0349172	AP3D1	ENSG00000065000.17
1006.85	-0.368821	0.0844604	-4.3668	1.2608e-05	0.000164166	AP3M1	ENSG00000185009.12
461.628	0.075825	0.0963697	0.786813	0.431391	0.697057	AP3M2	ENSG00000070718.11
341.642	-0.28388	0.114647	-2.47613	0.0132816	0.0584385	AP3S1	ENSG00000177879.15
414.313	0.488087	0.110218	4.42837	9.49468e-06	0.000127494	AP3S2	ENSG00000157823.16
204.501	-0.379863	0.158305	-2.39956	0.0164149	0.0688455	AP4B1	ENSG00000134262.12
289.422	0.144806	0.135361	1.06978	0.28472	0.540203	AP4E1	ENSG00000081014.10
384.037	0.153511	0.119373	1.28598	0.198451	0.426949	AP4M1	ENSG00000221838.9
82.0912	-0.0688742	0.255417	-0.269654	0.787427	0.962817	AP4S1	ENSG00000100478.14
105.249	0.349857	0.212783	1.6442	0.100135	0.265125	AP5B1	ENSG00000254470.2
466.002	0.156462	0.103592	1.51036	0.130952	0.320696	AP5M1	ENSG00000053770.11
54.4666	-0.23503	0.304639	-0.771504	0.440408	0.706446	AP5S1	ENSG00000125843.10
323.027	-0.0678928	0.136833	-0.496174	0.619772	0.85409	AP5Z1	ENSG00000242802.7
424.262	0.160113	0.119142	1.34388	0.178988	0.397574	APAF1	ENSG00000120868.13
76.0799	1.21908	0.285988	4.26272	2.01956e-05	0.000247925	APBA1	ENSG00000107282.7
194.271	-0.70582	0.35754	-1.9741	0.0483701	0.156486	APBA2	ENSG00000034053.14
227.09	0.279648	0.165455	1.69017	0.0909954	0.248176	APBA3	ENSG00000011132.11
971.552	-0.00144776	0.0838057	-0.0172751	0.986217	1	APBB1	ENSG00000166313.18
0						APBB1IP	ENSG00000077420.15
461.524	-0.127884	0.132598	-0.96445	0.33482	0.599545	APBB2	ENSG00000163697.16
412.378	0.40723	0.10975	3.71051	0.000206843	0.00185832	APBB3	ENSG00000113108.19
1044.83	0.0457998	0.072175	0.634566	0.525712	0.784576	APC	ENSG00000134982.16
1999.34	0.0763852	0.0560535	1.36272	0.172971	0.388601	APC2	ENSG00000115266.11
19.4724	-1.11246	0.465358	-2.39055	0.016823	0.0700706	APCDD1	ENSG00000154856.12
3.46041	3.32412	1.84276	1.80389	0.0712493	0.208516	APCDD1L	ENSG00000198768.10
0						APCS	ENSG00000132703.3
761.831	0.179167	0.0850318	2.10706	0.0351123	0.122799	APEH	ENSG00000164062.12
0						APELA	ENSG00000248329.5
1605.31	-0.410065	0.0696372	-5.88859	3.89498e-09	1.18779e-07	APEX1	ENSG00000100823.11
215.969	0.11758	0.176297	0.666945	0.504807	0.766989	APEX2	ENSG00000169188.4
992.708	-0.0713248	0.0892155	-0.799467	0.42402	0.689925	APH1A	ENSG00000117362.12
192.428	0.194033	0.166518	1.16524	0.243924	0.489345	APH1B	ENSG00000138613.13
1094.27	0.0186723	0.0661528	0.28226	0.777744	0.957301	API5	ENSG00000166181.12
175.115	0.181804	0.160404	1.13341	0.257043	0.505381	APIP	ENSG00000149089.12
23.2779	0.685924	0.405792	1.69033	0.0909641	0.248132	APLF	ENSG00000169621.9
18.0944	0.386953	0.532229	0.727043	0.4672	0.731373	APLN	ENSG00000171388.11
6.76594	-0.450946	1.07675	-0.418804	0.67536	0.893036	APLNR	ENSG00000134817.10
2252.89	0.00767629	0.0627481	0.122335	0.902634	1	APLP1	ENSG00000105290.11
3087.44	0.139262	0.058779	2.36925	0.0178243	0.0731778	APLP2	ENSG00000084234.17
991.69	0.208554	0.0829987	2.51274	0.0119797	0.0540662	APMAP	ENSG00000101474.11
0.147903	0.834613	4.40736	0.189368	0.849804	0.985412	APOA1	ENSG00000118137.9
0						APOA2	ENSG00000158874.11
0						APOA4	ENSG00000110244.6
1.05325	-3.46813	3.18456	-1.08905	0.276133	0.530076	APOA5	ENSG00000110243.11
1.88733	-0.154847	2.22248	-0.069673	0.944454	1	APOB	ENSG00000084674.14
0						APOBEC1	ENSG00000111701.6
0.33385	0	4.40736	0	1	1	APOBEC2	ENSG00000124701.5
0						APOBEC3A	ENSG00000128383.12
0.253477	0	4.40736	0	1	1	APOBEC3B	ENSG00000179750.15
6.25004	0.351775	1.18041	0.298011	0.765695	0.949133	APOBEC3C	ENSG00000244509.3
0.777085	-0.500139	3.20551	-0.156025	0.876014	1	APOBEC3D	ENSG00000243811.9
7.61264	1.88079	1.23503	1.52287	0.127791	0.314798	APOBEC3F	ENSG00000128394.16
7.26338	1.38699	1.0093	1.37422	0.169375	0.383585	APOBEC3G	ENSG00000239713.8
0						APOBEC3H	ENSG00000100298.15
0.0657782	0	4.40736	0	1	1	APOBEC4	ENSG00000173627.7
1.8364	3.86994	3.7637	1.02823	0.303843	0.564472	APOBR	ENSG00000184730.10
3.81633	3.52842	1.65449	2.13263	0.0329551	0.117036	APOC1	ENSG00000130208.9
0						APOC2	ENSG00000234906.9
0						APOC3	ENSG00000110245.11
0						APOC4	ENSG00000267467.3
0						APOC4-APOC2	ENSG00000224916.9
0.080811	0	4.40736	0	1	1	APOD	ENSG00000189058.8
10.8763	0.566961	0.877114	0.646394	0.518024	0.777912	APOE	ENSG00000130203.9
0						APOF	ENSG00000175336.9
0						APOH	ENSG00000091583.10
0						APOL1	ENSG00000100342.20
115.292	0.179507	0.203315	0.882903	0.377289	0.644551	APOL2	ENSG00000128335.13
0.0657782	0	4.40736	0	1	1	APOL3	ENSG00000128284.19
1.09437	-0.771479	2.88151	-0.267734	0.788904	0.963873	APOL4	ENSG00000100336.17
0						APOL5	ENSG00000128313.2
0.49329	0.834586	4.40736	0.189362	0.849809	0.985412	APOL6	ENSG00000221963.5
264.563	2.52358	0.27792	9.08025	1.08326e-19	1.73269e-17	APOLD1	ENSG00000178878.12
0.158375	1.71505	4.36913	0.392537	0.694661	0.904075	APOM	ENSG00000204444.10
66.3344	-0.77596	0.245565	-3.1599	0.00157825	0.010275	APOO	ENSG00000184831.13
311.959	0.247169	0.139628	1.7702	0.076694	0.22037	APOOL	ENSG00000155008.13
133.301	0.708323	0.22236	3.18547	0.00144517	0.00953106	APOPT1	ENSG00000256053.7
4892.18	-0.0670962	0.0478128	-1.40331	0.160525	0.368804	APP	ENSG00000142192.20
912.879	-0.14479	0.0907716	-1.59511	0.110689	0.28484	APPBP2	ENSG00000062725.9
731.994	-0.126808	0.165607	-0.765716	0.443845	0.709935	APPL1	ENSG00000157500.11
325.399	0.0162434	0.125194	0.129745	0.896768	1	APPL2	ENSG00000136044.11
160.566	-0.252245	0.167864	-1.50268	0.132922	0.323796	APRT	ENSG00000198931.10
259.808	0.00889174	0.141124	0.0630066	0.949761	1	APTX	ENSG00000137074.18
6.09806	-0.954781	1.13969	-0.837755	0.402168	0.669282	AQP1	ENSG00000240583.11
32.2822	-0.100946	0.357919	-0.282036	0.777916	0.957301	AQP10	ENSG00000143595.12
23.0958	-0.44238	0.496922	-0.89024	0.373337	0.640514	AQP11	ENSG00000178301.3
0						AQP12A	ENSG00000184945.13
0						AQP12B	ENSG00000185176.12
0.418767	0.509749	4.28778	0.118884	0.905367	1	AQP2	ENSG00000167580.7
111.748	1.51283	0.385744	3.92186	8.78697e-05	0.000895997	AQP3	ENSG00000165272.15
1.66247	0	2.62793	0	1	1	AQP4	ENSG00000171885.14
55.0729	0.641943	0.408787	1.57036	0.116331	0.295216	AQP5	ENSG00000161798.6
20.8627	-0.885257	0.567236	-1.56065	0.118607	0.299055	AQP6	ENSG00000086159.12
0.311112	0	4.40736	0	1	1	AQP7	ENSG00000165269.12
0						AQP8	ENSG00000103375.10
0						AQP9	ENSG00000103569.9
1203.76	-0.0281188	0.0702689	-0.40016	0.689038	0.902082	AQR	ENSG00000021776.10
0.367419	0	4.40736	0	1	1	AR	ENSG00000169083.16
200.888	-1.05169	0.14191	-7.41102	1.25333e-13	8.52001e-12	ARAF	ENSG00000078061.12
891.216	0.464907	0.0901481	5.15715	2.5074e-07	5.13741e-06	ARAP1	ENSG00000186635.14
1.75492	-1.09629	2.2151	-0.494917	0.620659	0.854807	ARAP2	ENSG00000047365.11
5.38921	1.18639	1.04908	1.13089	0.258103	0.506957	ARAP3	ENSG00000120318.15
306.643	-0.216125	0.128858	-1.67723	0.093497	0.252802	ARC	ENSG00000198576.3
1361.44	-0.00183042	0.0610137	-0.0300002	0.976067	1	ARCN1	ENSG00000095139.13
2.3524	0.834628	2.21213	0.377296	0.705953	0.908646	AREG	ENSG00000109321.10
865.967	0.0945488	0.091888	1.02896	0.3035	0.564157	AREL1	ENSG00000119682.16
3092.8	-0.0380735	0.0631411	-0.60299	0.546515	0.800672	ARF1	ENSG00000143761.15
1252.19	0.130479	0.0729102	1.78958	0.0735208	0.213671	ARF3	ENSG00000134287.9
1434.67	-0.0629269	0.0592058	-1.06285	0.28785	0.544243	ARF4	ENSG00000168374.10
876.103	-0.0802992	0.0766246	-1.04796	0.294659	0.552634	ARF5	ENSG00000004059.10
698.303	0.0493365	0.0826138	0.597194	0.550378	0.803907	ARF6	ENSG00000165527.6
1218.42	0.442029	0.0743783	5.94298	2.79893e-09	8.8326e-08	ARFGAP1	ENSG00000101199.12
659.387	-0.0685103	0.0892508	-0.767615	0.442716	0.708962	ARFGAP2	ENSG00000149182.14
327.376	-0.0224256	0.122996	-0.182327	0.855326	0.98899	ARFGAP3	ENSG00000242247.10
729.457	-0.167367	0.0931826	-1.79612	0.0724753	0.211481	ARFGEF1	ENSG00000066777.8
640.775	0.0243172	0.0981436	0.247771	0.804311	0.965971	ARFGEF2	ENSG00000124198.8
0.566766	0	4.14054	0	1	1	ARFGEF3	ENSG00000112379.8
342.375	0.240689	0.111135	2.16573	0.0303319	0.110113	ARFIP1	ENSG00000164144.15
445.04	0.247756	0.10964	2.25973	0.0238378	0.0914634	ARFIP2	ENSG00000132254.12
566.024	0.197752	0.0886174	2.23152	0.0256464	0.0967895	ARFRP1	ENSG00000101246.19
0.161622	0	4.40736	0	1	1	ARG1	ENSG00000118520.14
124.725	0.1231	0.191577	0.642558	0.520511	0.780148	ARG2	ENSG00000081181.7
0						ARGFX	ENSG00000186103.3
1834	-0.550665	0.0713613	-7.71658	1.19497e-14	9.51021e-13	ARGLU1	ENSG00000134884.14
358.502	0.0688118	0.109717	0.627177	0.530543	0.787882	ARHGAP1	ENSG00000175220.11
78.9053	-0.311431	0.241912	-1.28738	0.197963	0.42654	ARHGAP10	ENSG00000071205.11
84.6437	-0.314546	0.21043	-1.49478	0.134971	0.327638	ARHGAP11A	ENSG00000198826.10
0.131556	0	4.40736	0	1	1	ARHGAP11B	ENSG00000285077.1
403.555	0.0640732	0.101598	0.630652	0.528268	0.786019	ARHGAP12	ENSG00000165322.17
257.518	-0.40986	0.142418	-2.87787	0.00400376	0.0223933	ARHGAP15	ENSG00000075884.13
570.016	-0.00609924	0.0888242	-0.0686664	0.945255	1	ARHGAP17	ENSG00000140750.16
14.5471	0.79556	0.577013	1.37875	0.16797	0.38124	ARHGAP18	ENSG00000146376.10
317.747	-0.741186	0.155031	-4.78088	1.74529e-06	2.87911e-05	ARHGAP19	ENSG00000213390.10
20.7675	-1.54409	0.56681	-2.72417	0.00644639	0.0327846	ARHGAP19-SLIT1	ENSG00000269891.2
1.95513	2.03513	2.01023	1.01239	0.311352	0.572814	ARHGAP20	ENSG00000137727.12
694.813	-0.0763778	0.0839558	-0.909738	0.362961	0.630103	ARHGAP21	ENSG00000107863.17
61.5617	-0.737099	0.267885	-2.75155	0.00593141	0.0306722	ARHGAP22	ENSG00000128805.14
43.3689	0.0795945	0.399679	0.199146	0.842148	0.985412	ARHGAP23	ENSG00000275832.4
125.257	-0.749219	0.209586	-3.57476	0.000350546	0.002912	ARHGAP24	ENSG00000138639.17
2.71805	-0.687204	1.42357	-0.482734	0.629284	0.861737	ARHGAP25	ENSG00000163219.11
448.279	0.379697	0.140637	2.69983	0.00693748	0.0347406	ARHGAP26	ENSG00000145819.16
0.269905	-1.08893	4.40736	-0.24707	0.804854	0.965971	ARHGAP27	ENSG00000159314.11
307.536	0.18894	0.132498	1.42599	0.153872	0.359174	ARHGAP28	ENSG00000088756.12
22.2618	0.863159	0.511987	1.6859	0.0918149	0.249702	ARHGAP29	ENSG00000137962.12
13.6145	2.05874	0.898373	2.29164	0.0219266	0.0854795	ARHGAP30	ENSG00000186517.13
210.005	0.0836937	0.171124	0.489081	0.624784	0.858368	ARHGAP31	ENSG00000031081.10
503.623	-0.0143862	0.108681	-0.13237	0.894691	1	ARHGAP32	ENSG00000134909.18
680.391	0.117127	0.0818048	1.43179	0.152204	0.356719	ARHGAP33	ENSG00000004777.18
2152.13	-0.0254417	0.0559154	-0.455004	0.649107	0.8758	ARHGAP35	ENSG00000160007.18
85.2656	0.281331	0.246927	1.13933	0.254566	0.502388	ARHGAP36	ENSG00000147256.11
305.366	-0.434914	0.143888	-3.02258	0.00250633	0.0152036	ARHGAP39	ENSG00000147799.11
26.7092	0.467167	0.422098	1.10677	0.268392	0.519679	ARHGAP4	ENSG00000089820.15
0						ARHGAP40	ENSG00000124143.10
155.377	0.735922	0.198149	3.71398	0.000204028	0.0018411	ARHGAP42	ENSG00000165895.18
6.29344	-0.139116	1.556	-0.0894064	0.928759	1	ARHGAP44	ENSG00000006740.16
57.2539	0.748008	0.311759	2.39931	0.0164259	0.0688739	ARHGAP45	ENSG00000180448.10
277.327	0.314058	0.13751	2.2839	0.0223777	0.0869267	ARHGAP5	ENSG00000100852.12
0.894305	-2.4764	3.17497	-0.779976	0.435405	0.700763	ARHGAP6	ENSG00000047648.21
1.53372	4.42629	2.20027	2.01171	0.0442509	0.146174	ARHGAP8	ENSG00000241484.9
5.35409	2.22815	1.51386	1.47183	0.141067	0.338158	ARHGAP9	ENSG00000123329.17
3420.44	-0.332914	0.0535399	-6.21805	5.03363e-10	1.84963e-08	ARHGDIA	ENSG00000141522.11
3.75547	1.74959	1.76813	0.989515	0.322411	0.585538	ARHGDIB	ENSG00000111348.8
198.079	-0.11272	0.162552	-0.693438	0.488035	0.750927	ARHGDIG	ENSG00000242173.8
686.294	0.196429	0.0878242	2.23662	0.0253113	0.0958129	ARHGEF1	ENSG00000076928.17
0.641465	3.73108	4.27755	0.872248	0.383073	0.650618	ARHGEF10	ENSG00000104728.15
194.982	-0.475197	0.159296	-2.9831	0.0028534	0.0169717	ARHGEF10L	ENSG00000074964.16
707.158	0.000716022	0.0802215	0.00892556	0.992879	1	ARHGEF11	ENSG00000132694.18
2018.98	0.00336533	0.0588568	0.0571783	0.954403	1	ARHGEF12	ENSG00000196914.8
0						ARHGEF15	ENSG00000198844.11
1.58051	-1.9204	2.32964	-0.824336	0.409749	0.675121	ARHGEF16	ENSG00000130762.14
709.149	-0.159547	0.0912619	-1.74823	0.0804236	0.227203	ARHGEF17	ENSG00000110237.4
102.217	0.121477	0.22882	0.530884	0.595499	0.83503	ARHGEF18	ENSG00000104880.17
50.2981	0.674232	0.300202	2.24593	0.0247085	0.0939891	ARHGEF19	ENSG00000142632.16
549.907	-0.19051	0.0969898	-1.96423	0.0495037	0.159018	ARHGEF2	ENSG00000116584.17
494.1	0.317308	0.0940081	3.37533	0.000737269	0.00542028	ARHGEF25	ENSG00000240771.6
0.387512	2.69696	4.30929	0.625847	0.531415	0.787883	ARHGEF26	ENSG00000114790.12
10.1289	0.941	0.882826	1.0659	0.286471	0.542525	ARHGEF28	ENSG00000214944.9
85.5991	-0.154203	0.276029	-0.558647	0.576403	0.822316	ARHGEF3	ENSG00000163947.11
14.706	-0.358941	1.24169	-0.289074	0.772525	0.95445	ARHGEF33	ENSG00000214694.11
0.15687	0.834613	4.40736	0.189368	0.849804	0.985412	ARHGEF35	ENSG00000213214.4
57.1158	0.212103	0.315784	0.671673	0.501792	0.764401	ARHGEF37	ENSG00000183111.11
0.0918546	0	4.40736	0	1	1	ARHGEF38	ENSG00000236699.8
326.717	0.436802	0.134509	3.24738	0.00116474	0.00797097	ARHGEF39	ENSG00000137135.17
319.098	0.140435	0.126126	1.11346	0.265512	0.516063	ARHGEF4	ENSG00000136002.18
636.913	-0.105144	0.108848	-0.965971	0.334059	0.59861	ARHGEF40	ENSG00000165801.9
0.161018	0	4.40736	0	1	1	ARHGEF5	ENSG00000050327.14
166.747	1.01127	0.218476	4.62874	3.67904e-06	5.59921e-05	ARHGEF6	ENSG00000129675.15
857.336	-0.31001	0.0903679	-3.43053	0.000602405	0.00460987	ARHGEF7	ENSG00000102606.18
592.853	0.0815328	0.093814	0.869089	0.384798	0.652265	ARHGEF9	ENSG00000131089.15
956.739	-0.238503	0.0872778	-2.73268	0.00628206	0.032137	ARID1A	ENSG00000117713.19
886.785	-0.131813	0.0668543	-1.97165	0.0486496	0.157172	ARID1B	ENSG00000049618.23
722.599	-0.367365	0.107489	-3.41771	0.000631508	0.00478989	ARID2	ENSG00000189079.15
190.076	-0.550811	0.155958	-3.53178	0.000412772	0.00334877	ARID3A	ENSG00000116017.10
221.307	0.0424937	0.178109	0.238582	0.81143	0.970475	ARID3B	ENSG00000179361.17
0.65225	0	4.19104	0	1	1	ARID3C	ENSG00000205143.2
271.644	0.0802273	0.13558	0.591733	0.554029	0.807196	ARID4A	ENSG00000032219.18
583.83	0.250512	0.109715	2.28329	0.0224131	0.0870436	ARID4B	ENSG00000054267.21
60.1633	0.418056	0.269257	1.55263	0.120512	0.302206	ARID5A	ENSG00000196843.15
244.236	0.356226	0.141344	2.52027	0.0117263	0.0531283	ARID5B	ENSG00000150347.15
692.377	-0.246104	0.0914381	-2.69148	0.00711352	0.0354481	ARIH1	ENSG00000166233.14
1029.38	-0.0699925	0.0821427	-0.852085	0.394167	0.661656	ARIH2	ENSG00000177479.19
22.0546	-0.912074	0.518973	-1.75746	0.0788397	0.224011	ARIH2OS	ENSG00000221883.3
314.382	-0.236257	0.127875	-1.84757	0.0646648	0.193757	ARL1	ENSG00000120805.13
1099.16	-0.418953	0.0779596	-5.37398	7.70184e-08	1.76483e-06	ARL10	ENSG00000175414.6
0						ARL11	ENSG00000152213.3
0						ARL13A	ENSG00000174225.14
151.632	0.111751	0.188233	0.593686	0.552722	0.80594	ARL13B	ENSG00000169379.15
0.161622	0	4.40736	0	1	1	ARL14	ENSG00000179674.3
289.38	0.0347726	0.131138	0.26516	0.790886	0.965017	ARL14EP	ENSG00000152219.4
0.308211	0	4.40736	0	1	1	ARL14EPL	ENSG00000268223.5
134.184	-0.0966468	0.210304	-0.459557	0.645835	0.873915	ARL15	ENSG00000185305.10
359.764	0.508388	0.138868	3.66093	0.000251297	0.00219364	ARL16	ENSG00000214087.8
1.8788	3.51759	2.03994	1.72436	0.0846422	0.235775	ARL17A	ENSG00000185829.17
0.763174	-2.78666	3.20082	-0.870609	0.383968	0.651575	ARL17B	ENSG00000228696.8
241.256	-0.425506	0.138221	-3.07846	0.00208076	0.0130217	ARL2	ENSG00000213465.7
0						ARL2-SNX15	ENSG00000273003.1
367.86	0.111343	0.119993	0.927913	0.353453	0.618934	ARL2BP	ENSG00000102931.7
414.247	-0.422862	0.106008	-3.98897	6.63602e-05	0.00070578	ARL3	ENSG00000138175.8
114.998	0.115329	0.25453	0.453105	0.650473	0.876629	ARL4A	ENSG00000122644.12
513.634	-0.670346	0.110938	-6.04255	1.51696e-09	5.08198e-08	ARL4C	ENSG00000188042.7
96.4465	1.17646	0.272803	4.3125	1.61415e-05	0.000203515	ARL4D	ENSG00000175906.4
319.177	-0.299298	0.126177	-2.37204	0.0176901	0.0728635	ARL5A	ENSG00000162980.16
828.032	-0.0262535	0.0906511	-0.289611	0.772114	0.954394	ARL5B	ENSG00000165997.4
19.898	2.45166	0.641552	3.82145	0.000132669	0.00127699	ARL5C	ENSG00000141748.12
887.546	-0.120009	0.0865484	-1.38661	0.165561	0.377252	ARL6	ENSG00000113966.9
4318.6	0.108182	0.0519706	2.08159	0.0373795	0.128633	ARL6IP1	ENSG00000170540.14
30.8895	-0.124331	0.426054	-0.291821	0.770423	0.952809	ARL6IP4	ENSG00000182196.13
782.846	-0.0542197	0.0715578	-0.757705	0.448627	0.714432	ARL6IP5	ENSG00000144746.6
523.052	0.294152	0.0887761	3.31341	0.000921658	0.00651792	ARL6IP6	ENSG00000177917.10
332.439	-0.314739	0.154532	-2.03672	0.041678	0.140115	ARL8A	ENSG00000143862.7
987.298	0.160416	0.0720417	2.22671	0.0259668	0.0977951	ARL8B	ENSG00000134108.12
0						ARL9	ENSG00000196503.4
484.923	0.00281564	0.106006	0.0265612	0.97881	1	ARMC1	ENSG00000104442.9
130.328	0.573463	0.190495	3.01038	0.00260918	0.015737	ARMC10	ENSG00000170632.13
9.95545	0.274964	0.633026	0.434364	0.664024	0.88647	ARMC12	ENSG00000157343.8
12.7322	-0.236369	0.551724	-0.428419	0.668346	0.888387	ARMC2	ENSG00000118690.12
3.69684	-1.19513	1.11028	-1.07642	0.281739	0.536404	ARMC3	ENSG00000165309.13
0						ARMC4	ENSG00000169126.15
146.463	-1.36254	0.219218	-6.21545	5.1179e-10	1.87637e-08	ARMC5	ENSG00000140691.16
574.074	-0.49414	0.175992	-2.80773	0.00498914	0.0266949	ARMC6	ENSG00000105676.13
158.33	0.771088	0.20619	3.7397	0.00018424	0.00169813	ARMC7	ENSG00000125449.6
506.489	-0.24484	0.0920193	-2.66075	0.00779672	0.0380963	ARMC8	ENSG00000114098.17
427.463	0.27481	0.108018	2.54412	0.0109554	0.0503629	ARMC9	ENSG00000135931.17
312.804	-0.014676	0.127298	-0.115288	0.908217	1	ARMCX1	ENSG00000126947.12
454.476	-0.174134	0.0872462	-1.9959	0.0459453	0.15025	ARMCX2	ENSG00000184867.13
754.415	0.198673	0.0956885	2.07624	0.0378716	0.129969	ARMCX3	ENSG00000102401.19
408.639	-0.052276	0.11222	-0.465836	0.641333	0.870912	ARMCX4	ENSG00000196440.11
104.828	-0.0512446	0.198451	-0.258223	0.796235	0.965971	ARMCX5	ENSG00000125962.14
102.385	-0.274251	0.208591	-1.31478	0.188585	0.412103	ARMCX6	ENSG00000198960.10
32.5674	0.215931	0.395635	0.545782	0.585216	0.829378	ARMH1	ENSG00000198520.11
0						ARMH2	ENSG00000260286.3
312.815	0.26661	0.119286	2.23504	0.0254145	0.0960998	ARMH3	ENSG00000120029.12
18.0439	-0.064773	0.503321	-0.128691	0.897602	1	ARMH4	ENSG00000139971.15
0						ARMS2	ENSG00000254636.1
116.137	0.0343589	0.191901	0.179045	0.857903	0.990664	ARMT1	ENSG00000146476.10
431.187	-0.322086	0.105741	-3.046	0.00231907	0.0142615	ARNT	ENSG00000143437.20
669.936	-0.252124	0.0973655	-2.58946	0.00961274	0.0452226	ARNT2	ENSG00000172379.20
145.986	0.655449	0.179923	3.64295	0.000269531	0.00232667	ARNTL	ENSG00000133794.17
58.5898	0.48552	0.340938	1.42407	0.154426	0.359686	ARNTL2	ENSG00000029153.14
304.332	-0.161092	0.113799	-1.41558	0.156897	0.363759	ARPC1A	ENSG00000241685.9
147.526	-0.427369	0.204518	-2.08965	0.0366497	0.12694	ARPC1B	ENSG00000130429.14
1243.38	-0.191173	0.0653504	-2.92535	0.00344071	0.0197938	ARPC2	ENSG00000163466.15
975.771	-0.380622	0.0841315	-4.52414	6.0643e-06	8.58845e-05	ARPC3	ENSG00000111229.15
476.804	0.0116087	0.104605	0.110977	0.911635	1	ARPC4	ENSG00000241553.12
9.04739	-0.287328	0.843919	-0.340469	0.733503	0.927467	ARPC4-TTLL3	ENSG00000250151.9
831.235	0.120359	0.0936747	1.28486	0.19884	0.427264	ARPC5	ENSG00000162704.15
398.152	0.117531	0.114718	1.02452	0.305591	0.565832	ARPC5L	ENSG00000136950.13
370.195	0.0209187	0.0989434	0.211421	0.832558	0.983078	ARPIN	ENSG00000242498.7
2950.41	-0.0926259	0.0526906	-1.75792	0.078761	0.223865	ARPP19	ENSG00000128989.10
25.7822	-0.490096	0.546889	-0.896153	0.370171	0.638003	ARPP21	ENSG00000172995.16
0						ARR3	ENSG00000120500.17
296.644	-0.0920748	0.126008	-0.730708	0.464958	0.729402	ARRB1	ENSG00000137486.16
527.08	0.22417	0.109464	2.04789	0.0405712	0.137185	ARRB2	ENSG00000141480.17
177.87	0.469369	0.173996	2.69759	0.00698437	0.0349219	ARRDC1	ENSG00000197070.13
50.8101	0.341581	0.296541	1.15188	0.24937	0.495912	ARRDC2	ENSG00000105643.9
815.524	0.468914	0.08035	5.8359	5.35013e-09	1.56992e-07	ARRDC3	ENSG00000113369.8
425.544	-0.165357	0.115447	-1.43232	0.152053	0.356589	ARRDC4	ENSG00000140450.8
0						ARRDC5	ENSG00000205784.2
191.038	0.436343	0.172177	2.53427	0.0112681	0.0514957	ARSA	ENSG00000100299.17
673.603	0.287165	0.109353	2.62603	0.00863863	0.0413771	ARSB	ENSG00000113273.16
195.65	1.10882	0.180375	6.1473	7.88109e-10	2.77711e-08	ARSD	ENSG00000006756.15
0.250388	0	4.40736	0	1	1	ARSE	ENSG00000157399.14
6.73772	-0.392287	1.28207	-0.30598	0.75962	0.944961	ARSF	ENSG00000062096.14
45.8693	0.821917	0.372317	2.20757	0.027274	0.101523	ARSG	ENSG00000141337.12
0						ARSH	ENSG00000205667.2
0.460447	0	4.40736	0	1	1	ARSI	ENSG00000183876.8
1.87218	2.76905	2.071	1.33706	0.181203	0.40124	ARSJ	ENSG00000180801.13
107.872	-0.0534896	0.248551	-0.215206	0.829607	0.981511	ARSK	ENSG00000164291.16
0						ART1	ENSG00000129744.2
0						ART3	ENSG00000156219.16
0.0801831	0.834622	4.40736	0.18937	0.849803	0.985412	ART4	ENSG00000111339.11
3.5199	3.56845	1.60782	2.21943	0.0264575	0.0992994	ART5	ENSG00000167311.13
1.88266	0.755384	1.90535	0.396454	0.69177	0.902409	ARTN	ENSG00000117407.16
114.427	-0.31513	0.203375	-1.5495	0.121262	0.303439	ARV1	ENSG00000173409.13
1635.26	-0.607248	0.0581143	-10.4492	1.47748e-25	4.30448e-23	ARVCF	ENSG00000099889.13
0.702455	-2.3369	3.1086	-0.751752	0.4522	0.718629	ARX	ENSG00000004848.7
36.8908	-0.00688906	0.778909	-0.0088445	0.992943	1	AS3MT	ENSG00000214435.7
525.298	-0.0209484	0.106148	-0.19735	0.843554	0.985412	ASAH1	ENSG00000104763.18
30.1657	-0.776167	0.418325	-1.85542	0.0635368	0.191183	ASAH2	ENSG00000188611.14
115.114	0.0600399	0.210592	0.2851	0.775568	0.955879	ASAH2B	ENSG00000204147.10
743.298	-0.240997	0.0831951	-2.89677	0.00377024	0.0213433	ASAP1	ENSG00000153317.14
716.98	-0.192823	0.0822822	-2.34344	0.0191068	0.077046	ASAP2	ENSG00000151693.10
136.054	0.00505151	0.207531	0.024341	0.980581	1	ASAP3	ENSG00000088280.18
888.786	0.138804	0.0791948	1.75269	0.0796551	0.225699	ASB1	ENSG00000065802.11
0.4788	0	4.40736	0	1	1	ASB10	ENSG00000146926.10
0						ASB11	ENSG00000165192.13
3.04198	2.10339	1.74967	1.20216	0.229301	0.469862	ASB12	ENSG00000198881.9
322.416	-0.106221	0.141352	-0.751465	0.452373	0.718744	ASB13	ENSG00000196372.12
5.70764	2.00917	0.992186	2.02499	0.0428681	0.14303	ASB14	ENSG00000239388.8
0						ASB15	ENSG00000146809.12
72.9616	0.740628	0.307344	2.40977	0.0159627	0.067347	ASB16	ENSG00000161664.6
0						ASB17	ENSG00000154007.6
2.15162	-0.870529	3.51986	-0.247319	0.804661	0.965971	ASB18	ENSG00000182177.14
0						ASB2	ENSG00000100628.11
16.6823	0.709555	0.52914	1.34096	0.179934	0.399187	ASB3	ENSG00000115239.21
0.0834625	0	4.40736	0	1	1	ASB4	ENSG00000005981.12
2.79346	4.42444	1.84304	2.40062	0.0163674	0.0687316	ASB5	ENSG00000164122.8
519.797	0.281751	0.124108	2.27022	0.0231945	0.0893973	ASB6	ENSG00000148331.11
189.869	-0.247618	0.155003	-1.5975	0.110154	0.284225	ASB7	ENSG00000183475.12
190.328	-0.232743	0.16322	-1.42594	0.153884	0.359174	ASB8	ENSG00000177981.10
0.162149	-1.88714	4.37641	-0.431207	0.666318	0.887118	ASB9	ENSG00000102048.15
265.598	-0.126402	0.136036	-0.92918	0.352796	0.618378	ASCC1	ENSG00000138303.17
570.914	0.224833	0.0996754	2.25565	0.0240924	0.0921828	ASCC2	ENSG00000100325.14
542.267	0.179084	0.101613	1.76241	0.0780002	0.222623	ASCC3	ENSG00000112249.13
2407.07	-0.155229	0.106744	-1.45421	0.145887	0.345999	ASCL1	ENSG00000139352.3
9.33376	-2.06364	0.832583	-2.4786	0.0131897	0.0581358	ASCL2	ENSG00000183734.4
0						ASCL3	ENSG00000176009.3
0						ASCL4	ENSG00000187855.5
5.83888	2.3221	1.44658	1.60524	0.108442	0.280919	ASCL5	ENSG00000232237.3
150.851	-0.524352	0.166302	-3.15301	0.00161594	0.0104828	ASF1A	ENSG00000111875.7
596.485	0.633076	0.107212	5.90488	3.52895e-09	1.08427e-07	ASF1B	ENSG00000105011.8
8.92411	-0.831917	0.69269	-1.201	0.229753	0.470552	ASGR1	ENSG00000141505.11
0						ASGR2	ENSG00000161944.16
1060.54	0.113288	0.0690707	1.64017	0.10097	0.266601	ASH1L	ENSG00000116539.12
528.572	0.485945	0.0950877	5.1105	3.21311e-07	6.44795e-06	ASH2L	ENSG00000129691.15
774.679	0.111642	0.0874835	1.27614	0.201905	0.43184	ASIC1	ENSG00000110881.11
78.6684	-0.0384684	0.26765	-0.143726	0.885717	1	ASIC2	ENSG00000108684.14
134.255	-1.00768	0.179332	-5.61909	1.91963e-08	5.0271e-07	ASIC3	ENSG00000213199.7
1.63685	2.75888	2.48807	1.10884	0.267499	0.518811	ASIC4	ENSG00000072182.12
0						ASIC5	ENSG00000256394.2
0						ASIP	ENSG00000101440.9
121.415	0.700517	0.21429	3.26902	0.00107922	0.00747032	ASL	ENSG00000126522.16
0						ASMT	ENSG00000196433.12
0						ASMTL	ENSG00000169093.15
511.698	-0.0884739	0.0934675	-0.946574	0.343856	0.609247	ASNA1	ENSG00000198356.11
64.7231	0.213463	0.254492	0.838781	0.401592	0.668837	ASNS	ENSG00000070669.16
517.428	0.0636842	0.102064	0.623964	0.532651	0.788728	ASNSD1	ENSG00000138381.9
1.7666	-0.137113	2.20584	-0.0621593	0.950436	1	ASPA	ENSG00000108381.10
33.9508	-0.488011	0.436976	-1.11679	0.264083	0.514624	ASPDH	ENSG00000204653.9
1.13856	-0.142047	2.51067	-0.0565774	0.954882	1	ASPG	ENSG00000166183.15
575.258	0.0533565	0.0864594	0.617127	0.537151	0.791932	ASPH	ENSG00000198363.17
422.282	0.128713	0.116224	1.10745	0.268098	0.519306	ASPHD1	ENSG00000174939.10
191.285	-0.0481717	0.17087	-0.281919	0.778005	0.957301	ASPHD2	ENSG00000128203.6
2022.23	-0.0788279	0.0550336	-1.43236	0.152041	0.356589	ASPM	ENSG00000066279.17
0						ASPN	ENSG00000106819.11
9.24401	0.602668	1.52938	0.39406	0.693537	0.903674	ASPRV1	ENSG00000244617.2
352.082	-0.89191	0.106274	-8.39256	4.75649e-17	5.42672e-15	ASPSCR1	ENSG00000169696.15
401.464	0.460271	0.106698	4.31378	1.60483e-05	0.000202497	ASRGL1	ENSG00000162174.12
7765.5	-0.263097	0.0584216	-4.50342	6.68684e-06	9.35641e-05	ASS1	ENSG00000130707.17
98.0335	-0.0934419	0.205842	-0.45395	0.649865	0.876533	ASTE1	ENSG00000034533.11
0.538639	0.834589	4.40736	0.189363	0.849809	0.985412	ASTL	ENSG00000188886.3
373.13	0.26644	0.138035	1.93023	0.0535779	0.16836	ASTN1	ENSG00000152092.15
1756.56	-0.239243	0.0617534	-3.87416	0.000106993	0.00106309	ASTN2	ENSG00000148219.16
2142.79	-0.265531	0.0574293	-4.62362	3.77109e-06	5.70736e-05	ASXL1	ENSG00000171456.18
454.602	0.0748193	0.113067	0.661725	0.508147	0.770128	ASXL2	ENSG00000143970.16
150.249	-0.303658	0.177409	-1.71163	0.0869648	0.240482	ASXL3	ENSG00000141431.11
0						ASZ1	ENSG00000154438.7
1161.11	0.0352633	0.0822471	0.428748	0.668106	0.888358	ATAD1	ENSG00000138138.13
1444.78	0.253049	0.066873	3.78403	0.000154311	0.00145778	ATAD2	ENSG00000156802.12
265.233	-0.0952007	0.134704	-0.706739	0.479729	0.742649	ATAD2B	ENSG00000119778.14
282.525	0.0412849	0.130789	0.31566	0.752261	0.940144	ATAD3A	ENSG00000197785.13
310.551	0.103072	0.127376	0.809193	0.418404	0.684612	ATAD3B	ENSG00000160072.19
0.860843	-3.43134	3.69033	-0.929821	0.352464	0.618261	ATAD3C	ENSG00000215915.9
318.812	-0.196997	0.123212	-1.59884	0.109856	0.283637	ATAD5	ENSG00000176208.8
0						ATAT1	ENSG00000137343.17
1905.89	-0.0308579	0.0706774	-0.436602	0.6624	0.884881	ATCAY	ENSG00000167654.17
597.273	-0.301082	0.0966	-3.11679	0.00182831	0.0116564	ATE1	ENSG00000107669.17
191.849	-0.125713	0.144794	-0.86822	0.385274	0.65259	ATF1	ENSG00000123268.8
838.148	0.153722	0.0845543	1.81803	0.0690603	0.203599	ATF2	ENSG00000115966.16
420.83	0.798316	0.134778	5.92319	3.15758e-09	9.81257e-08	ATF3	ENSG00000162772.16
2937.16	-0.150517	0.0613151	-2.45481	0.0140958	0.0611632	ATF4	ENSG00000128272.14
175.148	0.553066	0.341425	1.61988	0.105259	0.275018	ATF5	ENSG00000169136.10
629.863	0.144552	0.0991142	1.45844	0.144719	0.344383	ATF6	ENSG00000118217.5
8.57439	3.34329	2.40049	1.39276	0.163693	0.374055	ATF6B	ENSG00000213676.12
298.546	-0.22665	0.127719	-1.7746	0.0759634	0.218733	ATF7	ENSG00000170653.18
1573.97	-0.296319	0.0623685	-4.75109	2.02321e-06	3.28409e-05	ATF7IP	ENSG00000171681.12
0.738471	-4.05838	3.77732	-1.07441	0.28264	0.537507	ATF7IP2	ENSG00000166669.13
136.371	-0.232418	0.208904	-1.11256	0.265897	0.51674	ATG10	ENSG00000152348.15
198.697	0.0818234	0.152886	0.535193	0.592517	0.83292	ATG101	ENSG00000123395.14
575.533	-0.191179	0.085544	-2.23486	0.0254265	0.0961154	ATG12	ENSG00000145782.12
694.735	0.302767	0.091146	3.32178	0.000894439	0.00636128	ATG13	ENSG00000175224.16
227.641	-0.240138	0.161474	-1.48716	0.136971	0.331244	ATG14	ENSG00000126775.8
482.689	0.133776	0.21642	0.618133	0.536488	0.791392	ATG16L1	ENSG00000085978.21
395.052	0.416572	0.130418	3.19413	0.00140253	0.00932069	ATG16L2	ENSG00000168010.10
418.405	0.788258	0.120144	6.56096	5.34638e-11	2.36385e-09	ATG2A	ENSG00000110046.12
757.046	-0.0119921	0.0977197	-0.122719	0.90233	1	ATG2B	ENSG00000066739.11
362.22	-0.14805	0.110111	-1.34454	0.178773	0.397205	ATG3	ENSG00000144848.10
83.6418	0.0845422	0.237025	0.356681	0.721331	0.918196	ATG4A	ENSG00000101844.17
1350.91	0.370153	0.0791194	4.67841	2.89109e-06	4.53105e-05	ATG4B	ENSG00000168397.16
143.111	0.221127	0.186153	1.18788	0.234881	0.47728	ATG4C	ENSG00000125703.14
344.272	0.367431	0.148453	2.47507	0.0133211	0.0585792	ATG4D	ENSG00000130734.9
121.734	0.233156	0.199032	1.17145	0.241418	0.485964	ATG5	ENSG00000057663.15
485.748	-0.450104	0.0998019	-4.50998	6.48351e-06	9.0875e-05	ATG7	ENSG00000197548.12
379.104	0.13238	0.136029	0.973177	0.330466	0.594814	ATG9A	ENSG00000198925.11
95.2874	0.417604	0.241018	1.73267	0.0831546	0.233024	ATG9B	ENSG00000181652.19
1068.41	-0.299406	0.0714545	-4.19016	2.78763e-05	0.000329805	ATIC	ENSG00000138363.14
322.628	-0.0587668	0.123565	-0.475596	0.634363	0.865157	ATL1	ENSG00000198513.11
637.514	0.211118	0.0971665	2.17275	0.0297992	0.108764	ATL2	ENSG00000119787.13
275.916	-0.0140766	0.136872	-0.102845	0.918086	1	ATL3	ENSG00000184743.12
908.845	-0.177059	0.0799609	-2.21432	0.0268066	0.100309	ATM	ENSG00000149311.18
480.35	0.149096	0.09939	1.50011	0.133586	0.325097	ATMIN	ENSG00000166454.9
2061.31	-0.0775379	0.0763625	-1.01539	0.309919	0.571207	ATN1	ENSG00000111676.14
0.0918546	0	4.40736	0	1	1	ATOH1	ENSG00000172238.4
4.53223	0.0987225	1.10287	0.0895144	0.928673	1	ATOH7	ENSG00000179774.8
185.801	-0.719514	0.188776	-3.81147	0.000138144	0.00132189	ATOH8	ENSG00000168874.12
125.045	0.328005	0.191367	1.71401	0.0865277	0.239515	ATOX1	ENSG00000177556.11
26.8494	0.372743	0.382727	0.973913	0.3301	0.594369	ATP10A	ENSG00000206190.11
0.197335	0	4.40736	0	1	1	ATP10B	ENSG00000118322.13
253.828	0.815253	0.159191	5.12121	3.03585e-07	6.12994e-06	ATP10D	ENSG00000145246.13
1081.08	0.057601	0.0748287	0.769771	0.441436	0.707468	ATP11A	ENSG00000068650.18
379.394	0.2484	0.122842	2.0221	0.0431655	0.143636	ATP11B	ENSG00000058063.15
1019.88	-0.31223	0.0633948	-4.92516	8.42925e-07	1.52022e-05	ATP11C	ENSG00000101974.14
2.30611	-2.55634	2.0884	-1.22407	0.220927	0.458754	ATP12A	ENSG00000075673.11
1289.75	0.0470531	0.0752584	0.625221	0.531826	0.788079	ATP13A1	ENSG00000105726.16
375.388	0.189636	0.113963	1.66401	0.0961109	0.257437	ATP13A2	ENSG00000159363.17
1632.7	-0.0753526	0.056807	-1.32647	0.184685	0.406576	ATP13A3	ENSG00000133657.15
4.59988	0.834633	1.88794	0.442086	0.658427	0.881957	ATP13A4	ENSG00000127249.14
0						ATP13A5	ENSG00000187527.10
3337.34	-0.0861903	0.0511795	-1.68408	0.0921662	0.250085	ATP1A1	ENSG00000163399.15
0						ATP1A2	ENSG00000018625.14
440.573	-0.050639	0.109366	-0.463023	0.643348	0.872431	ATP1A3	ENSG00000105409.18
0						ATP1A4	ENSG00000132681.16
5347.95	-0.186064	0.0545051	-3.4137	0.000640874	0.00484965	ATP1B1	ENSG00000143153.12
14.3054	2.0021	0.699057	2.86401	0.00418321	0.0232139	ATP1B2	ENSG00000129244.8
1130.18	0.258601	0.0735728	3.51489	0.000439929	0.00353568	ATP1B3	ENSG00000069849.10
0						ATP1B4	ENSG00000101892.11
0.936934	0.36002	2.77896	0.129552	0.896921	1	ATP23	ENSG00000166896.8
38.2097	0.836636	0.3948	2.11914	0.034079	0.119853	ATP2A1	ENSG00000196296.13
4871.66	0.00542917	0.0459094	0.118258	0.905863	1	ATP2A2	ENSG00000174437.16
45.0088	1.11029	0.381581	2.90972	0.00361758	0.0205934	ATP2A3	ENSG00000074370.17
823.504	0.135463	0.0812859	1.6665	0.0956146	0.256666	ATP2B1	ENSG00000070961.15
197.352	0.479129	0.160729	2.98097	0.00287334	0.0170592	ATP2B2	ENSG00000157087.18
119.804	0.470974	0.189787	2.48159	0.0130798	0.0578178	ATP2B3	ENSG00000067842.17
120.583	0.156705	0.198482	0.789517	0.42981	0.695766	ATP2B4	ENSG00000058668.14
2224.85	0.140378	0.0530749	2.64491	0.00817129	0.0396063	ATP2C1	ENSG00000017260.19
3.50457	4.41275	1.78702	2.46934	0.0135364	0.0593037	ATP2C2	ENSG00000064270.12
0.495472	0	4.40736	0	1	1	ATP4A	ENSG00000105675.8
0						ATP4B	ENSG00000186009.4
4212.68	-0.125694	0.056868	-2.21028	0.0270861	0.101031	ATP5F1A	ENSG00000152234.15
6023.3	0.0494132	0.0421116	1.17339	0.240641	0.484835	ATP5F1B	ENSG00000110955.8
1116.37	-0.0105075	0.0660037	-0.159196	0.873514	1	ATP5F1C	ENSG00000165629.19
663.769	-0.417852	0.0910527	-4.58912	4.45109e-06	6.55412e-05	ATP5F1D	ENSG00000099624.7
915.454	-0.055044	0.0867763	-0.634321	0.525871	0.784659	ATP5F1E	ENSG00000124172.9
248.09	0.22024	0.130056	1.69342	0.0903759	0.246817	ATP5IF1	ENSG00000130770.17
512.568	-0.249569	0.104918	-2.3787	0.017374	0.0719377	ATP5MC1	ENSG00000159199.13
802.545	-0.564843	0.102743	-5.49764	3.84912e-08	9.44336e-07	ATP5MC2	ENSG00000135390.18
980.954	-0.0721585	0.0735212	-0.981465	0.326364	0.589529	ATP5MC3	ENSG00000154518.9
249.679	-0.0195628	0.157938	-0.123864	0.901423	1	ATP5MD	ENSG00000173915.15
120.66	-0.140112	0.256191	-0.546903	0.584445	0.828514	ATP5ME	ENSG00000169020.9
291.035	-0.17609	0.134717	-1.30711	0.191174	0.416145	ATP5MF	ENSG00000241468.7
0.56191	3.31604	4.28767	0.773389	0.439292	0.70521	ATP5MF-PTCD1	ENSG00000248919.7
608.632	0.00338995	0.098234	0.034509	0.972471	1	ATP5MG	ENSG00000167283.7
0.323244	0	4.40736	0	1	1	ATP5MGL	ENSG00000249222.1
376.318	-0.238194	0.114881	-2.0734	0.0381355	0.130655	ATP5MPL	ENSG00000156411.9
1228.7	-0.187759	0.0707605	-2.65345	0.00796745	0.0387911	ATP5PB	ENSG00000116459.10
579.356	0.0244473	0.232413	0.105189	0.916225	1	ATP5PD	ENSG00000167863.11
454.761	-0.160901	0.0985948	-1.63194	0.102691	0.270065	ATP5PF	ENSG00000154723.12
552.306	0.0324497	0.107562	0.301685	0.762893	0.947013	ATP5PO	ENSG00000241837.6
171.653	-0.660377	0.195577	-3.37656	0.000733974	0.00540134	ATP5S	ENSG00000125375.14
1861.1	0.356752	0.0689328	5.17536	2.27471e-07	4.69177e-06	ATP6AP1	ENSG00000071553.16
140.2	0.29024	0.196202	1.47929	0.139062	0.334829	ATP6AP1L	ENSG00000205464.12
825.85	0.125321	0.0933531	1.34244	0.179454	0.398393	ATP6AP2	ENSG00000182220.14
1858.98	-0.0692234	0.0619332	-1.11771	0.26369	0.514114	ATP6V0A1	ENSG00000033627.16
490.647	0.0413702	0.110448	0.374567	0.707983	0.910067	ATP6V0A2	ENSG00000185344.13
0.241829	0	4.40736	0	1	1	ATP6V0A4	ENSG00000105929.16
930.935	0.076922	0.0781003	0.984912	0.324667	0.58731	ATP6V0B	ENSG00000117410.13
627.958	0.185916	0.108861	1.70783	0.0876684	0.241851	ATP6V0C	ENSG00000185883.11
661.793	0.12454	0.0962563	1.29384	0.19572	0.42316	ATP6V0D1	ENSG00000159720.11
0						ATP6V0D2	ENSG00000147614.3
340.577	-0.0802611	0.118364	-0.67809	0.497715	0.760248	ATP6V0E1	ENSG00000113732.8
717.269	0.400267	0.155194	2.57914	0.0099046	0.0462948	ATP6V0E2	ENSG00000171130.18
855.059	0.28547	0.0858038	3.32701	0.000877842	0.00627882	ATP6V1A	ENSG00000114573.9
4.19846	-0.345743	1.13108	-0.305674	0.759852	0.945109	ATP6V1B1	ENSG00000116039.12
1678.12	0.30107	0.0607615	4.95495	7.23472e-07	1.32326e-05	ATP6V1B2	ENSG00000147416.10
586.62	-0.202041	0.083055	-2.43262	0.0149901	0.0641971	ATP6V1C1	ENSG00000155097.11
588.352	-0.336336	0.0832686	-4.03917	5.36402e-05	0.000587737	ATP6V1C2	ENSG00000143882.11
418.943	0.216642	0.119442	1.81378	0.069712	0.205113	ATP6V1D	ENSG00000100554.11
686.089	-0.0352295	0.0962472	-0.366032	0.714341	0.91379	ATP6V1E1	ENSG00000131100.12
116.069	0.238859	0.228565	1.04504	0.296006	0.554522	ATP6V1E2	ENSG00000250565.6
384.247	-0.0882163	0.110984	-0.794853	0.426699	0.69311	ATP6V1F	ENSG00000128524.4
11.2455	-0.424693	0.735441	-0.577467	0.563624	0.814268	ATP6V1FNB	ENSG00000272899.3
584.287	-0.0949885	0.102338	-0.928185	0.353312	0.618934	ATP6V1G1	ENSG00000136888.6
0						ATP6V1G2	ENSG00000213760.10
0						ATP6V1G2-DDX39B	ENSG00000254870.5
0						ATP6V1G3	ENSG00000151418.11
390.682	0.287461	0.123007	2.33694	0.0194421	0.0780698	ATP6V1H	ENSG00000047249.17
262.052	-0.163563	0.138639	-1.17978	0.238089	0.481401	ATP7A	ENSG00000165240.19
219.79	0.0999258	0.146332	0.682869	0.49469	0.757046	ATP7B	ENSG00000123191.14
496.252	-0.530707	0.115854	-4.58081	4.63176e-06	6.79561e-05	ATP8A1	ENSG00000124406.16
226.45	0.208431	0.151926	1.37193	0.170087	0.384664	ATP8A2	ENSG00000132932.16
3.34812	-2.60873	1.66765	-1.56432	0.117743	0.297641	ATP8B1	ENSG00000081923.13
678.865	-0.165231	0.0780142	-2.11796	0.0341782	0.120176	ATP8B2	ENSG00000143515.16
5.60166	2.16066	1.32271	1.63351	0.102362	0.269404	ATP8B3	ENSG00000130270.16
5.77654	0.919046	1.05353	0.872353	0.383016	0.650618	ATP8B4	ENSG00000104043.14
1813.18	-0.135097	0.0533487	-2.53233	0.0113306	0.0517377	ATP9A	ENSG00000054793.13
185.76	0.251275	0.182847	1.37424	0.169368	0.383585	ATP9B	ENSG00000166377.20
883.384	0.0488904	0.0930332	0.525516	0.599225	0.836801	ATPAF1	ENSG00000123472.12
135.824	-0.050978	0.192361	-0.265012	0.791	0.965017	ATPAF2	ENSG00000171953.15
430.111	-0.138457	0.10026	-1.38098	0.167286	0.380016	ATR	ENSG00000175054.14
416.157	-0.0262998	0.120037	-0.219097	0.826574	0.980055	ATRAID	ENSG00000138085.16
291.659	0.378683	0.126797	2.98652	0.0028217	0.0168199	ATRIP	ENSG00000164053.20
856.525	-0.0610997	0.145492	-0.419951	0.674521	0.892658	ATRN	ENSG00000088812.17
382.418	0.437523	0.120327	3.63612	0.000276775	0.00237913	ATRNL1	ENSG00000107518.17
1640.12	0.1419	0.076056	1.86572	0.06208	0.187917	ATRX	ENSG00000085224.22
420.374	0.197791	0.117331	1.68575	0.0918431	0.249737	ATXN1	ENSG00000124788.18
1827.19	-0.0949699	0.0577207	-1.64533	0.0999008	0.264634	ATXN10	ENSG00000130638.16
683.914	0.352569	0.0795273	4.43331	9.27971e-06	0.000124916	ATXN1L	ENSG00000224470.7
773.509	-0.234589	0.0791057	-2.96551	0.00302182	0.0177661	ATXN2	ENSG00000204842.15
2839.38	-0.109485	0.0649746	-1.68504	0.0919813	0.249904	ATXN2L	ENSG00000168488.18
231.265	-0.179397	0.186336	-0.962763	0.335667	0.60068	ATXN3	ENSG00000066427.22
0						ATXN3L	ENSG00000123594.5
10.7271	1.54459	0.966175	1.59866	0.109895	0.283693	ATXN7	ENSG00000163635.18
57.8275	0.293389	0.288834	1.01577	0.309739	0.571033	ATXN7L1	ENSG00000146776.14
218.97	-0.12047	0.145449	-0.82826	0.407523	0.673382	ATXN7L2	ENSG00000162650.16
1012.71	-0.376793	0.077877	-4.83831	1.30951e-06	2.23713e-05	ATXN7L3	ENSG00000087152.15
2030.64	-0.128055	0.0689811	-1.85637	0.0634002	0.190844	ATXN7L3B	ENSG00000253719.3
95.9017	0.576713	0.264467	2.18066	0.0292085	0.106967	AUH	ENSG00000148090.11
37.4361	0.352302	0.314943	1.11862	0.263302	0.513663	AUNIP	ENSG00000127423.10
1450.74	0.147573	0.0693118	2.12912	0.0332446	0.117859	AUP1	ENSG00000115307.16
562.29	-0.0195878	0.0928098	-0.211053	0.832846	0.983133	AURKA	ENSG00000087586.17
392.004	0.0873239	0.114304	0.763959	0.444892	0.710703	AURKAIP1	ENSG00000175756.13
594.423	-0.436654	0.100735	-4.33468	1.4597e-05	0.000186784	AURKB	ENSG00000178999.12
2.63245	2.73095	1.88838	1.44618	0.148126	0.349938	AURKC	ENSG00000105146.12
1303.15	-0.305932	0.0719507	-4.25197	2.11898e-05	0.000258573	AUTS2	ENSG00000158321.16
99.6882	-0.189598	0.207438	-0.913998	0.360718	0.627544	AVEN	ENSG00000169857.7
13.0572	0.460846	0.727709	0.633284	0.526548	0.784847	AVIL	ENSG00000135407.10
746.256	-0.106386	0.0844063	-1.2604	0.207524	0.44033	AVL9	ENSG00000105778.18
0						AVP	ENSG00000101200.5
23.9858	-0.0708194	0.466945	-0.151665	0.879451	1	AVPI1	ENSG00000119986.6
0						AVPR1A	ENSG00000166148.3
0.242433	0	4.40736	0	1	1	AVPR1B	ENSG00000198049.6
1.76307	1.21478	2.00742	0.605146	0.545082	0.799516	AVPR2	ENSG00000126895.14
0						AWAT1	ENSG00000204195.3
0						AWAT2	ENSG00000147160.9
1.0655	2.72347	2.74424	0.992432	0.320987	0.58441	AXDND1	ENSG00000162779.21
298.318	0.0298668	0.131801	0.226605	0.820731	0.976177	AXIN1	ENSG00000103126.14
170.395	0.0254194	0.182355	0.139395	0.889138	1	AXIN2	ENSG00000168646.12
1.56447	1.70924	2.35537	0.725676	0.468037	0.731976	AXL	ENSG00000167601.11
2.57268	-2.90955	2.0558	-1.41529	0.156984	0.363838	AZGP1	ENSG00000160862.12
691.902	0.445252	0.0928198	4.79696	1.61096e-06	2.68191e-05	AZI2	ENSG00000163512.13
2261.4	0.0403667	0.0671541	0.601106	0.54777	0.801512	AZIN1	ENSG00000155096.13
25.9794	2.62603	0.506433	5.18535	2.15612e-07	4.47547e-06	AZIN2	ENSG00000142920.16
0						AZU1	ENSG00000172232.9
664.706	0.268	0.116316	2.30406	0.0212191	0.0835197	B2M	ENSG00000166710.18
575.533	-0.070302	0.0909233	-0.773201	0.439404	0.70532	B3GALNT1	ENSG00000169255.14
125.453	-0.023748	0.178139	-0.133312	0.893947	1	B3GALNT2	ENSG00000162885.12
24.7029	-0.635566	0.449087	-1.41524	0.156998	0.363838	B3GALT1	ENSG00000172318.5
23.1503	-0.179156	0.57115	-0.313676	0.753767	0.941416	B3GALT2	ENSG00000162630.5
0						B3GALT4	ENSG00000235863.3
58.1405	-0.946074	0.306879	-3.08289	0.00204998	0.0128735	B3GALT5	ENSG00000183778.17
256.842	0.0204958	0.137282	0.149297	0.881319	1	B3GALT6	ENSG00000176022.5
426.583	0.43506	0.110633	3.93246	8.40803e-05	0.000864379	B3GAT1	ENSG00000109956.12
404.631	-0.130514	0.102998	-1.26716	0.2051	0.436499	B3GAT2	ENSG00000112309.10
508.184	0.733582	0.100809	7.27692	3.41521e-13	2.15966e-11	B3GAT3	ENSG00000149541.9
135.696	-0.0609835	0.221743	-0.275019	0.783301	0.960653	B3GLCT	ENSG00000187676.7
34.5511	0.591138	0.368752	1.60308	0.108918	0.281794	B3GNT10	ENSG00000214654.8
197.804	-0.351139	0.188545	-1.86236	0.0625519	0.189023	B3GNT2	ENSG00000170340.10
0.161622	0	4.40736	0	1	1	B3GNT3	ENSG00000179913.10
307.462	0.339375	0.164839	2.05882	0.0395113	0.134409	B3GNT4	ENSG00000176383.8
201.047	-0.375796	0.162969	-2.30593	0.0211145	0.0831885	B3GNT5	ENSG00000176597.11
0						B3GNT6	ENSG00000198488.10
89.9028	-0.169642	0.257767	-0.658119	0.510462	0.771682	B3GNT7	ENSG00000156966.6
0.31234	0.769326	4.3678	0.176136	0.860187	0.991731	B3GNT8	ENSG00000177191.2
141.076	-0.313602	0.213884	-1.46622	0.142587	0.340851	B3GNT9	ENSG00000237172.3
31.8767	-0.900365	0.386049	-2.33226	0.0196872	0.0788795	B3GNTL1	ENSG00000175711.8
1128.57	0.0634911	0.0844635	0.751699	0.452232	0.718629	B4GALNT1	ENSG00000135454.13
0						B4GALNT2	ENSG00000167080.8
134.263	0.0673029	0.17819	0.377704	0.70565	0.908602	B4GALNT3	ENSG00000139044.11
1645.81	-0.0141267	0.0702478	-0.201097	0.840622	0.985412	B4GALNT4	ENSG00000182272.11
123.924	0.42921	0.175145	2.45059	0.0142622	0.061688	B4GALT1	ENSG00000086062.12
1078.34	-0.571297	0.0759882	-7.51824	5.55195e-14	4.05941e-12	B4GALT2	ENSG00000117411.16
326.056	0.0100362	0.152199	0.0659409	0.947425	1	B4GALT3	ENSG00000158850.14
259.367	0.0546717	0.150834	0.362464	0.717006	0.915189	B4GALT4	ENSG00000121578.12
1969.54	-0.20977	0.0565333	-3.71056	0.000206805	0.00185832	B4GALT5	ENSG00000158470.5
214.493	0.264289	0.157147	1.6818	0.0926081	0.251022	B4GALT6	ENSG00000118276.11
157.34	0.502444	0.163402	3.0749	0.00210574	0.0131428	B4GALT7	ENSG00000027847.13
420.038	-0.0133801	0.105959	-0.126276	0.899514	1	B4GAT1	ENSG00000174684.6
47.2804	0.100698	0.311716	0.323045	0.746661	0.936699	B9D1	ENSG00000108641.15
20.2586	-0.303776	0.560224	-0.54224	0.587653	0.830362	B9D2	ENSG00000123810.7
103.129	-0.5048	0.20096	-2.51195	0.0120068	0.0541582	BAALC	ENSG00000164929.16
0						BAAT	ENSG00000136881.11
340.956	0.163456	0.136812	1.19474	0.232188	0.473814	BABAM1	ENSG00000105393.15
113.432	-0.491348	0.230158	-2.13483	0.0327749	0.116548	BABAM2	ENSG00000158019.20
1197.88	0.255046	0.0811869	3.14146	0.00168105	0.0108533	BACE1	ENSG00000186318.16
114.172	-0.37114	0.178639	-2.0776	0.0377466	0.129677	BACE2	ENSG00000182240.15
293.394	-0.320921	0.132953	-2.4138	0.0157873	0.0667799	BACH1	ENSG00000156273.15
353.178	0.042851	0.118152	0.362676	0.716847	0.915189	BACH2	ENSG00000112182.14
237.708	0.462702	0.139235	3.32318	0.000889979	0.00633785	BAD	ENSG00000002330.13
938.665	0.492964	0.0744838	6.6184	3.6311e-11	1.65479e-09	BAG1	ENSG00000107262.21
200.664	0.064803	0.171509	0.377841	0.705549	0.908598	BAG2	ENSG00000112208.11
394.95	0.0488053	0.118557	0.411662	0.680587	0.897242	BAG3	ENSG00000151929.9
234.897	0.146979	0.144627	1.01626	0.309504	0.570788	BAG4	ENSG00000156735.10
625.088	-0.148347	0.0946888	-1.56668	0.117188	0.296883	BAG5	ENSG00000166170.9
41.0102	1.64773	0.702064	2.34698	0.0189263	0.076545	BAG6	ENSG00000204463.12
1.14436	-2.0261	2.80263	-0.722928	0.469724	0.733456	BAHCC1	ENSG00000266074.8
585.009	-0.0715596	0.0972528	-0.73581	0.461846	0.727051	BAHD1	ENSG00000140320.11
166.353	0.0715054	0.179514	0.398327	0.690389	0.902409	BAIAP2	ENSG00000175866.15
2.67873	-4.32073	2.00678	-2.15307	0.0313132	0.112776	BAIAP2L1	ENSG00000006453.13
4.75869	0.029797	1.0008	0.0297731	0.976248	1	BAIAP2L2	ENSG00000128298.16
19.4298	3.55778	1.16672	3.04937	0.00229318	0.0141449	BAIAP3	ENSG00000007516.13
100.381	0.413995	0.210171	1.9698	0.0488615	0.157638	BAK1	ENSG00000030110.12
992.178	-0.24876	0.0851032	-2.92304	0.00346628	0.0199058	BAMBI	ENSG00000095739.10
836.459	-0.558858	0.0950026	-5.88256	4.03976e-09	1.22736e-07	BANF1	ENSG00000175334.7
0						BANF2	ENSG00000125888.14
0.166925	0	4.40736	0	1	1	BANK1	ENSG00000153064.11
130.415	-0.0180539	0.200816	-0.0899028	0.928364	1	BANP	ENSG00000172530.20
1655.35	0.115864	0.0694472	1.66838	0.0952409	0.256116	BAP1	ENSG00000163930.9
169.581	0.0926182	0.183291	0.505306	0.613344	0.848385	BARD1	ENSG00000138376.10
0.19048	0	4.40736	0	1	1	BARHL1	ENSG00000125492.9
0.263113	0	4.40736	0	1	1	BARHL2	ENSG00000143032.7
0.835712	-2.55122	3.18596	-0.800768	0.423266	0.689317	BARX1	ENSG00000131668.13
0						BARX2	ENSG00000043039.6
1728.69	-0.347193	0.0665042	-5.22061	1.78331e-07	3.76387e-06	BASP1	ENSG00000176788.8
0						BATF	ENSG00000156127.6
0.250388	0	4.40736	0	1	1	BATF2	ENSG00000168062.9
58.4013	-0.56641	0.276634	-2.0475	0.0406088	0.137256	BATF3	ENSG00000123685.8
517.039	-0.0444354	0.0984432	-0.45138	0.651715	0.877795	BAX	ENSG00000087088.19
830.611	-0.208705	0.0775042	-2.69283	0.00708494	0.0353401	BAZ1A	ENSG00000198604.10
2374.81	-0.193919	0.0479502	-4.04417	5.25086e-05	0.000578836	BAZ1B	ENSG00000009954.10
1372.08	-0.0462075	0.0679686	-0.679836	0.496609	0.758914	BAZ2A	ENSG00000076108.11
272.387	0.163911	0.127574	1.28484	0.198849	0.427264	BAZ2B	ENSG00000123636.17
128.492	-0.843702	0.212675	-3.96709	7.27563e-05	0.000765819	BBC3	ENSG00000105327.17
357.95	-0.167522	0.104537	-1.60252	0.10904	0.28202	BBIP1	ENSG00000214413.7
9.9338	0.196815	0.701144	0.280706	0.778936	0.957938	BBOF1	ENSG00000119636.15
0.0810746	-1.08891	4.40736	-0.247065	0.804858	0.965971	BBOX1	ENSG00000129151.8
59.4489	0.474348	0.31235	1.51864	0.128853	0.316806	BBS1	ENSG00000174483.19
218.016	-0.167329	0.148832	-1.12428	0.260894	0.510369	BBS10	ENSG00000179941.7
40.222	0.780965	0.343853	2.27122	0.0231338	0.0892476	BBS12	ENSG00000181004.9
305.17	0.486064	0.12113	4.01275	6.00158e-05	0.000647591	BBS2	ENSG00000125124.11
200.366	0.098005	0.173869	0.563671	0.572978	0.820588	BBS4	ENSG00000140463.13
108.884	-0.357906	0.228867	-1.56382	0.11786	0.297845	BBS5	ENSG00000163093.11
302.565	0.259572	0.149633	1.73472	0.0827905	0.232243	BBS7	ENSG00000138686.9
149.415	-0.0529346	0.171885	-0.307965	0.758109	0.943876	BBS9	ENSG00000122507.20
720.706	-0.0361414	0.0836904	-0.431847	0.665853	0.887118	BBX	ENSG00000114439.18
0.159003	0.834613	4.40736	0.189368	0.849804	0.985412	BCAM	ENSG00000187244.11
22.1476	2.15674	0.743203	2.90196	0.00370836	0.0210441	BCAN	ENSG00000132692.18
258.553	0.00386474	0.145331	0.0265928	0.978785	1	BCAP29	ENSG00000075790.10
830.15	0.0225127	0.0819791	0.274615	0.783612	0.960677	BCAP31	ENSG00000185825.16
519.303	0.190346	0.103606	1.83721	0.0661784	0.197062	BCAR1	ENSG00000050820.16
185.511	-0.088513	0.167337	-0.528952	0.596839	0.835907	BCAR3	ENSG00000137936.17
1.74763	1.73091	2.2832	0.758107	0.448387	0.714275	BCAS1	ENSG00000064787.13
[truncated: 17,908 more rows]

## Sheet: CLB-BA_48hrs_vs_0hrs
baseMean	log2FoldChange	lfcSE	stat	pvalue	padj	HGNC	ENSG
25.1219	0.0208869	0.553517	0.0377349	0.969899	1	A1BG	ENSG00000121410.11
0.541326	0	4.40736	0	1	1	A1CF	ENSG00000148584.14
0.242433	0	4.40736	0	1	1	A2M	ENSG00000175899.14
0						A2ML1	ENSG00000166535.19
0						A3GALT2	ENSG00000184389.9
0.725529	1.74412	3.38206	0.515696	0.606066	0.766564	A4GALT	ENSG00000128274.16
0.281046	2.54873	4.31358	0.590862	0.554613	0.722828	A4GNT	ENSG00000118017.3
530.987	-1.04548	0.104533	-10.0015	1.50155e-23	5.26835e-22	AAAS	ENSG00000094914.12
408.2	-0.811721	0.0957447	-8.47797	2.29163e-17	4.94549e-16	AACS	ENSG00000081760.16
0						AADAC	ENSG00000114771.13
0						AADACL2	ENSG00000197953.5
0						AADACL3	ENSG00000188984.11
0						AADACL4	ENSG00000204518.2
223.419	-0.592991	0.143064	-4.14495	3.39891e-05	0.000163966	AADAT	ENSG00000109576.13
480.05	0.298372	0.107759	2.76887	0.0056251	0.0163589	AAGAB	ENSG00000103591.12
900.841	0.290505	0.0832756	3.48848	0.00048577	0.00184826	AAK1	ENSG00000115977.18
41.9149	0.908803	0.33903	2.6806	0.00734909	0.0207249	AAMDC	ENSG00000087884.14
617.302	0.0622122	0.0877189	0.709222	0.478187	0.652975	AAMP	ENSG00000127837.9
1.69022	1.13773	2.33007	0.488284	0.625348	0.78188	AANAT	ENSG00000129673.9
510.068	0.089327	0.101824	0.877267	0.380342	0.554736	AAR2	ENSG00000131043.11
0.183709	1.90116	4.35076	0.436971	0.662132	0.809742	AARD	ENSG00000205002.3
1551.55	-0.827662	0.0605681	-13.665	1.64361e-42	1.97172e-40	AARS	ENSG00000090861.15
592.387	0.413099	0.0932608	4.4295	9.44517e-06	5.04412e-05	AARS2	ENSG00000124608.4
140.698	0.1022	0.189852	0.538316	0.590359	0.753596	AARSD1	ENSG00000266967.6
111.076	-0.47919	0.221948	-2.15902	0.0308488	0.0715522	AASDH	ENSG00000157426.13
1174.09	-0.547666	0.0796983	-6.87174	6.34231e-12	7.96573e-11	AASDHPPT	ENSG00000149313.10
2.11186	3.94864	2.01305	1.96152	0.0498181	0.107767	AASS	ENSG00000008311.14
0.0801831	0	4.40736	0	1	1	AATF	ENSG00000275700.4
422.377	-0.0831715	0.116065	-0.716597	0.473623	0.649014	AATK	ENSG00000181409.12
454.482	0.531545	0.111424	4.77045	1.83817e-06	1.10459e-05	ABAT	ENSG00000183044.11
124.261	-0.599587	0.201932	-2.96926	0.00298519	0.00936064	ABCA1	ENSG00000165029.15
4.10428	4.60114	1.64313	2.80023	0.00510663	0.0150579	ABCA10	ENSG00000154263.17
25.4721	-0.145543	0.442148	-0.329174	0.742024	0.871948	ABCA12	ENSG00000144452.14
0.412009	0	4.40736	0	1	1	ABCA13	ENSG00000179869.14
1386.33	0.223577	0.0579416	3.85867	0.000114008	0.000496673	ABCA2	ENSG00000107331.16
2507.03	-0.362644	0.0540836	-6.70525	2.01057e-11	2.3839e-10	ABCA3	ENSG00000167972.13
0.166925	0	4.40736	0	1	1	ABCA4	ENSG00000198691.12
212.506	0.552242	0.156622	3.52597	0.000421942	0.00163205	ABCA5	ENSG00000154265.15
0.740556	0	3.90976	0	1	1	ABCA6	ENSG00000154262.12
350.057	2.17472	0.140664	15.4603	6.42662e-54	1.34423e-51	ABCA7	ENSG00000064687.12
1.6248	4.54539	2.37601	1.91303	0.055744	0.118189	ABCA8	ENSG00000141338.13
1.29882	0.771552	2.68611	0.287238	0.77393	0.896972	ABCA9	ENSG00000154258.16
50.8184	3.46051	0.440435	7.85702	3.93376e-15	6.9383e-14	ABCB1	ENSG00000085563.14
280.873	-0.759625	0.126301	-6.01441	1.80544e-09	1.67648e-08	ABCB10	ENSG00000135776.4
0						ABCB11	ENSG00000073734.9
17.2858	1.2538	0.529821	2.36645	0.0179595	0.0447273	ABCB4	ENSG00000005471.17
0						ABCB5	ENSG00000004846.16
346.826	0.371876	0.121083	3.07125	0.00213161	0.00694712	ABCB6	ENSG00000115657.13
269.161	0.112604	0.146949	0.766282	0.443508	0.619825	ABCB7	ENSG00000131269.16
467.31	-0.39609	0.101764	-3.89223	9.93261e-05	0.000439042	ABCB8	ENSG00000197150.12
263.569	0.124314	0.147592	0.842286	0.399628	0.575448	ABCB9	ENSG00000150967.17
135.502	-0.363023	0.373097	-0.972999	0.330554	0.499767	ABCC1	ENSG00000103222.18
246.263	0.688177	0.147417	4.66824	3.03787e-06	1.76695e-05	ABCC10	ENSG00000124574.14
6.59134	-0.583194	1.04363	-0.558812	0.57629	0.740853	ABCC11	ENSG00000121270.15
0.0747448	0.771554	4.40736	0.175061	0.861032	0.944395	ABCC12	ENSG00000140798.16
19.5872	2.25071	0.574543	3.91739	8.9512e-05	0.000399013	ABCC2	ENSG00000023839.11
0.753352	1.88264	3.37657	0.557561	0.577144	0.741281	ABCC3	ENSG00000108846.15
1194.62	-0.454163	0.0774318	-5.86533	4.4824e-09	3.95448e-08	ABCC4	ENSG00000125257.14
1229.2	-0.311999	0.0832251	-3.74886	0.000177641	0.00074313	ABCC5	ENSG00000114770.16
7.13195	2.57489	1.09714	2.34692	0.0189295	0.0468499	ABCC6	ENSG00000091262.15
174.069	-0.312193	0.187422	-1.66572	0.0957686	0.185399	ABCC8	ENSG00000006071.13
0.155556	0.771545	4.40736	0.175058	0.861034	0.944395	ABCC9	ENSG00000069431.11
88.5703	1.27148	0.24649	5.15835	2.49132e-07	1.71502e-06	ABCD1	ENSG00000101986.11
18.9026	1.28165	0.560897	2.285	0.0223128	0.0539709	ABCD2	ENSG00000173208.3
499.001	-0.136779	0.115686	-1.18233	0.237073	0.385975	ABCD3	ENSG00000117528.12
666.291	0.578124	0.0871984	6.62998	3.35726e-11	3.86274e-10	ABCD4	ENSG00000119688.20
1434.44	-0.546352	0.0552712	-9.88493	4.8392e-23	1.62452e-21	ABCE1	ENSG00000164163.10
2.1616	-3.68159	2.16728	-1.69871	0.0893734	0.175215	ABCF1	ENSG00000204574.12
302.977	-0.542294	0.128073	-4.23427	2.29294e-05	0.000114122	ABCF2	ENSG00000033050.8
396.36	0.317296	0.109812	2.88945	0.00385922	0.0117556	ABCF3	ENSG00000161204.11
157.23	-0.505623	0.176051	-2.87202	0.00407854	0.0123385	ABCG1	ENSG00000160179.18
34.2587	-0.0191083	0.428543	-0.0445889	0.964435	1	ABCG2	ENSG00000118777.11
72.5203	0.28707	0.319957	0.897214	0.369605	0.543546	ABCG4	ENSG00000172350.9
0.0861957	-1.15197	4.40736	-0.261375	0.793803	0.906799	ABCG5	ENSG00000138075.12
4.77324	2.87448	1.47598	1.9475	0.0514742	0.110588	ABCG8	ENSG00000143921.7
18.1968	2.28478	0.670793	3.40608	0.000659024	0.00243864	ABHD1	ENSG00000143994.13
288.49	0.351753	0.114743	3.06558	0.00217248	0.00705916	ABHD10	ENSG00000144827.8
102.811	0.547753	0.23959	2.28621	0.0222422	0.0538549	ABHD11	ENSG00000106077.18
433.513	0.00230556	0.126132	0.018279	0.985416	1	ABHD12	ENSG00000100997.18
0.783925	-1.15201	3.24882	-0.354592	0.722895	0.858185	ABHD12B	ENSG00000131969.14
253.56	0.180514	0.14494	1.24544	0.21297	0.353397	ABHD13	ENSG00000139826.5
87.2532	-0.0679126	0.202085	-0.336059	0.736826	0.868034	ABHD14A	ENSG00000248487.8
2.65594	-0.425335	1.47375	-0.288606	0.772883	0.896012	ABHD14A-ACY1	ENSG00000114786.16
103.792	-1.12366	0.20465	-5.49066	4.00432e-08	3.09623e-07	ABHD14B	ENSG00000114779.19
109.164	1.33147	0.257944	5.16185	2.44525e-07	1.68543e-06	ABHD15	ENSG00000168792.4
0						ABHD16A	ENSG00000204427.11
90.9623	0.565109	0.288475	1.95895	0.0501185	0.108216	ABHD16B	ENSG00000183260.7
1255.68	0.378413	0.0666305	5.67928	1.35267e-08	1.12653e-07	ABHD17A	ENSG00000129968.15
392.222	0.331514	0.110856	2.99048	0.00278536	0.00881878	ABHD17B	ENSG00000107362.13
192.463	-1.18214	0.162541	-7.27284	3.51996e-13	5.12294e-12	ABHD17C	ENSG00000136379.11
115.557	0.576633	0.214064	2.69374	0.0070655	0.0200286	ABHD18	ENSG00000164074.15
1246.25	0.0268623	0.0683203	0.393182	0.694185	0.836751	ABHD2	ENSG00000140526.17
207.14	1.07888	0.172631	6.24961	4.11467e-10	4.13367e-09	ABHD3	ENSG00000158201.9
57.9793	0.998525	0.298282	3.34759	0.000815173	0.0029489	ABHD4	ENSG00000100439.10
397.504	0.529054	0.122563	4.31658	1.58468e-05	8.11998e-05	ABHD5	ENSG00000011198.9
219.205	0.0765143	0.139162	0.549821	0.582442	0.746176	ABHD6	ENSG00000163686.14
310.239	0.220837	0.13778	1.60282	0.108974	0.206106	ABHD8	ENSG00000127220.5
293.378	0.320252	0.123423	2.59475	0.00946605	0.0257741	ABI1	ENSG00000136754.17
2179.54	-0.195293	0.0497231	-3.9276	8.57977e-05	0.000384346	ABI2	ENSG00000138443.15
0.323244	0	4.40736	0	1	1	ABI3	ENSG00000108798.8
2.86871	3.17364	1.64283	1.93181	0.0533833	0.114103	ABI3BP	ENSG00000154175.16
1406.95	-0.503237	0.0592343	-8.49571	1.96728e-17	4.25679e-16	ABL1	ENSG00000097007.17
720.558	-0.212402	0.0920032	-2.30863	0.0209639	0.0511097	ABL2	ENSG00000143322.19
1667.75	-0.507376	0.0561299	-9.0393	1.57674e-19	4.06391e-18	ABLIM1	ENSG00000099204.19
29.955	1.3362	0.427385	3.12646	0.00176925	0.00587247	ABLIM2	ENSG00000163995.19
18.5917	1.44551	0.709126	2.03844	0.0415063	0.0923085	ABLIM3	ENSG00000173210.19
0.161622	0	4.40736	0	1	1	ABO	ENSG00000175164.14
55.9595	0.488268	0.376106	1.29822	0.194212	0.328179	ABR	ENSG00000159842.15
0.298979	2.63275	4.30985	0.610869	0.541286	0.710366	ABRA	ENSG00000174429.3
11.473	-0.90551	0.665398	-1.36085	0.17356	0.300278	ABRACL	ENSG00000146386.7
128.452	-0.405764	0.183085	-2.21626	0.0266735	0.0630054	ABRAXAS1	ENSG00000163322.13
362.441	-0.0505614	0.11224	-0.450476	0.652367	0.803577	ABRAXAS2	ENSG00000165660.7
202.039	-0.212116	0.155835	-1.36116	0.173463	0.300143	ABT1	ENSG00000146109.4
98.6674	0.81343	0.262219	3.1021	0.00192153	0.00632689	ABTB1	ENSG00000114626.17
53.0073	2.37762	0.407089	5.84053	5.20349e-09	4.54838e-08	ABTB2	ENSG00000166016.5
0.263113	2.46014	4.31775	0.569773	0.568831	0.734395	AC000120.2	ENSG00000285772.1
0						AC000120.3	ENSG00000285953.1
73.2706	0.184429	0.237069	0.777956	0.436595	0.613421	AC001226.2	ENSG00000283208.1
0						AC002094.3	ENSG00000273171.1
0						AC002310.4	ENSG00000260869.1
0.526269	0	4.40736	0	1	1	AC002310.5	ENSG00000261459.1
0						AC002985.1	ENSG00000268193.5
0						AC002996.1	ENSG00000257767.2
0						AC003002.1	ENSG00000268133.1
0						AC003002.2	ENSG00000268533.1
2.29499	3.14354	2.25418	1.39454	0.163155	0.286254	AC003002.3	ENSG00000269533.5
0.14397	0.771545	4.40736	0.175058	0.861034	0.944395	AC003005.1	ENSG00000268107.5
1.17505	2.79691	2.81576	0.993305	0.320561	0.488142	AC003006.1	ENSG00000269026.2
0						AC003688.1	ENSG00000262302.1
0.90483	0	3.575	0	1	1	AC004076.1	ENSG00000268163.1
0						AC004080.3	ENSG00000257184.3
0						AC004233.2	ENSG00000270168.2
0.605194	2.21856	4.3305	0.512311	0.608433	0.767772	AC004593.3	ENSG00000285162.1
0.449067	-2.61254	4.32925	-0.603463	0.546201	0.714678	AC004687.2	ENSG00000285897.1
0.166925	0	4.40736	0	1	1	AC004691.2	ENSG00000250424.4
2.00926	-2.11417	1.92156	-1.10024	0.271229	0.429246	AC004754.1	ENSG00000269881.1
0						AC004805.1	ENSG00000266076.1
0						AC004832.3	ENSG00000249590.7
3.67044	-3.23175	1.53661	-2.10316	0.0354514	0.0806567	AC004922.1	ENSG00000284292.1
0.654583	0	4.2669	0	1	1	AC004997.1	ENSG00000248751.6
0.878444	0	3.78626	0	1	1	AC005020.2	ENSG00000272647.3
2.58401	1.08257	1.70833	0.6337	0.526277	0.696424	AC005041.1	ENSG00000159239.13
0						AC005154.5	ENSG00000281039.1
0						AC005258.1	ENSG00000273734.1
0.573543	2.37933	3.93041	0.605365	0.544936	0.713878	AC005324.3	ENSG00000251537.4
0						AC005324.4	ENSG00000255104.8
1.64935	2.49426	4.31611	0.577894	0.563336	0.730097	AC005520.1	ENSG00000258653.3
0						AC005551.1	ENSG00000284638.1
31.7655	1.22161	0.385464	3.16919	0.00152862	0.00517094	AC005670.2	ENSG00000262633.2
0						AC005697.1	ENSG00000266202.1
0						AC005702.1	ENSG00000267318.1
54.2373	-1.87226	0.29545	-6.33697	2.34321e-10	2.43499e-09	AC005726.1	ENSG00000258472.8
0						AC005779.2	ENSG00000267545.1
0.161622	0	4.40736	0	1	1	AC005832.4	ENSG00000272921.1
0.260227	-1.15199	4.40736	-0.261379	0.7938	0.906799	AC005833.1	ENSG00000255639.3
0						AC005837.2	ENSG00000267168.1
1.28144	3.73015	2.72127	1.37074	0.170457	0.296161	AC005943.1	ENSG00000267059.2
5.46438	0.137386	2.19545	0.0625779	0.950103	1	AC006030.1	ENSG00000264324.1
0.756903	0.771541	3.64182	0.211856	0.832219	0.935858	AC006059.2	ENSG00000280571.2
0.647613	1.63663	3.86419	0.423537	0.671903	0.818312	AC006064.6	ENSG00000285238.2
6.34954	-0.831691	1.08104	-0.769344	0.441689	0.618395	AC006254.1	ENSG00000243696.4
0.367419	2.91361	4.29881	0.67777	0.497917	0.671036	AC006486.1	ENSG00000268643.1
0						AC006518.7	ENSG00000284826.1
0						AC006538.2	ENSG00000267001.1
0						AC006978.2	ENSG00000281593.1
1.69404	1.90886	2.21752	0.860812	0.389342	0.564618	AC007040.2	ENSG00000258881.6
0.993174	-3.7578	3.47001	-1.08294	0.278837	0.438987	AC007192.1	ENSG00000268173.3
25.8785	1.17449	0.419111	2.80234	0.00507328	0.0149757	AC007240.1	ENSG00000284681.2
0						AC007326.4	ENSG00000283809.1
0.0918546	0.771554	4.40736	0.175061	0.861032	0.944395	AC007375.1	ENSG00000259164.1
0						AC007731.5	ENSG00000277971.1
0						AC007846.2	ENSG00000285471.1
1.66627	0	2.50766	0	1	1	AC007906.2	ENSG00000277639.2
0						AC007998.2	ENSG00000267140.1
0						AC008012.1	ENSG00000285901.1
0						AC008073.3	ENSG00000276087.2
0						AC008162.2	ENSG00000278646.1
0.247736	0	4.40736	0	1	1	AC008397.1	ENSG00000284797.1
4.73177	3.86024	1.55698	2.47931	0.0131636	0.0341005	AC008397.2	ENSG00000285188.1
0						AC008403.1	ENSG00000268465.1
0						AC008481.3	ENSG00000267477.1
0						AC008537.1	ENSG00000268797.1
0						AC008575.1	ENSG00000258864.1
0.0801831	0	4.40736	0	1	1	AC008581.2	ENSG00000285000.1
0.32754	1.35376	4.32513	0.312998	0.754282	0.882032	AC008676.3	ENSG00000285868.1
0						AC008687.1	ENSG00000267335.2
0						AC008687.4	ENSG00000268655.2
0						AC008687.8	ENSG00000283663.1
0						AC008695.1	ENSG00000273217.1
0.878646	3.83171	2.95547	1.29648	0.194809	0.328942	AC008750.8	ENSG00000269403.1
0						AC008758.1	ENSG00000196826.7
1.4865	-0.130766	2.11232	-0.0619063	0.950637	1	AC008758.4	ENSG00000268744.1
0						AC008758.5	ENSG00000268870.1
0						AC008758.6	ENSG00000269755.1
0.0952398	0	4.40736	0	1	1	AC008763.2	ENSG00000268400.5
0						AC008763.3	ENSG00000269711.1
0						AC008764.1	ENSG00000141979.4
0.080811	0	4.40736	0	1	1	AC008764.4	ENSG00000268790.5
0						AC008770.1	ENSG00000257355.1
0.826189	2.46928	3.42221	0.721547	0.470573	0.645811	AC008770.2	ENSG00000267179.1
1.70433	-0.228142	2.09337	-0.108983	0.913216	0.983249	AC008878.1	ENSG00000267952.1
0						AC008878.2	ENSG00000268614.1
0						AC008878.3	ENSG00000268861.6
0						AC008982.1	ENSG00000268083.5
0						AC009086.2	ENSG00000277669.1
0.766178	1.14089	3.19175	0.357449	0.720755	0.857017	AC009119.2	ENSG00000260300.5
0						AC009133.6	ENSG00000280893.1
0						AC009163.2	ENSG00000260092.1
0						AC009163.4	ENSG00000261717.5
2.12791	4.16458	2.09897	1.9841	0.0472442	0.103047	AC009336.2	ENSG00000278500.1
0						AC009477.2	ENSG00000284479.1
3.57435	-3.09711	1.82162	-1.7002	0.0890939	0.174792	AC009690.1	ENSG00000260729.1
0.646488	0	4.40736	0	1	1	AC009690.3	ENSG00000273025.1
0.948422	2.79856	2.88677	0.96944	0.332325	0.501795	AC009879.2	ENSG00000285655.1
3.15792	0.771566	2.06842	0.373022	0.709132	0.846651	AC009879.3	ENSG00000285791.1
1.10434	3.88729	2.60173	1.49412	0.135145	0.245862	AC010132.3	ENSG00000256646.7
0.668003	-1.14383	3.20339	-0.357067	0.721041	0.857231	AC010197.2	ENSG00000285854.1
0						AC010255.3	ENSG00000250803.6
0						AC010319.2	ENSG00000269035.1
0						AC010323.1	ENSG00000167774.2
0						AC010325.1	ENSG00000261341.6
2.95228	5.15176	3.1706	1.62485	0.104194	0.199008	AC010326.2	ENSG00000269476.1
0						AC010327.1	ENSG00000267110.1
0						AC010422.3	ENSG00000269242.1
0						AC010422.5	ENSG00000269590.1
9.36102	-0.466635	0.820503	-0.568719	0.569547	0.734768	AC010422.6	ENSG00000269693.1
118.064	-0.0102692	0.228396	-0.044962	0.964138	1	AC010422.8	ENSG00000285589.1
0						AC010463.1	ENSG00000269307.1
0						AC010487.3	ENSG00000283088.1
1.88133	1.76985	1.89635	0.933292	0.350669	0.522625	AC010522.1	ENSG00000268750.6
0.161622	0	4.40736	0	1	1	AC010531.1	ENSG00000131152.4
0.417313	0	4.40736	0	1	1	AC010542.3	ENSG00000260851.6
0.55701	0	4.40736	0	1	1	AC010547.4	ENSG00000261611.6
0						AC010615.4	ENSG00000269237.1
1.43295	-3.27488	2.67847	-1.22267	0.221456	0.364807	AC010616.1	ENSG00000268041.2
0						AC010616.2	ENSG00000285505.1
0						AC010619.1	ENSG00000269469.1
0						AC010646.1	ENSG00000269095.1
0.312426	1.63521	4.37142	0.374068	0.708354	0.846281	AC011005.1	ENSG00000230626.4
0.417313	0	4.40736	0	1	1	AC011195.2	ENSG00000266826.2
0						AC011330.3	ENSG00000284772.1
31.077	-0.876431	0.402536	-2.17728	0.0294599	0.0687904	AC011448.1	ENSG00000258674.5
0						AC011452.1	ENSG00000269179.1
0						AC011455.2	ENSG00000269547.1
0						AC011462.1	ENSG00000255730.5
0						AC011473.4	ENSG00000269741.5
0						AC011479.1	ENSG00000267748.4
0						AC011498.4	ENSG00000267385.1
0						AC011499.1	ENSG00000267157.1
12.8185	-0.494799	0.678247	-0.729525	0.46568	0.640929	AC011511.1	ENSG00000167807.15
0.0657782	0.771554	4.40736	0.175061	0.861032	0.944395	AC011511.4	ENSG00000267303.1
0						AC011530.1	ENSG00000268434.5
0						AC011604.2	ENSG00000257046.5
0.156384	0	4.40736	0	1	1	AC012184.2	ENSG00000260537.2
0.530363	-2.75602	4.32154	-0.637739	0.523644	0.69381	AC012213.5	ENSG00000285982.1
0.272079	2.50503	4.31561	0.580459	0.561605	0.729215	AC012254.2	ENSG00000267228.7
0.0781918	0	4.40736	0	1	1	AC012309.1	ENSG00000267360.6
0						AC012476.1	ENSG00000285396.1
0						AC012531.2	ENSG00000273049.1
7.031	4.66534	1.40899	3.31112	0.000929234	0.00331448	AC012651.1	ENSG00000258461.5
4.13634	2.61781	1.24285	2.1063	0.0351786	0.0800809	AC013394.1	ENSG00000279765.3
0.166925	0	4.40736	0	1	1	AC013470.2	ENSG00000226690.8
1.66025	2.41886	2.18696	1.10604	0.26871	0.426211	AC013489.1	ENSG00000173867.10
0.939143	0.557166	3.26254	0.170777	0.864399	0.947353	AC013717.1	ENSG00000285542.1
0						AC015688.4	ENSG00000266728.5
509.84	-0.586025	0.098312	-5.96087	2.50898e-09	2.2881e-08	AC015802.6	ENSG00000284526.1
3.35968	3.3717	1.50412	2.24165	0.0249839	0.0596185	AC015813.2	ENSG00000266086.2
2.8765	0.494525	1.53742	0.321658	0.747712	0.876928	AC017083.3	ENSG00000273398.6
0.316089	2.70759	4.3067	0.628694	0.529549	0.699619	AC018362.3	ENSG00000285942.1
0						AC018512.1	ENSG00000262560.1
2.15301	3.19628	2.04882	1.56006	0.118746	0.221056	AC018523.2	ENSG00000256206.2
0						AC018554.3	ENSG00000278499.2
0						AC018709.1	ENSG00000272297.2
0						AC018755.2	ENSG00000268500.5
0						AC019117.2	ENSG00000283321.1
0						AC020636.2	ENSG00000260234.5
0						AC020907.6	ENSG00000285526.1
0						AC020909.1	ENSG00000142539.9
7.96089	3.26053	1.07331	3.03783	0.00238291	0.00767262	AC020915.1	ENSG00000267216.1
0.903599	1.49981	3.16986	0.473147	0.636108	0.790345	AC020915.5	ENSG00000283515.1
0.161654	0	4.40736	0	1	1	AC020922.1	ENSG00000267706.3
0						AC021072.1	ENSG00000283536.2
0.268671	0	4.40736	0	1	1	AC021097.2	ENSG00000285292.1
0						AC021097.3	ENSG00000285480.1
0						AC021660.3	ENSG00000285635.1
0						AC022167.5	ENSG00000283516.1
0						AC022335.1	ENSG00000257062.6
0						AC022384.1	ENSG00000272410.5
34.912	0.653953	0.372106	1.75744	0.0788433	0.157948	AC022400.6	ENSG00000272916.5
0						AC022414.1	ENSG00000284762.1
0						AC022506.1	ENSG00000285133.1
0						AC022826.2	ENSG00000258677.2
5.76657	-0.03554	0.926437	-0.0383621	0.969399	1	AC023055.1	ENSG00000257390.5
9.26186	-0.264323	0.755952	-0.349656	0.726597	0.861639	AC023509.3	ENSG00000267281.2
0						AC024592.3	ENSG00000267740.5
1.04286	-3.27038	3.11606	-1.04952	0.293937	0.457201	AC025165.3	ENSG00000257921.5
0						AC025263.2	ENSG00000258052.1
130.673	0.150915	0.195901	0.770362	0.441085	0.617868	AC025283.2	ENSG00000262621.5
13.9155	0.0957867	0.627903	0.15255	0.878753	0.957962	AC025283.3	ENSG00000285329.1
0						AC025287.4	ENSG00000284484.1
0						AC026316.5	ENSG00000285218.1
0						AC026398.1	ENSG00000281938.1
0						AC026464.1	ENSG00000259900.5
0						AC026464.3	ENSG00000260371.1
0.879777	0	3.62619	0	1	1	AC026464.4	ENSG00000260914.3
0						AC026464.6	ENSG00000272617.3
0						AC026786.1	ENSG00000256825.4
2.43375	0.016147	1.70692	0.00945977	0.992452	1	AC026954.2	ENSG00000261915.6
0.901307	0.771546	3.36176	0.229507	0.818475	0.925232	AC027644.4	ENSG00000284461.2
1.20154	3.44031	2.5108	1.37021	0.170622	0.296359	AC027796.3	ENSG00000262304.2
0						AC034102.2	ENSG00000257411.1
0.323244	0	4.40736	0	1	1	AC036214.3	ENSG00000276418.5
1.15989	4.10149	2.45381	1.67147	0.0946282	0.1834	AC037459.1	ENSG00000248235.6
34.3883	-0.362891	0.383731	-0.945691	0.344306	0.515448	AC040162.1	ENSG00000261884.2
0						AC046185.1	ENSG00000125695.12
0						AC048338.1	ENSG00000256861.1
0						AC055811.2	ENSG00000264187.1
0						AC058822.1	ENSG00000282278.1
0.325872	0	4.40736	0	1	1	AC067752.1	ENSG00000285551.1
0						AC067968.1	ENSG00000267022.1
0						AC068234.1	ENSG00000259753.1
1.40531	3.15647	2.29256	1.37683	0.168564	0.293471	AC068533.4	ENSG00000249319.2
0.191217	-1.15198	4.40736	-0.261377	0.793802	0.906799	AC068547.1	ENSG00000283228.1
2.19791	0.823968	1.96765	0.418757	0.675394	0.82152	AC068580.4	ENSG00000250644.3
0						AC068631.2	ENSG00000283149.1
0						AC068775.1	ENSG00000255641.1
0.343296	2.46013	4.31775	0.569771	0.568833	0.734395	AC068790.8	ENSG00000274874.1
256.132	-0.577894	0.142703	-4.04963	5.12977e-05	0.000238848	AC068831.7	ENSG00000284946.1
5.6279	-0.150074	0.978888	-0.153311	0.878153	0.9575	AC068896.1	ENSG00000258539.1
3.11438	0.502386	1.21886	0.412178	0.680209	0.825471	AC068946.1	ENSG00000280537.2
26.6198	-0.00995313	0.416743	-0.0238832	0.980946	1	AC068946.2	ENSG00000284820.1
1.34945	4.45515	2.74649	1.62213	0.104776	0.199932	AC068987.5	ENSG00000284730.1
0.215019	1.48124	4.38408	0.337867	0.735463	0.867053	AC069257.3	ENSG00000272741.1
0.0747448	0.771554	4.40736	0.175061	0.861032	0.944395	AC069368.1	ENSG00000249240.2
0						AC069444.2	ENSG00000285585.1
0.547216	1.56026	3.83786	0.406544	0.684343	0.828637	AC069503.2	ENSG00000256950.2
0						AC073082.1	ENSG00000279956.1
0						AC073111.3	ENSG00000284041.1
76.4299	-0.668564	0.276978	-2.41378	0.0157882	0.0399913	AC073111.5	ENSG00000284691.1
0.328501	0	4.40736	0	1	1	AC073283.3	ENSG00000273269.3
21.2284	0.351481	0.549864	0.639214	0.522683	0.693243	AC073508.2	ENSG00000264058.2
0						AC073610.2	ENSG00000255863.2
1.63778	3.30567	2.48007	1.3329	0.182566	0.312186	AC073610.3	ENSG00000272822.1
0						AC073612.1	ENSG00000258064.1
2.17127	2.68608	2.15853	1.2444	0.213351	0.353851	AC073896.1	ENSG00000144785.8
41.6634	-1.01933	0.399046	-2.55441	0.0106369	0.0285287	AC074143.1	ENSG00000265690.7
0						AC078927.1	ENSG00000228144.2
2.24694	-0.613121	1.82509	-0.33594	0.736916	0.868034	AC079447.1	ENSG00000241962.9
0.46737	-3.17331	4.30296	-0.737473	0.460835	0.63614	AC079594.2	ENSG00000248710.1
0						AC083800.1	ENSG00000251012.2
0						AC084121.11	ENSG00000285913.1
0						AC084121.12	ENSG00000285937.1
0						AC084121.13	ENSG00000285950.1
0						AC084121.5	ENSG00000285607.1
0						AC084121.6	ENSG00000285620.1
0						AC084121.7	ENSG00000285657.1
0						AC084121.8	ENSG00000285720.1
0						AC084121.9	ENSG00000285814.1
0						AC084337.2	ENSG00000283977.1
9.41946	1.46539	0.954304	1.53556	0.124646	0.230219	AC087289.3	ENSG00000267426.5
0						AC087498.1	ENSG00000180042.5
4.55868	0.793468	1.31654	0.602692	0.546713	0.715	AC087632.1	ENSG00000259316.11
0.0834625	0	4.40736	0	1	1	AC087721.2	ENSG00000285920.1
0						AC090004.1	ENSG00000268279.4
0						AC090227.1	ENSG00000266997.2
4.38008	0.174132	1.31371	0.13255	0.89455	0.969457	AC090360.1	ENSG00000267127.7
2.19421	0.497491	1.8924	0.262888	0.792637	0.906799	AC090517.4	ENSG00000285253.1
0						AC090527.2	ENSG00000260170.1
1.82983	0.973228	2.16703	0.449106	0.653355	0.80455	AC091057.6	ENSG00000284906.1
2.44267	3.52638	1.80207	1.95684	0.0503659	0.108664	AC091167.2	ENSG00000261147.1
0						AC091167.6	ENSG00000275674.1
3.06512	4.56471	1.97736	2.30849	0.0209721	0.051122	AC091167.7	ENSG00000284626.1
2.3782	1.33396	1.87134	0.712836	0.475947	0.651159	AC091551.1	ENSG00000267699.2
2.41973	-0.840814	1.85763	-0.452627	0.650818	0.802455	AC091959.3	ENSG00000275740.1
0						AC092017.3	ENSG00000283952.1
0						AC092042.3	ENSG00000273291.5
0.298979	2.63275	4.30985	0.610869	0.541286	0.710366	AC092073.1	ENSG00000266953.6
0						AC092111.3	ENSG00000284393.1
0						AC092143.1	ENSG00000198211.8
0.0810746	-1.15197	4.40736	-0.261375	0.793803	0.906799	AC092329.3	ENSG00000283201.1
0						AC092442.1	ENSG00000284684.1
0.0781918	0	4.40736	0	1	1	AC092587.1	ENSG00000273155.1
3.91902	1.7027	1.22734	1.38731	0.165347	0.289322	AC092647.5	ENSG00000249773.3
8.45456	0.168486	0.809052	0.208251	0.835033	0.937487	AC092718.3	ENSG00000260643.2
3.53306	1.08834	1.22018	0.891949	0.37242	0.546259	AC092718.8	ENSG00000284512.1
23.8728	-1.29507	0.45606	-2.83969	0.00451581	0.0134912	AC092835.1	ENSG00000233757.6
0.351474	0	4.40736	0	1	1	AC093155.3	ENSG00000267561.2
0						AC093227.2	ENSG00000267552.6
421.166	0.163311	0.106695	1.53063	0.125862	0.232028	AC093323.1	ENSG00000170846.17
0						AC093423.3	ENSG00000271949.1
39.4361	0.914266	0.344336	2.65515	0.00792724	0.0221423	AC093512.2	ENSG00000285043.1
0						AC093525.1	ENSG00000259784.1
0.62741	1.59097	3.56089	0.446792	0.655026	0.805878	AC093525.2	ENSG00000260272.1
0.16425	0	4.40736	0	1	1	AC093668.1	ENSG00000270249.1
1.02574	3.59871	2.73399	1.31629	0.188078	0.319701	AC093668.2	ENSG00000272949.1
0.0747448	0.771554	4.40736	0.175061	0.861032	0.944395	AC093668.3	ENSG00000284981.1
0.391159	2.21858	4.3305	0.512314	0.608431	0.767772	AC093827.5	ENSG00000285458.1
0						AC093899.2	ENSG00000251569.1
0.92551	2.4717	3.26916	0.756066	0.44961	0.625672	AC096582.3	ENSG00000283247.2
0.0861957	-1.15197	4.40736	-0.261375	0.793803	0.906799	AC096887.1	ENSG00000272305.5
0						AC097104.1	ENSG00000285528.1
1.20538	-1.99966	2.47515	-0.807894	0.419152	0.595581	AC097625.1	ENSG00000285602.1
1.20483	3.05944	2.63486	1.16114	0.245584	0.396508	AC097634.4	ENSG00000285708.1
0.319474	2.21858	4.3305	0.512316	0.60843	0.767772	AC097636.1	ENSG00000285749.1
0						AC097637.1	ENSG00000173366.11
10.2816	2.9238	1.13727	2.5709	0.0101435	0.0273855	AC098484.3	ENSG00000283580.3
0						AC098582.1	ENSG00000285385.1
9.32629	1.26274	1.45105	0.870221	0.38418	0.559034	AC098588.1	ENSG00000285713.1
3.4233	-0.345204	1.29014	-0.267572	0.789029	0.906799	AC098650.1	ENSG00000283563.1
0						AC098850.3	ENSG00000266302.6
1.64119	-0.545791	2.20346	-0.247697	0.804369	0.915663	AC099489.1	ENSG00000188897.9
0						AC099811.2	ENSG00000267261.5
0						AC099850.2	ENSG00000265303.1
0						AC100868.1	ENSG00000258417.3
0.871187	0	2.99683	0	1	1	AC104109.3	ENSG00000272772.1
0						AC104151.1	ENSG00000261833.2
0						AC104304.1	ENSG00000283877.1
0.400916	0	4.40736	0	1	1	AC104389.4	ENSG00000239920.2
0						AC104389.5	ENSG00000284931.1
32.417	-0.0313483	0.392037	-0.0799627	0.936267	0.999162	AC104452.1	ENSG00000283189.2
0.0747448	0.771554	4.40736	0.175061	0.861032	0.944395	AC104472.3	ENSG00000284952.1
0.685098	1.50648	3.49512	0.431026	0.66645	0.813066	AC104532.1	ENSG00000267314.1
0						AC104581.2	ENSG00000262730.1
0						AC104662.2	ENSG00000281028.1
2.70808	0.139792	1.53173	0.0912643	0.927283	0.992822	AC105052.1	ENSG00000205236.6
1.61065	0.519946	1.9856	0.261858	0.793431	0.906799	AC105052.3	ENSG00000267645.5
0						AC106774.4	ENSG00000268799.3
9.42969	-0.131608	0.761155	-0.172906	0.862726	0.946052	AC106886.5	ENSG00000282034.1
69.0031	0.788198	0.290819	2.71027	0.00672294	0.0191824	AC107871.1	ENSG00000260007.3
0.666679	0	4.40736	0	1	1	AC107959.5	ENSG00000284956.1
0						AC108488.2	ENSG00000255767.1
0						AC108941.2	ENSG00000284695.1
0						AC109583.3	ENSG00000284672.1
0						AC110275.1	ENSG00000254673.1
9.53912	0.709152	0.709397	0.999654	0.317478	0.484896	AC112128.1	ENSG00000285943.1
0.881572	-3.26709	3.65813	-0.893104	0.371801	0.545645	AC112229.3	ENSG00000257207.5
0						AC112504.2	ENSG00000285558.1
0						AC113348.1	ENSG00000285891.1
0.245084	0	4.40736	0	1	1	AC113348.2	ENSG00000285978.1
0.0657782	0.771554	4.40736	0.175061	0.861032	0.944395	AC113554.1	ENSG00000264813.6
0.241805	0	4.40736	0	1	1	AC114490.2	ENSG00000271741.1
4.79549	4.88159	1.4719	3.31652	0.000911467	0.00325895	AC114490.3	ENSG00000284773.1
5.88441	3.89471	1.49187	2.61062	0.00903789	0.0247488	AC115220.1	ENSG00000241149.3
5.36274	-0.861815	1.00986	-0.853398	0.393438	0.568753	AC116366.3	ENSG00000283782.2
1.26878	4.52125	2.54105	1.77928	0.0751935	0.151716	AC117378.1	ENSG00000285625.1
0						AC117457.1	ENSG00000275163.1
0						AC118470.1	ENSG00000239395.2
388.764	0.277808	0.113541	2.44677	0.0144141	0.0369111	AC118549.1	ENSG00000036549.12
8.00365	0.106801	0.931332	0.114676	0.908702	0.979938	AC118553.2	ENSG00000283761.1
0						AC119396.1	ENSG00000263264.1
0.0952398	0	4.40736	0	1	1	AC119674.2	ENSG00000284686.1
0						AC119676.1	ENSG00000284895.1
0						AC120057.2	ENSG00000262526.2
2.05799	3.29085	2.21602	1.48503	0.137537	0.249462	AC120114.4	ENSG00000281348.1
0						AC124312.1	ENSG00000214265.11
0						AC126283.2	ENSG00000285330.1
38.2998	1.94837	0.383233	5.08402	3.69527e-07	2.48202e-06	AC126755.2	ENSG00000233024.7
0						AC127029.3	ENSG00000285947.1
0						AC129492.3	ENSG00000263620.1
0						AC131097.2	ENSG00000216921.8
0.0952398	0	4.40736	0	1	1	AC131160.1	ENSG00000283765.1
0						AC134669.1	ENSG00000265118.5
0						AC134684.11	ENSG00000285975.1
0						AC134684.8	ENSG00000285687.1
0						AC134684.9	ENSG00000285765.1
0						AC134980.3	ENSG00000285472.1
0.421376	-1.15201	4.34963	-0.264853	0.791123	0.906799	AC135050.2	ENSG00000255439.6
0						AC135068.1	ENSG00000182974.3
0						AC135068.3	ENSG00000279408.3
0.666679	0	4.40736	0	1	1	AC135178.2	ENSG00000263809.1
0						AC136428.1	ENSG00000259680.5
0.329838	0	4.40736	0	1	1	AC137834.1	ENSG00000258830.1
0.19048	0	4.40736	0	1	1	AC138647.1	ENSG00000226490.2
0						AC138696.1	ENSG00000264668.1
4.10506	2.25936	1.37419	1.64414	0.100148	0.192315	AC138811.2	ENSG00000260342.2
1.02459	-1.00343	2.98561	-0.33609	0.736803	0.868034	AC138894.1	ENSG00000261832.6
0						AC139491.7	ENSG00000285476.1
0						AC139530.2	ENSG00000262660.1
0						AC140504.1	ENSG00000261130.5
0						AC142391.1	ENSG00000279686.1
0						AC144573.1	ENSG00000285880.1
0						AC187653.1	ENSG00000248767.2
0						AC233723.1	ENSG00000262165.2
13.0395	-0.24383	0.735743	-0.331406	0.740338	0.870763	AC233992.2	ENSG00000271698.1
0						AC235565.2	ENSG00000284800.1
0						AC239799.1	ENSG00000213240.8
0						AC243547.3	ENSG00000280778.1
0						AC243756.1	ENSG00000270339.3
0						AC243967.1	ENSG00000267881.1
17.7981	0.924145	0.536916	1.72121	0.085213	0.168493	AC244197.3	ENSG00000241489.7
0.98025	-3.26784	3.50797	-0.931547	0.351571	0.52349	AC244517.10	ENSG00000279983.1
0						AC245033.1	ENSG00000260836.2
0						AC245748.1	ENSG00000267173.1
0						AC253536.7	ENSG00000285762.1
169.628	0.177243	0.160905	1.10154	0.270663	0.428683	ACAA1	ENSG00000060971.17
909.645	0.144149	0.0808786	1.78229	0.0747016	0.150855	ACAA2	ENSG00000167315.17
62.6673	-0.769427	0.517023	-1.48819	0.136701	0.24814	ACACA	ENSG00000278540.4
88.4139	0.741119	0.217795	3.40284	0.0006669	0.00246276	ACACB	ENSG00000076555.15
269.589	0.172919	0.137574	1.25692	0.208783	0.348114	ACAD10	ENSG00000111271.14
71.5403	0.379795	0.267844	1.41797	0.156199	0.276548	ACAD11	ENSG00000240303.7
361.349	0.184755	0.10627	1.73855	0.0821136	0.163277	ACAD8	ENSG00000151498.11
502.453	0.333582	0.0956672	3.4869	0.00048865	0.00185835	ACAD9	ENSG00000177646.18
2.97931	-0.589957	1.41089	-0.418145	0.675841	0.821942	ACADL	ENSG00000115361.7
533.397	-0.380305	0.10085	-3.77101	0.000162587	0.000685783	ACADM	ENSG00000117054.13
50.386	0.0901288	0.304534	0.295956	0.767264	0.891904	ACADS	ENSG00000122971.8
238.259	0.277102	0.154932	1.78853	0.0736898	0.149218	ACADSB	ENSG00000196177.12
1332.09	0.143121	0.061146	2.34065	0.0192502	0.047514	ACADVL	ENSG00000072778.19
2.44491	-0.571898	1.50223	-0.380701	0.703425	0.844473	ACAN	ENSG00000157766.16
0.866572	0.771545	3.42227	0.225448	0.82163	0.927482	ACAP1	ENSG00000072818.11
706.54	0.539039	0.0971312	5.5496	2.86325e-08	2.27318e-07	ACAP2	ENSG00000114331.13
844.829	-0.0458193	0.0909092	-0.504012	0.614253	0.772849	ACAP3	ENSG00000131584.18
396.902	-0.954814	0.114337	-8.35089	6.77477e-17	1.38857e-15	ACAT1	ENSG00000075239.13
331.043	-0.865556	0.121118	-7.14636	8.91085e-13	1.24151e-11	ACAT2	ENSG00000120437.8
502.517	0.57362	0.0915156	6.26801	3.65701e-10	3.68981e-09	ACBD3	ENSG00000182827.8
79.4033	0.890697	0.231405	3.84908	0.000118563	0.000514592	ACBD4	ENSG00000181513.14
543.226	0.136741	0.105861	1.29171	0.196457	0.331286	ACBD5	ENSG00000107897.18
656.817	-0.186318	0.0969515	-1.92177	0.0546348	0.116245	ACBD6	ENSG00000230124.7
108.632	1.35781	0.218595	6.21152	5.24758e-10	5.21085e-09	ACBD7	ENSG00000176244.6
89.3207	1.22909	0.280458	4.38243	1.17365e-05	6.14708e-05	ACCS	ENSG00000110455.13
0						ACCSL	ENSG00000205126.2
414.302	0.0799181	0.108896	0.73389	0.463016	0.638231	ACD	ENSG00000102977.14
2182.86	0.133775	0.0616918	2.16844	0.0301249	0.0700425	ACE	ENSG00000159640.15
0.0959768	-1.15197	4.40736	-0.261375	0.793803	0.906799	ACE2	ENSG00000130234.10
0						ACER1	ENSG00000167769.4
9.80746	0.451889	0.799968	0.564883	0.572153	0.73718	ACER2	ENSG00000177076.5
266.984	0.459192	0.128712	3.56759	0.000360279	0.00141229	ACER3	ENSG00000078124.11
166.571	1.84353	0.221634	8.3179	8.95323e-17	1.81682e-15	ACHE	ENSG00000087085.14
1704.84	-0.243398	0.0574017	-4.24026	2.23257e-05	0.000111492	ACIN1	ENSG00000100813.14
36.0741	0.892481	0.363952	2.45219	0.0141988	0.0364522	ACKR1	ENSG00000213088.10
0.633888	1.25845	3.61847	0.347786	0.728001	0.863044	ACKR2	ENSG00000144648.15
0.730476	0.380778	3.65523	0.104173	0.917032	0.985922	ACKR3	ENSG00000144476.5
1.89915	-1.13758	1.93985	-0.586427	0.557589	0.725559	ACKR4	ENSG00000129048.6
4098.62	-0.844532	0.0568658	-14.8513	6.82101e-50	1.15922e-47	ACLY	ENSG00000131473.16
1.15447	0.411553	2.80329	0.146811	0.883281	0.960972	ACMSD	ENSG00000153086.13
251.167	-0.054472	0.122567	-0.444425	0.656735	0.806825	ACO1	ENSG00000122729.18
995.405	-0.257439	0.0752529	-3.42098	0.000623952	0.00231727	ACO2	ENSG00000100412.15
0						ACOD1	ENSG00000102794.9
47.9411	1.19611	0.29809	4.01259	6.00561e-05	0.000276628	ACOT1	ENSG00000184227.7
175.845	1.04405	0.176424	5.91782	3.26239e-09	2.92772e-08	ACOT11	ENSG00000162390.17
1.20665	4.04009	3.20291	1.26138	0.207172	0.345888	ACOT12	ENSG00000172497.8
220.028	0.0378626	0.153804	0.246174	0.805548	0.916544	ACOT13	ENSG00000112304.10
364.844	0.811339	0.118948	6.82097	9.04255e-12	1.11479e-10	ACOT2	ENSG00000119673.14
19.2176	0.958285	0.456026	2.10138	0.0356074	0.0809425	ACOT4	ENSG00000177465.4
0.270663	0	4.40736	0	1	1	ACOT6	ENSG00000205669.3
544.769	-0.155697	0.110329	-1.41121	0.158182	0.279331	ACOT7	ENSG00000097021.19
184.233	0.0179776	0.147164	0.12216	0.902772	0.975395	ACOT8	ENSG00000101473.16
233.332	-0.370886	0.133874	-2.7704	0.00559867	0.0162947	ACOT9	ENSG00000123130.16
597.738	0.165915	0.0952502	1.74189	0.0815283	0.16231	ACOX1	ENSG00000161533.11
0.309856	1.63521	4.37142	0.374068	0.708353	0.846281	ACOX2	ENSG00000168306.12
106.22	-0.522868	0.219404	-2.38314	0.0171659	0.04304	ACOX3	ENSG00000087008.15
1.25957	2.98302	2.44848	1.21832	0.223104	0.367115	ACOXL	ENSG00000153093.18
1271.24	-0.0842952	0.0676397	-1.24624	0.212677	0.35302	ACP1	ENSG00000143727.15
346.299	0.144482	0.224238	0.644322	0.519367	0.690093	ACP2	ENSG00000134575.9
0						ACP4	ENSG00000142513.5
1.03633	3.91412	3.39514	1.15286	0.248967	0.400804	ACP5	ENSG00000102575.11
102.79	-0.226927	0.211871	-1.07106	0.284141	0.44536	ACP6	ENSG00000162836.11
0						ACP7	ENSG00000183760.10
0						ACPP	ENSG00000014257.15
0						ACR	ENSG00000100312.10
11.2065	-1.19313	0.671855	-1.77588	0.075753	0.152657	ACRBP	ENSG00000111644.7
3.72024	1.05519	1.19914	0.879955	0.378884	0.553153	ACRV1	ENSG00000134940.13
98.6367	0.477138	0.207214	2.30263	0.0212994	0.0518347	ACSBG1	ENSG00000103740.9
0.249841	-1.15199	4.40736	-0.261379	0.7938	0.906799	ACSBG2	ENSG00000130377.13
71.5569	1.65418	0.276248	5.98804	2.12386e-09	1.95326e-08	ACSF2	ENSG00000167107.12
123.133	0.0825929	0.217892	0.379055	0.704647	0.845504	ACSF3	ENSG00000176715.16
928.596	-0.657319	0.0826572	-7.95236	1.82996e-15	3.30996e-14	ACSL1	ENSG00000151726.13
1958.26	-0.0106688	0.0597996	-0.178409	0.858402	0.944395	ACSL3	ENSG00000123983.13
814.139	-0.545437	0.0752664	-7.24676	4.26863e-13	6.15762e-12	ACSL4	ENSG00000068366.19
1.06292	1.74921	2.68448	0.651601	0.514659	0.686618	ACSL5	ENSG00000197142.10
32.1686	1.08544	0.429322	2.52827	0.0114625	0.0303737	ACSL6	ENSG00000164398.12
0						ACSM1	ENSG00000166743.9
0						ACSM2A	ENSG00000183747.11
0						ACSM2B	ENSG00000066813.14
27.7265	0.826279	0.394977	2.09197	0.0364414	0.0825293	ACSM3	ENSG00000005187.11
0.0781918	0	4.40736	0	1	1	ACSM4	ENSG00000215009.5
0						ACSM5	ENSG00000183549.10
0						ACSM6	ENSG00000173124.14
80.7428	-0.505564	0.246168	-2.05373	0.0400014	0.0895476	ACSS1	ENSG00000154930.14
201.058	-0.86828	0.154732	-5.61151	2.00564e-08	1.62311e-07	ACSS2	ENSG00000131069.19
35.9671	-0.559679	0.431521	-1.29699	0.194634	0.328737	ACSS3	ENSG00000111058.7
5.20785	1.16188	1.05008	1.10647	0.268522	0.426037	ACTA1	ENSG00000143632.14
66.3579	2.44602	0.358881	6.81571	9.38022e-12	1.15153e-10	ACTA2	ENSG00000107796.13
18571.8	-0.519362	0.0452223	-11.4847	1.5757e-30	9.66446e-29	ACTB	ENSG00000075624.14
0						ACTBL2	ENSG00000169067.3
6.30331	-1.31225	1.09204	-1.20165	0.229501	0.375595	ACTC1	ENSG00000159251.7
19674.9	-0.170635	0.0517142	-3.29959	0.000968264	0.00343717	ACTG1	ENSG00000184009.11
0						ACTG2	ENSG00000163017.13
8.00674	-1.05098	0.984006	-1.06806	0.285494	0.447181	ACTL10	ENSG00000182584.4
707.216	0.0644141	0.0783779	0.821841	0.411168	0.587656	ACTL6A	ENSG00000136518.16
408.562	0.0300232	0.118091	0.254237	0.799313	0.911076	ACTL6B	ENSG00000077080.9
0						ACTL7A	ENSG00000187003.6
0.312154	0.77153	4.40736	0.175055	0.861036	0.944395	ACTL7B	ENSG00000148156.7
4.34755	-1.78154	1.31078	-1.35915	0.174099	0.301116	ACTL8	ENSG00000117148.7
0						ACTL9	ENSG00000181786.4
1002.16	-0.219861	0.0932691	-2.35728	0.0184095	0.0457294	ACTN1	ENSG00000072110.13
56.115	-0.0216333	0.275966	-0.0783911	0.937517	1	ACTN2	ENSG00000077522.12
0.394669	3.04045	4.29448	0.70799	0.478951	0.653526	ACTN3	ENSG00000248746.5
1235.03	0.169183	0.069347	2.43966	0.0147012	0.0375588	ACTN4	ENSG00000130402.11
364.756	0.158563	0.131854	1.20257	0.229143	0.375122	ACTR10	ENSG00000131966.13
1657.99	-0.300263	0.0607118	-4.94571	7.58661e-07	4.83687e-06	ACTR1A	ENSG00000138107.12
911.082	0.230608	0.076588	3.01102	0.00260368	0.00829021	ACTR1B	ENSG00000115073.7
2487.78	-0.122426	0.0552605	-2.21544	0.02673	0.0631296	ACTR2	ENSG00000138071.13
963.542	-0.450017	0.0894659	-5.03004	4.90374e-07	3.22339e-06	ACTR3	ENSG00000115091.11
399.583	0.304606	0.124706	2.44259	0.0145823	0.0372784	ACTR3B	ENSG00000133627.17
3.13176	0.778503	1.39424	0.558373	0.57659	0.741095	ACTR3C	ENSG00000106526.10
191.018	-0.155531	0.16205	-0.959771	0.337171	0.50728	ACTR5	ENSG00000101442.9
163.244	-0.894977	0.160835	-5.56455	2.62828e-08	2.10095e-07	ACTR6	ENSG00000075089.9
338.356	0.342163	0.120368	2.84264	0.00447417	0.013384	ACTR8	ENSG00000113812.13
0						ACTRT1	ENSG00000123165.8
0						ACTRT2	ENSG00000169717.6
16.6334	3.10692	0.706354	4.39853	1.08987e-05	5.74329e-05	ACTRT3	ENSG00000184378.2
186.885	0.146427	0.159561	0.91769	0.358781	0.531298	ACVR1	ENSG00000115170.13
1435.22	-0.149765	0.0657714	-2.27705	0.022783	0.0549939	ACVR1B	ENSG00000135503.12
2.11257	4.90586	2.07156	2.3682	0.0178751	0.0445654	ACVR1C	ENSG00000123612.15
225.802	0.217429	0.145587	1.49346	0.135317	0.246037	ACVR2A	ENSG00000121989.14
999.482	-1.19698	0.0810638	-14.7659	2.4298e-49	3.96422e-47	ACVR2B	ENSG00000114739.13
36.3181	0.181125	0.32949	0.549715	0.582515	0.74621	ACVRL1	ENSG00000139567.12
30.6448	-1.09851	0.409149	-2.68486	0.0072561	0.0205064	ACY1	ENSG00000243989.8
0.534344	2.91359	4.29881	0.677766	0.49792	0.671036	ACY3	ENSG00000132744.7
53.3972	0.47238	0.337682	1.39889	0.161846	0.284293	ACYP1	ENSG00000119640.8
26.9331	0.624188	0.511628	1.22	0.222464	0.366209	ACYP2	ENSG00000170634.12
3.51237	0.397686	1.62331	0.244984	0.806469	0.916901	AD000671.1	ENSG00000188223.9
0.503247	0	4.40736	0	1	1	AD000671.2	ENSG00000267120.3
35.4077	-1.31666	0.360608	-3.65123	0.00026099	0.00105397	ADA	ENSG00000196839.12
1.20791	0.136612	2.50132	0.0546162	0.956444	1	ADA2	ENSG00000093072.16
0						ADAD1	ENSG00000164113.10
0.415098	0.771527	4.40736	0.175054	0.861037	0.944395	ADAD2	ENSG00000140955.10
127.797	0.199215	0.227428	0.875948	0.381059	0.555533	ADAL	ENSG00000168803.15
1026.39	0.201355	0.0850512	2.36746	0.0179107	0.04464	ADAM10	ENSG00000137845.14
284.564	-0.0990716	0.121249	-0.817089	0.413877	0.590555	ADAM11	ENSG00000073670.13
2253.07	0.568304	0.0491962	11.5518	7.22883e-31	4.5536e-29	ADAM12	ENSG00000148848.14
650.511	0.141337	0.0782239	1.80683	0.0707889	0.144221	ADAM15	ENSG00000143537.13
460.603	0.169226	0.106982	1.58181	0.113693	0.213231	ADAM17	ENSG00000151694.13
0						ADAM18	ENSG00000168619.15
183.229	0.0756432	0.174401	0.43373	0.664484	0.811214	ADAM19	ENSG00000135074.15
0						ADAM2	ENSG00000104755.14
1.77671	3.92018	4.2729	0.917453	0.358905	0.53131	ADAM20	ENSG00000134007.3
4.25151	-0.14262	1.34343	-0.106161	0.915455	0.984876	ADAM21	ENSG00000139985.6
865.357	0.313723	0.0857297	3.65944	0.000252765	0.00102304	ADAM22	ENSG00000008277.14
1160.15	0.0190953	0.0721801	0.264551	0.791356	0.906799	ADAM23	ENSG00000114948.12
0						ADAM28	ENSG00000042980.12
12.518	2.16322	0.785194	2.75501	0.00586899	0.0169804	ADAM29	ENSG00000168594.15
0						ADAM30	ENSG00000134249.6
10.4837	1.43434	0.716817	2.00098	0.0453943	0.0996111	ADAM32	ENSG00000197140.14
0.568328	0	4.40736	0	1	1	ADAM33	ENSG00000149451.17
0						ADAM7	ENSG00000069206.15
14.8598	-0.358683	0.605236	-0.592633	0.553427	0.721698	ADAM8	ENSG00000151651.15
173.565	0.258458	0.193362	1.33666	0.181335	0.310601	ADAM9	ENSG00000168615.11
0						ADAMDEC1	ENSG00000134028.14
267.762	-0.348023	0.13349	-2.60712	0.00913085	0.0249782	ADAMTS1	ENSG00000154734.14
95.1553	-0.451205	0.221851	-2.03382	0.0419698	0.0931742	ADAMTS10	ENSG00000142303.13
1.13781	1.41197	2.5148	0.561466	0.57448	0.739214	ADAMTS12	ENSG00000151388.10
339.857	0.983477	0.135526	7.25672	3.96588e-13	5.7412e-12	ADAMTS13	ENSG00000160323.18
31.9141	-1.41876	0.403576	-3.51548	0.000438966	0.00169108	ADAMTS14	ENSG00000138316.10
12.9369	4.75873	1.15332	4.12613	3.68921e-05	0.000176612	ADAMTS15	ENSG00000166106.3
2.66222	0.633197	1.43292	0.441894	0.658566	0.808587	ADAMTS16	ENSG00000145536.15
527.738	-0.691553	0.105851	-6.53324	6.43603e-11	7.14798e-10	ADAMTS17	ENSG00000140470.13
0.0834625	0	4.40736	0	1	1	ADAMTS18	ENSG00000140873.15
230.757	0.135281	0.152194	0.888869	0.374074	0.547896	ADAMTS19	ENSG00000145808.9
3167.68	-0.45132	0.0580876	-7.76964	7.87098e-15	1.35602e-13	ADAMTS2	ENSG00000087116.15
170.031	-0.406867	0.205669	-1.97826	0.0478993	0.104225	ADAMTS20	ENSG00000173157.16
63.2386	0.381352	0.29306	1.30128	0.193163	0.326711	ADAMTS3	ENSG00000156140.9
8.04351	1.16901	0.811135	1.44121	0.149526	0.267081	ADAMTS4	ENSG00000158859.9
210.126	0.322211	0.172215	1.87098	0.0613481	0.128303	ADAMTS5	ENSG00000154736.5
43.0656	-0.804255	0.313358	-2.56657	0.0102711	0.0276796	ADAMTS6	ENSG00000049192.14
464.156	-0.658836	0.097841	-6.73375	1.65349e-11	1.97776e-10	ADAMTS7	ENSG00000136378.14
3.24431	0.830533	1.54482	0.537625	0.590836	0.754028	ADAMTS8	ENSG00000134917.9
1034.44	0.904217	0.0881207	10.2611	1.05477e-24	4.12094e-23	ADAMTS9	ENSG00000163638.13
1.95884	-1.55798	2.17167	-0.717413	0.473119	0.648557	ADAMTSL1	ENSG00000178031.16
310.121	-0.179045	0.150679	-1.18825	0.234734	0.382853	ADAMTSL2	ENSG00000197859.9
5.32434	3.42989	1.57284	2.1807	0.0292055	0.0682941	ADAMTSL3	ENSG00000156218.12
12.826	1.05093	0.878506	1.19627	0.231592	0.378409	ADAMTSL4	ENSG00000143382.14
0.0810746	-1.15197	4.40736	-0.261375	0.793803	0.906799	ADAMTSL5	ENSG00000185761.10
43.4928	-0.901669	0.306124	-2.94544	0.00322501	0.0100183	ADAP1	ENSG00000105963.14
0.912252	2.47088	3.31846	0.744587	0.456521	0.632092	ADAP2	ENSG00000184060.10
2626.36	-0.355747	0.0532504	-6.68065	2.37886e-11	2.80022e-10	ADAR	ENSG00000160710.16
196.026	0.658644	0.1523	4.32464	1.52778e-05	7.8531e-05	ADARB1	ENSG00000197381.15
15.0078	-0.0713083	0.586367	-0.12161	0.903208	0.975636	ADARB2	ENSG00000185736.15
260.334	0.29096	0.127633	2.27966	0.0226279	0.05466	ADAT1	ENSG00000065457.10
75.9788	-1.12844	0.293127	-3.84967	0.000118277	0.000513627	ADAT2	ENSG00000189007.15
93.4211	0.368171	0.215556	1.70801	0.0876347	0.172364	ADAT3	ENSG00000213638.5
74.0074	-0.212439	0.29043	-0.731463	0.464496	0.639731	ADCK1	ENSG00000063761.15
279.877	0.162345	0.127659	1.27171	0.203476	0.340798	ADCK2	ENSG00000133597.10
140.53	1.05463	0.195399	5.39735	6.76337e-08	5.05703e-07	ADCK5	ENSG00000173137.11
1504.53	0.29104	0.0704706	4.12995	3.62834e-05	0.000173851	ADCY1	ENSG00000164742.15
2.055	3.49182	1.90237	1.83551	0.0664303	0.137018	ADCY10	ENSG00000143199.17
0.292574	2.0495	4.34075	0.472154	0.636817	0.790345	ADCY2	ENSG00000078295.16
695.9	-0.0776694	0.0838226	-0.926592	0.354138	0.52616	ADCY3	ENSG00000138031.14
0.568387	0	3.81038	0	1	1	ADCY4	ENSG00000129467.13
211.768	-0.198663	0.158444	-1.25384	0.2099	0.34937	ADCY5	ENSG00000173175.14
1219.46	0.684797	0.0780207	8.77711	1.67722e-18	3.9773e-17	ADCY6	ENSG00000174233.11
524.743	-0.203792	0.0995315	-2.04751	0.040608	0.0907189	ADCY7	ENSG00000121281.12
3.43811	4.58924	1.75014	2.62222	0.00873599	0.024031	ADCY8	ENSG00000155897.9
420.438	-0.395023	0.109631	-3.60319	0.000314332	0.00124868	ADCY9	ENSG00000162104.9
1688.95	0.0144047	0.0683593	0.210721	0.833105	0.936289	ADCYAP1	ENSG00000141433.12
894.565	-0.496677	0.078368	-6.33775	2.33139e-10	2.4258e-09	ADCYAP1R1	ENSG00000078549.14
2118.17	-0.0827211	0.0530988	-1.55787	0.119264	0.221793	ADD1	ENSG00000087274.16
2141.7	0.000723252	0.0555111	0.013029	0.989605	1	ADD2	ENSG00000075340.22
1351.68	0.0480873	0.0635536	0.756642	0.449265	0.625299	ADD3	ENSG00000148700.14
0.439253	2.88648	4.29979	0.671307	0.502025	0.674729	ADGB	ENSG00000118492.16
0.6677	0	4.40736	0	1	1	ADGRA1	ENSG00000197177.15
307.764	-0.341449	0.128244	-2.66249	0.00775645	0.0217434	ADGRA2	ENSG00000020181.17
1276.21	-0.547928	0.0654995	-8.36537	5.9927e-17	1.24075e-15	ADGRA3	ENSG00000152990.13
308.498	-0.0767919	0.12993	-0.591026	0.554503	0.722812	ADGRB1	ENSG00000181790.11
749.169	-0.247139	0.082393	-2.99951	0.00270412	0.00857321	ADGRB2	ENSG00000121753.12
312.038	0.168963	0.116652	1.44844	0.147494	0.264014	ADGRB3	ENSG00000135298.13
14.0193	1.11108	0.693317	1.60256	0.109031	0.206171	ADGRD1	ENSG00000111452.12
3.2177	1.04433	1.62308	0.643426	0.519948	0.690457	ADGRD2	ENSG00000180264.11
0						ADGRE1	ENSG00000174837.14
0						ADGRE2	ENSG00000127507.17
0						ADGRE3	ENSG00000131355.14
9.15879	5.76351	1.34501	4.28511	1.82647e-05	9.27158e-05	ADGRE5	ENSG00000123146.19
0						ADGRF1	ENSG00000153292.15
0						ADGRF2	ENSG00000164393.8
15.1616	1.49267	0.717993	2.07895	0.0376219	0.0848965	ADGRF3	ENSG00000173567.14
0						ADGRF4	ENSG00000153294.11
0						ADGRF5	ENSG00000069122.18
120.366	0.232636	0.222287	1.04656	0.295303	0.45867	ADGRG1	ENSG00000205336.11
2.95599	2.81967	1.80025	1.56627	0.117286	0.218939	ADGRG2	ENSG00000173698.17
0.0821252	0	4.40736	0	1	1	ADGRG3	ENSG00000182885.16
0.0834625	0	4.40736	0	1	1	ADGRG4	ENSG00000156920.10
0.478037	1.6352	4.37142	0.374066	0.708355	0.846281	ADGRG5	ENSG00000159618.15
77.4212	0.6472	0.233091	2.7766	0.00549315	0.0160266	ADGRG6	ENSG00000112414.14
0						ADGRG7	ENSG00000144820.7
1874.97	-0.38193	0.0601701	-6.3475	2.1884e-10	2.2887e-09	ADGRL1	ENSG00000072071.16
955.025	-0.158275	0.0744889	-2.12481	0.0336021	0.0769644	ADGRL2	ENSG00000117114.19
86.5019	-0.607915	0.277767	-2.18858	0.0286273	0.0671633	ADGRL3	ENSG00000150471.16
0						ADGRL4	ENSG00000162618.13
2.66374	1.1748	1.68484	0.697276	0.48563	0.6602	ADGRV1	ENSG00000164199.17
0						ADH1A	ENSG00000187758.7
0.459273	3.23815	4.28844	0.755088	0.450196	0.626151	ADH1B	ENSG00000196616.13
0						ADH1C	ENSG00000248144.5
0						ADH4	ENSG00000198099.8
956.928	-0.353579	0.0662816	-5.3345	9.58083e-08	7.00319e-07	ADH5	ENSG00000197894.10
0						ADH6	ENSG00000172955.17
0						ADH7	ENSG00000196344.11
18.5115	2.49763	0.592045	4.21865	2.45771e-05	0.000121803	ADHFE1	ENSG00000147576.16
150.266	0.27636	0.212407	1.30109	0.193229	0.326789	ADI1	ENSG00000182551.13
0						ADIG	ENSG00000182035.11
1.60648	3.97031	2.42012	1.64054	0.100893	0.193564	ADIPOQ	ENSG00000181092.9
555.083	0.494354	0.0907161	5.44946	5.0523e-08	3.85539e-07	ADIPOR1	ENSG00000159346.12
778.868	0.328024	0.089711	3.65645	0.00025573	0.00103427	ADIPOR2	ENSG00000006831.9
0.0834625	0	4.40736	0	1	1	ADIRF	ENSG00000148671.13
402.484	-0.251	0.112692	-2.22731	0.0259263	0.0614629	ADK	ENSG00000156110.13
55.3195	1.02162	0.308094	3.31595	0.000913316	0.00326484	ADM	ENSG00000148926.9
36.0451	0.196127	0.360047	0.544726	0.585942	0.749599	ADM2	ENSG00000128165.8
42.2897	-2.7129	0.372232	-7.28821	3.14107e-13	4.60022e-12	ADM5	ENSG00000224420.3
1857.57	-0.579088	0.0638418	-9.07068	1.18279e-19	3.08262e-18	ADNP	ENSG00000101126.16
740.008	-0.109043	0.0998416	-1.09216	0.274764	0.433579	ADNP2	ENSG00000101544.8
573.279	-0.185851	0.111498	-1.66686	0.095543	0.185041	ADO	ENSG00000181915.4
46.4199	-1.0413	0.338371	-3.07738	0.00208826	0.00681537	ADORA1	ENSG00000163485.16
1.88207	-1.24697	1.62665	-0.766587	0.443327	0.619784	ADORA2A	ENSG00000128271.21
47.1803	0.0770555	0.338242	0.227812	0.819792	0.926038	ADORA2B	ENSG00000170425.3
0						ADORA3	ENSG00000282608.1
530.237	0.00677301	0.0934995	0.072439	0.942253	1	ADPGK	ENSG00000159322.17
13.288	2.08049	0.693033	3.00201	0.00268202	0.00851202	ADPRH	ENSG00000144843.11
81.5634	0.345209	0.266922	1.2933	0.195908	0.330462	ADPRHL1	ENSG00000153531.13
112.824	0.139778	0.192956	0.724404	0.468818	0.643998	ADPRHL2	ENSG00000116863.10
42.9169	-0.400816	0.391537	-1.0237	0.305977	0.471478	ADPRM	ENSG00000170222.11
0.837784	2.05964	3.52228	0.584745	0.558719	0.72674	ADRA1A	ENSG00000120907.17
6.19144	2.31353	1.20419	1.92124	0.0547016	0.116342	ADRA1B	ENSG00000170214.4
1.38999	1.68745	2.66157	0.634005	0.526077	0.696216	ADRA1D	ENSG00000171873.7
94.9387	0.644839	0.28036	2.30004	0.021446	0.052137	ADRA2A	ENSG00000150594.6
7.90341	2.58725	1.0211	2.53379	0.0112837	0.0299778	ADRA2B	ENSG00000274286.1
339.728	-0.46058	0.123391	-3.73269	0.000189447	0.000787071	ADRA2C	ENSG00000184160.7
0.0861957	-1.15197	4.40736	-0.261375	0.793803	0.906799	ADRB1	ENSG00000043591.5
4.25855	1.77721	1.15091	1.54419	0.122543	0.227037	ADRB2	ENSG00000169252.5
0						ADRB3	ENSG00000188778.5
821.838	-0.153752	0.0784583	-1.95967	0.0500349	0.108106	ADRM1	ENSG00000130706.12
368.176	-0.768669	0.112596	-6.82681	8.68224e-12	1.07311e-10	ADSL	ENSG00000239900.12
637.278	-0.899422	0.0914566	-9.83442	8.00272e-23	2.65915e-21	ADSS	ENSG00000035687.9
61.7492	3.65462	0.418324	8.73634	2.40781e-18	5.66044e-17	ADSSL1	ENSG00000185100.10
0						ADTRP	ENSG00000111863.12
1365.84	0.470158	0.0757106	6.20993	5.30081e-10	5.2605e-09	AEBP1	ENSG00000106624.10
326.828	0.0816074	0.116747	0.699013	0.484544	0.658943	AEBP2	ENSG00000139154.14
647.314	-0.1799	0.090859	-1.98	0.047704	0.103897	AEN	ENSG00000181026.14
2145.45	-0.281779	0.0756849	-3.72305	0.000196827	0.000814828	AES	ENSG00000104964.14
0						AF241726.2	ENSG00000250349.3
1755.35	-0.467591	0.0625306	-7.4778	7.55783e-14	1.18906e-12	AFAP1	ENSG00000196526.10
86.06	0.00103193	0.233198	0.00442512	0.996469	1	AFAP1L1	ENSG00000157510.13
39.6381	1.00523	0.374516	2.68408	0.00727305	0.0205414	AFAP1L2	ENSG00000169129.14
603.279	-0.283382	0.0912062	-3.10705	0.00188966	0.0062295	AFDN	ENSG00000130396.20
771.557	-0.187257	0.0882361	-2.12223	0.0338186	0.0774169	AFF1	ENSG00000172493.20
23.4555	1.37799	0.544462	2.53092	0.0113763	0.0301844	AFF2	ENSG00000155966.13
256.39	0.0790197	0.137106	0.57634	0.564386	0.731022	AFF3	ENSG00000144218.18
1967.45	0.196044	0.0721357	2.71772	0.00657344	0.0188183	AFF4	ENSG00000072364.12
18.9715	0.516413	0.503418	1.02581	0.304979	0.470519	AFG1L	ENSG00000135537.16
771.97	-0.244851	0.0829516	-2.95173	0.00315994	0.00984992	AFG3L2	ENSG00000141385.9
0						AFM	ENSG00000079557.4
145.689	-0.282573	0.177942	-1.58801	0.112285	0.211075	AFMID	ENSG00000183077.15
0						AFP	ENSG00000081051.7
367.877	0.205018	0.111156	1.84442	0.0651213	0.134863	AFTPH	ENSG00000119844.15
40.406	0.27932	0.347928	0.802809	0.422085	0.598614	AGA	ENSG00000038002.8
2897.44	0.126922	0.0581616	2.18223	0.0290925	0.0681078	AGAP1	ENSG00000157985.18
841.904	0.518317	0.0937384	5.52939	3.2134e-08	2.52537e-07	AGAP2	ENSG00000135439.11
1129.36	-0.0596512	0.0705391	-0.845648	0.397749	0.57346	AGAP3	ENSG00000133612.18
151.773	0.062038	0.327895	0.189201	0.849935	0.944395	AGAP4	ENSG00000188234.13
6.23726	-0.13573	1.00148	-0.135529	0.892194	0.967635	AGAP5	ENSG00000172650.13
238.988	0.341157	0.149983	2.27463	0.0229278	0.0553027	AGAP6	ENSG00000204149.10
153.454	0.694189	0.183794	3.777	0.000158728	0.000671937	AGAP9	ENSG00000204172.12
33.201	-0.238661	0.386721	-0.617141	0.537142	0.707232	AGBL1	ENSG00000273540.3
0.0781918	0	4.40736	0	1	1	AGBL2	ENSG00000165923.15
47.1441	1.93197	0.354481	5.45014	5.03306e-08	3.84251e-07	AGBL3	ENSG00000146856.14
20.5681	2.0228	0.539973	3.74611	0.000179596	0.000749965	AGBL4	ENSG00000186094.16
696.764	0.77217	0.0922133	8.37374	5.58183e-17	1.15715e-15	AGBL5	ENSG00000084693.15
0						AGER	ENSG00000204305.13
949.382	-0.0863794	0.0689683	-1.25245	0.210406	0.349962	AGFG1	ENSG00000173744.17
75.8737	0.265343	0.254817	1.04131	0.297732	0.461345	AGFG2	ENSG00000106351.12
317.505	0.248869	0.125111	1.98918	0.0466812	0.101982	AGGF1	ENSG00000164252.12
138.673	-0.911133	0.236006	-3.86063	0.000113096	0.000493226	AGK	ENSG00000006530.16
381.723	0.23792	0.11455	2.077	0.0378014	0.0852544	AGL	ENSG00000162688.16
0.0959768	-1.15197	4.40736	-0.261375	0.793803	0.906799	AGMAT	ENSG00000116771.5
0.624698	3.26176	4.21938	0.773043	0.439497	0.616119	AGMO	ENSG00000187546.13
439.313	-0.296719	0.10053	-2.95154	0.0031619	0.00985413	AGO1	ENSG00000092847.11
1094.79	-0.780881	0.0669007	-11.6722	1.76735e-31	1.14422e-29	AGO2	ENSG00000123908.11
286.46	0.587111	0.128358	4.57399	4.78512e-06	2.68741e-05	AGO3	ENSG00000126070.19
138.137	-0.145102	0.196215	-0.739507	0.459599	0.634916	AGO4	ENSG00000134698.10
111.223	0.506223	0.209599	2.4152	0.0157265	0.039866	AGPAT1	ENSG00000204310.12
6.02945	2.07779	1.11116	1.86992	0.0614948	0.128528	AGPAT2	ENSG00000169692.12
627.217	-0.596521	0.0905512	-6.58767	4.46773e-11	5.05135e-10	AGPAT3	ENSG00000160216.18
206.038	0.247075	0.14795	1.66999	0.0949223	0.183926	AGPAT4	ENSG00000026652.13
1390.49	-0.431514	0.0778251	-5.54466	2.94521e-08	2.33485e-07	AGPAT5	ENSG00000155189.11
1306.75	-0.0338302	0.0795079	-0.425495	0.670476	0.817061	AGPS	ENSG00000018510.14
0.149241	0.771545	4.40736	0.175058	0.861034	0.944395	AGR2	ENSG00000106541.11
0						AGR3	ENSG00000173467.8
160.286	1.78754	0.190144	9.40096	5.40673e-21	1.55575e-19	AGRN	ENSG00000188157.14
0						AGRP	ENSG00000159723.4
0						AGT	ENSG00000135744.7
794.112	0.018951	0.0799081	0.23716	0.812533	0.921292	AGTPBP1	ENSG00000135049.15
3.72454	-0.446739	1.27291	-0.350959	0.725619	0.860667	AGTR1	ENSG00000144891.17
0						AGTR2	ENSG00000180772.6
55.4304	0.284492	0.301365	0.944011	0.345164	0.516259	AGTRAP	ENSG00000177674.15
0						AGXT	ENSG00000172482.4
0						AGXT2	ENSG00000113492.13
1185.83	0.188482	0.0720144	2.61728	0.00886336	0.024328	AHCTF1	ENSG00000153207.15
2171.51	-1.20058	0.0669726	-17.9265	7.32958e-72	4.27079e-69	AHCY	ENSG00000101444.12
1304.38	-0.210008	0.0605681	-3.46731	0.000525704	0.00198493	AHCYL1	ENSG00000168710.17
259.375	0.606588	0.140534	4.31631	1.58657e-05	8.12713e-05	AHCYL2	ENSG00000158467.16
120.85	-0.204164	0.203609	-1.00273	0.315993	0.483148	AHDC1	ENSG00000126705.14
245.021	-0.10519	0.134089	-0.784476	0.432761	0.609597	AHI1	ENSG00000135541.20
8982.35	0.91911	0.0626259	14.6762	9.15836e-49	1.43672e-46	AHNAK	ENSG00000124942.13
182.009	2.21144	0.183758	12.0345	2.34076e-33	1.69731e-31	AHNAK2	ENSG00000185567.6
140.059	1.20831	0.238692	5.0622	4.14439e-07	2.7587e-06	AHR	ENSG00000106546.13
341.169	-0.138794	0.126021	-1.10136	0.27074	0.428764	AHRR	ENSG00000063438.16
936.411	-0.153933	0.0795433	-1.93521	0.0529642	0.113341	AHSA1	ENSG00000100591.7
3.84484	-0.371392	1.49191	-0.248938	0.803409	0.914698	AHSG	ENSG00000145192.12
0						AHSP	ENSG00000169877.9
0						AICDA	ENSG00000111732.10
519.555	-0.189055	0.0878384	-2.15231	0.0313733	0.0725624	AIDA	ENSG00000186063.12
0						AIF1	ENSG00000204472.12
33.2416	0.24224	0.39884	0.607362	0.543611	0.712428	AIF1L	ENSG00000126878.12
345.623	-0.353869	0.110513	-3.20206	0.00136449	0.00467093	AIFM1	ENSG00000156709.13
65.9456	1.84972	0.316067	5.85231	4.84803e-09	4.26621e-08	AIFM2	ENSG00000042286.14
15.8019	0.160567	0.613173	0.261862	0.793428	0.906799	AIFM3	ENSG00000183773.15
158.75	0.415623	0.171972	2.4168	0.0156576	0.0397099	AIG1	ENSG00000146416.18
15.8856	1.1085	0.696825	1.59079	0.111658	0.210164	AIM2	ENSG00000163568.14
297.755	-1.00686	0.138094	-7.29113	3.07358e-13	4.50948e-12	AIMP1	ENSG00000164022.16
443.671	-0.546038	0.11922	-4.5801	4.64749e-06	2.61732e-05	AIMP2	ENSG00000106305.9
288.853	-0.960724	0.123711	-7.76587	8.10877e-15	1.39404e-13	AIP	ENSG00000110711.9
0.166925	0	4.40736	0	1	1	AIPL1	ENSG00000129221.15
0						AIRE	ENSG00000160224.16
417.915	-0.311015	0.116252	-2.67535	0.0074651	0.0210169	AJAP1	ENSG00000196581.10
72.9457	-0.434693	0.304923	-1.42558	0.153989	0.273079	AJM1	ENSG00000232434.2
13.888	-2.33249	0.73009	-3.1948	0.0013993	0.00477805	AJUBA	ENSG00000129474.15
101.295	0.44142	0.268645	1.64314	0.100354	0.192644	AK1	ENSG00000106992.18
629.434	-0.475617	0.097683	-4.86898	1.12175e-06	6.97462e-06	AK2	ENSG00000004455.16
678.156	0.102292	0.0755115	1.35465	0.175529	0.302958	AK3	ENSG00000147853.16
577.374	-0.826791	0.0908597	-9.09964	9.06284e-20	2.37717e-18	AK4	ENSG00000162433.14
54.7544	-0.485013	0.295833	-1.63948	0.101113	0.193963	AK5	ENSG00000154027.18
0						AK6	ENSG00000085231.13
60.2827	0.62733	0.305685	2.05221	0.0401491	0.0898413	AK7	ENSG00000140057.8
1.94158	2.79416	1.93449	1.44439	0.148628	0.265798	AK8	ENSG00000165695.9
36.3188	0.666598	0.400288	1.6653	0.0958535	0.185488	AK9	ENSG00000155085.15
1.8108	-1.25968	2.31333	-0.544531	0.586076	0.749712	AKAIN1	ENSG00000231824.3
1420.94	-0.855518	0.0644509	-13.2739	3.27881e-40	3.54264e-38	AKAP1	ENSG00000121057.12
248.985	0.0984567	0.16068	0.612751	0.540041	0.710099	AKAP10	ENSG00000108599.14
1586.77	0.00301549	0.0667608	0.0451685	0.963973	1	AKAP11	ENSG00000023516.8
746.642	0.0172825	0.0752831	0.229567	0.818429	0.925232	AKAP12	ENSG00000131016.16
910.635	-0.188277	0.0835373	-2.25381	0.0242083	0.0580565	AKAP13	ENSG00000170776.21
0.571439	0	4.40736	0	1	1	AKAP14	ENSG00000186471.12
0.0810746	-1.15197	4.40736	-0.261375	0.793803	0.906799	AKAP17A	ENSG00000197976.11
2.78398	-0.0737416	1.44874	-0.0509005	0.959405	1	AKAP2	ENSG00000241978.9
6.02434	2.07647	1.0187	2.03834	0.0415155	0.0923165	AKAP3	ENSG00000111254.7
27.7329	1.77567	0.422705	4.20073	2.66055e-05	0.000130862	AKAP4	ENSG00000147081.14
85.9839	-0.0579741	0.216629	-0.267619	0.788993	0.906799	AKAP5	ENSG00000179841.8
317.175	0.299735	0.117414	2.55279	0.0106863	0.0286378	AKAP6	ENSG00000151320.10
30.9743	0.583446	0.394718	1.47813	0.139373	0.25226	AKAP7	ENSG00000118507.16
367.753	0.216497	0.108101	2.00274	0.0452055	0.0993035	AKAP8	ENSG00000105127.8
1544.27	1.35317	0.0780298	17.3417	2.27995e-67	1.00534e-64	AKAP8L	ENSG00000011243.17
850.709	-0.00108247	0.0852379	-0.0126994	0.989868	1	AKAP9	ENSG00000127914.16
147.214	0.0585345	0.187352	0.312431	0.754713	0.882283	AKIP1	ENSG00000166452.11
443.017	0.0330618	0.106035	0.311802	0.755191	0.882649	AKIRIN1	ENSG00000174574.15
483.786	-0.0287382	0.0909531	-0.315968	0.752027	0.880364	AKIRIN2	ENSG00000135334.8
70.9812	-0.26856	0.279836	-0.959707	0.337203	0.507281	AKNA	ENSG00000106948.16
2.90909	4.87908	3.67743	1.32676	0.184587	0.314916	AKNAD1	ENSG00000162641.18
641.435	-0.63864	0.0902792	-7.07405	1.50473e-12	2.01329e-11	AKR1A1	ENSG00000117448.13
1754.51	-0.132583	0.0624471	-2.12312	0.0337435	0.0772774	AKR1B1	ENSG00000085662.13
0.0781918	0	4.40736	0	1	1	AKR1B10	ENSG00000198074.9
0						AKR1B15	ENSG00000227471.8
62.112	-0.414444	0.271563	-1.52614	0.126974	0.233628	AKR1C1	ENSG00000187134.13
57.7846	-0.291024	0.271236	-1.07295	0.283292	0.444201	AKR1C2	ENSG00000151632.17
40.3106	1.93828	0.385892	5.02285	5.09111e-07	3.3358e-06	AKR1C3	ENSG00000196139.13
0						AKR1C4	ENSG00000198610.10
0						AKR1C8P	ENSG00000264006.8
0						AKR1D1	ENSG00000122787.14
46.6041	0.370212	0.349486	1.05931	0.289461	0.451962	AKR1E2	ENSG00000165568.17
163.422	0.328261	0.157349	2.08619	0.0369613	0.0835791	AKR7A2	ENSG00000053371.12
3.56279	-2.42528	1.16748	-2.07737	0.0377678	0.0851903	AKR7A3	ENSG00000162482.4
1870.97	-0.210617	0.0507687	-4.14857	3.34565e-05	0.000161683	AKT1	ENSG00000142208.16
500.678	-0.547617	0.103524	-5.28978	1.22466e-07	8.84086e-07	AKT1S1	ENSG00000204673.10
1466.6	-0.247368	0.0583271	-4.24105	2.2248e-05	0.000111145	AKT2	ENSG00000105221.16
53.3341	-1.35436	0.700665	-1.93296	0.0532406	0.113858	AKT3	ENSG00000117020.16
209.985	0.449281	0.170907	2.6288	0.00856869	0.0236465	AKTIP	ENSG00000166971.16
0						AL020996.2	ENSG00000255054.3
0.739914	-4.13062	3.77897	-1.09305	0.27437	0.433083	AL021546.1	ENSG00000111780.8
0						AL021997.3	ENSG00000276302.1
9.66669	0.361969	0.887771	0.407728	0.683474	0.828199	AL022238.4	ENSG00000284431.1
0						AL022312.1	ENSG00000285025.1
0						AL022318.4	ENSG00000284554.2
0						AL024498.2	ENSG00000272162.1
1.02631	-0.171322	2.16746	-0.0790429	0.936999	0.999747	AL031281.2	ENSG00000285721.1
0						AL031315.1	ENSG00000285733.1
1.05595	-2.63807	2.93376	-0.899212	0.36854	0.54241	AL031708.1	ENSG00000261732.1
10.4274	0.880862	0.706352	1.24706	0.212376	0.352663	AL031777.3	ENSG00000282988.2
0.0918546	0.771554	4.40736	0.175061	0.861032	0.944395	AL031847.2	ENSG00000285629.1
2.03211	4.00633	1.92333	2.08301	0.0372499	0.084185	AL032819.3	ENSG00000284395.1
0						AL033529.1	ENSG00000254553.1
0						AL034430.1	ENSG00000285508.1
0						AL034430.2	ENSG00000285723.1
0						AL035078.4	ENSG00000285283.1
0						AL035425.2	ENSG00000260548.1
0						AL035460.1	ENSG00000241690.3
0.344783	-3.02709	4.30888	-0.702525	0.482352	0.65669	AL049557.1	ENSG00000284755.1
0						AL049629.2	ENSG00000284969.1
0.0810746	-1.15197	4.40736	-0.261375	0.793803	0.906799	AL049634.2	ENSG00000260861.6
0.674642	1.34541	3.6345	0.370177	0.711251	0.848622	AL049650.1	ENSG00000256566.1
1.36538	-2.03272	2.57958	-0.788001	0.430696	0.607592	AL049697.1	ENSG00000213204.8
0.839908	2.06587	3.20636	0.644304	0.519378	0.690093	AL049779.1	ENSG00000258466.5
0.33385	0	4.40736	0	1	1	AL049839.2	ENSG00000273259.3
0						AL049844.1	ENSG00000257065.1
0						AL049844.3	ENSG00000280148.1
0.243224	-2.53122	4.33397	-0.584041	0.559193	0.726777	AL080251.1	ENSG00000255275.3
136.742	0.120306	0.199978	0.601595	0.547444	0.715783	AL096711.2	ENSG00000255330.9
0						AL096814.1	ENSG00000214732.2
0						AL096870.1	ENSG00000258973.1
0						AL109811.4	ENSG00000277726.4
0						AL109827.1	ENSG00000272897.5
0						AL110118.2	ENSG00000259066.5
7.75043	-0.537492	0.770979	-0.697156	0.485705	0.660218	AL117339.5	ENSG00000283930.1
0.407234	-1.95023	4.37641	-0.445623	0.65587	0.806226	AL117348.2	ENSG00000255835.1
0						AL121578.2	ENSG00000229674.2
0.671705	-0.236974	3.08671	-0.0767723	0.938805	1	AL121594.1	ENSG00000258790.1
0						AL121722.1	ENSG00000283932.1
0.323244	0	4.40736	0	1	1	AL121753.1	ENSG00000261582.1
0						AL121758.1	ENSG00000270299.1
0						AL121845.2	ENSG00000273047.1
89.9207	-0.46539	0.247743	-1.87852	0.0603099	0.126554	AL121845.3	ENSG00000273154.3
0.160366	0	4.40736	0	1	1	AL121900.2	ENSG00000284776.1
0						AL132671.2	ENSG00000282218.1
0						AL132780.3	ENSG00000259132.1
5.28518	3.19756	1.47122	2.17341	0.0297495	0.0693178	AL133352.1	ENSG00000255339.6
1.64674	-0.772526	2.22947	-0.346507	0.728962	0.863769	AL133353.2	ENSG00000285932.1
0						AL133410.3	ENSG00000285645.1
0.498124	0	4.40736	0	1	1	AL133500.1	ENSG00000285547.1
278.296	0.107248	0.133594	0.802794	0.422094	0.598614	AL135905.2	ENSG00000285976.1
0.14949	1.63523	4.37142	0.374072	0.70835	0.846281	AL136295.1	ENSG00000254692.1
0						AL136295.3	ENSG00000259371.2
2.95134	-1.43825	1.48215	-0.970383	0.331855	0.50127	AL136295.4	ENSG00000259522.3
35.8986	1.92474	0.381752	5.04188	4.60991e-07	3.04005e-06	AL136295.5	ENSG00000259529.1
4.24401	0.28308	1.27324	0.222331	0.824056	0.929544	AL136373.1	ENSG00000282881.2
2.75351	-0.775724	1.44651	-0.536273	0.59177	0.754806	AL136454.1	ENSG00000231767.4
0.96281	2.66716	2.85593	0.933904	0.350353	0.522327	AL136531.2	ENSG00000274322.1
0.454535	2.95412	4.29739	0.687422	0.491817	0.665783	AL138752.2	ENSG00000255872.3
0.575267	2.77929	4.30383	0.645772	0.518427	0.689312	AL139011.2	ENSG00000258465.7
0.224234	2.21859	4.3305	0.512318	0.608429	0.767772	AL139142.2	ENSG00000285777.1
0.166925	0	4.40736	0	1	1	AL139300.1	ENSG00000256500.5
2.67139	4.41574	1.87092	2.36019	0.0182654	0.0454129	AL139353.1	ENSG00000203546.7
0.163646	0	4.40736	0	1	1	AL157392.5	ENSG00000282246.1
10.7499	0.948995	0.70749	1.34135	0.179805	0.308825	AL157935.2	ENSG00000257524.6
0						AL159163.1	ENSG00000249141.1
0						AL160269.1	ENSG00000285269.2
0						AL160272.2	ENSG00000285082.1
15.8872	0.26536	0.651152	0.407523	0.683624	0.82832	AL162231.1	ENSG00000187186.14
0.160366	0	4.40736	0	1	1	AL162231.3	ENSG00000258728.1
112.75	-0.948515	0.201711	-4.70236	2.57173e-06	1.51091e-05	AL162377.3	ENSG00000285444.1
0						AL162417.1	ENSG00000285245.1
0						AL162596.1	ENSG00000285946.1
0						AL163195.3	ENSG00000259060.7
0						AL163636.2	ENSG00000259171.1
0						AL353572.3	ENSG00000283205.1
5.06144	0.579985	1.02035	0.56842	0.56975	0.734936	AL353588.1	ENSG00000272442.2
0						AL354761.1	ENSG00000236543.2
0						AL355102.2	ENSG00000258691.1
0.325085	-1.95022	4.37641	-0.445622	0.65587	0.806226	AL355312.5	ENSG00000285991.1
0						AL355315.1	ENSG00000249967.1
0						AL355916.2	ENSG00000258989.1
0						AL355987.1	ENSG00000204003.8
0.0781918	0	4.40736	0	1	1	AL355987.3	ENSG00000272896.1
1.13895	1.75766	3.02643	0.580768	0.561397	0.72906	AL357673.1	ENSG00000256407.2
0						AL358075.4	ENSG00000278139.1
0.662037	2.46464	3.7949	0.64946	0.516041	0.687844	AL358113.1	ENSG00000285130.1
10.9064	1.82513	0.715986	2.54911	0.0107998	0.0289087	AL358472.6	ENSG00000285641.1
0						AL358472.7	ENSG00000285779.1
0						AL359736.1	ENSG00000273167.1
0						AL359922.1	ENSG00000264545.1
0.245466	0.673477	4.37142	0.154064	0.877559	0.957125	AL360181.3	ENSG00000254536.1
48.2825	-0.0844244	0.294631	-0.286542	0.774463	0.897143	AL365205.1	ENSG00000124593.16
0						AL365214.3	ENSG00000281613.2
0						AL365232.1	ENSG00000243501.5
0						AL365273.2	ENSG00000270099.1
58.4584	0.406276	0.265638	1.52943	0.126157	0.232414	AL391650.1	ENSG00000236782.7
0						AL445238.1	ENSG00000285566.1
0						AL445685.3	ENSG00000285839.1
0						AL445989.1	ENSG00000237378.3
0						AL449266.1	ENSG00000274068.1
0						AL451007.3	ENSG00000284188.2
1.22595	0.771547	2.88437	0.267493	0.78909	0.906799	AL451062.3	ENSG00000284989.1
0						AL512428.1	ENSG00000282804.1
0						AL512506.3	ENSG00000281883.1
0.35232	-2.16671	4.35862	-0.497109	0.619112	0.776331	AL512785.2	ENSG00000254706.2
0.979788	-0.190226	2.94212	-0.0646562	0.948448	1	AL513165.2	ENSG00000256966.6
0						AL583836.1	ENSG00000276490.1
0.656194	2.353	3.50447	0.671428	0.501948	0.674729	AL589666.1	ENSG00000271793.1
1.72156	-1.1664	2.05985	-0.566255	0.57122	0.736483	AL590132.1	ENSG00000284299.1
0						AL590764.2	ENSG00000285171.1
0.242433	0	4.40736	0	1	1	AL591806.3	ENSG00000270149.5
0						AL592490.1	ENSG00000197991.11
0.160366	0	4.40736	0	1	1	AL603832.3	ENSG00000271810.5
0						AL645922.1	ENSG00000244255.5
0						AL645941.2	ENSG00000248993.1
0						AL662820.1	ENSG00000285064.1
0						AL662884.4	ENSG00000285085.1
0						AL662899.1	ENSG00000204422.7
0.344783	-3.02709	4.30888	-0.702525	0.482352	0.65669	AL662899.2	ENSG00000263020.6
0						AL669918.1	ENSG00000250264.1
0						AL672043.1	ENSG00000250719.1
0						AL672142.1	ENSG00000251184.1
0						AL691442.1	ENSG00000251246.1
0						AL713999.1	ENSG00000273088.1
0						AL772284.2	ENSG00000277535.2
0						AL807752.6	ENSG00000279073.3
0						AL807752.7	ENSG00000284341.1
0						AL845331.2	ENSG00000259916.1
0.476199	0	4.40736	0	1	1	AL928654.3	ENSG00000257341.5
0						AL929554.1	ENSG00000261793.1
350.147	0.541124	0.115787	4.67343	2.96218e-06	1.72538e-05	ALAD	ENSG00000148218.15
477.188	0.277278	0.105631	2.62496	0.00866585	0.0238864	ALAS1	ENSG00000023330.14
0						ALAS2	ENSG00000158578.20
1.74962	-1.59606	2.26639	-0.70423	0.48129	0.655829	ALB	ENSG00000163631.16
910.516	0.0392623	0.0782123	0.501997	0.61567	0.773558	ALCAM	ENSG00000170017.12
165.904	-1.39541	0.16532	-8.44069	3.15482e-17	6.69322e-16	ALDH16A1	ENSG00000161618.9
1377.96	-0.753423	0.0659479	-11.4245	3.15406e-30	1.88493e-28	ALDH18A1	ENSG00000059573.8
0						ALDH1A1	ENSG00000165092.12
1.24637	2.86973	2.44764	1.17245	0.241017	0.390719	ALDH1A2	ENSG00000128918.14
37.1744	0.7501	0.383382	1.95653	0.0504024	0.108714	ALDH1A3	ENSG00000184254.16
442.953	-0.392898	0.117789	-3.33562	0.000851099	0.00306527	ALDH1B1	ENSG00000137124.7
7.35915	1.76991	0.872421	2.02873	0.042486	0.0941152	ALDH1L1	ENSG00000144908.13
455.209	-0.678528	0.111263	-6.09844	1.07106e-09	1.02549e-08	ALDH1L2	ENSG00000136010.13
488.207	-0.18701	0.120794	-1.54817	0.121581	0.225589	ALDH2	ENSG00000111275.12
7.95535	1.26191	0.969944	1.30101	0.193255	0.326799	ALDH3A1	ENSG00000108602.17
669.614	0.0936055	0.0927943	1.00874	0.313098	0.479778	ALDH3A2	ENSG00000072210.18
10.0334	0.887283	0.672245	1.31988	0.186875	0.318053	ALDH3B1	ENSG00000006534.15
0.0834625	0	4.40736	0	1	1	ALDH3B2	ENSG00000132746.14
88.2059	-0.994298	0.238512	-4.16876	3.0626e-05	0.00014902	ALDH4A1	ENSG00000159423.16
433.05	-0.496141	0.104746	-4.73661	2.17317e-06	1.29352e-05	ALDH5A1	ENSG00000112294.12
67.3711	0.26613	0.242368	1.09804	0.272185	0.430468	ALDH6A1	ENSG00000119711.12
972.291	-0.628606	0.0685165	-9.17452	4.53611e-20	1.21522e-18	ALDH7A1	ENSG00000164904.17
6.98498	1.63451	0.875857	1.86618	0.0620164	0.129419	ALDH8A1	ENSG00000118514.13
415.971	0.424595	0.13794	3.07811	0.00208316	0.00680007	ALDH9A1	ENSG00000143149.12
801.463	-0.192281	0.0911122	-2.11037	0.0348264	0.0793786	ALDOA	ENSG00000149925.18
5.10084	3.40008	1.36215	2.49612	0.0125559	0.0327311	ALDOB	ENSG00000136872.18
211.989	-0.80641	0.161419	-4.99576	5.86049e-07	3.80325e-06	ALDOC	ENSG00000109107.13
335.585	0.0907438	0.115054	0.788703	0.430286	0.607328	ALG1	ENSG00000033011.12
62.54	1.07557	0.296674	3.62543	0.000288479	0.00115356	ALG10	ENSG00000139133.6
369.321	0.658728	0.119346	5.51947	3.40024e-08	2.66194e-07	ALG10B	ENSG00000175548.8
134.002	0.20743	0.212112	0.977929	0.32811	0.49727	ALG11	ENSG00000253710.3
267.111	-0.0559451	0.13399	-0.417532	0.676289	0.822425	ALG12	ENSG00000182858.13
313.627	-0.2692	0.154162	-1.74622	0.0807725	0.161199	ALG13	ENSG00000101901.11
89.0911	0.171288	0.242342	0.706803	0.479689	0.654249	ALG14	ENSG00000172339.9
0						ALG1L	ENSG00000189366.9
0.0952398	0	4.40736	0	1	1	ALG1L2	ENSG00000251287.8
289.067	0.214852	0.138723	1.54878	0.121434	0.225366	ALG2	ENSG00000119523.9
450.95	-0.716486	0.114977	-6.23154	4.61865e-10	4.62007e-09	ALG3	ENSG00000214160.9
288.03	0.340602	0.121418	2.8052	0.00502858	0.0148545	ALG5	ENSG00000120697.8
111.341	0.00793368	0.198615	0.039945	0.968137	1	ALG6	ENSG00000088035.16
370.402	0.141393	0.130949	1.07975	0.280253	0.440629	ALG8	ENSG00000159063.12
198.8	0.0563199	0.149271	0.377301	0.70595	0.846281	ALG9	ENSG00000086848.14
17853.6	0.421181	0.0467009	9.01869	1.90354e-19	4.8754e-18	ALK	ENSG00000171094.17
1.70702	3.89855	2.36212	1.65045	0.0988519	0.190383	ALKAL1	ENSG00000196711.8
0.869355	0.771552	3.14433	0.245378	0.806163	0.916874	ALKAL2	ENSG00000189292.15
147.575	-0.144141	0.184761	-0.78015	0.435303	0.612397	ALKBH1	ENSG00000100601.9
213.425	-0.986436	0.145291	-6.78939	1.12612e-11	1.37314e-10	ALKBH2	ENSG00000189046.10
101.147	0.556619	0.241127	2.3084	0.0209767	0.0511256	ALKBH3	ENSG00000166199.12
162.287	-0.288342	0.171591	-1.68041	0.0928781	0.180523	ALKBH4	ENSG00000160993.3
716.127	-0.0505814	0.0981021	-0.515599	0.606134	0.766564	ALKBH5	ENSG00000091542.8
75.6519	0.254859	0.28762	0.886098	0.375565	0.549638	ALKBH6	ENSG00000239382.10
184.956	-0.512928	0.157314	-3.26053	0.00111203	0.0038808	ALKBH7	ENSG00000125652.7
169.85	-0.473633	0.164797	-2.87403	0.00405267	0.0122693	ALKBH8	ENSG00000137760.14
2.37	-1.4813	1.68307	-0.880118	0.378796	0.553074	ALLC	ENSG00000151360.9
809.587	-0.358539	0.0846481	-4.23564	2.27902e-05	0.000113568	ALMS1	ENSG00000116127.17
0.178102	-1.15198	4.40736	-0.261377	0.793802	0.906799	ALOX12	ENSG00000108839.11
1.0585	2.9573	2.4342	1.2149	0.224405	0.368957	ALOX12B	ENSG00000179477.10
0.0657782	0.771554	4.40736	0.175061	0.861032	0.944395	ALOX15	ENSG00000161905.12
0						ALOX15B	ENSG00000179593.15
0						ALOX5	ENSG00000012779.10
0.175423	0	4.40736	0	1	1	ALOX5AP	ENSG00000132965.9
0.991324	1.83379	2.87608	0.6376	0.523734	0.693837	ALOXE3	ENSG00000179148.9
0						ALPG	ENSG00000163286.8
0						ALPI	ENSG00000163295.4
1.02523	3.26267	2.55133	1.27881	0.200963	0.337524	ALPK1	ENSG00000073331.17
0.945446	1.01656	2.95726	0.343751	0.731034	0.865391	ALPK2	ENSG00000198796.6
6.54383	-0.929696	0.860853	-1.07997	0.280155	0.440595	ALPK3	ENSG00000136383.6
23.9514	-0.582227	0.482556	-1.20655	0.227607	0.373131	ALPL	ENSG00000162551.13
0						ALPP	ENSG00000163283.6
531.519	0.262139	0.113062	2.31855	0.0204196	0.0499844	ALS2	ENSG00000003393.14
18.5468	2.8353	0.622641	4.55367	5.27176e-06	2.93846e-05	ALS2CL	ENSG00000178038.16
0.911323	0	2.96875	0	1	1	ALS2CR12	ENSG00000155749.12
25.4791	-0.092363	0.39366	-0.234627	0.814499	0.922431	ALX1	ENSG00000180318.3
79.3123	-0.0271155	0.243292	-0.111453	0.911258	0.982109	ALX3	ENSG00000156150.7
2.01018	3.38083	2.17838	1.55199	0.120665	0.224091	ALX4	ENSG00000052850.6
1036.46	-0.392805	0.13962	-2.81339	0.00490224	0.0145365	ALYREF	ENSG00000183684.7
46.6361	0.843485	0.343845	2.4531	0.0141631	0.0363891	AMACR	ENSG00000242110.7
0.517559	1.90113	4.35076	0.436965	0.662137	0.809742	AMBN	ENSG00000178522.14
0						AMBP	ENSG00000106927.11
577.54	0.0917017	0.0908867	1.00897	0.31299	0.479658	AMBRA1	ENSG00000110497.14
604.679	-0.447478	0.0873888	-5.12054	3.04665e-07	2.07541e-06	AMD1	ENSG00000123505.15
7.96587	4.91723	1.38197	3.55814	0.00037349	0.00145917	AMDHD1	ENSG00000139344.7
319.303	0.00863	0.139149	0.0620197	0.950547	1	AMDHD2	ENSG00000162066.15
0						AMELX	ENSG00000125363.14
0						AMELY	ENSG00000099721.13
331.774	-0.784805	0.117348	-6.68784	2.26482e-11	2.66983e-10	AMER1	ENSG00000184675.10
355.486	-0.0629576	0.117661	-0.535077	0.592596	0.755211	AMER2	ENSG00000165566.12
178.602	-0.518774	0.187257	-2.77038	0.00559903	0.0162947	AMER3	ENSG00000178171.10
341.154	-0.656187	0.132291	-4.96018	7.04278e-07	4.51308e-06	AMFR	ENSG00000159461.14
1584.34	-0.605411	0.0709113	-8.53758	1.37063e-17	3.01371e-16	AMH	ENSG00000104899.7
0.0861957	-1.15197	4.40736	-0.261375	0.793803	0.906799	AMHR2	ENSG00000135409.10
207.827	-0.265221	0.139974	-1.89479	0.0581205	0.122543	AMIGO1	ENSG00000181754.6
17.1559	1.08345	0.515342	2.10239	0.0355192	0.0807886	AMIGO2	ENSG00000139211.6
0						AMIGO3	ENSG00000176020.8
135.721	-0.131014	0.189219	-0.692398	0.488688	0.663306	AMMECR1	ENSG00000101935.9
582.789	-0.37808	0.106413	-3.55294	0.000380949	0.00148617	AMMECR1L	ENSG00000144233.9
119.856	0.194156	0.19266	1.00777	0.313566	0.480211	AMN	ENSG00000166126.10
116.389	-0.595632	0.213478	-2.79013	0.0052687	0.0154769	AMN1	ENSG00000151743.10
83.2292	-0.520329	0.285541	-1.82226	0.0684156	0.140295	AMOT	ENSG00000126016.15
2223.67	-0.052829	0.0608311	-0.868453	0.385146	0.559891	AMOTL1	ENSG00000166025.17
194.405	-0.0412153	0.151878	-0.27137	0.786106	0.906319	AMOTL2	ENSG00000114019.14
0						AMPD1	ENSG00000116748.21
626.545	-0.766383	0.0829784	-9.23593	2.5605e-20	6.97406e-19	AMPD2	ENSG00000116337.15
108.549	-0.338163	0.210423	-1.60706	0.10804	0.20482	AMPD3	ENSG00000133805.15
94.7428	0.446344	0.277207	1.61015	0.107366	0.203826	AMPH	ENSG00000078053.16
14.8629	0.868619	0.560097	1.55084	0.120941	0.224554	AMT	ENSG00000145020.15
0.357405	0	4.40736	0	1	1	AMTN	ENSG00000187689.9
0						AMY1A	ENSG00000237763.9
0						AMY1B	ENSG00000174876.16
0						AMY1C	ENSG00000187733.6
0						AMY2A	ENSG00000243480.7
52.9054	0.210781	0.384943	0.547564	0.583992	0.747632	AMY2B	ENSG00000240038.6
5.06818	3.24069	1.33387	2.42954	0.0151179	0.0384908	AMZ1	ENSG00000174945.13
708.57	0.042706	0.0933282	0.457589	0.647248	0.798959	AMZ2	ENSG00000196704.11
947.797	-0.124217	0.066088	-1.87957	0.0601665	0.126314	ANAPC1	ENSG00000153107.12
59.5876	0.015575	0.323818	0.0480981	0.961638	1	ANAPC10	ENSG00000164162.13
670.268	-0.0563612	0.0749233	-0.752252	0.451899	0.627783	ANAPC11	ENSG00000141552.17
393.344	-0.617762	0.107852	-5.72788	1.01694e-08	8.61441e-08	ANAPC13	ENSG00000129055.12
52.8377	-1.29427	0.295831	-4.37504	1.2141e-05	6.34668e-05	ANAPC15	ENSG00000110200.8
462.477	-0.139027	0.0982828	-1.41457	0.157196	0.277981	ANAPC16	ENSG00000166295.8
580.685	0.53189	0.102936	5.16722	2.37606e-07	1.64052e-06	ANAPC2	ENSG00000176248.8
296.678	0.643504	0.120687	5.332	9.71371e-08	7.09714e-07	ANAPC4	ENSG00000053900.10
2014.35	0.386223	0.0551186	7.00713	2.43254e-12	3.17495e-11	ANAPC5	ENSG00000089053.12
983.454	0.0295246	0.0771158	0.38286	0.701824	0.843361	ANAPC7	ENSG00000196510.12
0.498013	-0.190227	4.05256	-0.04694	0.962561	1	ANG	ENSG00000214274.9
391.465	0.356013	0.112493	3.16475	0.00155215	0.00523642	ANGEL1	ENSG00000013523.9
422.454	0.179522	0.117916	1.52246	0.127894	0.235029	ANGEL2	ENSG00000174606.13
0						ANGPT1	ENSG00000154188.9
29.6979	-0.124053	0.377179	-0.328897	0.742233	0.872098	ANGPT2	ENSG00000091879.13
1.66068	0.771564	2.46002	0.313642	0.753793	0.88165	ANGPT4	ENSG00000101280.7
0.0810746	-1.15197	4.40736	-0.261375	0.793803	0.906799	ANGPTL1	ENSG00000116194.12
133.696	-1.20599	0.202838	-5.94557	2.75496e-09	2.49015e-08	ANGPTL2	ENSG00000136859.9
1.6356	-2.95362	2.4483	-1.20639	0.227665	0.373152	ANGPTL3	ENSG00000132855.4
23.2454	4.05145	0.715574	5.66182	1.49775e-08	1.23663e-07	ANGPTL4	ENSG00000167772.11
0.328891	2.77931	4.30383	0.645778	0.518423	0.689312	ANGPTL5	ENSG00000187151.7
3.65165	0.781563	1.19936	0.651648	0.514628	0.686618	ANGPTL6	ENSG00000130812.10
0						ANGPTL7	ENSG00000171819.4
0						ANGPTL8	ENSG00000130173.13
0						ANHX	ENSG00000227059.6
219.762	0.447843	0.141399	3.16722	0.00153905	0.00519761	ANK1	ENSG00000029534.20
969.817	-0.0168544	0.067662	-0.249097	0.803286	0.914657	ANK2	ENSG00000145362.17
48.6534	-0.176419	0.361832	-0.48757	0.625854	0.78218	ANK3	ENSG00000151150.21
23.5599	1.33978	0.509463	2.62978	0.00854391	0.0235981	ANKAR	ENSG00000151687.14
154.18	0.382256	0.181175	2.10987	0.0348698	0.0794666	ANKDD1A	ENSG00000166839.16
3.40308	-2.88241	1.53964	-1.87213	0.061188	0.128016	ANKDD1B	ENSG00000189045.13
90.8245	0.813262	0.238892	3.40431	0.000663315	0.00245174	ANKEF1	ENSG00000132623.15
0.292574	2.0495	4.34075	0.472154	0.636817	0.790345	ANKFN1	ENSG00000153930.11
1412.6	0.454421	0.0605117	7.50963	5.92937e-14	9.392e-13	ANKFY1	ENSG00000185722.17
950.847	-0.187459	0.0676767	-2.76992	0.00560703	0.0163122	ANKH	ENSG00000154122.13
87.0818	-0.765823	0.20592	-3.71904	0.000199984	0.000826639	ANKHD1	ENSG00000131503.20
64.1768	0.474166	0.26075	1.81847	0.0689918	0.141263	ANKHD1-EIF4EBP3	ENSG00000254996.5
838.935	0.179238	0.0746514	2.40101	0.0163501	0.0412163	ANKIB1	ENSG00000001629.9
1.05981	-0.857864	2.45934	-0.348819	0.727225	0.862321	ANKK1	ENSG00000170209.4
76.8268	-0.721256	0.251693	-2.86561	0.00416204	0.0125654	ANKLE1	ENSG00000160117.14
1528.54	0.805786	0.0611825	13.1702	1.30271e-39	1.36242e-37	ANKLE2	ENSG00000176915.14
93.0368	-0.2828	0.202139	-1.39904	0.161801	0.284275	ANKMY1	ENSG00000144504.15
64.2191	-0.256042	0.26022	-0.983945	0.325143	0.493598	ANKMY2	ENSG00000106524.8
145.747	0.837613	0.189988	4.40876	1.03965e-05	5.50351e-05	ANKRA2	ENSG00000164331.9
0.176051	0	4.40736	0	1	1	ANKRD1	ENSG00000148677.6
872.286	0.890777	0.0818964	10.8769	1.48564e-27	7.34491e-26	ANKRD10	ENSG00000088448.14
1322.53	-0.0555405	0.0580686	-0.956465	0.338838	0.509157	ANKRD11	ENSG00000167522.15
517.635	0.488392	0.105259	4.63992	3.4855e-06	2.00798e-05	ANKRD12	ENSG00000101745.16
587.586	0.763865	0.102074	7.48347	7.23836e-14	1.141e-12	ANKRD13A	ENSG00000076513.16
1522.74	-0.663741	0.0678345	-9.78471	1.30976e-22	4.29092e-21	ANKRD13B	ENSG00000198720.12
253.085	0.443256	0.130227	3.40371	0.000664769	0.00245656	ANKRD13C	ENSG00000118454.12
400.721	0.658785	0.113368	5.81102	6.2092e-09	5.37702e-08	ANKRD13D	ENSG00000172932.14
69.7103	-1.17247	0.291334	-4.02448	5.71018e-05	0.000263839	ANKRD16	ENSG00000134461.15
1853.5	0.0716699	0.0567378	1.26318	0.206526	0.344961	ANKRD17	ENSG00000132466.18
100.194	1.16572	0.261687	4.45462	8.40425e-06	4.52078e-05	ANKRD18A	ENSG00000180071.19
175.558	0.35932	0.169422	2.12086	0.0339336	0.0776151	ANKRD18B	ENSG00000230453.9
0						ANKRD2	ENSG00000165887.11
0.159003	0	4.40736	0	1	1	ANKRD20A1	ENSG00000260691.5
0.230301	1.63522	4.37142	0.37407	0.708352	0.846281	ANKRD20A2	ENSG00000183148.6
0.0801831	0	4.40736	0	1	1	ANKRD20A3	ENSG00000276203.4
0.161622	0	4.40736	0	1	1	ANKRD20A4	ENSG00000172014.12
0						ANKRD22	ENSG00000152766.5
7.46891	-0.283093	0.936851	-0.302175	0.762519	0.888324	ANKRD23	ENSG00000163126.14
5.93717	1.93762	0.954166	2.03069	0.042286	0.0937358	ANKRD24	ENSG00000089847.12
189.275	0.305415	0.157847	1.93488	0.0530055	0.1134	ANKRD26	ENSG00000107890.16
390.262	-0.390442	0.113514	-3.4396	0.000582565	0.00217844	ANKRD27	ENSG00000105186.15
811.68	0.113615	0.0842132	1.34914	0.177293	0.305507	ANKRD28	ENSG00000206560.11
2.93983	-1.5346	1.54955	-0.990355	0.322001	0.489831	ANKRD29	ENSG00000154065.16
0						ANKRD30A	ENSG00000148513.17
0						ANKRD30B	ENSG00000180777.13
0						ANKRD30BL	ENSG00000163046.15
18.8092	1.29023	0.580472	2.22272	0.0262345	0.0621158	ANKRD31	ENSG00000145700.9
0						ANKRD33	ENSG00000167612.12
6.79209	3.9186	1.30737	2.9973	0.00272379	0.00863391	ANKRD33B	ENSG00000164236.11
40.9551	-0.414775	0.299425	-1.38524	0.165979	0.289931	ANKRD34A	ENSG00000272031.2
2.01396	1.33	1.71501	0.775504	0.438042	0.614713	ANKRD34B	ENSG00000189127.7
1.35347	0.201886	2.27322	0.088811	0.929232	0.993931	ANKRD34C	ENSG00000235711.4
0						ANKRD35	ENSG00000198483.12
110.834	0.569044	0.218125	2.6088	0.00908609	0.0248724	ANKRD36	ENSG00000135976.18
41.3372	0.391429	0.311216	1.25774	0.208486	0.34769	ANKRD36B	ENSG00000196912.12
97.6703	0.373452	0.21825	1.71112	0.0870581	0.171478	ANKRD36C	ENSG00000174501.14
74.3087	0.0928274	0.27926	0.332405	0.739583	0.870208	ANKRD37	ENSG00000186352.8
112.659	-0.145164	0.2254	-0.64403	0.519556	0.690161	ANKRD39	ENSG00000213337.8
772.677	-0.6067	0.0896874	-6.76461	1.33666e-11	1.61657e-10	ANKRD40	ENSG00000154945.6
0						ANKRD40CL	ENSG00000167117.9
46.4099	0.667938	0.345859	1.93124	0.0534533	0.114223	ANKRD42	ENSG00000137494.13
228.416	-0.0684951	0.14161	-0.483689	0.628607	0.784916	ANKRD44	ENSG00000065413.19
5.32535	-1.98291	1.0738	-1.84664	0.0647996	0.134317	ANKRD45	ENSG00000183831.6
416.628	0.376245	0.109147	3.44715	0.000566544	0.00212535	ANKRD46	ENSG00000186106.11
99.3926	-0.859882	0.211729	-4.06124	4.88136e-05	0.000227997	ANKRD49	ENSG00000168876.8
1081.21	-0.29409	0.0825522	-3.56248	0.000367372	0.00143768	ANKRD50	ENSG00000151458.11
1106.74	-0.663219	0.0797079	-8.32062	8.75081e-17	1.78017e-15	ANKRD52	ENSG00000139645.9
3.00198	2.51427	1.76334	1.42586	0.153909	0.272967	ANKRD53	ENSG00000144031.11
391.339	0.25764	0.0987911	2.60793	0.00910922	0.0249274	ANKRD54	ENSG00000100124.14
0.814632	-0.201905	3.54072	-0.0570236	0.954526	1	ANKRD55	ENSG00000164512.17
149.635	0.783458	0.181597	4.31427	1.60132e-05	8.1924e-05	ANKRD6	ENSG00000135299.16
0						ANKRD60	ENSG00000124227.5
3.96238	0.987666	1.2664	0.7799	0.43545	0.612498	ANKRD61	ENSG00000157999.5
12.5982	1.32548	0.671333	1.97439	0.048337	0.105051	ANKRD62	ENSG00000181626.11
0.552714	-1.02995	4.02927	-0.255616	0.798247	0.910409	ANKRD63	ENSG00000230778.1
1.01796	1.50271	3.06175	0.490802	0.623566	0.780175	ANKRD65	ENSG00000235098.8
0						ANKRD66	ENSG00000230062.5
3.2849	-1.40245	1.4925	-0.939669	0.347388	0.518837	ANKRD7	ENSG00000106013.14
253.602	-0.202751	0.126392	-1.60414	0.108683	0.20568	ANKRD9	ENSG00000156381.8
597.678	0.349964	0.0911762	3.83833	0.000123875	0.000535228	ANKS1A	ENSG00000064999.14
26.3335	0.103793	0.462901	0.224222	0.822584	0.928302	ANKS1B	ENSG00000185046.18
300.886	0.300432	0.131425	2.28596	0.0222565	0.0538666	ANKS3	ENSG00000168096.14
0.19048	0	4.40736	0	1	1	ANKS4B	ENSG00000175311.6
398.764	-0.601365	0.111482	-5.3943	6.87922e-08	5.13502e-07	ANKS6	ENSG00000165138.17
0.285719	0	4.40736	0	1	1	ANKUB1	ENSG00000206199.10
454.315	-0.100285	0.123471	-0.812216	0.416668	0.593654	ANKZF1	ENSG00000163516.13
1101.69	0.334626	0.0836658	3.99955	6.34621e-05	0.000291084	ANLN	ENSG00000011426.10
2.13274	-3.95483	2.13998	-1.84807	0.0645926	0.133921	ANO1	ENSG00000131620.17
217.424	0.314515	0.169056	1.86042	0.0628262	0.130891	ANO10	ENSG00000160746.12
0.380618	2.21858	4.3305	0.512314	0.608431	0.767772	ANO2	ENSG00000047617.14
1.6012	3.33485	2.09862	1.58906	0.112046	0.210733	ANO3	ENSG00000134343.12
4.70629	1.45652	1.16987	1.24503	0.213119	0.353537	ANO4	ENSG00000151572.17
191.271	-0.843201	0.160805	-5.24362	1.57456e-07	1.12179e-06	ANO5	ENSG00000171714.11
1635.09	0.0982975	0.0627857	1.5656	0.117441	0.219153	ANO6	ENSG00000177119.15
13.1056	-0.796963	0.605724	-1.31572	0.188268	0.319957	ANO7	ENSG00000146205.13
569.608	-0.362333	0.0967995	-3.74313	0.000181742	0.000758341	ANO8	ENSG00000074855.10
0.0918546	0.771554	4.40736	0.175061	0.861032	0.944395	ANO9	ENSG00000185101.12
23.0246	0.630334	0.429486	1.46765	0.142201	0.256269	ANOS1	ENSG00000011201.11
1820.73	-0.784762	0.0766991	-10.2317	1.42985e-24	5.5019e-23	ANP32A	ENSG00000140350.15
1424.94	-0.825479	0.0707688	-11.6645	1.93642e-31	1.24381e-29	ANP32B	ENSG00000136938.8
0						ANP32D	ENSG00000139223.2
848.354	-1.60023	0.0753545	-21.236	4.44398e-100	7.25035e-97	ANP32E	ENSG00000143401.14
38.9115	1.49629	0.430226	3.47791	0.000505344	0.00191514	ANPEP	ENSG00000166825.13
726.676	0.238422	0.0960235	2.48295	0.0130299	0.0338022	ANTXR1	ENSG00000169604.19
209.212	0.601803	0.17517	3.43553	0.000591395	0.0022075	ANTXR2	ENSG00000163297.16
0						ANTXRL	ENSG00000274209.4
4.82962	3.85258	1.56805	2.45692	0.0140135	0.0360835	ANXA1	ENSG00000135046.13
0						ANXA10	ENSG00000109511.11
458.057	0.0883607	0.106424	0.830271	0.406386	0.582515	ANXA11	ENSG00000122359.17
0						ANXA13	ENSG00000104537.16
231.07	0.482927	0.137305	3.51719	0.000436141	0.00168139	ANXA2	ENSG00000182718.16
4.18963	0.717956	1.59442	0.450292	0.6525	0.803679	ANXA2R	ENSG00000177721.4
0.911796	0	3.3603	0	1	1	ANXA3	ENSG00000138772.12
56.9589	0.630427	0.29201	2.15892	0.0308561	0.0715589	ANXA4	ENSG00000196975.15
944.305	0.276617	0.0713292	3.87804	0.0001053	0.000462194	ANXA5	ENSG00000164111.14
1055.27	-0.473266	0.0754021	-6.27657	3.46128e-10	3.50969e-09	ANXA6	ENSG00000197043.13
251.623	-0.338265	0.13354	-2.53306	0.0113073	0.0300307	ANXA7	ENSG00000138279.15
0						ANXA8	ENSG00000265190.6
0						ANXA8L1	ENSG00000264230.8
3.44886	2.39561	2.67641	0.895083	0.370743	0.544631	ANXA9	ENSG00000143412.9
0.0952398	0	4.40736	0	1	1	AOAH	ENSG00000136250.11
0.181436	-1.15198	4.40736	-0.261377	0.793802	0.906799	AOC1	ENSG00000002726.20
10.516	2.42686	0.804315	3.0173	0.00255034	0.00814421	AOC2	ENSG00000131480.8
11.1161	2.18004	1.41149	1.54449	0.12247	0.226927	AOC3	ENSG00000131471.6
135.173	0.0944783	0.181153	0.52154	0.601991	0.76313	AOX1	ENSG00000138356.13
0						AP000275.2	ENSG00000265590.9
1.65264	2.60703	2.2662	1.15039	0.249982	0.402254	AP000295.1	ENSG00000249624.9
0						AP000311.1	ENSG00000249209.2
0						AP000350.4	ENSG00000251357.4
4.12174	-3.21264	1.47404	-2.17948	0.0292962	0.0684669	AP000646.1	ENSG00000285509.1
0						AP000721.1	ENSG00000256100.1
0.400916	0	4.40736	0	1	1	AP000781.2	ENSG00000254979.5
0						AP000812.4	ENSG00000284844.1
0						AP000812.5	ENSG00000284922.1
3.80472	-0.0142669	1.12854	-0.0126418	0.989914	1	AP000944.2	ENSG00000285816.1
0.250388	0	4.40736	0	1	1	AP001267.5	ENSG00000285827.1
0						AP001273.2	ENSG00000284057.1
0						AP001458.2	ENSG00000255432.1
0						AP001781.2	ENSG00000258529.5
0						AP001931.1	ENSG00000254732.1
0.369182	0	4.40736	0	1	1	AP002373.1	ENSG00000255663.1
8.78898	0.162057	0.734325	0.220689	0.825335	0.930505	AP002495.1	ENSG00000254469.7
0						AP002512.3	ENSG00000284732.1
0						AP002748.4	ENSG00000256349.1
1.05856	-1.15202	3.28476	-0.350717	0.725801	0.86082	AP002884.3	ENSG00000255292.8
54.1714	-1.16539	0.311673	-3.73914	0.000184652	0.00076852	AP002990.1	ENSG00000255508.7
10.5764	2.24608	0.789562	2.84472	0.0044451	0.0133043	AP003071.5	ENSG00000284713.1
10.5603	1.64868	0.754784	2.18431	0.0289398	0.0678219	AP003108.2	ENSG00000256591.5
0						AP003419.1	ENSG00000256514.1
193.795	0.0847605	0.156198	0.542649	0.587372	0.750958	AP1AR	ENSG00000138660.11
1118.1	0.28991	0.0791268	3.66387	0.000248436	0.00100651	AP1B1	ENSG00000100280.16
1103.57	-0.0117555	0.0686475	-0.171244	0.864032	0.947063	AP1G1	ENSG00000166747.12
278.609	0.65564	0.144598	4.53424	5.78124e-06	3.20711e-05	AP1G2	ENSG00000213983.11
901.252	0.0755089	0.0802602	0.940802	0.346806	0.518145	AP1M1	ENSG00000072958.8
3.93305	-0.447273	1.24857	-0.358227	0.720173	0.856387	AP1M2	ENSG00000129354.11
412.396	-0.0784085	0.120178	-0.652438	0.514119	0.686297	AP1S1	ENSG00000106367.14
828.8	0.228806	0.0717257	3.19002	0.00142262	0.00485074	AP1S2	ENSG00000182287.14
22.6344	-0.29505	0.410772	-0.718283	0.472583	0.647915	AP1S3	ENSG00000152056.16
1096.91	0.151329	0.0740318	2.04411	0.0409424	0.0912658	AP2A1	ENSG00000196961.12
168.622	0.441781	0.224051	1.97179	0.0486338	0.105612	AP2A2	ENSG00000183020.13
4108.16	-0.00428648	0.0568197	-0.07544	0.939865	1	AP2B1	ENSG00000006125.17
1662.24	-0.0749643	0.0700633	-1.06995	0.284641	0.446016	AP2M1	ENSG00000161203.13
250.095	-0.528782	0.146926	-3.59898	0.000319472	0.00126786	AP2S1	ENSG00000042753.11
414.597	-0.225829	0.114051	-1.98008	0.0476945	0.10389	AP3B1	ENSG00000132842.13
1293.36	0.525046	0.0775557	6.76993	1.28847e-11	1.56293e-10	AP3B2	ENSG00000103723.13
2173.21	0.110778	0.0604419	1.8328	0.0668326	0.137642	AP3D1	ENSG00000065000.17
1006.85	-0.484012	0.0846309	-5.7191	1.07092e-08	9.04823e-08	AP3M1	ENSG00000185009.12
461.628	-0.140914	0.097145	-1.45055	0.146904	0.263217	AP3M2	ENSG00000070718.11
341.642	-0.132083	0.113418	-1.16457	0.244192	0.394768	AP3S1	ENSG00000177879.15
414.313	0.130988	0.111626	1.17345	0.240615	0.390338	AP3S2	ENSG00000157823.16
204.501	-0.5711	0.159281	-3.5855	0.000336438	0.00133034	AP4B1	ENSG00000134262.12
289.422	0.211049	0.134652	1.56736	0.11703	0.218535	AP4E1	ENSG00000081014.10
384.037	0.406032	0.117909	3.44362	0.000573992	0.00215033	AP4M1	ENSG00000221838.9
82.0912	0.274828	0.250688	1.0963	0.27295	0.4313	AP4S1	ENSG00000100478.14
105.249	1.05319	0.204959	5.13855	2.76867e-07	1.89634e-06	AP5B1	ENSG00000254470.2
466.002	0.209181	0.103074	2.02943	0.0424145	0.0939697	AP5M1	ENSG00000053770.11
54.4666	-0.42498	0.306646	-1.3859	0.165778	0.289827	AP5S1	ENSG00000125843.10
323.027	0.166107	0.135	1.23042	0.218539	0.360986	AP5Z1	ENSG00000242802.7
424.262	0.255611	0.11849	2.15725	0.0309865	0.07179	APAF1	ENSG00000120868.13
76.0799	0.974538	0.287734	3.38694	0.000706774	0.00259532	APBA1	ENSG00000107282.7
194.271	-1.35925	0.360163	-3.77397	0.000160668	0.000679055	APBA2	ENSG00000034053.14
227.09	0.329915	0.164844	2.00139	0.0453509	0.0995559	APBA3	ENSG00000011132.11
971.552	-0.117974	0.083982	-1.40476	0.160094	0.281823	APBB1	ENSG00000166313.18
0						APBB1IP	ENSG00000077420.15
461.524	-0.132237	0.132427	-0.998568	0.318004	0.485426	APBB2	ENSG00000163697.16
412.378	0.600792	0.108535	5.53548	3.10379e-08	2.45222e-07	APBB3	ENSG00000113108.19
1044.83	0.252685	0.0713829	3.53985	0.00040035	0.00155258	APC	ENSG00000134982.16
1999.34	-0.0762127	0.0562609	-1.35463	0.175535	0.302958	APC2	ENSG00000115266.11
19.4724	-0.644519	0.444749	-1.44917	0.147289	0.26372	APCDD1	ENSG00000154856.12
3.46041	4.81278	1.78027	2.70341	0.0068633	0.0195384	APCDD1L	ENSG00000198768.10
0						APCS	ENSG00000132703.3
761.831	0.0834859	0.085162	0.980318	0.326929	0.495946	APEH	ENSG00000164062.12
0						APELA	ENSG00000248329.5
1605.31	-0.734188	0.0702212	-10.4554	1.38465e-25	5.74822e-24	APEX1	ENSG00000100823.11
215.969	-0.00324591	0.176671	-0.0183726	0.985342	1	APEX2	ENSG00000169188.4
992.708	-0.315277	0.0897007	-3.51476	0.000440149	0.00169444	APH1A	ENSG00000117362.12
192.428	0.638477	0.162996	3.91713	8.96103e-05	0.000399342	APH1B	ENSG00000138613.13
1094.27	0.164362	0.0655063	2.5091	0.0121039	0.0317996	API5	ENSG00000166181.12
175.115	-0.128157	0.162347	-0.789404	0.429876	0.606856	APIP	ENSG00000149089.12
23.2779	0.438944	0.409365	1.07225	0.283606	0.44465	APLF	ENSG00000169621.9
18.0944	0.517861	0.528777	0.979355	0.327404	0.496432	APLN	ENSG00000171388.11
6.76594	-0.196325	1.0597	-0.185264	0.853022	0.944395	APLNR	ENSG00000134817.10
2252.89	0.0672201	0.0625554	1.07457	0.282568	0.443407	APLP1	ENSG00000105290.11
3087.44	0.649944	0.0580707	11.1923	4.44753e-29	2.44314e-27	APLP2	ENSG00000084234.17
991.69	0.360848	0.0824601	4.37603	1.20861e-05	6.32003e-05	APMAP	ENSG00000101474.11
0.147903	0.771545	4.40736	0.175058	0.861034	0.944395	APOA1	ENSG00000118137.9
0						APOA2	ENSG00000158874.11
0						APOA4	ENSG00000110244.6
1.05325	-1.70197	3.13389	-0.543087	0.58707	0.750652	APOA5	ENSG00000110243.11
1.88733	2.08405	2.02468	1.02932	0.303328	0.468591	APOB	ENSG00000084674.14
0						APOBEC1	ENSG00000111701.6
0.33385	0	4.40736	0	1	1	APOBEC2	ENSG00000124701.5
0						APOBEC3A	ENSG00000128383.12
0.253477	0.771537	4.40736	0.175057	0.861035	0.944395	APOBEC3B	ENSG00000179750.15
6.25004	1.99202	1.08969	1.82807	0.0675394	0.138762	APOBEC3C	ENSG00000244509.3
0.777085	-0.753371	3.22152	-0.233856	0.815097	0.922789	APOBEC3D	ENSG00000243811.9
7.61264	3.23184	1.19051	2.71466	0.00663431	0.0189593	APOBEC3F	ENSG00000128394.16
7.26338	1.42922	1.00635	1.42021	0.155548	0.275634	APOBEC3G	ENSG00000239713.8
0						APOBEC3H	ENSG00000100298.15
0.0657782	0.771554	4.40736	0.175061	0.861032	0.944395	APOBEC4	ENSG00000173627.7
1.8364	4.55102	3.7512	1.21322	0.225046	0.369937	APOBR	ENSG00000184730.10
3.81633	1.70058	1.85796	0.915296	0.360036	0.532595	APOC1	ENSG00000130208.9
0						APOC2	ENSG00000234906.9
0						APOC3	ENSG00000110245.11
0						APOC4	ENSG00000267467.3
0						APOC4-APOC2	ENSG00000224916.9
0.080811	0	4.40736	0	1	1	APOD	ENSG00000189058.8
10.8763	1.71538	0.83397	2.05689	0.039697	0.0890006	APOE	ENSG00000130203.9
0						APOF	ENSG00000175336.9
0						APOH	ENSG00000091583.10
0						APOL1	ENSG00000100342.20
115.292	0.407736	0.200439	2.03421	0.0419305	0.0930996	APOL2	ENSG00000128335.13
0.0657782	0.771554	4.40736	0.175061	0.861032	0.944395	APOL3	ENSG00000128284.19
1.09437	-4.02727	3.04599	-1.32215	0.186117	0.317095	APOL4	ENSG00000100336.17
0						APOL5	ENSG00000128313.2
0.49329	0.771518	4.40736	0.175052	0.861038	0.944395	APOL6	ENSG00000221963.5
264.563	3.33408	0.275611	12.0971	1.09444e-33	8.11627e-32	APOLD1	ENSG00000178878.12
0.158375	0	4.40736	0	1	1	APOM	ENSG00000204444.10
66.3344	-1.72661	0.261081	-6.61334	3.75757e-11	4.29004e-10	APOO	ENSG00000184831.13
311.959	0.21229	0.139525	1.52152	0.12813	0.23533	APOOL	ENSG00000155008.13
133.301	0.725173	0.221856	3.26866	0.00108059	0.00378078	APOPT1	ENSG00000256053.7
4892.18	-0.247757	0.0479372	-5.16835	2.36164e-07	1.63125e-06	APP	ENSG00000142192.20
912.879	0.131004	0.0898244	1.45844	0.144718	0.259916	APPBP2	ENSG00000062725.9
731.994	-0.253741	0.165748	-1.53088	0.125798	0.231961	APPL1	ENSG00000157500.11
325.399	0.176085	0.124012	1.4199	0.155637	0.275732	APPL2	ENSG00000136044.11
160.566	-0.626781	0.170742	-3.67093	0.00024167	0.000983008	APRT	ENSG00000198931.10
259.808	0.191736	0.139652	1.37296	0.169766	0.295249	APTX	ENSG00000137074.18
6.09806	-0.0736095	1.08381	-0.0679176	0.945851	1	AQP1	ENSG00000240583.11
32.2822	-0.264838	0.359892	-0.735883	0.461802	0.636953	AQP10	ENSG00000143595.12
23.0958	-0.598272	0.499302	-1.19822	0.230833	0.37732	AQP11	ENSG00000178301.3
0						AQP12A	ENSG00000184945.13
0						AQP12B	ENSG00000185176.12
0.418767	-2.02845	4.36968	-0.46421	0.642498	0.794817	AQP2	ENSG00000167580.7
111.748	4.31492	0.353336	12.2119	2.68451e-34	2.14695e-32	AQP3	ENSG00000165272.15
1.66247	4.12211	2.38953	1.72508	0.0845139	0.167335	AQP4	ENSG00000171885.14
55.0729	1.02256	0.404287	2.52929	0.0114293	0.0302955	AQP5	ENSG00000161798.6
20.8627	-0.433501	0.553834	-0.782727	0.433787	0.610633	AQP6	ENSG00000086159.12
0.311112	1.63521	4.37142	0.374069	0.708353	0.846281	AQP7	ENSG00000165269.12
0						AQP8	ENSG00000103375.10
0						AQP9	ENSG00000103569.9
1203.76	0.00958639	0.0700107	0.136927	0.891088	0.966822	AQR	ENSG00000021776.10
0.367419	2.91361	4.29881	0.67777	0.497917	0.671036	AR	ENSG00000169083.16
200.888	-0.828548	0.139017	-5.96005	2.52164e-09	2.29836e-08	ARAF	ENSG00000078061.12
891.216	0.834778	0.0888995	9.39013	5.99291e-21	1.71835e-19	ARAP1	ENSG00000186635.14
1.75492	2.23451	1.92474	1.16094	0.245667	0.396587	ARAP2	ENSG00000047365.11
5.38921	1.49184	1.03806	1.43714	0.150678	0.268462	ARAP3	ENSG00000120318.15
306.643	-0.182353	0.128212	-1.42228	0.154944	0.274623	ARC	ENSG00000198576.3
1361.44	-0.052345	0.0609967	-0.858161	0.390804	0.565797	ARCN1	ENSG00000095139.13
2.3524	5.05963	1.89891	2.66449	0.00771061	0.0216298	AREG	ENSG00000109321.10
865.967	-0.0290009	0.0920911	-0.314915	0.752826	0.880961	AREL1	ENSG00000119682.16
3092.8	-0.188683	0.063257	-2.98279	0.0028563	0.00901191	ARF1	ENSG00000143761.15
1252.19	0.369262	0.0721888	5.11522	3.13377e-07	2.13031e-06	ARF3	ENSG00000134287.9
1434.67	-0.105273	0.0591676	-1.77924	0.0752004	0.151716	ARF4	ENSG00000168374.10
876.103	-0.120509	0.0765661	-1.57392	0.115505	0.216133	ARF5	ENSG00000004059.10
698.303	-0.227472	0.0834613	-2.72548	0.00642086	0.0184138	ARF6	ENSG00000165527.6
1218.42	0.658542	0.0736777	8.93815	3.95749e-19	9.7828e-18	ARFGAP1	ENSG00000101199.12
659.387	-0.266462	0.0898157	-2.96676	0.00300958	0.00943167	ARFGAP2	ENSG00000149182.14
327.376	0.0624949	0.12215	0.511625	0.608913	0.768086	ARFGAP3	ENSG00000242247.10
729.457	0.00757403	0.0923455	0.0820184	0.934632	0.998146	ARFGEF1	ENSG00000066777.8
640.775	0.289683	0.0969118	2.98914	0.0027976	0.00884894	ARFGEF2	ENSG00000124198.8
0.566766	2.5499	4.0405	0.631085	0.527985	0.698118	ARFGEF3	ENSG00000112379.8
342.375	0.556429	0.108992	5.10523	3.30396e-07	2.23854e-06	ARFIP1	ENSG00000164144.15
445.04	0.322489	0.109044	2.95742	0.00310227	0.00968867	ARFIP2	ENSG00000132254.12
566.024	0.630438	0.0861576	7.31726	2.5308e-13	3.76048e-12	ARFRP1	ENSG00000101246.19
0.161622	0	4.40736	0	1	1	ARG1	ENSG00000118520.14
124.725	0.0762052	0.19149	0.39796	0.69066	0.833701	ARG2	ENSG00000081181.7
0						ARGFX	ENSG00000186103.3
1834	-0.81169	0.0717756	-11.3087	1.18812e-29	6.80147e-28	ARGLU1	ENSG00000134884.14
358.502	-0.280807	0.111441	-2.51979	0.0117425	0.0309898	ARHGAP1	ENSG00000175220.11
78.9053	-0.120671	0.238995	-0.504909	0.613623	0.772473	ARHGAP10	ENSG00000071205.11
84.6437	-0.346088	0.210062	-1.64755	0.0994441	0.19125	ARHGAP11A	ENSG00000198826.10
0.131556	1.48125	4.38408	0.33787	0.735462	0.867053	ARHGAP11B	ENSG00000285077.1
403.555	0.0771571	0.101227	0.762221	0.445928	0.622247	ARHGAP12	ENSG00000165322.17
257.518	-0.273312	0.141166	-1.9361	0.0528558	0.113183	ARHGAP15	ENSG00000075884.13
570.016	0.0324239	0.0883852	0.366848	0.713732	0.850898	ARHGAP17	ENSG00000140750.16
14.5471	1.0357	0.569315	1.8192	0.0688807	0.141126	ARHGAP18	ENSG00000146376.10
317.747	-0.303796	0.152495	-1.99217	0.0463529	0.101374	ARHGAP19	ENSG00000213390.10
20.7675	-0.108584	0.524659	-0.206962	0.83604	0.938359	ARHGAP19-SLIT1	ENSG00000269891.2
1.95513	1.76987	2.0194	0.876434	0.380794	0.555296	ARHGAP20	ENSG00000137727.12
694.813	-0.249167	0.0844138	-2.95173	0.00315994	0.00984992	ARHGAP21	ENSG00000107863.17
61.5617	-1.33866	0.278554	-4.80574	1.54178e-06	9.39288e-06	ARHGAP22	ENSG00000128805.14
43.3689	0.443187	0.393967	1.12493	0.260617	0.415736	ARHGAP23	ENSG00000275832.4
125.257	-0.413509	0.20562	-2.01103	0.0443218	0.0976384	ARHGAP24	ENSG00000138639.17
2.71805	0.700561	1.30368	0.537371	0.591012	0.754193	ARHGAP25	ENSG00000163219.11
448.279	1.17109	0.136817	8.55951	1.13349e-17	2.50921e-16	ARHGAP26	ENSG00000145819.16
0.269905	0.939409	4.35076	0.215918	0.829051	0.933472	ARHGAP27	ENSG00000159314.11
307.536	0.401861	0.131086	3.06564	0.00217207	0.00705916	ARHGAP28	ENSG00000088756.12
22.2618	1.50991	0.498947	3.0262	0.0024765	0.00793792	ARHGAP29	ENSG00000137962.12
13.6145	3.57165	0.864083	4.13345	3.57352e-05	0.000171477	ARHGAP30	ENSG00000186517.13
210.005	0.320283	0.169064	1.89444	0.0581665	0.122624	ARHGAP31	ENSG00000031081.10
503.623	-0.287095	0.109593	-2.61965	0.00880195	0.0241757	ARHGAP32	ENSG00000134909.18
680.391	-0.194174	0.0827867	-2.34547	0.019003	0.0469821	ARHGAP33	ENSG00000004777.18
2152.13	-0.0310083	0.0558257	-0.555447	0.578589	0.742501	ARHGAP35	ENSG00000160007.18
85.2656	1.17248	0.23355	5.02026	5.16006e-07	3.37691e-06	ARHGAP36	ENSG00000147256.11
305.366	-0.57806	0.144414	-4.00281	6.2595e-05	0.000287268	ARHGAP39	ENSG00000147799.11
26.7092	0.830374	0.413807	2.00667	0.044785	0.0984993	ARHGAP4	ENSG00000089820.15
0						ARHGAP40	ENSG00000124143.10
155.377	1.65836	0.190358	8.71179	2.99103e-18	6.94149e-17	ARHGAP42	ENSG00000165895.18
6.29344	3.91338	1.3296	2.94329	0.00324746	0.0100842	ARHGAP44	ENSG00000006740.16
57.2539	1.41124	0.300977	4.68886	2.74727e-06	1.6094e-05	ARHGAP45	ENSG00000180448.10
277.327	0.872654	0.13405	6.50994	7.51829e-11	8.25999e-10	ARHGAP5	ENSG00000100852.12
0.894305	0.286213	3.03789	0.0942146	0.924939	0.991546	ARHGAP6	ENSG00000047648.21
1.53372	0	2.46334	0	1	1	ARHGAP8	ENSG00000241484.9
5.35409	3.67305	1.46958	2.4994	0.0124405	0.0324904	ARHGAP9	ENSG00000123329.17
3420.44	-0.582547	0.0537966	-10.8287	2.5169e-27	1.21849e-25	ARHGDIA	ENSG00000141522.11
3.75547	3.94411	1.6462	2.39589	0.0165799	0.0417312	ARHGDIB	ENSG00000111348.8
198.079	0.226129	0.159691	1.41604	0.156763	0.277396	ARHGDIG	ENSG00000242173.8
686.294	0.522058	0.086342	6.0464	1.48116e-09	1.3912e-08	ARHGEF1	ENSG00000076928.17
0.641465	0	4.40736	0	1	1	ARHGEF10	ENSG00000104728.15
194.982	-0.265547	0.15705	-1.69085	0.0908662	0.177394	ARHGEF10L	ENSG00000074964.16
707.158	0.0199004	0.0799034	0.249056	0.803317	0.914657	ARHGEF11	ENSG00000132694.18
2018.98	0.143551	0.058479	2.45475	0.0140984	0.0362493	ARHGEF12	ENSG00000196914.8
0						ARHGEF15	ENSG00000198844.11
1.58051	1.48617	2.09336	0.709944	0.477739	0.652611	ARHGEF16	ENSG00000130762.14
709.149	-0.731822	0.0932076	-7.85153	4.11008e-15	7.23365e-14	ARHGEF17	ENSG00000110237.4
102.217	0.306669	0.226444	1.35428	0.175646	0.303117	ARHGEF18	ENSG00000104880.17
50.2981	0.590646	0.300546	1.96524	0.0493862	0.107004	ARHGEF19	ENSG00000142632.16
549.907	-0.193284	0.0967372	-1.99803	0.0457131	0.100243	ARHGEF2	ENSG00000116584.17
494.1	0.42115	0.0932775	4.51503	6.33089e-06	3.49302e-05	ARHGEF25	ENSG00000240771.6
0.387512	0.771527	4.40736	0.175054	0.861037	0.944395	ARHGEF26	ENSG00000114790.12
10.1289	2.31656	0.831626	2.78557	0.00534329	0.0156556	ARHGEF28	ENSG00000214944.9
85.5991	0.201568	0.271772	0.741679	0.458282	0.633794	ARHGEF3	ENSG00000163947.11
14.706	1.66683	1.20363	1.38484	0.166103	0.290084	ARHGEF33	ENSG00000214694.11
0.15687	0.771545	4.40736	0.175058	0.861034	0.944395	ARHGEF35	ENSG00000213214.4
57.1158	0.251508	0.314454	0.799824	0.423813	0.600165	ARHGEF37	ENSG00000183111.11
0.0918546	0.771554	4.40736	0.175061	0.861032	0.944395	ARHGEF38	ENSG00000236699.8
326.717	1.09351	0.13099	8.34804	6.94073e-17	1.41902e-15	ARHGEF39	ENSG00000137135.17
319.098	-0.0789606	0.127031	-0.621586	0.534214	0.703958	ARHGEF4	ENSG00000136002.18
636.913	0.226826	0.107538	2.10927	0.0349212	0.0795504	ARHGEF40	ENSG00000165801.9
0.161018	0.771545	4.40736	0.175058	0.861034	0.944395	ARHGEF5	ENSG00000050327.14
166.747	2.17502	0.211309	10.2931	7.57367e-25	3.00644e-23	ARHGEF6	ENSG00000129675.15
857.336	-0.0238128	0.0892786	-0.266724	0.789681	0.906799	ARHGEF7	ENSG00000102606.18
592.853	-0.0851083	0.0942638	-0.902874	0.366593	0.540139	ARHGEF9	ENSG00000131089.15
956.739	0.0735289	0.0861024	0.853969	0.393122	0.568346	ARID1A	ENSG00000117713.19
886.785	-0.188514	0.0668446	-2.82018	0.00479961	0.0142555	ARID1B	ENSG00000049618.23
722.599	-0.309405	0.107132	-2.88807	0.0038762	0.0118029	ARID2	ENSG00000189079.15
190.076	-0.210172	0.152238	-1.38055	0.167418	0.291789	ARID3A	ENSG00000116017.10
221.307	-0.0743725	0.178473	-0.416716	0.676886	0.823028	ARID3B	ENSG00000179361.17
0.65225	0	4.19104	0	1	1	ARID3C	ENSG00000205143.2
271.644	0.312643	0.133796	2.33671	0.0194543	0.0479307	ARID4A	ENSG00000032219.18
583.83	0.549359	0.108509	5.06279	4.13172e-07	2.75139e-06	ARID4B	ENSG00000054267.21
60.1633	0.277628	0.270298	1.02712	0.304365	0.469838	ARID5A	ENSG00000196843.15
244.236	0.494125	0.140135	3.52608	0.000421767	0.00163176	ARID5B	ENSG00000150347.15
692.377	-0.308438	0.0914618	-3.37231	0.000745393	0.00272182	ARIH1	ENSG00000166233.14
1029.38	0.103874	0.0815077	1.27441	0.202519	0.339682	ARIH2	ENSG00000177479.19
22.0546	0.14017	0.488948	0.286677	0.77436	0.897143	ARIH2OS	ENSG00000221883.3
314.382	-0.0102944	0.126251	-0.081539	0.935013	0.998282	ARL1	ENSG00000120805.13
1099.16	-0.71813	0.0786545	-9.13019	6.83799e-20	1.80813e-18	ARL10	ENSG00000175414.6
0						ARL11	ENSG00000152213.3
0						ARL13A	ENSG00000174225.14
151.632	0.110858	0.187805	0.590282	0.555001	0.723173	ARL13B	ENSG00000169379.15
0.161622	0	4.40736	0	1	1	ARL14	ENSG00000179674.3
289.38	-0.0695993	0.131419	-0.529597	0.596392	0.758625	ARL14EP	ENSG00000152219.4
0.308211	0.771531	4.40736	0.175055	0.861036	0.944395	ARL14EPL	ENSG00000268223.5
134.184	-0.033551	0.209365	-0.160251	0.872683	0.954214	ARL15	ENSG00000185305.10
359.764	0.686452	0.137861	4.97931	6.38107e-07	4.11491e-06	ARL16	ENSG00000214087.8
1.8788	4.34253	2.00596	2.16481	0.0304023	0.070617	ARL17A	ENSG00000185829.17
0.763174	-2.84973	3.20082	-0.890313	0.373298	0.547054	ARL17B	ENSG00000228696.8
241.256	-1.52345	0.146604	-10.3916	2.70904e-25	1.10495e-23	ARL2	ENSG00000213465.7
0						ARL2-SNX15	ENSG00000273003.1
367.86	0.0621715	0.119957	0.518283	0.604261	0.764982	ARL2BP	ENSG00000102931.7
414.247	-0.488602	0.106053	-4.60716	4.0821e-06	2.32377e-05	ARL3	ENSG00000138175.8
114.998	0.354868	0.252483	1.40551	0.159869	0.281559	ARL4A	ENSG00000122644.12
513.634	-0.672175	0.110671	-6.07364	1.25046e-09	1.18474e-08	ARL4C	ENSG00000188042.7
96.4465	1.14651	0.272647	4.20509	2.60979e-05	0.000128559	ARL4D	ENSG00000175906.4
319.177	-0.264628	0.125613	-2.10669	0.0351446	0.0800146	ARL5A	ENSG00000162980.16
828.032	-0.0845002	0.0906613	-0.932042	0.351315	0.523204	ARL5B	ENSG00000165997.4
19.898	2.65561	0.637442	4.16604	3.09943e-05	0.000150722	ARL5C	ENSG00000141748.12
887.546	0.289605	0.0851641	3.40055	0.000672501	0.00248176	ARL6	ENSG00000113966.9
4318.6	0.486598	0.0515326	9.44253	3.63885e-21	1.06585e-19	ARL6IP1	ENSG00000170540.14
30.8895	-0.343294	0.429045	-0.800134	0.423633	0.600025	ARL6IP4	ENSG00000182196.13
782.846	0.0983264	0.0706553	1.39163	0.164033	0.287485	ARL6IP5	ENSG00000144746.6
523.052	0.0488366	0.0895798	0.545174	0.585634	0.749322	ARL6IP6	ENSG00000177917.10
332.439	-0.510672	0.155237	-3.28962	0.00100324	0.00354438	ARL8A	ENSG00000143862.7
987.298	0.315644	0.0713658	4.4229	9.73848e-06	5.18887e-05	ARL8B	ENSG00000134108.12
0						ARL9	ENSG00000196503.4
484.923	-0.0352301	0.105929	-0.332583	0.739449	0.870112	ARMC1	ENSG00000104442.9
130.328	0.0610789	0.194331	0.314303	0.753291	0.881315	ARMC10	ENSG00000170632.13
9.95545	0.292878	0.630757	0.464327	0.642413	0.794817	ARMC12	ENSG00000157343.8
12.7322	-1.74042	0.611771	-2.8449	0.00444258	0.0132992	ARMC2	ENSG00000118690.12
3.69684	-1.31372	1.11466	-1.17859	0.238562	0.387703	ARMC3	ENSG00000165309.13
0						ARMC4	ENSG00000169126.15
146.463	-0.743028	0.212309	-3.49975	0.000465703	0.00177896	ARMC5	ENSG00000140691.16
574.074	-0.796837	0.176616	-4.5117	6.43094e-06	3.54342e-05	ARMC6	ENSG00000105676.13
158.33	0.956643	0.204629	4.67502	2.93931e-06	1.71513e-05	ARMC7	ENSG00000125449.6
506.489	-0.0226268	0.0905969	-0.249752	0.802779	0.9143	ARMC8	ENSG00000114098.17
427.463	0.300728	0.107605	2.79474	0.00519419	0.01528	ARMC9	ENSG00000135931.17
312.804	0.0284809	0.126703	0.224784	0.822147	0.927937	ARMCX1	ENSG00000126947.12
454.476	-0.650744	0.0896523	-7.25853	3.91313e-13	5.66986e-12	ARMCX2	ENSG00000184867.13
754.415	0.270595	0.0953016	2.83936	0.00452047	0.0135026	ARMCX3	ENSG00000102401.19
408.639	-0.364536	0.113484	-3.21222	0.00131715	0.00452026	ARMCX4	ENSG00000196440.11
104.828	-0.475147	0.202356	-2.34807	0.0188708	0.046726	ARMCX5	ENSG00000125962.14
102.385	-0.245455	0.207681	-1.18188	0.237252	0.386227	ARMCX6	ENSG00000198960.10
32.5674	1.40012	0.371158	3.7723	0.000161747	0.000682947	ARMH1	ENSG00000198520.11
0						ARMH2	ENSG00000260286.3
312.815	0.147073	0.119641	1.22929	0.218963	0.361614	ARMH3	ENSG00000120029.12
18.0439	0.260432	0.494545	0.526609	0.598465	0.760116	ARMH4	ENSG00000139971.15
0						ARMS2	ENSG00000254636.1
116.137	0.376891	0.18805	2.00421	0.0450481	0.0990111	ARMT1	ENSG00000146476.10
431.187	-0.857928	0.108345	-7.91846	2.40472e-15	4.30186e-14	ARNT	ENSG00000143437.20
669.936	-0.288066	0.0972939	-2.96078	0.00306857	0.00959628	ARNT2	ENSG00000172379.20
145.986	0.850146	0.177995	4.77625	1.78595e-06	1.07678e-05	ARNTL	ENSG00000133794.17
58.5898	1.25321	0.332614	3.76776	0.000164722	0.000693711	ARNTL2	ENSG00000029153.14
304.332	-0.560716	0.116142	-4.82786	1.38006e-06	8.47411e-06	ARPC1A	ENSG00000241685.9
147.526	-0.626651	0.205637	-3.04736	0.00230861	0.00745899	ARPC1B	ENSG00000130429.14
1243.38	-0.298007	0.0654951	-4.55007	5.36289e-06	2.98721e-05	ARPC2	ENSG00000163466.15
975.771	-0.208767	0.0834658	-2.50122	0.0123765	0.0323497	ARPC3	ENSG00000111229.15
476.804	0.179525	0.10358	1.73321	0.0830584	0.164733	ARPC4	ENSG00000241553.12
9.04739	1.47946	0.766431	1.93032	0.053567	0.114431	ARPC4-TTLL3	ENSG00000250151.9
831.235	0.083315	0.093626	0.88987	0.373536	0.547353	ARPC5	ENSG00000162704.15
398.152	0.0916732	0.114572	0.800138	0.423631	0.600025	ARPC5L	ENSG00000136950.13
370.195	-0.276228	0.100309	-2.75375	0.00589161	0.0170368	ARPIN	ENSG00000242498.7
2950.41	-0.251404	0.0528446	-4.75742	1.96085e-06	1.17313e-05	ARPP19	ENSG00000128989.10
25.7822	0.244203	0.527287	0.463131	0.643271	0.795555	ARPP21	ENSG00000172995.16
0						ARR3	ENSG00000120500.17
296.644	-0.422516	0.127683	-3.30911	0.000935928	0.00333545	ARRB1	ENSG00000137486.16
527.08	0.0690529	0.109828	0.628738	0.529521	0.699619	ARRB2	ENSG00000141480.17
177.87	0.805959	0.170863	4.71699	2.39358e-06	1.41439e-05	ARRDC1	ENSG00000197070.13
50.8101	0.468266	0.2937	1.59437	0.110854	0.208964	ARRDC2	ENSG00000105643.9
815.524	0.790619	0.0791517	9.98866	1.70878e-23	5.93163e-22	ARRDC3	ENSG00000113369.8
425.544	0.111752	0.113885	0.981275	0.326457	0.495317	ARRDC4	ENSG00000140450.8
0						ARRDC5	ENSG00000205784.2
191.038	1.08711	0.166847	6.5156	7.23985e-11	7.98096e-10	ARSA	ENSG00000100299.17
673.603	1.08289	0.106522	10.1659	2.81492e-24	1.05576e-22	ARSB	ENSG00000113273.16
195.65	2.09865	0.172983	12.1321	7.14037e-34	5.46925e-32	ARSD	ENSG00000006756.15
0.250388	0	4.40736	0	1	1	ARSE	ENSG00000157399.14
6.73772	1.38578	1.12819	1.22832	0.219327	0.362064	ARSF	ENSG00000062096.14
45.8693	0.804572	0.371878	2.16354	0.0304998	0.0708233	ARSG	ENSG00000141337.12
0						ARSH	ENSG00000205667.2
0.460447	3.26148	4.28778	0.760644	0.446869	0.622977	ARSI	ENSG00000183876.8
1.87218	3.10403	2.05613	1.50965	0.131133	0.23982	ARSJ	ENSG00000180801.13
107.872	0.287259	0.24512	1.17191	0.241233	0.390913	ARSK	ENSG00000164291.16
0						ART1	ENSG00000129744.2
0						ART3	ENSG00000156219.16
0.0801831	0	4.40736	0	1	1	ART4	ENSG00000111339.11
3.5199	3.4829	1.60879	2.16492	0.0303939	0.0706075	ART5	ENSG00000167311.13
1.88266	-3.47509	2.19271	-1.58484	0.113003	0.212178	ARTN	ENSG00000117407.16
114.427	-0.295954	0.202625	-1.4606	0.144125	0.259108	ARV1	ENSG00000173409.13
1635.26	-0.969242	0.0590176	-16.4229	1.31089e-60	3.88856e-58	ARVCF	ENSG00000099889.13
0.702455	-2.39997	3.1086	-0.77204	0.440091	0.616633	ARX	ENSG00000004848.7
36.8908	0.191183	0.777163	0.246001	0.805682	0.916544	AS3MT	ENSG00000214435.7
525.298	-0.111876	0.106292	-1.05254	0.292552	0.455698	ASAH1	ENSG00000104763.18
30.1657	0.370263	0.387269	0.956088	0.339028	0.509322	ASAH2	ENSG00000188611.14
115.114	-0.0789428	0.211418	-0.373396	0.708854	0.846504	ASAH2B	ENSG00000204147.10
743.298	-0.455714	0.0837853	-5.43907	5.35594e-08	4.06571e-07	ASAP1	ENSG00000153317.14
716.98	-0.428172	0.0829697	-5.16058	2.46188e-07	1.69618e-06	ASAP2	ENSG00000151693.10
136.054	0.156195	0.205961	0.758369	0.44823	0.624308	ASAP3	ENSG00000088280.18
888.786	0.387314	0.0781916	4.95339	7.29306e-07	4.66613e-06	ASB1	ENSG00000065802.11
0.4788	0.771524	4.40736	0.175054	0.861037	0.944395	ASB10	ENSG00000146926.10
0						ASB11	ENSG00000165192.13
3.04198	2.89626	1.69638	1.70732	0.0877624	0.172532	ASB12	ENSG00000198881.9
322.416	-0.619888	0.143665	-4.31483	1.59729e-05	8.17433e-05	ASB13	ENSG00000196372.12
5.70764	0.829532	1.02701	0.807714	0.419255	0.595676	ASB14	ENSG00000239388.8
0						ASB15	ENSG00000146809.12
72.9616	0.691218	0.307287	2.24942	0.0244857	0.0586098	ASB16	ENSG00000161664.6
0						ASB17	ENSG00000154007.6
2.15162	0.348911	3.47532	0.100397	0.920029	0.987973	ASB18	ENSG00000182177.14
0						ASB2	ENSG00000100628.11
16.6823	0.395571	0.5346	0.739939	0.459337	0.634662	ASB3	ENSG00000115239.21
0.0834625	0	4.40736	0	1	1	ASB4	ENSG00000005981.12
2.79346	4.05577	1.85363	2.18802	0.0286684	0.0672405	ASB5	ENSG00000164122.8
519.797	0.56906	0.122923	4.62939	3.66749e-06	2.10095e-05	ASB6	ENSG00000148331.11
189.869	0.0953332	0.15174	0.628269	0.529828	0.699731	ASB7	ENSG00000183475.12
190.328	-0.108205	0.16177	-0.668878	0.503573	0.676086	ASB8	ENSG00000177981.10
0.162149	-1.95021	4.37641	-0.445618	0.655873	0.806226	ASB9	ENSG00000102048.15
265.598	-0.209672	0.136203	-1.53941	0.123704	0.228747	ASCC1	ENSG00000138303.17
570.914	0.167141	0.0996812	1.67675	0.0935904	0.181669	ASCC2	ENSG00000100325.14
542.267	0.545182	0.0997764	5.46404	4.65425e-08	3.57505e-07	ASCC3	ENSG00000112249.13
2407.07	-0.425213	0.106949	-3.97586	7.01254e-05	0.000319045	ASCL1	ENSG00000139352.3
9.33376	-3.14041	0.894897	-3.50925	0.000449376	0.00172508	ASCL2	ENSG00000183734.4
0						ASCL3	ENSG00000176009.3
0						ASCL4	ENSG00000187855.5
5.83888	3.46758	1.4093	2.46049	0.0138746	0.0357661	ASCL5	ENSG00000232237.3
150.851	-0.182016	0.162201	-1.12217	0.261791	0.417253	ASF1A	ENSG00000111875.7
596.485	0.628189	0.107069	5.86715	4.43354e-09	3.9205e-08	ASF1B	ENSG00000105011.8
8.92411	-1.29808	0.715484	-1.81427	0.0696357	0.142316	ASGR1	ENSG00000141505.11
0						ASGR2	ENSG00000161944.16
1060.54	0.211976	0.0685717	3.0913	0.00199282	0.00652868	ASH1L	ENSG00000116539.12
528.572	0.493159	0.0948269	5.20063	1.98618e-07	1.39495e-06	ASH2L	ENSG00000129691.15
774.679	-0.100877	0.0880269	-1.14597	0.251806	0.404591	ASIC1	ENSG00000110881.11
78.6684	-0.163551	0.268545	-0.609028	0.542506	0.711359	ASIC2	ENSG00000108684.14
134.255	-1.49033	0.185222	-8.04614	8.54434e-16	1.60785e-14	ASIC3	ENSG00000213199.7
1.63685	3.28687	2.45383	1.33948	0.180413	0.309478	ASIC4	ENSG00000072182.12
0						ASIC5	ENSG00000256394.2
0						ASIP	ENSG00000101440.9
121.415	1.1262	0.209856	5.36652	8.02713e-08	5.93397e-07	ASL	ENSG00000126522.16
0						ASMT	ENSG00000196433.12
0						ASMTL	ENSG00000169093.15
511.698	-0.419816	0.0948047	-4.42822	9.50123e-06	5.0724e-05	ASNA1	ENSG00000198356.11
64.7231	-0.273088	0.260097	-1.04995	0.293742	0.456984	ASNS	ENSG00000070669.16
517.428	-0.154561	0.10275	-1.50424	0.132521	0.241924	ASNSD1	ENSG00000138381.9
1.7666	0.0143749	2.18422	0.00658126	0.994749	1	ASPA	ENSG00000108381.10
33.9508	0.366862	0.420503	0.872436	0.38297	0.55785	ASPDH	ENSG00000204653.9
1.13856	-0.55105	2.53379	-0.217481	0.827834	0.932485	ASPG	ENSG00000166183.15
575.258	0.20337	0.085587	2.37618	0.0174928	0.043752	ASPH	ENSG00000198363.17
422.282	0.26584	0.11536	2.30444	0.0211979	0.0516107	ASPHD1	ENSG00000174939.10
191.285	0.00839225	0.170051	0.0493513	0.960639	1	ASPHD2	ENSG00000128203.6
2022.23	0.369653	0.0540298	6.84166	7.82832e-12	9.72727e-11	ASPM	ENSG00000066279.17
0						ASPN	ENSG00000106819.11
9.24401	1.66792	1.50878	1.10548	0.268953	0.426555	ASPRV1	ENSG00000244617.2
352.082	-0.755901	0.1047	-7.21969	5.21074e-13	7.47041e-12	ASPSCR1	ENSG00000169696.15
401.464	0.330699	0.107048	3.08925	0.00200659	0.00656721	ASRGL1	ENSG00000162174.12
7765.5	-0.558691	0.0585482	-9.5424	1.39569e-21	4.21678e-20	ASS1	ENSG00000130707.17
98.0335	0.0110871	0.203955	0.0543607	0.956648	1	ASTE1	ENSG00000034533.11
0.538639	3.26147	4.28778	0.760642	0.446871	0.622977	ASTL	ENSG00000188886.3
373.13	0.0719236	0.138651	0.518739	0.603943	0.764832	ASTN1	ENSG00000152092.15
1756.56	0.00655318	0.0610019	0.107426	0.914451	0.984186	ASTN2	ENSG00000148219.16
2142.79	-0.0765155	0.0569531	-1.34348	0.179116	0.3079	ASXL1	ENSG00000171456.18
454.602	-0.239698	0.114197	-2.09899	0.0358176	0.0813197	ASXL2	ENSG00000143970.16
150.249	-0.250513	0.176409	-1.42007	0.155588	0.275675	ASXL3	ENSG00000141431.11
0						ASZ1	ENSG00000154438.7
1161.11	0.422187	0.0811867	5.2002	1.99071e-07	1.39752e-06	ATAD1	ENSG00000138138.13
1444.78	0.0848586	0.0671114	1.26444	0.206071	0.344295	ATAD2	ENSG00000156802.12
265.233	-0.21719	0.135128	-1.60729	0.107991	0.204773	ATAD2B	ENSG00000119778.14
282.525	-0.0308483	0.13088	-0.235699	0.813667	0.922001	ATAD3A	ENSG00000197785.13
310.551	0.404297	0.125133	3.23093	0.0012339	0.00426596	ATAD3B	ENSG00000160072.19
0.860843	-3.49441	3.69033	-0.946911	0.343684	0.514659	ATAD3C	ENSG00000215915.9
318.812	-0.471812	0.12449	-3.78997	0.000150664	0.000640126	ATAD5	ENSG00000176208.8
0						ATAT1	ENSG00000137343.17
1905.89	0.257016	0.070075	3.66773	0.000244713	0.000993157	ATCAY	ENSG00000167654.17
597.273	-0.153641	0.0956917	-1.60558	0.108365	0.205197	ATE1	ENSG00000107669.17
191.849	0.246679	0.141206	1.74695	0.0806468	0.160988	ATF1	ENSG00000123268.8
838.148	0.24791	0.0840945	2.94799	0.00319844	0.00995411	ATF2	ENSG00000115966.16
420.83	1.46676	0.131826	11.1264	9.32789e-29	5.05596e-27	ATF3	ENSG00000162772.16
2937.16	-0.138768	0.0612291	-2.26638	0.0234283	0.0563682	ATF4	ENSG00000128272.14
175.148	1.33207	0.338016	3.94086	8.119e-05	0.000365714	ATF5	ENSG00000169136.10
629.863	0.468404	0.0977975	4.78953	1.67171e-06	1.01277e-05	ATF6	ENSG00000118217.5
8.57439	4.24791	2.39427	1.77419	0.0760309	0.153122	ATF6B	ENSG00000213676.12
298.546	-0.386866	0.128361	-3.0139	0.00257915	0.00821854	ATF7	ENSG00000170653.18
1573.97	0.0112361	0.0614964	0.182712	0.855024	0.944395	ATF7IP	ENSG00000171681.12
0.738471	-4.12145	3.77732	-1.0911	0.275227	0.434142	ATF7IP2	ENSG00000166669.13
136.371	-0.793774	0.213012	-3.72643	0.000194207	0.000805003	ATG10	ENSG00000152348.15
198.697	0.0516338	0.152682	0.33818	0.735228	0.867053	ATG101	ENSG00000123395.14
575.533	-0.178875	0.085211	-2.0992	0.0357989	0.0812943	ATG12	ENSG00000145782.12
694.735	0.492391	0.0902988	5.45291	4.95513e-08	3.79011e-07	ATG13	ENSG00000175224.16
227.641	-0.0750613	0.159977	-0.4692	0.638927	0.792405	ATG14	ENSG00000126775.8
482.689	0.514039	0.215501	2.38532	0.0170644	0.0428317	ATG16L1	ENSG00000085978.21
395.052	0.0594883	0.131636	0.451916	0.65133	0.802844	ATG16L2	ENSG00000168010.10
418.405	1.22081	0.117968	10.3486	4.24476e-25	1.70156e-23	ATG2A	ENSG00000110046.12
757.046	0.125258	0.0971169	1.28977	0.197131	0.332286	ATG2B	ENSG00000066739.11
362.22	-0.00876848	0.10893	-0.0804963	0.935843	0.998971	ATG3	ENSG00000144848.10
83.6418	0.0728138	0.236406	0.308003	0.75808	0.884888	ATG4A	ENSG00000101844.17
1350.91	0.557589	0.0786049	7.09356	1.30704e-12	1.77555e-11	ATG4B	ENSG00000168397.16
143.111	-0.0628341	0.187962	-0.334292	0.738159	0.869029	ATG4C	ENSG00000125703.14
344.272	0.298427	0.148516	2.00939	0.0444962	0.0979564	ATG4D	ENSG00000130734.9
121.734	0.296359	0.197892	1.49758	0.134242	0.244628	ATG5	ENSG00000057663.15
485.748	-0.598731	0.100265	-5.97145	2.3515e-09	2.14928e-08	ATG7	ENSG00000197548.12
379.104	0.336254	0.13489	2.4928	0.0126742	0.0330055	ATG9A	ENSG00000198925.11
95.2874	0.924553	0.235516	3.92565	8.64946e-05	0.000386809	ATG9B	ENSG00000181652.19
1068.41	-0.646522	0.0723464	-8.93647	4.01783e-19	9.88702e-18	ATIC	ENSG00000138363.14
322.628	-0.0480977	0.123178	-0.390473	0.696187	0.838683	ATL1	ENSG00000198513.11
637.514	0.160319	0.0971523	1.65018	0.0989058	0.190401	ATL2	ENSG00000119787.13
275.916	-0.118403	0.137166	-0.86321	0.388022	0.563141	ATL3	ENSG00000184743.12
908.845	0.011558	0.0791577	0.146012	0.883912	0.961337	ATM	ENSG00000149311.18
480.35	0.140354	0.0991613	1.41541	0.156948	0.277693	ATMIN	ENSG00000166454.9
2061.31	-0.00327014	0.076154	-0.0429412	0.965748	1	ATN1	ENSG00000111676.14
0.0918546	0.771554	4.40736	0.175061	0.861032	0.944395	ATOH1	ENSG00000172238.4
4.53223	-1.12369	1.16895	-0.961276	0.336413	0.506327	ATOH7	ENSG00000179774.8
185.801	-0.109402	0.183478	-0.596267	0.550997	0.719277	ATOH8	ENSG00000168874.12
125.045	0.118044	0.192653	0.612732	0.540054	0.710099	ATOX1	ENSG00000177556.11
26.8494	-0.0620187	0.390223	-0.158931	0.873723	0.954903	ATP10A	ENSG00000206190.11
0.197335	2.04951	4.34075	0.472156	0.636815	0.790345	ATP10B	ENSG00000118322.13
253.828	1.37739	0.155763	8.84287	9.32871e-19	2.25145e-17	ATP10D	ENSG00000145246.13
1081.08	-0.0762753	0.0750534	-1.01628	0.309496	0.475867	ATP11A	ENSG00000068650.18
379.394	0.313766	0.122299	2.56557	0.0103007	0.0277451	ATP11B	ENSG00000058063.15
1019.88	-0.334441	0.0632639	-5.28644	1.24723e-07	8.99583e-07	ATP11C	ENSG00000101974.14
2.30611	2.21904	1.76258	1.25897	0.20804	0.347053	ATP12A	ENSG00000075673.11
1289.75	0.278025	0.074541	3.72982	0.000191617	0.000795073	ATP13A1	ENSG00000105726.16
375.388	0.184077	0.113719	1.6187	0.105512	0.201102	ATP13A2	ENSG00000159363.17
1632.7	-0.198056	0.0569676	-3.47665	0.000507726	0.00192238	ATP13A3	ENSG00000133657.15
4.59988	4.8014	1.51523	3.16877	0.00153088	0.00517643	ATP13A4	ENSG00000127249.14
0						ATP13A5	ENSG00000187527.10
3337.34	0.016924	0.0509683	0.33205	0.739852	0.870335	ATP1A1	ENSG00000163399.15
0						ATP1A2	ENSG00000018625.14
440.573	-0.12105	0.109432	-1.10617	0.268654	0.426205	ATP1A3	ENSG00000105409.18
0						ATP1A4	ENSG00000132681.16
5347.95	0.328301	0.0540067	6.0789	1.2101e-09	1.15118e-08	ATP1B1	ENSG00000143153.12
14.3054	2.26881	0.692865	3.27454	0.00105833	0.00371131	ATP1B2	ENSG00000129244.8
1130.18	0.213622	0.0735473	2.90456	0.00367773	0.0112638	ATP1B3	ENSG00000069849.10
0						ATP1B4	ENSG00000101892.11
0.936934	0.487874	2.76814	0.176246	0.860101	0.944395	ATP23	ENSG00000166896.8
38.2097	1.24187	0.387177	3.20751	0.00133891	0.00458915	ATP2A1	ENSG00000196296.13
4871.66	-0.00404219	0.0458657	-0.0881309	0.929773	0.994313	ATP2A2	ENSG00000174437.16
45.0088	1.66003	0.373776	4.44125	8.94395e-06	4.78585e-05	ATP2A3	ENSG00000074370.17
823.504	0.550576	0.0797227	6.90613	4.98037e-12	6.29881e-11	ATP2B1	ENSG00000070961.15
197.352	0.318627	0.16148	1.97317	0.0484766	0.105298	ATP2B2	ENSG00000157087.18
119.804	-0.0119797	0.193501	-0.0619103	0.950634	1	ATP2B3	ENSG00000067842.17
120.583	0.33694	0.196046	1.71868	0.0856727	0.169158	ATP2B4	ENSG00000058668.14
2224.85	0.14335	0.0529657	2.70647	0.00680024	0.0193792	ATP2C1	ENSG00000017260.19
3.50457	4.15447	1.79389	2.31591	0.0205633	0.0502682	ATP2C2	ENSG00000064270.12
0.495472	0	4.40736	0	1	1	ATP4A	ENSG00000105675.8
0						ATP4B	ENSG00000186009.4
4212.68	-0.335814	0.057016	-5.88981	3.86631e-09	3.45637e-08	ATP5F1A	ENSG00000152234.15
6023.3	0.022191	0.0420898	0.52723	0.598034	0.759902	ATP5F1B	ENSG00000110955.8
1116.37	-0.132027	0.066198	-1.99443	0.0461048	0.100939	ATP5F1C	ENSG00000165629.19
663.769	-0.72523	0.0921086	-7.87364	3.44469e-15	6.09546e-14	ATP5F1D	ENSG00000099624.7
915.454	-0.162182	0.0869261	-1.86575	0.0620765	0.12951	ATP5F1E	ENSG00000124172.9
248.09	0.214531	0.129713	1.65389	0.0981505	0.189255	ATP5IF1	ENSG00000130770.17
512.568	-0.638971	0.106362	-6.00753	1.88366e-09	1.74415e-08	ATP5MC1	ENSG00000159199.13
802.545	-1.09799	0.104259	-10.5314	6.19322e-26	2.64509e-24	ATP5MC2	ENSG00000135390.18
980.954	-0.20284	0.0737493	-2.75039	0.00595235	0.0171926	ATP5MC3	ENSG00000154518.9
249.679	-0.133696	0.158269	-0.844744	0.398254	0.573966	ATP5MD	ENSG00000173915.15
120.66	-0.543369	0.258839	-2.09925	0.0357946	0.0812943	ATP5ME	ENSG00000169020.9
291.035	-0.478341	0.136153	-3.51327	0.000442626	0.00170157	ATP5MF	ENSG00000241468.7
0.56191	0	4.40736	0	1	1	ATP5MF-PTCD1	ENSG00000248919.7
608.632	-0.079535	0.0983343	-0.808822	0.418618	0.595185	ATP5MG	ENSG00000167283.7
0.323244	0	4.40736	0	1	1	ATP5MGL	ENSG00000249222.1
376.318	-0.211108	0.114423	-1.84498	0.0650401	0.13473	ATP5MPL	ENSG00000156411.9
1228.7	-0.232363	0.0707309	-3.28517	0.00101921	0.00359454	ATP5PB	ENSG00000116459.10
579.356	-0.135985	0.232592	-0.584653	0.558781	0.726763	ATP5PD	ENSG00000167863.11
454.761	-0.238203	0.0986979	-2.41346	0.015802	0.0400138	ATP5PF	ENSG00000154723.12
552.306	-0.163403	0.108068	-1.51203	0.130526	0.238931	ATP5PO	ENSG00000241837.6
171.653	-0.67445	0.19526	-3.45412	0.000552098	0.00207689	ATP5S	ENSG00000125375.14
1861.1	0.733578	0.0681668	10.7615	5.23113e-27	2.46665e-25	ATP6AP1	ENSG00000071553.16
140.2	0.0437935	0.197729	0.221482	0.824717	0.930001	ATP6AP1L	ENSG00000205464.12
825.85	0.558134	0.0919074	6.07279	1.25706e-09	1.1903e-08	ATP6AP2	ENSG00000182220.14
1858.98	0.212863	0.0612013	3.47808	0.000505014	0.00191433	ATP6V0A1	ENSG00000033627.16
490.647	0.313278	0.109098	2.87153	0.0040849	0.0123554	ATP6V0A2	ENSG00000185344.13
0.241829	0.771536	4.40736	0.175056	0.861035	0.944395	ATP6V0A4	ENSG00000105929.16
930.935	0.174546	0.0776121	2.24896	0.0245153	0.0586425	ATP6V0B	ENSG00000117410.13
627.958	0.010288	0.109283	0.0941404	0.924998	0.991546	ATP6V0C	ENSG00000185883.11
661.793	0.182021	0.0958413	1.89919	0.0575389	0.121411	ATP6V0D1	ENSG00000159720.11
0						ATP6V0D2	ENSG00000147614.3
340.577	-0.355326	0.119615	-2.97058	0.00297236	0.00932399	ATP6V0E1	ENSG00000113732.8
717.269	0.408644	0.155075	2.63514	0.00841032	0.0232843	ATP6V0E2	ENSG00000171130.18
855.059	0.557861	0.0848354	6.5758	4.83915e-11	5.4524e-10	ATP6V1A	ENSG00000114573.9
4.19846	-0.131613	1.11664	-0.117866	0.906174	0.977987	ATP6V1B1	ENSG00000116039.12
1678.12	0.433476	0.0603608	7.18142	6.89901e-13	9.76213e-12	ATP6V1B2	ENSG00000147416.10
586.62	-0.241571	0.0829623	-2.91181	0.00359336	0.0110323	ATP6V1C1	ENSG00000155097.11
588.352	-0.534829	0.0839608	-6.36998	1.89047e-10	1.99374e-09	ATP6V1C2	ENSG00000143882.11
418.943	0.315757	0.118747	2.65907	0.00783564	0.0219164	ATP6V1D	ENSG00000100554.11
686.089	0.360815	0.0945977	3.8142	0.000136623	0.000585499	ATP6V1E1	ENSG00000131100.12
116.069	0.442531	0.226459	1.95413	0.050686	0.109225	ATP6V1E2	ENSG00000250565.6
384.247	-0.360246	0.112126	-3.21285	0.00131423	0.00451119	ATP6V1F	ENSG00000128524.4
11.2455	-1.10002	0.763932	-1.43995	0.149882	0.267582	ATP6V1FNB	ENSG00000272899.3
584.287	-0.150766	0.102339	-1.4732	0.140697	0.25413	ATP6V1G1	ENSG00000136888.6
0						ATP6V1G2	ENSG00000213760.10
0						ATP6V1G2-DDX39B	ENSG00000254870.5
0						ATP6V1G3	ENSG00000151418.11
390.682	0.487841	0.121794	4.00547	6.18949e-05	0.000284375	ATP6V1H	ENSG00000047249.17
262.052	-0.440317	0.140011	-3.14488	0.00166158	0.0055596	ATP7A	ENSG00000165240.19
219.79	-0.0957956	0.147235	-0.650629	0.515286	0.687231	ATP7B	ENSG00000123191.14
496.252	-0.843136	0.116959	-7.20883	5.64343e-13	8.0624e-12	ATP8A1	ENSG00000124406.16
226.45	0.373361	0.150538	2.48017	0.013132	0.0340238	ATP8A2	ENSG00000132932.16
3.34812	1.24746	1.23378	1.01109	0.311973	0.478638	ATP8B1	ENSG00000081923.13
678.865	-0.0521288	0.077243	-0.674868	0.49976	0.672793	ATP8B2	ENSG00000143515.16
5.60166	2.62963	1.3105	2.00658	0.0447944	0.0985065	ATP8B3	ENSG00000130270.16
5.77654	1.54024	1.03028	1.49497	0.134923	0.245569	ATP8B4	ENSG00000104043.14
1813.18	-0.272388	0.0535431	-5.08727	3.63254e-07	2.44492e-06	ATP9A	ENSG00000054793.13
185.76	0.253421	0.182453	1.38896	0.164844	0.288632	ATP9B	ENSG00000166377.20
883.384	-0.0702633	0.0932075	-0.753838	0.450947	0.626945	ATPAF1	ENSG00000123472.12
135.824	-0.52162	0.19601	-2.66119	0.00778655	0.021809	ATPAF2	ENSG00000171953.15
430.111	-0.271802	0.100657	-2.70029	0.00692792	0.0197052	ATR	ENSG00000175054.14
416.157	-0.398657	0.121445	-3.28262	0.00102846	0.00362171	ATRAID	ENSG00000138085.16
291.659	0.39904	0.126353	3.15814	0.00158778	0.00534335	ATRIP	ENSG00000164053.20
856.525	0.0436648	0.145193	0.300736	0.763616	0.888933	ATRN	ENSG00000088812.17
382.418	0.877468	0.118113	7.42905	1.09382e-13	1.68673e-12	ATRNL1	ENSG00000107518.17
1640.12	0.0383304	0.0761441	0.503393	0.614688	0.773021	ATRX	ENSG00000085224.22
420.374	0.714963	0.114626	6.23734	4.45061e-10	4.45744e-09	ATXN1	ENSG00000124788.18
1827.19	-0.209883	0.0578488	-3.62814	0.000285471	0.00114209	ATXN10	ENSG00000130638.16
683.914	0.422042	0.0790159	5.34122	9.23226e-08	6.76659e-07	ATXN1L	ENSG00000224470.7
773.509	-0.4698	0.0798115	-5.88637	3.94773e-09	3.5253e-08	ATXN2	ENSG00000204842.15
2839.38	-0.207183	0.0650337	-3.18577	0.00144368	0.00491416	ATXN2L	ENSG00000168488.18
231.265	-0.0372669	0.185231	-0.201192	0.840548	0.942188	ATXN3	ENSG00000066427.22
0						ATXN3L	ENSG00000123594.5
10.7271	0.870036	0.981876	0.886096	0.375566	0.549638	ATXN7	ENSG00000163635.18
57.8275	0.147748	0.290031	0.509421	0.610457	0.769439	ATXN7L1	ENSG00000146776.14
218.97	0.289523	0.14152	2.04581	0.0407748	0.0910166	ATXN7L2	ENSG00000162650.16
1012.71	-0.357278	0.0776369	-4.60191	4.18626e-06	2.37892e-05	ATXN7L3	ENSG00000087152.15
2030.64	-0.320841	0.0692142	-4.63548	3.56117e-06	2.04696e-05	ATXN7L3B	ENSG00000253719.3
95.9017	0.823111	0.262139	3.13998	0.00168961	0.00564183	AUH	ENSG00000148090.11
37.4361	0.174168	0.316918	0.549567	0.582616	0.746282	AUNIP	ENSG00000127423.10
1450.74	0.116847	0.069256	1.68717	0.0915697	0.178487	AUP1	ENSG00000115307.16
562.29	0.383209	0.0909113	4.2152	2.4956e-05	0.000123493	AURKA	ENSG00000087586.17
392.004	0.152485	0.113696	1.34117	0.179865	0.308877	AURKAIP1	ENSG00000175756.13
594.423	-0.593189	0.101117	-5.86636	4.45464e-09	3.93331e-08	AURKB	ENSG00000178999.12
2.63245	5.29144	1.76942	2.9905	0.00278522	0.00881878	AURKC	ENSG00000105146.12
1303.15	-0.463503	0.0722286	-6.41716	1.38836e-10	1.48434e-09	AUTS2	ENSG00000158321.16
99.6882	-0.381559	0.208863	-1.82684	0.0677244	0.139124	AVEN	ENSG00000169857.7
13.0572	-0.583094	0.757737	-0.769521	0.441584	0.618354	AVIL	ENSG00000135407.10
746.256	-0.216376	0.0846086	-2.55737	0.0105466	0.0283238	AVL9	ENSG00000105778.18
0						AVP	ENSG00000101200.5
23.9858	-0.42248	0.473125	-0.892958	0.37188	0.545712	AVPI1	ENSG00000119986.6
0						AVPR1A	ENSG00000166148.3
0.242433	0	4.40736	0	1	1	AVPR1B	ENSG00000198049.6
1.76307	2.37749	1.9486	1.2201	0.222427	0.366185	AVPR2	ENSG00000126895.14
0						AWAT1	ENSG00000204195.3
0						AWAT2	ENSG00000147160.9
1.0655	0.771547	2.89748	0.266282	0.790022	0.906799	AXDND1	ENSG00000162779.21
298.318	-0.470791	0.134402	-3.50286	0.000460296	0.00176078	AXIN1	ENSG00000103126.14
170.395	0.0960147	0.181457	0.529131	0.596715	0.758871	AXIN2	ENSG00000168646.12
1.56447	1.68219	2.35023	0.715756	0.474142	0.649343	AXL	ENSG00000167601.11
2.57268	1.10089	1.75049	0.628904	0.529412	0.699608	AZGP1	ENSG00000160862.12
691.902	0.602429	0.0920964	6.54129	6.09902e-11	6.81544e-10	AZI2	ENSG00000163512.13
2261.4	0.0302332	0.0670909	0.450629	0.652257	0.803501	AZIN1	ENSG00000155096.13
25.9794	2.33123	0.509465	4.57584	4.74307e-06	2.66563e-05	AZIN2	ENSG00000142920.16
0						AZU1	ENSG00000172232.9
664.706	0.749327	0.114824	6.52587	6.76093e-11	7.47321e-10	B2M	ENSG00000166710.18
575.533	0.137863	0.0897991	1.53524	0.124725	0.230294	B3GALNT1	ENSG00000169255.14
125.453	-0.572446	0.182862	-3.13048	0.00174519	0.00580367	B3GALNT2	ENSG00000162885.12
24.7029	-0.246316	0.440038	-0.559761	0.575642	0.740263	B3GALT1	ENSG00000172318.5
23.1503	1.32931	0.535545	2.48216	0.0130589	0.0338667	B3GALT2	ENSG00000162630.5
0						B3GALT4	ENSG00000235863.3
58.1405	-1.42416	0.313487	-4.54295	5.54717e-06	3.08355e-05	B3GALT5	ENSG00000183778.17
256.842	0.248522	0.135419	1.83521	0.0664753	0.137076	B3GALT6	ENSG00000176022.5
426.583	0.604064	0.109568	5.51312	3.52525e-08	2.74815e-07	B3GAT1	ENSG00000109956.12
404.631	-0.028178	0.102098	-0.27599	0.782556	0.903439	B3GAT2	ENSG00000112309.10
508.184	0.608537	0.101078	6.02044	1.73946e-09	1.6189e-08	B3GAT3	ENSG00000149541.9
135.696	0.581694	0.216191	2.69065	0.00713122	0.0201814	B3GLCT	ENSG00000187676.7
34.5511	0.523243	0.368927	1.41828	0.156108	0.276447	B3GNT10	ENSG00000214654.8
197.804	0.283297	0.183833	1.54106	0.123303	0.228211	B3GNT2	ENSG00000170340.10
0.161622	0	4.40736	0	1	1	B3GNT3	ENSG00000179913.10
307.462	0.855491	0.162191	5.27459	1.33054e-07	9.5713e-07	B3GNT4	ENSG00000176383.8
201.047	-0.903228	0.166445	-5.4266	5.74387e-08	4.35461e-07	B3GNT5	ENSG00000176597.11
0						B3GNT6	ENSG00000198488.10
89.9028	-0.143665	0.256917	-0.559187	0.576034	0.740641	B3GNT7	ENSG00000156966.6
0.31234	-0.190214	4.40736	-0.0431582	0.965575	1	B3GNT8	ENSG00000177191.2
141.076	-0.301307	0.213296	-1.41263	0.157766	0.278756	B3GNT9	ENSG00000237172.3
31.8767	-2.11599	0.416895	-5.07559	3.86303e-07	2.58619e-06	B3GNTL1	ENSG00000175711.8
1128.57	0.0763532	0.0843134	0.905588	0.365154	0.538457	B4GALNT1	ENSG00000135454.13
0						B4GALNT2	ENSG00000167080.8
134.263	0.636323	0.172682	3.68494	0.000228754	0.000934666	B4GALNT3	ENSG00000139044.11
1645.81	-0.384212	0.0709052	-5.41867	6.00437e-08	4.52896e-07	B4GALNT4	ENSG00000182272.11
123.924	0.539318	0.173512	3.10825	0.00188201	0.00620553	B4GALT1	ENSG00000086062.12
1078.34	-1.1129	0.0775228	-14.3558	9.79591e-47	1.38974e-44	B4GALT2	ENSG00000117411.16
326.056	-0.158293	0.152703	-1.03661	0.299918	0.464114	B4GALT3	ENSG00000158850.14
259.367	0.556158	0.147468	3.77138	0.000162348	0.000684951	B4GALT4	ENSG00000121578.12
1969.54	-0.14434	0.0562811	-2.56462	0.0103287	0.0278075	B4GALT5	ENSG00000158470.5
214.493	0.585933	0.154764	3.78598	0.000153107	0.000649996	B4GALT6	ENSG00000118276.11
157.34	0.358833	0.16412	2.18641	0.0287855	0.067486	B4GALT7	ENSG00000027847.13
420.038	-0.241355	0.106856	-2.25871	0.0239016	0.0573884	B4GAT1	ENSG00000174684.6
47.2804	0.284451	0.30811	0.923211	0.355897	0.528004	B9D1	ENSG00000108641.15
20.2586	-0.645068	0.568095	-1.13549	0.256168	0.410086	B9D2	ENSG00000123810.7
103.129	-0.727606	0.203125	-3.58206	0.00034089	0.00134599	BAALC	ENSG00000164929.16
0						BAAT	ENSG00000136881.11
340.956	-0.195165	0.138285	-1.41133	0.158148	0.279301	BABAM1	ENSG00000105393.15
113.432	-0.923168	0.233955	-3.94592	7.94942e-05	0.00035857	BABAM2	ENSG00000158019.20
1197.88	0.469736	0.080543	5.83212	5.47278e-09	4.76459e-08	BACE1	ENSG00000186318.16
114.172	-1.10804	0.186623	-5.9373	2.89758e-09	2.61182e-08	BACE2	ENSG00000182240.15
293.394	-0.284206	0.132381	-2.14689	0.0318023	0.0734089	BACH1	ENSG00000156273.15
353.178	0.461542	0.115292	4.00325	6.24795e-05	0.000286819	BACH2	ENSG00000112182.14
237.708	0.862021	0.136308	6.32407	2.54766e-10	2.62405e-09	BAD	ENSG00000002330.13
938.665	0.557595	0.0741066	7.52423	5.303e-14	8.46561e-13	BAG1	ENSG00000107262.21
200.664	0.020933	0.171435	0.122105	0.902816	0.975395	BAG2	ENSG00000112208.11
394.95	0.0530495	0.11824	0.448662	0.653676	0.804642	BAG3	ENSG00000151929.9
234.897	-0.105903	0.145909	-0.725811	0.467954	0.643083	BAG4	ENSG00000156735.10
625.088	-0.228185	0.0947818	-2.40748	0.0160632	0.0405619	BAG5	ENSG00000166170.9
41.0102	0.0944506	0.712159	0.132626	0.894489	0.969457	BAG6	ENSG00000204463.12
1.14436	1.32135	2.61237	0.505803	0.612995	0.77204	BAHCC1	ENSG00000266074.8
585.009	-0.209729	0.0975841	-2.14921	0.0316175	0.0730444	BAHD1	ENSG00000140320.11
166.353	-0.0374815	0.179932	-0.208309	0.834988	0.937487	BAIAP2	ENSG00000175866.15
2.67873	0.275722	1.67031	0.165072	0.868887	0.951211	BAIAP2L1	ENSG00000006453.13
4.75869	-2.29092	1.18171	-1.93865	0.0525436	0.112603	BAIAP2L2	ENSG00000128298.16
19.4298	5.05109	1.14386	4.41583	1.00625e-05	5.34058e-05	BAIAP3	ENSG00000007516.13
100.381	0.819386	0.205173	3.99364	6.50659e-05	0.000297854	BAK1	ENSG00000030110.12
992.178	0.107432	0.0838971	1.28052	0.200364	0.336795	BAMBI	ENSG00000095739.10
836.459	-0.689931	0.0952446	-7.24378	4.36354e-13	6.28897e-12	BANF1	ENSG00000175334.7
0						BANF2	ENSG00000125888.14
0.166925	0	4.40736	0	1	1	BANK1	ENSG00000153064.11
130.415	0.0397055	0.199758	0.198768	0.842444	0.943318	BANP	ENSG00000172530.20
1655.35	0.334405	0.0688911	4.8541	1.20932e-06	7.48199e-06	BAP1	ENSG00000163930.9
169.581	0.0776404	0.183006	0.424251	0.671383	0.817922	BARD1	ENSG00000138376.10
0.19048	0	4.40736	0	1	1	BARHL1	ENSG00000125492.9
0.263113	2.46014	4.31775	0.569773	0.568831	0.734395	BARHL2	ENSG00000143032.7
0.835712	0.94554	3.01418	0.313698	0.753751	0.88165	BARX1	ENSG00000131668.13
0						BARX2	ENSG00000043039.6
1728.69	-0.584198	0.066881	-8.73488	2.43906e-18	5.72566e-17	BASP1	ENSG00000176788.8
0						BATF	ENSG00000156127.6
0.250388	0	4.40736	0	1	1	BATF2	ENSG00000168062.9
58.4013	-0.645977	0.276943	-2.33253	0.0196729	0.0483962	BATF3	ENSG00000123685.8
517.039	0.316108	0.0963393	3.2812	0.00103368	0.00363694	BAX	ENSG00000087088.19
830.611	-0.548063	0.0784662	-6.9847	2.85457e-12	3.68161e-11	BAZ1A	ENSG00000198604.10
2374.81	-0.416304	0.0482845	-8.62188	6.58633e-18	1.49452e-16	BAZ1B	ENSG00000009954.10
1372.08	0.0417024	0.0676051	0.616853	0.537332	0.707323	BAZ2A	ENSG00000076108.11
272.387	0.292639	0.126357	2.31597	0.02056	0.0502682	BAZ2B	ENSG00000123636.17
128.492	-0.0266669	0.201255	-0.132503	0.894586	0.969457	BBC3	ENSG00000105327.17
357.95	-0.0759703	0.103592	-0.733359	0.46334	0.638472	BBIP1	ENSG00000214413.7
9.9338	0.612297	0.686188	0.892316	0.372224	0.546118	BBOF1	ENSG00000119636.15
0.0810746	-1.15197	4.40736	-0.261375	0.793803	0.906799	BBOX1	ENSG00000129151.8
59.4489	1.11125	0.304371	3.65096	0.000261266	0.00105457	BBS1	ENSG00000174483.19
218.016	0.0110187	0.147067	0.0749231	0.940276	1	BBS10	ENSG00000179941.7
40.222	0.988938	0.340105	2.90775	0.00364044	0.011158	BBS12	ENSG00000181004.9
305.17	0.612847	0.120082	5.10358	3.3329e-07	2.25721e-06	BBS2	ENSG00000125124.11
200.366	-0.53887	0.177516	-3.03562	0.00240042	0.00772444	BBS4	ENSG00000140463.13
108.884	-0.376947	0.228505	-1.64962	0.0990205	0.190577	BBS5	ENSG00000163093.11
302.565	0.561557	0.14792	3.79636	0.000146834	0.000625645	BBS7	ENSG00000138686.9
149.415	0.0911647	0.17011	0.535918	0.592016	0.754942	BBS9	ENSG00000122507.20
720.706	-0.247433	0.0842705	-2.93617	0.00332288	0.010289	BBX	ENSG00000114439.18
0.159003	0	4.40736	0	1	1	BCAM	ENSG00000187244.11
22.1476	3.7234	0.715022	5.20739	1.91511e-07	1.34735e-06	BCAN	ENSG00000132692.18
258.553	0.213245	0.14369	1.48406	0.137793	0.249872	BCAP29	ENSG00000075790.10
830.15	0.119341	0.0814749	1.46476	0.142988	0.2575	BCAP31	ENSG00000185825.16
519.303	0.141674	0.103575	1.36785	0.17136	0.297325	BCAR1	ENSG00000050820.16
185.511	-0.210608	0.167851	-1.25473	0.209576	0.349044	BCAR3	ENSG00000137936.17
1.74763	4.02261	2.09222	1.92265	0.0545244	0.116116	BCAS1	ENSG00000064787.13
[truncated: 17,908 more rows]

## Sheet: CLB-BA_72hrs_vs_0hrs
baseMean	log2FoldChange	lfcSE	stat	pvalue	padj	HGNC	ENSG
25.1219	0.238664	0.552644	0.431859	0.665844	0.793722	A1BG	ENSG00000121410.11
0.541326	2.97149	4.3026	0.690626	0.4898	0.641598	A1CF	ENSG00000148584.14
0.242433	2.33504	4.33309	0.538886	0.589966	0.72815	A2M	ENSG00000175899.14
0						A2ML1	ENSG00000166535.19
0						A3GALT2	ENSG00000184389.9
0.725529	1.79042	3.38831	0.528411	0.597214	0.734863	A4GALT	ENSG00000128274.16
0.281046	0	4.40736	0	1	1	A4GNT	ENSG00000118017.3
530.987	-0.822393	0.104234	-7.8899	3.02422e-15	3.30699e-14	AAAS	ENSG00000094914.12
408.2	-0.895301	0.0976389	-9.16952	4.75145e-20	7.17113e-19	AACS	ENSG00000081760.16
0						AADAC	ENSG00000114771.13
0						AADACL2	ENSG00000197953.5
0						AADACL3	ENSG00000188984.11
0						AADACL4	ENSG00000204518.2
223.419	-0.591692	0.144475	-4.09547	4.21304e-05	0.000157398	AADAT	ENSG00000109576.13
480.05	0.449068	0.107814	4.16519	3.11089e-05	0.000118584	AAGAB	ENSG00000103591.12
900.841	0.744923	0.082492	9.03024	1.7129e-19	2.49073e-18	AAK1	ENSG00000115977.18
41.9149	0.546001	0.347297	1.57214	0.115917	0.202057	AAMDC	ENSG00000087884.14
617.302	0.137907	0.0881011	1.56533	0.117505	0.204337	AAMP	ENSG00000127837.9
1.69022	1.45086	2.31392	0.627015	0.53065	0.676732	AANAT	ENSG00000129673.9
510.068	0.277314	0.101725	2.72612	0.00640828	0.0159644	AAR2	ENSG00000131043.11
0.183709	0	4.40736	0	1	1	AARD	ENSG00000205002.3
1551.55	-0.869592	0.0612303	-14.202	8.90549e-46	4.81103e-44	AARS	ENSG00000090861.15
592.387	0.670372	0.0929104	7.21525	5.38352e-13	4.87414e-12	AARS2	ENSG00000124608.4
140.698	0.3147	0.189465	1.66099	0.0967153	0.173054	AARSD1	ENSG00000266967.6
111.076	-0.346967	0.22231	-1.56074	0.118586	0.205972	AASDH	ENSG00000157426.13
1174.09	-0.560869	0.0802001	-6.99337	2.68351e-12	2.30308e-11	AASDHPPT	ENSG00000149313.10
2.11186	1.42945	2.15655	0.662838	0.507434	0.657635	AASS	ENSG00000008311.14
0.0801831	0	4.40736	0	1	1	AATF	ENSG00000275700.4
422.377	0.515582	0.114082	4.51941	6.20122e-06	2.59884e-05	AATK	ENSG00000181409.12
454.482	0.74825	0.111214	6.72802	1.71982e-11	1.37073e-10	ABAT	ENSG00000183044.11
124.261	0.315447	0.194712	1.62007	0.105217	0.185841	ABCA1	ENSG00000165029.15
4.10428	5.14309	1.63348	3.14854	0.00164086	0.0046347	ABCA10	ENSG00000154263.17
25.4721	0.822921	0.428081	1.92235	0.0545617	0.104961	ABCA12	ENSG00000144452.14
0.412009	3.09578	4.29804	0.720278	0.471354	0.624048	ABCA13	ENSG00000179869.14
1386.33	0.502618	0.0576305	8.72138	2.7484e-18	3.69359e-17	ABCA2	ENSG00000107331.16
2507.03	-0.375691	0.0544272	-6.90262	5.1051e-12	4.27566e-11	ABCA3	ENSG00000167972.13
0.166925	1.79467	4.37161	0.410528	0.681419	0.80305	ABCA4	ENSG00000198691.12
212.506	0.907533	0.155524	5.83533	5.36852e-09	3.32652e-08	ABCA5	ENSG00000154265.15
0.740556	3.94096	3.7605	1.04799	0.294645	0.433896	ABCA6	ENSG00000154262.12
350.057	2.67265	0.139575	19.1485	9.95718e-82	1.95725e-79	ABCA7	ENSG00000064687.12
1.6248	3.36157	2.42178	1.38806	0.16512	0.271319	ABCA8	ENSG00000141338.13
1.29882	4.24237	2.45448	1.72842	0.0839126	0.153102	ABCA9	ENSG00000154258.16
50.8184	4.30945	0.43619	9.87976	5.09569e-23	9.29935e-22	ABCB1	ENSG00000085563.14
280.873	-0.971239	0.129799	-7.48265	7.2836e-14	7.13706e-13	ABCB10	ENSG00000135776.4
0						ABCB11	ENSG00000073734.9
17.2858	0.255807	0.555698	0.460335	0.645276	0.779193	ABCB4	ENSG00000005471.17
0						ABCB5	ENSG00000004846.16
346.826	0.101764	0.123485	0.824101	0.409882	0.561716	ABCB6	ENSG00000115657.13
269.161	0.137444	0.147745	0.930281	0.352226	0.499658	ABCB7	ENSG00000131269.16
467.31	0.0697414	0.100284	0.695439	0.48678	0.639017	ABCB8	ENSG00000197150.12
263.569	0.485098	0.146478	3.31174	0.000927161	0.00273736	ABCB9	ENSG00000150967.17
135.502	-0.681785	0.375817	-1.81414	0.0696558	0.130116	ABCC1	ENSG00000103222.18
246.263	0.958933	0.14684	6.53045	6.55732e-11	4.95749e-10	ABCC10	ENSG00000124574.14
6.59134	-0.676262	1.05372	-0.641782	0.521015	0.669372	ABCC11	ENSG00000121270.15
0.0747448	0	4.40736	0	1	1	ABCC12	ENSG00000140798.16
19.5872	2.92788	0.566207	5.17103	2.32805e-07	1.18067e-06	ABCC2	ENSG00000023839.11
0.753352	3.3417	3.29644	1.01373	0.310712	0.45314	ABCC3	ENSG00000108846.15
1194.62	-0.483325	0.0779685	-6.19898	5.68298e-10	3.90307e-09	ABCC4	ENSG00000125257.14
1229.2	-0.34694	0.0837249	-4.14381	3.41581e-05	0.000129421	ABCC5	ENSG00000114770.16
7.13195	2.47375	1.10423	2.24026	0.025074	0.0533911	ABCC6	ENSG00000091262.15
174.069	-0.299544	0.188691	-1.58748	0.112404	0.196915	ABCC8	ENSG00000006071.13
0.155556	0.94098	4.40736	0.213502	0.830935	0.905732	ABCC9	ENSG00000069431.11
88.5703	1.4596	0.2463	5.92612	3.10172e-09	1.97829e-08	ABCD1	ENSG00000101986.11
18.9026	0.87344	0.571299	1.52887	0.126298	0.217014	ABCD2	ENSG00000173208.3
499.001	-0.424027	0.117705	-3.60246	0.000315222	0.00101497	ABCD3	ENSG00000117528.12
666.291	0.956896	0.0864767	11.0654	1.84711e-28	4.47781e-27	ABCD4	ENSG00000119688.20
1434.44	-0.846618	0.0569622	-14.8628	5.74646e-50	3.61982e-48	ABCE1	ENSG00000164163.10
2.1616	-3.41967	2.15048	-1.59019	0.111793	0.196034	ABCF1	ENSG00000204574.12
302.977	-0.446452	0.128551	-3.47295	0.000514779	0.00159578	ABCF2	ENSG00000033050.8
396.36	0.670318	0.108914	6.15456	7.52869e-10	5.10517e-09	ABCF3	ENSG00000161204.11
157.23	-0.511428	0.177703	-2.87799	0.00400222	0.0104658	ABCG1	ENSG00000160179.18
34.2587	-1.01629	0.451009	-2.25338	0.0242352	0.051774	ABCG2	ENSG00000118777.11
72.5203	0.59625	0.318647	1.87119	0.0613185	0.116084	ABCG4	ENSG00000172350.9
0.0861957	-0.982539	4.40736	-0.222932	0.823589	0.905732	ABCG5	ENSG00000138075.12
4.77324	3.05789	1.47541	2.07257	0.0382127	0.0769964	ABCG8	ENSG00000143921.7
18.1968	2.85089	0.665494	4.28387	1.83674e-05	7.23126e-05	ABHD1	ENSG00000143994.13
288.49	0.19226	0.116912	1.64448	0.100078	0.178114	ABHD10	ENSG00000144827.8
102.811	0.277121	0.243525	1.13796	0.255139	0.38675	ABHD11	ENSG00000106077.18
433.513	-0.116277	0.1274	-0.912692	0.361405	0.509797	ABHD12	ENSG00000100997.18
0.783925	2.88945	3.0701	0.941157	0.346624	0.493428	ABHD12B	ENSG00000131969.14
253.56	0.256106	0.145482	1.7604	0.0783401	0.144073	ABHD13	ENSG00000139826.5
87.2532	-0.588312	0.212686	-2.76611	0.00567293	0.0142874	ABHD14A	ENSG00000248487.8
2.65594	-0.0988031	1.46502	-0.0674414	0.94623	0.997077	ABHD14A-ACY1	ENSG00000114786.16
103.792	-1.097	0.20689	-5.30232	1.14339e-07	6.03115e-07	ABHD14B	ENSG00000114779.19
109.164	0.981855	0.261427	3.75575	0.000172826	0.000582332	ABHD15	ENSG00000168792.4
0						ABHD16A	ENSG00000204427.11
90.9623	0.89419	0.287296	3.11243	0.00185552	0.00518815	ABHD16B	ENSG00000183260.7
1255.68	0.553489	0.0666029	8.31028	9.54803e-17	1.16338e-15	ABHD17A	ENSG00000129968.15
392.222	0.022349	0.113273	0.197301	0.843592	0.915318	ABHD17B	ENSG00000107362.13
192.463	-1.34896	0.166213	-8.11585	4.82386e-16	5.56586e-15	ABHD17C	ENSG00000136379.11
115.557	0.728705	0.21417	3.40246	0.000667831	0.00202183	ABHD18	ENSG00000164074.15
1246.25	-0.0124674	0.0688918	-0.180971	0.85639	0.924946	ABHD2	ENSG00000140526.17
207.14	0.461835	0.177347	2.60413	0.0092107	0.0220697	ABHD3	ENSG00000158201.9
57.9793	1.45408	0.295203	4.9257	8.40571e-07	3.99822e-06	ABHD4	ENSG00000100439.10
397.504	0.296617	0.124319	2.38593	0.017036	0.0379807	ABHD5	ENSG00000011198.9
219.205	0.156834	0.139844	1.12149	0.262077	0.395357	ABHD6	ENSG00000163686.14
310.239	0.324676	0.138096	2.35109	0.0187185	0.0412859	ABHD8	ENSG00000127220.5
293.378	-0.165542	0.12767	-1.29665	0.194753	0.31121	ABI1	ENSG00000136754.17
2179.54	-0.180678	0.0500602	-3.60921	0.000307135	0.00099167	ABI2	ENSG00000138443.15
0.323244	2.74827	4.31182	0.637381	0.523877	0.670729	ABI3	ENSG00000108798.8
2.86871	2.38002	1.67185	1.42358	0.154567	0.25693	ABI3BP	ENSG00000154175.16
1406.95	-0.550452	0.059933	-9.18445	4.13648e-20	6.26618e-19	ABL1	ENSG00000097007.17
720.558	-0.282714	0.0928876	-3.04361	0.00233756	0.00640424	ABL2	ENSG00000143322.19
1667.75	-0.874994	0.0578228	-15.1324	9.90858e-52	6.65262e-50	ABLIM1	ENSG00000099204.19
29.955	1.65859	0.425072	3.90192	9.54331e-05	0.000335703	ABLIM2	ENSG00000163995.19
18.5917	2.39733	0.699443	3.42749	0.000609191	0.00186088	ABLIM3	ENSG00000173210.19
0.161622	1.75345	4.37516	0.400773	0.688587	0.805794	ABO	ENSG00000175164.14
55.9595	0.820925	0.374369	2.19282	0.0283201	0.059396	ABR	ENSG00000159842.15
0.298979	0	4.40736	0	1	1	ABRA	ENSG00000174429.3
11.473	-1.04816	0.67815	-1.54562	0.122197	0.211058	ABRACL	ENSG00000146386.7
128.452	-0.909377	0.19134	-4.75268	2.00742e-06	9.08238e-06	ABRAXAS1	ENSG00000163322.13
362.441	0.204319	0.111735	1.82861	0.0674575	0.126502	ABRAXAS2	ENSG00000165660.7
202.039	-0.0930732	0.156199	-0.595862	0.551267	0.696831	ABT1	ENSG00000146109.4
98.6674	1.70196	0.257257	6.61579	3.69581e-11	2.85769e-10	ABTB1	ENSG00000114626.17
53.0073	2.92172	0.404495	7.22313	5.08049e-13	4.60746e-12	ABTB2	ENSG00000166016.5
0.263113	0	4.40736	0	1	1	AC000120.2	ENSG00000285772.1
0						AC000120.3	ENSG00000285953.1
73.2706	0.472485	0.235423	2.00696	0.0447543	0.0883978	AC001226.2	ENSG00000283208.1
0						AC002094.3	ENSG00000273171.1
0						AC002310.4	ENSG00000260869.1
0.526269	2.554	4.32108	0.591055	0.554483	0.698833	AC002310.5	ENSG00000261459.1
0						AC002985.1	ENSG00000268193.5
0						AC002996.1	ENSG00000257767.2
0						AC003002.1	ENSG00000268133.1
0						AC003002.2	ENSG00000268533.1
2.29499	4.83073	2.19907	2.19671	0.0280412	0.0588944	AC003002.3	ENSG00000269533.5
0.14397	0	4.40736	0	1	1	AC003005.1	ENSG00000268107.5
1.17505	3.83551	2.77678	1.38128	0.167193	0.274008	AC003006.1	ENSG00000269026.2
0						AC003688.1	ENSG00000262302.1
0.90483	4.23008	3.40465	1.24244	0.214074	0.336152	AC004076.1	ENSG00000268163.1
0						AC004080.3	ENSG00000257184.3
0						AC004233.2	ENSG00000270168.2
0.605194	2.97148	4.3026	0.690625	0.489801	0.641598	AC004593.3	ENSG00000285162.1
0.449067	-0.457906	4.27896	-0.107014	0.914778	0.971967	AC004687.2	ENSG00000285897.1
0.166925	1.79467	4.37161	0.410528	0.681419	0.80305	AC004691.2	ENSG00000250424.4
2.00926	-1.09943	1.83056	-0.600601	0.548106	0.693804	AC004754.1	ENSG00000269881.1
0						AC004805.1	ENSG00000266076.1
0						AC004832.3	ENSG00000249590.7
3.67044	-1.68478	1.38873	-1.21319	0.225059	0.349632	AC004922.1	ENSG00000284292.1
0.654583	2.7922	4.16615	0.670209	0.502724	0.653802	AC004997.1	ENSG00000248751.6
0.878444	3.55463	3.64216	0.975967	0.329081	0.473954	AC005020.2	ENSG00000272647.3
2.58401	2.62974	1.65828	1.58582	0.11278	0.197469	AC005041.1	ENSG00000159239.13
0						AC005154.5	ENSG00000281039.1
0						AC005258.1	ENSG00000273734.1
0.573543	-0.982572	4.06283	-0.241844	0.808901	0.905732	AC005324.3	ENSG00000251537.4
0						AC005324.4	ENSG00000255104.8
1.64935	4.83123	4.26242	1.13345	0.257026	0.389285	AC005520.1	ENSG00000258653.3
0						AC005551.1	ENSG00000284638.1
31.7655	1.28496	0.387098	3.31947	0.000901883	0.00266755	AC005670.2	ENSG00000262633.2
0						AC005697.1	ENSG00000266202.1
0						AC005702.1	ENSG00000267318.1
54.2373	-2.65461	0.328943	-8.07012	7.02288e-16	8.04059e-15	AC005726.1	ENSG00000258472.8
0						AC005779.2	ENSG00000267545.1
0.161622	1.75345	4.37516	0.400773	0.688587	0.805794	AC005832.4	ENSG00000272921.1
0.260227	-0.982557	4.40736	-0.222936	0.823585	0.905732	AC005833.1	ENSG00000255639.3
0						AC005837.2	ENSG00000267168.1
1.28144	3.07684	2.75602	1.11641	0.264248	0.397933	AC005943.1	ENSG00000267059.2
5.46438	0.868582	2.18641	0.397264	0.691173	0.80806	AC006030.1	ENSG00000264324.1
0.756903	3.78594	3.48503	1.08634	0.277328	0.413584	AC006059.2	ENSG00000280571.2
0.647613	3.36938	3.77124	0.893442	0.37162	0.521547	AC006064.6	ENSG00000285238.2
6.34954	-1.76567	1.1367	-1.55333	0.120343	0.208562	AC006254.1	ENSG00000243696.4
0.367419	0	4.40736	0	1	1	AC006486.1	ENSG00000268643.1
0						AC006518.7	ENSG00000284826.1
0						AC006538.2	ENSG00000267001.1
0						AC006978.2	ENSG00000281593.1
1.69404	-1.86474	2.46128	-0.757627	0.448674	0.60131	AC007040.2	ENSG00000258881.6
0.993174	-0.452817	3.3292	-0.136014	0.89181	0.953153	AC007192.1	ENSG00000268173.3
25.8785	1.08541	0.423213	2.5647	0.0103266	0.0244456	AC007240.1	ENSG00000284681.2
0						AC007326.4	ENSG00000283809.1
0.0918546	0	4.40736	0	1	1	AC007375.1	ENSG00000259164.1
0						AC007731.5	ENSG00000277971.1
0						AC007846.2	ENSG00000285471.1
1.66627	4.9616	2.24062	2.21439	0.026802	0.0565538	AC007906.2	ENSG00000277639.2
0						AC007998.2	ENSG00000267140.1
0						AC008012.1	ENSG00000285901.1
0						AC008073.3	ENSG00000276087.2
0						AC008162.2	ENSG00000278646.1
0.247736	2.36373	4.33141	0.545717	0.58526	0.726124	AC008397.1	ENSG00000284797.1
4.73177	5.08255	1.53724	3.30628	0.000945436	0.00278677	AC008397.2	ENSG00000285188.1
0						AC008403.1	ENSG00000268465.1
0						AC008481.3	ENSG00000267477.1
0						AC008537.1	ENSG00000268797.1
0						AC008575.1	ENSG00000258864.1
0.0801831	0	4.40736	0	1	1	AC008581.2	ENSG00000285000.1
0.32754	-0.982563	4.40736	-0.222937	0.823584	0.905732	AC008676.3	ENSG00000285868.1
0						AC008687.1	ENSG00000267335.2
0						AC008687.4	ENSG00000268655.2
0						AC008687.8	ENSG00000283663.1
0						AC008695.1	ENSG00000273217.1
0.878646	1.94827	3.07659	0.633256	0.526566	0.673007	AC008750.8	ENSG00000269403.1
0						AC008758.1	ENSG00000196826.7
1.4865	-0.516088	2.15266	-0.239745	0.810528	0.905732	AC008758.4	ENSG00000268744.1
0						AC008758.5	ENSG00000268870.1
0						AC008758.6	ENSG00000269755.1
0.0952398	0.940989	4.40736	0.213504	0.830934	0.905732	AC008763.2	ENSG00000268400.5
0						AC008763.3	ENSG00000269711.1
0						AC008764.1	ENSG00000141979.4
0.080811	0.940989	4.40736	0.213504	0.830934	0.905732	AC008764.4	ENSG00000268790.5
0						AC008770.1	ENSG00000257355.1
0.826189	0	3.5352	0	1	1	AC008770.2	ENSG00000267179.1
1.70433	0.726065	2.03905	0.35608	0.721781	0.8357	AC008878.1	ENSG00000267952.1
0						AC008878.2	ENSG00000268614.1
0						AC008878.3	ENSG00000268861.6
0						AC008982.1	ENSG00000268083.5
0						AC009086.2	ENSG00000277669.1
0.766178	-0.205039	3.30136	-0.0621075	0.950477	1	AC009119.2	ENSG00000260300.5
0						AC009133.6	ENSG00000280893.1
0						AC009163.2	ENSG00000260092.1
0						AC009163.4	ENSG00000261717.5
2.12791	1.85089	2.2	0.841311	0.400174	0.551515	AC009336.2	ENSG00000278500.1
0						AC009477.2	ENSG00000284479.1
3.57435	1.17707	1.42951	0.823406	0.410277	0.562092	AC009690.1	ENSG00000260729.1
0.646488	3.74541	4.27962	0.875172	0.38148	0.531544	AC009690.3	ENSG00000273025.1
0.948422	2.91142	2.88964	1.00754	0.313677	0.456484	AC009879.2	ENSG00000285655.1
3.15792	5.91768	1.71827	3.44398	0.000573212	0.00176219	AC009879.3	ENSG00000285791.1
1.10434	0.940984	2.81627	0.334125	0.738285	0.850765	AC010132.3	ENSG00000256646.7
0.668003	-1.89712	3.2591	-0.582098	0.560501	0.704133	AC010197.2	ENSG00000285854.1
0						AC010255.3	ENSG00000250803.6
0						AC010319.2	ENSG00000269035.1
0						AC010323.1	ENSG00000167774.2
0						AC010325.1	ENSG00000261341.6
2.95228	3.35641	3.21289	1.04467	0.296175	0.435873	AC010326.2	ENSG00000269476.1
0						AC010327.1	ENSG00000267110.1
0						AC010422.3	ENSG00000269242.1
0						AC010422.5	ENSG00000269590.1
9.36102	0.762551	0.784115	0.972498	0.330803	0.475804	AC010422.6	ENSG00000269693.1
118.064	0.103615	0.228808	0.452845	0.65066	0.781729	AC010422.8	ENSG00000285589.1
0						AC010463.1	ENSG00000269307.1
0						AC010487.3	ENSG00000283088.1
1.88133	0.957602	1.94034	0.493523	0.621643	0.758119	AC010522.1	ENSG00000268750.6
0.161622	1.75345	4.37516	0.400773	0.688587	0.805794	AC010531.1	ENSG00000131152.4
0.417313	3.11334	4.29743	0.724466	0.46878	0.621349	AC010542.3	ENSG00000260851.6
0.55701	3.52328	4.28502	0.822232	0.410945	0.562807	AC010547.4	ENSG00000261611.6
0						AC010615.4	ENSG00000269237.1
1.43295	0.79802	2.45749	0.32473	0.745385	0.856768	AC010616.1	ENSG00000268041.2
0						AC010616.2	ENSG00000285505.1
0						AC010619.1	ENSG00000269469.1
0						AC010646.1	ENSG00000269095.1
0.312426	0.940962	4.40736	0.213498	0.830939	0.905732	AC011005.1	ENSG00000230626.4
0.417313	3.11334	4.29743	0.724466	0.46878	0.621349	AC011195.2	ENSG00000266826.2
0						AC011330.3	ENSG00000284772.1
31.077	-0.377444	0.394782	-0.956082	0.339031	0.485031	AC011448.1	ENSG00000258674.5
0						AC011452.1	ENSG00000269179.1
0						AC011455.2	ENSG00000269547.1
0						AC011462.1	ENSG00000255730.5
0						AC011473.4	ENSG00000269741.5
0						AC011479.1	ENSG00000267748.4
0						AC011498.4	ENSG00000267385.1
0						AC011499.1	ENSG00000267157.1
12.8185	0.254234	0.661788	0.384162	0.700858	0.816692	AC011511.1	ENSG00000167807.15
0.0657782	0	4.40736	0	1	1	AC011511.4	ENSG00000267303.1
0						AC011530.1	ENSG00000268434.5
0						AC011604.2	ENSG00000257046.5
0.156384	0	4.40736	0	1	1	AC012184.2	ENSG00000260537.2
0.530363	-0.23073	4.24577	-0.0543436	0.956661	1	AC012213.5	ENSG00000285982.1
0.272079	0	4.40736	0	1	1	AC012254.2	ENSG00000267228.7
0.0781918	0	4.40736	0	1	1	AC012309.1	ENSG00000267360.6
0						AC012476.1	ENSG00000285396.1
0						AC012531.2	ENSG00000273049.1
7.031	5.2567	1.40286	3.74714	0.000178862	0.000601553	AC012651.1	ENSG00000258461.5
4.13634	2.6573	1.24649	2.13182	0.0330215	0.0678949	AC013394.1	ENSG00000279765.3
0.166925	1.79467	4.37161	0.410528	0.681419	0.80305	AC013470.2	ENSG00000226690.8
1.66025	3.28853	2.15851	1.52352	0.127628	0.218862	AC013489.1	ENSG00000173867.10
0.939143	-2.36769	3.40391	-0.695581	0.486691	0.638961	AC013717.1	ENSG00000285542.1
0						AC015688.4	ENSG00000266728.5
509.84	-0.92574	0.101172	-9.1502	5.68281e-20	8.54516e-19	AC015802.6	ENSG00000284526.1
3.35968	0.00113001	1.79545	0.000629373	0.999498	1	AC015813.2	ENSG00000266086.2
2.8765	-0.76812	1.62243	-0.473437	0.635902	0.770954	AC017083.3	ENSG00000273398.6
0.316089	0	4.40736	0	1	1	AC018362.3	ENSG00000285942.1
0						AC018512.1	ENSG00000262560.1
2.15301	5.01436	1.98756	2.52287	0.0116401	0.0271686	AC018523.2	ENSG00000256206.2
0						AC018554.3	ENSG00000278499.2
0						AC018709.1	ENSG00000272297.2
0						AC018755.2	ENSG00000268500.5
0						AC019117.2	ENSG00000283321.1
0						AC020636.2	ENSG00000260234.5
0						AC020907.6	ENSG00000285526.1
0						AC020909.1	ENSG00000142539.9
7.96089	3.28234	1.07555	3.05179	0.00227485	0.00625028	AC020915.1	ENSG00000267216.1
0.903599	3.65252	3.02874	1.20595	0.227836	0.35313	AC020915.5	ENSG00000283515.1
0.161654	0.94098	4.40736	0.213502	0.830935	0.905732	AC020922.1	ENSG00000267706.3
0						AC021072.1	ENSG00000283536.2
0.268671	1.96439	4.35796	0.450759	0.652163	0.781729	AC021097.2	ENSG00000285292.1
0						AC021097.3	ENSG00000285480.1
0						AC021660.3	ENSG00000285635.1
0						AC022167.5	ENSG00000283516.1
0						AC022335.1	ENSG00000257062.6
0						AC022384.1	ENSG00000272410.5
34.912	1.12315	0.367305	3.05782	0.00222954	0.00613096	AC022400.6	ENSG00000272916.5
0						AC022414.1	ENSG00000284762.1
0						AC022506.1	ENSG00000285133.1
0						AC022826.2	ENSG00000258677.2
5.76657	-0.592087	0.962767	-0.614985	0.538564	0.684374	AC023055.1	ENSG00000257390.5
9.26186	0.898065	0.715328	1.25546	0.209312	0.330264	AC023509.3	ENSG00000267281.2
0						AC024592.3	ENSG00000267740.5
1.04286	-3.10094	3.11606	-0.995149	0.319664	0.463501	AC025165.3	ENSG00000257921.5
0						AC025263.2	ENSG00000258052.1
130.673	0.421856	0.194961	2.1638	0.0304796	0.0633552	AC025283.2	ENSG00000262621.5
13.9155	0.492556	0.621995	0.791897	0.428421	0.581504	AC025283.3	ENSG00000285329.1
0						AC025287.4	ENSG00000284484.1
0						AC026316.5	ENSG00000285218.1
0						AC026398.1	ENSG00000281938.1
0						AC026464.1	ENSG00000259900.5
0						AC026464.3	ENSG00000260371.1
0.879777	0	3.62619	0	1	1	AC026464.4	ENSG00000260914.3
0						AC026464.6	ENSG00000272617.3
0						AC026786.1	ENSG00000256825.4
2.43375	0.806954	1.67506	0.481746	0.629986	0.765884	AC026954.2	ENSG00000261915.6
0.901307	0	3.36176	0	1	1	AC027644.4	ENSG00000284461.2
1.20154	2.86853	2.55092	1.1245	0.260799	0.393902	AC027796.3	ENSG00000262304.2
0						AC034102.2	ENSG00000257411.1
0.323244	2.74827	4.31182	0.637381	0.523877	0.670729	AC036214.3	ENSG00000276418.5
1.15989	2.78926	2.52304	1.10552	0.268936	0.403281	AC037459.1	ENSG00000248235.6
34.3883	0.339717	0.374168	0.907925	0.363918	0.512589	AC040162.1	ENSG00000261884.2
0						AC046185.1	ENSG00000125695.12
0						AC048338.1	ENSG00000256861.1
0						AC055811.2	ENSG00000264187.1
0						AC058822.1	ENSG00000282278.1
0.325872	1.75343	4.37516	0.400769	0.68859	0.805794	AC067752.1	ENSG00000285551.1
0						AC067968.1	ENSG00000267022.1
0						AC068234.1	ENSG00000259753.1
1.40531	3.71641	2.27291	1.63508	0.102031	0.181018	AC068533.4	ENSG00000249319.2
0.191217	-0.020761	4.40736	-0.00471053	0.996242	1	AC068547.1	ENSG00000283228.1
2.19791	1.65381	1.94282	0.851244	0.394634	0.54517	AC068580.4	ENSG00000250644.3
0						AC068631.2	ENSG00000283149.1
0						AC068775.1	ENSG00000255641.1
0.343296	0	4.40736	0	1	1	AC068790.8	ENSG00000274874.1
256.132	-0.793813	0.145566	-5.45328	4.94497e-08	2.7265e-07	AC068831.7	ENSG00000284946.1
5.6279	-0.315268	0.992393	-0.317685	0.750724	0.860721	AC068896.1	ENSG00000258539.1
3.11438	-0.23836	1.263	-0.188725	0.850308	0.920495	AC068946.1	ENSG00000280537.2
26.6198	0.26272	0.414404	0.633971	0.5261	0.672727	AC068946.2	ENSG00000284820.1
1.34945	2.5387	2.83408	0.895775	0.370373	0.519976	AC068987.5	ENSG00000284730.1
0.215019	0.940973	4.40736	0.2135	0.830937	0.905732	AC069257.3	ENSG00000272741.1
0.0747448	0	4.40736	0	1	1	AC069368.1	ENSG00000249240.2
0						AC069444.2	ENSG00000285585.1
0.547216	0	3.87149	0	1	1	AC069503.2	ENSG00000256950.2
0						AC073082.1	ENSG00000279956.1
0						AC073111.3	ENSG00000284041.1
76.4299	-0.471859	0.276566	-1.70613	0.0879834	0.159459	AC073111.5	ENSG00000284691.1
0.328501	0	4.40736	0	1	1	AC073283.3	ENSG00000273269.3
21.2284	0.454699	0.550915	0.825352	0.409172	0.56107	AC073508.2	ENSG00000264058.2
0						AC073610.2	ENSG00000255863.2
1.63778	2.90678	2.51209	1.15712	0.247225	0.377324	AC073610.3	ENSG00000272822.1
0						AC073612.1	ENSG00000258064.1
2.17127	3.997	2.12452	1.88137	0.0599222	0.11385	AC073896.1	ENSG00000144785.8
41.6634	-0.856165	0.399072	-2.14539	0.0319217	0.0659744	AC074143.1	ENSG00000265690.7
0						AC078927.1	ENSG00000228144.2
2.24694	0.443032	1.77371	0.249777	0.80276	0.901997	AC079447.1	ENSG00000241962.9
0.46737	-2.04209	4.30296	-0.474579	0.635087	0.7705	AC079594.2	ENSG00000248710.1
0						AC083800.1	ENSG00000251012.2
0						AC084121.11	ENSG00000285913.1
0						AC084121.12	ENSG00000285937.1
0						AC084121.13	ENSG00000285950.1
0						AC084121.5	ENSG00000285607.1
0						AC084121.6	ENSG00000285620.1
0						AC084121.7	ENSG00000285657.1
0						AC084121.8	ENSG00000285720.1
0						AC084121.9	ENSG00000285814.1
0						AC084337.2	ENSG00000283977.1
9.41946	1.21366	0.962021	1.26157	0.207102	0.327188	AC087289.3	ENSG00000267426.5
0						AC087498.1	ENSG00000180042.5
4.55868	1.04851	1.31239	0.798931	0.424331	0.577394	AC087632.1	ENSG00000259316.11
0.0834625	0.940989	4.40736	0.213504	0.830934	0.905732	AC087721.2	ENSG00000285920.1
0						AC090004.1	ENSG00000268279.4
0						AC090227.1	ENSG00000266997.2
4.38008	2.8249	1.18048	2.39302	0.0167105	0.0373469	AC090360.1	ENSG00000267127.7
2.19421	0.482962	1.9019	0.253937	0.799544	0.899067	AC090517.4	ENSG00000285253.1
0						AC090527.2	ENSG00000260170.1
1.82983	1.36333	2.15639	0.632227	0.527239	0.673482	AC091057.6	ENSG00000284906.1
2.44267	4.77085	1.75947	2.71153	0.0066974	0.0166007	AC091167.2	ENSG00000261147.1
0						AC091167.6	ENSG00000275674.1
3.06512	4.75486	1.97666	2.4055	0.0161502	0.0362286	AC091167.7	ENSG00000284626.1
2.3782	2.3091	1.83108	1.26106	0.207288	0.327418	AC091551.1	ENSG00000267699.2
2.41973	-3.79287	2.14808	-1.7657	0.0774464	0.142644	AC091959.3	ENSG00000275740.1
0						AC092017.3	ENSG00000283952.1
0						AC092042.3	ENSG00000273291.5
0.298979	0	4.40736	0	1	1	AC092073.1	ENSG00000266953.6
0						AC092111.3	ENSG00000284393.1
0						AC092143.1	ENSG00000198211.8
0.0810746	-0.982539	4.40736	-0.222932	0.823589	0.905732	AC092329.3	ENSG00000283201.1
0						AC092442.1	ENSG00000284684.1
0.0781918	0	4.40736	0	1	1	AC092587.1	ENSG00000273155.1
3.91902	0.07637	1.31306	0.0581618	0.95362	1	AC092647.5	ENSG00000249773.3
8.45456	0.673806	0.798565	0.843771	0.398798	0.549897	AC092718.3	ENSG00000260643.2
3.53306	1.81486	1.19711	1.51603	0.129511	0.22151	AC092718.8	ENSG00000284512.1
23.8728	-0.366938	0.435686	-0.842208	0.399672	0.550963	AC092835.1	ENSG00000233757.6
0.351474	2.48411	4.32472	0.574397	0.565699	0.708974	AC093155.3	ENSG00000267561.2
0						AC093227.2	ENSG00000267552.6
421.166	0.316828	0.10675	2.96796	0.00299786	0.00802595	AC093323.1	ENSG00000170846.17
0						AC093423.3	ENSG00000271949.1
39.4361	0.780909	0.348834	2.23863	0.0251802	0.0535962	AC093512.2	ENSG00000285043.1
0						AC093525.1	ENSG00000259784.1
0.62741	1.41803	3.5816	0.395921	0.692163	0.809045	AC093525.2	ENSG00000260272.1
0.16425	0	4.40736	0	1	1	AC093668.1	ENSG00000270249.1
1.02574	1.94294	2.85794	0.679838	0.496607	0.648119	AC093668.2	ENSG00000272949.1
0.0747448	0	4.40736	0	1	1	AC093668.3	ENSG00000284981.1
0.391159	1.79464	4.37161	0.410523	0.681423	0.80305	AC093827.5	ENSG00000285458.1
0						AC093899.2	ENSG00000251569.1
0.92551	3.78103	3.21841	1.17481	0.24007	0.368427	AC096582.3	ENSG00000283247.2
0.0861957	-0.982539	4.40736	-0.222932	0.823589	0.905732	AC096887.1	ENSG00000272305.5
0						AC097104.1	ENSG00000285528.1
1.20538	-1.09417	2.39956	-0.45599	0.648397	0.780997	AC097625.1	ENSG00000285602.1
1.20483	3.76217	2.61108	1.44085	0.149627	0.250064	AC097634.4	ENSG00000285708.1
0.319474	0.940966	4.40736	0.213499	0.830938	0.905732	AC097636.1	ENSG00000285749.1
0						AC097637.1	ENSG00000173366.11
10.2816	3.85182	1.12619	3.42022	0.000625706	0.00190562	AC098484.3	ENSG00000283580.3
0						AC098582.1	ENSG00000285385.1
9.32629	0.949809	1.45734	0.651741	0.514568	0.664201	AC098588.1	ENSG00000285713.1
3.4233	-1.09284	1.34883	-0.810215	0.417817	0.570385	AC098650.1	ENSG00000283563.1
0						AC098850.3	ENSG00000266302.6
1.64119	1.72979	2.07619	0.833155	0.404758	0.556751	AC099489.1	ENSG00000188897.9
0						AC099811.2	ENSG00000267261.5
0						AC099850.2	ENSG00000265303.1
0						AC100868.1	ENSG00000258417.3
0.871187	3.69682	2.80727	1.31688	0.18788	0.302146	AC104109.3	ENSG00000272772.1
0						AC104151.1	ENSG00000261833.2
0						AC104304.1	ENSG00000283877.1
0.400916	0	4.40736	0	1	1	AC104389.4	ENSG00000239920.2
0						AC104389.5	ENSG00000284931.1
32.417	0.171735	0.391362	0.438815	0.660796	0.789577	AC104452.1	ENSG00000283189.2
0.0747448	0	4.40736	0	1	1	AC104472.3	ENSG00000284952.1
0.685098	-0.020797	3.60576	-0.00576771	0.995398	1	AC104532.1	ENSG00000267314.1
0						AC104581.2	ENSG00000262730.1
0						AC104662.2	ENSG00000281028.1
2.70808	2.21844	1.42607	1.55562	0.119798	0.207815	AC105052.1	ENSG00000205236.6
1.61065	0.224411	2.01347	0.111455	0.911256	0.968985	AC105052.3	ENSG00000267645.5
0						AC106774.4	ENSG00000268799.3
9.42969	0.743805	0.740616	1.00431	0.315232	0.45846	AC106886.5	ENSG00000282034.1
69.0031	0.778635	0.29261	2.661	0.00779094	0.0189574	AC107871.1	ENSG00000260007.3
0.666679	3.78212	4.27881	0.88392	0.37674	0.526558	AC107959.5	ENSG00000284956.1
0						AC108488.2	ENSG00000255767.1
0						AC108941.2	ENSG00000284695.1
0						AC109583.3	ENSG00000284672.1
0						AC110275.1	ENSG00000254673.1
9.53912	0.212134	0.728313	0.291267	0.770847	0.876097	AC112128.1	ENSG00000285943.1
0.881572	0.215461	3.51777	0.0612492	0.951161	1	AC112229.3	ENSG00000257207.5
0						AC112504.2	ENSG00000285558.1
0						AC113348.1	ENSG00000285891.1
0.245084	2.34944	4.33224	0.542316	0.587601	0.727586	AC113348.2	ENSG00000285978.1
0.0657782	0	4.40736	0	1	1	AC113554.1	ENSG00000264813.6
0.241805	1.75344	4.37516	0.400771	0.688589	0.805794	AC114490.2	ENSG00000271741.1
4.79549	3.80438	1.49843	2.5389	0.01112	0.0260891	AC114490.3	ENSG00000284773.1
5.88441	3.29059	1.5061	2.18483	0.0289011	0.0604515	AC115220.1	ENSG00000241149.3
5.36274	-0.924343	1.02188	-0.904555	0.365701	0.514525	AC116366.3	ENSG00000283782.2
1.26878	0	2.77476	0	1	1	AC117378.1	ENSG00000285625.1
0						AC117457.1	ENSG00000275163.1
0						AC118470.1	ENSG00000239395.2
388.764	0.44811	0.113513	3.94764	7.89254e-05	0.000282136	AC118549.1	ENSG00000036549.12
8.00365	-0.700723	0.967214	-0.724476	0.468774	0.621349	AC118553.2	ENSG00000283761.1
0						AC119396.1	ENSG00000263264.1
0.0952398	0.940989	4.40736	0.213504	0.830934	0.905732	AC119674.2	ENSG00000284686.1
0						AC119676.1	ENSG00000284895.1
0						AC120057.2	ENSG00000262526.2
2.05799	0	2.44099	0	1	1	AC120114.4	ENSG00000281348.1
0						AC124312.1	ENSG00000214265.11
0						AC126283.2	ENSG00000285330.1
38.2998	1.74854	0.387198	4.51588	6.30539e-06	2.63978e-05	AC126755.2	ENSG00000233024.7
0						AC127029.3	ENSG00000285947.1
0						AC129492.3	ENSG00000263620.1
0						AC131097.2	ENSG00000216921.8
0.0952398	0.940989	4.40736	0.213504	0.830934	0.905732	AC131160.1	ENSG00000283765.1
0						AC134669.1	ENSG00000265118.5
0						AC134684.11	ENSG00000285975.1
0						AC134684.8	ENSG00000285687.1
0						AC134684.9	ENSG00000285765.1
0						AC134980.3	ENSG00000285472.1
0.421376	0.900044	4.30774	0.208937	0.834498	0.90814	AC135050.2	ENSG00000255439.6
0						AC135068.1	ENSG00000182974.3
0						AC135068.3	ENSG00000279408.3
0.666679	3.78212	4.27881	0.88392	0.37674	0.526558	AC135178.2	ENSG00000263809.1
0						AC136428.1	ENSG00000259680.5
0.329838	0.940965	4.40736	0.213499	0.830938	0.905732	AC137834.1	ENSG00000258830.1
0.19048	1.9644	4.35796	0.450761	0.652162	0.781729	AC138647.1	ENSG00000226490.2
0						AC138696.1	ENSG00000264668.1
4.10506	0.30961	1.4506	0.213436	0.830987	0.905732	AC138811.2	ENSG00000260342.2
1.02459	2.22112	2.78565	0.797345	0.425251	0.578283	AC138894.1	ENSG00000261832.6
0						AC139491.7	ENSG00000285476.1
0						AC139530.2	ENSG00000262660.1
0						AC140504.1	ENSG00000261130.5
0						AC142391.1	ENSG00000279686.1
0						AC144573.1	ENSG00000285880.1
0						AC187653.1	ENSG00000248767.2
0						AC233723.1	ENSG00000262165.2
13.0395	-1.54721	0.799031	-1.93635	0.0528245	0.102052	AC233992.2	ENSG00000271698.1
0						AC235565.2	ENSG00000284800.1
0						AC239799.1	ENSG00000213240.8
0						AC243547.3	ENSG00000280778.1
0						AC243756.1	ENSG00000270339.3
0						AC243967.1	ENSG00000267881.1
17.7981	0.977829	0.539461	1.8126	0.069893	0.130529	AC244197.3	ENSG00000241489.7
0.98025	-3.0984	3.50797	-0.883247	0.377103	0.52693	AC244517.10	ENSG00000279983.1
0						AC245033.1	ENSG00000260836.2
0						AC245748.1	ENSG00000267173.1
0						AC253536.7	ENSG00000285762.1
169.628	0.38418	0.160574	2.39255	0.0167318	0.0373894	ACAA1	ENSG00000060971.17
909.645	-0.0895996	0.0822055	-1.08995	0.275736	0.411695	ACAA2	ENSG00000167315.17
62.6673	0.209624	0.509451	0.411471	0.680727	0.80305	ACACA	ENSG00000278540.4
88.4139	0.627964	0.220679	2.8456	0.0044328	0.0114832	ACACB	ENSG00000076555.15
269.589	0.506438	0.136564	3.70842	0.000208554	0.000694116	ACAD10	ENSG00000111271.14
71.5403	0.656718	0.266518	2.46407	0.0137371	0.0314202	ACAD11	ENSG00000240303.7
361.349	0.272061	0.106738	2.54887	0.0108074	0.025458	ACAD8	ENSG00000151498.11
502.453	0.24345	0.0968491	2.51371	0.0119469	0.0277814	ACAD9	ENSG00000177646.18
2.97931	-0.878612	1.43601	-0.611844	0.540641	0.686264	ACADL	ENSG00000115361.7
533.397	-0.532447	0.102453	-5.19696	2.02569e-07	1.03376e-06	ACADM	ENSG00000117054.13
50.386	0.436372	0.301798	1.44591	0.148203	0.248171	ACADS	ENSG00000122971.8
238.259	0.373803	0.155332	2.40648	0.0161071	0.0361419	ACADSB	ENSG00000196177.12
1332.09	-0.0823303	0.0622538	-1.32249	0.186004	0.299512	ACADVL	ENSG00000072778.19
2.44491	-0.343252	1.49844	-0.229073	0.818812	0.905732	ACAN	ENSG00000157766.16
0.866572	4.00353	3.24911	1.23219	0.217877	0.340869	ACAP1	ENSG00000072818.11
706.54	0.604421	0.0974284	6.20375	5.51333e-10	3.80017e-09	ACAP2	ENSG00000114331.13
844.829	0.295456	0.0903972	3.26842	0.00108149	0.00315475	ACAP3	ENSG00000131584.18
396.902	-1.49505	0.119697	-12.4903	8.43102e-36	2.85971e-34	ACAT1	ENSG00000075239.13
331.043	-1.12476	0.124502	-9.03407	1.65395e-19	2.40931e-18	ACAT2	ENSG00000120437.8
502.517	0.790496	0.091291	8.65908	4.75572e-18	6.2724e-17	ACBD3	ENSG00000182827.8
79.4033	0.900007	0.233052	3.86183	0.000112541	0.00039183	ACBD4	ENSG00000181513.14
543.226	0.0748683	0.106771	0.701207	0.483174	0.635212	ACBD5	ENSG00000107897.18
656.817	-0.19281	0.0976051	-1.97541	0.048222	0.094311	ACBD6	ENSG00000230124.7
108.632	1.37956	0.219658	6.28049	3.37505e-10	2.37704e-09	ACBD7	ENSG00000176244.6
89.3207	1.31189	0.281033	4.66811	3.03984e-06	1.33679e-05	ACCS	ENSG00000110455.13
0						ACCSL	ENSG00000205126.2
414.302	0.268436	0.108776	2.46779	0.0135952	0.0311218	ACD	ENSG00000102977.14
2182.86	0.534662	0.0613261	8.71835	2.82279e-18	3.78732e-17	ACE	ENSG00000159640.15
0.0959768	-0.982539	4.40736	-0.222932	0.823589	0.905732	ACE2	ENSG00000130234.10
0						ACER1	ENSG00000167769.4
9.80746	1.10915	0.781171	1.41986	0.155649	0.258359	ACER2	ENSG00000177076.5
266.984	0.545738	0.129212	4.22359	2.40444e-05	9.29586e-05	ACER3	ENSG00000078124.11
166.571	2.49772	0.219562	11.3759	5.5118e-30	1.43193e-28	ACHE	ENSG00000087085.14
1704.84	-0.111359	0.0574815	-1.9373	0.0527088	0.101853	ACIN1	ENSG00000100813.14
36.0741	0.56255	0.371401	1.51467	0.129856	0.222029	ACKR1	ENSG00000213088.10
0.633888	1.4179	3.61863	0.391834	0.695181	0.811432	ACKR2	ENSG00000144648.15
0.730476	0.953992	3.63089	0.262743	0.792749	0.893812	ACKR3	ENSG00000144476.5
1.89915	-0.585067	1.91101	-0.306156	0.759486	0.866906	ACKR4	ENSG00000129048.6
4098.62	-1.27038	0.0577149	-22.0113	2.24333e-107	9.38461e-105	ACLY	ENSG00000131473.16
1.15447	-3.39023	3.00058	-1.12986	0.258536	0.391173	ACMSD	ENSG00000153086.13
251.167	3.60949e-05	0.123466	0.000292347	0.999767	1	ACO1	ENSG00000122729.18
995.405	-0.321027	0.0760572	-4.22087	2.43365e-05	9.40433e-05	ACO2	ENSG00000100412.15
0						ACOD1	ENSG00000102794.9
47.9411	0.942976	0.30367	3.10527	0.00190107	0.00530368	ACOT1	ENSG00000184227.7
175.845	1.21641	0.176375	6.89673	5.3212e-12	4.44979e-11	ACOT11	ENSG00000162390.17
1.20665	3.1154	3.23818	0.962081	0.336009	0.48181	ACOT12	ENSG00000172497.8
220.028	0.167096	0.154049	1.08469	0.278058	0.414431	ACOT13	ENSG00000112304.10
364.844	0.428114	0.121708	3.51754	0.000435569	0.0013666	ACOT2	ENSG00000119673.14
19.2176	0.455929	0.470225	0.969597	0.332247	0.477461	ACOT4	ENSG00000177465.4
0.270663	1.96439	4.35796	0.450759	0.652163	0.781729	ACOT6	ENSG00000205669.3
544.769	-0.674601	0.113489	-5.94421	2.77792e-09	1.78573e-08	ACOT7	ENSG00000097021.19
184.233	0.12621	0.147656	0.854759	0.392685	0.543259	ACOT8	ENSG00000101473.16
233.332	-0.265347	0.134365	-1.97483	0.0482878	0.0944171	ACOT9	ENSG00000123130.16
597.738	0.300989	0.0953627	3.15625	0.00159811	0.00452267	ACOX1	ENSG00000161533.11
0.309856	0	4.40736	0	1	1	ACOX2	ENSG00000168306.12
106.22	-0.383741	0.219719	-1.74651	0.0807231	0.147911	ACOX3	ENSG00000087008.15
1.25957	3.72362	2.41997	1.53871	0.123876	0.213572	ACOXL	ENSG00000153093.18
1271.24	-0.0359741	0.0679636	-0.529314	0.596588	0.734388	ACP1	ENSG00000143727.15
346.299	0.215654	0.224515	0.960533	0.336787	0.482721	ACP2	ENSG00000134575.9
0						ACP4	ENSG00000142513.5
1.03633	0	3.56276	0	1	1	ACP5	ENSG00000102575.11
102.79	-0.0514622	0.211761	-0.24302	0.80799	0.905732	ACP6	ENSG00000162836.11
0						ACP7	ENSG00000183760.10
0						ACPP	ENSG00000014257.15
0						ACR	ENSG00000100312.10
11.2065	-0.19952	0.641365	-0.311087	0.755735	0.86434	ACRBP	ENSG00000111644.7
3.72024	0.549751	1.22913	0.447267	0.654682	0.784135	ACRV1	ENSG00000134940.13
98.6367	0.376319	0.210112	1.79104	0.073287	0.135888	ACSBG1	ENSG00000103740.9
0.249841	-0.0207703	4.40736	-0.00471265	0.99624	1	ACSBG2	ENSG00000130377.13
71.5569	1.57749	0.278533	5.66358	1.48246e-08	8.71893e-08	ACSF2	ENSG00000167107.12
123.133	0.128989	0.218893	0.589276	0.555676	0.700066	ACSF3	ENSG00000176715.16
928.596	-0.984196	0.0846086	-11.6323	2.82232e-31	7.83098e-30	ACSL1	ENSG00000151726.13
1958.26	-0.32525	0.060796	-5.34987	8.80196e-08	4.70833e-07	ACSL3	ENSG00000123983.13
814.139	-0.503217	0.0758233	-6.63672	3.2075e-11	2.49429e-10	ACSL4	ENSG00000068366.19
1.06292	3.11839	2.57838	1.20944	0.226495	0.351596	ACSL5	ENSG00000197142.10
32.1686	1.2004	0.429953	2.79194	0.00523937	0.0132981	ACSL6	ENSG00000164398.12
0						ACSM1	ENSG00000166743.9
0						ACSM2A	ENSG00000183747.11
0						ACSM2B	ENSG00000066813.14
27.7265	0.667876	0.400552	1.66739	0.0954371	0.171105	ACSM3	ENSG00000005187.11
0.0781918	0	4.40736	0	1	1	ACSM4	ENSG00000215009.5
0						ACSM5	ENSG00000183549.10
0						ACSM6	ENSG00000173124.14
80.7428	-1.49228	0.265315	-5.62457	1.85971e-08	1.08207e-07	ACSS1	ENSG00000154930.14
201.058	-1.03918	0.158266	-6.56599	5.16873e-11	3.94126e-10	ACSS2	ENSG00000131069.19
35.9671	-0.408935	0.431724	-0.947213	0.34353	0.489878	ACSS3	ENSG00000111058.7
5.20785	-2.72804	1.43251	-1.90437	0.0568616	0.108744	ACTA1	ENSG00000143632.14
66.3579	3.70502	0.35186	10.5298	6.29477e-26	1.35487e-24	ACTA2	ENSG00000107796.13
18571.8	-0.367859	0.0452248	-8.13401	4.15311e-16	4.80553e-15	ACTB	ENSG00000075624.14
0						ACTBL2	ENSG00000169067.3
6.30331	-0.436508	1.06423	-0.410164	0.681686	0.803243	ACTC1	ENSG00000159251.7
19674.9	-0.163642	0.0517514	-3.16207	0.0015665	0.004444	ACTG1	ENSG00000184009.11
0						ACTG2	ENSG00000163017.13
8.00674	-0.368531	0.963553	-0.382471	0.702112	0.817744	ACTL10	ENSG00000182584.4
707.216	-0.356473	0.0809506	-4.40358	1.06478e-05	4.32027e-05	ACTL6A	ENSG00000136518.16
408.562	-0.021338	0.119125	-0.179123	0.857841	0.926191	ACTL6B	ENSG00000077080.9
0						ACTL7A	ENSG00000187003.6
0.312154	0	4.40736	0	1	1	ACTL7B	ENSG00000148156.7
4.34755	0.437729	1.16122	0.376957	0.706206	0.821163	ACTL8	ENSG00000117148.7
0						ACTL9	ENSG00000181786.4
1002.16	-0.269495	0.093846	-2.87167	0.00408308	0.0106568	ACTN1	ENSG00000072110.13
56.115	-0.143665	0.280397	-0.512364	0.608397	0.745838	ACTN2	ENSG00000077522.12
0.394669	0	4.40736	0	1	1	ACTN3	ENSG00000248746.5
1235.03	-0.0240067	0.0703501	-0.341247	0.732918	0.845902	ACTN4	ENSG00000130402.11
364.756	-0.141459	0.134092	-1.05494	0.291454	0.430284	ACTR10	ENSG00000131966.13
1657.99	-0.18278	0.0608268	-3.00492	0.00265649	0.00718751	ACTR1A	ENSG00000138107.12
911.082	0.232151	0.077108	3.01073	0.00260624	0.00707148	ACTR1B	ENSG00000115073.7
2487.78	-0.0746906	0.0554627	-1.34668	0.178083	0.288665	ACTR2	ENSG00000138071.13
963.542	-0.653815	0.0906371	-7.21355	5.45119e-13	4.92994e-12	ACTR3	ENSG00000115091.11
399.583	-0.0338552	0.12717	-0.266221	0.790069	0.891608	ACTR3B	ENSG00000133627.17
3.13176	-1.64332	1.58374	-1.03762	0.299446	0.439854	ACTR3C	ENSG00000106526.10
191.018	0.112939	0.161276	0.700283	0.48375	0.635868	ACTR5	ENSG00000101442.9
163.244	-0.820598	0.161835	-5.07059	3.9659e-07	1.96309e-06	ACTR6	ENSG00000075089.9
338.356	0.262745	0.12167	2.1595	0.0308116	0.0639556	ACTR8	ENSG00000113812.13
0						ACTRT1	ENSG00000123165.8
0						ACTRT2	ENSG00000169717.6
16.6334	2.89563	0.711849	4.06776	4.74666e-05	0.000175485	ACTRT3	ENSG00000184378.2
186.885	0.0946105	0.161221	0.586838	0.557312	0.701586	ACVR1	ENSG00000115170.13
1435.22	-0.0337188	0.0658913	-0.511733	0.608838	0.746239	ACVR1B	ENSG00000135503.12
2.11257	2.82959	2.16882	1.30467	0.192005	0.307717	ACVR1C	ENSG00000123612.15
225.802	0.366847	0.145684	2.5181	0.011799	0.0274962	ACVR2A	ENSG00000121989.14
999.482	-1.09758	0.081313	-13.4982	1.60311e-41	7.24506e-40	ACVR2B	ENSG00000114739.13
36.3181	-0.625002	0.34698	-1.80126	0.0716618	0.13339	ACVRL1	ENSG00000139567.12
30.6448	-1.72596	0.432269	-3.99281	6.52961e-05	0.000235948	ACY1	ENSG00000243989.8
0.534344	1.79464	4.37161	0.410521	0.681424	0.80305	ACY3	ENSG00000132744.7
53.3972	-0.631207	0.356946	-1.76836	0.0770013	0.141936	ACYP1	ENSG00000119640.8
26.9331	1.64663	0.498624	3.30235	0.000958799	0.00282157	ACYP2	ENSG00000170634.12
3.51237	1.57185	1.5902	0.988458	0.322928	0.466948	AD000671.1	ENSG00000188223.9
0.503247	1.96437	4.35796	0.450753	0.652167	0.781729	AD000671.2	ENSG00000267120.3
35.4077	-2.28289	0.403374	-5.65947	1.51837e-08	8.91408e-08	ADA	ENSG00000196839.12
1.20791	0.861175	2.45054	0.351422	0.725272	0.838842	ADA2	ENSG00000093072.16
0						ADAD1	ENSG00000164113.10
0.415098	2.74827	4.31182	0.637379	0.523878	0.670729	ADAD2	ENSG00000140955.10
127.797	0.188164	0.228806	0.822374	0.410864	0.562778	ADAL	ENSG00000168803.15
1026.39	-0.00163613	0.0860281	-0.0190186	0.984826	1	ADAM10	ENSG00000137845.14
284.564	-0.197049	0.12317	-1.59981	0.109641	0.192716	ADAM11	ENSG00000073670.13
2253.07	0.239936	0.0501208	4.78715	1.69163e-06	7.71999e-06	ADAM12	ENSG00000148848.14
650.511	-0.205451	0.0806367	-2.54786	0.0108385	0.0255167	ADAM15	ENSG00000143537.13
460.603	0.204198	0.107572	1.89823	0.0576652	0.110062	ADAM17	ENSG00000151694.13
0						ADAM18	ENSG00000168619.15
183.229	-0.0267314	0.176397	-0.151541	0.879549	0.943758	ADAM19	ENSG00000135074.15
0						ADAM2	ENSG00000104755.14
1.77671	4.43048	4.26733	1.03823	0.299163	0.439597	ADAM20	ENSG00000134007.3
4.25151	0.25373	1.33529	0.190019	0.849295	0.919764	ADAM21	ENSG00000139985.6
865.357	0.13017	0.0867864	1.49989	0.133644	0.227505	ADAM22	ENSG00000008277.14
1160.15	-0.0154785	0.0727514	-0.212758	0.831515	0.905861	ADAM23	ENSG00000114948.12
0						ADAM28	ENSG00000042980.12
12.518	2.22798	0.786685	2.83212	0.0046241	0.0119239	ADAM29	ENSG00000168594.15
0						ADAM30	ENSG00000134249.6
10.4837	0.843111	0.736994	1.14399	0.25263	0.384053	ADAM32	ENSG00000197140.14
0.568328	3.55968	4.28408	0.830909	0.406025	0.557873	ADAM33	ENSG00000149451.17
0						ADAM7	ENSG00000069206.15
14.8598	-0.884055	0.626981	-1.41002	0.158534	0.262481	ADAM8	ENSG00000151651.15
173.565	-0.028578	0.196481	-0.145449	0.884356	0.947483	ADAM9	ENSG00000168615.11
0						ADAMDEC1	ENSG00000134028.14
267.762	-0.399852	0.135096	-2.95975	0.0030789	0.00822402	ADAMTS1	ENSG00000154734.14
95.1553	-0.312803	0.222194	-1.40779	0.159193	0.263464	ADAMTS10	ENSG00000142303.13
1.13781	-0.586084	2.67789	-0.218861	0.826759	0.905732	ADAMTS12	ENSG00000151388.10
339.857	1.30754	0.134898	9.6928	3.23527e-22	5.59739e-21	ADAMTS13	ENSG00000160323.18
31.9141	-1.46553	0.409609	-3.57787	0.000346406	0.00110664	ADAMTS14	ENSG00000138316.10
12.9369	5.47237	1.14869	4.764	1.89791e-06	8.6108e-06	ADAMTS15	ENSG00000166106.3
2.66222	1.01285	1.42118	0.712684	0.476042	0.627961	ADAMTS16	ENSG00000145536.15
527.738	-0.811519	0.107342	-7.56013	4.0266e-14	4.04022e-13	ADAMTS17	ENSG00000140470.13
0.0834625	0.940989	4.40736	0.213504	0.830934	0.905732	ADAMTS18	ENSG00000140873.15
230.757	0.820011	0.149267	5.49359	3.9385e-08	2.19906e-07	ADAMTS19	ENSG00000145808.9
3167.68	-0.179355	0.0579377	-3.09566	0.00196376	0.00546457	ADAMTS2	ENSG00000087116.15
170.031	-1.25509	0.215231	-5.83138	5.49703e-09	3.39712e-08	ADAMTS20	ENSG00000173157.16
63.2386	0.088925	0.298432	0.297974	0.765723	0.872035	ADAMTS3	ENSG00000156140.9
8.04351	0.32754	0.844548	0.387828	0.698143	0.814051	ADAMTS4	ENSG00000158859.9
210.126	0.22702	0.173796	1.30625	0.191469	0.306979	ADAMTS5	ENSG00000154736.5
43.0656	-1.22231	0.32738	-3.7336	0.000188764	0.000633159	ADAMTS6	ENSG00000049192.14
464.156	-0.506741	0.0979236	-5.17486	2.2808e-07	1.15851e-06	ADAMTS7	ENSG00000136378.14
3.24431	-1.5982	1.72854	-0.92459	0.355179	0.502754	ADAMTS8	ENSG00000134917.9
1034.44	1.7276	0.0868643	19.8885	5.12003e-88	1.21063e-85	ADAMTS9	ENSG00000163638.13
1.95884	-0.130612	2.09107	-0.0624617	0.950195	1	ADAMTSL1	ENSG00000178031.16
310.121	0.423464	0.148623	2.84926	0.00438217	0.0113574	ADAMTSL2	ENSG00000197859.9
5.32434	3.91622	1.5672	2.49886	0.0124594	0.028821	ADAMTSL3	ENSG00000156218.12
12.826	0.599666	0.891925	0.672328	0.501375	0.652619	ADAMTSL4	ENSG00000143382.14
0.0810746	-0.982539	4.40736	-0.222932	0.823589	0.905732	ADAMTSL5	ENSG00000185761.10
43.4928	-1.32798	0.321767	-4.12714	3.67308e-05	0.000138622	ADAP1	ENSG00000105963.14
0.912252	3.7534	3.26922	1.1481	0.250926	0.382068	ADAP2	ENSG00000184060.10
2626.36	-0.348852	0.0535416	-6.51553	7.24315e-11	5.45325e-10	ADAR	ENSG00000160710.16
196.026	0.65994	0.153437	4.30105	1.69992e-05	6.71692e-05	ADARB1	ENSG00000197381.15
15.0078	0.871212	0.566974	1.5366	0.124392	0.214326	ADARB2	ENSG00000185736.15
260.334	0.138214	0.129749	1.06524	0.286766	0.42467	ADAT1	ENSG00000065457.10
75.9788	-0.969282	0.293221	-3.30563	0.000947616	0.00279168	ADAT2	ENSG00000189007.15
93.4211	0.618653	0.214754	2.88075	0.00396726	0.0103844	ADAT3	ENSG00000213638.5
74.0074	-0.0809648	0.290837	-0.278386	0.780716	0.884356	ADCK1	ENSG00000063761.15
279.877	0.0455997	0.129546	0.351995	0.724842	0.838411	ADCK2	ENSG00000133597.10
140.53	0.966731	0.19727	4.90054	9.55733e-07	4.50398e-06	ADCK5	ENSG00000173137.11
1504.53	0.545703	0.0702973	7.76279	8.30784e-15	8.75597e-14	ADCY1	ENSG00000164742.15
2.055	4.62204	1.86412	2.47948	0.0131574	0.0302428	ADCY10	ENSG00000143199.17
0.292574	0.940967	4.40736	0.213499	0.830938	0.905732	ADCY2	ENSG00000078295.16
695.9	-0.2936	0.0854659	-3.43529	0.000591923	0.00181356	ADCY3	ENSG00000138031.14
0.568387	2.76127	3.69878	0.746536	0.455344	0.60877	ADCY4	ENSG00000129467.13
211.768	0.241344	0.156584	1.54131	0.123242	0.212614	ADCY5	ENSG00000173175.14
1219.46	1.02838	0.0776488	13.244	4.88811e-40	2.0554e-38	ADCY6	ENSG00000174233.11
524.743	-0.237806	0.100506	-2.36609	0.0179772	0.0398125	ADCY7	ENSG00000121281.12
3.43811	5.56736	1.733	3.21255	0.00131562	0.00378359	ADCY8	ENSG00000155897.9
420.438	-0.500466	0.111167	-4.50195	6.73323e-06	2.80953e-05	ADCY9	ENSG00000162104.9
1688.95	0.3964	0.0679562	5.83317	5.4384e-09	3.36216e-08	ADCYAP1	ENSG00000141433.12
894.565	-0.675052	0.079751	-8.46449	2.57271e-17	3.26898e-16	ADCYAP1R1	ENSG00000078549.14
2118.17	-0.034389	0.0533457	-0.644645	0.519157	0.667721	ADD1	ENSG00000087274.16
2141.7	-0.179657	0.0562055	-3.19643	0.00139141	0.00398261	ADD2	ENSG00000075340.22
1351.68	0.292515	0.0633402	4.61816	3.87152e-06	1.67766e-05	ADD3	ENSG00000148700.14
0.439253	0.940959	4.40736	0.213497	0.830939	0.905732	ADGB	ENSG00000118492.16
0.6677	3.7905	4.27862	0.885917	0.375662	0.525666	ADGRA1	ENSG00000197177.15
307.764	-0.159146	0.128132	-1.24205	0.214218	0.336345	ADGRA2	ENSG00000020181.17
1276.21	-0.753	0.0667589	-11.2794	1.65909e-29	4.22939e-28	ADGRA3	ENSG00000152990.13
308.498	0.0456057	0.130179	0.350331	0.72609	0.839414	ADGRB1	ENSG00000181790.11
749.169	-0.0862664	0.0824089	-1.04681	0.295187	0.434616	ADGRB2	ENSG00000121753.12
312.038	-0.41561	0.121622	-3.41724	0.00063259	0.0019255	ADGRB3	ENSG00000135298.13
14.0193	0.863144	0.700636	1.23194	0.21797	0.340924	ADGRD1	ENSG00000111452.12
3.2177	-0.302509	1.72228	-0.175644	0.860573	0.928402	ADGRD2	ENSG00000180264.11
0						ADGRE1	ENSG00000174837.14
0						ADGRE2	ENSG00000127507.17
0						ADGRE3	ENSG00000131355.14
9.15879	4.99696	1.35552	3.68636	0.000227482	0.000752507	ADGRE5	ENSG00000123146.19
0						ADGRF1	ENSG00000153292.15
0						ADGRF2	ENSG00000164393.8
15.1616	2.09402	0.711203	2.94434	0.00323647	0.00861246	ADGRF3	ENSG00000173567.14
0						ADGRF4	ENSG00000153294.11
0						ADGRF5	ENSG00000069122.18
120.366	0.32611	0.222813	1.4636	0.143303	0.241054	ADGRG1	ENSG00000205336.11
2.95599	0.34242	1.9231	0.178056	0.858679	0.926912	ADGRG2	ENSG00000173698.17
0.0821252	0	4.40736	0	1	1	ADGRG3	ENSG00000182885.16
0.0834625	0.940989	4.40736	0.213504	0.830934	0.905732	ADGRG4	ENSG00000156920.10
0.478037	2.77026	4.31085	0.642626	0.520467	0.668932	ADGRG5	ENSG00000159618.15
77.4212	0.475906	0.236576	2.01164	0.0442578	0.0875018	ADGRG6	ENSG00000112414.14
0						ADGRG7	ENSG00000144820.7
1874.97	-0.370734	0.0605183	-6.12599	9.01236e-10	6.08847e-09	ADGRL1	ENSG00000072071.16
955.025	-0.206926	0.0752089	-2.75135	0.00593496	0.0148876	ADGRL2	ENSG00000117114.19
86.5019	-1.32956	0.289709	-4.58929	4.44748e-06	1.9068e-05	ADGRL3	ENSG00000150471.16
0						ADGRL4	ENSG00000162618.13
2.66374	2.53204	1.64144	1.54257	0.122934	0.212163	ADGRV1	ENSG00000164199.17
0						ADH1A	ENSG00000187758.7
0.459273	0	4.40736	0	1	1	ADH1B	ENSG00000196616.13
0						ADH1C	ENSG00000248144.5
0						ADH4	ENSG00000198099.8
956.928	-0.509142	0.0676449	-7.52669	5.20409e-14	5.17396e-13	ADH5	ENSG00000197894.10
0						ADH6	ENSG00000172955.17
0						ADH7	ENSG00000196344.11
18.5115	2.03321	0.600204	3.38754	0.000705231	0.0021252	ADHFE1	ENSG00000147576.16
150.266	0.160907	0.21429	0.750883	0.452723	0.605673	ADI1	ENSG00000182551.13
0						ADIG	ENSG00000182035.11
1.60648	3.46489	2.44576	1.41669	0.156573	0.259681	ADIPOQ	ENSG00000181092.9
555.083	0.602556	0.0909499	6.62514	3.46927e-11	2.68762e-10	ADIPOR1	ENSG00000159346.12
778.868	0.354028	0.0901423	3.92743	8.58581e-05	0.000304753	ADIPOR2	ENSG00000006831.9
0.0834625	0.940989	4.40736	0.213504	0.830934	0.905732	ADIRF	ENSG00000148671.13
402.484	-0.932996	0.118207	-7.8929	2.95251e-15	3.23073e-14	ADK	ENSG00000156110.13
55.3195	1.27485	0.307177	4.15021	3.32168e-05	0.000126031	ADM	ENSG00000148926.9
36.0451	0.219976	0.362493	0.606844	0.543955	0.689398	ADM2	ENSG00000128165.8
42.2897	-1.33749	0.331807	-4.03093	5.5556e-05	0.000202637	ADM5	ENSG00000224420.3
1857.57	-0.722549	0.0645326	-11.1967	4.23441e-29	1.05958e-27	ADNP	ENSG00000101126.16
740.008	-0.0867419	0.100306	-0.86477	0.387165	0.537674	ADNP2	ENSG00000101544.8
573.279	-0.119299	0.111875	-1.06637	0.286259	0.424072	ADO	ENSG00000181915.4
46.4199	-0.241481	0.326113	-0.740482	0.459007	0.612492	ADORA1	ENSG00000163485.16
1.88207	-3.71283	1.92879	-1.92495	0.0542356	0.104395	ADORA2A	ENSG00000128271.21
47.1803	-0.414422	0.349273	-1.18653	0.235413	0.362576	ADORA2B	ENSG00000170425.3
0						ADORA3	ENSG00000282608.1
530.237	-0.17973	0.0951806	-1.88831	0.0589849	0.112308	ADPGK	ENSG00000159322.17
13.288	2.50178	0.688699	3.63262	0.00028056	0.000913823	ADPRH	ENSG00000144843.11
81.5634	0.856649	0.263627	3.24947	0.00115618	0.00335404	ADPRHL1	ENSG00000153531.13
112.824	0.242778	0.193649	1.2537	0.209951	0.331076	ADPRHL2	ENSG00000116863.10
42.9169	-0.392973	0.393932	-0.997566	0.31849	0.462106	ADPRM	ENSG00000170222.11
0.837784	3.29119	3.46246	0.950536	0.34184	0.48798	ADRA1A	ENSG00000120907.17
6.19144	3.28318	1.18834	2.76283	0.00573021	0.0144139	ADRA1B	ENSG00000170214.4
1.38999	4.67104	2.49001	1.87592	0.0606669	0.115104	ADRA1D	ENSG00000171873.7
94.9387	2.26405	0.27006	8.38353	5.13624e-17	6.35795e-16	ADRA2A	ENSG00000150594.6
7.90341	2.61871	1.02352	2.55854	0.0105112	0.0248394	ADRA2B	ENSG00000274286.1
339.728	-0.388315	0.123957	-3.13267	0.00173225	0.00486598	ADRA2C	ENSG00000184160.7
0.0861957	-0.982539	4.40736	-0.222932	0.823589	0.905732	ADRB1	ENSG00000043591.5
4.25855	0.978099	1.1824	0.827214	0.408116	0.560001	ADRB2	ENSG00000169252.5
0						ADRB3	ENSG00000188778.5
821.838	-0.0209608	0.0785759	-0.266759	0.789655	0.891204	ADRM1	ENSG00000130706.12
368.176	-0.813276	0.114114	-7.12689	1.02659e-12	9.09766e-12	ADSL	ENSG00000239900.12
637.278	-1.38789	0.0953728	-14.5522	5.65251e-48	3.3054e-46	ADSS	ENSG00000035687.9
61.7492	4.08924	0.416738	9.8125	9.94715e-23	1.764e-21	ADSSL1	ENSG00000185100.10
0						ADTRP	ENSG00000111863.12
1365.84	0.729859	0.0755183	9.66466	4.26017e-22	7.30859e-21	AEBP1	ENSG00000106624.10
326.828	0.0850246	0.117691	0.722439	0.470024	0.62254	AEBP2	ENSG00000139154.14
647.314	0.257998	0.0898184	2.87244	0.00407322	0.0106327	AEN	ENSG00000181026.14
2145.45	-0.13518	0.0757078	-1.78555	0.0741727	0.137244	AES	ENSG00000104964.14
0						AF241726.2	ENSG00000250349.3
1755.35	-0.355425	0.062652	-5.67301	1.40307e-08	8.28189e-08	AFAP1	ENSG00000196526.10
86.06	-0.257357	0.238216	-1.08035	0.279984	0.416783	AFAP1L1	ENSG00000157510.13
39.6381	0.929482	0.377851	2.45992	0.0138969	0.0317461	AFAP1L2	ENSG00000169129.14
603.279	-0.286801	0.0919786	-3.11813	0.00182003	0.00509853	AFDN	ENSG00000130396.20
771.557	-0.409141	0.0897048	-4.56097	5.09168e-06	2.16217e-05	AFF1	ENSG00000172493.20
23.4555	1.97293	0.539138	3.65942	0.000252783	0.000829476	AFF2	ENSG00000155966.13
256.39	0.191354	0.137453	1.39214	0.163879	0.269688	AFF3	ENSG00000144218.18
1967.45	0.332779	0.0721741	4.61078	4.01159e-06	1.73329e-05	AFF4	ENSG00000072364.12
18.9715	0.625653	0.504572	1.23997	0.214987	0.337261	AFG1L	ENSG00000135537.16
771.97	-0.480084	0.0845935	-5.6752	1.3853e-08	8.18293e-08	AFG3L2	ENSG00000141385.9
0						AFM	ENSG00000079557.4
145.689	-0.490374	0.182024	-2.69401	0.00705983	0.0173649	AFMID	ENSG00000183077.15
0						AFP	ENSG00000081051.7
367.877	0.269919	0.111702	2.41641	0.0156743	0.0353046	AFTPH	ENSG00000119844.15
40.406	0.0488115	0.354025	0.137876	0.890338	0.952079	AGA	ENSG00000038002.8
2897.44	0.496393	0.0578959	8.57389	1.00043e-17	1.29232e-16	AGAP1	ENSG00000157985.18
841.904	0.91746	0.0931465	9.84964	6.87888e-23	1.236e-21	AGAP2	ENSG00000135439.11
1129.36	0.276505	0.0700517	3.94715	7.90861e-05	0.000282525	AGAP3	ENSG00000133612.18
151.773	0.294281	0.327572	0.89837	0.368989	0.518389	AGAP4	ENSG00000188234.13
6.23726	0.656416	0.978712	0.670694	0.502415	0.653556	AGAP5	ENSG00000172650.13
238.988	0.922552	0.1476	6.25034	4.09571e-10	2.86664e-09	AGAP6	ENSG00000204149.10
153.454	0.71026	0.184845	3.84246	0.000121807	0.000421838	AGAP9	ENSG00000204172.12
33.201	-0.391176	0.392562	-0.996468	0.319023	0.462777	AGBL1	ENSG00000273540.3
0.0781918	0	4.40736	0	1	1	AGBL2	ENSG00000165923.15
47.1441	1.65172	0.359731	4.59154	4.39978e-06	1.88802e-05	AGBL3	ENSG00000146856.14
20.5681	1.55848	0.549229	2.83758	0.00454576	0.0117441	AGBL4	ENSG00000186094.16
696.764	0.754235	0.092764	8.13069	4.26862e-16	4.93568e-15	AGBL5	ENSG00000084693.15
0						AGER	ENSG00000204305.13
949.382	0.0324392	0.0691309	0.469244	0.638896	0.77355	AGFG1	ENSG00000173744.17
75.8737	-0.213621	0.262404	-0.81409	0.415593	0.568111	AGFG2	ENSG00000106351.12
317.505	0.227906	0.126148	1.80666	0.0708153	0.132085	AGGF1	ENSG00000164252.12
138.673	-0.700355	0.235578	-2.97292	0.00294977	0.00791149	AGK	ENSG00000006530.16
381.723	0.217316	0.115527	1.88108	0.0599608	0.113897	AGL	ENSG00000162688.16
0.0959768	-0.982539	4.40736	-0.222932	0.823589	0.905732	AGMAT	ENSG00000116771.5
0.624698	0	4.34085	0	1	1	AGMO	ENSG00000187546.13
439.313	-0.19448	0.100905	-1.92736	0.0539343	0.10395	AGO1	ENSG00000092847.11
1094.79	-0.75505	0.0674488	-11.1944	4.34274e-29	1.08502e-27	AGO2	ENSG00000123908.11
286.46	0.496623	0.129808	3.82582	0.000130338	0.000448527	AGO3	ENSG00000126070.19
138.137	0.0231753	0.196183	0.118131	0.905964	0.964566	AGO4	ENSG00000134698.10
111.223	-0.078761	0.216989	-0.362972	0.716626	0.831088	AGPAT1	ENSG00000204310.12
6.02945	3.19804	1.08722	2.94148	0.00326643	0.0086851	AGPAT2	ENSG00000169692.12
627.217	-0.623221	0.0914781	-6.81279	9.57215e-12	7.79289e-11	AGPAT3	ENSG00000160216.18
206.038	0.316678	0.14861	2.13094	0.0330942	0.0679672	AGPAT4	ENSG00000026652.13
1390.49	-0.515063	0.0784272	-6.5674	5.12027e-11	3.90726e-10	AGPAT5	ENSG00000155189.11
1306.75	-0.241051	0.0803806	-2.99887	0.00270979	0.00732322	AGPS	ENSG00000018510.14
0.149241	0.94098	4.40736	0.213502	0.830935	0.905732	AGR2	ENSG00000106541.11
0						AGR3	ENSG00000173467.8
160.286	1.82481	0.190802	9.56393	1.13367e-21	1.89895e-20	AGRN	ENSG00000188157.14
0						AGRP	ENSG00000159723.4
0						AGT	ENSG00000135744.7
794.112	-0.276692	0.0817248	-3.38566	0.000710083	0.00213745	AGTPBP1	ENSG00000135049.15
3.72454	-1.06083	1.31944	-0.803997	0.421399	0.574219	AGTR1	ENSG00000144891.17
0						AGTR2	ENSG00000180772.6
55.4304	-0.0418042	0.308652	-0.135441	0.892263	0.95354	AGTRAP	ENSG00000177674.15
0						AGXT	ENSG00000172482.4
0						AGXT2	ENSG00000113492.13
1185.83	-0.102531	0.0732557	-1.39963	0.161625	0.266758	AHCTF1	ENSG00000153207.15
2171.51	-1.58664	0.0684435	-23.1817	6.96747e-119	3.55232e-116	AHCY	ENSG00000101444.12
1304.38	-0.49058	0.062107	-7.89894	2.8128e-15	3.08614e-14	AHCYL1	ENSG00000168710.17
259.375	0.392992	0.14275	2.753	0.00590517	0.0148213	AHCYL2	ENSG00000158467.16
120.85	0.0199553	0.203027	0.0982889	0.921703	0.977054	AHDC1	ENSG00000126705.14
245.021	0.00741281	0.134468	0.0551269	0.956037	1	AHI1	ENSG00000135541.20
8982.35	0.954602	0.0626667	15.233	2.13578e-52	1.49551e-50	AHNAK	ENSG00000124942.13
182.009	1.90221	0.186353	10.2075	1.83464e-24	3.61936e-23	AHNAK2	ENSG00000185567.6
140.059	1.48365	0.238142	6.23013	4.66056e-10	3.24114e-09	AHR	ENSG00000106546.13
341.169	0.719858	0.122532	5.87488	4.23155e-09	2.6502e-08	AHRR	ENSG00000063438.16
936.411	-0.152497	0.0800764	-1.9044	0.0568581	0.108744	AHSA1	ENSG00000100591.7
3.84484	0.288738	1.46422	0.197196	0.843674	0.915318	AHSG	ENSG00000145192.12
0						AHSP	ENSG00000169877.9
0						AICDA	ENSG00000111732.10
519.555	-0.299913	0.0893459	-3.35676	0.000788613	0.00235171	AIDA	ENSG00000186063.12
0						AIF1	ENSG00000204472.12
33.2416	-0.191214	0.409777	-0.466628	0.640766	0.775391	AIF1L	ENSG00000126878.12
345.623	-0.580407	0.113301	-5.12271	3.01177e-07	1.51144e-06	AIFM1	ENSG00000156709.13
65.9456	1.80722	0.317738	5.68777	1.2871e-08	7.63324e-08	AIFM2	ENSG00000042286.14
15.8019	0.579586	0.607369	0.954257	0.339954	0.486053	AIFM3	ENSG00000183773.15
158.75	0.599244	0.171825	3.48752	0.000487513	0.00151761	AIG1	ENSG00000146416.18
15.8856	0.845804	0.704533	1.20052	0.229939	0.355735	AIM2	ENSG00000163568.14
297.755	-1.05975	0.139799	-7.58054	3.44126e-14	3.46356e-13	AIMP1	ENSG00000164022.16
443.671	-0.597714	0.120341	-4.96683	6.80554e-07	3.26951e-06	AIMP2	ENSG00000106305.9
288.853	-0.566645	0.121948	-4.64663	3.37409e-06	1.47424e-05	AIP	ENSG00000110711.9
0.166925	1.79467	4.37161	0.410528	0.681419	0.80305	AIPL1	ENSG00000129221.15
0						AIRE	ENSG00000160224.16
417.915	0.0214428	0.115432	0.185762	0.852631	0.922153	AJAP1	ENSG00000196581.10
72.9457	0.151199	0.300329	0.503446	0.614651	0.75167	AJM1	ENSG00000232434.2
13.888	-2.13784	0.728605	-2.93416	0.00334455	0.00888123	AJUBA	ENSG00000129474.15
101.295	0.916107	0.266311	3.43999	0.000581744	0.00178506	AK1	ENSG00000106992.18
629.434	-0.748827	0.0997951	-7.50364	6.20694e-14	6.12251e-13	AK2	ENSG00000004455.16
678.156	0.00603257	0.0766944	0.0786572	0.937305	0.989933	AK3	ENSG00000147853.16
577.374	-1.71066	0.0980479	-17.4472	3.6139e-68	4.46672e-66	AK4	ENSG00000162433.14
54.7544	-0.918155	0.30632	-2.99737	0.00272319	0.00735577	AK5	ENSG00000154027.18
0						AK6	ENSG00000085231.13
60.2827	0.62589	0.30751	2.03534	0.0418162	0.0833819	AK7	ENSG00000140057.8
1.94158	2.99494	1.93285	1.54949	0.121264	0.209757	AK8	ENSG00000165695.9
36.3188	0.361467	0.407124	0.887855	0.374619	0.52476	AK9	ENSG00000155085.15
1.8108	-0.22915	2.23597	-0.102484	0.918373	0.974711	AKAIN1	ENSG00000231824.3
1420.94	-1.04443	0.0657038	-15.8961	6.7417e-57	5.61178e-55	AKAP1	ENSG00000121057.12
248.985	0.308538	0.160426	1.92324	0.0544495	0.104757	AKAP10	ENSG00000108599.14
1586.77	-0.159106	0.0675155	-2.35659	0.0184435	0.040751	AKAP11	ENSG00000023516.8
746.642	-0.272051	0.0772317	-3.52254	0.00042744	0.00134316	AKAP12	ENSG00000131016.16
910.635	-0.28577	0.084358	-3.38758	0.000705115	0.0021252	AKAP13	ENSG00000170776.21
0.571439	3.55899	4.2841	0.830746	0.406117	0.557873	AKAP14	ENSG00000186471.12
0.0810746	-0.982539	4.40736	-0.222932	0.823589	0.905732	AKAP17A	ENSG00000197976.11
2.78398	-3.33044	1.818	-1.83192	0.0669633	0.125706	AKAP2	ENSG00000241978.9
6.02434	1.47624	1.03771	1.42259	0.154854	0.257343	AKAP3	ENSG00000111254.7
27.7329	1.52758	0.428086	3.5684	0.000359162	0.00114448	AKAP4	ENSG00000147081.14
85.9839	-0.441623	0.224377	-1.96822	0.0490426	0.0956635	AKAP5	ENSG00000179841.8
317.175	0.476744	0.11735	4.06259	4.85319e-05	0.000179019	AKAP6	ENSG00000151320.10
30.9743	-0.358578	0.419401	-0.854978	0.392563	0.543178	AKAP7	ENSG00000118507.16
367.753	0.322865	0.108417	2.97799	0.00290149	0.00778967	AKAP8	ENSG00000105127.8
1544.27	1.42162	0.0781729	18.1855	6.71813e-74	9.87444e-72	AKAP8L	ENSG00000011243.17
850.709	-0.0324701	0.0858765	-0.378103	0.705354	0.8207	AKAP9	ENSG00000127914.16
147.214	0.201835	0.187521	1.07633	0.281778	0.418651	AKIP1	ENSG00000166452.11
443.017	0.0700101	0.106663	0.656367	0.511588	0.661218	AKIRIN1	ENSG00000174574.15
483.786	-0.016483	0.0917667	-0.179619	0.857452	0.925893	AKIRIN2	ENSG00000135334.8
70.9812	-0.573652	0.285736	-2.00762	0.0446832	0.088268	AKNA	ENSG00000106948.16
2.90909	4.94562	3.67846	1.34448	0.178793	0.289501	AKNAD1	ENSG00000162641.18
641.435	-1.15703	0.0939994	-12.3089	8.11649e-35	2.61701e-33	AKR1A1	ENSG00000117448.13
1754.51	-0.511697	0.0637547	-8.02603	1.00677e-15	1.13671e-14	AKR1B1	ENSG00000085662.13
0.0781918	0	4.40736	0	1	1	AKR1B10	ENSG00000198074.9
0						AKR1B15	ENSG00000227471.8
62.112	-0.285471	0.272171	-1.04886	0.29424	0.433456	AKR1C1	ENSG00000187134.13
57.7846	-0.638437	0.280339	-2.27738	0.0227636	0.0489894	AKR1C2	ENSG00000151632.17
40.3106	0.96857	0.399685	2.42333	0.0153787	0.0347561	AKR1C3	ENSG00000196139.13
0						AKR1C4	ENSG00000198610.10
0						AKR1C8P	ENSG00000264006.8
0						AKR1D1	ENSG00000122787.14
46.6041	0.109977	0.356035	0.308894	0.757402	0.865516	AKR1E2	ENSG00000165568.17
163.422	-0.150171	0.163333	-0.919416	0.357878	0.505785	AKR7A2	ENSG00000053371.12
3.56279	-3.5616	1.4121	-2.5222	0.0116624	0.0272167	AKR7A3	ENSG00000162482.4
1870.97	-0.278455	0.0513937	-5.41808	6.02424e-08	3.29044e-07	AKT1	ENSG00000142208.16
500.678	-0.0668064	0.10205	-0.654643	0.512698	0.662338	AKT1S1	ENSG00000204673.10
1466.6	-0.0643722	0.0582767	-1.1046	0.269335	0.403834	AKT2	ENSG00000105221.16
53.3341	-0.0248	0.691337	-0.0358725	0.971384	1	AKT3	ENSG00000117020.16
209.985	0.42084	0.172037	2.44622	0.0144363	0.0328629	AKTIP	ENSG00000166971.16
0						AL020996.2	ENSG00000255054.3
0.739914	-3.96119	3.77897	-1.04822	0.294538	0.433856	AL021546.1	ENSG00000111780.8
0						AL021997.3	ENSG00000276302.1
9.66669	0.499989	0.888362	0.562822	0.573556	0.716397	AL022238.4	ENSG00000284431.1
0						AL022312.1	ENSG00000285025.1
0						AL022318.4	ENSG00000284554.2
0						AL024498.2	ENSG00000272162.1
1.02631	-0.648527	2.25113	-0.288089	0.773278	0.87782	AL031281.2	ENSG00000285721.1
0						AL031315.1	ENSG00000285733.1
1.05595	-3.43043	2.93376	-1.16929	0.242285	0.371093	AL031708.1	ENSG00000261732.1
10.4274	1.19142	0.70276	1.69534	0.0900107	0.162663	AL031777.3	ENSG00000282988.2
0.0918546	0	4.40736	0	1	1	AL031847.2	ENSG00000285629.1
2.03211	4.68915	1.90698	2.45893	0.013935	0.0318283	AL032819.3	ENSG00000284395.1
0						AL033529.1	ENSG00000254553.1
0						AL034430.1	ENSG00000285508.1
0						AL034430.2	ENSG00000285723.1
0						AL035078.4	ENSG00000285283.1
0						AL035425.2	ENSG00000260548.1
0						AL035460.1	ENSG00000241690.3
0.344783	-2.85766	4.30888	-0.663203	0.507201	0.657475	AL049557.1	ENSG00000284755.1
0						AL049629.2	ENSG00000284969.1
0.0810746	-0.982539	4.40736	-0.222932	0.823589	0.905732	AL049634.2	ENSG00000260861.6
0.674642	-1.99245	3.77659	-0.527579	0.597792	0.735424	AL049650.1	ENSG00000256566.1
1.36538	-4.51991	2.72762	-1.65709	0.0975007	0.17425	AL049697.1	ENSG00000213204.8
0.839908	1.76244	3.25323	0.541749	0.587991	0.727906	AL049779.1	ENSG00000258466.5
0.33385	2.79199	4.3099	0.647809	0.517109	0.665568	AL049839.2	ENSG00000273259.3
0						AL049844.1	ENSG00000257065.1
0						AL049844.3	ENSG00000280148.1
0.243224	-2.36178	4.33397	-0.544947	0.58579	0.726339	AL080251.1	ENSG00000255275.3
136.742	0.112617	0.201438	0.559066	0.576116	0.719154	AL096711.2	ENSG00000255330.9
0						AL096814.1	ENSG00000214732.2
0						AL096870.1	ENSG00000258973.1
0						AL109811.4	ENSG00000277726.4
0						AL109827.1	ENSG00000272897.5
0						AL110118.2	ENSG00000259066.5
7.75043	0.148246	0.746858	0.198493	0.84266	0.914686	AL117339.5	ENSG00000283930.1
0.407234	0.589461	4.30075	0.13706	0.890983	0.952706	AL117348.2	ENSG00000255835.1
0						AL121578.2	ENSG00000229674.2
0.671705	0.735885	3.00797	0.244645	0.806731	0.904651	AL121594.1	ENSG00000258790.1
0						AL121722.1	ENSG00000283932.1
0.323244	2.74827	4.31182	0.637381	0.523877	0.670729	AL121753.1	ENSG00000261582.1
0						AL121758.1	ENSG00000270299.1
0						AL121845.2	ENSG00000273047.1
89.9207	-0.146479	0.246025	-0.595383	0.551587	0.697014	AL121845.3	ENSG00000273154.3
0.160366	0	4.40736	0	1	1	AL121900.2	ENSG00000284776.1
0						AL132671.2	ENSG00000282218.1
0						AL132780.3	ENSG00000259132.1
5.28518	3.85183	1.46132	2.63586	0.00839242	0.0202488	AL133352.1	ENSG00000255339.6
1.64674	-1.54233	2.33566	-0.660341	0.509035	0.659015	AL133353.2	ENSG00000285932.1
0						AL133410.3	ENSG00000285645.1
0.498124	3.36863	4.2893	0.785356	0.432245	0.58504	AL133500.1	ENSG00000285547.1
278.296	0.359906	0.133081	2.7044	0.00684269	0.0169072	AL135905.2	ENSG00000285976.1
0.14949	0	4.40736	0	1	1	AL136295.1	ENSG00000254692.1
0						AL136295.3	ENSG00000259371.2
2.95134	0.0585105	1.3788	0.0424357	0.966151	1	AL136295.4	ENSG00000259522.3
35.8986	2.12816	0.381317	5.58108	2.39023e-08	1.36638e-07	AL136295.5	ENSG00000259529.1
4.24401	0.532159	1.26976	0.419104	0.67514	0.799805	AL136373.1	ENSG00000282881.2
2.75351	-2.44653	1.60975	-1.51982	0.128555	0.220243	AL136454.1	ENSG00000231767.4
0.96281	0.94098	3.00331	0.313314	0.754042	0.863009	AL136531.2	ENSG00000274322.1
0.454535	0.940958	4.40736	0.213497	0.830939	0.905732	AL138752.2	ENSG00000255872.3
0.575267	0	4.40736	0	1	1	AL139011.2	ENSG00000258465.7
0.224234	0	4.40736	0	1	1	AL139142.2	ENSG00000285777.1
0.166925	1.79467	4.37161	0.410528	0.681419	0.80305	AL139300.1	ENSG00000256500.5
2.67139	0.940995	2.1753	0.432581	0.665319	0.793526	AL139353.1	ENSG00000203546.7
0.163646	0.94098	4.40736	0.213502	0.830935	0.905732	AL157392.5	ENSG00000282246.1
10.7499	1.07732	0.70835	1.52088	0.12829	0.219882	AL157935.2	ENSG00000257524.6
0						AL159163.1	ENSG00000249141.1
0						AL160269.1	ENSG00000285269.2
0						AL160272.2	ENSG00000285082.1
15.8872	0.453052	0.650676	0.696279	0.486254	0.638541	AL162231.1	ENSG00000187186.14
0.160366	0	4.40736	0	1	1	AL162231.3	ENSG00000258728.1
112.75	-0.7894	0.201805	-3.9117	9.16503e-05	0.000323582	AL162377.3	ENSG00000285444.1
0						AL162417.1	ENSG00000285245.1
0						AL162596.1	ENSG00000285946.1
0						AL163195.3	ENSG00000259060.7
0						AL163636.2	ENSG00000259171.1
0						AL353572.3	ENSG00000283205.1
5.06144	1.39895	0.995496	1.40528	0.159939	0.264512	AL353588.1	ENSG00000272442.2
0						AL354761.1	ENSG00000236543.2
0						AL355102.2	ENSG00000258691.1
0.325085	-0.819001	4.37641	-0.18714	0.851551	0.921231	AL355312.5	ENSG00000285991.1
0						AL355315.1	ENSG00000249967.1
0						AL355916.2	ENSG00000258989.1
0						AL355987.1	ENSG00000204003.8
0.0781918	0	4.40736	0	1	1	AL355987.3	ENSG00000272896.1
1.13895	3.55188	2.91449	1.21869	0.22296	0.347143	AL357673.1	ENSG00000256407.2
0						AL358075.4	ENSG00000278139.1
0.662037	0	3.89682	0	1	1	AL358113.1	ENSG00000285130.1
10.9064	1.94988	0.716755	2.72043	0.00651975	0.0162099	AL358472.6	ENSG00000285641.1
0						AL358472.7	ENSG00000285779.1
0						AL359736.1	ENSG00000273167.1
0						AL359922.1	ENSG00000264545.1
0.245466	-0.982557	4.40736	-0.222936	0.823586	0.905732	AL360181.3	ENSG00000254536.1
48.2825	-0.0827995	0.29736	-0.278449	0.780668	0.884356	AL365205.1	ENSG00000124593.16
0						AL365214.3	ENSG00000281613.2
0						AL365232.1	ENSG00000243501.5
0						AL365273.2	ENSG00000270099.1
58.4584	0.445653	0.267419	1.6665	0.0956145	0.171367	AL391650.1	ENSG00000236782.7
0						AL445238.1	ENSG00000285566.1
0						AL445685.3	ENSG00000285839.1
0						AL445989.1	ENSG00000237378.3
0						AL449266.1	ENSG00000274068.1
0						AL451007.3	ENSG00000284188.2
1.22595	4.23208	2.67026	1.58489	0.11299	0.197727	AL451062.3	ENSG00000284989.1
0						AL512428.1	ENSG00000282804.1
0						AL512506.3	ENSG00000281883.1
0.35232	-1.99728	4.35862	-0.458236	0.646783	0.779746	AL512785.2	ENSG00000254706.2
0.979788	0.981494	2.86992	0.341993	0.732356	0.845365	AL513165.2	ENSG00000256966.6
0						AL583836.1	ENSG00000276490.1
0.656194	3.0805	3.47418	0.886685	0.375249	0.525268	AL589666.1	ENSG00000271793.1
1.72156	-0.974582	2.05782	-0.473599	0.635786	0.770908	AL590132.1	ENSG00000284299.1
0						AL590764.2	ENSG00000285171.1
0.242433	2.33504	4.33309	0.538886	0.589966	0.72815	AL591806.3	ENSG00000270149.5
0						AL592490.1	ENSG00000197991.11
0.160366	0	4.40736	0	1	1	AL603832.3	ENSG00000271810.5
0						AL645922.1	ENSG00000244255.5
0						AL645941.2	ENSG00000248993.1
0						AL662820.1	ENSG00000285064.1
0						AL662884.4	ENSG00000285085.1
0						AL662899.1	ENSG00000204422.7
0.344783	-2.85766	4.30888	-0.663203	0.507201	0.657475	AL662899.2	ENSG00000263020.6
0						AL669918.1	ENSG00000250264.1
0						AL672043.1	ENSG00000250719.1
0						AL672142.1	ENSG00000251184.1
0						AL691442.1	ENSG00000251246.1
0						AL713999.1	ENSG00000273088.1
0						AL772284.2	ENSG00000277535.2
0						AL807752.6	ENSG00000279073.3
0						AL807752.7	ENSG00000284341.1
0						AL845331.2	ENSG00000259916.1
0.476199	3.29494	4.2915	0.767782	0.442616	0.594893	AL928654.3	ENSG00000257341.5
0						AL929554.1	ENSG00000261793.1
350.147	0.617339	0.116245	5.31068	1.09219e-07	5.77793e-07	ALAD	ENSG00000148218.15
477.188	0.190969	0.106748	1.78897	0.0736199	0.136397	ALAS1	ENSG00000023330.14
0						ALAS2	ENSG00000158578.20
1.74962	2.23258	1.9755	1.13014	0.258419	0.391104	ALB	ENSG00000163631.16
910.516	-0.348565	0.0800375	-4.35502	1.33055e-05	5.33232e-05	ALCAM	ENSG00000170017.12
165.904	-1.01778	0.162913	-6.2474	4.17343e-10	2.91979e-09	ALDH16A1	ENSG00000161618.9
1377.96	-1.07239	0.067602	-15.8633	1.13843e-56	9.28676e-55	ALDH18A1	ENSG00000059573.8
0						ALDH1A1	ENSG00000165092.12
1.24637	3.11173	2.44268	1.2739	0.2027	0.321228	ALDH1A2	ENSG00000128918.14
37.1744	0.704815	0.386473	1.82371	0.068196	0.127751	ALDH1A3	ENSG00000184254.16
442.953	-0.422388	0.118763	-3.55656	0.000375739	0.00119218	ALDH1B1	ENSG00000137124.7
7.35915	1.15502	0.896187	1.28881	0.197463	0.314763	ALDH1L1	ENSG00000144908.13
455.209	-1.19767	0.116005	-10.3243	5.47172e-25	1.11589e-23	ALDH1L2	ENSG00000136010.13
488.207	-0.463529	0.122799	-3.77468	0.000160211	0.000542515	ALDH2	ENSG00000111275.12
7.95535	2.4656	0.945034	2.609	0.00908071	0.0217838	ALDH3A1	ENSG00000108602.17
669.614	-0.11316	0.0942525	-1.20061	0.229903	0.355735	ALDH3A2	ENSG00000072210.18
10.0334	0.529766	0.686808	0.771346	0.440502	0.592969	ALDH3B1	ENSG00000006534.15
0.0834625	0.940989	4.40736	0.213504	0.830934	0.905732	ALDH3B2	ENSG00000132746.14
88.2059	-1.03149	0.241884	-4.26439	2.00451e-05	7.84072e-05	ALDH4A1	ENSG00000159423.16
433.05	-0.499891	0.105734	-4.72783	2.26936e-06	1.01772e-05	ALDH5A1	ENSG00000112294.12
67.3711	0.0424905	0.248385	0.171067	0.864171	0.930992	ALDH6A1	ENSG00000119711.12
972.291	-1.23125	0.0724753	-16.9886	9.98195e-65	1.10786e-62	ALDH7A1	ENSG00000164904.17
6.98498	1.41679	0.886112	1.59888	0.109847	0.193057	ALDH8A1	ENSG00000118514.13
415.971	0.217615	0.139387	1.56123	0.118469	0.205795	ALDH9A1	ENSG00000143149.12
801.463	-0.425071	0.0925018	-4.59528	4.32177e-06	1.85698e-05	ALDOA	ENSG00000149925.18
5.10084	3.35091	1.3673	2.45075	0.014256	0.0324977	ALDOB	ENSG00000136872.18
211.989	-1.02334	0.165009	-6.20168	5.5862e-10	3.84435e-09	ALDOC	ENSG00000109107.13
335.585	-0.0648895	0.116985	-0.554682	0.579112	0.721734	ALG1	ENSG00000033011.12
62.54	0.479785	0.305026	1.57293	0.115734	0.201861	ALG10	ENSG00000139133.6
369.321	0.438705	0.121132	3.6217	0.000292676	0.000949683	ALG10B	ENSG00000175548.8
134.002	0.43754	0.211622	2.06756	0.0386816	0.0778164	ALG11	ENSG00000253710.3
267.111	0.29428	0.132811	2.21577	0.026707	0.0563752	ALG12	ENSG00000182858.13
313.627	-0.245618	0.154864	-1.58602	0.112734	0.197409	ALG13	ENSG00000101901.11
89.0911	0.298076	0.242702	1.22816	0.219388	0.342635	ALG14	ENSG00000172339.9
0						ALG1L	ENSG00000189366.9
0.0952398	0.940989	4.40736	0.213504	0.830934	0.905732	ALG1L2	ENSG00000251287.8
289.067	0.312744	0.139081	2.24865	0.024535	0.0523526	ALG2	ENSG00000119523.9
450.95	-0.631038	0.115406	-5.46799	4.55156e-08	2.52152e-07	ALG3	ENSG00000214160.9
288.03	0.225877	0.123177	1.83375	0.0666905	0.12528	ALG5	ENSG00000120697.8
111.341	-0.0832076	0.201593	-0.412751	0.679789	0.80305	ALG6	ENSG00000088035.16
370.402	0.176221	0.131558	1.3395	0.180409	0.291625	ALG8	ENSG00000159063.12
198.8	-0.0410234	0.151288	-0.271161	0.786267	0.88867	ALG9	ENSG00000086848.14
17853.6	0.546782	0.0467098	11.7059	1.18824e-31	3.3598e-30	ALK	ENSG00000171094.17
1.70702	4.35331	2.35341	1.84979	0.0643437	0.12122	ALKAL1	ENSG00000196711.8
0.869355	0	3.14433	0	1	1	ALKAL2	ENSG00000189292.15
147.575	-0.52175	0.189754	-2.74961	0.00596657	0.0149577	ALKBH1	ENSG00000100601.9
213.425	-1.23457	0.149741	-8.24466	1.65625e-16	1.97527e-15	ALKBH2	ENSG00000189046.10
101.147	1.09523	0.23829	4.59619	4.30296e-06	1.84939e-05	ALKBH3	ENSG00000166199.12
162.287	0.0157339	0.170343	0.0923659	0.926407	0.980686	ALKBH4	ENSG00000160993.3
716.127	-0.15374	0.0990262	-1.55252	0.120538	0.20881	ALKBH5	ENSG00000091542.8
75.6519	0.621709	0.285775	2.17551	0.0295916	0.0617137	ALKBH6	ENSG00000239382.10
184.956	-0.601411	0.15968	-3.76634	0.000165658	0.000559569	ALKBH7	ENSG00000125652.7
169.85	-0.867602	0.170239	-5.09636	3.46243e-07	1.7254e-06	ALKBH8	ENSG00000137760.14
2.37	-0.15996	1.59392	-0.100356	0.920062	0.975783	ALLC	ENSG00000151360.9
809.587	-0.447519	0.0855944	-5.22836	1.71017e-07	8.81839e-07	ALMS1	ENSG00000116127.17
0.178102	-0.982548	4.40736	-0.222934	0.823587	0.905732	ALOX12	ENSG00000108839.11
1.0585	-0.98258	2.6632	-0.368947	0.712167	0.826976	ALOX12B	ENSG00000179477.10
0.0657782	0	4.40736	0	1	1	ALOX15	ENSG00000161905.12
0						ALOX15B	ENSG00000179593.15
0						ALOX5	ENSG00000012779.10
0.175423	0.94098	4.40736	0.213502	0.830935	0.905732	ALOX5AP	ENSG00000132965.9
0.991324	1.40856	2.91762	0.482777	0.629254	0.765227	ALOXE3	ENSG00000179148.9
0						ALPG	ENSG00000163286.8
0						ALPI	ENSG00000163295.4
1.02523	2.76958	2.59007	1.06931	0.284931	0.422681	ALPK1	ENSG00000073331.17
0.945446	-1.48319	3.13464	-0.47316	0.636099	0.771092	ALPK2	ENSG00000198796.6
6.54383	-0.47192	0.848687	-0.556059	0.57817	0.720864	ALPK3	ENSG00000136383.6
23.9514	-1.17013	0.502183	-2.33008	0.019802	0.0433593	ALPL	ENSG00000162551.13
0						ALPP	ENSG00000163283.6
531.519	0.156841	0.114043	1.37528	0.169046	0.276379	ALS2	ENSG00000003393.14
18.5468	3.41376	0.617426	5.52901	3.22045e-08	1.81491e-07	ALS2CL	ENSG00000178038.16
0.911323	3.14393	2.80131	1.12231	0.261732	0.394946	ALS2CR12	ENSG00000155749.12
25.4791	-0.412711	0.406153	-1.01615	0.30956	0.451701	ALX1	ENSG00000180318.3
79.3123	0.401223	0.240214	1.67028	0.0948646	0.170303	ALX3	ENSG00000156150.7
2.01018	4.28248	2.14883	1.99294	0.0462678	0.0909141	ALX4	ENSG00000052850.6
1036.46	-0.563528	0.140205	-4.01931	5.83689e-05	0.000212328	ALYREF	ENSG00000183684.7
46.6361	0.484006	0.350872	1.37944	0.16776	0.274689	AMACR	ENSG00000242110.7
0.517559	2.79197	4.3099	0.647804	0.517112	0.665568	AMBN	ENSG00000178522.14
0						AMBP	ENSG00000106927.11
577.54	0.131727	0.091408	1.44109	0.14956	0.250008	AMBRA1	ENSG00000110497.14
604.679	-0.867099	0.090684	-9.56176	1.15773e-21	1.93727e-20	AMD1	ENSG00000123505.15
7.96587	5.56223	1.37616	4.04186	5.30294e-05	0.000194159	AMDHD1	ENSG00000139344.7
319.303	0.00710808	0.140053	0.0507526	0.959523	1	AMDHD2	ENSG00000162066.15
0						AMELX	ENSG00000125363.14
0						AMELY	ENSG00000099721.13
331.774	-1.05205	0.12086	-8.7047	3.18413e-18	4.25463e-17	AMER1	ENSG00000184675.10
355.486	0.0606357	0.117891	0.514335	0.607018	0.744568	AMER2	ENSG00000165566.12
178.602	-0.554969	0.18886	-2.93853	0.00329776	0.00876413	AMER3	ENSG00000178171.10
341.154	-0.511055	0.132407	-3.85973	0.000113513	0.000395127	AMFR	ENSG00000159461.14
1584.34	0.256609	0.0693944	3.69784	0.00021744	0.000721191	AMH	ENSG00000104899.7
0.0861957	-0.982539	4.40736	-0.222932	0.823589	0.905732	AMHR2	ENSG00000135409.10
207.827	0.258182	0.137031	1.88411	0.0595499	0.113222	AMIGO1	ENSG00000181754.6
17.1559	0.798484	0.525785	1.51865	0.128851	0.220657	AMIGO2	ENSG00000139211.6
0						AMIGO3	ENSG00000176020.8
135.721	-0.509964	0.195025	-2.61486	0.0089264	0.0214389	AMMECR1	ENSG00000101935.9
582.789	-0.24172	0.106525	-2.26915	0.0232591	0.0499109	AMMECR1L	ENSG00000144233.9
119.856	0.218663	0.193982	1.12723	0.259644	0.392631	AMN	ENSG00000166126.10
116.389	-0.742378	0.217311	-3.4162	0.000635005	0.00193178	AMN1	ENSG00000151743.10
83.2292	-1.20703	0.297901	-4.05177	5.08309e-05	0.000186739	AMOT	ENSG00000126016.15
2223.67	-0.137643	0.0612708	-2.24647	0.0246739	0.0526147	AMOTL1	ENSG00000166025.17
194.405	0.328683	0.150348	2.18615	0.0288048	0.0602731	AMOTL2	ENSG00000114019.14
0						AMPD1	ENSG00000116748.21
626.545	-0.681525	0.0834471	-8.16714	3.15782e-16	3.69583e-15	AMPD2	ENSG00000116337.15
108.549	-0.0660262	0.209247	-0.315542	0.75235	0.86192	AMPD3	ENSG00000133805.15
94.7428	0.596277	0.277305	2.15026	0.0315347	0.0652573	AMPH	ENSG00000078053.16
14.8629	1.42791	0.551375	2.58972	0.00960528	0.0228941	AMT	ENSG00000145020.15
0.357405	2.88421	4.30604	0.669806	0.502981	0.653928	AMTN	ENSG00000187689.9
0						AMY1A	ENSG00000237763.9
0						AMY1B	ENSG00000174876.16
0						AMY1C	ENSG00000187733.6
0						AMY2A	ENSG00000243480.7
52.9054	0.39919	0.384649	1.0378	0.299361	0.439769	AMY2B	ENSG00000240038.6
5.06818	3.73953	1.32624	2.81965	0.00480757	0.0123657	AMZ1	ENSG00000174945.13
708.57	0.00642366	0.0940244	0.068319	0.945532	0.996576	AMZ2	ENSG00000196704.11
947.797	-0.0199255	0.066319	-0.300449	0.763835	0.870329	ANAPC1	ENSG00000153107.12
59.5876	0.252733	0.322892	0.782716	0.433794	0.586504	ANAPC10	ENSG00000164162.13
670.268	-0.303384	0.0769919	-3.94046	8.1324e-05	0.000290011	ANAPC11	ENSG00000141552.17
393.344	-0.430428	0.107719	-3.99585	6.44624e-05	0.000233194	ANAPC13	ENSG00000129055.12
52.8377	-1.16415	0.296529	-3.92594	8.63923e-05	0.000306278	ANAPC15	ENSG00000110200.8
462.477	-0.384095	0.100566	-3.81932	0.000133819	0.000459828	ANAPC16	ENSG00000166295.8
580.685	0.846306	0.102436	8.26184	1.43444e-16	1.71701e-15	ANAPC2	ENSG00000176248.8
296.678	0.563667	0.12213	4.61531	3.92501e-06	1.69858e-05	ANAPC4	ENSG00000053900.10
2014.35	0.221357	0.0557675	3.96927	7.20929e-05	0.000259188	ANAPC5	ENSG00000089053.12
983.454	0.0413907	0.0775779	0.533537	0.593662	0.731614	ANAPC7	ENSG00000196510.12
0.498013	0.833957	4.01354	0.207786	0.835396	0.908814	ANG	ENSG00000214274.9
391.465	0.119332	0.114579	1.04148	0.297653	0.437813	ANGEL1	ENSG00000013523.9
422.454	0.0725785	0.119195	0.608907	0.542586	0.688145	ANGEL2	ENSG00000174606.13
0						ANGPT1	ENSG00000154188.9
29.6979	-0.842334	0.397247	-2.12043	0.0339699	0.0695384	ANGPT2	ENSG00000091879.13
1.66068	5.0348	2.18582	2.30339	0.0212569	0.0461362	ANGPT4	ENSG00000101280.7
0.0810746	-0.982539	4.40736	-0.222932	0.823589	0.905732	ANGPTL1	ENSG00000116194.12
133.696	-0.988627	0.202184	-4.88974	1.0097e-06	4.74734e-06	ANGPTL2	ENSG00000136859.9
1.6356	0.0452289	2.20898	0.020475	0.983664	1	ANGPTL3	ENSG00000132855.4
23.2454	3.99502	0.717398	5.56876	2.56562e-08	1.46051e-07	ANGPTL4	ENSG00000167772.11
0.328891	0	4.40736	0	1	1	ANGPTL5	ENSG00000187151.7
3.65165	0.309602	1.22461	0.252816	0.800411	0.899855	ANGPTL6	ENSG00000130812.10
0						ANGPTL7	ENSG00000171819.4
0						ANGPTL8	ENSG00000130173.13
0						ANHX	ENSG00000227059.6
219.762	0.672389	0.140998	4.7688	1.85329e-06	8.41772e-06	ANK1	ENSG00000029534.20
969.817	-0.0851863	0.0685315	-1.24302	0.213859	0.335976	ANK2	ENSG00000145362.17
48.6534	-0.0983941	0.363061	-0.271012	0.786381	0.888737	ANK3	ENSG00000151150.21
23.5599	2.7192	0.489862	5.55096	2.84103e-08	1.61279e-07	ANKAR	ENSG00000151687.14
154.18	0.273253	0.183304	1.49071	0.136038	0.231049	ANKDD1A	ENSG00000166839.16
3.40308	0.62381	1.18479	0.526516	0.598529	0.736204	ANKDD1B	ENSG00000189045.13
90.8245	0.981505	0.238856	4.10919	3.97047e-05	0.000148915	ANKEF1	ENSG00000132623.15
0.292574	0.940967	4.40736	0.213499	0.830938	0.905732	ANKFN1	ENSG00000153930.11
1412.6	0.512159	0.0607756	8.42705	3.54486e-17	4.45222e-16	ANKFY1	ENSG00000185722.17
950.847	-0.0691792	0.0678589	-1.01946	0.307986	0.449968	ANKH	ENSG00000154122.13
87.0818	-0.662469	0.206853	-3.20261	0.00136188	0.00390494	ANKHD1	ENSG00000131503.20
64.1768	0.400828	0.263645	1.52033	0.128428	0.220071	ANKHD1-EIF4EBP3	ENSG00000254996.5
838.935	-0.0523783	0.0761048	-0.688239	0.491302	0.6431	ANKIB1	ENSG00000001629.9
1.05981	0.664929	2.32821	0.285597	0.775187	0.87946	ANKK1	ENSG00000170209.4
76.8268	-0.585257	0.252148	-2.32108	0.0202825	0.0442866	ANKLE1	ENSG00000160117.14
1528.54	0.705899	0.0617242	11.4363	2.75264e-30	7.31422e-29	ANKLE2	ENSG00000176915.14
93.0368	0.049615	0.199908	0.248189	0.803988	0.903006	ANKMY1	ENSG00000144504.15
64.2191	-0.667444	0.269017	-2.48105	0.0130995	0.0301181	ANKMY2	ENSG00000106524.8
145.747	1.05946	0.189585	5.5883	2.29302e-08	1.31496e-07	ANKRA2	ENSG00000164331.9
0.176051	1.86192	4.36601	0.426457	0.669775	0.796128	ANKRD1	ENSG00000148677.6
872.286	0.87533	0.0823883	10.6244	2.294e-26	5.04403e-25	ANKRD10	ENSG00000088448.14
1322.53	-0.0212446	0.0584817	-0.363269	0.716404	0.83089	ANKRD11	ENSG00000167522.15
517.635	0.934943	0.104269	8.96664	3.05707e-19	4.36744e-18	ANKRD12	ENSG00000101745.16
587.586	0.753232	0.102657	7.33736	2.17843e-13	2.03506e-12	ANKRD13A	ENSG00000076513.16
1522.74	-0.586079	0.0680644	-8.61064	7.26518e-18	9.45227e-17	ANKRD13B	ENSG00000198720.12
253.085	0.593642	0.130321	4.55523	5.23275e-06	2.21919e-05	ANKRD13C	ENSG00000118454.12
400.721	1.02374	0.112549	9.09595	9.37673e-20	1.38445e-18	ANKRD13D	ENSG00000172932.14
69.7103	-0.919132	0.289756	-3.17209	0.00151344	0.00430287	ANKRD16	ENSG00000134461.15
1853.5	0.0810601	0.0570753	1.42023	0.15554	0.258258	ANKRD17	ENSG00000132466.18
100.194	1.42868	0.261039	5.47305	4.4235e-08	2.45474e-07	ANKRD18A	ENSG00000180071.19
175.558	0.387133	0.170413	2.27173	0.0231026	0.0496077	ANKRD18B	ENSG00000230453.9
0						ANKRD2	ENSG00000165887.11
0.159003	0.94098	4.40736	0.213502	0.830935	0.905732	ANKRD20A1	ENSG00000260691.5
0.230301	0.940971	4.40736	0.2135	0.830937	0.905732	ANKRD20A2	ENSG00000183148.6
0.0801831	0	4.40736	0	1	1	ANKRD20A3	ENSG00000276203.4
0.161622	1.75345	4.37516	0.400773	0.688587	0.805794	ANKRD20A4	ENSG00000172014.12
0						ANKRD22	ENSG00000152766.5
7.46891	1.1539	0.882269	1.30788	0.190915	0.306241	ANKRD23	ENSG00000163126.14
5.93717	2.13147	0.953424	2.2356	0.0253783	0.0539545	ANKRD24	ENSG00000089847.12
189.275	0.403685	0.158317	2.54984	0.0107771	0.0253977	ANKRD26	ENSG00000107890.16
390.262	-0.815238	0.117271	-6.95176	3.60753e-12	3.06227e-11	ANKRD27	ENSG00000105186.15
811.68	-0.126862	0.085609	-1.48188	0.138373	0.234235	ANKRD28	ENSG00000206560.11
2.93983	-1.01642	1.52637	-0.665904	0.505473	0.656382	ANKRD29	ENSG00000154065.16
0						ANKRD30A	ENSG00000148513.17
0						ANKRD30B	ENSG00000180777.13
0						ANKRD30BL	ENSG00000163046.15
18.8092	1.93337	0.573082	3.37364	0.000741814	0.00222353	ANKRD31	ENSG00000145700.9
0						ANKRD33	ENSG00000167612.12
6.79209	4.46289	1.30187	3.42805	0.000607939	0.00185775	ANKRD33B	ENSG00000164236.11
40.9551	-0.370917	0.301959	-1.22837	0.219309	0.342559	ANKRD34A	ENSG00000272031.2
2.01396	0.324714	1.76883	0.183575	0.854347	0.923641	ANKRD34B	ENSG00000189127.7
1.35347	-0.84116	2.35197	-0.357641	0.720612	0.834524	ANKRD34C	ENSG00000235711.4
0						ANKRD35	ENSG00000198483.12
110.834	0.148214	0.223461	0.663267	0.50716	0.657475	ANKRD36	ENSG00000135976.18
41.3372	0.16336	0.317743	0.514127	0.607163	0.744634	ANKRD36B	ENSG00000196912.12
97.6703	0.814411	0.215505	3.77907	0.000157412	0.000533704	ANKRD36C	ENSG00000174501.14
74.3087	0.118485	0.280748	0.422034	0.673	0.798197	ANKRD37	ENSG00000186352.8
112.659	-0.0468929	0.226018	-0.207474	0.83564	0.908958	ANKRD39	ENSG00000213337.8
772.677	-0.317674	0.0892113	-3.56091	0.000369565	0.00117464	ANKRD40	ENSG00000154945.6
0						ANKRD40CL	ENSG00000167117.9
46.4099	0.674839	0.347772	1.94046	0.0523232	0.101276	ANKRD42	ENSG00000137494.13
228.416	-0.475769	0.146086	-3.25676	0.0011269	0.0032755	ANKRD44	ENSG00000065413.19
5.32535	-0.257248	0.981615	-0.262066	0.793271	0.894169	ANKRD45	ENSG00000183831.6
416.628	0.24634	0.110624	2.22682	0.0259592	0.0550532	ANKRD46	ENSG00000186106.11
99.3926	-0.744155	0.212408	-3.50342	0.00045932	0.0014356	ANKRD49	ENSG00000168876.8
1081.21	-0.357972	0.083205	-4.30229	1.69042e-05	6.68426e-05	ANKRD50	ENSG00000151458.11
1106.74	-0.381186	0.0793553	-4.80354	1.55887e-06	7.14809e-06	ANKRD52	ENSG00000139645.9
3.00198	4.28157	1.70572	2.51013	0.0120687	0.0280313	ANKRD53	ENSG00000144031.11
391.339	0.458116	0.0986032	4.64605	3.38347e-06	1.47755e-05	ANKRD54	ENSG00000100124.14
0.814632	-1.86037	3.58541	-0.518871	0.603851	0.741631	ANKRD55	ENSG00000164512.17
149.635	0.587465	0.184276	3.18796	0.0014328	0.0040896	ANKRD6	ENSG00000135299.16
0						ANKRD60	ENSG00000124227.5
3.96238	2.03415	1.22326	1.66289	0.0963338	0.172485	ANKRD61	ENSG00000157999.5
12.5982	0.682836	0.69002	0.989589	0.322375	0.466396	ANKRD62	ENSG00000181626.11
0.552714	-2.94903	4.09012	-0.721014	0.470901	0.623549	ANKRD63	ENSG00000230778.1
1.01796	3.57619	2.91848	1.22536	0.220439	0.34383	ANKRD65	ENSG00000235098.8
0						ANKRD66	ENSG00000230062.5
3.2849	-0.488576	1.4422	-0.338771	0.734782	0.847566	ANKRD7	ENSG00000106013.14
253.602	-0.244135	0.128042	-1.90667	0.0565628	0.108274	ANKRD9	ENSG00000156381.8
597.678	0.188413	0.0925314	2.03621	0.0417298	0.0832198	ANKS1A	ENSG00000064999.14
26.3335	-0.215637	0.470852	-0.457972	0.646972	0.779914	ANKS1B	ENSG00000185046.18
300.886	0.609239	0.130653	4.66304	3.11569e-06	1.36904e-05	ANKS3	ENSG00000168096.14
0.19048	1.9644	4.35796	0.450761	0.652162	0.781729	ANKS4B	ENSG00000175311.6
398.764	-0.768937	0.113727	-6.76124	1.36812e-11	1.09847e-10	ANKS6	ENSG00000165138.17
0.285719	2.55402	4.32108	0.591062	0.554479	0.698833	ANKUB1	ENSG00000206199.10
454.315	0.0719842	0.123433	0.583185	0.559769	0.703484	ANKZF1	ENSG00000163516.13
1101.69	-0.116533	0.0852051	-1.36767	0.171414	0.279802	ANLN	ENSG00000011426.10
2.13274	1.00856	1.82434	0.552837	0.580375	0.722921	ANO1	ENSG00000131620.17
217.424	0.147111	0.171135	0.859619	0.389999	0.540368	ANO10	ENSG00000160746.12
0.380618	0	4.40736	0	1	1	ANO2	ENSG00000047617.14
1.6012	2.15337	2.15972	0.997057	0.318737	0.462404	ANO3	ENSG00000134343.12
4.70629	1.23195	1.18677	1.03807	0.299236	0.439664	ANO4	ENSG00000151572.17
191.271	-1.01866	0.164325	-6.19904	5.68098e-10	3.90307e-09	ANO5	ENSG00000171714.11
1635.09	0.0408039	0.0632811	0.644804	0.519054	0.667642	ANO6	ENSG00000177119.15
13.1056	-0.704899	0.608297	-1.15881	0.246534	0.376505	ANO7	ENSG00000146205.13
569.608	0.0569087	0.0956533	0.594947	0.551879	0.697274	ANO8	ENSG00000074855.10
0.0918546	0	4.40736	0	1	1	ANO9	ENSG00000185101.12
23.0246	0.588367	0.43365	1.35678	0.174851	0.28453	ANOS1	ENSG00000011201.11
1820.73	-1.28453	0.0782529	-16.4151	1.49041e-60	1.46482e-58	ANP32A	ENSG00000140350.15
1424.94	-1.35306	0.0729978	-18.5356	1.06607e-76	1.6724e-74	ANP32B	ENSG00000136938.8
0						ANP32D	ENSG00000139223.2
848.354	-2.24452	0.0807993	-27.7789	7.80203e-170	1.2729e-166	ANP32E	ENSG00000143401.14
38.9115	1.97608	0.426991	4.62792	3.69364e-06	1.60484e-05	ANPEP	ENSG00000166825.13
726.676	0.396488	0.0960392	4.1284	3.65297e-05	0.000137927	ANTXR1	ENSG00000169604.19
209.212	0.859617	0.174696	4.92063	8.62642e-07	4.09724e-06	ANTXR2	ENSG00000163297.16
0						ANTXRL	ENSG00000274209.4
4.82962	5.13626	1.54758	3.31889	0.000903748	0.0026721	ANXA1	ENSG00000135046.13
0						ANXA10	ENSG00000109511.11
458.057	-0.101479	0.108164	-0.938195	0.348144	0.495116	ANXA11	ENSG00000122359.17
0						ANXA13	ENSG00000104537.16
231.07	0.25178	0.139792	1.8011	0.0716869	0.133406	ANXA2	ENSG00000182718.16
4.18963	3.11792	1.45555	2.14208	0.0321867	0.0664464	ANXA2R	ENSG00000177721.4
0.911796	4.10396	3.18132	1.29002	0.197044	0.314158	ANXA3	ENSG00000138772.12
56.9589	1.13665	0.287945	3.94746	7.89839e-05	0.000282283	ANXA4	ENSG00000196975.15
944.305	0.0602336	0.0726006	0.829657	0.406733	0.558432	ANXA5	ENSG00000164111.14
1055.27	-0.728162	0.0769081	-9.46794	2.85405e-21	4.6471e-20	ANXA6	ENSG00000197043.13
251.623	-0.311849	0.134563	-2.3175	0.0204768	0.0446271	ANXA7	ENSG00000138279.15
0						ANXA8	ENSG00000265190.6
0						ANXA8L1	ENSG00000264230.8
3.44886	0.405528	2.72774	0.148668	0.881815	0.945506	ANXA9	ENSG00000143412.9
0.0952398	0.940989	4.40736	0.213504	0.830934	0.905732	AOAH	ENSG00000136250.11
0.181436	-0.020761	4.40736	-0.00471053	0.996242	1	AOC1	ENSG00000002726.20
10.516	3.00947	0.797512	3.77358	0.000160924	0.000544705	AOC2	ENSG00000131480.8
11.1161	2.76717	1.40769	1.96576	0.0493262	0.0961479	AOC3	ENSG00000131471.6
135.173	-0.496873	0.189321	-2.6245	0.00867773	0.0208785	AOX1	ENSG00000138356.13
0						AP000275.2	ENSG00000265590.9
1.65264	4.32627	2.18546	1.97957	0.0477522	0.0934948	AP000295.1	ENSG00000249624.9
0						AP000311.1	ENSG00000249209.2
0						AP000350.4	ENSG00000251357.4
4.12174	-0.192643	1.14008	-0.168972	0.865818	0.932325	AP000646.1	ENSG00000285509.1
0						AP000721.1	ENSG00000256100.1
0.400916	0	4.40736	0	1	1	AP000781.2	ENSG00000254979.5
0						AP000812.4	ENSG00000284844.1
0						AP000812.5	ENSG00000284922.1
3.80472	0.145014	1.12879	0.128469	0.897778	0.958113	AP000944.2	ENSG00000285816.1
0.250388	2.37789	4.3306	0.54909	0.582943	0.723968	AP001267.5	ENSG00000285827.1
0						AP001273.2	ENSG00000284057.1
0						AP001458.2	ENSG00000255432.1
0						AP001781.2	ENSG00000258529.5
0						AP001931.1	ENSG00000254732.1
0.369182	2.92844	4.30427	0.680358	0.496278	0.647843	AP002373.1	ENSG00000255663.1
8.78898	-0.872333	0.78566	-1.11032	0.266861	0.400826	AP002495.1	ENSG00000254469.7
0						AP002512.3	ENSG00000284732.1
0						AP002748.4	ENSG00000256349.1
1.05856	3.1075	3.10227	1.00169	0.316495	0.459846	AP002884.3	ENSG00000255292.8
54.1714	-1.0149	0.311981	-3.25308	0.00114163	0.00331478	AP002990.1	ENSG00000255508.7
10.5764	2.78628	0.783179	3.55765	0.000374183	0.00118817	AP003071.5	ENSG00000284713.1
10.5603	1.96135	0.751787	2.60891	0.009083	0.0217861	AP003108.2	ENSG00000256591.5
0						AP003419.1	ENSG00000256514.1
193.795	-0.00612341	0.158183	-0.038711	0.969121	1	AP1AR	ENSG00000138660.11
1118.1	0.179492	0.0798208	2.24868	0.0245327	0.0523526	AP1B1	ENSG00000100280.16
1103.57	0.0854479	0.0688524	1.24103	0.214594	0.336807	AP1G1	ENSG00000166747.12
278.609	0.958576	0.143924	6.6603	2.7327e-11	2.13935e-10	AP1G2	ENSG00000213983.11
901.252	0.22636	0.0803012	2.81889	0.00481901	0.0123892	AP1M1	ENSG00000072958.8
3.93305	-1.08157	1.33165	-0.812202	0.416676	0.569019	AP1M2	ENSG00000129354.11
412.396	0.101927	0.120104	0.848659	0.396071	0.546738	AP1S1	ENSG00000106367.14
828.8	-0.136138	0.0738109	-1.84442	0.0651223	0.122531	AP1S2	ENSG00000182287.14
22.6344	-0.528515	0.420615	-1.25653	0.208925	0.329716	AP1S3	ENSG00000152056.16
1096.91	0.37578	0.0738707	5.087	3.63779e-07	1.80782e-06	AP2A1	ENSG00000196961.12
168.622	0.555868	0.224304	2.47819	0.0132051	0.0303311	AP2A2	ENSG00000183020.13
4108.16	-0.17198	0.0571687	-3.00829	0.00262719	0.00711648	AP2B1	ENSG00000006125.17
1662.24	0.00673714	0.0702291	0.0959309	0.923575	0.978409	AP2M1	ENSG00000161203.13
250.095	-0.763961	0.150055	-5.09121	3.55778e-07	1.77075e-06	AP2S1	ENSG00000042753.11
414.597	-0.32368	0.115462	-2.80334	0.00505763	0.0129011	AP3B1	ENSG00000132842.13
1293.36	0.38737	0.0782099	4.95296	7.30934e-07	3.4961e-06	AP3B2	ENSG00000103723.13
2173.21	0.367622	0.0602814	6.09843	1.07114e-09	7.20053e-09	AP3D1	ENSG00000065000.17
1006.85	-0.585089	0.0854627	-6.84613	7.58735e-12	6.23615e-11	AP3M1	ENSG00000185009.12
461.628	-0.326182	0.0991614	-3.2894	0.001004	0.00294397	AP3M2	ENSG00000070718.11
341.642	-0.39555	0.116123	-3.40631	0.000658477	0.00199722	AP3S1	ENSG00000177879.15
414.313	0.276921	0.111725	2.47858	0.0131905	0.0303061	AP3S2	ENSG00000157823.16
204.501	-0.865148	0.163318	-5.29733	1.17509e-07	6.1864e-07	AP4B1	ENSG00000134262.12
289.422	0.315665	0.13499	2.33843	0.0193649	0.0425335	AP4E1	ENSG00000081014.10
384.037	0.248437	0.119442	2.07999	0.0375263	0.0758193	AP4M1	ENSG00000221838.9
82.0912	0.559697	0.24949	2.24336	0.0248734	0.0530054	AP4S1	ENSG00000100478.14
105.249	1.05653	0.206313	5.12101	3.0391e-07	1.52375e-06	AP5B1	ENSG00000254470.2
466.002	0.371875	0.103083	3.60752	0.000309132	0.000997131	AP5M1	ENSG00000053770.11
54.4666	-0.0728021	0.303864	-0.239587	0.81065	0.905732	AP5S1	ENSG00000125843.10
323.027	0.976168	0.131984	7.3961	1.40242e-13	1.33804e-12	AP5Z1	ENSG00000242802.7
424.262	0.182791	0.119542	1.52909	0.126242	0.216942	APAF1	ENSG00000120868.13
76.0799	1.20303	0.287113	4.19009	2.78846e-05	0.000106868	APBA1	ENSG00000107282.7
194.271	-0.751029	0.358115	-2.09717	0.0359782	0.0730716	APBA2	ENSG00000034053.14
227.09	0.348007	0.165698	2.10025	0.035707	0.072575	APBA3	ENSG00000011132.11
971.552	0.0514988	0.0839645	0.61334	0.539652	0.685369	APBB1	ENSG00000166313.18
0						APBB1IP	ENSG00000077420.15
461.524	-0.778514	0.13607	-5.72143	1.05628e-08	6.32878e-08	APBB2	ENSG00000163697.16
412.378	0.695364	0.108855	6.38797	1.68105e-10	1.22398e-09	APBB3	ENSG00000113108.19
1044.83	0.25073	0.0718671	3.4888	0.000485185	0.00151065	APC	ENSG00000134982.16
1999.34	0.310292	0.0558032	5.56046	2.69061e-08	1.53006e-07	APC2	ENSG00000115266.11
19.4724	0.265926	0.425155	0.625482	0.531655	0.677599	APCDD1	ENSG00000154856.12
3.46041	5.08579	1.7778	2.86072	0.0042268	0.0110002	APCDD1L	ENSG00000198768.10
0						APCS	ENSG00000132703.3
761.831	-0.144682	0.0866413	-1.66989	0.0949404	0.17042	APEH	ENSG00000164062.12
0						APELA	ENSG00000248329.5
1605.31	-0.925092	0.0711637	-12.9995	1.23154e-38	4.8533e-37	APEX1	ENSG00000100823.11
215.969	-0.176957	0.178858	-0.989372	0.322481	0.466508	APEX2	ENSG00000169188.4
992.708	-0.422897	0.0905068	-4.67255	2.9749e-06	1.31035e-05	APH1A	ENSG00000117362.12
192.428	0.610526	0.164213	3.71789	0.000200891	0.000670938	APH1B	ENSG00000138613.13
1094.27	0.23849	0.0657851	3.62529	0.000288643	0.000938276	API5	ENSG00000166181.12
175.115	-0.225263	0.164729	-1.36748	0.171476	0.279875	APIP	ENSG00000149089.12
23.2779	-0.499627	0.441371	-1.13199	0.257639	0.389961	APLF	ENSG00000169621.9
18.0944	-0.851542	0.574377	-1.48255	0.138194	0.234029	APLN	ENSG00000171388.11
6.76594	1.56895	1.01082	1.55216	0.120625	0.208895	APLNR	ENSG00000134817.10
2252.89	0.364248	0.0623449	5.84247	5.14325e-09	3.19422e-08	APLP1	ENSG00000105290.11
3087.44	0.632219	0.0582677	10.8503	1.98875e-27	4.55071e-26	APLP2	ENSG00000084234.17
991.69	0.19786	0.0833438	2.37402	0.0175956	0.0390787	APMAP	ENSG00000101474.11
0.147903	0	4.40736	0	1	1	APOA1	ENSG00000118137.9
0						APOA2	ENSG00000158874.11
0						APOA4	ENSG00000110244.6
1.05325	-0.225411	3.03046	-0.0743817	0.940707	0.992475	APOA5	ENSG00000110243.11
1.88733	2.2325	2.02518	1.10237	0.270301	0.404992	APOB	ENSG00000084674.14
0						APOBEC1	ENSG00000111701.6
0.33385	2.79199	4.3099	0.647809	0.517109	0.665568	APOBEC2	ENSG00000124701.5
0						APOBEC3A	ENSG00000128383.12
0.253477	1.75344	4.37516	0.400771	0.688589	0.805794	APOBEC3B	ENSG00000179750.15
6.25004	3.00761	1.07071	2.80898	0.00496981	0.0127146	APOBEC3C	ENSG00000244509.3
0.777085	-2.83699	3.31198	-0.856583	0.391675	0.542368	APOBEC3D	ENSG00000243811.9
7.61264	3.91953	1.1821	3.31574	0.000914004	0.00269998	APOBEC3F	ENSG00000128394.16
7.26338	2.03595	0.995089	2.04599	0.0407571	0.0814968	APOBEC3G	ENSG00000239713.8
0						APOBEC3H	ENSG00000100298.15
0.0657782	0	4.40736	0	1	1	APOBEC4	ENSG00000173627.7
1.8364	0	3.91365	0	1	1	APOBR	ENSG00000184730.10
3.81633	6.00154	1.57993	3.79861	0.000145508	0.000496023	APOC1	ENSG00000130208.9
0						APOC2	ENSG00000234906.9
0						APOC3	ENSG00000110245.11
0						APOC4	ENSG00000267467.3
0						APOC4-APOC2	ENSG00000224916.9
0.080811	0.940989	4.40736	0.213504	0.830934	0.905732	APOD	ENSG00000189058.8
10.8763	2.7663	0.818228	3.38084	0.000722643	0.00217006	APOE	ENSG00000130203.9
0						APOF	ENSG00000175336.9
0						APOH	ENSG00000091583.10
0						APOL1	ENSG00000100342.20
115.292	0.677411	0.199513	3.39532	0.000685491	0.00207078	APOL2	ENSG00000128335.13
0.0657782	0	4.40736	0	1	1	APOL3	ENSG00000128284.19
1.09437	-3.85783	3.04599	-1.26653	0.205324	0.324743	APOL4	ENSG00000100336.17
0						APOL5	ENSG00000128313.2
0.49329	2.74826	4.31182	0.637377	0.523879	0.670729	APOL6	ENSG00000221963.5
264.563	3.18293	0.276294	11.5201	1.04523e-30	2.8327e-29	APOLD1	ENSG00000178878.12
0.158375	0	4.40736	0	1	1	APOM	ENSG00000204444.10
66.3344	-1.96057	0.271378	-7.22449	5.02986e-13	4.56662e-12	APOO	ENSG00000184831.13
311.959	0.202092	0.140438	1.43901	0.150148	0.250759	APOOL	ENSG00000155008.13
133.301	0.79044	0.222551	3.55173	0.00038271	0.00121194	APOPT1	ENSG00000256053.7
4892.18	-0.31398	0.0481875	-6.5158	7.23052e-11	5.44626e-10	APP	ENSG00000142192.20
912.879	0.190591	0.0900986	2.11536	0.0343993	0.0703201	APPBP2	ENSG00000062725.9
731.994	-0.428843	0.166472	-2.57607	0.00999294	0.0237245	APPL1	ENSG00000157500.11
325.399	0.0546483	0.12561	0.435062	0.663517	0.791901	APPL2	ENSG00000136044.11
160.566	-0.457781	0.170711	-2.68161	0.00732695	0.0179354	APRT	ENSG00000198931.10
259.808	0.125912	0.141063	0.892593	0.372075	0.521954	APTX	ENSG00000137074.18
6.09806	1.2876	1.04789	1.22875	0.219165	0.342436	AQP1	ENSG00000240583.11
32.2822	-0.769909	0.375958	-2.04786	0.040574	0.0812027	AQP10	ENSG00000143595.12
23.0958	0.0315828	0.489323	0.0645439	0.948537	0.998927	AQP11	ENSG00000178301.3
0						AQP12A	ENSG00000184945.13
0						AQP12B	ENSG00000185176.12
0.418767	-1.85901	4.36968	-0.425435	0.67052	0.796128	AQP2	ENSG00000167580.7
111.748	4.87987	0.352014	13.8627	1.06587e-43	5.3672e-42	AQP3	ENSG00000165272.15
1.66247	4.09048	2.39524	1.70776	0.0876815	0.159018	AQP4	ENSG00000171885.14
55.0729	1.40815	0.402434	3.49908	0.00046686	0.00145721	AQP5	ENSG00000161798.6
20.8627	0.205519	0.54474	0.377279	0.705966	0.821002	AQP6	ENSG00000086159.12
0.311112	1.75343	4.37516	0.400769	0.68859	0.805794	AQP7	ENSG00000165269.12
0						AQP8	ENSG00000103375.10
0						AQP9	ENSG00000103569.9
1203.76	0.139328	0.0701033	1.98746	0.0468711	0.0919456	AQR	ENSG00000021776.10
0.367419	0	4.40736	0	1	1	AR	ENSG00000169083.16
200.888	-0.721651	0.139587	-5.16989	2.3423e-07	1.18753e-06	ARAF	ENSG00000078061.12
891.216	1.20377	0.0884094	13.6158	3.22397e-42	1.52461e-40	ARAP1	ENSG00000186635.14
1.75492	1.72189	1.95324	0.881558	0.378016	0.527934	ARAP2	ENSG00000047365.11
5.38921	0.668173	1.07571	0.621148	0.534503	0.680272	ARAP3	ENSG00000120318.15
306.643	0.609248	0.124693	4.886	1.02903e-06	4.83618e-06	ARC	ENSG00000198576.3
1361.44	-0.0431794	0.0614431	-0.702754	0.482209	0.634302	ARCN1	ENSG00000095139.13
2.3524	3.79433	1.94276	1.95306	0.0508127	0.0987151	AREG	ENSG00000109321.10
865.967	0.255479	0.0917393	2.78484	0.00535543	0.0135547	AREL1	ENSG00000119682.16
3092.8	-0.126407	0.0633827	-1.99434	0.0461146	0.0906894	ARF1	ENSG00000143761.15
1252.19	0.362824	0.0725883	4.99838	5.78136e-07	2.80389e-06	ARF3	ENSG00000134287.9
1434.67	-0.198393	0.0599093	-3.31156	0.000927772	0.00273866	ARF4	ENSG00000168374.10
876.103	0.0320772	0.0766089	0.418714	0.675425	0.800026	ARF5	ENSG00000004059.10
698.303	-0.283768	0.084446	-3.36035	0.000778431	0.00232262	ARF6	ENSG00000165527.6
1218.42	1.04272	0.0731941	14.246	4.74683e-46	2.60756e-44	ARFGAP1	ENSG00000101199.12
659.387	-0.110406	0.0898525	-1.22874	0.219167	0.342436	ARFGAP2	ENSG00000149182.14
327.376	0.318207	0.121649	2.61579	0.00890224	0.0213871	ARFGAP3	ENSG00000242247.10
729.457	0.26715	0.092033	2.90276	0.00369891	0.00973664	ARFGEF1	ENSG00000066777.8
640.775	0.551871	0.0965831	5.71396	1.10379e-08	6.60131e-08	ARFGEF2	ENSG00000124198.8
0.566766	2.55249	4.04865	0.630455	0.528397	0.674607	ARFGEF3	ENSG00000112379.8
342.375	0.450718	0.110495	4.0791	4.52099e-05	0.000168018	ARFIP1	ENSG00000164144.15
445.04	0.399249	0.109436	3.64823	0.000264052	0.000863154	ARFIP2	ENSG00000132254.12
566.024	1.0734	0.0850764	12.6169	1.70505e-36	6.00819e-35	ARFRP1	ENSG00000101246.19
0.161622	1.75345	4.37516	0.400773	0.688587	0.805794	ARG1	ENSG00000118520.14
124.725	-0.325007	0.197428	-1.6462	0.0997225	0.177617	ARG2	ENSG00000081181.7
0						ARGFX	ENSG00000186103.3
1834	-0.659827	0.071799	-9.18992	3.93127e-20	5.96639e-19	ARGLU1	ENSG00000134884.14
358.502	-0.0394963	0.110965	-0.355936	0.721888	0.835766	ARHGAP1	ENSG00000175220.11
78.9053	-0.580602	0.247332	-2.34746	0.018902	0.0416626	ARHGAP10	ENSG00000071205.11
84.6437	-0.449691	0.213932	-2.10203	0.0355507	0.0722934	ARHGAP11A	ENSG00000198826.10
0.131556	0	4.40736	0	1	1	ARHGAP11B	ENSG00000285077.1
403.555	-0.182703	0.103728	-1.76136	0.0781772	0.143811	ARHGAP12	ENSG00000165322.17
257.518	-0.483144	0.143743	-3.36117	0.00077612	0.00231615	ARHGAP15	ENSG00000075884.13
570.016	0.121014	0.0887332	1.3638	0.17263	0.281477	ARHGAP17	ENSG00000140750.16
14.5471	1.25689	0.568024	2.21273	0.026916	0.0567725	ARHGAP18	ENSG00000146376.10
317.747	-0.575881	0.154694	-3.72272	0.000197084	0.0006589	ARHGAP19	ENSG00000213390.10
20.7675	-0.343297	0.532292	-0.64494	0.518966	0.667581	ARHGAP19-SLIT1	ENSG00000269891.2
1.95513	1.50185	2.04264	0.735251	0.462186	0.615255	ARHGAP20	ENSG00000137727.12
694.813	-0.21089	0.0849564	-2.48234	0.0130524	0.0300352	ARHGAP21	ENSG00000107863.17
61.5617	-0.246218	0.262241	-0.9389	0.347782	0.494688	ARHGAP22	ENSG00000128805.14
43.3689	0.609152	0.393933	1.54634	0.122024	0.210802	ARHGAP23	ENSG00000275832.4
125.257	-0.423475	0.207259	-2.04321	0.0410313	0.081967	ARHGAP24	ENSG00000138639.17
2.71805	0.987931	1.29772	0.761282	0.446489	0.599298	ARHGAP25	ENSG00000163219.11
448.279	1.92754	0.135167	14.2604	3.86216e-46	2.12875e-44	ARHGAP26	ENSG00000145819.16
0.269905	-0.982559	4.40736	-0.222936	0.823585	0.905732	ARHGAP27	ENSG00000159314.11
307.536	0.197461	0.133086	1.48371	0.137885	0.233675	ARHGAP28	ENSG00000088756.12
22.2618	1.40931	0.503161	2.8009	0.00509596	0.0129846	ARHGAP29	ENSG00000137962.12
13.6145	3.81353	0.863133	4.41825	9.95046e-06	4.05753e-05	ARHGAP30	ENSG00000186517.13
210.005	0.838584	0.167045	5.0201	5.16449e-07	2.52347e-06	ARHGAP31	ENSG00000031081.10
503.623	-0.21698	0.11003	-1.97202	0.0486078	0.0948948	ARHGAP32	ENSG00000134909.18
680.391	-0.396936	0.0845253	-4.69607	2.65219e-06	1.17647e-05	ARHGAP33	ENSG00000004777.18
2152.13	-0.267324	0.0566454	-4.71925	2.36718e-06	1.05781e-05	ARHGAP35	ENSG00000160007.18
85.2656	1.92677	0.228549	8.43046	3.44297e-17	4.33093e-16	ARHGAP36	ENSG00000147256.11
305.366	-0.167292	0.143001	-1.16987	0.242053	0.370946	ARHGAP39	ENSG00000147799.11
26.7092	0.951341	0.414572	2.29476	0.0217471	0.0470875	ARHGAP4	ENSG00000089820.15
0						ARHGAP40	ENSG00000124143.10
155.377	1.89113	0.189975	9.95464	2.40692e-23	4.47255e-22	ARHGAP42	ENSG00000165895.18
6.29344	2.79489	1.35106	2.06867	0.0385773	0.0776256	ARHGAP44	ENSG00000006740.16
57.2539	2.12023	0.295615	7.17226	7.377e-13	6.60933e-12	ARHGAP45	ENSG00000180448.10
277.327	0.607571	0.136315	4.45711	8.30707e-06	3.42074e-05	ARHGAP5	ENSG00000100852.12
0.894305	0.512538	3.03403	0.16893	0.865852	0.932325	ARHGAP6	ENSG00000047648.21
1.53372	3.37009	2.24514	1.50106	0.13334	0.227082	ARHGAP8	ENSG00000241484.9
5.35409	3.60424	1.47384	2.44547	0.0144662	0.0329264	ARHGAP9	ENSG00000123329.17
3420.44	-0.689619	0.0542086	-12.7216	4.48736e-37	1.64151e-35	ARHGDIA	ENSG00000141522.11
3.75547	4.35165	1.64093	2.65195	0.00800286	0.0194209	ARHGDIB	ENSG00000111348.8
198.079	0.177167	0.161143	1.09944	0.271577	0.406456	ARHGDIG	ENSG00000242173.8
686.294	0.724863	0.0862123	8.40788	4.17473e-17	5.21522e-16	ARHGEF1	ENSG00000076928.17
0.641465	0	4.40736	0	1	1	ARHGEF10	ENSG00000104728.15
194.982	-0.0230102	0.156467	-0.147061	0.883084	0.946555	ARHGEF10L	ENSG00000074964.16
707.158	0.195427	0.0798628	2.44704	0.0144036	0.0328066	ARHGEF11	ENSG00000132694.18
2018.98	0.201447	0.0586768	3.43315	0.000596603	0.00182653	ARHGEF12	ENSG00000196914.8
0						ARHGEF15	ENSG00000198844.11
1.58051	2.49786	2.05668	1.21451	0.224553	0.349113	ARHGEF16	ENSG00000130762.14
709.149	-0.555102	0.0931546	-5.95893	2.53894e-09	1.64115e-08	ARHGEF17	ENSG00000110237.4
102.217	0.430513	0.226816	1.89807	0.057687	0.110091	ARHGEF18	ENSG00000104880.17
50.2981	0.381599	0.306108	1.24662	0.212539	0.33425	ARHGEF19	ENSG00000142632.16
549.907	0.111414	0.0961263	1.15903	0.246443	0.376443	ARHGEF2	ENSG00000116584.17
494.1	0.244182	0.0949213	2.57246	0.0100977	0.0239455	ARHGEF25	ENSG00000240771.6
0.387512	0	4.40736	0	1	1	ARHGEF26	ENSG00000114790.12
10.1289	3.05786	0.821312	3.72314	0.000196764	0.000657964	ARHGEF28	ENSG00000214944.9
85.5991	0.369688	0.27173	1.3605	0.173672	0.282866	ARHGEF3	ENSG00000163947.11
14.706	1.77356	1.20408	1.47296	0.140763	0.237639	ARHGEF33	ENSG00000214694.11
0.15687	0	4.40736	0	1	1	ARHGEF35	ENSG00000213214.4
57.1158	0.852855	0.309358	2.75685	0.00583605	0.0146552	ARHGEF37	ENSG00000183111.11
0.0918546	0	4.40736	0	1	1	ARHGEF38	ENSG00000236699.8
326.717	0.903456	0.132532	6.8169	9.30289e-12	7.59643e-11	ARHGEF39	ENSG00000137135.17
319.098	0.0105778	0.127484	0.0829737	0.933872	0.98718	ARHGEF4	ENSG00000136002.18
636.913	0.254728	0.107957	2.35952	0.0182986	0.0404583	ARHGEF40	ENSG00000165801.9
0.161018	0.94098	4.40736	0.213502	0.830935	0.905732	ARHGEF5	ENSG00000050327.14
166.747	1.74886	0.214059	8.16999	3.08415e-16	3.61479e-15	ARHGEF6	ENSG00000129675.15
857.336	0.0938804	0.08941	1.05	0.293719	0.432962	ARHGEF7	ENSG00000102606.18
592.853	0.0247199	0.0945005	0.261585	0.793641	0.894464	ARHGEF9	ENSG00000131089.15
956.739	0.594021	0.085202	6.97191	3.1266e-12	2.67071e-11	ARID1A	ENSG00000117713.19
886.785	0.00193389	0.0667484	0.0289729	0.976886	1	ARID1B	ENSG00000049618.23
722.599	-0.222219	0.107369	-2.06967	0.0384837	0.077485	ARID2	ENSG00000189079.15
190.076	0.192453	0.150437	1.2793	0.200793	0.318919	ARID3A	ENSG00000116017.10
221.307	0.0791688	0.178531	0.443445	0.657444	0.786699	ARID3B	ENSG00000179361.17
0.65225	3.75098	4.05637	0.924713	0.355115	0.502708	ARID3C	ENSG00000205143.2
271.644	0.327855	0.134676	2.4344	0.0149164	0.0338567	ARID4A	ENSG00000032219.18
583.83	0.478762	0.109274	4.38129	1.17978e-05	4.75263e-05	ARID4B	ENSG00000054267.21
60.1633	0.0531033	0.276006	0.192399	0.847429	0.918292	ARID5A	ENSG00000196843.15
244.236	0.447121	0.141456	3.16085	0.00157312	0.00446023	ARID5B	ENSG00000150347.15
692.377	-0.424763	0.0925964	-4.58725	4.49117e-06	1.9242e-05	ARIH1	ENSG00000166233.14
1029.38	0.191126	0.0817079	2.33914	0.0193281	0.042464	ARIH2	ENSG00000177479.19
22.0546	0.419444	0.486888	0.86148	0.388974	0.539452	ARIH2OS	ENSG00000221883.3
314.382	-0.190517	0.128273	-1.48525	0.137478	0.233083	ARL1	ENSG00000120805.13
1099.16	-0.843184	0.0796345	-10.5882	3.38104e-26	7.38443e-25	ARL10	ENSG00000175414.6
0						ARL11	ENSG00000152213.3
0						ARL13A	ENSG00000174225.14
151.632	0.0618723	0.189543	0.326429	0.7441	0.855592	ARL13B	ENSG00000169379.15
0.161622	1.75345	4.37516	0.400773	0.688587	0.805794	ARL14	ENSG00000179674.3
289.38	-0.0915712	0.132612	-0.690521	0.489867	0.641633	ARL14EP	ENSG00000152219.4
0.308211	2.33503	4.33309	0.538884	0.589967	0.72815	ARL14EPL	ENSG00000268223.5
134.184	-0.236309	0.212519	-1.11194	0.266163	0.400005	ARL15	ENSG00000185305.10
359.764	0.77422	0.13817	5.6034	2.10191e-08	1.21133e-07	ARL16	ENSG00000214087.8
1.8788	2.8136	2.09502	1.34299	0.179274	0.290164	ARL17A	ENSG00000185829.17
0.763174	-3.64208	3.20082	-1.13786	0.255179	0.386774	ARL17B	ENSG00000228696.8
241.256	-1.52108	0.14851	-10.2422	1.28224e-24	2.57633e-23	ARL2	ENSG00000213465.7
0						ARL2-SNX15	ENSG00000273003.1
367.86	0.0916878	0.120668	0.759832	0.447355	0.600048	ARL2BP	ENSG00000102931.7
414.247	-0.423697	0.106643	-3.97305	7.09591e-05	0.00025545	ARL3	ENSG00000138175.8
114.998	-0.235623	0.258651	-0.910968	0.362312	0.510812	ARL4A	ENSG00000122644.12
513.634	-0.264215	0.109587	-2.41101	0.0159084	0.03575	ARL4C	ENSG00000188042.7
96.4465	0.372909	0.281024	1.32696	0.184521	0.297652	ARL4D	ENSG00000175906.4
319.177	-0.0953531	0.125587	-0.759257	0.447699	0.60033	ARL5A	ENSG00000162980.16
828.032	-0.118807	0.0912984	-1.3013	0.193155	0.309256	ARL5B	ENSG00000165997.4
19.898	3.02312	0.634683	4.7632	1.90546e-06	8.64263e-06	ARL5C	ENSG00000141748.12
887.546	0.115992	0.0861244	1.3468	0.178046	0.288634	ARL6	ENSG00000113966.9
4318.6	0.506836	0.0516623	9.81055	1.01412e-22	1.79646e-21	ARL6IP1	ENSG00000170540.14
30.8895	-0.0711201	0.42703	-0.166546	0.867727	0.933837	ARL6IP4	ENSG00000182196.13
782.846	0.290964	0.0705509	4.12417	3.72071e-05	0.00014029	ARL6IP5	ENSG00000144746.6
523.052	-0.496939	0.0936637	-5.30556	1.12327e-07	5.93464e-07	ARL6IP6	ENSG00000177917.10
332.439	-0.152559	0.154281	-0.988834	0.322744	0.466806	ARL8A	ENSG00000143862.7
987.298	0.418732	0.0715522	5.85211	4.85378e-09	3.02134e-08	ARL8B	ENSG00000134108.12
0						ARL9	ENSG00000196503.4
484.923	-0.218659	0.10759	-2.03234	0.0421194	0.0838436	ARMC1	ENSG00000104442.9
130.328	0.135492	0.195243	0.693963	0.487705	0.639881	ARMC10	ENSG00000170632.13
9.95545	-0.656768	0.678354	-0.96818	0.332955	0.478141	ARMC12	ENSG00000157343.8
12.7322	-1.01877	0.582342	-1.74943	0.0802162	0.147081	ARMC2	ENSG00000118690.12
3.69684	-1.27402	1.12455	-1.13292	0.257249	0.389551	ARMC3	ENSG00000165309.13
0						ARMC4	ENSG00000169126.15
146.463	-0.438966	0.211216	-2.07828	0.0376837	0.076109	ARMC5	ENSG00000140691.16
574.074	-0.882888	0.177342	-4.97843	6.41007e-07	3.09044e-06	ARMC6	ENSG00000105676.13
158.33	1.08559	0.204836	5.29982	1.15919e-07	6.10663e-07	ARMC7	ENSG00000125449.6
506.489	-0.0831432	0.0917236	-0.906454	0.364696	0.513508	ARMC8	ENSG00000114098.17
427.463	0.577463	0.107083	5.39266	6.94216e-08	3.76159e-07	ARMC9	ENSG00000135931.17
312.804	0.235195	0.126465	1.85976	0.0629199	0.118798	ARMCX1	ENSG00000126947.12
454.476	-0.862745	0.092455	-9.33151	1.04372e-20	1.64366e-19	ARMCX2	ENSG00000184867.13
754.415	0.275018	0.0957917	2.871	0.00409174	0.0106759	ARMCX3	ENSG00000102401.19
408.639	-0.436746	0.114859	-3.80246	0.000143269	0.000489492	ARMCX4	ENSG00000196440.11
104.828	-0.714625	0.207886	-3.43758	0.000586942	0.00179999	ARMCX5	ENSG00000125962.14
102.385	-0.635164	0.214513	-2.96096	0.00306683	0.00819713	ARMCX6	ENSG00000198960.10
32.5674	1.37114	0.373807	3.66804	0.000244416	0.000803799	ARMH1	ENSG00000198520.11
0						ARMH2	ENSG00000260286.3
312.815	0.0688592	0.12118	0.568241	0.569871	0.71313	ARMH3	ENSG00000120029.12
18.0439	-0.429039	0.517588	-0.828919	0.40715	0.558817	ARMH4	ENSG00000139971.15
0						ARMS2	ENSG00000254636.1
116.137	-0.023426	0.193802	-0.120876	0.903789	0.962991	ARMT1	ENSG00000146476.10
431.187	-0.764756	0.108815	-7.02802	2.09485e-12	1.81698e-11	ARNT	ENSG00000143437.20
669.936	-0.253415	0.0977844	-2.59157	0.00955384	0.0227981	ARNT2	ENSG00000172379.20
145.986	0.657882	0.180827	3.63818	0.000274577	0.000895406	ARNTL	ENSG00000133794.17
58.5898	0.641008	0.340327	1.88351	0.0596315	0.113337	ARNTL2	ENSG00000029153.14
304.332	-0.449755	0.116576	-3.85804	0.000114299	0.000397778	ARPC1A	ENSG00000241685.9
147.526	-1.01438	0.211048	-4.80638	1.5369e-06	7.04934e-06	ARPC1B	ENSG00000130429.14
1243.38	-0.32827	0.0661018	-4.96612	6.83058e-07	3.28057e-06	ARPC2	ENSG00000163466.15
975.771	-0.296487	0.0842084	-3.52087	0.000430138	0.00135086	ARPC3	ENSG00000111229.15
476.804	0.181771	0.104305	1.74269	0.0813885	0.14903	ARPC4	ENSG00000241553.12
9.04739	1.62663	0.766797	2.12134	0.0338934	0.069399	ARPC4-TTLL3	ENSG00000250151.9
831.235	-0.0208912	0.0944414	-0.221208	0.824931	0.905732	ARPC5	ENSG00000162704.15
398.152	0.0150832	0.115813	0.130238	0.896378	0.957095	ARPC5L	ENSG00000136950.13
370.195	-0.791607	0.105556	-7.4994	6.41115e-14	6.30487e-13	ARPIN	ENSG00000242498.7
2950.41	-0.313774	0.0532143	-5.89642	3.71468e-09	2.3454e-08	ARPP19	ENSG00000128989.10
25.7822	1.38154	0.513672	2.68954	0.00715504	0.017562	ARPP21	ENSG00000172995.16
0						ARR3	ENSG00000120500.17
296.644	-0.470422	0.129211	-3.64074	0.00027186	0.000887255	ARRB1	ENSG00000137486.16
527.08	-0.183163	0.111622	-1.64092	0.100815	0.179191	ARRB2	ENSG00000141480.17
177.87	1.35077	0.168514	8.01578	1.09444e-15	1.23313e-14	ARRDC1	ENSG00000197070.13
50.8101	0.782312	0.291653	2.68234	0.00731088	0.0178987	ARRDC2	ENSG00000105643.9
815.524	0.589762	0.0803037	7.34415	2.07071e-13	1.94158e-12	ARRDC3	ENSG00000113369.8
425.544	-0.0278585	0.115295	-0.241629	0.809068	0.905732	ARRDC4	ENSG00000140450.8
0						ARRDC5	ENSG00000205784.2
191.038	1.45803	0.165701	8.79916	1.37843e-18	1.87879e-17	ARSA	ENSG00000100299.17
673.603	1.2834	0.106429	12.0588	1.74358e-33	5.20998e-32	ARSB	ENSG00000113273.16
195.65	2.42813	0.172215	14.0994	3.82854e-45	2.02801e-43	ARSD	ENSG00000006756.15
0.250388	2.37789	4.3306	0.54909	0.582943	0.723968	ARSE	ENSG00000157399.14
6.73772	3.5299	1.0794	3.27025	0.00107451	0.00313552	ARSF	ENSG00000062096.14
45.8693	0.727259	0.374884	1.93996	0.0523849	0.101347	ARSG	ENSG00000141337.12
0						ARSH	ENSG00000205667.2
0.460447	0	4.40736	0	1	1	ARSI	ENSG00000183876.8
1.87218	1.84125	2.13592	0.86204	0.388666	0.539201	ARSJ	ENSG00000180801.13
107.872	0.280715	0.246483	1.13888	0.254753	0.386344	ARSK	ENSG00000164291.16
0						ART1	ENSG00000129744.2
0						ART3	ENSG00000156219.16
0.0801831	0	4.40736	0	1	1	ART4	ENSG00000111339.11
3.5199	3.7436	1.60571	2.33142	0.019731	0.043227	ART5	ENSG00000167311.13
1.88266	0.368399	1.9278	0.191098	0.848449	0.919216	ARTN	ENSG00000117407.16
114.427	-0.627594	0.208236	-3.01386	0.00257945	0.00700695	ARV1	ENSG00000173409.13
1635.26	-0.449702	0.0579833	-7.75571	8.78488e-15	9.25276e-14	ARVCF	ENSG00000099889.13
0.702455	-2.23053	3.1086	-0.717535	0.473044	0.625575	ARX	ENSG00000004848.7
36.8908	-0.645411	0.786342	-0.820776	0.411774	0.563645	AS3MT	ENSG00000214435.7
525.298	-0.133068	0.1071	-1.24246	0.214067	0.336152	ASAH1	ENSG00000104763.18
30.1657	0.845257	0.382448	2.21012	0.0270966	0.0571091	ASAH2	ENSG00000188611.14
115.114	0.403074	0.208443	1.93374	0.0531453	0.102561	ASAH2B	ENSG00000204147.10
743.298	-0.650186	0.0853726	-7.61586	2.61936e-14	2.66593e-13	ASAP1	ENSG00000153317.14
716.98	-0.657285	0.0847989	-7.7511	9.10991e-15	9.57656e-14	ASAP2	ENSG00000151693.10
136.054	-0.208738	0.210442	-0.991903	0.321245	0.465256	ASAP3	ENSG00000088280.18
888.786	0.545186	0.0782102	6.97078	3.15184e-12	2.69085e-11	ASB1	ENSG00000065802.11
0.4788	3.06907	4.29899	0.713906	0.475285	0.627187	ASB10	ENSG00000146926.10
0						ASB11	ENSG00000165192.13
3.04198	4.29092	1.65723	2.58921	0.0096195	0.022918	ASB12	ENSG00000198881.9
322.416	-0.767835	0.145685	-5.27052	1.36038e-07	7.11139e-07	ASB13	ENSG00000196372.12
5.70764	0.536719	1.05037	0.51098	0.609365	0.746722	ASB14	ENSG00000239388.8
0						ASB15	ENSG00000146809.12
72.9616	1.12257	0.304847	3.68239	0.000231054	0.000762776	ASB16	ENSG00000161664.6
0						ASB17	ENSG00000154007.6
2.15162	-0.11963	3.49262	-0.0342522	0.972676	1	ASB18	ENSG00000182177.14
0						ASB2	ENSG00000100628.11
16.6823	-0.110523	0.553922	-0.199528	0.841849	0.914128	ASB3	ENSG00000115239.21
0.0834625	0.940989	4.40736	0.213504	0.830934	0.905732	ASB4	ENSG00000005981.12
2.79346	4.28782	1.85111	2.31636	0.0205388	0.0447444	ASB5	ENSG00000164122.8
519.797	0.642506	0.123207	5.21485	1.83964e-07	9.42936e-07	ASB6	ENSG00000148331.11
189.869	0.0767006	0.153133	0.500876	0.616458	0.753259	ASB7	ENSG00000183475.12
190.328	0.135756	0.16119	0.842211	0.39967	0.550963	ASB8	ENSG00000177981.10
0.162149	-1.78077	4.37641	-0.406902	0.68408	0.80475	ASB9	ENSG00000102048.15
265.598	-0.26882	0.137746	-1.95156	0.0509901	0.0990125	ASCC1	ENSG00000138303.17
570.914	0.492125	0.0990576	4.96807	6.76236e-07	3.25163e-06	ASCC2	ENSG00000100325.14
542.267	0.824348	0.099358	8.29674	1.07009e-16	1.29131e-15	ASCC3	ENSG00000112249.13
2407.07	-0.299715	0.106984	-2.80149	0.00508676	0.0129652	ASCL1	ENSG00000139352.3
9.33376	-3.97403	1.00699	-3.94645	7.93174e-05	0.000283289	ASCL2	ENSG00000183734.4
0						ASCL3	ENSG00000176009.3
0						ASCL4	ENSG00000187855.5
5.83888	3.98246	1.40298	2.83857	0.00453156	0.0117117	ASCL5	ENSG00000232237.3
150.851	-0.129806	0.16326	-0.79509	0.426561	0.579704	ASF1A	ENSG00000111875.7
596.485	-0.0206884	0.110146	-0.187826	0.851013	0.920952	ASF1B	ENSG00000105011.8
8.92411	0.0138463	0.663389	0.0208721	0.983348	1	ASGR1	ENSG00000141505.11
0						ASGR2	ENSG00000161944.16
1060.54	0.463254	0.0683156	6.78109	1.1927e-11	9.64746e-11	ASH1L	ENSG00000116539.12
528.572	0.333277	0.0962677	3.46198	0.000536213	0.00165751	ASH2L	ENSG00000129691.15
774.679	0.222602	0.0874745	2.54477	0.010935	0.0257141	ASIC1	ENSG00000110881.11
78.6684	0.788759	0.260214	3.0312	0.00243587	0.00665125	ASIC2	ENSG00000108684.14
134.255	-0.564256	0.175628	-3.21278	0.00131457	0.00378124	ASIC3	ENSG00000213199.7
1.63685	4.11545	2.428	1.695	0.0900761	0.162763	ASIC4	ENSG00000072182.12
0						ASIC5	ENSG00000256394.2
0						ASIP	ENSG00000101440.9
121.415	1.59963	0.207671	7.70272	1.33197e-14	1.38151e-13	ASL	ENSG00000126522.16
0						ASMT	ENSG00000196433.12
0						ASMTL	ENSG00000169093.15
511.698	-0.327101	0.0952036	-3.43581	0.000590791	0.00181077	ASNA1	ENSG00000198356.11
64.7231	-0.391126	0.26475	-1.47734	0.139584	0.236015	ASNS	ENSG00000070669.16
517.428	-0.159136	0.103549	-1.53682	0.124337	0.214254	ASNSD1	ENSG00000138381.9
1.7666	1.93411	2.08346	0.928314	0.353245	0.500773	ASPA	ENSG00000108381.10
33.9508	0.472974	0.421274	1.12272	0.261555	0.394715	ASPDH	ENSG00000204653.9
1.13856	-3.20922	2.69683	-1.19	0.234047	0.360779	ASPG	ENSG00000166183.15
575.258	-0.277525	0.088732	-3.12768	0.00176192	0.00494337	ASPH	ENSG00000198363.17
422.282	0.17895	0.116505	1.53599	0.124541	0.21456	ASPHD1	ENSG00000174939.10
191.285	0.207748	0.169809	1.22342	0.221169	0.344828	ASPHD2	ENSG00000128203.6
2022.23	0.0388418	0.0550112	0.70607	0.480144	0.632226	ASPM	ENSG00000066279.17
0						ASPN	ENSG00000106819.11
9.24401	2.02819	1.50648	1.34631	0.178201	0.288771	ASPRV1	ENSG00000244617.2
352.082	-0.248526	0.102391	-2.42723	0.0152145	0.0344534	ASPSCR1	ENSG00000169696.15
401.464	0.263589	0.108291	2.43409	0.0149293	0.0338763	ASRGL1	ENSG00000162174.12
7765.5	-0.739756	0.0587646	-12.5885	2.44378e-36	8.50114e-35	ASS1	ENSG00000130707.17
98.0335	0.0716032	0.205152	0.349025	0.727071	0.840156	ASTE1	ENSG00000034533.11
0.538639	0	4.40736	0	1	1	ASTL	ENSG00000188886.3
373.13	0.330371	0.138225	2.39009	0.0168443	0.037615	ASTN1	ENSG00000152092.15
1756.56	0.60007	0.0601579	9.97492	1.96264e-23	3.66787e-22	ASTN2	ENSG00000148219.16
2142.79	-0.0533071	0.057217	-0.931666	0.351509	0.498945	ASXL1	ENSG00000171456.18
454.602	-0.22408	0.114937	-1.94958	0.0512261	0.0993959	ASXL2	ENSG00000143970.16
150.249	-0.229619	0.177727	-1.29197	0.196366	0.313291	ASXL3	ENSG00000141431.11
0						ASZ1	ENSG00000154438.7
1161.11	0.408407	0.0815737	5.0066	5.54007e-07	2.69568e-06	ATAD1	ENSG00000138138.13
1444.78	-0.35983	0.0687398	-5.23467	1.65284e-07	8.54167e-07	ATAD2	ENSG00000156802.12
265.233	-0.120261	0.135595	-0.886914	0.375125	0.525201	ATAD2B	ENSG00000119778.14
282.525	-0.103409	0.13243	-0.780852	0.43489	0.587645	ATAD3A	ENSG00000197785.13
310.551	0.809529	0.123897	6.53388	6.40891e-11	4.84979e-10	ATAD3B	ENSG00000160072.19
0.860843	-0.335623	3.56468	-0.0941522	0.924988	0.979629	ATAD3C	ENSG00000215915.9
318.812	-0.616013	0.12664	-4.86429	1.14871e-06	5.36534e-06	ATAD5	ENSG00000176208.8
0						ATAT1	ENSG00000137343.17
1905.89	0.411298	0.0700873	5.86836	4.40117e-09	2.75221e-08	ATCAY	ENSG00000167654.17
597.273	0.188043	0.094995	1.97951	0.0477589	0.0934948	ATE1	ENSG00000107669.17
191.849	0.127342	0.143468	0.887598	0.374757	0.524861	ATF1	ENSG00000123268.8
838.148	0.140781	0.084961	1.657	0.0975186	0.174262	ATF2	ENSG00000115966.16
420.83	1.70599	0.131589	12.9645	1.94371e-38	7.62298e-37	ATF3	ENSG00000162772.16
2937.16	0.00552329	0.0612521	0.0901731	0.92815	0.982339	ATF4	ENSG00000128272.14
175.148	1.66417	0.337521	4.93056	8.19963e-07	3.90476e-06	ATF5	ENSG00000169136.10
629.863	0.267009	0.0990583	2.69548	0.0070288	0.0173016	ATF6	ENSG00000118217.5
8.57439	0.985974	2.45783	0.401157	0.688305	0.805794	ATF6B	ENSG00000213676.12
298.546	-0.343605	0.129178	-2.65993	0.00781565	0.0190005	ATF7	ENSG00000170653.18
1573.97	-0.135743	0.0622292	-2.18134	0.0291582	0.0609267	ATF7IP	ENSG00000171681.12
0.738471	-3.95202	3.77732	-1.04625	0.295446	0.434958	ATF7IP2	ENSG00000166669.13
136.371	-1.14024	0.21878	-5.21181	1.87003e-07	9.57611e-07	ATG10	ENSG00000152348.15
198.697	0.150035	0.153188	0.979417	0.327374	0.472163	ATG101	ENSG00000123395.14
575.533	-0.241734	0.0863471	-2.79956	0.00511728	0.0130288	ATG12	ENSG00000145782.12
694.735	0.500928	0.090819	5.51568	3.47441e-08	1.94928e-07	ATG13	ENSG00000175224.16
227.641	0.165894	0.159505	1.04006	0.298314	0.438586	ATG14	ENSG00000126775.8
482.689	0.432027	0.215984	2.00027	0.0454709	0.089588	ATG16L1	ENSG00000085978.21
395.052	-0.0630393	0.133034	-0.47386	0.6356	0.770875	ATG16L2	ENSG00000168010.10
418.405	1.46737	0.117663	12.4709	1.07638e-35	3.61341e-34	ATG2A	ENSG00000110046.12
757.046	0.221871	0.0973169	2.27988	0.0226149	0.0487271	ATG2B	ENSG00000066739.11
362.22	0.108613	0.109205	0.994577	0.319942	0.463863	ATG3	ENSG00000144848.10
83.6418	0.822189	0.230079	3.57351	0.000352227	0.00112348	ATG4A	ENSG00000101844.17
1350.91	0.810006	0.0784333	10.3273	5.30176e-25	1.08394e-23	ATG4B	ENSG00000168397.16
143.111	-0.236744	0.191201	-1.23819	0.215645	0.338128	ATG4C	ENSG00000125703.14
344.272	0.516526	0.148279	3.48347	0.000494956	0.00153901	ATG4D	ENSG00000130734.9
121.734	0.537288	0.197218	2.72433	0.0064432	0.0160441	ATG5	ENSG00000057663.15
485.748	-0.64257	0.101436	-6.33473	2.3775e-10	1.70726e-09	ATG7	ENSG00000197548.12
379.104	0.412693	0.13525	3.05133	0.00227831	0.00625872	ATG9A	ENSG00000198925.11
95.2874	0.976398	0.236456	4.12931	3.6386e-05	0.000137416	ATG9B	ENSG00000181652.19
1068.41	-0.885932	0.0738989	-11.9884	4.08616e-33	1.20553e-31	ATIC	ENSG00000138363.14
322.628	-0.0831707	0.124372	-0.668726	0.503671	0.654615	ATL1	ENSG00000198513.11
637.514	-0.269631	0.0995439	-2.70866	0.00675548	0.0167247	ATL2	ENSG00000119787.13
275.916	0.0456396	0.13717	0.332722	0.739344	0.851718	ATL3	ENSG00000184743.12
908.845	0.088419	0.0794291	1.11318	0.265631	0.399426	ATM	ENSG00000149311.18
480.35	0.234547	0.0994977	2.35731	0.0184078	0.0406887	ATMIN	ENSG00000166454.9
2061.31	0.556734	0.0756054	7.36368	1.78906e-13	1.68915e-12	ATN1	ENSG00000111676.14
0.0918546	0	4.40736	0	1	1	ATOH1	ENSG00000172238.4
4.53223	0.00912826	1.11091	0.00821692	0.993444	1	ATOH7	ENSG00000179774.8
185.801	0.107421	0.183145	0.586538	0.557514	0.701677	ATOH8	ENSG00000168874.12
125.045	-0.303043	0.198923	-1.52342	0.127655	0.218884	ATOX1	ENSG00000177556.11
26.8494	-0.323929	0.401233	-0.807336	0.419473	0.572312	ATP10A	ENSG00000206190.11
0.197335	0	4.40736	0	1	1	ATP10B	ENSG00000118322.13
253.828	1.56198	0.155668	10.034	1.08066e-23	2.05969e-22	ATP10D	ENSG00000145246.13
1081.08	0.134594	0.0749173	1.79657	0.0724038	0.134525	ATP11A	ENSG00000068650.18
379.394	0.0666528	0.124335	0.536076	0.591906	0.730204	ATP11B	ENSG00000058063.15
1019.88	-0.513236	0.0646414	-7.93974	2.02611e-15	2.24565e-14	ATP11C	ENSG00000101974.14
2.30611	1.69214	1.78546	0.947734	0.343265	0.489543	ATP12A	ENSG00000075673.11
1289.75	0.617728	0.0741608	8.32957	8.11341e-17	9.94518e-16	ATP13A1	ENSG00000105726.16
375.388	-0.236944	0.117079	-2.02379	0.042992	0.0853613	ATP13A2	ENSG00000159363.17
1632.7	-0.339075	0.0578032	-5.86603	4.46356e-09	2.78802e-08	ATP13A3	ENSG00000133657.15
4.59988	6.03229	1.49455	4.0362	5.4324e-05	0.000198499	ATP13A4	ENSG00000127249.14
0						ATP13A5	ENSG00000187527.10
3337.34	-0.00686462	0.0512215	-0.134018	0.893388	0.954446	ATP1A1	ENSG00000163399.15
0						ATP1A2	ENSG00000018625.14
440.573	-0.172567	0.110528	-1.5613	0.118452	0.205787	ATP1A3	ENSG00000105409.18
0						ATP1A4	ENSG00000132681.16
5347.95	0.641504	0.0539023	11.9012	1.16614e-32	3.36735e-31	ATP1B1	ENSG00000143153.12
14.3054	2.30708	0.695117	3.31898	0.000903483	0.0026718	ATP1B2	ENSG00000129244.8
1130.18	-0.023215	0.0746929	-0.310806	0.755948	0.864524	ATP1B3	ENSG00000069849.10
0						ATP1B4	ENSG00000101892.11
0.936934	-2.42166	2.93267	-0.825752	0.408945	0.560855	ATP23	ENSG00000166896.8
38.2097	1.90538	0.381168	4.99879	5.76898e-07	2.79955e-06	ATP2A1	ENSG00000196296.13
4871.66	-0.0712917	0.0461105	-1.54611	0.122079	0.210876	ATP2A2	ENSG00000174437.16
45.0088	1.8945	0.37305	5.07839	3.80637e-07	1.88699e-06	ATP2A3	ENSG00000074370.17
823.504	0.422351	0.0806348	5.23783	1.62479e-07	8.41005e-07	ATP2B1	ENSG00000070961.15
197.352	0.7945	0.159364	4.98545	6.18187e-07	2.98748e-06	ATP2B2	ENSG00000157087.18
119.804	-0.400626	0.200127	-2.00186	0.0453003	0.0893572	ATP2B3	ENSG00000067842.17
120.583	0.775356	0.193676	4.00336	6.24498e-05	0.000226516	ATP2B4	ENSG00000058668.14
2224.85	0.132964	0.0533045	2.49442	0.0126164	0.0291595	ATP2C1	ENSG00000017260.19
3.50457	5.03929	1.77329	2.84178	0.00448631	0.0116071	ATP2C2	ENSG00000064270.12
0.495472	3.36124	4.28951	0.783595	0.433278	0.586144	ATP4A	ENSG00000105675.8
0						ATP4B	ENSG00000186009.4
4212.68	-0.586961	0.0574862	-10.2105	1.7798e-24	3.52396e-23	ATP5F1A	ENSG00000152234.15
6023.3	-0.231491	0.0424943	-5.44757	5.10615e-08	2.80968e-07	ATP5F1B	ENSG00000110955.8
1116.37	-0.285618	0.0672824	-4.24506	2.18537e-05	8.49316e-05	ATP5F1C	ENSG00000165629.19
663.769	-0.546155	0.0920444	-5.9336	2.96359e-09	1.89537e-08	ATP5F1D	ENSG00000099624.7
915.454	-0.201788	0.0875584	-2.30461	0.0211884	0.046006	ATP5F1E	ENSG00000124172.9
248.09	0.0426668	0.13215	0.322866	0.746797	0.857725	ATP5IF1	ENSG00000130770.17
512.568	-0.843165	0.108366	-7.78069	7.21275e-15	7.64627e-14	ATP5MC1	ENSG00000159199.13
802.545	-1.13994	0.105071	-10.8492	2.01089e-27	4.59491e-26	ATP5MC2	ENSG00000135390.18
980.954	-0.453355	0.0752426	-6.02525	1.68851e-09	1.10991e-08	ATP5MC3	ENSG00000154518.9
249.679	-0.287956	0.160293	-1.79643	0.0724257	0.134551	ATP5MD	ENSG00000173915.15
120.66	-0.549501	0.260362	-2.11053	0.0348127	0.0710228	ATP5ME	ENSG00000169020.9
291.035	-0.644349	0.138482	-4.65295	3.27218e-06	1.43254e-05	ATP5MF	ENSG00000241468.7
0.56191	0.940956	4.40736	0.213497	0.83094	0.905732	ATP5MF-PTCD1	ENSG00000248919.7
608.632	-0.290184	0.0999029	-2.90466	0.00367657	0.00968408	ATP5MG	ENSG00000167283.7
0.323244	2.74827	4.31182	0.637381	0.523877	0.670729	ATP5MGL	ENSG00000249222.1
376.318	-0.250115	0.115579	-2.16402	0.0304627	0.0633282	ATP5MPL	ENSG00000156411.9
1228.7	-0.241267	0.0712218	-3.38755	0.000705201	0.0021252	ATP5PB	ENSG00000116459.10
579.356	-0.328011	0.233267	-1.40616	0.159676	0.264184	ATP5PD	ENSG00000167863.11
454.761	-0.0440734	0.0985457	-0.447238	0.654703	0.784135	ATP5PF	ENSG00000154723.12
552.306	-0.529449	0.110451	-4.79354	1.63864e-06	7.49283e-06	ATP5PO	ENSG00000241837.6
171.653	-0.76973	0.197388	-3.89957	9.63626e-05	0.000338827	ATP5S	ENSG00000125375.14
1861.1	0.908655	0.0681471	13.3337	1.47344e-40	6.30949e-39	ATP6AP1	ENSG00000071553.16
140.2	0.185029	0.19793	0.93482	0.349881	0.497239	ATP6AP1L	ENSG00000205464.12
825.85	0.573935	0.0922954	6.21845	5.0208e-10	3.48127e-09	ATP6AP2	ENSG00000182220.14
1858.98	0.569162	0.0608498	9.35356	8.47471e-21	1.34108e-19	ATP6V0A1	ENSG00000033627.16
490.647	0.202046	0.110211	1.83326	0.0667634	0.125373	ATP6V0A2	ENSG00000185344.13
0.241829	1.86191	4.36601	0.426455	0.669776	0.796128	ATP6V0A4	ENSG00000105929.16
930.935	0.320587	0.0776669	4.12771	3.66389e-05	0.000138307	ATP6V0B	ENSG00000117410.13
627.958	0.466385	0.108315	4.30583	1.66363e-05	6.5879e-05	ATP6V0C	ENSG00000185883.11
661.793	0.429664	0.0955532	4.4966	6.90491e-06	2.87675e-05	ATP6V0D1	ENSG00000159720.11
0						ATP6V0D2	ENSG00000147614.3
340.577	-0.309843	0.120382	-2.57383	0.0100579	0.0238579	ATP6V0E1	ENSG00000113732.8
717.269	0.575698	0.155063	3.71267	0.000205086	0.000683689	ATP6V0E2	ENSG00000171130.18
855.059	0.479096	0.0855307	5.60145	2.12562e-08	1.22413e-07	ATP6V1A	ENSG00000114573.9
4.19846	0.0599172	1.11533	0.0537215	0.957157	1	ATP6V1B1	ENSG00000116039.12
1678.12	0.434244	0.0607053	7.15332	8.47027e-13	7.55976e-12	ATP6V1B2	ENSG00000147416.10
[truncated: 18,075 more rows]

## Sheet: SK-N-AS_24hrs_vs_0hrs
baseMean	log2FoldChange	lfcSE	stat	pvalue	padj	HGNC	ENSG
[truncated: 19,907 more rows]

## Sheet: SK-N-AS_48hrs_vs_0hrs
baseMean	log2FoldChange	lfcSE	stat	pvalue	padj	HGNC	ENSG
[truncated: 19,907 more rows]

[truncated: 1 more sheets: SK-N-AS_72hrs_vs_0hrs]
