# Supplementary material for: RUVBL1 and RUVBL2 as novel druggable DNA Damage Response regulators in the N-Myc regulatory network in neuroblastoma
Source: Research Square preprint supplement (doi:10.21203/rs.3.rs-3206227/v1), 2023-11-20
Supplement: Supplementary file 2 [file 4ca7b81507e53eb8e5a5397f.xlsx]

## Sheet: Fig.1f_Coxph_ECDF
factor.name	HR	95% CI	P value
DEFB128	136.85	(15.97 - 1172.48)	7.17841e-06
LCE3E	136.85	(15.97 - 1172.48)	7.17841e-06
OR4K17	136.85	(15.97 - 1172.48)	7.17841e-06
OR51S1	44.43	(9.88 - 199.73)	7.53235e-07
OR10Z1	14.08	(1.84 - 107.98)	0.0109584
WFDC9	12.42	(2.9 - 53.23)	0.000692138
MAD2L1	11.27	(4.39 - 28.9)	4.63685e-07
DAOA	10.18	(1.36 - 76.02)	0.0237228
OR4A16	8.66	(2.03 - 36.92)	0.0035021
TCHHL1	7.68	(1.74 - 33.78)	0.00702046
OR6C1	7.44	(0.99 - 55.92)	0.0512223
OR4C46	7.42	(0.98 - 56.3)	0.0526581
HNRNPD	7.29	(3.22 - 16.49)	1.85579e-06
OR6C2	6.99	(1.68 - 29.03)	0.00740631
CNIH4	6.78	(2.96 - 15.54)	6.12771e-06
POLA1	6.61	(2.9 - 15.09)	7.29118e-06
CDCA5	6.42	(2.94 - 14.04)	3.149e-06
CKS2	6.33	(3.05 - 13.14)	7.13038e-07
MND1	6.24	(2.86 - 13.63)	4.28427e-06
OR52A5	6.06	(1.46 - 25.17)	0.0132112
EXOSC9	6.03	(2.78 - 13.07)	5.28323e-06
OR6C70	5.94	(0.8 - 44.3)	0.0821121
OR4L1	5.85	(0.79 - 43.33)	0.0837318
SLC25A5	5.85	(2.5 - 13.67)	4.61922e-05
CDKN3	5.8	(2.8 - 12.02)	2.3e-06
POLE3	5.78	(2.63 - 12.69)	1.26388e-05
LSM4	5.61	(2.7 - 11.68)	3.9572e-06
FAM72A	5.56	(2.76 - 11.2)	1.55316e-06
RCOR2	5.54	(2.48 - 12.36)	2.8795e-05
REG1B	5.53	(0.73 - 41.58)	0.0967813
GMPS	5.47	(2.46 - 12.14)	2.96209e-05
GAR1	5.43	(2.51 - 11.78)	1.80996e-05
BPY2B	5.42	(0.73 - 40)	0.097715
BPY2C	5.42	(0.73 - 40)	0.097715
HNRNPC	5.33	(2.49 - 11.4)	1.57976e-05
KIF4A	5.32	(2.64 - 10.69)	2.75983e-06
NUDT5	5.24	(2.62 - 10.48)	2.82017e-06
DYNC2I2	5.14	(2.66 - 9.94)	1.0758e-06
ELK1	5.13	(2.2 - 11.98)	0.000158754
KIF4B	5.12	(2.57 - 10.22)	3.61023e-06
AEN	5.11	(2.46 - 10.65)	1.30683e-05
FAM72D	5.08	(2.6 - 9.93)	2.05149e-06
HNRNPL	5.08	(2.5 - 10.34)	7.11216e-06
LRR1	5.08	(2.4 - 10.77)	2.15767e-05
PRMT5	5.08	(2.29 - 11.31)	6.71476e-05
EXO1	5.07	(2.48 - 10.36)	8.46133e-06
SPACA7	5.07	(0.68 - 37.76)	0.112946
ALYREF	5.05	(2.37 - 10.8)	2.89289e-05
PTTG1	5.02	(2.55 - 9.85)	2.83785e-06
TPX2	4.99	(2.57 - 9.72)	2.20713e-06
PTTG2	4.98	(2.53 - 9.78)	3.21321e-06
CDCA2	4.97	(2.55 - 9.69)	2.46644e-06
RTRAF	4.93	(2.42 - 10.06)	1.14757e-05
OR5B17	4.92	(0.64 - 37.62)	0.124778
OR5M8	4.9	(0.63 - 38.1)	0.129166
FAM72B	4.86	(2.46 - 9.59)	5.25176e-06
SNRPG	4.86	(2.56 - 9.22)	1.34769e-06
SEM1	4.83	(2.3 - 10.15)	3.31436e-05
SLBP	4.75	(2.3 - 9.82)	2.56362e-05
CT83	4.72	(1.69 - 13.15)	0.00302932
OR6Q1	4.72	(0.62 - 35.96)	0.134593
CENPU	4.7	(2.4 - 9.24)	6.82364e-06
AURKA	4.64	(2.37 - 9.07)	7.44189e-06
SNRPB	4.63	(2.26 - 9.46)	2.68734e-05
OR4K14	4.62	(0.62 - 34.24)	0.134236
BANF1	4.58	(2.13 - 9.86)	0.000101425
FAM83D	4.57	(2.29 - 9.14)	1.72758e-05
WDR74	4.56	(2.12 - 9.79)	9.92821e-05
OR51G1	4.55	(0.61 - 33.97)	0.139916
ERCC6L	4.51	(2.19 - 9.28)	4.19209e-05
MRPL11	4.51	(1.96 - 10.36)	0.000381307
DPM1	4.48	(2.53 - 7.93)	2.57734e-07
SSRP1	4.47	(2.08 - 9.61)	0.000123361
XRCC4	4.47	(2.35 - 8.51)	5.17565e-06
CDCA4	4.46	(2.15 - 9.24)	5.8455e-05
BUB1	4.44	(2.4 - 8.22)	2.08936e-06
CCNB2	4.42	(2.29 - 8.53)	9.23431e-06
NXT1	4.4	(2.14 - 9.06)	5.81553e-05
CENPF	4.38	(2.35 - 8.16)	3.22081e-06
NUP37	4.37	(2.22 - 8.6)	1.99786e-05
INSL4	4.24	(1.51 - 11.86)	0.00593904
NEIL3	4.23	(2.19 - 8.18)	1.78198e-05
CCNA2	4.2	(2.26 - 7.8)	5.6603e-06
LDHA	4.2	(2.24 - 7.91)	8.30986e-06
SPAG11A	4.17	(1.76 - 9.85)	0.00114678
SPRR2A	4.17	(0.55 - 31.4)	0.165885
H2AZ1	4.16	(2.07 - 8.33)	5.87262e-05
TIPIN	4.12	(2.17 - 7.83)	1.49582e-05
ELAVL1	4.11	(2.15 - 7.86)	1.85845e-05
CDK1	4.1	(2.18 - 7.71)	1.14724e-05
SNRPD1	4.08	(1.99 - 8.36)	0.00011957
STIP1	4.08	(2.08 - 7.99)	4.29766e-05
MRPS30	4.07	(2.12 - 7.81)	2.39413e-05
ACTL6A	4.05	(2.02 - 8.12)	8.10732e-05
ERH	4.05	(2.05 - 8.01)	5.73466e-05
DSCC1	4.04	(2.02 - 8.05)	7.41124e-05
ZNF367	4.03	(2.25 - 7.23)	2.85693e-06
CDC25C	4.01	(2.26 - 7.11)	1.96593e-06
CST9	4	(1.92 - 8.32)	0.00020783
PCNA	4	(2.09 - 7.66)	2.73458e-05
PSMB5	4	(2.01 - 7.95)	7.98089e-05
TAAR5	3.99	(1.96 - 8.09)	0.000127553
POGLUT2	3.98	(2.22 - 7.15)	3.78846e-06
THAP11	3.97	(2.1 - 7.48)	2.10023e-05
VRK1	3.97	(2.06 - 7.64)	3.84844e-05
RWDD4	3.94	(2.14 - 7.24)	1.00621e-05
SPC25	3.93	(2.14 - 7.22)	1.03583e-05
NUF2	3.92	(2.2 - 6.97)	3.35022e-06
TIMM9	3.92	(2.05 - 7.52)	3.85734e-05
CCNB1	3.9	(2.03 - 7.48)	4.25761e-05
SCML2	3.9	(2.04 - 7.43)	3.63576e-05
MCM6	3.89	(2.08 - 7.27)	2.01502e-05
NHP2	3.89	(1.95 - 7.78)	0.000117905
OR5H1	3.89	(0.51 - 29.6)	0.189014
UBE2T	3.89	(2.06 - 7.37)	2.98564e-05
CENPE	3.88	(2.11 - 7.1)	1.17032e-05
CEP55	3.88	(2.18 - 6.92)	4.03796e-06
FEN1	3.87	(1.85 - 8.11)	0.000331952
KIF18A	3.87	(2.01 - 7.46)	5.33724e-05
GGCT	3.86	(2.14 - 6.99)	7.62559e-06
HMGB3	3.86	(1.92 - 7.76)	0.000147216
LELP1	3.86	(0.53 - 28.37)	0.184521
CENPH	3.85	(2.04 - 7.27)	3.12751e-05
UBE2S	3.85	(1.91 - 7.77)	0.000166299
HDGFL2	3.83	(2.04 - 7.22)	3.11518e-05
GINS1	3.82	(1.95 - 7.49)	9.88287e-05
LMNB2	3.82	(2.06 - 7.1)	2.19319e-05
SAAL1	3.82	(1.82 - 8.03)	0.00041106
CLPP	3.81	(1.96 - 7.44)	8.55188e-05
DLGAP5	3.8	(2.03 - 7.11)	3.08381e-05
SPRR1B	3.8	(0.52 - 27.57)	0.186674
MIS18A	3.79	(1.9 - 7.57)	0.000159129
ODC1	3.79	(1.8 - 7.95)	0.000435979
HMMR	3.78	(2.2 - 6.5)	1.50667e-06
KXD1	3.78	(1.82 - 7.85)	0.000360983
PARPBP	3.78	(2.13 - 6.7)	5.50669e-06
MRPL4	3.77	(1.86 - 7.65)	0.000236289
NR2C2AP	3.77	(1.81 - 7.82)	0.000372293
OR4B1	3.77	(0.52 - 27.45)	0.190389
IPO11	3.76	(2.13 - 6.66)	5.35821e-06
PSMA7	3.74	(2.08 - 6.74)	1.12957e-05
CENPA	3.73	(1.96 - 7.09)	5.83879e-05
BRIX1	3.72	(1.99 - 6.95)	3.96768e-05
GADD45GIP1	3.72	(1.91 - 7.25)	0.000113477
NDC80	3.72	(2.07 - 6.7)	1.18249e-05
SDHAF3	3.72	(2.03 - 6.84)	2.27867e-05
TTK	3.71	(2.15 - 6.4)	2.34295e-06
CDK2	3.7	(1.97 - 6.95)	4.69376e-05
KIF20A	3.7	(2.01 - 6.82)	2.76605e-05
OR10P1	3.7	(0.89 - 15.47)	0.0727023
PPID	3.68	(1.93 - 6.99)	7.07599e-05
OR4D11	3.64	(1.14 - 11.62)	0.0292142
C4orf46	3.63	(1.9 - 6.91)	8.91374e-05
RMI2	3.63	(1.87 - 7.05)	0.000144429
MCM10	3.62	(1.92 - 6.83)	7.23039e-05
ARHGAP11A	3.61	(2.02 - 6.46)	1.56884e-05
NPM1	3.61	(1.95 - 6.71)	4.69524e-05
ORC6	3.59	(1.81 - 7.12)	0.000245446
PAICS	3.59	(1.88 - 6.82)	0.000100015
RBBP8	3.58	(2.1 - 6.12)	3.07529e-06
HELLS	3.57	(1.89 - 6.76)	9.12557e-05
MCM3	3.57	(1.82 - 7.02)	0.000220677
PLK4	3.57	(1.94 - 6.58)	4.52073e-05
MRPL3	3.56	(1.83 - 6.94)	0.000184707
RNASEH2A	3.56	(1.8 - 7.06)	0.000270661
TACC3	3.54	(1.98 - 6.32)	1.8731e-05
CCDC138	3.53	(2.08 - 5.98)	2.81335e-06
FKBP3	3.53	(1.97 - 6.31)	2.10493e-05
UTP3	3.53	(1.9 - 6.57)	6.90887e-05
CCDC86	3.52	(1.71 - 7.22)	0.000620621
KIF11	3.52	(1.97 - 6.31)	2.3089e-05
SUV39H2	3.52	(1.8 - 6.89)	0.000227519
ARL2	3.51	(1.78 - 6.91)	0.000281001
COA6	3.5	(1.9 - 6.48)	6.29455e-05
ABCE1	3.49	(1.95 - 6.22)	2.37661e-05
IFNA8	3.49	(0.85 - 14.4)	0.0840179
CENPN	3.48	(1.85 - 6.56)	0.000112264
HNRNPF	3.48	(1.86 - 6.5)	9.11897e-05
OR5M11	3.48	(1.89 - 6.4)	6.28716e-05
RBMX	3.48	(1.82 - 6.65)	0.000166219
KTN1	3.47	(2.23 - 5.4)	3.25097e-08
UBE2C	3.47	(1.84 - 6.55)	0.000125741
CCT4	3.46	(1.96 - 6.11)	1.76539e-05
SYT14	3.46	(1.83 - 6.54)	0.000134915
BIRC5	3.45	(1.74 - 6.86)	0.000406265
SGO2	3.45	(2.01 - 5.92)	6.70616e-06
NSDHL	3.44	(1.91 - 6.19)	3.694e-05
MELK	3.43	(1.92 - 6.13)	3.04979e-05
NEK2	3.43	(1.96 - 6)	1.54741e-05
NIF3L1	3.43	(1.95 - 6.03)	1.86709e-05
RRM1	3.43	(1.74 - 6.77)	0.000373384
CSE1L	3.42	(1.89 - 6.19)	4.9752e-05
DHFR	3.41	(1.77 - 6.56)	0.000237206
MRPL34	3.41	(1.93 - 6.01)	2.27118e-05
TICRR	3.41	(1.82 - 6.37)	0.000124264
MAPRE1	3.4	(2.11 - 5.47)	4.74016e-07
PSMA6	3.4	(1.74 - 6.64)	0.000352886
NDUFA7	3.39	(1.79 - 6.44)	0.000183144
PRIM2	3.39	(1.91 - 6.02)	3.19071e-05
SNRPF	3.39	(1.7 - 6.77)	0.000547124
UBL4A	3.39	(1.81 - 6.35)	0.000142348
ANP32E	3.38	(2.01 - 5.7)	4.82244e-06
PAM16	3.38	(1.76 - 6.48)	0.000246044
HPF1	3.37	(1.83 - 6.2)	9.33626e-05
POLR3K	3.36	(1.75 - 6.44)	0.000261564
SNRPE	3.36	(1.72 - 6.58)	0.000410037
UHRF1	3.36	(1.74 - 6.47)	0.000297172
HSD17B10	3.33	(1.89 - 5.89)	3.39965e-05
NIFK	3.33	(1.88 - 5.9)	3.69589e-05
SLIRP	3.33	(1.77 - 6.26)	0.000186463
DEFB130A	3.32	(0.46 - 24.13)	0.235894
DEFB130B	3.32	(0.46 - 24.13)	0.235894
ESCO2	3.32	(1.86 - 5.95)	5.39816e-05
FANCM	3.32	(1.84 - 6)	7.15961e-05
BAZ1A	3.31	(1.85 - 5.91)	5.20055e-05
OR8B3	3.3	(0.79 - 13.72)	0.101357
SAPCD2	3.3	(1.77 - 6.17)	0.000177989
TMA16	3.3	(1.8 - 6.05)	0.000112723
HK2	3.29	(1.71 - 6.32)	0.000351083
RANBP1	3.29	(1.76 - 6.18)	0.00020416
NAA15	3.27	(1.76 - 6.07)	0.000176324
CCT5	3.26	(1.84 - 5.78)	5.39019e-05
GARIN3	3.26	(0.44 - 23.87)	0.244956
OR10A3	3.26	(0.43 - 24.93)	0.255728
RFC4	3.26	(1.76 - 6.03)	0.000162725
RPS13	3.26	(1.73 - 6.15)	0.000269934
HILPDA	3.25	(1.7 - 6.21)	0.000353523
HSPD1	3.25	(1.86 - 5.69)	3.55208e-05
MRPL9	3.25	(1.68 - 6.3)	0.000478254
OR4C15	3.25	(0.8 - 13.28)	0.100599
PDHA1	3.25	(1.61 - 6.55)	0.00102253
DBF4	3.24	(1.83 - 5.75)	5.54975e-05
POLD2	3.24	(1.74 - 6.03)	0.000201722
SPRR2D	3.24	(1.17 - 8.99)	0.0236605
CENPW	3.23	(1.86 - 5.58)	2.85653e-05
NCAPH	3.23	(1.78 - 5.84)	0.000113255
AIMP1	3.22	(1.8 - 5.76)	8.10974e-05
SLC16A1	3.22	(1.7 - 6.1)	0.00032613
ATP5ME	3.21	(1.69 - 6.1)	0.000375446
CPSF3	3.21	(1.75 - 5.89)	0.000167291
PRPF4	3.21	(1.91 - 5.39)	1.07884e-05
ASPM	3.2	(1.8 - 5.67)	7.25394e-05
CKAP2L	3.2	(1.92 - 5.35)	8.40295e-06
PMCH	3.2	(1.88 - 5.46)	1.86174e-05
PPAT	3.2	(1.78 - 5.74)	9.68831e-05
WDHD1	3.2	(1.77 - 5.8)	0.000122043
BUB1B	3.19	(1.8 - 5.65)	7.27845e-05
DEPDC1B	3.19	(1.75 - 5.8)	0.000142948
NUDCD2	3.19	(1.75 - 5.82)	0.000160401
ANLN	3.18	(1.92 - 5.26)	6.91906e-06
CDT1	3.18	(1.68 - 6)	0.000375918
CEP128	3.18	(1.79 - 5.64)	7.66704e-05
MRPS34	3.18	(1.62 - 6.24)	0.000803707
MRPL18	3.17	(1.81 - 5.56)	5.77105e-05
NOL10	3.17	(1.82 - 5.53)	4.85545e-05
PBK	3.17	(1.83 - 5.5)	3.94541e-05
SLC30A9	3.17	(1.89 - 5.31)	1.25413e-05
ANP32B	3.16	(1.75 - 5.7)	0.000132603
BRCA2	3.16	(1.8 - 5.53)	5.81366e-05
FANCB	3.16	(1.69 - 5.94)	0.000332818
HSPE1	3.16	(1.78 - 5.61)	8.68178e-05
UBA2	3.16	(1.71 - 5.81)	0.000224448
SLC25A39	3.15	(1.69 - 5.84)	0.000289322
HAPLN4	3.14	(1.6 - 6.17)	0.000891223
NCAPG	3.14	(1.79 - 5.51)	6.44982e-05
RDH14	3.14	(1.89 - 5.22)	1.02091e-05
SSB	3.14	(1.93 - 5.11)	3.92863e-06
CCDC34	3.13	(1.68 - 5.82)	0.000313148
CHEK1	3.13	(1.79 - 5.46)	6.28332e-05
CYB5R4	3.13	(1.95 - 5.01)	2.07448e-06
ELOVL6	3.13	(1.75 - 5.6)	0.000127104
OR5W2	3.13	(1.26 - 7.78)	0.0142735
ERN2	3.12	(1.86 - 5.21)	1.49196e-05
FANCI	3.12	(1.76 - 5.53)	9.53719e-05
HJURP	3.12	(1.74 - 5.6)	0.000133032
OR13C3	3.12	(1.25 - 7.79)	0.0149391
SNRPD2	3.12	(1.56 - 6.23)	0.00123594
FBXO5	3.11	(1.78 - 5.46)	7.18719e-05
METTL14	3.11	(1.72 - 5.63)	0.000173304
OR6N1	3.11	(0.97 - 9.92)	0.0557283
PLK1	3.11	(1.7 - 5.7)	0.000232963
RUVBL1	3.11	(1.58 - 6.12)	0.00100444
TAS2R16	3.1	(0.75 - 12.84)	0.11931
CHEK2	3.09	(1.66 - 5.74)	0.000366257
SYAP1	3.09	(1.79 - 5.32)	4.78318e-05
HAUS8	3.08	(1.7 - 5.56)	0.000195706
LRRC59	3.08	(1.59 - 5.99)	0.000895652
PRR11	3.08	(1.74 - 5.46)	0.000121026
SPANXN3	3.08	(1.46 - 6.47)	0.00303425
POP7	3.07	(1.6 - 5.9)	0.000746172
TRA2B	3.07	(1.69 - 5.59)	0.000235626
CDK4	3.06	(1.6 - 5.85)	0.000752748
JPH1	3.06	(1.68 - 5.58)	0.000265479
SCGB2A2	3.06	(0.95 - 9.82)	0.0599979
UMOD	3.06	(1.89 - 4.95)	5.4864e-06
MACROH2A1	3.05	(1.79 - 5.2)	4.4009e-05
METTL13	3.05	(1.57 - 5.93)	0.00102128
RBBP7	3.05	(1.62 - 5.74)	0.000570211
ALG3	3.04	(1.54 - 6)	0.00132515
MRPL47	3.04	(1.76 - 5.26)	6.37492e-05
MYOZ3	3.04	(1.56 - 5.91)	0.00107385
NEDD1	3.04	(1.85 - 4.99)	1.12344e-05
SET	3.04	(1.73 - 5.36)	0.000117308
STAMBP	3.04	(1.78 - 5.18)	4.46462e-05
USP39	3.04	(1.76 - 5.26)	7.23953e-05
ZNF22	3.04	(1.74 - 5.34)	0.000103274
ECT2	3.03	(1.69 - 5.44)	0.000190063
MTFP1	3.03	(1.7 - 5.41)	0.000180919
SMC6	3.03	(1.96 - 4.69)	5.89919e-07
TRMT6	3.03	(1.8 - 5.11)	2.97292e-05
GEMIN6	3.02	(1.64 - 5.56)	0.00037678
HNRNPM	3.02	(1.63 - 5.62)	0.000474641
POC1A	3.02	(1.72 - 5.32)	0.000129278
SMARCA5	3.02	(1.81 - 5.03)	2.19274e-05
TMEM33	3.02	(1.74 - 5.22)	7.76139e-05
CCDC124	3.01	(1.72 - 5.29)	0.000119736
GART	3.01	(1.58 - 5.73)	0.000769548
NUP35	3.01	(1.75 - 5.19)	6.77179e-05
PIGA	3.01	(1.73 - 5.24)	0.000101347
POLR2D	3.01	(1.8 - 5.05)	2.80083e-05
SSBP1	3.01	(1.68 - 5.4)	0.000227417
TMEM97	3.01	(1.7 - 5.35)	0.000167048
TOMM5	3.01	(1.57 - 5.78)	0.000910271
ZNF492	3.01	(1.69 - 5.36)	0.000186288
MGME1	3	(1.75 - 5.14)	6.84878e-05
MPV17L2	3	(1.88 - 4.78)	3.88335e-06
TYMS	3	(1.61 - 5.58)	0.000543917
APTX	2.99	(1.89 - 4.74)	3.00344e-06
ATP6V1C2	2.99	(1.75 - 5.1)	5.92813e-05
C19orf53	2.99	(1.51 - 5.93)	0.00166473
MRPL50	2.99	(1.71 - 5.23)	0.000124529
PRM1	2.99	(1.35 - 6.65)	0.00713906
PCLAF	2.98	(1.63 - 5.47)	0.000407021
TSEN15	2.98	(1.8 - 4.94)	2.15206e-05
CDK2AP1	2.97	(1.76 - 5.01)	4.31858e-05
NELFA	2.97	(1.59 - 5.57)	0.000660996
UFSP2	2.97	(1.74 - 5.08)	6.37818e-05
FEM1A	2.96	(1.61 - 5.43)	0.000474741
NME2	2.96	(1.54 - 5.71)	0.00119859
NUSAP1	2.96	(1.73 - 5.07)	8.00672e-05
OR10H1	2.96	(1.15 - 7.62)	0.0240985
ZNF567	2.96	(1.8 - 4.87)	1.76631e-05
ATIC	2.95	(1.63 - 5.34)	0.000354336
EIF2B2	2.95	(1.58 - 5.53)	0.000727087
HMGB2	2.95	(1.6 - 5.42)	0.000521874
NPM3	2.95	(1.57 - 5.52)	0.000724567
RAD51	2.95	(1.64 - 5.29)	0.000296327
UTP14A	2.95	(1.54 - 5.65)	0.00111182
DEPDC1	2.94	(1.77 - 4.88)	2.87529e-05
IDH2	2.94	(1.65 - 5.26)	0.000269586
KHSRP	2.94	(1.7 - 5.09)	0.000118435
MRPL52	2.94	(1.56 - 5.55)	0.000897011
TAAR9	2.94	(1.34 - 6.49)	0.00737357
ACAA2	2.93	(1.71 - 5.02)	8.54638e-05
EMC8	2.93	(1.67 - 5.16)	0.000183053
FADS1	2.93	(1.61 - 5.34)	0.000450401
PRORP	2.93	(1.61 - 5.33)	0.000415261
SLC39A3	2.93	(1.63 - 5.29)	0.000350133
ADH5	2.92	(1.75 - 4.85)	3.7215e-05
ASPDH	2.92	(1.58 - 5.4)	0.000599717
DKC1	2.92	(1.34 - 6.35)	0.00676424
MTFR2	2.92	(1.68 - 5.06)	0.000141767
NSD2	2.92	(1.65 - 5.18)	0.000245805
DHX15	2.91	(1.67 - 5.06)	0.000157566
KARS1	2.91	(1.56 - 5.43)	0.000824343
THAP9	2.91	(1.63 - 5.2)	0.000319742
GEN1	2.9	(1.71 - 4.94)	8.52193e-05
RAD51C	2.9	(1.73 - 4.87)	5.31895e-05
TRIP13	2.9	(1.56 - 5.38)	0.000745492
EIF5B	2.89	(1.8 - 4.66)	1.19354e-05
RARS1	2.89	(1.68 - 4.97)	0.00012988
SPATA5	2.89	(1.65 - 5.07)	0.000216384
TECR	2.89	(1.61 - 5.2)	0.000391422
CMSS1	2.88	(1.62 - 5.11)	0.000318965
ENDOG	2.88	(1.61 - 5.16)	0.000372687
MCM8	2.88	(1.75 - 4.74)	2.99374e-05
TRIAP1	2.88	(1.45 - 5.72)	0.00261125
ARL6IP1	2.86	(1.77 - 4.61)	1.82272e-05
DNAAF2	2.86	(1.56 - 5.24)	0.000692279
KIF23	2.86	(1.67 - 4.91)	0.000126782
MSH2	2.86	(1.79 - 4.55)	9.59169e-06
PDIA6	2.86	(1.63 - 5.03)	0.000245669
SKA1	2.86	(1.66 - 4.95)	0.000168408
BUB3	2.85	(1.76 - 4.62)	2.11926e-05
CACYBP	2.85	(1.73 - 4.71)	4.31009e-05
CDC25A	2.85	(1.58 - 5.14)	0.00048692
GUF1	2.85	(1.67 - 4.88)	0.000130953
CEBPZ	2.84	(1.7 - 4.74)	6.23454e-05
RPS7	2.84	(1.58 - 5.1)	0.000458544
SMNDC1	2.84	(1.75 - 4.6)	2.29851e-05
TBC1D31	2.84	(1.8 - 4.48)	7.40092e-06
ETAA1	2.83	(1.8 - 4.46)	7.02239e-06
OR11G2	2.83	(0.68 - 11.77)	0.152997
PSAT1	2.83	(1.64 - 4.88)	0.000187788
SAC3D1	2.83	(1.54 - 5.21)	0.000823907
ACBD7	2.82	(1.75 - 4.54)	2.19772e-05
HNRNPAB	2.82	(1.54 - 5.17)	0.000795905
NUDT1	2.82	(1.67 - 4.76)	0.000108349
ZMYND19	2.82	(1.57 - 5.07)	0.000544091
CHCHD3	2.81	(1.66 - 4.77)	0.000125675
DTYMK	2.81	(1.62 - 4.86)	0.00022992
GTF3C3	2.81	(1.63 - 4.84)	0.000193647
IQGAP3	2.81	(1.71 - 4.62)	4.96115e-05
KIF14	2.81	(1.69 - 4.68)	6.56405e-05
KPNA2	2.81	(1.66 - 4.75)	0.00011458
PSMC4	2.81	(1.75 - 4.51)	1.97721e-05
WDR43	2.81	(1.6 - 4.95)	0.000346168
ZRANB3	2.81	(1.71 - 4.63)	4.91951e-05
BRIP1	2.8	(1.57 - 4.99)	0.000512642
CDC6	2.8	(1.68 - 4.67)	8.15954e-05
E2F3	2.8	(1.49 - 5.25)	0.00130568
MTHFD2L	2.8	(1.55 - 5.06)	0.00064039
OR5H2	2.8	(0.68 - 11.58)	0.154727
RHNO1	2.8	(1.55 - 5.06)	0.000654892
RUVBL2	2.8	(1.5 - 5.21)	0.00115409
SRP54	2.8	(1.75 - 4.5)	1.92262e-05
ATRAID	2.79	(1.72 - 4.5)	2.82306e-05
ELOF1	2.79	(1.49 - 5.22)	0.00138159
GATAD2A	2.79	(1.61 - 4.84)	0.000249945
GGH	2.79	(1.75 - 4.44)	1.58513e-05
MTX1	2.79	(1.48 - 5.25)	0.00149187
OR10J1	2.79	(0.67 - 11.58)	0.157834
RAD54L	2.79	(1.75 - 4.44)	1.55826e-05
TAF7	2.79	(1.51 - 5.15)	0.00100291
HCCS	2.78	(1.67 - 4.63)	8.92909e-05
LARP7	2.78	(1.63 - 4.75)	0.000186563
MTHFD2	2.78	(1.59 - 4.84)	0.000311043
SLC1A5	2.78	(1.49 - 5.19)	0.0013575
UAP1	2.78	(1.74 - 4.43)	1.74838e-05
G3BP1	2.77	(1.61 - 4.75)	0.000221383
CCT3	2.76	(1.54 - 4.96)	0.000689667
IPO4	2.76	(1.47 - 5.19)	0.00159607
NOP10	2.76	(1.63 - 4.69)	0.000170269
ZNF850	2.76	(1.48 - 5.12)	0.00134956
AIMP2	2.75	(1.59 - 4.75)	0.000294493
ANP32A	2.75	(1.61 - 4.7)	0.000217517
MRPS2	2.75	(1.52 - 4.97)	0.000829159
NIP7	2.75	(1.44 - 5.25)	0.00209167
PACRGL	2.75	(1.6 - 4.73)	0.000244854
PGK1	2.75	(1.47 - 5.11)	0.00145655
SRSF3	2.75	(1.59 - 4.76)	0.000304859
DCTPP1	2.74	(1.4 - 5.38)	0.00340562
H2BC1	2.74	(0.66 - 11.36)	0.16483
POLE2	2.74	(1.52 - 4.94)	0.000839731
PPP2R3C	2.74	(1.68 - 4.48)	5.78585e-05
SCFD2	2.74	(1.47 - 5.11)	0.00148658
SHQ1	2.74	(1.49 - 5.03)	0.00121573
SMC4	2.74	(1.61 - 4.66)	0.000192058
TRIM59	2.74	(1.54 - 4.87)	0.000580297
ZNF219	2.74	(1.52 - 4.95)	0.000806937
COX7B	2.73	(1.46 - 5.08)	0.00157417
CYB5B	2.73	(1.72 - 4.35)	2.17336e-05
NUP107	2.73	(1.65 - 4.53)	0.000100683
PRELID1	2.73	(1.45 - 5.15)	0.00194113
SMPDL3B	2.73	(1.52 - 4.9)	0.000758464
CSTF2	2.72	(1.64 - 4.51)	0.000101829
FDFT1	2.72	(1.7 - 4.34)	2.92019e-05
PLRG1	2.72	(1.57 - 4.73)	0.00036704
PRAC1	2.72	(0.37 - 19.93)	0.324275
RNASE11	2.72	(0.37 - 19.93)	0.32609
SF3B6	2.72	(1.65 - 4.47)	8.33845e-05
TMX2	2.72	(1.58 - 4.69)	0.000298128
ASF1B	2.71	(1.56 - 4.68)	0.000369464
CCNE1	2.71	(1.55 - 4.75)	0.000488897
CDC123	2.71	(1.66 - 4.43)	7.25296e-05
CENPK	2.71	(1.6 - 4.58)	0.000207629
DNAH14	2.71	(1.54 - 4.77)	0.000568835
DUT	2.71	(1.58 - 4.67)	0.000318559
ILF2	2.71	(1.52 - 4.85)	0.000772276
KIF15	2.71	(1.54 - 4.75)	0.000513405
RPL22L1	2.71	(1.46 - 5.06)	0.00167888
TMCO1	2.71	(1.68 - 4.39)	4.56337e-05
FAM166A	2.7	(1.66 - 4.38)	5.79919e-05
MAP2K2	2.7	(1.5 - 4.85)	0.000954312
MRPL13	2.7	(1.7 - 4.3)	2.82435e-05
OR10C1	2.7	(0.37 - 19.8)	0.327406
PRKDC	2.7	(1.58 - 4.62)	0.000275797
PSMB4	2.7	(1.54 - 4.73)	0.000514417
TEX30	2.7	(1.71 - 4.26)	1.88503e-05
ALMS1	2.69	(1.51 - 4.77)	0.000739264
BLM	2.69	(1.53 - 4.73)	0.000566814
CLPTM1L	2.69	(1.59 - 4.55)	0.000219532
NDUFS8	2.69	(1.48 - 4.87)	0.00111168
UQCR11	2.69	(1.59 - 4.56)	0.000239029
LSM5	2.68	(1.55 - 4.66)	0.000455852
MRPL33	2.68	(1.54 - 4.68)	0.000501485
PSMC3	2.68	(1.51 - 4.76)	0.000773132
RAB33A	2.68	(1.4 - 5.12)	0.0028092
TRMT112	2.68	(1.33 - 5.4)	0.00576375
VMA21	2.68	(1.43 - 5.02)	0.00216242
IKBIP	2.67	(1.57 - 4.52)	0.00027309
NOP58	2.67	(1.58 - 4.5)	0.000224112
OR6C68	2.67	(0.83 - 8.61)	0.0998371
ZNHIT2	2.67	(1.58 - 4.5)	0.000245644
CCDC18	2.66	(1.75 - 4.03)	4.72071e-06
DDX39A	2.66	(1.41 - 5)	0.00240934
IARS1	2.66	(1.55 - 4.57)	0.000395429
IPO7	2.66	(1.51 - 4.66)	0.000656802
KBTBD8	2.66	(1.65 - 4.27)	5.54079e-05
KNSTRN	2.66	(1.53 - 4.6)	0.000486124
OIP5	2.66	(1.54 - 4.6)	0.000464528
PRPF40A	2.66	(1.68 - 4.19)	2.78818e-05
CCT8	2.65	(1.5 - 4.65)	0.000729342
KEAP1	2.65	(1.46 - 4.81)	0.00140631
MTCH2	2.65	(1.59 - 4.43)	0.000187503
OR5A1	2.65	(0.64 - 10.97)	0.17774
PHKB	2.65	(1.71 - 4.1)	1.22472e-05
PRMT1	2.65	(1.46 - 4.8)	0.00131712
PTMA	2.65	(1.55 - 4.53)	0.000382
SOCS4	2.65	(1.55 - 4.55)	0.000386985
SRSF7	2.65	(1.65 - 4.27)	6.12647e-05
ZNF239	2.65	(1.48 - 4.75)	0.00105248
ZNF626	2.65	(1.59 - 4.41)	0.000177434
DAZAP1	2.64	(1.5 - 4.67)	0.000817739
GNPDA2	2.64	(1.53 - 4.54)	0.000454367
MCM2	2.64	(1.38 - 5.07)	0.00343438
POLA2	2.64	(1.36 - 5.12)	0.00420253
TUBB4B	2.64	(1.64 - 4.23)	5.79758e-05
AHCY	2.63	(1.42 - 4.88)	0.00211885
CHCHD1	2.63	(1.6 - 4.35)	0.000152031
FAM32A	2.63	(1.69 - 4.11)	1.97267e-05
GEMIN7	2.63	(1.55 - 4.45)	0.000328135
MRPL58	2.63	(1.39 - 4.97)	0.0029553
SAE1	2.63	(1.52 - 4.56)	0.000569867
SMC2	2.63	(1.64 - 4.21)	5.67584e-05
USP38	2.63	(1.65 - 4.19)	4.85108e-05
ZNF829	2.63	(1.55 - 4.46)	0.000349081
CENPL	2.62	(1.53 - 4.47)	0.000429935
HNRNPR	2.62	(1.7 - 4.04)	1.27432e-05
NME1	2.62	(1.32 - 5.18)	0.00584174
NUDT6	2.62	(1.54 - 4.44)	0.000354941
RPA3	2.62	(1.61 - 4.27)	0.000113002
SPC24	2.62	(1.47 - 4.68)	0.00107411
TALDO1	2.62	(1.51 - 4.54)	0.000602482
UQCRQ	2.62	(1.49 - 4.6)	0.000816341
ZNF90	2.62	(1.46 - 4.68)	0.00117256
MRPL36	2.61	(1.48 - 4.61)	0.000954766
NXT2	2.61	(1.52 - 4.48)	0.000488514
SPDL1	2.61	(1.61 - 4.22)	9.63152e-05
TOPBP1	2.61	(1.58 - 4.32)	0.000189237
ASB3	2.6	(1.64 - 4.13)	5.20682e-05
CKAP5	2.6	(1.56 - 4.35)	0.000253383
HAUS3	2.6	(1.46 - 4.64)	0.00120611
CEP152	2.59	(1.48 - 4.52)	0.000821208
DESI2	2.59	(1.6 - 4.21)	0.000112716
EIF4E	2.59	(1.54 - 4.37)	0.000357326
KIF24	2.59	(1.53 - 4.39)	0.000404496
LBHD1	2.59	(1.48 - 4.52)	0.000863886
PRXL2A	2.59	(1.53 - 4.4)	0.000428426
UBE2K	2.59	(1.6 - 4.21)	0.000114226
UNG	2.59	(1.37 - 4.88)	0.00327608
ZBTB9	2.59	(1.55 - 4.33)	0.000268924
MAGEB18	2.58	(1.39 - 4.77)	0.00254363
NOLC1	2.58	(1.62 - 4.13)	7.18411e-05
RFWD3	2.58	(1.38 - 4.8)	0.00283785
TMEM251	2.58	(1.43 - 4.64)	0.00156682
TXNDC9	2.58	(1.69 - 3.96)	1.25317e-05
CEBPG	2.57	(1.5 - 4.42)	0.000606978
INTS12	2.57	(1.45 - 4.57)	0.0012743
NOPCHAP1	2.57	(1.4 - 4.73)	0.00242982
OR4A47	2.57	(0.35 - 18.72)	0.352705
PARD6A	2.57	(1.62 - 4.08)	5.69663e-05
PSMD8	2.57	(1.55 - 4.27)	0.000260204
SNRNP25	2.57	(1.54 - 4.27)	0.000286201
TIMM23	2.57	(1.55 - 4.27)	0.00023908
ADNP2	2.56	(1.52 - 4.32)	0.000415343
LSM7	2.56	(1.43 - 4.56)	0.00147846
MAGEB10	2.56	(1.34 - 4.91)	0.00463947
MYBL2	2.56	(1.44 - 4.55)	0.00136584
PCNX4	2.56	(1.55 - 4.24)	0.000254675
RAN	2.56	(1.33 - 4.91)	0.00465727
SUPT16H	2.56	(1.41 - 4.64)	0.00199338
TOP2A	2.56	(1.6 - 4.12)	9.97385e-05
URI1	2.56	(1.52 - 4.31)	0.000414961
ADO	2.55	(1.47 - 4.42)	0.000894974
C1orf43	2.55	(1.41 - 4.63)	0.00202364
CBR1	2.55	(1.47 - 4.43)	0.000891806
CIAO2A	2.55	(1.52 - 4.29)	0.000387005
CKAP2	2.55	(1.57 - 4.15)	0.000160508
CSRP2	2.55	(1.57 - 4.13)	0.00015113
DIAPH3	2.55	(1.53 - 4.25)	0.000338454
FAM47A	2.55	(1.15 - 5.63)	0.0210217
LRBA	2.55	(1.45 - 4.48)	0.00119548
PI4K2B	2.55	(1.67 - 3.89)	1.4828e-05
SLIT3	2.55	(1.63 - 3.98)	4.137e-05
TCEAL8	2.55	(1.41 - 4.61)	0.00188552
VBP1	2.55	(1.51 - 4.31)	0.000480619
ADIPOR1	2.54	(1.53 - 4.2)	0.000313529
CDCA3	2.54	(1.56 - 4.15)	0.000184702
CKLF	2.54	(1.62 - 3.96)	4.38985e-05
GNPNAT1	2.54	(1.43 - 4.51)	0.00145728
HSPA14	2.54	(1.43 - 4.52)	0.00144947
KIFC1	2.54	(1.49 - 4.31)	0.000568331
KNOP1	2.54	(1.46 - 4.44)	0.00103629
MCM4	2.54	(1.42 - 4.52)	0.00156975
METAP2	2.54	(1.48 - 4.37)	0.000721123
NANP	2.54	(1.52 - 4.22)	0.00033976
SSNA1	2.54	(1.51 - 4.27)	0.000416659
TMEM258	2.54	(1.38 - 4.68)	0.0027654
TST	2.54	(1.45 - 4.42)	0.00104247
EEF1E1	2.53	(1.54 - 4.15)	0.000244135
EMD	2.53	(1.46 - 4.38)	0.000929809
EME1	2.53	(1.46 - 4.37)	0.000922011
G2E3	2.53	(1.53 - 4.19)	0.000293901
MAPKAP1	2.53	(1.59 - 4.02)	9.5559e-05
OSCP1	2.53	(1.4 - 4.58)	0.00219088
SEPHS1	2.53	(1.59 - 4.02)	8.32088e-05
TCTN3	2.53	(1.49 - 4.28)	0.000558717
BOLA3	2.52	(1.55 - 4.08)	0.000184613
BSG	2.52	(1.5 - 4.24)	0.000475277
CHAC2	2.52	(1.46 - 4.36)	0.000922346
MRPS12	2.52	(1.33 - 4.77)	0.00461321
NFXL1	2.52	(1.41 - 4.52)	0.00187339
NMS	2.52	(1.01 - 6.27)	0.0465578
PAK4	2.52	(1.42 - 4.49)	0.00164907
SNRPA	2.52	(1.4 - 4.53)	0.00205467
WDR76	2.52	(1.48 - 4.28)	0.000614577
ZNF93	2.52	(1.48 - 4.3)	0.000714823
CCT7	2.51	(1.44 - 4.38)	0.00120602
ERCC4	2.51	(1.62 - 3.9)	4.00913e-05
FARSA	2.51	(1.36 - 4.64)	0.00330475
GINS2	2.51	(1.34 - 4.68)	0.00391627
MIS18BP1	2.51	(1.43 - 4.39)	0.00128261
PHACTR3	2.51	(1.47 - 4.29)	0.000789997
RBMXL1	2.51	(1.43 - 4.42)	0.00137685
SFXN4	2.51	(1.4 - 4.5)	0.00206444
SKA3	2.51	(1.48 - 4.24)	0.000621102
TEX33	2.51	(0.34 - 18.64)	0.368192
ATAD2	2.5	(1.49 - 4.17)	0.000483916
CBX3	2.5	(1.51 - 4.13)	0.000358261
DNAAF5	2.5	(1.48 - 4.2)	0.000576421
LIN9	2.5	(1.52 - 4.11)	0.000311873
NDUFB11	2.5	(1.36 - 4.58)	0.00306705
SAP30	2.5	(1.39 - 4.47)	0.00206164
U2AF1	2.5	(1.38 - 4.52)	0.00244353
ATG4D	2.49	(1.49 - 4.16)	0.000506023
AUNIP	2.49	(1.59 - 3.91)	6.95865e-05
CEP78	2.49	(1.48 - 4.19)	0.000553216
ERO1A	2.49	(1.64 - 3.78)	1.98986e-05
GRWD1	2.49	(1.37 - 4.53)	0.00290286
OR12D3	2.49	(0.59 - 10.55)	0.215239
PA2G4	2.49	(1.42 - 4.37)	0.00137721
PGAM5	2.49	(1.45 - 4.3)	0.00100947
RFC1	2.49	(1.53 - 4.05)	0.000254333
RFC3	2.49	(1.47 - 4.21)	0.000711103
UQCRFS1	2.49	(1.34 - 4.65)	0.00402604
DDIAS	2.48	(1.49 - 4.13)	0.000509711
EIF3M	2.48	(1.37 - 4.48)	0.00269341
HAT1	2.48	(1.64 - 3.75)	1.63087e-05
MRPL51	2.48	(1.34 - 4.57)	0.00366905
NONO	2.48	(1.31 - 4.72)	0.00553602
OR4F15	2.48	(0.9 - 6.83)	0.0794797
SNRPB2	2.48	(1.44 - 4.27)	0.00104467
DARS1	2.47	(1.55 - 3.94)	0.000142013
DNAJC9	2.47	(1.48 - 4.12)	0.000524086
MCCC1	2.47	(1.48 - 4.1)	0.000514912
MED27	2.47	(1.57 - 3.91)	0.000100153
NDUFB5	2.47	(1.49 - 4.11)	0.000474992
TOMM34	2.47	(1.62 - 3.77)	2.4147e-05
BAX	2.46	(1.37 - 4.43)	0.00258506
C9orf78	2.46	(1.62 - 3.74)	2.37848e-05
CDC34	2.46	(1.6 - 3.8)	4.3618e-05
DNTTIP1	2.46	(1.5 - 4.04)	0.00038596
ENTREP3	2.46	(1.46 - 4.14)	0.000700433
FSCB	2.46	(1.53 - 3.94)	0.000187763
MSH6	2.46	(1.4 - 4.33)	0.00171359
PALB2	2.46	(1.43 - 4.21)	0.00107438
AURKB	2.45	(1.45 - 4.13)	0.000834495
EIF3G	2.45	(1.35 - 4.47)	0.00335975
PTBP1	2.45	(1.41 - 4.24)	0.00143428
RPL27A	2.45	(1.32 - 4.55)	0.00459859
SPATA5L1	2.45	(1.46 - 4.09)	0.000643137
TRMT10C	2.45	(1.36 - 4.39)	0.00271725
UQCC3	2.45	(1.23 - 4.87)	0.0106298
CCDC150	2.44	(1.48 - 4.02)	0.000483508
DDX21	2.44	(1.46 - 4.06)	0.000617371
DTD2	2.44	(1.47 - 4.05)	0.000576742
FAM111B	2.44	(1.5 - 3.95)	0.000317811
PPIL1	2.44	(1.45 - 4.09)	0.000741217
PRDX4	2.44	(1.27 - 4.71)	0.0077295
RIDA	2.44	(1.45 - 4.09)	0.000753984
TIMM17A	2.44	(1.52 - 3.91)	0.000225935
DNAJA1	2.43	(1.59 - 3.7)	3.74451e-05
EXOC5	2.43	(1.53 - 3.85)	0.000152025
FIP1L1	2.43	(1.43 - 4.14)	0.00106936
GMNN	2.43	(1.4 - 4.21)	0.0016034
GSKIP	2.43	(1.55 - 3.79)	0.000104391
KNL1	2.43	(1.46 - 4.04)	0.000603742
LMNB1	2.43	(1.42 - 4.18)	0.00127805
METTL5	2.43	(1.45 - 4.07)	0.000733256
MTHFD1	2.43	(1.34 - 4.4)	0.00344921
PRPS1	2.43	(1.3 - 4.56)	0.0055484
SGTA	2.43	(1.49 - 3.95)	0.000361647
SLC30A6	2.43	(1.58 - 3.74)	4.92839e-05
TMEM177	2.43	(1.51 - 3.9)	0.000246928
TMEM185B	2.43	(1.53 - 3.87)	0.000161615
APEX1	2.42	(1.27 - 4.6)	0.00702405
ENPP4	2.42	(1.58 - 3.7)	4.88153e-05
GPN1	2.42	(1.58 - 3.72)	4.95406e-05
OLIG3	2.42	(0.97 - 6)	0.0569265
OR14C36	2.42	(0.57 - 10.3)	0.232147
OR8U8	2.42	(0.33 - 17.64)	0.382468
SRSF2	2.42	(1.45 - 4.05)	0.000700742
STRBP	2.42	(1.32 - 4.45)	0.00437788
ESCO1	2.41	(1.58 - 3.67)	3.96499e-05
GNAI3	2.41	(1.56 - 3.73)	7.51193e-05
LSM14A	2.41	(1.4 - 4.14)	0.00141286
OR5D18	2.41	(0.32 - 17.95)	0.392188
PPP1R15B	2.41	(1.48 - 3.92)	0.000398441
VGF	2.41	(1.36 - 4.28)	0.00265568
WDR62	2.41	(1.41 - 4.1)	0.00122637
DAP3	2.4	(1.43 - 4.04)	0.000933299
DHX9	2.4	(1.38 - 4.17)	0.00193231
MSMO1	2.4	(1.51 - 3.8)	0.000205575
PRDX6	2.4	(1.37 - 4.19)	0.00216284
RACGAP1	2.4	(1.43 - 4.01)	0.000875657
TRIR	2.4	(1.31 - 4.4)	0.00446319
BYSL	2.39	(1.31 - 4.37)	0.00464032
C12orf29	2.39	(1.46 - 3.93)	0.000581829
CHTF8	2.39	(1.42 - 4.03)	0.00108456
CLSPN	2.39	(1.55 - 3.68)	7.63767e-05
CSTF1	2.39	(1.3 - 4.39)	0.00522786
DCAF12	2.39	(1.55 - 3.68)	7.45643e-05
EXOC1	2.39	(1.54 - 3.71)	0.0001022
FAM104B	2.39	(1.41 - 4.06)	0.0012426
KIF2C	2.39	(1.52 - 3.76)	0.000176366
PRMT3	2.39	(1.32 - 4.33)	0.00386158
RAB28	2.39	(1.52 - 3.76)	0.000165562
SLC6A11	2.39	(1.28 - 4.45)	0.00596111
SUN5	2.39	(1.04 - 5.49)	0.040961
WDR53	2.39	(1.42 - 4.03)	0.00106447
BAG2	2.38	(1.56 - 3.64)	5.6717e-05
CITED1	2.38	(1.45 - 3.91)	0.000607533
CLINT1	2.38	(1.58 - 3.56)	2.83715e-05
HNRNPA2B1	2.38	(1.55 - 3.65)	7.16224e-05
MRPL23	2.38	(1.27 - 4.47)	0.00699703
OSTC	2.38	(1.32 - 4.3)	0.00411131
RBM38	2.38	(1.43 - 3.95)	0.000855432
RFXANK	2.38	(1.28 - 4.44)	0.00627153
SCD	2.38	(1.42 - 3.98)	0.000965486
SFXN1	2.38	(1.55 - 3.67)	7.99506e-05
CCNJ	2.37	(1.46 - 3.84)	0.00046088
CDCA7	2.37	(1.33 - 4.23)	0.00346342
DCLRE1A	2.37	(1.54 - 3.64)	8.39021e-05
FERMT1	2.37	(1.4 - 4.02)	0.00131877
GSTCD	2.37	(1.4 - 4.02)	0.00129945
PIGX	2.37	(1.51 - 3.7)	0.000158911
POLR2I	2.37	(1.3 - 4.3)	0.00463256
SLC25A15	2.37	(1.43 - 3.94)	0.000882099
URB2	2.37	(1.32 - 4.26)	0.00391394
ZNF443	2.37	(1.34 - 4.19)	0.00291041
CCDC59	2.36	(1.33 - 4.19)	0.0031997
DARS2	2.36	(1.39 - 4.02)	0.00151705
GTF3C2	2.36	(1.46 - 3.8)	0.000438132
INCENP	2.36	(1.38 - 4.02)	0.00169135
ISOC1	2.36	(1.52 - 3.66)	0.00013829
MGAT2	2.36	(1.39 - 4)	0.00147385
MPST	2.36	(1.34 - 4.16)	0.00288281
MRPL30	2.36	(1.42 - 3.92)	0.000950278
NCL	2.36	(1.4 - 4)	0.0013213
NDUFAB1	2.36	(1.28 - 4.35)	0.00592736
NTPCR	2.36	(1.5 - 3.73)	0.000228216
PRLHR	2.36	(1.51 - 3.71)	0.000178914
RPS15	2.36	(1.37 - 4.09)	0.00209815
RPS17	2.36	(1.35 - 4.13)	0.00246933
TEDC1	2.36	(1.44 - 3.86)	0.000648407
ARHGAP11B	2.35	(1.42 - 3.88)	0.000850859
BTF3	2.35	(1.33 - 4.13)	0.00307502
DMRTB1	2.35	(1.16 - 4.77)	0.0176199
EEF2	2.35	(1.39 - 3.95)	0.00131142
HNRNPA1	2.35	(1.33 - 4.15)	0.00309594
MKI67	2.35	(1.42 - 3.88)	0.000827066
NAA10	2.35	(1.38 - 3.98)	0.00154695
NUDT21	2.35	(1.49 - 3.72)	0.000241728
UBL5	2.35	(1.39 - 3.96)	0.00137326
ZWINT	2.35	(1.41 - 3.92)	0.00110395
ARHGAP19	2.34	(1.49 - 3.68)	0.000227911
CHAF1A	2.34	(1.25 - 4.37)	0.00791139
CISD2	2.34	(1.35 - 4.03)	0.002354
NOA1	2.34	(1.29 - 4.27)	0.00541821
OR5T1	2.34	(0.32 - 17.04)	0.400066
PAQR3	2.34	(1.38 - 3.99)	0.00165584
PGRMC1	2.34	(1.43 - 3.85)	0.000787775
RAB3IP	2.34	(1.47 - 3.73)	0.000359646
SF3B3	2.34	(1.27 - 4.29)	0.00608821
TCF15	2.34	(1.39 - 3.93)	0.00137731
TCP1	2.34	(1.44 - 3.81)	0.000634438
TIMM21	2.34	(1.51 - 3.65)	0.000159554
AP5M1	2.33	(1.47 - 3.71)	0.000344921
CCT6A	2.33	(1.43 - 3.81)	0.000742142
CENPI	2.33	(1.34 - 4.06)	0.00283026
COP1	2.33	(1.46 - 3.73)	0.000392713
DEPDC4	2.33	(1.42 - 3.82)	0.000784609
EBLN1	2.33	(1.55 - 3.51)	4.87205e-05
EMC4	2.33	(1.36 - 4)	0.00198645
EMC9	2.33	(1.32 - 4.12)	0.00371965
FUNDC1	2.33	(1.37 - 3.94)	0.00166344
HINT1	2.33	(1.28 - 4.24)	0.00590791
KLHL25	2.33	(1.38 - 3.94)	0.00155736
LONP1	2.33	(1.31 - 4.12)	0.00384918
NAXE	2.33	(1.45 - 3.76)	0.000511112
OTULIN	2.33	(1.51 - 3.59)	0.000130481
PAQR4	2.33	(1.5 - 3.63)	0.000171365
PINX1	2.33	(1.45 - 3.74)	0.000481471
TEX10	2.33	(1.33 - 4.06)	0.00291317
MMGT1	2.32	(1.51 - 3.55)	0.000112156
RSL1D1	2.32	(1.31 - 4.11)	0.00376532
STIL	2.32	(1.5 - 3.58)	0.00015105
UBLCP1	2.32	(1.54 - 3.5)	6.15747e-05
ZWILCH	2.32	(1.48 - 3.63)	0.000241969
ENOPH1	2.31	(1.33 - 4)	0.0027906
GUCA2B	2.31	(0.83 - 6.39)	0.108334
HSPA4	2.31	(1.46 - 3.66)	0.000372874
LLPH	2.31	(1.45 - 3.7)	0.000470144
METTL18	2.31	(1.41 - 3.78)	0.000928124
PACC1	2.31	(1.43 - 3.75)	0.000635217
PPP1R14B	2.31	(1.23 - 4.34)	0.00962294
PSMD7	2.31	(1.42 - 3.75)	0.000762677
SSR2	2.31	(1.31 - 4.06)	0.00364722
TMEM165	2.31	(1.44 - 3.7)	0.000525273
TMEM203	2.31	(1.46 - 3.64)	0.000313771
ANAPC11	2.3	(1.27 - 4.18)	0.00616088
EIF2S2	2.3	(1.37 - 3.85)	0.00154561
FKBP5	2.3	(1.5 - 3.54)	0.000130777
GPN3	2.3	(1.32 - 4.01)	0.00318875
MMADHC	2.3	(1.42 - 3.72)	0.000679242
RBMX2	2.3	(1.27 - 4.19)	0.00620522
RMND5A	2.3	(1.46 - 3.64)	0.000340645
SMARCAD1	2.3	(1.43 - 3.72)	0.00065411
SVIP	2.3	(1.45 - 3.64)	0.000368682
TMEM207	2.3	(1.22 - 4.35)	0.0103771
DHODH	2.29	(1.35 - 3.87)	0.00208945
FAM136A	2.29	(1.31 - 4)	0.00352092
FTSJ1	2.29	(1.2 - 4.37)	0.0122086
MRPS21	2.29	(1.38 - 3.8)	0.00142765
RAD23A	2.29	(1.31 - 4)	0.00359455
RFC5	2.29	(1.41 - 3.72)	0.000831601
RPS3A	2.29	(1.28 - 4.11)	0.00535484
SELENOS	2.29	(1.47 - 3.58)	0.00025503
ZNF112	2.29	(1.47 - 3.56)	0.00025744
BOLA2B	2.28	(1.27 - 4.09)	0.00568677
DPY19L3	2.28	(1.33 - 3.91)	0.00269778
IWS1	2.28	(1.52 - 3.4)	5.87678e-05
LEUTX	2.28	(0.69 - 7.5)	0.176019
MAP3K15	2.28	(1.36 - 3.83)	0.00181778
METAP1	2.28	(1.27 - 4.06)	0.00542135
MRPS18C	2.28	(1.41 - 3.68)	0.000808717
NDUFA2	2.28	(1.41 - 3.68)	0.000785587
NDUFAF8	2.28	(1.18 - 4.43)	0.0146027
NOX1	2.28	(1.37 - 3.78)	0.00143998
NTHL1	2.28	(1.26 - 4.14)	0.00647796
PPM1G	2.28	(1.45 - 3.58)	0.000363429
RCC1	2.28	(1.33 - 3.92)	0.00276195
THOC6	2.28	(1.29 - 4.05)	0.00478353
TOMM40	2.28	(1.3 - 4.01)	0.00399982
TRMT1	2.28	(1.3 - 3.99)	0.0038626
BOLA2	2.27	(1.27 - 4.08)	0.00580787
CDK5RAP2	2.27	(1.48 - 3.5)	0.000186858
CIART	2.27	(1.34 - 3.82)	0.00216499
CMTR2	2.27	(1.46 - 3.53)	0.000277506
MAGEB6	2.27	(1.38 - 3.72)	0.00114917
NCAN	2.27	(1.28 - 4.02)	0.00502071
NUP93	2.27	(1.3 - 3.97)	0.0041378
PIH1D1	2.27	(1.28 - 4.04)	0.00526973
POLR2B	2.27	(1.4 - 3.67)	0.000828495
POLR2H	2.27	(1.22 - 4.21)	0.00930803
PSMD14	2.27	(1.45 - 3.55)	0.000325844
RBM34	2.27	(1.39 - 3.71)	0.00112549
RNASE9	2.27	(0.99 - 5.21)	0.0535946
TCF3	2.27	(1.32 - 3.88)	0.00283216
UGP2	2.27	(1.43 - 3.61)	0.000537857
WDR89	2.27	(1.32 - 3.9)	0.00299909
BFAR	2.26	(1.3 - 3.92)	0.00393596
CCDC85C	2.26	(1.26 - 4.08)	0.00661504
E2F8	2.26	(1.33 - 3.86)	0.00272985
EXOSC1	2.26	(1.45 - 3.51)	0.000320542
F9	2.26	(0.87 - 5.82)	0.0927239
GON7	2.26	(1.38 - 3.69)	0.00120516
MBD3L5	2.26	(1.06 - 4.83)	0.0353974
NDUFB10	2.26	(1.28 - 4.01)	0.00507678
NSMCE3	2.26	(1.37 - 3.72)	0.00132802
OR5AS1	2.26	(0.31 - 16.55)	0.421046
OR8H2	2.26	(0.71 - 7.18)	0.168273
RRM2	2.26	(1.33 - 3.84)	0.00268862
TUFM	2.26	(1.34 - 3.82)	0.00229106
BRCA1	2.25	(1.36 - 3.7)	0.00146122
CLP1	2.25	(1.32 - 3.84)	0.00281829
CNBP	2.25	(1.23 - 4.11)	0.00860396
CT47A7	2.25	(1.3 - 3.87)	0.00349248
GET3	2.25	(1.39 - 3.62)	0.000874526
HNRNPA1L2	2.25	(1.28 - 3.93)	0.00464755
IDE	2.25	(1.44 - 3.52)	0.000355825
NUTF2	2.25	(1.31 - 3.87)	0.00317158
OR51T1	2.25	(0.3 - 16.81)	0.42919
PRELID3B	2.25	(1.42 - 3.56)	0.000528439
RAVER1	2.25	(1.29 - 3.93)	0.00442665
RPL38	2.25	(1.23 - 4.1)	0.00815783
SLF1	2.25	(1.45 - 3.49)	0.000306708
TIMM17B	2.25	(1.3 - 3.88)	0.00357947
WWOX	2.25	(1.32 - 3.83)	0.00286088
ATF6	2.24	(1.47 - 3.41)	0.000173332
GORASP2	2.24	(1.44 - 3.49)	0.000339894
NDUFA12	2.24	(1.47 - 3.43)	0.000195245
POLR3D	2.24	(1.26 - 3.98)	0.005999
STX10	2.24	(1.33 - 3.77)	0.00237338
TPR	2.24	(1.44 - 3.49)	0.000348791
TSG101	2.24	(1.46 - 3.44)	0.000238389
AGO2	2.23	(1.37 - 3.63)	0.00118257
BLOC1S4	2.23	(1.3 - 3.82)	0.00367783
CFAP20DC	2.23	(1.44 - 3.45)	0.00029663
CKS1B	2.23	(1.31 - 3.79)	0.00312495
COX6B1	2.23	(1.28 - 3.89)	0.00460333
CYB5A	2.23	(1.47 - 3.4)	0.000174345
FAM240A	2.23	(1.12 - 4.44)	0.0221825
FYTTD1	2.23	(1.47 - 3.38)	0.000167578
GEMIN2	2.23	(1.38 - 3.61)	0.00102748
KIF22	2.23	(1.28 - 3.9)	0.00470178
LRRN4	2.23	(1.44 - 3.45)	0.000344624
MRGBP	2.23	(1.24 - 4.02)	0.00744823
N4BP2	2.23	(1.35 - 3.69)	0.0016791
OCIAD1	2.23	(1.28 - 3.89)	0.00477697
OR9Q1	2.23	(1.17 - 4.25)	0.0149714
PATL1	2.23	(1.44 - 3.44)	0.000323697
SKP2	2.23	(1.27 - 3.88)	0.00489869
SLC35A4	2.23	(1.39 - 3.58)	0.000923856
SMIM20	2.23	(1.29 - 3.86)	0.00401213
TMLHE	2.23	(1.29 - 3.85)	0.00420936
TWNK	2.23	(1.27 - 3.92)	0.00523175
ZIM3	2.23	(0.81 - 6.12)	0.119831
APEX2	2.22	(1.3 - 3.79)	0.00333527
FBXO45	2.22	(1.36 - 3.6)	0.00136698
LYAR	2.22	(1.26 - 3.92)	0.00561953
MFSD2A	2.22	(1.41 - 3.5)	0.000618508
MTIF2	2.22	(1.41 - 3.5)	0.000596715
NDC1	2.22	(1.42 - 3.46)	0.000451589
NSL1	2.22	(1.44 - 3.42)	0.000278875
PRC1	2.22	(1.37 - 3.61)	0.00119061
RAD50	2.22	(1.38 - 3.56)	0.000971391
SEPTIN2	2.22	(1.44 - 3.41)	0.000274785
SLC19A2	2.22	(1.3 - 3.77)	0.00325651
WDCP	2.22	(1.35 - 3.67)	0.00174035
BCCIP	2.21	(1.32 - 3.69)	0.00262786
BZW1	2.21	(1.46 - 3.35)	0.000167132
CEP44	2.21	(1.32 - 3.71)	0.00266374
CRLS1	2.21	(1.33 - 3.68)	0.00232875
DPH3	2.21	(1.42 - 3.46)	0.000467233
MIX23	2.21	(1.26 - 3.86)	0.00549139
PPP2R5E	2.21	(1.36 - 3.58)	0.00130252
RPGRIP1L	2.21	(1.34 - 3.64)	0.00182269
RPL36A	2.21	(1.25 - 3.94)	0.00681456
SMIM15	2.21	(1.42 - 3.44)	0.000452299
TERT	2.21	(1.22 - 4)	0.00864196
TMEM192	2.21	(1.33 - 3.67)	0.0021477
UBE2R2	2.21	(1.3 - 3.75)	0.00330112
UGT2A3	2.21	(0.76 - 6.44)	0.147129
XRCC6	2.21	(1.31 - 3.73)	0.00299902
ZNF480	2.21	(1.33 - 3.67)	0.00216383
E2F4	2.2	(1.43 - 3.39)	0.000346384
ERP44	2.2	(1.44 - 3.37)	0.000279697
FBL	2.2	(1.21 - 3.98)	0.00953449
H2AX	2.2	(1.24 - 3.92)	0.00713197
KLF15	2.2	(1.24 - 3.91)	0.00740479
MCMBP	2.2	(1.36 - 3.57)	0.00135001
NOC3L	2.2	(1.32 - 3.69)	0.00262274
OR4X2	2.2	(0.54 - 9.03)	0.274625
PFDN6	2.2	(1.38 - 3.5)	0.000936333
PIAS4	2.2	(1.44 - 3.37)	0.000274639
POLR2C	2.2	(1.22 - 3.97)	0.00891265
PSMA3	2.2	(1.23 - 3.91)	0.00753728
RNASEH1	2.2	(1.45 - 3.32)	0.000198699
RPS5	2.2	(1.26 - 3.85)	0.00572902
SPRED3	2.2	(1.27 - 3.8)	0.00503331
THOP1	2.2	(1.3 - 3.71)	0.00322558
AGR3	2.19	(0.69 - 7.01)	0.185131
DNA2	2.19	(1.3 - 3.71)	0.00346496
FRG1	2.19	(1.26 - 3.81)	0.00572226
G3BP2	2.19	(1.43 - 3.35)	0.000313372
GTF2F2	2.19	(1.33 - 3.61)	0.00207498
KLF16	2.19	(1.26 - 3.78)	0.00516305
MRPS9	2.19	(1.4 - 3.44)	0.000650896
NCBP2	2.19	(1.3 - 3.7)	0.00314166
PIGY	2.19	(1.16 - 4.14)	0.0160201
PYURF	2.19	(1.16 - 4.14)	0.0160201
SDAD1	2.19	(1.33 - 3.61)	0.00208241
SLC9B1	2.19	(1.4 - 3.42)	0.000582908
TM9SF3	2.19	(1.45 - 3.32)	0.000203436
EID2	2.18	(1.42 - 3.36)	0.000391466
GCSH	2.18	(1.29 - 3.67)	0.00352215
GLA	2.18	(1.31 - 3.63)	0.00274365
IARS2	2.18	(1.42 - 3.33)	0.000331879
IPO5	2.18	(1.32 - 3.58)	0.00221403
MAIP1	2.18	(1.37 - 3.47)	0.000979698
PPFIA1	2.18	(1.43 - 3.32)	0.000271313
TARS1	2.18	(1.31 - 3.63)	0.00260532
TSEN54	2.18	(1.3 - 3.64)	0.00298209
DNAJC2	2.17	(1.32 - 3.57)	0.00215764
DNAJC25	2.17	(1.42 - 3.32)	0.000363565
GOLGA5	2.17	(1.37 - 3.43)	0.000902669
KPNB1	2.17	(1.27 - 3.72)	0.00478742
LCTL	2.17	(1.42 - 3.34)	0.000389159
NDUFB6	2.17	(1.31 - 3.6)	0.00264868
NUDT15	2.17	(1.39 - 3.41)	0.000710618
SLC25A24	2.17	(1.45 - 3.24)	0.000150601
SUV39H1	2.17	(1.27 - 3.7)	0.00464243
CDC45	2.16	(1.2 - 3.89)	0.0106108
CUL3	2.16	(1.44 - 3.23)	0.00019918
DEK	2.16	(1.38 - 3.4)	0.000829793
GOT2	2.16	(1.28 - 3.65)	0.0041245
IVNS1ABP	2.16	(1.34 - 3.49)	0.00169314
MARK3	2.16	(1.41 - 3.31)	0.000395962
MEN1	2.16	(1.22 - 3.83)	0.00809126
MRPL19	2.16	(1.36 - 3.43)	0.00118335
MTIF3	2.16	(1.45 - 3.21)	0.00014571
NCLN	2.16	(1.31 - 3.58)	0.00275062
OR4C12	2.16	(0.3 - 15.71)	0.44517
RPL35	2.16	(1.23 - 3.79)	0.00748311
RPS16	2.16	(1.19 - 3.91)	0.0109373
SNRPC	2.16	(1.41 - 3.29)	0.000355659
SNX6	2.16	(1.33 - 3.51)	0.00189537
UBE2D3	2.16	(1.25 - 3.72)	0.00548324
ZNF639	2.16	(1.21 - 3.86)	0.00961981
AK6	2.15	(1.36 - 3.4)	0.00103791
ANKUB1	2.15	(1.19 - 3.86)	0.0106721
ATAD2B	2.15	(1.42 - 3.26)	0.000291228
ATP5PF	2.15	(1.25 - 3.7)	0.00582153
COPS9	2.15	(1.3 - 3.54)	0.00278444
DEGS1	2.15	(1.37 - 3.37)	0.000800159
FZD5	2.15	(1.44 - 3.21)	0.000186527
ITSN1	2.15	(1.37 - 3.38)	0.000834125
LANCL1	2.15	(1.45 - 3.2)	0.000154612
LTV1	2.15	(1.38 - 3.35)	0.000675924
NAE1	2.15	(1.33 - 3.47)	0.00175235
PKN1	2.15	(1.29 - 3.59)	0.00330202
PTTG1IP	2.15	(1.36 - 3.38)	0.000965568
RAD23B	2.15	(1.37 - 3.38)	0.000885532
RAD51AP1	2.15	(1.26 - 3.66)	0.00482557
SGO1	2.15	(1.27 - 3.62)	0.00420444
SPINDOC	2.15	(1.32 - 3.51)	0.00222315
TIMM50	2.15	(1.24 - 3.71)	0.00624546
UNC50	2.15	(1.38 - 3.35)	0.000756528
YIPF6	2.15	(1.3 - 3.54)	0.00273733
ALG5	2.14	(1.41 - 3.23)	0.000335444
DCAF13	2.14	(1.32 - 3.48)	0.00218633
EEF1B2	2.14	(1.22 - 3.76)	0.00778973
GALNT2	2.14	(1.41 - 3.24)	0.000373102
PCM1	2.14	(1.43 - 3.2)	0.00020896
PDCD5	2.14	(1.24 - 3.69)	0.0063705
PDCL	2.14	(1.31 - 3.52)	0.00253462
PGK2	2.14	(0.98 - 4.64)	0.0546585
PLS1	2.14	(1.34 - 3.41)	0.00147621
POMP	2.14	(1.4 - 3.28)	0.000470592
SLC25A3	2.14	(1.25 - 3.68)	0.0056175
TIMMDC1	2.14	(1.32 - 3.48)	0.00208861
TNPO1	2.14	(1.4 - 3.28)	0.000477564
ADK	2.13	(1.36 - 3.32)	0.000920168
AIFM1	2.13	(1.26 - 3.58)	0.00459853
CMBL	2.13	(1.17 - 3.9)	0.014083
COPE	2.13	(1.31 - 3.45)	0.00221931
CRB1	2.13	(1.36 - 3.35)	0.00101574
EIF3B	2.13	(1.21 - 3.75)	0.00920032
GAL	2.13	(1.28 - 3.52)	0.00335866
HEBP2	2.13	(1.39 - 3.25)	0.000470923
IFRD2	2.13	(1.24 - 3.65)	0.00588517
IGSF9	2.13	(1.23 - 3.68)	0.00710344
METTL9	2.13	(1.37 - 3.32)	0.000771616
NCBP1	2.13	(1.31 - 3.45)	0.00214766
NOL8	2.13	(1.29 - 3.51)	0.00294387
PPA2	2.13	(1.22 - 3.71)	0.00777785
PSMG2	2.13	(1.3 - 3.48)	0.00274336
RRP1B	2.13	(1.22 - 3.73)	0.00790347
TEX19	2.13	(1.28 - 3.55)	0.00360096
TIMM29	2.13	(1.29 - 3.5)	0.00296972
TRAPPC11	2.13	(1.32 - 3.43)	0.00186154
TRMT5	2.13	(1.28 - 3.55)	0.00359424
ATAD1	2.12	(1.4 - 3.21)	0.000398382
CCNF	2.12	(1.31 - 3.43)	0.00217529
CIP2A	2.12	(1.27 - 3.53)	0.00380454
DDX28	2.12	(1.18 - 3.79)	0.011648
HMGN2	2.12	(1.37 - 3.31)	0.000837455
HNRNPLL	2.12	(1.39 - 3.23)	0.000465129
IDI1	2.12	(1.39 - 3.22)	0.000441221
MRPL1	2.12	(1.25 - 3.58)	0.00498368
NDUFAF4	2.12	(1.31 - 3.42)	0.00207008
NTAQ1	2.12	(1.24 - 3.62)	0.00633785
OR1L1	2.12	(1.07 - 4.17)	0.030277
OR4K15	2.12	(0.29 - 15.48)	0.458514
PCBP1	2.12	(1.32 - 3.42)	0.00202127
PKMYT1	2.12	(1.28 - 3.5)	0.00330254
PKP4	2.12	(1.37 - 3.28)	0.00079497
SERP1	2.12	(1.26 - 3.57)	0.00472421
TXNL4B	2.12	(1.27 - 3.52)	0.00378538
UBA52	2.12	(1.21 - 3.7)	0.00832143
CTNNBL1	2.11	(1.31 - 3.41)	0.00219302
E2F1	2.11	(1.18 - 3.78)	0.0117103
ERI1	2.11	(1.36 - 3.28)	0.000897507
FAM174C	2.11	(1.31 - 3.41)	0.00229072
GK2	2.11	(0.84 - 5.26)	0.110032
HNRNPK	2.11	(1.26 - 3.52)	0.00444262
LALBA	2.11	(1.02 - 4.37)	0.0453059
LDAH	2.11	(1.34 - 3.33)	0.00121949
MRPL39	2.11	(1.28 - 3.46)	0.00324243
PRPS1L1	2.11	(1.19 - 3.77)	0.0111877
SLC26A2	2.11	(1.38 - 3.21)	0.000501659
SPICE1	2.11	(1.32 - 3.38)	0.00187075
SRP72	2.11	(1.26 - 3.55)	0.0045703
SURF4	2.11	(1.3 - 3.43)	0.00268602
TPRKB	2.11	(1.29 - 3.47)	0.00312976
UGDH	2.11	(1.26 - 3.52)	0.00455511
XPOT	2.11	(1.26 - 3.54)	0.00461887
CDC14A	2.1	(1.39 - 3.18)	0.0004496
COQ2	2.1	(1.26 - 3.51)	0.00448319
GDE1	2.1	(1.36 - 3.25)	0.00089086
GTPBP4	2.1	(1.24 - 3.55)	0.00599253
JADE3	2.1	(1.17 - 3.77)	0.0127285
KLHL23	2.1	(1.3 - 3.39)	0.00229422
LIN54	2.1	(1.31 - 3.37)	0.00206223
MASTL	2.1	(1.28 - 3.44)	0.00314348
NDUFB3	2.1	(1.37 - 3.22)	0.000705809
OR51B6	2.1	(0.66 - 6.69)	0.207263
OR5AR1	2.1	(0.29 - 15.34)	0.464485
PIGC	2.1	(1.36 - 3.24)	0.000782663
SRP9	2.1	(1.29 - 3.44)	0.00306696
TRAIP	2.1	(1.29 - 3.42)	0.00295857
ZNF227	2.1	(1.23 - 3.58)	0.00626998
AGBL5	2.09	(1.28 - 3.41)	0.0031559
COX16	2.09	(1.18 - 3.71)	0.0120358
DAD1	2.09	(1.28 - 3.41)	0.00317769
EIF1AX	2.09	(1.31 - 3.34)	0.00201707
ELOB	2.09	(1.27 - 3.45)	0.00376648
HADH	2.09	(1.19 - 3.69)	0.0106343
KRT76	2.09	(0.49 - 8.87)	0.315387
LCORL	2.09	(1.39 - 3.12)	0.000342935
MRPL54	2.09	(1.24 - 3.53)	0.00590166
MRPS17	2.09	(1.26 - 3.46)	0.00406182
NEMP1	2.09	(1.26 - 3.47)	0.00435428
RNASEH2B	2.09	(1.36 - 3.23)	0.000837132
SFR1	2.09	(1.33 - 3.3)	0.00153236
SLC35A2	2.09	(1.3 - 3.34)	0.00223099
TEX55	2.09	(1.25 - 3.5)	0.00503025
ZNF143	2.09	(1.39 - 3.15)	0.000428048
C19orf25	2.08	(1.35 - 3.22)	0.000963795
CDC20	2.08	(1.27 - 3.41)	0.00351136
CDKN2AIP	2.08	(1.29 - 3.34)	0.0025062
E2F5	2.08	(1.31 - 3.32)	0.00201072
FOXM1	2.08	(1.21 - 3.58)	0.00777904
HSP90AA1	2.08	(1.37 - 3.18)	0.000669785
LTA4H	2.08	(1.27 - 3.41)	0.00367358
METTL21A	2.08	(1.21 - 3.57)	0.00836278
NUP98	2.08	(1.31 - 3.33)	0.00206003
POLQ	2.08	(1.27 - 3.42)	0.00381216
PRDX3	2.08	(1.32 - 3.26)	0.00159243
PSMD2	2.08	(1.33 - 3.25)	0.00138123
RNGTT	2.08	(1.39 - 3.11)	0.000375384
RPS21	2.08	(1.18 - 3.66)	0.011276
RRP15	2.08	(1.28 - 3.38)	0.00302816
SLC5A6	2.08	(1.3 - 3.33)	0.00235561
SSR3	2.08	(1.17 - 3.72)	0.012992
TMEM129	2.08	(1.35 - 3.21)	0.000977808
VARS1	2.08	(1.22 - 3.54)	0.00695013
YEATS4	2.08	(1.25 - 3.46)	0.00473524
ZBTB33	2.08	(1.24 - 3.48)	0.00546132
ZNF486	2.08	(1.22 - 3.56)	0.00731088
ZNF732	2.08	(1.24 - 3.49)	0.00561
APOO	2.07	(1.2 - 3.58)	0.00890218
ARMC6	2.07	(1.15 - 3.74)	0.0157727
CHRAC1	2.07	(1.3 - 3.29)	0.00207541
COMMD2	2.07	(1.32 - 3.24)	0.00154081
COX5B	2.07	(1.31 - 3.27)	0.00195684
CTBP2	2.07	(1.36 - 3.14)	0.000657035
DENND10	2.07	(1.34 - 3.2)	0.00106527
DPP3	2.07	(1.25 - 3.43)	0.00469385
MED10	2.07	(1.36 - 3.15)	0.000731675
MED12L	2.07	(1.29 - 3.3)	0.00236503
OCIAD2	2.07	(1.14 - 3.78)	0.0175053
OPA1	2.07	(1.33 - 3.24)	0.00138577
PIMREG	2.07	(1.23 - 3.47)	0.00586331
PUM3	2.07	(1.21 - 3.54)	0.0082638
SPAG16	2.07	(1.38 - 3.1)	0.000428102
TBL1X	2.07	(1.22 - 3.53)	0.00713813
TIMM10B	2.07	(1.3 - 3.29)	0.00202802
TMIGD1	2.07	(0.83 - 5.16)	0.118659
YIPF5	2.07	(1.38 - 3.1)	0.00043439
ZNF726	2.07	(1.3 - 3.3)	0.00217292
ARPC5L	2.06	(1.33 - 3.18)	0.00114606
ATP5PD	2.06	(1.25 - 3.41)	0.00459611
CFAP95	2.06	(1.36 - 3.13)	0.000698286
COPS7B	2.06	(1.27 - 3.34)	0.00352305
DNAJA3	2.06	(1.24 - 3.45)	0.00567684
ESPL1	2.06	(1.25 - 3.4)	0.00443186
FAHD1	2.06	(1.37 - 3.11)	0.00057331
GAPDH	2.06	(1.11 - 3.82)	0.021251
MARS2	2.06	(1.22 - 3.46)	0.00646235
MINPP1	2.06	(1.27 - 3.35)	0.00347064
NAA60	2.06	(1.34 - 3.16)	0.00092772
OR5F1	2.06	(0.5 - 8.47)	0.317139
ORC1	2.06	(1.29 - 3.28)	0.00240049
OSER1	2.06	(1.24 - 3.42)	0.00538999
PAK1IP1	2.06	(1.29 - 3.28)	0.00232736
PDS5A	2.06	(1.26 - 3.37)	0.00417311
PLAGL2	2.06	(1.29 - 3.3)	0.00258912
TIGD1	2.06	(1.2 - 3.54)	0.0086222
TMEM60	2.06	(1.35 - 3.16)	0.000888502
UGGT1	2.06	(1.36 - 3.13)	0.000651256
CTR9	2.05	(1.31 - 3.22)	0.00178529
EBAG9	2.05	(1.36 - 3.08)	0.000546579
EIF2S1	2.05	(1.21 - 3.48)	0.00794301
ETFA	2.05	(1.22 - 3.44)	0.00652768
JADE1	2.05	(1.22 - 3.45)	0.00711698
LSM8	2.05	(1.36 - 3.1)	0.000681327
OR7G3	2.05	(0.5 - 8.4)	0.317712
PANK3	2.05	(1.28 - 3.28)	0.0028283
SENP2	2.05	(1.35 - 3.13)	0.000821084
SRPRB	2.05	(1.16 - 3.63)	0.0133581
SURF1	2.05	(1.32 - 3.19)	0.001381
TTF2	2.05	(1.24 - 3.38)	0.00493777
YME1L1	2.05	(1.36 - 3.09)	0.000628977
YWHAB	2.05	(1.32 - 3.18)	0.00129597
C2orf81	2.04	(1.29 - 3.22)	0.00214918
COPS4	2.04	(1.24 - 3.35)	0.00501477
DDX49	2.04	(1.21 - 3.43)	0.00734652
ECHDC1	2.04	(1.33 - 3.13)	0.00101277
KIAA1958	2.04	(1.21 - 3.44)	0.00761416
MYPOP	2.04	(1.31 - 3.19)	0.00166324
PNO1	2.04	(1.25 - 3.33)	0.00445591
POLR1B	2.04	(1.2 - 3.48)	0.00864012
RPS11	2.04	(1.15 - 3.63)	0.0148511
STRAP	2.04	(1.33 - 3.13)	0.00113368
TBPL1	2.04	(1.37 - 3.05)	0.000494213
TIGD2	2.04	(1.2 - 3.48)	0.00876969
TMEM186	2.04	(1.2 - 3.47)	0.00826783
TUBG1	2.04	(1.32 - 3.15)	0.00123031
UCK2	2.04	(1.2 - 3.48)	0.00852064
WDR12	2.04	(1.2 - 3.45)	0.00828843
CCNB1IP1	2.03	(1.18 - 3.49)	0.0103046
CHAF1B	2.03	(1.17 - 3.53)	0.0122711
DNAJB11	2.03	(1.28 - 3.21)	0.00249235
EIF1AD	2.03	(1.3 - 3.17)	0.00182636
GATB	2.03	(1.22 - 3.37)	0.00643713
GTF2F1	2.03	(1.15 - 3.57)	0.0139196
ING2	2.03	(1.22 - 3.37)	0.00673197
MYCBP	2.03	(1.28 - 3.22)	0.0026317
NAA50	2.03	(1.25 - 3.31)	0.00424269
NAP1L1	2.03	(1.23 - 3.37)	0.00587182
PNP	2.03	(1.24 - 3.34)	0.00502647
POLR2E	2.03	(1.31 - 3.14)	0.00141782
PYCR1	2.03	(1.1 - 3.73)	0.0231782
RAE1	2.03	(1.28 - 3.21)	0.0024953
RPL26L1	2.03	(1.27 - 3.25)	0.00320543
SLC6A19	2.03	(1.37 - 3.02)	0.000458361
XRN2	2.03	(1.2 - 3.44)	0.00820565
ARG2	2.02	(1.27 - 3.22)	0.00315491
ATP6V1D	2.02	(1.32 - 3.07)	0.00111361
CDCA8	2.02	(1.3 - 3.12)	0.0017013
CEP20	2.02	(1.19 - 3.41)	0.0088588
CPN1	2.02	(0.91 - 4.46)	0.0827175
HOXB1	2.02	(1.12 - 3.63)	0.0195733
HTATSF1	2.02	(1.32 - 3.11)	0.00130208
KLF1	2.02	(1.24 - 3.28)	0.00482733
MPLKIP	2.02	(1.22 - 3.35)	0.00664573
MRPS27	2.02	(1.19 - 3.43)	0.00919107
MTCP1	2.02	(1.31 - 3.11)	0.00135801
NSMCE4A	2.02	(1.26 - 3.26)	0.00369761
PGRMC2	2.02	(1.29 - 3.16)	0.00219902
PTH2	2.02	(1.11 - 3.7)	0.0220638
RABEPK	2.02	(1.14 - 3.61)	0.0168301
RDH11	2.02	(1.3 - 3.12)	0.0016116
RPL7A	2.02	(1.17 - 3.48)	0.011189
RRP1	2.02	(1.14 - 3.59)	0.0167303
SIVA1	2.02	(1.07 - 3.83)	0.0307122
TIGD7	2.02	(1.19 - 3.41)	0.00907905
TK1	2.02	(1.15 - 3.55)	0.0150425
TMEM182	2.02	(1.34 - 3.05)	0.000806598
TPI1	2.02	(1.26 - 3.24)	0.00360858
USO1	2.02	(1.29 - 3.17)	0.0021115
ADSS2	2.01	(1.29 - 3.14)	0.00208831
AXIN1	2.01	(1.3 - 3.1)	0.0017012
BAG5	2.01	(1.18 - 3.44)	0.0105371
BPNT1	2.01	(1.32 - 3.06)	0.00120596
C5orf34	2.01	(1.25 - 3.22)	0.00378262
CIAPIN1	2.01	(1.33 - 3.03)	0.000849311
COCH	2.01	(1.23 - 3.3)	0.00569197
GTF2E2	2.01	(1.21 - 3.32)	0.00694546
H4C9	2.01	(1.24 - 3.25)	0.00468673
HAUS1	2.01	(1.21 - 3.35)	0.00681983
HSPA5	2.01	(1.34 - 3.02)	0.000713871
IGF2BP3	2.01	(1.25 - 3.22)	0.00387785
INTS7	2.01	(1.16 - 3.48)	0.0122038
MKNK2	2.01	(1.32 - 3.07)	0.00114852
NARS1	2.01	(1.34 - 3.03)	0.00079657
NDUFB1	2.01	(1.26 - 3.2)	0.00355296
NUP155	2.01	(1.23 - 3.29)	0.00523932
POLD1	2.01	(1.09 - 3.73)	0.026141
RNF20	2.01	(1.33 - 3.02)	0.000822273
RP2	2.01	(1.31 - 3.08)	0.0013356
RPS6KA6	2.01	(1.24 - 3.25)	0.0043365
SMYD3	2.01	(1.29 - 3.14)	0.00198772
UPF3B	2.01	(1.23 - 3.3)	0.00538046
ZNF556	2.01	(1.22 - 3.3)	0.00585131
ZNF790	2.01	(1.29 - 3.13)	0.00217831
ARF6	2	(1.29 - 3.09)	0.00201695
BZW2	2	(1.14 - 3.5)	0.0158212
CA14	2	(1.33 - 3.02)	0.000929059
CMC2	2	(1.27 - 3.14)	0.00272375
DCK	2	(1.33 - 3.01)	0.000905501
DEFB115	2	(0.48 - 8.28)	0.340266
ERI2	2	(1.29 - 3.11)	0.00209624
FAM210A	2	(1.34 - 3.01)	0.000772865
FKBP4	2	(1.14 - 3.52)	0.0155536
GPX7	2	(1.29 - 3.1)	0.00194255
HMGN4	2	(1.27 - 3.14)	0.00262843
ING1	2	(1.28 - 3.11)	0.00225151
LSM6	2	(1.13 - 3.54)	0.0169835
NDUFS7	2	(1.19 - 3.39)	0.00940286
NPPC	2	(1.09 - 3.67)	0.0256043
OR51B4	2	(1.26 - 3.17)	0.00338814
POLR1C	2	(1.2 - 3.36)	0.00829927
PRRC1	2	(1.29 - 3.12)	0.00212324
QPRT	2	(1.2 - 3.32)	0.007644
RBM42	2	(1.28 - 3.13)	0.00239784
TCOF1	2	(1.31 - 3.06)	0.00143274
ZSCAN32	2	(1.17 - 3.42)	0.0111987
AKAP5	1.99	(1.3 - 3.04)	0.00140711
API5	1.99	(1.27 - 3.12)	0.00271576
CENPV	1.99	(1.18 - 3.36)	0.0100514
CFAP210	1.99	(1.29 - 3.06)	0.00172539
DCUN1D4	1.99	(1.28 - 3.11)	0.0023876
DEFB103B	1.99	(0.72 - 5.53)	0.186824
DOLPP1	1.99	(1.21 - 3.27)	0.00645913
ENO3	1.99	(1.34 - 2.96)	0.000713579
GNPDA1	1.99	(1.2 - 3.3)	0.00809874
HDGF	1.99	(1.13 - 3.5)	0.0163979
JPT2	1.99	(1.28 - 3.11)	0.00240644
KCNN2	1.99	(1.25 - 3.18)	0.00384709
MLF1	1.99	(1.31 - 3.02)	0.00125426
MS4A13	1.99	(1.27 - 3.09)	0.00243673
NOB1	1.99	(1.09 - 3.61)	0.0239868
OOSP2	1.99	(0.79 - 4.98)	0.142523
PDK1	1.99	(1.16 - 3.4)	0.0123644
PKM	1.99	(1.2 - 3.3)	0.00759029
PLA2G2F	1.99	(1.11 - 3.57)	0.021197
PPIA	1.99	(1.2 - 3.33)	0.00824628
PPIG	1.99	(1.34 - 2.97)	0.000655838
PSMG3	1.99	(1.31 - 3.05)	0.00141805
RIBC2	1.99	(1.25 - 3.17)	0.00359591
RLIM	1.99	(1.11 - 3.55)	0.0206594
RPS20	1.99	(1.12 - 3.54)	0.0190095
SHCBP1	1.99	(1.22 - 3.23)	0.00574828
SPCS1	1.99	(1.27 - 3.11)	0.00246706
SQLE	1.99	(1.22 - 3.26)	0.00619013
TMX1	1.99	(1.24 - 3.2)	0.00437512
TRIML1	1.99	(1.03 - 3.86)	0.0412556
ATP2B1	1.98	(1.32 - 2.97)	0.000965841
BOD1	1.98	(1.12 - 3.51)	0.0195602
CBX2	1.98	(1.2 - 3.28)	0.00802601
CCDC181	1.98	(1.29 - 3.05)	0.00185755
CDR2	1.98	(1.31 - 3)	0.00123653
CKB	1.98	(1.18 - 3.34)	0.010238
FAM81A	1.98	(1.27 - 3.1)	0.0026545
FBXO22	1.98	(1.23 - 3.21)	0.0051859
HTN3	1.98	(1.21 - 3.23)	0.0066785
KLC2	1.98	(1.18 - 3.33)	0.00952172
LSM3	1.98	(1.18 - 3.3)	0.00912876
PDCD2L	1.98	(1.24 - 3.16)	0.0040726
RAD21	1.98	(1.31 - 2.99)	0.00119715
SF3B4	1.98	(1.24 - 3.16)	0.00443672
SMARCA4	1.98	(1.22 - 3.21)	0.00562555
SMS	1.98	(1.22 - 3.21)	0.00565522
TMUB1	1.98	(1.28 - 3.05)	0.00196432
VTI1B	1.98	(1.21 - 3.24)	0.00629689
WFDC5	1.98	(0.91 - 4.29)	0.0830661
ZCCHC4	1.98	(1.21 - 3.23)	0.0063263
ZNF35	1.98	(1.3 - 3.01)	0.0015066
ZNF569	1.98	(1.23 - 3.19)	0.00495313
ACBD6	1.97	(1.12 - 3.47)	0.0188142
ATP5MC3	1.97	(1.27 - 3.07)	0.00266652
CIBAR2	1.97	(1.27 - 3.08)	0.00271833
COX7A2	1.97	(1.22 - 3.18)	0.00521751
CYP2A13	1.97	(0.91 - 4.29)	0.0868376
DDN	1.97	(1.09 - 3.56)	0.0241513
DSN1	1.97	(1.2 - 3.22)	0.00736505
ENPP5	1.97	(1.3 - 3)	0.00140265
HDGFL3	1.97	(1.3 - 2.98)	0.00136426
HSP90B1	1.97	(1.3 - 2.99)	0.00138406
LSG1	1.97	(1.24 - 3.13)	0.00424924
OBI1	1.97	(1.32 - 2.94)	0.000851339
PDE6D	1.97	(1.32 - 2.96)	0.000959594
PSMA4	1.97	(1.23 - 3.14)	0.00449907
RET	1.97	(1.22 - 3.18)	0.00539839
RHEB	1.97	(1.27 - 3.06)	0.00245515
RPS27L	1.97	(1.26 - 3.07)	0.0028071
RRP9	1.97	(1.14 - 3.39)	0.0146859
RSPO4	1.97	(1.25 - 3.09)	0.00329034
SLC20A1	1.97	(1.25 - 3.1)	0.00351879
SPANXC	1.97	(1.17 - 3.32)	0.0107043
TOP1	1.97	(1.27 - 3.05)	0.00230315
TRMT1L	1.97	(1.31 - 2.96)	0.00103758
TTC30B	1.97	(1.31 - 2.96)	0.00119879
TXNDC5	1.97	(1.24 - 3.13)	0.00406524
UXT	1.97	(1.07 - 3.63)	0.0297058
WDR18	1.97	(1.21 - 3.2)	0.00642602
ZNF571	1.97	(1.32 - 2.93)	0.000883593
ZNF718	1.97	(1.22 - 3.16)	0.00532433
ZYG11A	1.97	(1.26 - 3.06)	0.00272278
AQP5	1.96	(1.28 - 2.99)	0.00191517
ARHGEF39	1.96	(1.29 - 2.96)	0.00151829
CCT2	1.96	(1.19 - 3.23)	0.0082721
CHRNB3	1.96	(1.2 - 3.21)	0.00748933
CRKL	1.96	(1.22 - 3.14)	0.00557665
DDX50	1.96	(1.2 - 3.2)	0.00739483
DPY30	1.96	(1.29 - 2.98)	0.00156015
EFL1	1.96	(1.27 - 3.03)	0.00235506
EHHADH	1.96	(1.3 - 2.96)	0.00141849
EIF3A	1.96	(1.26 - 3.07)	0.00303012
FARS2	1.96	(1.28 - 3.01)	0.00203147
GINS4	1.96	(1.15 - 3.33)	0.0131458
IMPDH2	1.96	(1.15 - 3.33)	0.0132831
KIF2B	1.96	(0.79 - 4.85)	0.14689
MCUR1	1.96	(1.22 - 3.15)	0.00515245
MDH1	1.96	(1.32 - 2.92)	0.000939361
MDK	1.96	(1.13 - 3.38)	0.0163733
NCAPD2	1.96	(1.12 - 3.44)	0.0179583
NDUFB7	1.96	(1.23 - 3.12)	0.00442619
OR56A3	1.96	(1.18 - 3.26)	0.00966487
PFDN4	1.96	(1.17 - 3.3)	0.0106147
PIK3R2	1.96	(1.2 - 3.2)	0.00684372
PLEKHJ1	1.96	(1.24 - 3.11)	0.00418167
PTCD2	1.96	(1.22 - 3.14)	0.00525118
SEC61A1	1.96	(1.16 - 3.3)	0.0114124
TFAM	1.96	(1.19 - 3.22)	0.00837993
TIMM13	1.96	(1.16 - 3.29)	0.0114313
TMPO	1.96	(1.21 - 3.18)	0.00632064
ARF4	1.95	(1.14 - 3.32)	0.0146725
B3GNT5	1.95	(1.17 - 3.25)	0.0102653
BABAM1	1.95	(1.24 - 3.08)	0.0040611
CHD1L	1.95	(1.23 - 3.09)	0.00467257
CRISP1	1.95	(0.79 - 4.8)	0.148901
DHX40	1.95	(1.25 - 3.04)	0.00322026
DNAJB1	1.95	(1.25 - 3.04)	0.00335642
E2F2	1.95	(1.26 - 3.01)	0.00271785
EIF2AK4	1.95	(1.23 - 3.07)	0.00426095
FGF2	1.95	(1.22 - 3.12)	0.00556805
GSTO1	1.95	(1.06 - 3.6)	0.032651
PRPF19	1.95	(1.07 - 3.57)	0.0292101
PSMB1	1.95	(1.22 - 3.1)	0.00498494
RCC1L	1.95	(1.21 - 3.14)	0.00647588
RPL36	1.95	(1.12 - 3.42)	0.0188733
RTF2	1.95	(1.26 - 3)	0.00250758
SFT2D3	1.95	(1.21 - 3.16)	0.00636133
SRSF1	1.95	(1.15 - 3.28)	0.0124742
TOMM22	1.95	(1.09 - 3.48)	0.0235575
USP44	1.95	(1.15 - 3.31)	0.0138159
VPS37C	1.95	(1.27 - 3)	0.0024249
ZCCHC3	1.95	(1.23 - 3.07)	0.00417493
AP3D1	1.94	(1.3 - 2.9)	0.00110339
CHM	1.94	(1.24 - 3.04)	0.00370778
DEFB123	1.94	(0.78 - 4.82)	0.15596
ERGIC1	1.94	(1.25 - 3.01)	0.0032895
GRSF1	1.94	(1.15 - 3.28)	0.013574
GTF2A2	1.94	(1.22 - 3.09)	0.00531271
LSMEM2	1.94	(1.16 - 3.25)	0.0116938
MAP2K6	1.94	(1.18 - 3.17)	0.00876423
MNS1	1.94	(1.23 - 3.04)	0.00416485
MRPL12	1.94	(1.05 - 3.59)	0.0350608
NAF1	1.94	(1.09 - 3.43)	0.0233199
NIPA2	1.94	(1.27 - 2.97)	0.00216434
PARP1	1.94	(1.2 - 3.12)	0.00651142
PDCL3	1.94	(1.24 - 3.04)	0.00381457
PDSS1	1.94	(1.09 - 3.45)	0.0249029
PLPBP	1.94	(1.28 - 2.95)	0.00172278
POP4	1.94	(1.14 - 3.29)	0.0140808
RIF1	1.94	(1.22 - 3.1)	0.00506542
RPL13	1.94	(1.11 - 3.4)	0.0195305
RPL39	1.94	(1.09 - 3.48)	0.0250379
RPLP2	1.94	(1.08 - 3.5)	0.0270209
TP53	1.94	(1.13 - 3.33)	0.0158889
TPMT	1.94	(1.13 - 3.34)	0.0163478
TRIM15	1.94	(1.25 - 3.01)	0.00296941
TSFM	1.94	(1.24 - 3.04)	0.00373445
TTLL5	1.94	(1.16 - 3.25)	0.0113469
UBE2Q1	1.94	(1.24 - 3.04)	0.00372356
UBR7	1.94	(1.16 - 3.24)	0.0116793
ACAT2	1.93	(1.29 - 2.89)	0.00150438
ANAPC10	1.93	(1.17 - 3.19)	0.0102043
BTBD1	1.93	(1.28 - 2.89)	0.00159919
C16orf95	1.93	(1.22 - 3.06)	0.00495621
CFDP1	1.93	(1.24 - 3.01)	0.00355701
CFL1	1.93	(1.18 - 3.16)	0.00896468
DNAJA2	1.93	(1.21 - 3.08)	0.0057802
DTL	1.93	(1.1 - 3.37)	0.0213837
EIF2S3	1.93	(1.12 - 3.34)	0.0180459
EIF4E2	1.93	(1.24 - 3)	0.00341528
FLAD1	1.93	(1.23 - 3.03)	0.0045049
H4C6	1.93	(1.23 - 3.03)	0.00413962
ICA1	1.93	(1.26 - 2.97)	0.0025096
MTX2	1.93	(1.3 - 2.88)	0.00116883
NUDT9	1.93	(1.23 - 3.01)	0.00407016
OR5P3	1.93	(0.69 - 5.35)	0.208678
PFDN2	1.93	(1.19 - 3.14)	0.00816172
PHB2	1.93	(1.1 - 3.39)	0.0226473
RPS2	1.93	(1.09 - 3.44)	0.025068
RTKN	1.93	(1.25 - 2.98)	0.00318758
STOML2	1.93	(1.07 - 3.5)	0.0296252
VTA1	1.93	(1.29 - 2.89)	0.00137618
ZDHHC12	1.93	(1.26 - 2.97)	0.0025826
ZNF485	1.93	(1.11 - 3.35)	0.0189334
ACTRT2	1.92	(0.6 - 6.13)	0.2721
ATP5F1D	1.92	(1.17 - 3.15)	0.00958031
BORCS8	1.92	(1.21 - 3.05)	0.00558341
CNOT11	1.92	(1.27 - 2.91)	0.00198045
CTAGE6	1.92	(1.27 - 2.92)	0.00209977
CWC22	1.92	(1.29 - 2.86)	0.00132639
DLK1	1.92	(1.28 - 2.88)	0.0015523
EDF1	1.92	(1.16 - 3.19)	0.0114134
ERCC8	1.92	(1.2 - 3.09)	0.00705066
ESRP2	1.92	(1.14 - 3.22)	0.013622
GFM2	1.92	(1.28 - 2.9)	0.00176535
GNL2	1.92	(1.28 - 2.87)	0.001554
HASPIN	1.92	(1.13 - 3.27)	0.0160929
LRRC20	1.92	(1.21 - 3.04)	0.00546926
MACROD1	1.92	(1.12 - 3.27)	0.0173114
MANF	1.92	(1.17 - 3.15)	0.00985062
NACC1	1.92	(1.09 - 3.38)	0.0239304
OR5H14	1.92	(0.27 - 13.95)	0.517328
OST4	1.92	(1.21 - 3.04)	0.00583524
PDZD11	1.92	(1.14 - 3.23)	0.0145564
SATL1	1.92	(1.28 - 2.88)	0.00158242
TMEM231	1.92	(1.17 - 3.18)	0.0104163
VMP1	1.92	(1.26 - 2.93)	0.00239016
YIF1B	1.92	(1.22 - 3.03)	0.00468552
YY1	1.92	(1.17 - 3.13)	0.00931036
ARC	1.91	(1.18 - 3.09)	0.0083138
CD2BP2	1.91	(1.24 - 2.95)	0.0034804
CENPJ	1.91	(1.24 - 2.93)	0.00340291
CIBAR1	1.91	(1.22 - 3)	0.00497346
CSTF2T	1.91	(1.22 - 3)	0.00475752
DHX36	1.91	(1.18 - 3.08)	0.00821413
DNAJC21	1.91	(1.29 - 2.84)	0.00128166
EBP	1.91	(1.03 - 3.54)	0.0399141
GHRH	1.91	(1.21 - 3.01)	0.00513766
GLRX5	1.91	(1.25 - 2.91)	0.00292585
HOMEZ	1.91	(1.23 - 2.95)	0.00367012
IFTAP	1.91	(1.13 - 3.21)	0.0149589
INSIG2	1.91	(1.14 - 3.17)	0.013125
MRPL16	1.91	(1.1 - 3.3)	0.0215665
MRPS7	1.91	(1.1 - 3.32)	0.0217636
NPW	1.91	(1.12 - 3.25)	0.017429
OR9G1	1.91	(0.26 - 13.84)	0.522674
OR9G9	1.91	(0.26 - 13.84)	0.522674
PANK1	1.91	(1.22 - 2.99)	0.00437541
PTPN1	1.91	(1.2 - 3.03)	0.00641431
RAD54B	1.91	(1.18 - 3.11)	0.00899625
RB1	1.91	(1.26 - 2.9)	0.00236263
RPL34	1.91	(1.08 - 3.38)	0.0255873
RPP40	1.91	(1.15 - 3.18)	0.0131331
SLX9	1.91	(1.06 - 3.45)	0.0322861
SPAG5	1.91	(1.23 - 2.95)	0.00378274
STAMBPL1	1.91	(1.23 - 2.96)	0.00385455
STARD4	1.91	(1.27 - 2.88)	0.00186768
THOC3	1.91	(1.16 - 3.14)	0.0110909
XPO1	1.91	(1.28 - 2.85)	0.00160547
ABRAXAS2	1.9	(1.27 - 2.86)	0.00199033
AHCTF1	1.9	(1.21 - 2.98)	0.00510032
ALG2	1.9	(1.26 - 2.86)	0.00227981
ATP5PO	1.9	(1.1 - 3.26)	0.0203547
CCNA1	1.9	(1.22 - 2.95)	0.00432274
COMMD8	1.9	(1.23 - 2.94)	0.00364408
DGUOK	1.9	(1.2 - 3)	0.00620384
KCNJ12	1.9	(1.29 - 2.82)	0.00129802
MAGEA10	1.9	(1.2 - 3)	0.00578274
MRPL44	1.9	(1.14 - 3.19)	0.0143079
NELFB	1.9	(1.19 - 3.04)	0.00722636
NUP54	1.9	(1.2 - 3)	0.00630039
OLFM4	1.9	(1.19 - 3.01)	0.00668562
OR7A17	1.9	(0.25 - 14.51)	0.536077
PRR18	1.9	(1.21 - 3)	0.00566328
PSG6	1.9	(0.92 - 3.95)	0.0846666
PSMA2	1.9	(1.23 - 2.95)	0.00409748
PSMC1	1.9	(1.19 - 3.06)	0.00765364
PSME4	1.9	(1.2 - 3.02)	0.00615854
RPL36AL	1.9	(1.09 - 3.32)	0.0242721
RTN4IP1	1.9	(1.27 - 2.85)	0.00187759
SAV1	1.9	(1.26 - 2.86)	0.00213977
SLC39A11	1.9	(1.18 - 3.06)	0.00803461
SRBD1	1.9	(1.24 - 2.92)	0.00329708
TMED10	1.9	(1.25 - 2.89)	0.00254489
TMEM104	1.9	(1.22 - 2.97)	0.00472773
TMPRSS6	1.9	(1.24 - 2.93)	0.00330348
ZFP3	1.9	(1.28 - 2.83)	0.00146876
ZNF883	1.9	(1.22 - 2.96)	0.00428058
AGTPBP1	1.89	(1.25 - 2.86)	0.00273817
AMD1	1.89	(1.19 - 2.98)	0.0064555
ATP5MK	1.89	(1.21 - 2.95)	0.00478382
BRMS1L	1.89	(1.24 - 2.88)	0.00301718
CLTA	1.89	(1.13 - 3.17)	0.0148718
CPSF2	1.89	(1.2 - 2.97)	0.00606307
CYRIB	1.89	(1.26 - 2.83)	0.00214417
DUS3L	1.89	(1.12 - 3.2)	0.017463
EIF5A2	1.89	(1.18 - 3.02)	0.00792126
GPT2	1.89	(1.12 - 3.17)	0.0165661
KIF20B	1.89	(1.16 - 3.06)	0.00990543
MAGEC1	1.89	(1.23 - 2.91)	0.00392717
NOL11	1.89	(1.16 - 3.08)	0.011166
NUP50	1.89	(1.19 - 3.01)	0.00738227
PHAX	1.89	(1.27 - 2.81)	0.00174479
PRR20A	1.89	(1.25 - 2.85)	0.00238394
PRR20B	1.89	(1.25 - 2.85)	0.00238394
PRR20C	1.89	(1.25 - 2.85)	0.00238394
PRR20D	1.89	(1.25 - 2.85)	0.00238394
PRR20E	1.89	(1.25 - 2.85)	0.00238394
RPS18	1.89	(1.1 - 3.25)	0.0214432
SLCO4A1	1.89	(1.1 - 3.25)	0.021361
TFAP2D	1.89	(1.17 - 3.08)	0.00986665
TMEM253	1.89	(1.18 - 3.04)	0.00841684
UBE2I	1.89	(1.18 - 3.02)	0.0078597
UBQLN1	1.89	(1.26 - 2.83)	0.00192406
XKR5	1.89	(1.08 - 3.31)	0.0261251
ZNF511	1.89	(1.14 - 3.12)	0.0128845
ADD3	1.88	(1.23 - 2.87)	0.00369804
ADGRA3	1.88	(1.12 - 3.18)	0.0176799
B4GALT4	1.88	(1.18 - 3)	0.00817934
BOLA1	1.88	(1.15 - 3.06)	0.0119281
C20orf85	1.88	(1.16 - 3.05)	0.00991672
CHUK	1.88	(1.25 - 2.82)	0.00240469
CTU2	1.88	(1.19 - 2.99)	0.00714232
DDX18	1.88	(1.18 - 2.98)	0.00781238
FAF2	1.88	(1.2 - 2.95)	0.00612911
HMGB1	1.88	(1.2 - 2.94)	0.00549441
HNRNPH2	1.88	(1.2 - 2.92)	0.00537274
KATNA1	1.88	(1.27 - 2.8)	0.00179346
KNTC1	1.88	(1.12 - 3.17)	0.0173444
KRTCAP2	1.88	(1.12 - 3.16)	0.0174125
LIPC	1.88	(1.23 - 2.86)	0.00337507
MAGOH	1.88	(1.23 - 2.85)	0.00327699
MNAT1	1.88	(1.1 - 3.22)	0.0204961
MRPS22	1.88	(1.18 - 2.98)	0.00787577
MYDGF	1.88	(1.08 - 3.25)	0.0246208
NDUFA13	1.88	(1.21 - 2.93)	0.00520181
NRAS	1.88	(1.16 - 3.05)	0.010256
PDCD6	1.88	(1.23 - 2.88)	0.00372103
PPHLN1	1.88	(1.23 - 2.89)	0.00383269
PPP5C	1.88	(1.2 - 2.93)	0.00585689
PRAMEF4	1.88	(1.1 - 3.21)	0.020466
PSMD6	1.88	(1.21 - 2.94)	0.00535836
PTPDC1	1.88	(1.15 - 3.09)	0.0122722
PUDP	1.88	(1.23 - 2.87)	0.00363255
RDM1	1.88	(1.25 - 2.85)	0.00266993
RECQL4	1.88	(1.18 - 2.99)	0.00766579
RNF4	1.88	(1.18 - 2.98)	0.00764351
SLC35G1	1.88	(1.13 - 3.14)	0.0150845
SPCS3	1.88	(1.2 - 2.97)	0.00611434
TBCK	1.88	(1.2 - 2.94)	0.00581779
TCEAL9	1.88	(1.2 - 2.96)	0.00605558
THNSL1	1.88	(1.19 - 2.97)	0.00673489
TIMM8A	1.88	(1 - 3.53)	0.0504563
TMEM167A	1.88	(1.23 - 2.87)	0.0035635
UTP14C	1.88	(1.25 - 2.82)	0.00244802
WDR75	1.88	(1.17 - 3.02)	0.0091012
ZC3H13	1.88	(1.21 - 2.92)	0.00479544
ZNF260	1.88	(1.18 - 2.98)	0.00768011
ZNF616	1.88	(1.16 - 3.04)	0.0108
ZNF678	1.88	(1.23 - 2.86)	0.00337994
ZP4	1.88	(0.59 - 6.03)	0.289148
AARD	1.87	(1.19 - 2.95)	0.00696522
ABHD17A	1.87	(1.18 - 2.96)	0.00729939
BCAS2	1.87	(1.24 - 2.83)	0.00308194
BRCC3	1.87	(1.22 - 2.88)	0.00429142
CCNG1	1.87	(1.16 - 3.02)	0.010118
CDC25B	1.87	(1.24 - 2.83)	0.00307842
CETN3	1.87	(1.17 - 2.98)	0.00859687
CRABP2	1.87	(1.22 - 2.86)	0.00396015
CTPS2	1.87	(1.16 - 3.03)	0.0106602
CWC27	1.87	(1.22 - 2.86)	0.00388597
DNAH6	1.87	(1.24 - 2.81)	0.00279923
FANCC	1.87	(1.24 - 2.82)	0.00295967
GPR89A	1.87	(1.24 - 2.84)	0.00300369
H2AC11	1.87	(1.18 - 2.96)	0.0080568
HNRNPA0	1.87	(1.15 - 3.05)	0.0117903
HNRNPU	1.87	(1.19 - 2.94)	0.00673042
MED6	1.87	(1.2 - 2.94)	0.00617278
MRPL43	1.87	(1.21 - 2.89)	0.00489897
MTFR1	1.87	(1.16 - 3.03)	0.0102849
MZT1	1.87	(1.24 - 2.8)	0.00255515
ODR4	1.87	(1.21 - 2.87)	0.00441129
OR2M2	1.87	(0.67 - 5.21)	0.232764
PCYT2	1.87	(1.09 - 3.22)	0.0236748
PIGM	1.87	(1.11 - 3.15)	0.0194049
PPP3R1	1.87	(1.22 - 2.88)	0.00418652
PTGES3	1.87	(1.18 - 2.96)	0.00770827
RAMAC	1.87	(1.19 - 2.93)	0.00621616
REC8	1.87	(1.23 - 2.84)	0.00318386
REG3A	1.87	(0.26 - 13.58)	0.534047
RPA2	1.87	(1.2 - 2.92)	0.00592973
RPS24	1.87	(1.13 - 3.08)	0.0144888
RPS4X	1.87	(1.08 - 3.23)	0.0256843
SCAMP4	1.87	(1.25 - 2.82)	0.00251666
SIRT6	1.87	(1.21 - 2.88)	0.00463917
SLC1A6	1.87	(1.21 - 2.88)	0.0047597
SLC30A5	1.87	(1.13 - 3.07)	0.013942
SPOUT1	1.87	(1.2 - 2.91)	0.00534165
SPTY2D1	1.87	(1.21 - 2.9)	0.00510188
SUMO1	1.87	(1.23 - 2.86)	0.00348871
SUPT3H	1.87	(1.2 - 2.9)	0.00551766
SYNCRIP	1.87	(1.16 - 3.03)	0.0101978
TMEM216	1.87	(1.04 - 3.37)	0.0374819
TOX4	1.87	(1.2 - 2.91)	0.00531197
URM1	1.87	(1.19 - 2.96)	0.00716504
ZNF213	1.87	(1.25 - 2.8)	0.00230947
ZNRD2	1.87	(1.12 - 3.12)	0.015878
C5orf15	1.86	(1.24 - 2.79)	0.0026651
CCDC15	1.86	(1.18 - 2.94)	0.00764632
CEP83	1.86	(1.24 - 2.81)	0.00298694
CHCHD2	1.86	(1.19 - 2.89)	0.00610877
CSNK2A2	1.86	(1.11 - 3.12)	0.0181182
CYP27B1	1.86	(1.11 - 3.11)	0.0180213
DYNLL1	1.86	(1.24 - 2.8)	0.0027664
ELMOD2	1.86	(1.16 - 2.98)	0.00953296
EYS	1.86	(1.21 - 2.84)	0.00427527
FOXI1	1.86	(1.02 - 3.4)	0.0441407
H3C4	1.86	(1.16 - 2.97)	0.00939487
KCNT2	1.86	(1.21 - 2.88)	0.00502331
MRPS36	1.86	(1.19 - 2.88)	0.00591684
MTHFD1L	1.86	(1.1 - 3.16)	0.0208111
NSD1	1.86	(1.24 - 2.8)	0.00286178
OR2B6	1.86	(1.21 - 2.86)	0.00473915
OR52E4	1.86	(1.11 - 3.13)	0.018551
OR52E8	1.86	(0.75 - 4.61)	0.180524
PABPC4	1.86	(1.25 - 2.78)	0.00237396
PPA1	1.86	(1.1 - 3.14)	0.0197901
RPN1	1.86	(1.11 - 3.12)	0.0181366
RTCB	1.86	(1.22 - 2.83)	0.0036208
SCFD1	1.86	(1.24 - 2.79)	0.00292413
SLAIN2	1.86	(1.23 - 2.81)	0.00321137
TMEM208	1.86	(1.17 - 2.93)	0.00823571
TXLNG	1.86	(1.1 - 3.15)	0.0213455
UTP18	1.86	(1.12 - 3.07)	0.0155809
WDR3	1.86	(1.13 - 3.05)	0.0144475
ZNF581	1.86	(1.07 - 3.23)	0.0285877
ARL13B	1.85	(1.23 - 2.8)	0.00333552
DAXX	1.85	(1.08 - 3.18)	0.0257817
DHFR2	1.85	(1.18 - 2.9)	0.00721189
DLD	1.85	(1.23 - 2.79)	0.00324103
DMRT1	1.85	(0.85 - 4.01)	0.121509
ENKUR	1.85	(1.24 - 2.77)	0.00281239
EXOSC4	1.85	(1.09 - 3.15)	0.0228899
FANCF	1.85	(1.12 - 3.05)	0.0165615
GTSE1	1.85	(1.13 - 3.04)	0.0149726
HAX1	1.85	(1.08 - 3.15)	0.0239409
HES6	1.85	(1.16 - 2.95)	0.0102834
HIF1A	1.85	(1.19 - 2.86)	0.00590411
INO80C	1.85	(1.15 - 2.97)	0.0107191
JKAMP	1.85	(1.19 - 2.88)	0.00651496
KIF5B	1.85	(1.25 - 2.75)	0.00212482
LGR5	1.85	(1.14 - 3)	0.012657
OR5H6	1.85	(0.25 - 13.5)	0.545325
OR8I2	1.85	(0.25 - 13.43)	0.543887
PSMG1	1.85	(1.05 - 3.28)	0.0339071
RNF2	1.85	(1.23 - 2.78)	0.00322479
RPS6KB2	1.85	(1.2 - 2.84)	0.0052012
RYK	1.85	(1.07 - 3.17)	0.0267083
SDHAF1	1.85	(1.16 - 2.95)	0.0103285
SDHC	1.85	(1.15 - 2.99)	0.0109951
SEPTIN11	1.85	(1.19 - 2.88)	0.00668702
SF3B5	1.85	(1.13 - 3.05)	0.0153226
SKIC8	1.85	(1.21 - 2.83)	0.00427301
SNRPD3	1.85	(1.22 - 2.82)	0.00398504
SRFBP1	1.85	(1.16 - 2.96)	0.0103788
TMEM147	1.85	(1.11 - 3.1)	0.0185684
TOE1	1.85	(1.21 - 2.83)	0.00468811
USP26	1.85	(0.89 - 3.85)	0.0993322
VKORC1	1.85	(0.97 - 3.54)	0.0628905
XXYLT1	1.85	(1.18 - 2.92)	0.00779959
ZBTB1	1.85	(1.23 - 2.79)	0.00306235
ZBTB12	1.85	(1.05 - 3.24)	0.0324511
ZNF330	1.85	(1.12 - 3.04)	0.0159878
ZNF695	1.85	(1.05 - 3.28)	0.0335187
ALKBH7	1.84	(1.11 - 3.05)	0.018017
ANAPC16	1.84	(1.22 - 2.75)	0.00325939
ATP5MJ	1.84	(1.01 - 3.36)	0.0470495
ATP6V1G1	1.84	(1.21 - 2.8)	0.00415706
BEND4	1.84	(1.1 - 3.08)	0.0210871
BRWD3	1.84	(1.2 - 2.83)	0.00560356
CIAO2B	1.84	(1.14 - 2.95)	0.0119558
CSNK1G2	1.84	(1.21 - 2.8)	0.00406708
DDX19B	1.84	(1.18 - 2.86)	0.00684469
DUSP4	1.84	(1.1 - 3.08)	0.0201466
EEF1G	1.84	(1.04 - 3.27)	0.0362611
ELFN2	1.84	(1.07 - 3.17)	0.0267713
ERCC2	1.84	(1.16 - 2.93)	0.00985771
EXOSC5	1.84	(1.04 - 3.26)	0.036817
FH	1.84	(1.15 - 2.95)	0.0105008
FKBP1A	1.84	(1.19 - 2.83)	0.00558544
FXR1	1.84	(1.18 - 2.88)	0.00739257
GSPT1	1.84	(1.16 - 2.93)	0.0102414
HPRT1	1.84	(1.17 - 2.89)	0.0078377
ISL2	1.84	(1.24 - 2.75)	0.00265098
KCNA6	1.84	(1.24 - 2.73)	0.00246839
KLK12	1.84	(0.68 - 5.03)	0.231685
LSM12	1.84	(1.15 - 2.94)	0.0104245
MLX	1.84	(1.21 - 2.79)	0.00420832
MRPL28	1.84	(1.19 - 2.87)	0.00665873
MYLK2	1.84	(1.18 - 2.87)	0.00706468
NMU	1.84	(1.03 - 3.29)	0.0409045
PEDS1	1.84	(1.21 - 2.79)	0.0040949
PET100	1.84	(1.18 - 2.86)	0.00680421
PHF6	1.84	(1.15 - 2.95)	0.0112199
PITPNB	1.84	(1.2 - 2.82)	0.00502658
PNPLA4	1.84	(1.21 - 2.81)	0.0043956
PRIM1	1.84	(1.06 - 3.21)	0.0309271
SDK2	1.84	(1.19 - 2.83)	0.00600403
SEC23A	1.84	(1.19 - 2.84)	0.00608181
SEC24D	1.84	(1.24 - 2.74)	0.002658
SEC61G	1.84	(1.2 - 2.84)	0.00535817
SEC63	1.84	(1.15 - 2.93)	0.0102509
SPATA33	1.84	(1.1 - 3.09)	0.0210696
TACR3	1.84	(1.23 - 2.76)	0.00328144
THAP10	1.84	(1.17 - 2.91)	0.00888967
TMEM184C	1.84	(1.21 - 2.82)	0.004808
TSSC4	1.84	(1.11 - 3.07)	0.0187402
VPS35	1.84	(1.23 - 2.75)	0.00314421
WEE1	1.84	(1.12 - 3.02)	0.0152161
ZBED4	1.84	(1.16 - 2.93)	0.00931467
ZNF146	1.84	(1.12 - 3.02)	0.0164537
ZNF230	1.84	(1.2 - 2.83)	0.00502209
ZNF595	1.84	(1.11 - 3.05)	0.0172861
ZNF638	1.84	(1.24 - 2.74)	0.00255469
ARPP19	1.83	(1.23 - 2.73)	0.00288036
ATP7A	1.83	(1.23 - 2.74)	0.00314845
C2orf49	1.83	(1.22 - 2.75)	0.00344764
C8orf48	1.83	(1.17 - 2.85)	0.0081585
CAMTA1	1.83	(1.21 - 2.78)	0.00424947
CARS2	1.83	(1.22 - 2.74)	0.00325873
CNOT7	1.83	(1.16 - 2.89)	0.00900284
DCP2	1.83	(1.23 - 2.74)	0.00314429
DIS3L	1.83	(1.22 - 2.76)	0.00354028
DNAJC24	1.83	(1.19 - 2.83)	0.00631509
ENKD1	1.83	(1.16 - 2.89)	0.00899445
ESRRA	1.83	(1.04 - 3.2)	0.0345149
F8A1	1.83	(1.13 - 2.95)	0.0134303
GFI1B	1.83	(1.23 - 2.71)	0.00279214
GLO1	1.83	(1.21 - 2.76)	0.00416104
GPR50	1.83	(1.22 - 2.72)	0.0031289
GSPT2	1.83	(1.17 - 2.86)	0.0086125
H2AC17	1.83	(1.13 - 2.96)	0.013943
HINT2	1.83	(1.14 - 2.95)	0.0124224
HNRNPH3	1.83	(1.15 - 2.9)	0.0107442
HP	1.83	(1.21 - 2.78)	0.00448726
IDH3A	1.83	(1.2 - 2.8)	0.00518391
IRAK1BP1	1.83	(1.21 - 2.78)	0.00450795
ISCA2	1.83	(1.16 - 2.9)	0.00981338
ITPRIPL1	1.83	(1.04 - 3.21)	0.0345587
KMT5A	1.83	(1.2 - 2.79)	0.00492166
MED26	1.83	(1.12 - 2.99)	0.0156697
MOB4	1.83	(1.23 - 2.72)	0.0029002
NAA20	1.83	(1.21 - 2.76)	0.00433866
PCGF6	1.83	(1.12 - 2.99)	0.0165537
RPL10L	1.83	(0.83 - 4.04)	0.136104
RPL12	1.83	(1.09 - 3.06)	0.0227541
SELENOI	1.83	(1.2 - 2.78)	0.00461271
SEPHS2	1.83	(1.18 - 2.84)	0.00740868
SHMT2	1.83	(1.13 - 2.97)	0.0142745
SMC1A	1.83	(1.15 - 2.9)	0.0101402
SSX5	1.83	(1.05 - 3.18)	0.033039
THAP6	1.83	(1.12 - 2.98)	0.015514
THUMPD2	1.83	(1.15 - 2.9)	0.0104447
TIPRL	1.83	(1.2 - 2.81)	0.00530831
TMEM38A	1.83	(1.21 - 2.76)	0.00408332
TSN	1.83	(1.18 - 2.86)	0.00752031
YIF1A	1.83	(1.03 - 3.26)	0.0391911
ZNF787	1.83	(1.05 - 3.19)	0.034211
AHSA1	1.82	(1.1 - 3.02)	0.0205092
APH1A	1.82	(1.11 - 3)	0.0176368
BMP7	1.82	(1.15 - 2.87)	0.010435
BORA	1.82	(1.21 - 2.74)	0.00429303
CARD18	1.82	(0.95 - 3.5)	0.0731708
CCNK	1.82	(1.13 - 2.94)	0.0134115
CCP110	1.82	(1.16 - 2.85)	0.00872795
CFAP36	1.82	(1.21 - 2.72)	0.00370698
COPB1	1.82	(1.19 - 2.79)	0.00551343
COPS5	1.82	(1.21 - 2.72)	0.00388038
CTAGE15	1.82	(1.22 - 2.72)	0.00358902
DYRK4	1.82	(1.2 - 2.76)	0.00495217
EBNA1BP2	1.82	(1.2 - 2.75)	0.00492274
EIF4EBP1	1.82	(1.02 - 3.25)	0.0417843
ETF1	1.82	(1.18 - 2.81)	0.00700679
FAM161A	1.82	(1.21 - 2.74)	0.00385857
GHITM	1.82	(1.19 - 2.8)	0.00595608
HSPA8	1.82	(1.1 - 3.02)	0.0197095
LRPPRC	1.82	(1.13 - 2.93)	0.0144643
MEX3D	1.82	(1.12 - 2.96)	0.0162824
MPV17L	1.82	(1.06 - 3.11)	0.0292535
MRPS10	1.82	(1.2 - 2.75)	0.00449176
NEPRO	1.82	(1.11 - 2.97)	0.0170604
OR51B2	1.82	(0.91 - 3.63)	0.0912295
OR52E2	1.82	(0.57 - 5.78)	0.312426
PLGRKT	1.82	(1.18 - 2.82)	0.00695716
PRM2	1.82	(0.44 - 7.49)	0.40743
RAB5IF	1.82	(1.1 - 3.02)	0.0207957
RRN3	1.82	(1.15 - 2.87)	0.0108991
SNX5	1.82	(1.1 - 3)	0.0192285
TEDC2	1.82	(1.08 - 3.05)	0.0237322
UGT2A1	1.82	(1.14 - 2.89)	0.0119069
USP1	1.82	(1.21 - 2.73)	0.00423706
USP9X	1.82	(1.16 - 2.87)	0.00971899
ZNF138	1.82	(1.16 - 2.87)	0.0096542
ZNF561	1.82	(1.09 - 3.03)	0.0218061
ARHGEF38	1.81	(1.19 - 2.78)	0.00600493
BLOC1S5	1.81	(1.21 - 2.69)	0.00355146
CCDC168	1.81	(1.17 - 2.8)	0.0074112
CCSER1	1.81	(1.13 - 2.89)	0.0130754
CDC42	1.81	(1.11 - 2.94)	0.0170275
COPS8	1.81	(1.22 - 2.68)	0.00298615
EIF2AK1	1.81	(1.17 - 2.78)	0.00722188
FAAP24	1.81	(1.03 - 3.19)	0.0383136
GPAM	1.81	(1.2 - 2.71)	0.00431855
GPR137	1.81	(1.16 - 2.84)	0.0090386
GRPEL1	1.81	(1.05 - 3.14)	0.0342652
GTF3C4	1.81	(1.18 - 2.78)	0.00694624
MAGEB1	1.81	(1.18 - 2.77)	0.00654552
MRPL42	1.81	(1.12 - 2.94)	0.0163955
OR52H1	1.81	(0.89 - 3.67)	0.102086
ORC5	1.81	(1.19 - 2.74)	0.00568399
POLR1E	1.81	(1.06 - 3.1)	0.0303528
PXYLP1	1.81	(1.15 - 2.86)	0.010603
RHOA	1.81	(1.16 - 2.82)	0.00840663
RPL18A	1.81	(1.04 - 3.12)	0.0343416
RPS29	1.81	(1.01 - 3.25)	0.0461867
RTL8B	1.81	(1.05 - 3.12)	0.0334432
SAP18	1.81	(1.21 - 2.72)	0.00427374
UBXN2A	1.81	(1.2 - 2.74)	0.00458412
USP14	1.81	(1.2 - 2.72)	0.00445546
YBX1	1.81	(1.2 - 2.72)	0.00431596
ZNF131	1.81	(1.2 - 2.72)	0.00442823
APLF	1.8	(1.21 - 2.68)	0.00382241
BMS1	1.8	(1.16 - 2.77)	0.00835307
CFHR5	1.8	(1.21 - 2.67)	0.00376129
CRIPT	1.8	(1.2 - 2.72)	0.00478841
CTAGE9	1.8	(1.2 - 2.69)	0.00427844
DNAJC19	1.8	(1.13 - 2.88)	0.0134182
DNMT1	1.8	(1.11 - 2.91)	0.0176366
HPDL	1.8	(1.06 - 3.05)	0.0305404
LRRIQ1	1.8	(1.17 - 2.75)	0.00688668
MAGEB16	1.8	(1.07 - 3.03)	0.0280898
MAP3K13	1.8	(1.2 - 2.71)	0.0046697
MPHOSPH10	1.8	(1.17 - 2.77)	0.00752564
MRPL14	1.8	(1.03 - 3.12)	0.0378114
MRPL57	1.8	(1.09 - 2.95)	0.0204914
NAP1L4	1.8	(1.11 - 2.91)	0.0177539
NHEJ1	1.8	(1.04 - 3.1)	0.035573
OR9I1	1.8	(0.25 - 13.02)	0.561847
PLEKHG4B	1.8	(1.07 - 3.02)	0.0271118
PRAMEF15	1.8	(1.05 - 3.09)	0.0331964
RPL31	1.8	(1.09 - 2.97)	0.0212972
RPS14	1.8	(1.03 - 3.15)	0.039695
RRS1	1.8	(1.03 - 3.16)	0.0407562
SAFB	1.8	(1.08 - 2.97)	0.0228788
SERPINB4	1.8	(0.98 - 3.3)	0.0581606
SRSF10	1.8	(1.17 - 2.77)	0.00772474
TRAF2	1.8	(1.16 - 2.8)	0.00852937
TRAPPC9	1.8	(1.17 - 2.78)	0.00723515
UBE2A	1.8	(1.15 - 2.81)	0.0101202
UBL4B	1.8	(1.18 - 2.76)	0.00679763
ULBP3	1.8	(1.21 - 2.67)	0.00364197
ZFR	1.8	(1.21 - 2.67)	0.00366825
AKT1S1	1.79	(1.07 - 3.02)	0.0277456
BEX1	1.79	(1.02 - 3.13)	0.0410701
BMP2K	1.79	(1.2 - 2.66)	0.00416162
C1orf131	1.79	(1.15 - 2.78)	0.00976341
CCDC47	1.79	(1.1 - 2.89)	0.0185608
CENPM	1.79	(1.01 - 3.17)	0.0460581
CFAP57	1.79	(1.17 - 2.74)	0.00758083
CNIH1	1.79	(1.15 - 2.8)	0.010412
CRY1	1.79	(1.17 - 2.75)	0.0076991
EFNB2	1.79	(1.1 - 2.92)	0.019576
EIF3J	1.79	(1.14 - 2.8)	0.0107517
EIF6	1.79	(1.17 - 2.76)	0.00773633
FBXO8	1.79	(1.1 - 2.91)	0.0192447
FCGR3A	1.79	(1.13 - 2.84)	0.0127459
FUBP3	1.79	(1.17 - 2.73)	0.00680886
GALNS	1.79	(1.15 - 2.8)	0.00995759
GATC	1.79	(1.16 - 2.77)	0.00840943
GMFB	1.79	(1.19 - 2.7)	0.00548509
GPR139	1.79	(1.19 - 2.7)	0.0051608
IL5RA	1.79	(1.21 - 2.66)	0.00380015
INSM2	1.79	(1.12 - 2.85)	0.0149626
LDHB	1.79	(1.03 - 3.09)	0.0384138
LMAN2	1.79	(1.12 - 2.88)	0.015422
MALSU1	1.79	(1.17 - 2.74)	0.00777328
MCU	1.79	(1.19 - 2.7)	0.00515346
MRPS35	1.79	(1.13 - 2.84)	0.0137822
NOSIP	1.79	(1.14 - 2.82)	0.0114208
OR2A2	1.79	(0.9 - 3.56)	0.0990061
OR51V1	1.79	(0.25 - 13.05)	0.564222
OTOS	1.79	(0.65 - 4.92)	0.259571
PBOV1	1.79	(1.15 - 2.81)	0.0106844
PDE12	1.79	(1.16 - 2.77)	0.0089502
POLR1F	1.79	(1.18 - 2.71)	0.00635339
PPM1B	1.79	(1.21 - 2.67)	0.00397587
PPP4R2	1.79	(1.17 - 2.74)	0.00775161
PRKRA	1.79	(1.19 - 2.68)	0.00521013
[truncated: 16,461 more rows]

## Sheet: Fig_S1k_Coxph_ECDF
factor.name	HR	95% CI	P value
KRTCAP2	4.34	(2.55 - 7.38)	6.22779e-08
SLC35A4	3.83	(2.4 - 6.11)	1.95411e-08
C19orf52	3.38	(2.07 - 5.5)	1.06202e-06
TECR	3.33	(2.05 - 5.41)	1.21354e-06
SPNS1	3.3	(2.08 - 5.24)	4.39357e-07
TAF10	3.24	(1.94 - 5.42)	7.4448e-06
IPO4	3.16	(1.81 - 5.54)	5.43426e-05
NXT1	3.15	(1.89 - 5.27)	1.15202e-05
SEC61A1	3.11	(1.97 - 4.92)	1.20087e-06
CCDC86	3.1	(1.77 - 5.43)	7.26626e-05
RARA	3.09	(2.04 - 4.66)	8.67513e-08
SLC52A2	3.08	(2.02 - 4.7)	1.77569e-07
SESN2	3.02	(2.02 - 4.51)	6.5077e-08
TPGS1	2.99	(1.91 - 4.69)	1.83018e-06
GRWD1	2.94	(1.75 - 4.91)	4.11543e-05
FAM207A	2.93	(1.8 - 4.77)	1.62908e-05
SSNA1	2.93	(1.83 - 4.69)	8.24473e-06
BRI3	2.91	(1.94 - 4.35)	2.19388e-07
WDR24	2.91	(1.82 - 4.65)	8.53546e-06
ADRM1	2.9	(1.89 - 4.46)	1.24851e-06
CD320	2.9	(1.77 - 4.75)	2.44163e-05
ZNF628	2.87	(1.9 - 4.35)	5.67704e-07
TMUB1	2.86	(1.88 - 4.35)	1.00252e-06
NR2F6	2.85	(1.92 - 4.22)	1.91613e-07
YRDC	2.82	(1.83 - 4.34)	2.77805e-06
AP1M1	2.8	(1.91 - 4.11)	1.26473e-07
SNAPC2	2.8	(1.89 - 4.15)	2.5362e-07
TACC3	2.79	(1.77 - 4.4)	9.98034e-06
ZDHHC12	2.75	(1.82 - 4.16)	1.60657e-06
MESDC1	2.74	(1.8 - 4.16)	2.47705e-06
MIER2	2.72	(1.81 - 4.08)	1.44142e-06
ALYREF	2.71	(1.65 - 4.44)	8.23314e-05
PPM1F	2.71	(1.8 - 4.06)	1.59268e-06
BAIAP2	2.7	(1.81 - 4.02)	1.2395e-06
MRPS2	2.7	(1.72 - 4.24)	1.7111e-05
SLC16A1	2.7	(1.62 - 4.49)	0.000129521
ZNF579	2.69	(1.81 - 3.99)	8.4769e-07
MED16	2.68	(1.76 - 4.07)	3.78378e-06
HK2	2.66	(1.59 - 4.46)	0.000198054
WDR74	2.66	(1.51 - 4.69)	0.000711223
GNB2	2.65	(1.8 - 3.9)	8.41712e-07
ALG3	2.63	(1.57 - 4.4)	0.000238322
SLC39A11	2.63	(1.66 - 4.18)	4.16978e-05
ADAT3	2.61	(1.69 - 4.03)	1.38882e-05
AKT1S1	2.61	(1.66 - 4.12)	3.55886e-05
TIMM50	2.61	(1.62 - 4.2)	8.48288e-05
GALNS	2.6	(1.74 - 3.88)	2.82823e-06
KRBA1	2.6	(1.75 - 3.85)	1.92031e-06
TMEM104	2.6	(1.72 - 3.94)	6.56028e-06
TMEM222	2.6	(1.72 - 3.92)	5.25098e-06
SMARCA4	2.58	(1.7 - 3.9)	7.94751e-06
TBC1D22A	2.58	(1.74 - 3.82)	2.225e-06
HIST1H2AM	2.57	(1.6 - 4.13)	9.47584e-05
MRPL11	2.57	(1.47 - 4.5)	0.000933617
NOC2L	2.57	(1.74 - 3.8)	1.91412e-06
CHGA	2.56	(1.71 - 3.84)	5.5527e-06
CORO1B	2.56	(1.64 - 4)	3.46945e-05
MAD1L1	2.56	(1.76 - 3.73)	9.74779e-07
MRPS12	2.56	(1.54 - 4.26)	0.000309039
GTPBP3	2.54	(1.53 - 4.19)	0.000283523
ALDH16A1	2.53	(1.65 - 3.88)	2.08273e-05
CLDN3	2.52	(1.72 - 3.7)	1.94511e-06
VASP	2.51	(1.67 - 3.78)	9.93998e-06
ZNF668	2.51	(1.6 - 3.93)	5.89193e-05
BRE	2.5	(1.7 - 3.67)	3.08368e-06
TSSC4	2.5	(1.55 - 4.02)	0.000155204
LENG1	2.49	(1.58 - 3.93)	9.10237e-05
SLC35A2	2.49	(1.55 - 3.98)	0.000147844
DGKZ	2.47	(1.64 - 3.73)	1.70064e-05
HIGD2A	2.47	(1.58 - 3.88)	8.0963e-05
FAM173A	2.46	(1.63 - 3.71)	1.9114e-05
LETM1	2.46	(1.51 - 4.02)	0.000313279
MDH2	2.46	(1.6 - 3.78)	4.20285e-05
SIPA1L3	2.46	(1.51 - 4.01)	0.000288523
WDR62	2.46	(1.62 - 3.76)	2.78533e-05
BSG	2.45	(1.56 - 3.84)	9.69119e-05
DEXI	2.45	(1.63 - 3.69)	1.49061e-05
MAP2K2	2.45	(1.54 - 3.91)	0.000159732
PSMG3	2.45	(1.65 - 3.63)	7.76093e-06
UBE2M	2.45	(1.64 - 3.66)	1.16542e-05
ABCD1	2.44	(1.63 - 3.65)	1.4617e-05
C12orf10	2.44	(1.6 - 3.71)	3.45564e-05
FAM65A	2.44	(1.67 - 3.56)	3.72615e-06
SPERT	2.44	(1.55 - 3.83)	0.000112817
VPS4A	2.44	(1.61 - 3.7)	2.86991e-05
MLF2	2.43	(1.63 - 3.63)	1.38655e-05
POR	2.43	(1.66 - 3.55)	4.79155e-06
PPDPF	2.43	(1.66 - 3.53)	3.90601e-06
VKORC1	2.43	(1.5 - 3.94)	0.000335789
ABCF1	2.42	(1.63 - 3.58)	1.01342e-05
MRPS34	2.42	(1.54 - 3.8)	0.000125929
VPS37C	2.42	(1.63 - 3.59)	1.22007e-05
PRAF2	2.41	(1.51 - 3.84)	0.000210482
SLC25A19	2.41	(1.48 - 3.93)	0.000409864
UBE2L3	2.41	(1.6 - 3.62)	2.43196e-05
ARL2	2.4	(1.45 - 3.99)	0.000712342
VGF	2.4	(1.59 - 3.63)	3.01253e-05
COPE	2.39	(1.57 - 3.63)	4.97638e-05
NPLOC4	2.38	(1.6 - 3.55)	1.9454e-05
WBSCR16	2.38	(1.57 - 3.6)	4.04357e-05
ABCC1	2.37	(1.57 - 3.56)	3.66072e-05
MLEC	2.37	(1.63 - 3.46)	7.31749e-06
TMEM198	2.37	(1.59 - 3.52)	1.97924e-05
BCKDHA	2.36	(1.53 - 3.65)	0.000106561
PGLS	2.36	(1.58 - 3.54)	3.19816e-05
PHGDH	2.36	(1.48 - 3.75)	0.000308907
SLC39A3	2.36	(1.44 - 3.88)	0.000694195
BRMS1	2.35	(1.45 - 3.79)	0.000494055
C11orf24	2.35	(1.55 - 3.56)	5.28192e-05
SKI	2.35	(1.62 - 3.4)	5.75834e-06
ATG9A	2.34	(1.62 - 3.39)	6.0102e-06
CCDC22	2.34	(1.51 - 3.62)	0.000134362
RAB40C	2.34	(1.59 - 3.45)	1.69542e-05
SLC1A5	2.34	(1.43 - 3.83)	0.000723218
ZMYND19	2.34	(1.52 - 3.62)	0.000124131
DHODH	2.33	(1.47 - 3.71)	0.000340281
EIF6	2.32	(1.54 - 3.52)	6.38854e-05
LDB3	2.32	(1.59 - 3.38)	1.12546e-05
MOB3A	2.32	(1.6 - 3.37)	9.88696e-06
NAA10	2.31	(1.43 - 3.72)	0.000603739
NECAB3	2.31	(1.59 - 3.35)	1.1741e-05
QPRT	2.31	(1.5 - 3.56)	0.000138956
RAD23A	2.31	(1.52 - 3.51)	8.91336e-05
SAPCD2	2.31	(1.46 - 3.64)	0.000348639
SLC5A6	2.31	(1.53 - 3.49)	6.67979e-05
PLCB3	2.3	(1.54 - 3.43)	4.533e-05
BCORL1	2.29	(1.53 - 3.44)	6.09099e-05
FAM50A	2.29	(1.55 - 3.38)	3.02662e-05
JUND	2.28	(1.54 - 3.37)	3.67913e-05
RNF40	2.28	(1.55 - 3.35)	2.66937e-05
SEZ6L2	2.28	(1.56 - 3.34)	2.33582e-05
SNRPD3	2.28	(1.39 - 3.73)	0.00107172
WDR25	2.28	(1.53 - 3.4)	5.25091e-05
WNT5B	2.28	(1.52 - 3.42)	6.421e-05
ALG12	2.27	(1.56 - 3.31)	1.71028e-05
DCAF4	2.27	(1.38 - 3.74)	0.00130493
MUC1	2.27	(1.51 - 3.4)	7.07831e-05
SAC3D1	2.27	(1.46 - 3.54)	0.000273352
SGTA	2.27	(1.52 - 3.4)	6.1949e-05
TOP3B	2.27	(1.53 - 3.38)	5.35309e-05
BRI3BP	2.26	(1.44 - 3.53)	0.00038836
C19orf70	2.26	(1.48 - 3.47)	0.000178
CABP7	2.26	(1.45 - 3.54)	0.000335501
MTX1	2.26	(1.33 - 3.84)	0.00249683
RRP1	2.26	(1.43 - 3.57)	0.000499773
SRM	2.26	(1.53 - 3.34)	4.04285e-05
CLCN7	2.25	(1.52 - 3.31)	4.24602e-05
LRFN3	2.25	(1.53 - 3.3)	3.50015e-05
PEPD	2.25	(1.51 - 3.35)	7.1789e-05
FIBP	2.24	(1.49 - 3.37)	0.000104019
GADD45GIP1	2.24	(1.4 - 3.57)	0.000737917
ISOC2	2.24	(1.4 - 3.59)	0.000782294
SIL1	2.24	(1.5 - 3.34)	7.80293e-05
SLC25A51	2.24	(1.46 - 3.43)	0.000219954
TIMM17B	2.24	(1.43 - 3.51)	0.000412247
TRIB3	2.24	(1.5 - 3.36)	9.38473e-05
CCNE1	2.23	(1.44 - 3.45)	0.000337022
ENHO	2.23	(1.53 - 3.26)	3.48336e-05
HIP1	2.23	(1.54 - 3.21)	1.74277e-05
LYPLA2	2.23	(1.51 - 3.32)	6.58633e-05
P4HB	2.23	(1.52 - 3.29)	4.27937e-05
RPN2	2.23	(1.53 - 3.25)	3.01836e-05
RRS1	2.23	(1.39 - 3.58)	0.000945043
SLC12A7	2.23	(1.55 - 3.22)	1.61045e-05
SLC7A6	2.23	(1.43 - 3.5)	0.0004381
TOLLIP	2.23	(1.51 - 3.29)	6.01301e-05
NUP214	2.22	(1.51 - 3.25)	4.36184e-05
RBM42	2.22	(1.49 - 3.29)	8.62704e-05
SMPD1	2.22	(1.5 - 3.3)	7.22108e-05
TRIM11	2.22	(1.52 - 3.23)	3.65488e-05
DPP3	2.21	(1.47 - 3.34)	0.00014506
GIPC1	2.21	(1.47 - 3.33)	0.00015267
HIST1H2BK	2.21	(1.41 - 3.45)	0.000523864
HM13	2.21	(1.45 - 3.38)	0.000242808
PARVB	2.21	(1.43 - 3.41)	0.000349974
RABL6	2.21	(1.47 - 3.32)	0.000125138
ZNF777	2.21	(1.41 - 3.47)	0.000517152
BTBD2	2.2	(1.46 - 3.32)	0.000180982
C15orf39	2.2	(1.42 - 3.41)	0.000450603
CCDC9	2.2	(1.48 - 3.26)	9.11689e-05
CHMP1A	2.2	(1.51 - 3.21)	3.76579e-05
CORO7	2.2	(1.52 - 3.2)	3.24118e-05
GTPBP1	2.2	(1.36 - 3.56)	0.00128756
SLC25A23	2.2	(1.45 - 3.34)	0.000201675
TSPAN14	2.2	(1.5 - 3.24)	6.00183e-05
ATP5G2	2.19	(1.46 - 3.28)	0.000144694
CTU2	2.19	(1.42 - 3.39)	0.000400172
FKBP1A	2.19	(1.48 - 3.24)	8.14908e-05
MAP1S	2.19	(1.51 - 3.17)	3.46625e-05
MCOLN1	2.19	(1.47 - 3.26)	0.000110945
MOGS	2.19	(1.5 - 3.2)	4.43837e-05
MYBBP1A	2.19	(1.5 - 3.22)	5.92477e-05
R3HDM4	2.19	(1.52 - 3.16)	2.79447e-05
SLC39A4	2.19	(1.39 - 3.45)	0.000753496
C10orf90	2.18	(1.43 - 3.32)	0.000296705
DEDD2	2.18	(1.48 - 3.19)	6.76384e-05
SCAND1	2.18	(1.4 - 3.42)	0.000632868
ZNF581	2.18	(1.36 - 3.5)	0.00118741
DHX37	2.17	(1.36 - 3.47)	0.00112765
GRHPR	2.17	(1.47 - 3.2)	9.63013e-05
MRPL52	2.17	(1.32 - 3.57)	0.00231339
PES1	2.17	(1.38 - 3.41)	0.000751504
PRKACA	2.17	(1.48 - 3.18)	7.55127e-05
SLC25A1	2.17	(1.49 - 3.16)	5.60853e-05
XKR8	2.17	(1.47 - 3.19)	8.81547e-05
ARHGEF18	2.16	(1.44 - 3.24)	0.000185615
CHMP6	2.16	(1.45 - 3.21)	0.000152054
CHST14	2.16	(1.39 - 3.38)	0.000685471
CTDP1	2.16	(1.46 - 3.21)	0.000117638
DDX39A	2.16	(1.39 - 3.34)	0.000553393
SDK2	2.16	(1.49 - 3.13)	4.74442e-05
VAC14	2.16	(1.47 - 3.18)	8.07263e-05
HIST1H4G	2.15	(1.43 - 3.23)	0.000245762
TSPAN33	2.15	(1.42 - 3.25)	0.000305297
TTLL12	2.15	(1.36 - 3.4)	0.00100029
A1BG	2.14	(1.33 - 3.45)	0.00183441
EIF3B	2.14	(1.41 - 3.26)	0.000352336
ENO1	2.14	(1.42 - 3.22)	0.000257751
MAP3K11	2.14	(1.46 - 3.14)	9.49982e-05
SH3TC1	2.14	(1.48 - 3.09)	4.94394e-05
SLC25A39	2.14	(1.37 - 3.33)	0.000747776
CCM2	2.13	(1.4 - 3.24)	0.000397369
CHID1	2.13	(1.38 - 3.28)	0.000624359
CITED4	2.13	(1.47 - 3.09)	5.91978e-05
COMT	2.13	(1.47 - 3.08)	5.68664e-05
GALNT2	2.13	(1.46 - 3.12)	9.37504e-05
MARK2	2.13	(1.46 - 3.11)	7.97481e-05
MKL1	2.13	(1.48 - 3.08)	5.39892e-05
PREB	2.13	(1.45 - 3.12)	0.000107839
RECQL4	2.13	(1.43 - 3.17)	0.000212932
ST6GALNAC4	2.13	(1.38 - 3.3)	0.000625804
C14orf169	2.12	(1.34 - 3.35)	0.00134211
EIF2B4	2.12	(1.45 - 3.11)	0.000112099
HINT2	2.12	(1.36 - 3.3)	0.000944894
LAMP1	2.12	(1.44 - 3.13)	0.000143088
MPV17L2	2.12	(1.4 - 3.23)	0.000433397
RUVBL2	2.12	(1.36 - 3.32)	0.00100031
TOMM22	2.12	(1.35 - 3.33)	0.00107049
USF2	2.12	(1.44 - 3.13)	0.000159332
CHPF2	2.11	(1.45 - 3.08)	9.87575e-05
DISP2	2.11	(1.46 - 3.04)	6.14639e-05
GYS1	2.11	(1.38 - 3.22)	0.000554701
MEGF8	2.11	(1.4 - 3.17)	0.000346235
NOP16	2.11	(1.26 - 3.55)	0.00484682
PPIF	2.11	(1.37 - 3.27)	0.000779629
YIF1A	2.11	(1.35 - 3.31)	0.00109301
ABCB8	2.1	(1.45 - 3.03)	8.88586e-05
CDK2AP2	2.1	(1.39 - 3.18)	0.000452716
CSNK2A1	2.1	(1.36 - 3.23)	0.000822009
DUSP4	2.1	(1.4 - 3.14)	0.000316549
LRRC47	2.1	(1.35 - 3.24)	0.000897498
MARK4	2.1	(1.46 - 3.02)	7.04492e-05
POLR2L	2.1	(1.36 - 3.23)	0.000791436
PPP1R14B	2.1	(1.33 - 3.33)	0.00155794
SCAMP3	2.1	(1.41 - 3.12)	0.000239427
UBE2J2	2.1	(1.35 - 3.28)	0.00107662
ATP13A2	2.09	(1.31 - 3.32)	0.00186392
COPZ1	2.09	(1.4 - 3.13)	0.000336314
HIST1H2BH	2.09	(1.39 - 3.15)	0.000432941
PGAM5	2.09	(1.35 - 3.23)	0.000926404
RNF26	2.09	(1.35 - 3.23)	0.000989108
VWA1	2.09	(1.44 - 3.05)	0.00012377
ZFPM1	2.09	(1.42 - 3.08)	0.000178811
ANKRD9	2.08	(1.41 - 3.09)	0.000256693
ARMC6	2.08	(1.32 - 3.29)	0.00157784
CLU	2.08	(1.33 - 3.25)	0.00133659
DEDD	2.08	(1.38 - 3.13)	0.000439081
FAM3A	2.08	(1.38 - 3.13)	0.000485011
NTHL1	2.08	(1.28 - 3.38)	0.00322078
SAMD1	2.08	(1.4 - 3.11)	0.000326666
SPCS3	2.08	(1.32 - 3.29)	0.00170505
SPHK2	2.08	(1.37 - 3.14)	0.000514978
TPI1	2.08	(1.41 - 3.07)	0.000222727
TRAPPC9	2.08	(1.37 - 3.15)	0.000567117
UHRF1	2.08	(1.29 - 3.35)	0.00282777
AP1B1	2.07	(1.43 - 3.01)	0.000124846
ATP5D	2.07	(1.36 - 3.14)	0.000616329
C11orf84	2.07	(1.35 - 3.17)	0.000908575
CASKIN2	2.07	(1.39 - 3.09)	0.000330273
HSD11B1L	2.07	(1.41 - 3.03)	0.000182923
IFI6	2.07	(1.41 - 3.04)	0.000216416
NAB2	2.07	(1.41 - 3.05)	0.000207669
NUCB1	2.07	(1.42 - 3.01)	0.000166773
PKN3	2.07	(1.41 - 3.04)	0.000221411
URM1	2.07	(1.38 - 3.11)	0.000454783
ZNHIT2	2.07	(1.35 - 3.19)	0.000947149
GLB1L	2.06	(1.41 - 3.01)	0.000169051
GYLTL1B	2.06	(1.41 - 3.01)	0.000187981
ING1	2.06	(1.35 - 3.16)	0.000877485
LMNB2	2.06	(1.3 - 3.26)	0.00198671
PVR	2.06	(1.34 - 3.16)	0.000946639
SMARCD1	2.06	(1.42 - 2.97)	0.000123807
UGGT1	2.06	(1.33 - 3.19)	0.00128548
XAB2	2.06	(1.3 - 3.26)	0.00200574
ZGPAT	2.06	(1.42 - 3)	0.000151771
CNPY3	2.05	(1.34 - 3.15)	0.00103672
DCXR	2.05	(1.35 - 3.13)	0.000809368
DPH2	2.05	(1.39 - 3.02)	0.000270695
ERGIC1	2.05	(1.41 - 2.98)	0.000158863
MUL1	2.05	(1.28 - 3.29)	0.00302029
POLRMT	2.05	(1.35 - 3.11)	0.00073499
PSMC4	2.05	(1.37 - 3.06)	0.000493613
THEM6	2.05	(1.28 - 3.29)	0.00301347
TMEM161A	2.05	(1.3 - 3.23)	0.00202736
ZNF787	2.05	(1.28 - 3.28)	0.00287492
ADAMTS20	2.04	(1.33 - 3.14)	0.00118167
CDK16	2.04	(1.37 - 3.05)	0.000491233
CSNK1G2	2.04	(1.4 - 2.98)	0.000230375
DYSF	2.04	(1.41 - 2.95)	0.000159675
ERBB2	2.04	(1.41 - 2.95)	0.000147068
GAA	2.04	(1.38 - 3.02)	0.000389805
GALE	2.04	(1.36 - 3.04)	0.000536174
GATAD2A	2.04	(1.32 - 3.15)	0.00130025
PCBP1	2.04	(1.42 - 2.93)	0.000110578
PDHA1	2.04	(1.24 - 3.37)	0.00509938
PPP3R1	2.04	(1.38 - 3.01)	0.000365563
SREBF1	2.04	(1.4 - 2.97)	0.000216997
SWSAP1	2.04	(1.32 - 3.15)	0.00136951
TMEM147	2.04	(1.3 - 3.2)	0.00187898
TTYH3	2.04	(1.43 - 2.93)	9.40363e-05
EFCAB11	2.03	(1.22 - 3.37)	0.00635867
EIF2AK1	2.03	(1.37 - 3.01)	0.000447651
FTSJ1	2.03	(1.24 - 3.33)	0.00509698
ZBTB7A	2.03	(1.37 - 2.99)	0.000366118
ZNF503	2.03	(1.34 - 3.08)	0.000806977
COQ9	2.02	(1.32 - 3.08)	0.00120203
FAM189B	2.02	(1.34 - 3.05)	0.000803908
FAM96B	2.02	(1.35 - 3.01)	0.000555718
JMJD4	2.02	(1.33 - 3.06)	0.000933033
KLC2	2.02	(1.38 - 2.94)	0.000265212
MACROD1	2.02	(1.32 - 3.1)	0.00123729
MAGED1	2.02	(1.37 - 2.97)	0.000348992
MPST	2.02	(1.27 - 3.22)	0.00310855
SLC22A25	2.02	(1.25 - 3.27)	0.00399615
SLC9A7	2.02	(1.36 - 2.99)	0.000475947
TMEM59L	2.02	(1.38 - 2.97)	0.000299285
TOMM34	2.02	(1.36 - 3.01)	0.00051404
ZNF574	2.02	(1.35 - 3.03)	0.000628168
AACS	2.01	(1.37 - 2.96)	0.000375257
ALKBH5	2.01	(1.4 - 2.88)	0.0001509
APEX2	2.01	(1.19 - 3.4)	0.00898732
C20orf27	2.01	(1.27 - 3.17)	0.0029101
DPM2	2.01	(1.38 - 2.92)	0.000273745
MEF2D	2.01	(1.35 - 2.98)	0.000545365
PITPNM1	2.01	(1.35 - 3.01)	0.000661719
PSMB2	2.01	(1.36 - 2.96)	0.000440408
RNPEPL1	2.01	(1.39 - 2.91)	0.000203316
SEPN1	2.01	(1.36 - 2.95)	0.000405934
SF3A2	2.01	(1.38 - 2.94)	0.000307252
TMEM86B	2.01	(1.36 - 2.96)	0.000430921
UBE2C	2.01	(1.29 - 3.14)	0.0021435
ZBTB17	2.01	(1.34 - 3.02)	0.000783836
ZCCHC3	2.01	(1.39 - 2.93)	0.000248054
AGAP2	2	(1.39 - 2.87)	0.0001793
AP3D1	2	(1.38 - 2.9)	0.000274947
ATOX1	2	(1.37 - 2.94)	0.000353472
DLX6	2	(1.22 - 3.29)	0.00601443
EEF2K	2	(1.26 - 3.18)	0.00338924
GPI	2	(1.32 - 3.02)	0.00106543
GRK6	2	(1.39 - 2.88)	0.000211767
HDGFRP2	2	(1.31 - 3.05)	0.00129112
JMJD8	2	(1.35 - 2.95)	0.000498943
KHDC1	2	(1.36 - 2.95)	0.000428131
KXD1	2	(1.28 - 3.13)	0.00236467
MIIP	2	(1.36 - 2.94)	0.00040423
PTPN1	2	(1.34 - 2.97)	0.000625807
RETSAT	2	(1.37 - 2.94)	0.000379044
TXN2	2	(1.33 - 3)	0.000921919
TYSND1	2	(1.31 - 3.05)	0.00138553
UBE2R2	2	(1.36 - 2.93)	0.000390722
UBE2S	2	(1.27 - 3.16)	0.00287195
WDR34	2	(1.33 - 3.01)	0.000929098
EBP	1.99	(1.28 - 3.08)	0.00212056
FPGS	1.99	(1.29 - 3.07)	0.00182466
GLA	1.99	(1.28 - 3.11)	0.00230199
HAUS8	1.99	(1.31 - 3.04)	0.00140228
JOSD2	1.99	(1.29 - 3.06)	0.00183998
LINC00176	1.99	(1.37 - 2.89)	0.000282096
LOC541472	1.99	(1.33 - 2.99)	0.000887678
NACAD	1.99	(1.34 - 2.96)	0.000721185
NEDD8	1.99	(1.31 - 3.04)	0.00134298
NOC4L	1.99	(1.32 - 2.99)	0.000947057
NR2C2AP	1.99	(1.2 - 3.32)	0.00799007
PNKP	1.99	(1.24 - 3.2)	0.00444377
POLA2	1.99	(1.28 - 3.11)	0.00234545
RHOG	1.99	(1.36 - 2.92)	0.00040806
SART1	1.99	(1.27 - 3.13)	0.00270029
SLC35G1	1.99	(1.29 - 3.07)	0.00191829
STYK1	1.99	(1.31 - 3.01)	0.0011488
VPS16	1.99	(1.37 - 2.88)	0.000285588
WARS	1.99	(1.34 - 2.95)	0.000639322
WIZ	1.99	(1.34 - 2.97)	0.000660949
YDJC	1.99	(1.22 - 3.26)	0.00613574
BYSL	1.98	(1.25 - 3.15)	0.00388491
PIGQ	1.98	(1.37 - 2.86)	0.000277552
SAE1	1.98	(1.33 - 2.94)	0.000716069
SDF2L1	1.98	(1.34 - 2.93)	0.00057089
SH3BGRL3	1.98	(1.34 - 2.91)	0.000546069
SHKBP1	1.98	(1.32 - 2.96)	0.00092854
SLC35F6	1.98	(1.37 - 2.87)	0.00031308
SLC38A5	1.98	(1.29 - 3.06)	0.00193384
SLC45A4	1.98	(1.33 - 2.94)	0.000702583
TELO2	1.98	(1.33 - 2.96)	0.000783667
TRUB2	1.98	(1.3 - 3.02)	0.00152866
ALDH1A2	1.97	(1.31 - 2.98)	0.00124859
ATG2A	1.97	(1.34 - 2.89)	0.000501899
COX6B1	1.97	(1.28 - 3.03)	0.0021046
EIF4EBP1	1.97	(1.24 - 3.13)	0.00399209
HGS	1.97	(1.33 - 2.92)	0.000746617
LMAN2	1.97	(1.33 - 2.92)	0.000687063
PIGT	1.97	(1.35 - 2.89)	0.000486893
PPM1G	1.97	(1.35 - 2.86)	0.000382883
SNRPA	1.97	(1.25 - 3.1)	0.00355698
TUFM	1.97	(1.33 - 2.91)	0.000739105
ALDH1B1	1.96	(1.28 - 2.98)	0.00180335
CHAF1A	1.96	(1.22 - 3.14)	0.00526402
EXOSC4	1.96	(1.19 - 3.22)	0.00780653
GRINA	1.96	(1.36 - 2.82)	0.000314072
HEBP1	1.96	(1.33 - 2.9)	0.000732329
HOXD1	1.96	(1.31 - 2.94)	0.00109386
LIPE	1.96	(1.33 - 2.88)	0.000648275
SHISA5	1.96	(1.33 - 2.87)	0.00058191
SLC2A1	1.96	(1.35 - 2.84)	0.00037752
TBL3	1.96	(1.26 - 3.07)	0.00307692
TRIM47	1.96	(1.35 - 2.83)	0.000375587
AGPAT1	1.95	(1.35 - 2.81)	0.000398282
ANAPC2	1.95	(1.32 - 2.89)	0.00080779
ATF6	1.95	(1.28 - 2.97)	0.0017554
DLEU1	1.95	(1.24 - 3.06)	0.00372859
EDC4	1.95	(1.34 - 2.85)	0.00051594
FAH	1.95	(1.3 - 2.93)	0.00129889
FBXW5	1.95	(1.35 - 2.82)	0.000351581
H1FX	1.95	(1.27 - 3)	0.00216937
HEXA	1.95	(1.33 - 2.86)	0.000612884
HSF1	1.95	(1.34 - 2.82)	0.000419349
IER5L	1.95	(1.33 - 2.85)	0.000600704
KDELR1	1.95	(1.17 - 3.26)	0.0109466
LRRC41	1.95	(1.34 - 2.83)	0.000516313
MAPK8IP1	1.95	(1.34 - 2.83)	0.000489921
NT5DC3	1.95	(1.2 - 3.16)	0.00691768
PAK4	1.95	(1.34 - 2.83)	0.000441322
PKN1	1.95	(1.26 - 3.02)	0.00267612
PLOD3	1.95	(1.35 - 2.83)	0.000388921
PQLC1	1.95	(1.34 - 2.84)	0.000509071
SEMA4F	1.95	(1.34 - 2.83)	0.000482975
TFIP11	1.95	(1.34 - 2.83)	0.000474676
C1orf56	1.94	(1.33 - 2.81)	0.000501762
CTNS	1.94	(1.33 - 2.84)	0.00061537
FBXL14	1.94	(1.35 - 2.78)	0.000329383
FRMD8	1.94	(1.31 - 2.86)	0.000927193
GLIS2	1.94	(1.32 - 2.84)	0.000675627
KLHL26	1.94	(1.34 - 2.83)	0.000515092
MAPK8IP2	1.94	(1.34 - 2.81)	0.000446236
MRPL55	1.94	(1.29 - 2.92)	0.00150215
PPIB	1.94	(1.33 - 2.82)	0.000537773
PRKCSH	1.94	(1.3 - 2.91)	0.00126791
RANBP3	1.94	(1.32 - 2.85)	0.000683125
SBNO2	1.94	(1.31 - 2.87)	0.000864503
SLC16A2	1.94	(1.26 - 2.99)	0.00270256
U2AF2	1.94	(1.3 - 2.89)	0.00108767
VARS	1.94	(1.26 - 2.98)	0.00243304
ACP2	1.93	(1.29 - 2.88)	0.00138786
ASCC2	1.93	(1.34 - 2.77)	0.000411044
ATP6AP1	1.93	(1.31 - 2.84)	0.000897946
CMTM8	1.93	(1.25 - 2.98)	0.00284436
CYB5R3	1.93	(1.31 - 2.85)	0.000948046
MIF4GD	1.93	(1.31 - 2.86)	0.000945389
NFYC	1.93	(1.33 - 2.81)	0.000613539
PPP2R4	1.93	(1.3 - 2.85)	0.00100884
SCRN2	1.93	(1.31 - 2.85)	0.000881485
SF3A1	1.93	(1.32 - 2.82)	0.000630877
TBC1D10B	1.93	(1.33 - 2.8)	0.000563535
WDR4	1.93	(1.29 - 2.89)	0.00142417
ZNF282	1.93	(1.3 - 2.87)	0.00112092
ARFGAP1	1.92	(1.32 - 2.78)	0.000606791
ATAD3A	1.92	(1.32 - 2.77)	0.000553904
B9D2	1.92	(1.28 - 2.88)	0.00148792
BRD4	1.92	(1.31 - 2.81)	0.00083502
BRPF1	1.92	(1.29 - 2.85)	0.00134335
C1QTNF1	1.92	(1.31 - 2.82)	0.00082543
CAPN1	1.92	(1.28 - 2.88)	0.00170258
CHCHD10	1.92	(1.33 - 2.78)	0.000495198
IRF2BPL	1.92	(1.32 - 2.79)	0.000654581
LONP1	1.92	(1.3 - 2.83)	0.00102071
LSM4	1.92	(1.27 - 2.91)	0.0019651
MAP2K3	1.92	(1.34 - 2.75)	0.000420211
NSDHL	1.92	(1.27 - 2.9)	0.00196644
NUDC	1.92	(1.32 - 2.8)	0.000679828
PLXNB2	1.92	(1.33 - 2.75)	0.000449011
PRELID1	1.92	(1.23 - 3)	0.00383967
PTGES2	1.92	(1.31 - 2.8)	0.000728451
RHBDD2	1.92	(1.28 - 2.88)	0.00164936
SLC22A17	1.92	(1.31 - 2.81)	0.000799883
WIF1	1.92	(1.28 - 2.87)	0.00163322
ZNHIT1	1.92	(1.33 - 2.77)	0.000480666
ATRAID	1.91	(1.3 - 2.8)	0.000945107
AURKA	1.91	(1.22 - 2.99)	0.00437185
CAPZB	1.91	(1.29 - 2.84)	0.00120329
CCDC94	1.91	(1.25 - 2.94)	0.00304364
CLPB	1.91	(1.23 - 2.97)	0.00395252
COG8	1.91	(1.23 - 2.95)	0.00373034
FBXO46	1.91	(1.21 - 3)	0.00519043
HAGHL	1.91	(1.32 - 2.78)	0.000675109
HCFC1	1.91	(1.31 - 2.79)	0.000719652
MAPKAP1	1.91	(1.23 - 2.96)	0.003947
MORN5	1.91	(1.3 - 2.81)	0.00102007
NAT10	1.91	(1.16 - 3.14)	0.0107496
NUP93	1.91	(1.21 - 3.01)	0.00514035
PALD1	1.91	(1.28 - 2.86)	0.00150855
PEX14	1.91	(1.23 - 2.95)	0.00392042
RBM38	1.91	(1.25 - 2.93)	0.0027589
SMG5	1.91	(1.32 - 2.77)	0.000664335
SSR4	1.91	(1.2 - 3.06)	0.00648651
THOC6	1.91	(1.21 - 3.02)	0.00536627
VPS37B	1.91	(1.28 - 2.84)	0.00151676
ABHD14B	1.9	(1.3 - 2.78)	0.000880149
BET1L	1.9	(1.28 - 2.82)	0.00150614
CHCHD5	1.9	(1.26 - 2.88)	0.00236451
DDX49	1.9	(1.26 - 2.86)	0.00199707
DSC3	1.9	(1.25 - 2.88)	0.00254281
FAM155B	1.9	(1.24 - 2.92)	0.00324346
LZTS1	1.9	(1.32 - 2.73)	0.000490003
MKNK2	1.9	(1.31 - 2.75)	0.000709389
MRGBP	1.9	(1.23 - 2.92)	0.00365593
NUP188	1.9	(1.26 - 2.88)	0.00222311
OPLAH	1.9	(1.29 - 2.8)	0.00108095
PPP6R1	1.9	(1.31 - 2.76)	0.000694231
RAB11FIP5	1.9	(1.32 - 2.74)	0.000595238
SPPL3	1.9	(1.3 - 2.77)	0.000992306
SUV39H1	1.9	(1.18 - 3.06)	0.00785333
SYNGR2	1.9	(1.3 - 2.78)	0.000953846
WDR5	1.9	(1.24 - 2.9)	0.00296428
WDR54	1.9	(1.26 - 2.86)	0.00206732
AIMP2	1.89	(1.24 - 2.86)	0.00278754
ARL4D	1.89	(1.29 - 2.78)	0.0010765
ASPHD2	1.89	(1.31 - 2.72)	0.000642559
EIF4G1	1.89	(1.25 - 2.85)	0.00260426
FAM134A	1.89	(1.28 - 2.8)	0.00143883
GPAA1	1.89	(1.32 - 2.72)	0.000523079
LHPP	1.89	(1.29 - 2.78)	0.00111292
PEX10	1.89	(1.3 - 2.76)	0.000934814
PLD3	1.89	(1.27 - 2.81)	0.00177587
PNPLA6	1.89	(1.29 - 2.77)	0.00105209
PWWP2B	1.89	(1.27 - 2.8)	0.00170388
PXMP4	1.89	(1.2 - 2.96)	0.00591848
RFX1	1.89	(1.3 - 2.73)	0.000779031
RTKN	1.89	(1.25 - 2.85)	0.00256191
TTC9B	1.89	(1.26 - 2.83)	0.0020861
TYK2	1.89	(1.32 - 2.71)	0.000558095
BCAS1	1.88	(1.31 - 2.71)	0.000691214
CD276	1.88	(1.29 - 2.76)	0.0011261
FAM127B	1.88	(1.29 - 2.74)	0.00105822
FKRP	1.88	(1.29 - 2.74)	0.00104869
FZD5	1.88	(1.28 - 2.77)	0.00123543
HPS1	1.88	(1.3 - 2.73)	0.000827295
IGFBP2	1.88	(1.27 - 2.77)	0.00157476
IPO13	1.88	(1.28 - 2.76)	0.00132858
LMTK2	1.88	(1.28 - 2.76)	0.00120656
LSM7	1.88	(1.22 - 2.91)	0.00442704
MCFD2	1.88	(1.28 - 2.76)	0.00125752
MIEN1	1.88	(1.27 - 2.79)	0.0016359
N4BP3	1.88	(1.28 - 2.76)	0.00133403
NUBP2	1.88	(1.28 - 2.77)	0.00139089
PHLDA3	1.88	(1.28 - 2.78)	0.00137884
SMTN	1.88	(1.3 - 2.72)	0.000763573
UPF1	1.88	(1.3 - 2.73)	0.000844807
ZNF358	1.88	(1.26 - 2.79)	0.00181451
C6orf47	1.87	(1.28 - 2.75)	0.00128541
DAG1	1.87	(1.29 - 2.7)	0.000849799
FKBP2	1.87	(1.22 - 2.87)	0.00422108
GPATCH3	1.87	(1.21 - 2.87)	0.00440141
IGHMBP2	1.87	(1.26 - 2.76)	0.00173071
IL1RL1	1.87	(1.28 - 2.74)	0.00128772
KIAA2013	1.87	(1.25 - 2.79)	0.00218001
PAQR4	1.87	(1.28 - 2.73)	0.0011969
PRKAB1	1.87	(1.29 - 2.71)	0.000884649
SYS1	1.87	(1.2 - 2.92)	0.00588803
TIMM44	1.87	(1.23 - 2.84)	0.00324164
TWF2	1.87	(1.27 - 2.76)	0.00166126
ZNF703	1.87	(1.27 - 2.74)	0.00145374
ARID3B	1.86	(1.27 - 2.73)	0.00151443
CDHR2	1.86	(1.27 - 2.72)	0.00148474
CRY2	1.86	(1.21 - 2.88)	0.00500451
E2F1	1.86	(1.19 - 2.89)	0.00610183
EMILIN2	1.86	(1.25 - 2.77)	0.00222905
ENDOG	1.86	(1.23 - 2.81)	0.00306376
FEM1A	1.86	(1.21 - 2.87)	0.00495626
HOXA13	1.86	(1.29 - 2.69)	0.000899287
ITPRIPL1	1.86	(1.15 - 3)	0.0114018
MED15	1.86	(1.3 - 2.68)	0.000773612
RABEP2	1.86	(1.28 - 2.7)	0.00107847
RCAN3	1.86	(1.12 - 3.09)	0.0171059
RHOT2	1.86	(1.29 - 2.7)	0.000978177
RPAP1	1.86	(1.25 - 2.76)	0.00212805
RTN4R	1.86	(1.24 - 2.78)	0.00267506
SLC2A4RG	1.86	(1.29 - 2.69)	0.000960392
SLC35C1	1.86	(1.26 - 2.74)	0.00177208
SRBD1	1.86	(1.2 - 2.86)	0.00518909
TMEM53	1.86	(1.28 - 2.7)	0.00116365
VMA21	1.86	(1.19 - 2.89)	0.00631226
ZNF653	1.86	(1.28 - 2.7)	0.00118333
APOB	1.85	(1.26 - 2.71)	0.00162651
CDH26	1.85	(1.28 - 2.68)	0.00116222
GMEB2	1.85	(1.22 - 2.82)	0.00399189
GOT2	1.85	(1.22 - 2.8)	0.00394034
HMGA1	1.85	(1.19 - 2.87)	0.00586168
LRR1	1.85	(1.18 - 2.9)	0.0071441
MICALL1	1.85	(1.29 - 2.65)	0.000815215
NAGLU	1.85	(1.28 - 2.68)	0.00114058
TRPC4AP	1.85	(1.28 - 2.68)	0.00106283
USP19	1.85	(1.28 - 2.69)	0.0011437
YIF1B	1.85	(1.23 - 2.78)	0.0030029
ABCB9	1.84	(1.27 - 2.68)	0.00134106
AP2A2	1.84	(1.22 - 2.78)	0.00375791
AUNIP	1.84	(1.21 - 2.8)	0.00444706
AUP1	1.84	(1.27 - 2.67)	0.00124563
CDT1	1.84	(1.17 - 2.89)	0.00851253
CHST13	1.84	(1.24 - 2.72)	0.00243883
CSK	1.84	(1.27 - 2.68)	0.00130922
FOXC1	1.84	(1.23 - 2.75)	0.00294231
GAST	1.84	(1.24 - 2.74)	0.00257804
GTF3C1	1.84	(1.24 - 2.73)	0.0023058
HDDC3	1.84	(1.18 - 2.87)	0.00743828
HOXC4	1.84	(1.29 - 2.64)	0.000840677
METTL13	1.84	(1.18 - 2.89)	0.00758608
MSRB1	1.84	(1.23 - 2.75)	0.00310923
PEX5L	1.84	(1.26 - 2.69)	0.00168782
PGAP3	1.84	(1.22 - 2.76)	0.00367072
TMEM219	1.84	(1.25 - 2.71)	0.00188427
TYMP	1.84	(1.26 - 2.67)	0.00141776
WASF2	1.84	(1.26 - 2.68)	0.00148671
ACOX3	1.83	(1.25 - 2.68)	0.00192614
CDC25B	1.83	(1.26 - 2.67)	0.00155197
CDH4	1.83	(1.24 - 2.69)	0.0021548
CRYGC	1.83	(1.25 - 2.68)	0.00202606
FAM53B	1.83	(1.28 - 2.64)	0.00103643
FAM9A	1.83	(1.24 - 2.71)	0.00238994
GAL3ST3	1.83	(1.2 - 2.79)	0.00505813
GPC1	1.83	(1.27 - 2.64)	0.00121681
HSD17B10	1.83	(1.22 - 2.76)	0.0038188
NIP7	1.83	(1.18 - 2.84)	0.00690834
OTUB1	1.83	(1.19 - 2.82)	0.00570974
PFN1	1.83	(1.26 - 2.68)	0.00173539
PSPN	1.83	(1.24 - 2.72)	0.00257985
PTPRN	1.83	(1.25 - 2.67)	0.00172085
RAB3A	1.83	(1.27 - 2.63)	0.00117207
STARD3	1.83	(1.25 - 2.67)	0.00188474
STRA6	1.83	(1.23 - 2.73)	0.00291225
TICAM1	1.83	(1.22 - 2.74)	0.00353811
TMEM63B	1.83	(1.26 - 2.66)	0.00138655
TSEN34	1.83	(1.21 - 2.75)	0.00404028
UBQLN4	1.83	(1.22 - 2.73)	0.00332792
VNN3	1.83	(1.27 - 2.65)	0.00117762
ARC	1.82	(1.2 - 2.77)	0.00498677
C7orf43	1.82	(1.26 - 2.63)	0.00142638
CCDC124	1.82	(1.19 - 2.78)	0.00575624
CFL1	1.82	(1.24 - 2.68)	0.00232335
COMMD5	1.82	(1.21 - 2.74)	0.00376563
DENND1A	1.82	(1.24 - 2.68)	0.00246117
DNM2	1.82	(1.26 - 2.62)	0.00128267
FAM127A	1.82	(1.25 - 2.65)	0.00173986
FIZ1	1.82	(1.22 - 2.72)	0.00336976
HES6	1.82	(1.21 - 2.73)	0.0037396
MGAT1	1.82	(1.26 - 2.62)	0.00130225
MOCS1	1.82	(1.25 - 2.65)	0.00168418
PEA15	1.82	(1.22 - 2.72)	0.00341235
PORCN	1.82	(1.26 - 2.64)	0.00146403
SEL1L	1.82	(1.19 - 2.78)	0.00573575
SKIV2L	1.82	(1.24 - 2.68)	0.00226951
TEF	1.82	(1.26 - 2.63)	0.00136579
TP53TG1	1.82	(1.26 - 2.64)	0.00157293
UQCR11	1.82	(1.24 - 2.69)	0.00236986
ZNF496	1.82	(1.25 - 2.66)	0.00191048
ZNF672	1.82	(1.26 - 2.62)	0.00133745
BRF1	1.81	(1.25 - 2.62)	0.00152852
CCDC134	1.81	(1.22 - 2.69)	0.00321937
CDC20	1.81	(1.24 - 2.65)	0.00215801
HSPB6	1.81	(1.25 - 2.6)	0.00156192
IMPA2	1.81	(1.22 - 2.7)	0.00353833
KLHDC8B	1.81	(1.18 - 2.78)	0.00673879
KRT10	1.81	(1.23 - 2.66)	0.00275058
LIPH	1.81	(1.2 - 2.73)	0.00475583
MYRF	1.81	(1.25 - 2.6)	0.00152249
NT5C	1.81	(1.24 - 2.64)	0.00199902
POLR2E	1.81	(1.22 - 2.67)	0.00302623
PRRC2A	1.81	(1.26 - 2.6)	0.00145739
PTGFRN	1.81	(1.23 - 2.67)	0.00255689
PYROXD2	1.81	(1.26 - 2.61)	0.0013703
RFXANK	1.81	(1.17 - 2.8)	0.00731157
SLC30A8	1.81	(1.24 - 2.64)	0.0021506
SLC39A1	1.81	(1.17 - 2.79)	0.00722867
STK11	1.81	(1.24 - 2.65)	0.00225629
TAGLN2	1.81	(1.26 - 2.6)	0.00138339
TMED3	1.81	(1.17 - 2.82)	0.00815534
ARFRP1	1.8	(1.24 - 2.61)	0.00195409
ARHGEF5	1.8	(1.23 - 2.63)	0.00261068
ATXN7L3	1.8	(1.21 - 2.66)	0.00346205
CCNB2	1.8	(1.15 - 2.82)	0.00955647
CDCA4	1.8	(1.11 - 2.9)	0.0168229
CLUH	1.8	(1.21 - 2.68)	0.00349212
DAZAP1	1.8	(1.17 - 2.76)	0.00731636
DCAF15	1.8	(1.24 - 2.63)	0.00223834
E4F1	1.8	(1.25 - 2.6)	0.00174463
EPOR	1.8	(1.21 - 2.67)	0.0035531
GMDS	1.8	(1.18 - 2.76)	0.00677672
PRADC1	1.8	(1.24 - 2.6)	0.00190406
RAB7A	1.8	(1.25 - 2.6)	0.00162761
RAVER1	1.8	(1.23 - 2.64)	0.00264216
RNF10	1.8	(1.23 - 2.65)	0.00271351
RNF166	1.8	(1.23 - 2.62)	0.00232129
RNF187	1.8	(1.25 - 2.61)	0.00172789
RNF25	1.8	(1.25 - 2.6)	0.00158415
RRP7A	1.8	(1.25 - 2.57)	0.00137323
RRP8	1.8	(1.21 - 2.68)	0.0035555
SEMA6B	1.8	(1.24 - 2.6)	0.00192612
SLC25A10	1.8	(1.21 - 2.69)	0.00409153
SSH1	1.8	(1.26 - 2.59)	0.0013045
TFPT	1.8	(1.18 - 2.73)	0.00585178
TRAF2	1.8	(1.24 - 2.62)	0.00186107
TRIM8	1.8	(1.25 - 2.6)	0.00163966
TSPAN4	1.8	(1.23 - 2.64)	0.00229871
ZNF513	1.8	(1.25 - 2.6)	0.00177865
ARMC7	1.79	(1.18 - 2.73)	0.00672223
CALU	1.79	(1.2 - 2.68)	0.00458265
CCR10	1.79	(1.23 - 2.6)	0.00244321
CHST15	1.79	(1.24 - 2.58)	0.00195141
DNAJC4	1.79	(1.2 - 2.67)	0.00403963
GPRC5B	1.79	(1.24 - 2.58)	0.00197935
HCCS	1.79	(1.17 - 2.73)	0.0076181
KCTD17	1.79	(1.22 - 2.63)	0.00272091
KEAP1	1.79	(1.15 - 2.79)	0.0094318
MAN2B1	1.79	(1.24 - 2.57)	0.00175217
PEF1	1.79	(1.17 - 2.75)	0.00767143
PIM3	1.79	(1.21 - 2.63)	0.00337297
PKMYT1	1.79	(1.2 - 2.68)	0.00449177
PLBD2	1.79	(1.24 - 2.58)	0.00184751
POC1A	1.79	(1.17 - 2.75)	0.00716532
RAB1B	1.79	(1.2 - 2.66)	0.00399132
SCAP	1.79	(1.2 - 2.66)	0.00398842
SLC18A3	1.79	(1.19 - 2.69)	0.00523855
SMG6	1.79	(1.23 - 2.61)	0.00236996
SUPT5H	1.79	(1.24 - 2.6)	0.00198271
TMEM9	1.79	(1.25 - 2.58)	0.00162042
TRAPPC1	1.79	(1.25 - 2.57)	0.00164679
TRAPPC12	1.79	(1.23 - 2.6)	0.0021561
UBE2E2	1.79	(1.25 - 2.56)	0.00151918
YKT6	1.79	(1.21 - 2.65)	0.0036077
ABCF2	1.78	(1.17 - 2.7)	0.00729278
ACADVL	1.78	(1.17 - 2.72)	0.00720925
BATF2	1.78	(1.18 - 2.68)	0.00574377
BTC	1.78	(1.21 - 2.61)	0.00329173
CCDC28B	1.78	(1.2 - 2.64)	0.00407116
CYB561D2	1.78	(1.16 - 2.73)	0.00824613
DCTN1	1.78	(1.2 - 2.63)	0.00382556
FADS2	1.78	(1.22 - 2.61)	0.00287159
FKBP8	1.78	(1.21 - 2.61)	0.00320942
GTF2F1	1.78	(1.18 - 2.68)	0.00602183
IL1RN	1.78	(1.21 - 2.63)	0.00377055
KDELR2	1.78	(1.2 - 2.65)	0.00452363
KIAA1324	1.78	(1.2 - 2.65)	0.00417682
KPNB1	1.78	(1.21 - 2.64)	0.00373857
L1CAM	1.78	(1.22 - 2.59)	0.00277061
MFSD3	1.78	(1.16 - 2.75)	0.00855806
MPG	1.78	(1.18 - 2.68)	0.00582564
MYADM	1.78	(1.24 - 2.56)	0.00190699
PTPN18	1.78	(1.24 - 2.57)	0.0019941
SLC10A3	1.78	(1.19 - 2.64)	0.00450933
THAP11	1.78	(1.17 - 2.7)	0.00682472
TMED1	1.78	(1.18 - 2.68)	0.006065
UBXN1	1.78	(1.18 - 2.68)	0.00561018
WDTC1	1.78	(1.22 - 2.6)	0.00300009
AP5S1	1.77	(1.19 - 2.65)	0.00513513
ARHGDIA	1.77	(1.18 - 2.66)	0.00565506
BCL7B	1.77	(1.2 - 2.59)	0.00369535
C19orf25	1.77	(1.2 - 2.61)	0.00383525
CDKAL1	1.77	(1.16 - 2.68)	0.00768972
DUS3L	1.77	(1.13 - 2.78)	0.0129901
ESYT1	1.77	(1.2 - 2.6)	0.00412047
FCHO1	1.77	(1.21 - 2.59)	0.00319431
HDGF	1.77	(1.17 - 2.68)	0.0068386
ITPK1	1.77	(1.22 - 2.56)	0.002528
KLHL36	1.77	(1.15 - 2.72)	0.00998368
KRT86	1.77	(1.19 - 2.64)	0.00467745
LIF	1.77	(1.22 - 2.56)	0.00251053
NCK2	1.77	(1.23 - 2.56)	0.00233923
POFUT2	1.77	(1.23 - 2.57)	0.00236664
POLR2D	1.77	(1.18 - 2.66)	0.0061595
PRLH	1.77	(1.2 - 2.61)	0.00410635
PSMB4	1.77	(1.21 - 2.6)	0.00348289
RPS6KA4	1.77	(1.2 - 2.61)	0.00420166
SCYL1	1.77	(1.19 - 2.63)	0.00445367
SLC12A9	1.77	(1.24 - 2.54)	0.0017565
TCN1	1.77	(1.23 - 2.56)	0.00209508
TIMP1	1.77	(1.22 - 2.57)	0.00275384
TRNP1	1.77	(1.21 - 2.6)	0.00329918
TST	1.77	(1.17 - 2.68)	0.00672504
TUBG1	1.77	(1.22 - 2.58)	0.00286247
ZFYVE1	1.77	(1.22 - 2.58)	0.00270605
ADRB1	1.76	(1.17 - 2.67)	0.00727549
CCDC64B	1.76	(1.2 - 2.6)	0.00420678
CDC42EP4	1.76	(1.12 - 2.78)	0.014459
CRELD2	1.76	(1.22 - 2.54)	0.00240041
CYP8B1	1.76	(1.2 - 2.57)	0.00352544
DAP	1.76	(1.22 - 2.55)	0.00242628
DBI	1.76	(1.21 - 2.54)	0.00285414
DDX19A	1.76	(1.19 - 2.59)	0.00448904
DLG4	1.76	(1.21 - 2.57)	0.00314796
HIST1H1C	1.76	(1.09 - 2.83)	0.0212328
INTS1	1.76	(1.22 - 2.52)	0.00222154
LAGE3	1.76	(1.12 - 2.77)	0.0141285
NAT14	1.76	(1.19 - 2.59)	0.00449341
NDST1	1.76	(1.21 - 2.57)	0.00319837
PIAS4	1.76	(1.22 - 2.54)	0.00228907
RNF208	1.76	(1.18 - 2.61)	0.00522764
SIPA1	1.76	(1.22 - 2.54)	0.00269574
TP53I13	1.76	(1.23 - 2.53)	0.00220367
WRAP53	1.76	(1.18 - 2.62)	0.00526882
ATIC	1.75	(1.11 - 2.75)	0.0154686
B4GALT1	1.75	(1.21 - 2.52)	0.00279446
C9orf16	1.75	(1.2 - 2.55)	0.0034057
CARTPT	1.75	(1.21 - 2.52)	0.00280955
CD2BP2	1.75	(1.17 - 2.63)	0.00667159
CHD4	1.75	(1.21 - 2.55)	0.00309383
CNOT3	1.75	(1.15 - 2.67)	0.00940933
DHX38	1.75	(1.2 - 2.55)	0.00333911
EMILIN1	1.75	(1.17 - 2.59)	0.00587456
FBRS	1.75	(1.19 - 2.57)	0.00458412
GDF11	1.75	(1.2 - 2.55)	0.00372802
GNA11	1.75	(1.22 - 2.5)	0.0023737
GSTZ1	1.75	(1.12 - 2.74)	0.0132391
HES7	1.75	(1.21 - 2.54)	0.00290022
HTN1	1.75	(1.15 - 2.67)	0.00905544
HYAL2	1.75	(1.18 - 2.61)	0.00550765
KIF22	1.75	(1.17 - 2.61)	0.00642378
MVD	1.75	(1.22 - 2.51)	0.00214566
NCAPD2	1.75	(1.16 - 2.65)	0.00764803
PSMB5	1.75	(1.17 - 2.61)	0.00669801
REC8	1.75	(1.2 - 2.54)	0.00332919
SIRT6	1.75	(1.18 - 2.6)	0.00542835
SMG7	1.75	(1.22 - 2.51)	0.00253681
SPECC1	1.75	(1.2 - 2.54)	0.00354143
ST3GAL5	1.75	(1.22 - 2.52)	0.00252752
STRN4	1.75	(1.21 - 2.52)	0.00288254
SULT1B1	1.75	(1.21 - 2.54)	0.00322502
ABCA3	1.74	(1.2 - 2.52)	0.00321784
ADRA1A	1.74	(1.2 - 2.52)	0.00374069
AXIN1	1.74	(1.2 - 2.52)	0.00339834
C14orf1	1.74	(1.15 - 2.63)	0.00882442
C14orf39	1.74	(1.11 - 2.71)	0.0156446
C19orf43	1.74	(1.15 - 2.62)	0.00826996
CACNA1C	1.74	(1.2 - 2.51)	0.00328311
CALR	1.74	(1.19 - 2.55)	0.00448374
CBX4	1.74	(1.18 - 2.56)	0.004925
CD3EAP	1.74	(1.07 - 2.82)	0.0246556
CD99L2	1.74	(1.2 - 2.51)	0.00359915
CDC34	1.74	(1.21 - 2.51)	0.00307347
COX5A	1.74	(1.15 - 2.64)	0.00889067
CTDNEP1	1.74	(1.21 - 2.49)	0.00253104
DFFA	1.74	(1.2 - 2.53)	0.00372041
DSCAM	1.74	(1.18 - 2.56)	0.00498626
FAM212A	1.74	(1.2 - 2.53)	0.00353022
FAM64A	1.74	(1.16 - 2.62)	0.00791033
FZD2	1.74	(1.18 - 2.57)	0.00558574
GATA2	1.74	(1.19 - 2.53)	0.0040316
GNB1L	1.74	(1.15 - 2.63)	0.00911484
KLK7	1.74	(1.19 - 2.53)	0.0041398
LIMK1	1.74	(1.17 - 2.59)	0.00638891
LRFN1	1.74	(1.2 - 2.51)	0.00318884
MBOAT7	1.74	(1.21 - 2.5)	0.00265368
MOB2	1.74	(1.17 - 2.59)	0.00622067
NDUFS3	1.74	(1.15 - 2.62)	0.00821698
PF4V1	1.74	(1.11 - 2.72)	0.0156635
PLA2G6	1.74	(1.21 - 2.5)	0.0025917
PLP2	1.74	(1.21 - 2.5)	0.00269449
POLR3K	1.74	(1.13 - 2.67)	0.0116484
POP7	1.74	(1.15 - 2.61)	0.00822929
PPP1R15A	1.74	(1.21 - 2.5)	0.00276166
PSKH1	1.74	(1.2 - 2.52)	0.00362619
RALY	1.74	(1.19 - 2.54)	0.00417527
RBM28	1.74	(1.16 - 2.62)	0.00714292
RHOBTB2	1.74	(1.2 - 2.51)	0.00316232
RNH1	1.74	(1.2 - 2.52)	0.00320603
SCAMP4	1.74	(1.2 - 2.52)	0.00360776
SF3B4	1.74	(1.18 - 2.57)	0.00530677
SLC11A1	1.74	(1.16 - 2.6)	0.00737022
SLC25A25	1.74	(1.21 - 2.49)	0.00274737
SLC35F2	1.74	(1.14 - 2.64)	0.00977573
SUPT6H	1.74	(1.21 - 2.5)	0.00300427
TMEM134	1.74	(1.16 - 2.61)	0.0070858
UBA1	1.74	(1.2 - 2.52)	0.00321394
UBE2I	1.74	(1.16 - 2.62)	0.00792251
AHNAK2	1.73	(1.2 - 2.49)	0.00317455
ANK1	1.73	(1.18 - 2.54)	0.00531538
ATP6V0D1	1.73	(1.15 - 2.61)	0.00844937
C2orf88	1.73	(1.19 - 2.5)	0.00403966
C9orf69	1.73	(1.19 - 2.52)	0.00427931
CBX6	1.73	(1.2 - 2.49)	0.00311112
CCDC71L	1.73	(1.16 - 2.57)	0.00701288
CDC14B	1.73	(1.2 - 2.49)	0.00333414
CIZ1	1.73	(1.19 - 2.53)	0.00435037
CKB	1.73	(1.19 - 2.53)	0.00428476
CLPP	1.73	(1.1 - 2.71)	0.0167172
CLPTM1L	1.73	(1.19 - 2.49)	0.00364115
CPT1A	1.73	(1.19 - 2.51)	0.00388649
DDIT4	1.73	(1.2 - 2.49)	0.00312924
DDRGK1	1.73	(1.2 - 2.49)	0.00356444
ETHE1	1.73	(1.18 - 2.52)	0.0048402
FAM132B	1.73	(1.07 - 2.79)	0.0257025
FAM57A	1.73	(1.21 - 2.48)	0.002709
FEV	1.73	(1.12 - 2.65)	0.012742
IQGAP3	1.73	(1.14 - 2.62)	0.00971364
METRN	1.73	(1.19 - 2.52)	0.00386966
MGAT5B	1.73	(1.18 - 2.53)	0.00512196
MPV17	1.73	(1.2 - 2.5)	0.00349113
MVK	1.73	(1.18 - 2.54)	0.0053987
MYPOP	1.73	(1.18 - 2.54)	0.00537529
NES	1.73	(1.21 - 2.47)	0.00278285
PPP1R16A	1.73	(1.2 - 2.5)	0.00365155
RABGGTA	1.73	(1.12 - 2.69)	0.0144766
RIMS4	1.73	(1.19 - 2.5)	0.00381141
SAAL1	1.73	(1.03 - 2.91)	0.0371509
TECPR1	1.73	(1.15 - 2.58)	0.00796059
TSKU	1.73	(1.14 - 2.63)	0.0100932
UBE2O	1.73	(1.19 - 2.52)	0.00396064
WFDC2	1.73	(1.14 - 2.62)	0.00994564
ZNF219	1.73	(1.11 - 2.68)	0.0147687
ZNF764	1.73	(1.12 - 2.65)	0.0124963
ADIPOR1	1.72	(1.19 - 2.5)	0.00400035
B4GALT2	1.72	(1.2 - 2.48)	0.00348417
C21orf33	1.72	(1.18 - 2.52)	0.00519406
CCDC61	1.72	(1.2 - 2.48)	0.00323628
DNPH1	1.72	(1.16 - 2.57)	0.00730279
DPF1	1.72	(1.17 - 2.54)	0.0059704
DVL3	1.72	(1.18 - 2.52)	0.00494394
EEF1D	1.72	(1.18 - 2.51)	0.00475898
EHD3	1.72	(1.2 - 2.47)	0.00338922
FAM20C	1.72	(1.17 - 2.53)	0.00557489
FXYD5	1.72	(1.17 - 2.52)	0.00554069
GABRR2	1.72	(1.19 - 2.48)	0.00412912
GPS1	1.72	(1.16 - 2.54)	0.0065674
HPDL	1.72	(1.11 - 2.67)	0.0155645
IDUA	1.72	(1.19 - 2.48)	0.00388036
KCNAB2	1.72	(1.17 - 2.53)	0.00586661
LAMTOR4	1.72	(1.19 - 2.49)	0.00392043
LCMT1	1.72	(1.18 - 2.52)	0.0052732
NDUFB11	1.72	(1.11 - 2.67)	0.0148859
NOD1	1.72	(1.19 - 2.48)	0.0038769
PA2G4	1.72	(1.14 - 2.59)	0.00933337
PGS1	1.72	(1.17 - 2.52)	0.00592986
PHYHD1	1.72	(1.2 - 2.45)	0.003067
PLB1	1.72	(1.2 - 2.47)	0.0032643
PLK3	1.72	(1.2 - 2.47)	0.00316347
PPP1R3D	1.72	(1.19 - 2.48)	0.00395027
SETD1A	1.72	(1.18 - 2.51)	0.00478983
SF3B5	1.72	(1.18 - 2.52)	0.00520449
SIPA1L1	1.72	(1.18 - 2.5)	0.00472542
SLC25A42	1.72	(1.18 - 2.51)	0.00514032
SLC35D3	1.72	(1.18 - 2.52)	0.00499332
TMEM115	1.72	(1.18 - 2.51)	0.00504261
TOMM40	1.72	(1.1 - 2.68)	0.016521
ZBTB48	1.72	(1.14 - 2.6)	0.0094644
ACOT7	1.71	(1.17 - 2.5)	0.00585374
AGBL5	1.71	(1.13 - 2.59)	0.0116532
AGFG2	1.71	(1.15 - 2.54)	0.00853285
APRT	1.71	(1.12 - 2.63)	0.0130257
ARHGEF2	1.71	(1.15 - 2.54)	0.00836542
ATP13A1	1.71	(1.14 - 2.55)	0.00918361
AURKB	1.71	(1.12 - 2.61)	0.0124769
B4GALNT1	1.71	(1.2 - 2.45)	0.00336677
COASY	1.71	(1.16 - 2.52)	0.00677202
CST3	1.71	(1.18 - 2.48)	0.00425281
DBP	1.71	(1.16 - 2.52)	0.00626388
DHCR7	1.71	(1.14 - 2.56)	0.00988233
EHD1	1.71	(1.17 - 2.49)	0.00544048
ELOF1	1.71	(1.12 - 2.61)	0.0127072
GLTP	1.71	(1.17 - 2.49)	0.00551437
GLTSCR1	1.71	(1.18 - 2.47)	0.00443996
IMPDH1	1.71	(1.18 - 2.48)	0.00497946
LRRN2	1.71	(1.15 - 2.55)	0.00759444
LY6E	1.71	(1.12 - 2.63)	0.0133978
MLLT1	1.71	(1.19 - 2.45)	0.00402455
MMP2	1.71	(1.14 - 2.56)	0.00943108
MOCS3	1.71	(1.15 - 2.56)	0.00835938
NCAN	1.71	(1.09 - 2.69)	0.0202503
OR7E156P	1.71	(1.18 - 2.46)	0.00440026
PALM3	1.71	(1.07 - 2.75)	0.0251804
PIP4K2C	1.71	(1.13 - 2.59)	0.011928
PSENEN	1.71	(1.16 - 2.54)	0.00698758
REEP2	1.71	(1.16 - 2.53)	0.00695121
SF3B2	1.71	(1.17 - 2.52)	0.00611008
SLC15A3	1.71	(1.17 - 2.49)	0.00520041
SLC24A3	1.71	(1.19 - 2.46)	0.00403912
SOX18	1.71	(1.17 - 2.49)	0.00543628
SV2A	1.71	(1.17 - 2.5)	0.00539317
TMEM55B	1.71	(1.14 - 2.59)	0.0101827
TRIB1	1.71	(1.19 - 2.45)	0.00368884
TRIM46	1.71	(1.16 - 2.51)	0.0062204
UBALD2	1.71	(1.17 - 2.49)	0.00514418
USP5	1.71	(1.19 - 2.46)	0.00343822
WFS1	1.71	(1.19 - 2.45)	0.00354516
B3GALT6	1.7	(1.17 - 2.48)	0.00526658
CDK4	1.7	(1.08 - 2.69)	0.0228411
CDKN1A	1.7	(1.17 - 2.47)	0.00518967
CRTC1	1.7	(1.17 - 2.49)	0.0057391
DDX28	1.7	(1.1 - 2.64)	0.018001
DGAT1	1.7	(1.18 - 2.43)	0.00399517
DPAGT1	1.7	(1.14 - 2.52)	0.0092417
DUSP15	1.7	(1.15 - 2.5)	0.00726402
EFNB1	1.7	(1.13 - 2.54)	0.0103523
EP400NL	1.7	(1.15 - 2.52)	0.00792786
ERMP1	1.7	(1.18 - 2.45)	0.00431917
EVI5L	1.7	(1.17 - 2.45)	0.00478492
FAM213B	1.7	(1.11 - 2.62)	0.0149205
FGD1	1.7	(1.15 - 2.49)	0.00713849
FOXM1	1.7	(1.13 - 2.57)	0.010847
GORASP2	1.7	(1.15 - 2.52)	0.0079121
GSTP1	1.7	(1.16 - 2.51)	0.00685544
HARBI1	1.7	(1.14 - 2.55)	0.0096375
HARS	1.7	(1.19 - 2.44)	0.00379568
HECTD3	1.7	(1.15 - 2.51)	0.00831973
HSPB1	1.7	(1.18 - 2.45)	0.00449434
HYOU1	1.7	(1.18 - 2.44)	0.00412874
PTPRU	1.7	(1.17 - 2.46)	0.00504571
PTRH1	1.7	(1.17 - 2.48)	0.00594493
RBCK1	1.7	(1.19 - 2.44)	0.00387839
RBM4	1.7	(1.14 - 2.55)	0.00952948
RBMS2	1.7	(1.17 - 2.46)	0.00516631
RCOR2	1.7	(1.17 - 2.47)	0.00499149
RRP12	1.7	(1.13 - 2.57)	0.0108637
RUVBL1	1.7	(1.07 - 2.71)	0.0251906
SLC1A4	1.7	(1.19 - 2.44)	0.00392744
SLC25A3P1	1.7	(1.17 - 2.46)	0.0053896
SLC35C2	1.7	(1.18 - 2.47)	0.00490627
SLC45A1	1.7	(1.13 - 2.55)	0.0100762
SPAG4	1.7	(1.15 - 2.52)	0.00814378
SUOX	1.7	(1.15 - 2.51)	0.00831459
TFE3	1.7	(1.16 - 2.49)	0.00613037
TRIM41	1.7	(1.18 - 2.45)	0.00425294
TRIP13	1.7	(1.06 - 2.73)	0.0290612
WDR18	1.7	(1.14 - 2.55)	0.00979756
ZNF114	1.7	(1.15 - 2.51)	0.00812208
AQP3	1.69	(1.17 - 2.43)	0.00498146
ATG13	1.69	(1.14 - 2.5)	0.00880249
CCDC97	1.69	(1.16 - 2.46)	0.00579907
CDKN1C	1.69	(1.14 - 2.5)	0.0092201
CEP55	1.69	(1.11 - 2.58)	0.0139462
CHTF8	1.69	(1.16 - 2.47)	0.00672059
CTDSP1	1.69	(1.18 - 2.43)	0.00412602
CYP11B2	1.69	(1.18 - 2.44)	0.00453899
DBN1	1.69	(1.18 - 2.42)	0.00439978
DGCR2	1.69	(1.12 - 2.57)	0.0134127
EIF5A	1.69	(1.17 - 2.45)	0.00534957
FAM109A	1.69	(1.17 - 2.45)	0.00515988
FTH1	1.69	(1.11 - 2.58)	0.0137703
GLIS1	1.69	(1.12 - 2.53)	0.011588
GOLGA3	1.69	(1.16 - 2.47)	0.00600727
HELZ2	1.69	(1.15 - 2.47)	0.00749506
HMGB3P1	1.69	(1.03 - 2.75)	0.0360421
HNRNPAB	1.69	(1.14 - 2.5)	0.00952859
HS1BP3	1.69	(1.17 - 2.45)	0.0055819
KDM5C	1.69	(1.13 - 2.52)	0.0109158
KIFC3	1.69	(1.17 - 2.46)	0.00573683
KPTN	1.69	(1.16 - 2.46)	0.00651127
MID1IP1	1.69	(1.14 - 2.51)	0.0097005
NCDN	1.69	(1.1 - 2.58)	0.0164296
PKM	1.69	(1.14 - 2.52)	0.0097915
PMPCA	1.69	(1.14 - 2.49)	0.00882216
PTCRA	1.69	(1.16 - 2.45)	0.00567732
RPS6KA1	1.69	(1.15 - 2.49)	0.00805157
SHC1	1.69	(1.17 - 2.44)	0.00529533
SIGIRR	1.69	(1.13 - 2.53)	0.0104228
SLC25A22	1.69	(1.12 - 2.53)	0.0117553
SNRNP40	1.69	(1.18 - 2.44)	0.00467403
SRC	1.69	(1.16 - 2.45)	0.00602449
TAF6	1.69	(1.17 - 2.46)	0.00568456
THAP8	1.69	(1.18 - 2.42)	0.00460639
THRB	1.69	(1.16 - 2.44)	0.00586942
TMEM185B	1.69	(1.15 - 2.48)	0.00795128
TSPAN15	1.69	(1.16 - 2.45)	0.00575504
ARAF	1.68	(1.14 - 2.47)	0.00846491
ATG4D	1.68	(1.16 - 2.42)	0.00553624
BAG3	1.68	(1.16 - 2.43)	0.00607768
C12orf42	1.68	(1.12 - 2.53)	0.0118844
C14orf105	1.68	(1.14 - 2.48)	0.00894666
C9orf114	1.68	(1.15 - 2.47)	0.00752901
CTPS1	1.68	(1.17 - 2.4)	0.00461187
DCTPP1	1.68	(1.05 - 2.68)	0.0308617
DLK2	1.68	(1.15 - 2.45)	0.00722215
FEN1	1.68	(1.06 - 2.68)	0.0282892
HIST1H2BE	1.68	(1.08 - 2.59)	0.0201826
IRAK1	1.68	(1.09 - 2.6)	0.0194806
KCNK12	1.68	(1.17 - 2.42)	0.00457852
KHK	1.68	(1.17 - 2.41)	0.00527532
LDB1	1.68	(1.17 - 2.41)	0.00523182
LHFPL1	1.68	(1.13 - 2.52)	0.0111014
LOC148413	1.68	(1.09 - 2.59)	0.0184402
MAPKAPK3	1.68	(1.13 - 2.5)	0.0100771
MRPL17	1.68	(1.08 - 2.62)	0.0214275
MRPS11	1.68	(1.14 - 2.48)	0.00890003
PIM2	1.68	(1.12 - 2.54)	0.0124773
PLTP	1.68	(1.15 - 2.46)	0.00795096
PPP2R1A	1.68	(1.16 - 2.43)	0.0059365
PPTC7	1.68	(1.14 - 2.47)	0.00901415
PRR12	1.68	(1.16 - 2.42)	0.00564963
PRSS22	1.68	(1.16 - 2.43)	0.00635856
PTTG1	1.68	(1.1 - 2.57)	0.0161405
RAP1GAP	1.68	(1.14 - 2.48)	0.00899988
RASSF7	1.68	(1.13 - 2.5)	0.00992246
RNASEH2A	1.68	(1.05 - 2.68)	0.0301676
RNF126	1.68	(1.11 - 2.54)	0.013252
SLC2A6	1.68	(1.12 - 2.52)	0.0119112
SRD5A3	1.68	(1.06 - 2.64)	0.0265186
TMEM158	1.68	(1.16 - 2.43)	0.00633285
TUT1	1.68	(1.09 - 2.57)	0.017543
UCKL1	1.68	(1.12 - 2.53)	0.0130748
ANKRD37	1.67	(1.07 - 2.61)	0.0227586
AOC2	1.67	(1.15 - 2.43)	0.00660786
ARF1	1.67	(1.16 - 2.4)	0.00535764
BCAM	1.67	(1.15 - 2.41)	0.0069151
C17orf53	1.67	(1.11 - 2.53)	0.0149389
CALML3	1.67	(1.15 - 2.43)	0.00711443
CLN6	1.67	(1.09 - 2.55)	0.0183218
CYTH3	1.67	(1.16 - 2.4)	0.00573866
DAGLB	1.67	(1.15 - 2.42)	0.00713894
DLGAP5	1.67	(1.06 - 2.63)	0.0278349
DNTTIP1	1.67	(1.13 - 2.47)	0.0107048
ESRRA	1.67	(1.08 - 2.56)	0.0198555
FAM222A	1.67	(1.14 - 2.43)	0.00804153
GRN	1.67	(1.1 - 2.52)	0.0155082
IRX3	1.67	(1.15 - 2.41)	0.00673702
ITPKC	1.67	(1.16 - 2.39)	0.0053931
KLF16	1.67	(1.15 - 2.41)	0.006699
LRRC73	1.67	(1.12 - 2.51)	0.0124491
LSR	1.67	(1.16 - 2.41)	0.0060153
MCM5	1.67	(1.11 - 2.52)	0.0145602
MRPL28	1.67	(1.12 - 2.5)	0.0116392
MRPS6	1.67	(1.14 - 2.44)	0.00830176
NDUFS7	1.67	(1.13 - 2.47)	0.00978303
NRGN	1.67	(1.09 - 2.55)	0.0181718
PIGS	1.67	(1.15 - 2.41)	0.0064384
PLA2G15	1.67	(1.16 - 2.4)	0.00586021
POLM	1.67	(1.16 - 2.42)	0.0063221
PPP2R5D	1.67	(1.16 - 2.41)	0.00628845
PTTG2	1.67	(1.1 - 2.53)	0.0159359
SHC3	1.67	(1.12 - 2.49)	0.0121942
SIGLEC11	1.67	(1.15 - 2.42)	0.0068762
SNRPF	1.67	(1.04 - 2.66)	0.0329253
SSR3	1.67	(1.07 - 2.6)	0.0237441
TBRG4	1.67	(1.13 - 2.47)	0.010677
TKT	1.67	(1.06 - 2.62)	0.027303
TPH1	1.67	(1.14 - 2.43)	0.00780706
USB1	1.67	(1.14 - 2.44)	0.0081977
WNT10A	1.67	(1.14 - 2.45)	0.0085947
ZSCAN5A	1.67	(1.13 - 2.46)	0.0100035
ABHD4	1.66	(1.15 - 2.41)	0.00747558
ABT1	1.66	(1.12 - 2.46)	0.0112714
ACMSD	1.66	(1.14 - 2.42)	0.00776451
ACOT8	1.66	(1.15 - 2.39)	0.00682476
ATP6V0C	1.66	(1.06 - 2.61)	0.0259271
BACE2	1.66	(1.16 - 2.39)	0.00610546
BCAP31	1.66	(1.11 - 2.47)	0.0129571
C1orf159	1.66	(1.16 - 2.38)	0.00548855
CHMP4C	1.66	(1.15 - 2.39)	0.00681281
CNGA3	1.66	(1.15 - 2.38)	0.00658933
DACT3	1.66	(1.14 - 2.41)	0.00877626
DAO	1.66	(1.15 - 2.4)	0.00694559
DBNDD1	1.66	(1.15 - 2.4)	0.00651511
EFHD2	1.66	(1.14 - 2.42)	0.00777322
EPS15L1	1.66	(1.04 - 2.63)	0.0331993
FANCI	1.66	(1.07 - 2.57)	0.0240361
FARSA	1.66	(1.09 - 2.53)	0.01876
FBF1	1.66	(1.13 - 2.45)	0.00963498
FHL3	1.66	(1.15 - 2.39)	0.00644339
FXN	1.66	(1.09 - 2.53)	0.0181463
GCDH	1.66	(1.08 - 2.56)	0.0217223
GSS	1.66	(1.14 - 2.42)	0.00794935
HOXA10	1.66	(1.15 - 2.39)	0.00635653
IFRD2	1.66	(1.04 - 2.66)	0.0338779
KCNH6	1.66	(1.15 - 2.41)	0.00739602
KIF18B	1.66	(1.11 - 2.49)	0.013347
LTBP4	1.66	(1.14 - 2.42)	0.00866437
LYL1	1.66	(1.15 - 2.41)	0.0071745
MYD88	1.66	(1.16 - 2.38)	0.00579787
NAA40	1.66	(1.12 - 2.48)	0.0122518
NAF1	1.66	(1.04 - 2.65)	0.0347926
NFE2L1	1.66	(1.15 - 2.41)	0.00721679
OGDH	1.66	(1.15 - 2.41)	0.00734936
PCYOX1L	1.66	(1.16 - 2.37)	0.00561484
PKDCC	1.66	(1.16 - 2.39)	0.00581333
QSOX1	1.66	(1.14 - 2.41)	0.00787713
RAB3D	1.66	(1.14 - 2.42)	0.00884293
RET	1.66	(1.11 - 2.47)	0.0137444
REXO4	1.66	(1.08 - 2.56)	0.0220519
RHBDF2	1.66	(1.15 - 2.38)	0.00672304
RNPEP	1.66	(1.15 - 2.41)	0.00671282
S1PR2	1.66	(1.13 - 2.43)	0.00946689
SDC1	1.66	(1.09 - 2.53)	0.0175349
SOX9	1.66	(1.14 - 2.43)	0.00880482
SPSB4	1.66	(1.15 - 2.39)	0.00695885
SSH3	1.66	(1.13 - 2.44)	0.00939771
TEAD4	1.66	(1.06 - 2.6)	0.0273726
TEX264	1.66	(1.11 - 2.48)	0.0128537
TFEB	1.66	(1.15 - 2.41)	0.00716358
THY1	1.66	(1.16 - 2.37)	0.00558758
TOR2A	1.66	(1.15 - 2.41)	0.00711295
TPRA1	1.66	(1.09 - 2.52)	0.0184098
UBL7	1.66	(1.15 - 2.41)	0.00704438
UNC119B	1.66	(1.15 - 2.42)	0.0072608
VPS33A	1.66	(1.13 - 2.45)	0.0095643
ZNF213	1.66	(1.15 - 2.39)	0.00675144
ADAP1	1.65	(1.14 - 2.38)	0.00786815
AEN	1.65	(1.08 - 2.53)	0.0214027
CAPNS1	1.65	(1.13 - 2.41)	0.00940355
CRAT	1.65	(1.1 - 2.47)	0.0159168
CX3CL1	1.65	(1.15 - 2.37)	0.00676119
EFTUD2	1.65	(1.13 - 2.41)	0.00879905
FLRT1	1.65	(1.15 - 2.36)	0.00603932
FLYWCH2	1.65	(1.13 - 2.41)	0.00883727
FSCN1	1.65	(1.15 - 2.36)	0.00650877
G6PD	1.65	(1.08 - 2.52)	0.0213993
GNA14	1.65	(1.14 - 2.38)	0.00787033
HRAS	1.65	(1.12 - 2.41)	0.0106485
IKBKG	1.65	(1.12 - 2.42)	0.0110948
IL17RC	1.65	(1.14 - 2.4)	0.00817775
NCKAP5L	1.65	(1.15 - 2.38)	0.00676677
NCSTN	1.65	(1.14 - 2.39)	0.00824312
NME3	1.65	(1.15 - 2.37)	0.00643542
NME4	1.65	(1.05 - 2.6)	0.0304494
NPTXR	1.65	(1.15 - 2.36)	0.00676519
OGFOD2	1.65	(1.13 - 2.42)	0.010044
OPA3	1.65	(1.13 - 2.41)	0.00890362
PANK4	1.65	(1.05 - 2.59)	0.0289514
PHF13	1.65	(1.09 - 2.49)	0.0169364
PPP1R1A	1.65	(1.07 - 2.54)	0.0239899
PSAP	1.65	(1.1 - 2.48)	0.0157796
SH2D3A	1.65	(1.15 - 2.37)	0.00654904
SMUG1	1.65	(1.1 - 2.49)	0.0159338
SNF8	1.65	(1.09 - 2.5)	0.0178716
SPR	1.65	(1.07 - 2.54)	0.0233219
SURF2	1.65	(1.12 - 2.43)	0.0108958
SYN1	1.65	(1.13 - 2.41)	0.00917165
TIMM8A	1.65	(1.04 - 2.61)	0.0330791
TNFRSF10C	1.65	(1.11 - 2.43)	0.0122688
TP53INP2	1.65	(1.09 - 2.51)	0.0182118
TYRO3	1.65	(1.15 - 2.38)	0.00698192
UBIAD1	1.65	(1.14 - 2.39)	0.00787697
ULBP1	1.65	(1.16 - 2.35)	0.00588148
AJAP1	1.64	(1.14 - 2.36)	0.00830559
ALKBH7	1.64	(1.08 - 2.51)	0.0217145
ARF3	1.64	(1.09 - 2.46)	0.0174572
BCS1L	1.64	(1.14 - 2.38)	0.00824147
C6orf106	1.64	(1.13 - 2.39)	0.00981568
C6orf223	1.64	(1.14 - 2.37)	0.00802035
CDK9	1.64	(1.11 - 2.41)	0.0124099
CSF1	1.64	(1.14 - 2.36)	0.00710437
DESI1	1.64	(1.07 - 2.51)	0.0224029
DMWD	1.64	(1.13 - 2.39)	0.00923355
DNLZ	1.64	(1.1 - 2.45)	0.0150504
DVL2	1.64	(1.14 - 2.36)	0.00789286
FER1L4	1.64	(1.14 - 2.36)	0.00781591
GAR1	1.64	(0.99 - 2.72)	0.0536992
HIC2	1.64	(1.14 - 2.36)	0.00781458
ICAM2	1.64	(1.1 - 2.44)	0.0159009
IGSF21	1.64	(1.13 - 2.38)	0.00906417
IQSEC2	1.64	(1.13 - 2.38)	0.00877701
KPNA6	1.64	(1.11 - 2.42)	0.0128684
LRRC20	1.64	(1.13 - 2.39)	0.00932196
MAPK8IP3	1.64	(1.15 - 2.35)	0.00695178
MPO	1.64	(1.15 - 2.36)	0.00699066
NCOR2	1.64	(1.14 - 2.36)	0.0078935
NDUFA7	1.64	(1.09 - 2.47)	0.0185743
NGFR	1.64	(1.1 - 2.43)	0.0140868
NOL9	1.64	(1.11 - 2.42)	0.0124843
NXN	1.64	(1.11 - 2.42)	0.0124929
PAF1	1.64	(1.1 - 2.44)	0.0147882
PCYT2	1.64	(1.13 - 2.37)	0.00863429
PIF1	1.64	(1.09 - 2.47)	0.0172293
PINX1	1.64	(1.1 - 2.45)	0.0154431
PRNP	1.64	(1.14 - 2.36)	0.00767178
PSME3	1.64	(1.12 - 2.4)	0.0109504
PUF60	1.64	(1.13 - 2.37)	0.00911901
RPUSD2	1.64	(1.08 - 2.5)	0.0196424
SBF1	1.64	(1.14 - 2.35)	0.00797864
SDCCAG3	1.64	(1.11 - 2.44)	0.0135108
SH3BP2	1.64	(1.14 - 2.36)	0.00775202
SNX17	1.64	(1.13 - 2.38)	0.00925888
SNX29P2	1.64	(1.13 - 2.37)	0.00858003
STIP1	1.64	(1.1 - 2.43)	0.0147961
TCIRG1	1.64	(1.14 - 2.36)	0.00795167
TLL2	1.64	(1.1 - 2.44)	0.0155729
TRMT1	1.64	(1.09 - 2.46)	0.0168344
AGPAT2	1.63	(1.13 - 2.37)	0.00987245
APH1A	1.63	(1.1 - 2.41)	0.0148811
C7orf50	1.63	(1.11 - 2.39)	0.0117641
CDK5R2	1.63	(1.11 - 2.4)	0.0127917
CENPM	1.63	(1.07 - 2.47)	0.0222836
CEP85	1.63	(1.14 - 2.34)	0.00763777
CNTN2	1.63	(1.11 - 2.39)	0.0126753
COLEC11	1.63	(1.07 - 2.48)	0.0239896
COX10	1.63	(1.14 - 2.34)	0.00756917
COX8A	1.63	(1.09 - 2.43)	0.0171717
CREB3L2	1.63	(1.09 - 2.44)	0.0175511
DDB2	1.63	(1.07 - 2.5)	0.0231879
DIRC2	1.63	(1.1 - 2.41)	0.014177
EMC6	1.63	(1.12 - 2.35)	0.00980822
ENO2	1.63	(1.1 - 2.41)	0.0151588
FAF1	1.63	(1.14 - 2.34)	0.00797203
FAIM2	1.63	(1.12 - 2.38)	0.0114615
FXR2	1.63	(1.14 - 2.33)	0.00706562
GEMIN7	1.63	(1.07 - 2.47)	0.0226241
GMIP	1.63	(1.13 - 2.36)	0.00853364
GRHL2	1.63	(1.13 - 2.36)	0.00965951
HSPA2	1.63	(1.13 - 2.37)	0.00933698
HSPBP1	1.63	(1.07 - 2.48)	0.0226654
KIF1A	1.63	(1.12 - 2.39)	0.0116901
KTN1	1.63	(1.13 - 2.36)	0.00890402
LDLR	1.63	(1.13 - 2.34)	0.00874979
MRPL38	1.63	(1.1 - 2.44)	0.015624
PELI3	1.63	(1.11 - 2.39)	0.0134464
PGP	1.63	(1.12 - 2.36)	0.0102737
PRELID2	1.63	(1.09 - 2.42)	0.0161204
RAD23B	1.63	(1.13 - 2.37)	0.0097661
RAPH1	1.63	(1.12 - 2.37)	0.0102698
REEP6	1.63	(1.09 - 2.43)	0.0165922
RGS16	1.63	(1.13 - 2.34)	0.00831909
RPS9	1.63	(1.07 - 2.48)	0.0241976
SCD	1.63	(1.1 - 2.4)	0.0149689
SLC7A8	1.63	(1.11 - 2.39)	0.0118819
SMAP2	1.63	(1.07 - 2.47)	0.0221895
STUB1	1.63	(1.13 - 2.34)	0.00860998
TBCB	1.63	(1.13 - 2.37)	0.00962632
TIPIN	1.63	(1.02 - 2.61)	0.0417917
TNKS1BP1	1.63	(1.13 - 2.36)	0.00966683
TRIM28	1.63	(1.07 - 2.48)	0.0231969
TUBB4B	1.63	(1.13 - 2.35)	0.00947249
WDR43	1.63	(1.06 - 2.53)	0.0274877
ZC3H3	1.63	(1.1 - 2.41)	0.0139912
ARHGAP4	1.62	(1.13 - 2.33)	0.00895761
C12orf45	1.62	(1 - 2.64)	0.0506402
CARD10	1.62	(1.13 - 2.34)	0.00953147
CATSPERB	1.62	(1.13 - 2.31)	0.00857551
CHIC2	1.62	(1.06 - 2.5)	0.0268712
CLDN6	1.62	(1.11 - 2.35)	0.0117184
CNNM2	1.62	(1.12 - 2.35)	0.0102581
CUEDC1	1.62	(1.08 - 2.44)	0.019609
DIO3	1.62	(1.12 - 2.33)	0.0096678
E2F2	1.62	(1.11 - 2.36)	0.0132269
EMC10	1.62	(1.12 - 2.35)	0.0111349
GHDC	1.62	(1.12 - 2.35)	0.011103
GLDC	1.62	(1.07 - 2.45)	0.0229005
MFAP4	1.62	(1.11 - 2.36)	0.011449
MIDN	1.62	(1.12 - 2.35)	0.0101438
MMP17	1.62	(1.12 - 2.33)	0.0102255
MRPL33	1.62	(1.07 - 2.47)	0.0233855
PDCD2L	1.62	(1.09 - 2.4)	0.0172776
PGR	1.62	(1.13 - 2.32)	0.00932613
PLXNA2	1.62	(1.12 - 2.34)	0.00993761
POLR2J	1.62	(1.09 - 2.4)	0.0161936
SH2D3C	1.62	(1.13 - 2.33)	0.00837334
SLC45A3	1.62	(1.12 - 2.35)	0.0111026
SRRM1	1.62	(1.11 - 2.36)	0.0118597
STAT5A	1.62	(1.11 - 2.36)	0.0126955
STK24	1.62	(1.07 - 2.43)	0.0217143
TMCC2	1.62	(1.12 - 2.34)	0.0101079
TMEM150A	1.62	(1.12 - 2.35)	0.0104624
TNIP2	1.62	(1.13 - 2.33)	0.00921514
TNNT3	1.62	(1.14 - 2.32)	0.00768952
ZNF341	1.62	(1.11 - 2.36)	0.012345
ZNF593	1.62	(1.12 - 2.34)	0.0105667
ARHGAP33	1.61	(1.11 - 2.34)	0.0130071
ATOH8	1.61	(1.11 - 2.34)	0.0128133
CDKL1	1.61	(1.11 - 2.31)	0.0111705
CHERP	1.61	(1.1 - 2.35)	0.0135576
CHST7	1.61	(1.11 - 2.32)	0.011112
DBH	1.61	(1.08 - 2.39)	0.0197298
DCPS	1.61	(1.07 - 2.41)	0.0209141
DNAH17	1.61	(1.11 - 2.33)	0.0122032
DOC2A	1.61	(1.06 - 2.45)	0.0246516
EIF3K	1.61	(1.12 - 2.33)	0.0106759
EPHB6	1.61	(1.11 - 2.35)	0.0125762
FAM129B	1.61	(1.11 - 2.33)	0.0121186
FBLN1	1.61	(1.1 - 2.38)	0.0153426
FOXK2	1.61	(1.07 - 2.42)	0.0218866
GLIPR1L1	1.61	(1.08 - 2.4)	0.0192292
GP5	1.61	(1.12 - 2.31)	0.00997767
JDP2	1.61	(1.12 - 2.31)	0.0101041
KLRG2	1.61	(1.04 - 2.49)	0.033582
LOC285696	1.61	(1.12 - 2.31)	0.0108356
LRFN4	1.61	(1.11 - 2.34)	0.0129831
LRP3	1.61	(1.11 - 2.33)	0.0114853
MEIS3P1	1.61	(1.1 - 2.36)	0.0150699
MIB2	1.61	(1.02 - 2.54)	0.0392107
MKS1	1.61	(1.03 - 2.51)	0.0384551
MRPL4	1.61	(0.99 - 2.62)	0.0571018
PMF1	1.61	(1.12 - 2.31)	0.010011
PRKAR1B	1.61	(1.13 - 2.3)	0.00882567
SDHAF1	1.61	(1.08 - 2.41)	0.0206385
SPATA20	1.61	(1.12 - 2.32)	0.0102632
STAMBP	1.61	(1.08 - 2.4)	0.0206971
STIM1	1.61	(1.09 - 2.36)	0.0160363
TBXAS1	1.61	(1.11 - 2.32)	0.011187
TOB1	1.61	(1.11 - 2.35)	0.0126191
TUBB3	1.61	(1.06 - 2.43)	0.0241947
ZDHHC22	1.61	(1.09 - 2.36)	0.0157287
ZFP36L2	1.61	(1.09 - 2.38)	0.0166468
ZNF428	1.61	(1.09 - 2.39)	0.0172351
ZNF689	1.61	(1.07 - 2.42)	0.0217108
ADAM17	1.6	(1.1 - 2.33)	0.0143798
ADI1	1.6	(1.1 - 2.34)	0.0144916
ALDOA	1.6	(1.1 - 2.32)	0.014233
ASS1	1.6	(1.04 - 2.46)	0.0317072
B3GNTL1	1.6	(1.07 - 2.39)	0.0212458
CAMK1	1.6	(1.1 - 2.32)	0.0139801
CDCA3	1.6	(1.09 - 2.36)	0.0163665
CHST11	1.6	(1.08 - 2.37)	0.0203909
CUL7	1.6	(1.1 - 2.33)	0.0139359
DDB1	1.6	(1.1 - 2.32)	0.0129483
DPP9	1.6	(1.11 - 2.31)	0.0120279
DPYSL5	1.6	(1.11 - 2.3)	0.0115798
EIF4ENIF1	1.6	(1.12 - 2.29)	0.010071
FBXL16	1.6	(1.1 - 2.32)	0.0142348
FKBP4	1.6	(1.04 - 2.46)	0.0337059
GIT1	1.6	(1.12 - 2.29)	0.00999386
GUCD1	1.6	(1.11 - 2.29)	0.0109789
IKZF4	1.6	(1.12 - 2.28)	0.00988021
ITGB6	1.6	(1.09 - 2.36)	0.0172368
KANK3	1.6	(1.12 - 2.29)	0.00972478
KCNJ15	1.6	(1.08 - 2.37)	0.0202519
LDHA	1.6	(1.04 - 2.46)	0.0314703
LLGL1	1.6	(1.12 - 2.28)	0.00928116
MARCKSL1	1.6	(1.09 - 2.33)	0.0159149
MBD3	1.6	(1.08 - 2.36)	0.0187671
MFSD5	1.6	(1.09 - 2.37)	0.0172987
MTHFR	1.6	(1.1 - 2.33)	0.0146025
NDUFA2	1.6	(1.09 - 2.34)	0.015354
OGFOD3	1.6	(1.1 - 2.32)	0.0145363
ORMDL2	1.6	(1.09 - 2.33)	0.015771
OXLD1	1.6	(1.07 - 2.38)	0.0213171
PITPNM3	1.6	(1.09 - 2.34)	0.0152811
PPIE	1.6	(1.11 - 2.33)	0.0129041
RAD54L	1.6	(1.06 - 2.4)	0.0243408
REPIN1	1.6	(1.11 - 2.3)	0.0117866
RILP	1.6	(1.1 - 2.32)	0.0129064
SDF4	1.6	(1.08 - 2.36)	0.018064
SFXN3	1.6	(1.11 - 2.3)	0.0116581
SHCBP1	1.6	(1.05 - 2.45)	0.030222
SHISA3	1.6	(1.03 - 2.5)	0.0373593
SLC25A44	1.6	(1.11 - 2.3)	0.0116387
SLC3A2	1.6	(1.05 - 2.43)	0.0285713
SLC9A3R1	1.6	(1.08 - 2.36)	0.0189111
STK40	1.6	(1.09 - 2.35)	0.0164123
SURF4	1.6	(1.09 - 2.35)	0.0162004
TIMM10B	1.6	(1.04 - 2.47)	0.0343751
TMEM120A	1.6	(1.12 - 2.28)	0.010269
TRAF1	1.6	(1.08 - 2.37)	0.0177911
TRAFD1	1.6	(1.11 - 2.32)	0.0117461
TYMS	1.6	(1.02 - 2.5)	0.038787
USP11	1.6	(1.1 - 2.32)	0.0138255
ARF5	1.59	(1.09 - 2.32)	0.0169915
BLCAP	1.59	(1.06 - 2.37)	0.0250708
C10orf54	1.59	(1.11 - 2.29)	0.0119182
C11orf31	1.59	(1.07 - 2.36)	0.0230638
C2orf72	1.59	(1.1 - 2.3)	0.0139692
C8orf33	1.59	(1.03 - 2.46)	0.0349575
DCDC2	1.59	(1.09 - 2.3)	0.0149804
DYRK1B	1.59	(1.11 - 2.28)	0.0120201
ELMO3	1.59	(1.09 - 2.31)	0.0153105
EMC8	1.59	(1.05 - 2.4)	0.0295805
ERN1	1.59	(1.08 - 2.33)	0.0189998
FAM104B	1.59	(0.98 - 2.56)	0.0591502
FES	1.59	(1.08 - 2.34)	0.0181541
GALK1	1.59	(1.08 - 2.33)	0.0180641
GCHFR	1.59	(1.06 - 2.37)	0.0237344
GPS2	1.59	(1.1 - 2.29)	0.0139943
HIST1H2BM	1.59	(1.05 - 2.4)	0.0272317
HIST1H3F	1.59	(1 - 2.52)	0.0509923
HPS6	1.59	(1.09 - 2.32)	0.016915
HSD3B7	1.59	(1.11 - 2.3)	0.0122293
INHA	1.59	(1.11 - 2.28)	0.0109235
KCNC1	1.59	(1.08 - 2.34)	0.0188425
MANEAL	1.59	(1.07 - 2.37)	0.0220193
MAP3K6	1.59	(1.11 - 2.28)	0.0115177
MEPCE	1.59	(1.06 - 2.39)	0.0261932
NIT1	1.59	(1.08 - 2.34)	0.018562
NMB	1.59	(1.11 - 2.29)	0.011517
NYAP1	1.59	(1.1 - 2.3)	0.0134087
ODC1	1.59	(1.04 - 2.42)	0.033627
PCSK1N	1.59	(1.08 - 2.34)	0.0197167
PGAP2	1.59	(1.03 - 2.46)	0.0383228
PIH1D1	1.59	(1.04 - 2.43)	0.0327041
RFT1	1.59	(1.02 - 2.46)	0.0403536
RIN3	1.59	(1.11 - 2.27)	0.0121763
SEC24C	1.59	(1.11 - 2.28)	0.0113763
SSX1	1.59	(1.03 - 2.45)	0.0343855
TCF7	1.59	(1.07 - 2.37)	0.0216601
TEX11	1.59	(1.1 - 2.28)	0.0125123
TM9SF1	1.59	(1.07 - 2.35)	0.0216538
TMEM52	1.59	(1.11 - 2.29)	0.0116383
TMEM99	1.59	(1.1 - 2.31)	0.0131414
ZFAND2A	1.59	(1.11 - 2.28)	0.0117357
ZYX	1.59	(1.11 - 2.27)	0.0109618
ABCF3	1.58	(1.08 - 2.33)	0.0193277
ARL6IP4	1.58	(1.1 - 2.28)	0.0143127
CABLES2	1.58	(1.08 - 2.3)	0.0171898
CCDC67	1.58	(1.09 - 2.28)	0.015886
CD44	1.58	(1.09 - 2.28)	0.0161291
CDK18	1.58	(1.09 - 2.3)	0.0160816
CKAP4	1.58	(1.09 - 2.28)	0.0145558
CNPPD1	1.58	(1.07 - 2.32)	0.0199728
CTXN1	1.58	(1.08 - 2.3)	0.0184925
CYFIP2	1.58	(1.1 - 2.28)	0.0131795
DOK5	1.58	(1.1 - 2.27)	0.013609
DOLK	1.58	(1.08 - 2.32)	0.0185631
EXOSC5	1.58	(1.01 - 2.47)	0.0463565
FAM110A	1.58	(1.09 - 2.3)	0.0157388
FBRSL1	1.58	(1.1 - 2.29)	0.0144177
FBXW9	1.58	(1.02 - 2.46)	0.0424276
GRASP	1.58	(1.09 - 2.3)	0.0167047
IGSF9	1.58	(1.04 - 2.41)	0.0327389
IP6K1	1.58	(1.09 - 2.3)	0.0162665
LINC00521	1.58	(1.07 - 2.32)	0.0204631
LMAN2L	1.58	(1.09 - 2.28)	0.0146389
LMNA	1.58	(1.1 - 2.26)	0.0127246
LRP5	1.58	(1.08 - 2.29)	0.017585
LSM12	1.58	(1.09 - 2.3)	0.0156403
MAPK3	1.58	(1.1 - 2.27)	0.0127823
MEN1	1.58	(1.05 - 2.38)	0.0287255
MPI	1.58	(1.08 - 2.32)	0.0187308
MRPL34	1.58	(1.06 - 2.36)	0.025427
MRPS18A	1.58	(1.05 - 2.37)	0.0277723
MSANTD1	1.58	(1.09 - 2.29)	0.0155391
MVB12A	1.58	(1.03 - 2.42)	0.0344685
NAPA	1.58	(1.09 - 2.31)	0.0164584
NDUFAF3	1.58	(1.03 - 2.41)	0.0354462
NDUFC1	1.58	(1.06 - 2.36)	0.0257247
NDUFS2	1.58	(1.1 - 2.26)	0.0131459
NUDT16	1.58	(1.06 - 2.35)	0.0251553
ORC1	1.58	(1.03 - 2.41)	0.0347957
PHF1	1.58	(1.09 - 2.29)	0.0164142
PLK1	1.58	(1.03 - 2.41)	0.0361495
PPP1CA	1.58	(1.07 - 2.32)	0.0201875
PRCC	1.58	(1.11 - 2.26)	0.0110399
PSMD8	1.58	(1.07 - 2.32)	0.0213971
PTBP1	1.58	(1.02 - 2.44)	0.0405226
RAB20	1.58	(1.1 - 2.28)	0.01404
RHBDD3	1.58	(1.1 - 2.27)	0.0133786
RRAD	1.58	(1.1 - 2.27)	0.0134689
SIGMAR1	1.58	(1.06 - 2.37)	0.0259822
SLC38A10	1.58	(1.04 - 2.39)	0.0324737
ST14	1.58	(1.08 - 2.3)	0.0177229
STEAP3	1.58	(1.11 - 2.27)	0.0120418
TMEM177	1.58	(1.05 - 2.38)	0.0272558
TMEM258	1.58	(1.04 - 2.38)	0.0308207
TP53I11	1.58	(1.09 - 2.28)	0.0152458
UNC45A	1.58	(1.11 - 2.26)	0.0117527
ZNF142	1.58	(1.08 - 2.3)	0.0174647
ZNF552	1.58	(1.08 - 2.33)	0.0186504
ZNF8	1.58	(1.04 - 2.41)	0.0327536
ANPEP	1.57	(1.09 - 2.27)	0.015703
BAX	1.57	(1.08 - 2.28)	0.017163
CDIPT	1.57	(1.08 - 2.27)	0.0171191
CEACAM4	1.57	(1.08 - 2.27)	0.0173617
COPG1	1.57	(1.07 - 2.3)	0.0221596
COPS7A	1.57	(1.09 - 2.28)	0.0164244
CYP26B1	1.57	(1.09 - 2.26)	0.0150886
DOT1L	1.57	(1.06 - 2.33)	0.0253763
DPP6	1.57	(1.01 - 2.45)	0.0450182
FAHD2A	1.57	(1.08 - 2.27)	0.0173593
FAM69B	1.57	(1.03 - 2.39)	0.0357277
GEMIN4	1.57	(1.06 - 2.32)	0.0234872
JPH1	1.57	(1 - 2.47)	0.0485456
LGR5	1.57	(1 - 2.48)	0.0504506
M6PR	1.57	(1.09 - 2.27)	0.0156637
MCAT	1.57	(1.04 - 2.38)	0.0331885
MCHR1	1.57	(1.08 - 2.28)	0.0178444
MMP15	1.57	(1.08 - 2.28)	0.0187525
NAA60	1.57	(1.09 - 2.25)	0.0145262
NCKIPSD	1.57	(1.04 - 2.38)	0.0327346
NUDT1	1.57	(1.04 - 2.38)	0.0313227
PHOX2A	1.57	(1.08 - 2.27)	0.0179359
PI4K2A	1.57	(1.08 - 2.27)	0.0167972
PSMD13	1.57	(1.08 - 2.28)	0.0182007
RABIF	1.57	(1.08 - 2.28)	0.0179395
RBM8A	1.57	(1.04 - 2.39)	0.0332753
RECQL5	1.57	(1.07 - 2.31)	0.021074
RHAG	1.57	(1.09 - 2.26)	0.0144445
RPL35	1.57	(1.09 - 2.28)	0.0158373
SLC27A4	1.57	(1.1 - 2.26)	0.0135206
SLC39A9	1.57	(1.05 - 2.33)	0.0272646
TALDO1	1.57	(1.06 - 2.33)	0.0244576
TBC1D16	1.57	(1.08 - 2.28)	0.0177866
TMEM127	1.57	(1.09 - 2.27)	0.0148711
TMEM54	1.57	(1.06 - 2.31)	0.0242137
TNFRSF8	1.57	(1.08 - 2.29)	0.0173329
TRAF7	1.57	(1.05 - 2.37)	0.0296989
UTP3	1.57	(0.99 - 2.49)	0.0526119
AAMP	1.56	(1.09 - 2.23)	0.0148309
ADD2	1.56	(1.09 - 2.23)	0.0148432
AGTRAP	1.56	(1.08 - 2.24)	0.0179238
ALDH3B1	1.56	(1.08 - 2.26)	0.0182377
APOE	1.56	(1.05 - 2.31)	0.0263801
C14orf93	1.56	(1.02 - 2.37)	0.0396337
C19orf60	1.56	(1.05 - 2.33)	0.0273285
CANT1	1.56	(1.04 - 2.32)	0.0296754
CCDC88C	1.56	(1.01 - 2.41)	0.046064
CCNF	1.56	(1.05 - 2.31)	0.0269613
CDCA5	1.56	(1.02 - 2.37)	0.0400838
CDCA8	1.56	(1.07 - 2.29)	0.0220735
CDK2	1.56	(1.03 - 2.39)	0.0378116
CMIP	1.56	(1.08 - 2.26)	0.0169667
COPS6	1.56	(1.09 - 2.24)	0.0149413
DDX41	1.56	(1.07 - 2.27)	0.0222906
DNASE1L1	1.56	(1.06 - 2.31)	0.0258432
DNMT3A	1.56	(1.08 - 2.27)	0.0192227
DUSP7	1.56	(1.09 - 2.24)	0.0157349
ELK1	1.56	(0.98 - 2.48)	0.0586107
FASN	1.56	(1.05 - 2.31)	0.0266631
FUT1	1.56	(1.08 - 2.26)	0.0173983
GPR162	1.56	(1 - 2.45)	0.0505225
HSPB8	1.56	(1.09 - 2.24)	0.0157587
ISOC1	1.56	(1.06 - 2.29)	0.0243122
KLF13	1.56	(1.05 - 2.32)	0.0284059
LOXL1	1.56	(1.09 - 2.24)	0.0160801
LTBR	1.56	(1.09 - 2.24)	0.0145853
MED26	1.56	(1.07 - 2.26)	0.0201191
MKI67	1.56	(1.07 - 2.29)	0.0222955
MRPS9	1.56	(1.03 - 2.36)	0.0377321
MYL5	1.56	(1.09 - 2.25)	0.0160493
NDE1	1.56	(1.08 - 2.24)	0.0173982
NFATC4	1.56	(1.04 - 2.33)	0.0320091
NUDT16L1	1.56	(1.08 - 2.25)	0.017739
PEX6	1.56	(1.08 - 2.25)	0.0183862
PIANP	1.56	(1.08 - 2.24)	0.0177132
PRR13	1.56	(1.08 - 2.25)	0.0172277
PTPN23	1.56	(1.09 - 2.24)	0.0152285
RADIL	1.56	(1.09 - 2.23)	0.0143644
RBBP4	1.56	(1.06 - 2.31)	0.0253513
RUSC2	1.56	(1.09 - 2.24)	0.0149943
SH2D5	1.56	(1.06 - 2.3)	0.0255113
SIAH2	1.56	(1.04 - 2.35)	0.0335427
SIN3B	1.56	(1.03 - 2.36)	0.0347144
SLC13A5	1.56	(1.08 - 2.24)	0.0163524
SLC29A2	1.56	(1.08 - 2.26)	0.0169231
SLC2A5	1.56	(1.05 - 2.31)	0.0262844
SLC41A1	1.56	(1.06 - 2.3)	0.0243683
SLC4A2	1.56	(1.06 - 2.3)	0.0251195
SOAT1	1.56	(1.09 - 2.23)	0.0147714
STK10	1.56	(1.09 - 2.23)	0.0157144
SYT16	1.56	(1.03 - 2.37)	0.0367574
TBC1D9B	1.56	(1.08 - 2.26)	0.0186894
TMEM109	1.56	(1.08 - 2.26)	0.0185346
TRIM62	1.56	(1.02 - 2.38)	0.0404901
TUBGCP2	1.56	(1.09 - 2.24)	0.0145541
WWP2	1.56	(1.08 - 2.24)	0.0172494
ACADS	1.55	(1.07 - 2.25)	0.0218906
AKAP5	1.55	(1.05 - 2.28)	0.0263435
ALPPL2	1.55	(1.08 - 2.21)	0.0177604
ARHGAP1	1.55	(1.05 - 2.28)	0.0270134
ASIC2	1.55	(1.07 - 2.23)	0.0193648
ATP1B2	1.55	(1.05 - 2.27)	0.0270684
ATP5SL	1.55	(1.08 - 2.22)	0.0182168
ATP6V1F	1.55	(1.08 - 2.24)	0.0178635
C19orf53	1.55	(0.98 - 2.45)	0.059866
CCDC151	1.55	(1.02 - 2.33)	0.038205
CDC6	1.55	(1.01 - 2.36)	0.0426398
CHRNB2	1.55	(1.08 - 2.23)	0.0166106
CKS2	1.55	(0.99 - 2.42)	0.0545233
CLIP2	1.55	(1.04 - 2.31)	0.0327549
CLTB	1.55	(1.07 - 2.24)	0.0197294
CYGB	1.55	(1.07 - 2.23)	0.0194102
DTX1	1.55	(1.07 - 2.23)	0.0189305
E2F3	1.55	(0.98 - 2.45)	0.0597988
EPHX1	1.55	(1.08 - 2.22)	0.0183005
ETV5	1.55	(1.07 - 2.23)	0.0194068
FITM1	1.55	(1.06 - 2.26)	0.0241549
HCFC1R1	1.55	(1.08 - 2.22)	0.0180223
HOXB8	1.55	(1.08 - 2.21)	0.0165446
ITPRIP	1.55	(1.07 - 2.26)	0.0217074
KHSRP	1.55	(1.07 - 2.23)	0.0195681
LILRB2	1.55	(1.08 - 2.22)	0.0181459
MB	1.55	(1.08 - 2.23)	0.0174488
MMP24	1.55	(1.08 - 2.22)	0.0161663
MRGPRF	1.55	(1.07 - 2.24)	0.0198566
MYBL2	1.55	(1.04 - 2.31)	0.0296682
NFATC1	1.55	(1.07 - 2.24)	0.0194689
NRM	1.55	(1.08 - 2.22)	0.0164723
NRXN2	1.55	(1.02 - 2.35)	0.0411249
POLD1	1.55	(1.01 - 2.37)	0.0433542
PPP1R10	1.55	(1.09 - 2.21)	0.0157574
PPRC1	1.55	(1.01 - 2.4)	0.0471679
PRDX5	1.55	(1.07 - 2.24)	0.021274
PTGS1	1.55	(1.06 - 2.27)	0.0248646
RAB11FIP1	1.55	(1.07 - 2.26)	0.0213092
RAB36	1.55	(1.06 - 2.26)	0.0246891
RASL10B	1.55	(0.97 - 2.47)	0.0643792
RGAG4	1.55	(1 - 2.39)	0.0483805
RIPK3	1.55	(1.07 - 2.24)	0.0212823
RMND5B	1.55	(1.08 - 2.25)	0.0189514
ROR2	1.55	(1.05 - 2.29)	0.0278396
S100P	1.55	(1.08 - 2.22)	0.017793
SEMA3F	1.55	(1.04 - 2.31)	0.0312456
SEPHS2	1.55	(1.02 - 2.33)	0.038213
SERPINH1	1.55	(1.08 - 2.21)	0.0161774
SLC29A3	1.55	(1.02 - 2.36)	0.0394793
SLIT3	1.55	(1.06 - 2.27)	0.0242845
SRCAP	1.55	(1.08 - 2.23)	0.0177165
TGIF2	1.55	(1.01 - 2.4)	0.047043
TP53	1.55	(0.99 - 2.43)	0.054304
TSPAN18	1.55	(1.08 - 2.22)	0.0172725
WFDC1	1.55	(1.08 - 2.22)	0.0177958
WSCD1	1.55	(1.04 - 2.3)	0.0316991
XRCC3	1.55	(1.08 - 2.23)	0.0167781
ZC3H18	1.55	(1.06 - 2.27)	0.0223035
ZDHHC4	1.55	(1.07 - 2.25)	0.0190326
ADAM23	1.54	(1.07 - 2.22)	0.0200363
ADPRHL2	1.54	(1.01 - 2.34)	0.0457571
ASAP3	1.54	(0.99 - 2.4)	0.0548077
C1orf122	1.54	(0.99 - 2.4)	0.0573385
CCND3	1.54	(1.07 - 2.22)	0.0212619
CELSR2	1.54	(1.06 - 2.22)	0.022865
CHST3	1.54	(1.08 - 2.21)	0.0175427
DHDDS	1.54	(1.04 - 2.27)	0.0302193
DNAJB12	1.54	(1.06 - 2.23)	0.0221896
DOK1	1.54	(1.06 - 2.24)	0.0227529
EIF1AD	1.54	(1.03 - 2.28)	0.0333436
EIF5B	1.54	(1.05 - 2.26)	0.0263441
EPPK1	1.54	(1.08 - 2.21)	0.0182588
FABP4	1.54	(1.07 - 2.23)	0.0211395
FAM160A2	1.54	(1.06 - 2.24)	0.0232251
FAU	1.54	(1.05 - 2.25)	0.02708
GBAP1	1.54	(1.07 - 2.21)	0.0197194
GOT1	1.54	(1.08 - 2.2)	0.017976
GRAMD1A	1.54	(1 - 2.36)	0.0484655
GSTK1	1.54	(1.02 - 2.33)	0.0398757
GSTM5	1.54	(1.08 - 2.2)	0.0178237
H2AFX	1.54	(0.98 - 2.4)	0.0585955
KLHDC7B	1.54	(1.04 - 2.29)	0.0325237
MAST3	1.54	(1.07 - 2.21)	0.0199942
MYC	1.54	(1.03 - 2.29)	0.0349701
NISCH	1.54	(1.07 - 2.21)	0.0213429
PDCD11	1.54	(1.05 - 2.28)	0.0290211
PITPNM2	1.54	(1.07 - 2.21)	0.0204672
PLAGL2	1.54	(1.06 - 2.25)	0.0231419
PLEKHA7	1.54	(1.05 - 2.25)	0.0274743
PLEKHG3	1.54	(1.01 - 2.36)	0.0473036
SAFB2	1.54	(1.07 - 2.23)	0.020573
SFPQ	1.54	(1.08 - 2.22)	0.0184898
SIRPA	1.54	(1.04 - 2.28)	0.0310523
SLC43A3	1.54	(1.08 - 2.2)	0.018492
SLC6A11	1.54	(0.98 - 2.43)	0.0634461
SNRPC	1.54	(1.07 - 2.21)	0.0200365
SNX21	1.54	(1.08 - 2.2)	0.0176495
STOML2	1.54	(1 - 2.37)	0.0524517
SULT1A2	1.54	(1.07 - 2.2)	0.019803
TCN2	1.54	(1.07 - 2.22)	0.0195885
TCOF1	1.54	(1.07 - 2.23)	0.0214611
TMED9	1.54	(1.07 - 2.2)	0.0197031
TMEM33	1.54	(0.99 - 2.4)	0.0559707
TMEM8B	1.54	(1.07 - 2.22)	0.0201502
TMUB2	1.54	(1.01 - 2.34)	0.0439981
TNFRSF10B	1.54	(1 - 2.37)	0.048055
TNRC18	1.54	(1.07 - 2.23)	0.0212555
TSPO	1.54	(1.04 - 2.28)	0.0325317
TSTA3	1.54	(1.03 - 2.31)	0.0355313
WDR46	1.54	(1.01 - 2.34)	0.0438565
ZDHHC5	1.54	(1.04 - 2.28)	0.0303283
ZNF580	1.54	(1.05 - 2.26)	0.0268483
ZNRF1	1.54	(1.06 - 2.22)	0.0219025
ADRBK1	1.53	(1.04 - 2.25)	0.0305753
AIPL1	1.53	(1.06 - 2.22)	0.024179
ANGPTL4	1.53	(1.06 - 2.21)	0.0238337
ANXA2R	1.53	(1.05 - 2.21)	0.0252263
AP1G2	1.53	(1.03 - 2.27)	0.0353535
AP2S1	1.53	(1.02 - 2.28)	0.0403516
ARHGAP27	1.53	(1.06 - 2.22)	0.0234118
ATF5	1.53	(1.02 - 2.3)	0.0392363
ATP6V0E2	1.53	(1.05 - 2.23)	0.0280533
C8orf58	1.53	(1.06 - 2.2)	0.0236237
CD151	1.53	(1.07 - 2.19)	0.0196052
CDCA2	1.53	(1 - 2.32)	0.0492107
CDR2L	1.53	(1.01 - 2.31)	0.0445217
COPS7B	1.53	(1.04 - 2.27)	0.0324962
CRABP1	1.53	(1.04 - 2.23)	0.0295865
DYRK4	1.53	(1.06 - 2.21)	0.0223193
FAM131A	1.53	(1.02 - 2.3)	0.0419609
FAM212B	1.53	(1.06 - 2.21)	0.0231813
FAM60A	1.53	(0.95 - 2.46)	0.0779756
GATA6	1.53	(1.06 - 2.21)	0.0238416
GLYR1	1.53	(1.07 - 2.2)	0.0208818
HPCA	1.53	(1.06 - 2.22)	0.0239526
IGSF22	1.53	(1.03 - 2.25)	0.0340145
IMP4	1.53	(0.98 - 2.38)	0.060254
JMJD6	1.53	(0.97 - 2.39)	0.0656053
KCNG3	1.53	(1.01 - 2.34)	0.0466904
LMCD1	1.53	(1.06 - 2.19)	0.0216722
MAP1A	1.53	(0.99 - 2.35)	0.0555817
MAPRE3	1.53	(1.07 - 2.21)	0.0214809
MCM3	1.53	(1.01 - 2.32)	0.0453165
MIF	1.53	(1.06 - 2.22)	0.0236426
MUTYH	1.53	(1.06 - 2.23)	0.0250126
NCAPH	1.53	(1.01 - 2.33)	0.045551
NFKBIA	1.53	(1.06 - 2.21)	0.0233604
NOP14	1.53	(0.96 - 2.44)	0.0750062
NXNL2	1.53	(1.07 - 2.18)	0.0196069
PGK1	1.53	(1.01 - 2.32)	0.0470166
PIGA	1.53	(1.01 - 2.32)	0.0459001
PNPLA3	1.53	(1.07 - 2.19)	0.0195889
PRIMA1	1.53	(1.06 - 2.19)	0.0215731
PSMA8	1.53	(1.06 - 2.21)	0.0227319
RASL11A	1.53	(1.06 - 2.2)	0.0215367
RBM15B	1.53	(0.98 - 2.39)	0.0612412
RTN2	1.53	(1.07 - 2.2)	0.0208099
SDC4	1.53	(1.05 - 2.23)	0.0266176
SLC4A3	1.53	(1.03 - 2.27)	0.033313
SNUPN	1.53	(1 - 2.33)	0.0478188
SPC24	1.53	(1.01 - 2.3)	0.0434271
SSBP3	1.53	(1.02 - 2.29)	0.0376593
TBC1D10A	1.53	(1.06 - 2.22)	0.0228639
TROAP	1.53	(1.05 - 2.24)	0.0267951
TSEN54	1.53	(1.02 - 2.3)	0.0386757
UNC5A	1.53	(1.07 - 2.2)	0.0202206
WIPF1	1.53	(1.06 - 2.22)	0.0231071
XXYLT1	1.53	(1.06 - 2.22)	0.022684
ZDHHC18	1.53	(1.06 - 2.19)	0.022429
ABI3	1.52	(1.06 - 2.19)	0.0228971
ABL1	1.52	(1.05 - 2.2)	0.0251589
ABTB2	1.52	(1.03 - 2.23)	0.0332304
C1orf53	1.52	(1.03 - 2.25)	0.0348618
CD79A	1.52	(1.05 - 2.19)	0.0256123
CDC25A	1.52	(1.01 - 2.28)	0.0461701
CTBP1	1.52	(1.06 - 2.18)	0.0236569
CYB561	1.52	(0.98 - 2.38)	0.0644129
CYB5R1	1.52	(1.04 - 2.22)	0.0316612
DAD1	1.52	(1.03 - 2.24)	0.0337999
DDX54	1.52	(0.98 - 2.38)	0.0638949
DGAT2	1.52	(0.97 - 2.4)	0.0704791
DTNBP1	1.52	(1.02 - 2.27)	0.0409844
EDAR	1.52	(1.06 - 2.18)	0.0214437
ESPL1	1.52	(1.04 - 2.21)	0.0291022
FAM110B	1.52	(1.03 - 2.25)	0.036263
FAM181B	1.52	(1.06 - 2.19)	0.0226933
FOXC2	1.52	(1.05 - 2.19)	0.0253566
FSD1	1.52	(1.04 - 2.21)	0.031237
FZD10	1.52	(1.06 - 2.16)	0.0210713
HIST2H2BE	1.52	(1.03 - 2.23)	0.0357504
IFI27L2	1.52	(1.03 - 2.23)	0.0334181
INPP5K	1.52	(1.01 - 2.3)	0.0440848
IRF2BP1	1.52	(1.02 - 2.25)	0.0382781
IRX5	1.52	(0.97 - 2.39)	0.0650746
ISLR2	1.52	(1.02 - 2.26)	0.0376862
KIAA0391	1.52	(1.01 - 2.29)	0.0443758
LPAR4	1.52	(1.05 - 2.19)	0.0276542
MAP4K2	1.52	(1.05 - 2.22)	0.028457
MNT	1.52	(1.06 - 2.17)	0.0220166
MPDU1	1.52	(1.06 - 2.18)	0.022186
MRPL12	1.52	(0.98 - 2.37)	0.0618679
MRPL37	1.52	(1.06 - 2.19)	0.0244583
NOVA2	1.52	(1.03 - 2.25)	0.035106
NQO2	1.52	(1.05 - 2.19)	0.0256096
OS9	1.52	(0.99 - 2.33)	0.0546449
PALM	1.52	(1.02 - 2.26)	0.0377583
PAWR	1.52	(1.06 - 2.18)	0.0227649
PBX4	1.52	(0.99 - 2.32)	0.0541464
PIGU	1.52	(1.03 - 2.25)	0.0332975
PLEC	1.52	(1.05 - 2.19)	0.0252545
PLEKHO1	1.52	(1.07 - 2.18)	0.0206523
PRKD2	1.52	(1.06 - 2.19)	0.024247
RUNDC3A	1.52	(1.03 - 2.25)	0.0344434
SCAMP2	1.52	(1 - 2.31)	0.0511269
SFTPB	1.52	(1.06 - 2.19)	0.0231547
SH2B2	1.52	(1.05 - 2.21)	0.0276729
SLC25A38	1.52	(0.99 - 2.34)	0.0562065
SLC27A3	1.52	(1.05 - 2.2)	0.0254999
SLCO2A1	1.52	(1.05 - 2.18)	0.0245456
SMAD6	1.52	(1.05 - 2.19)	0.024771
SPATC1L	1.52	(1.07 - 2.18)	0.0206074
TARBP2	1.52	(1.06 - 2.17)	0.0221526
TBL1X	1.52	(0.97 - 2.38)	0.0698968
TSSC1	1.52	(1.05 - 2.21)	0.0257521
TTBK1	1.52	(1.06 - 2.19)	0.0235135
TUBB4A	1.52	(1.06 - 2.17)	0.0224805
UNG	1.52	(0.99 - 2.33)	0.0557278
VSTM2L	1.52	(1.01 - 2.29)	0.0456081
ZNF385A	1.52	(1.05 - 2.21)	0.0268656
APCDD1	1.51	(1.05 - 2.18)	0.0253568
ATP13A5	1.51	(1.05 - 2.18)	0.0268557
BAG6	1.51	(1.06 - 2.17)	0.0243407
C17orf89	1.51	(0.99 - 2.29)	0.0532473
CANX	1.51	(1.02 - 2.24)	0.0396654
COX7B2	1.51	(1 - 2.26)	0.0473981
CUX2	1.51	(0.97 - 2.36)	0.0652919
DGKQ	1.51	(1.06 - 2.16)	0.0228806
DVL1	1.51	(1.04 - 2.2)	0.0310932
EDC3	1.51	(1.04 - 2.19)	0.0312828
EXOC3	1.51	(1.06 - 2.15)	0.0233727
FASTK	1.51	(1.03 - 2.21)	0.0363598
FXYD2	1.51	(1.05 - 2.15)	0.0241799
GALNT14	1.51	(0.97 - 2.35)	0.0677214
GPX1	1.51	(1.04 - 2.19)	0.030025
HK1	1.51	(1.04 - 2.19)	0.0290074
IDH3A	1.51	(1.04 - 2.2)	0.0319121
IFITM2	1.51	(1.05 - 2.18)	0.0253499
ILF3	1.51	(1.01 - 2.24)	0.0421026
KIAA0101	1.51	(0.98 - 2.32)	0.0610696
KIF4A	1.51	(0.98 - 2.32)	0.0611844
MAP2K6	1.51	(1.03 - 2.22)	0.0356324
MINK1	1.51	(1.05 - 2.17)	0.0272338
MRPL41	1.51	(1.05 - 2.17)	0.0267241
NLGN2	1.51	(1.03 - 2.2)	0.0340778
NR2F1	1.51	(1.06 - 2.16)	0.023193
PFKFB4	1.51	(1.03 - 2.21)	0.0338508
PLOD1	1.51	(1.05 - 2.16)	0.0242757
PNPLA4	1.51	(1.05 - 2.16)	0.0252254
POLR2H	1.51	(0.93 - 2.45)	0.0929288
RNF130	1.51	(1.04 - 2.2)	0.0301274
RTEL1	1.51	(1.04 - 2.18)	0.029739
SEZ6L	1.51	(1.03 - 2.22)	0.0359531
SLC25A21	1.51	(1.05 - 2.16)	0.0243411
SMARCD2	1.51	(1.04 - 2.19)	0.0287136
SPTBN2	1.51	(1.04 - 2.19)	0.0307066
STARD7	1.51	(1.02 - 2.22)	0.0380878
STPG1	1.51	(0.98 - 2.31)	0.0603405
SUGP1	1.51	(1.04 - 2.2)	0.0292712
TFPI2	1.51	(1.05 - 2.16)	0.0247948
TK1	1.51	(1.01 - 2.26)	0.0461261
TMC6	1.51	(1.05 - 2.16)	0.0252921
TMEM141	1.51	(1.04 - 2.18)	0.0297955
WDR83	1.51	(1.01 - 2.26)	0.0470621
ADCK2	1.5	(1.02 - 2.2)	0.0377471
ARID5A	1.5	(1.05 - 2.15)	0.0269722
B3GAT3	1.5	(1.01 - 2.21)	0.042757
BCL2L1	1.5	(1.04 - 2.17)	0.0281722
BIN3	1.5	(1.03 - 2.19)	0.0339839
CCDC106	1.5	(1.04 - 2.17)	0.0299057
CCDC8	1.5	(1.05 - 2.14)	0.026037
CDC37	1.5	(1.03 - 2.16)	0.0327664
CERS2	1.5	(1.05 - 2.15)	0.0263839
COL1A1	1.5	(1.05 - 2.13)	0.025507
CPT2	1.5	(1.03 - 2.19)	0.0327816
DCP1B	1.5	(1 - 2.23)	0.0476686
DHX34	1.5	(1.04 - 2.17)	0.0303624
ERCC1	1.5	(0.97 - 2.32)	0.0677109
FXYD3	1.5	(1.03 - 2.19)	0.0356876
GDI1	1.5	(1.03 - 2.19)	0.0357248
GPR156	1.5	(1.03 - 2.17)	0.0330534
GSK3A	1.5	(1.04 - 2.17)	0.0298694
GUK1	1.5	(1.05 - 2.14)	0.0258283
HNRNPUL2	1.5	(1.04 - 2.17)	0.0301185
HOXC12	1.5	(1.01 - 2.24)	0.0467039
INVS	1.5	(0.95 - 2.34)	0.0794923
LARGE	1.5	(1.05 - 2.14)	0.0269935
LMO3	1.5	(0.99 - 2.27)	0.0558189
LOXL2	1.5	(1.06 - 2.14)	0.0235347
MAPKAPK2	1.5	(1.04 - 2.17)	0.0294053
MBLAC1	1.5	(1.04 - 2.17)	0.0308109
MFSD2A	1.5	(1.04 - 2.17)	0.0297214
MOSPD3	1.5	(1.04 - 2.18)	0.0309871
NAGS	1.5	(1.04 - 2.17)	0.0305472
NANS	1.5	(1.03 - 2.18)	0.0354828
NDUFB7	1.5	(1.02 - 2.2)	0.0389659
NKD2	1.5	(1.04 - 2.16)	0.0284752
NKIRAS2	1.5	(1.04 - 2.15)	0.0294839
NOG	1.5	(1.04 - 2.16)	0.030814
PCIF1	1.5	(1.04 - 2.15)	0.0289396
PEX16	1.5	(1.01 - 2.24)	0.045572
PRR14	1.5	(1.05 - 2.14)	0.0271463
PTMS	1.5	(1.05 - 2.15)	0.0271025
PYCR1	1.5	(0.96 - 2.34)	0.0744418
RPL31	1.5	(1.04 - 2.15)	0.0301126
RPP25L	1.5	(0.98 - 2.31)	0.064273
RPRD2	1.5	(1.05 - 2.14)	0.0277725
RPS28	1.5	(1 - 2.23)	0.0477727
SCMH1	1.5	(1.03 - 2.18)	0.0323021
SECTM1	1.5	(1.04 - 2.18)	0.0304673
SENP3	1.5	(1.05 - 2.15)	0.0243011
SPC25	1.5	(0.96 - 2.36)	0.0779032
STAU1	1.5	(1.05 - 2.15)	0.0270285
SYCE3	1.5	(1.02 - 2.22)	0.0411011
TEAD3	1.5	(1.05 - 2.15)	0.0276235
THBS3	1.5	(1.03 - 2.18)	0.0352286
TLE3	1.5	(1.03 - 2.19)	0.0366846
TMEM185A	1.5	(1 - 2.24)	0.0489629
TMEM8A	1.5	(1.04 - 2.17)	0.0295495
TNIP1	1.5	(1.04 - 2.17)	0.0307471
TRAPPC3	1.5	(1.03 - 2.2)	0.035023
TRMT112	1.5	(1.01 - 2.24)	0.0459703
VAPB	1.5	(1.02 - 2.19)	0.0370041
WWC1	1.5	(0.99 - 2.29)	0.0571985
ZBTB45	1.5	(1.03 - 2.19)	0.0342049
ZDHHC14	1.5	(1.04 - 2.15)	0.0281622
ZNF775	1.5	(1.05 - 2.15)	0.0252135
ZNF780B	1.5	(1.02 - 2.2)	0.0392035
ASNA1	1.49	(0.99 - 2.23)	0.0530606
ASPSCR1	1.49	(1 - 2.22)	0.0498937
C7orf26	1.49	(1.03 - 2.18)	0.0359605
CAP1	1.49	(1.01 - 2.2)	0.0422633
CARM1	1.49	(0.98 - 2.27)	0.0637876
CCDC127	1.49	(1.01 - 2.19)	0.0443158
CD14	1.49	(1.04 - 2.14)	0.0299453
[truncated: 11,609 more rows]
