# Supplementary material for: RUVBL1 and RUVBL2 as novel druggable DNA Damage Response regulators in the N-Myc regulatory network in neuroblastoma
Source: Research Square preprint supplement (doi:10.21203/rs.3.rs-3206227/v1), 2023-11-20
Supplement: Supplementary file 3 [file 5a781ed7d30053c170f62349.xlsx]

## Sheet: legend
Pre-ranked gene set enrichement analysis using REACTOME gene set in CLB-BA cell line treated with CB-6644 for 72hrs compared to control (0hrs).

## Sheet: CLB-BA_72hrs_vs_0hrs
ID	Description	setSize	enrichmentScore	NES	pvalue	p.adjust	qvalues	rank	leading_edge	core_enrichment
TRANSLATION	TRANSLATION	273	-0.701494	-2.64848	3.01256e-36	3.57591e-33	2.46079e-33	2915	tags=59%, list=18%, signal=49%	SRPRB/N6AMT1/MRPL35/EIF2S3/RPL17/MRPL23/MRPL4/MRPS28/SEC61G/FARSA/TSFM/MRPL27/MRPL9/TRMT112/MRPL58/DARS2/EIF2B2/RPS15/RPL37A/MARS2/MRPS30/MRPL12/RPL11/RPS24/MRPL17/RPL39/RPL38/MRPS25/MRPL22/SEC11A/RPLP2/EIF4E/MRPS16/EEF1E1/RPS21/SSR1/MRPS2/RPS27/MRPS24/GADD45GIP1/MRPS23/SPCS3/SSR2/MRRF/MRPS15/AIMP2/EIF3J/SARS2/TUFM/EIF2B5/MRPS35/RPL36AL/MRPL33/RPS16/MRPL37/RPL35/MRPS26/UBA52/MRPL15/SSR3/MRPL19/EI…
RRNA_PROCESSING	RRNA_PROCESSING	198	-0.729479	-2.66421	3.69657e-32	2.19392e-29	1.50976e-29	2496	tags=63%, list=15%, signal=54%	SNU13/RPL37A/SENP3/GAR1/RPL11/RPS24/FTSJ3/RPL39/RPP25/RPL38/RPLP2/RPS21/EXOSC7/RPS27/BYSL/WDR36/HSD17B10/NOL11/UTP15/EXOSC9/EXOSC3/NAT10/EXOSC8/NOP56/LTV1/RPL36AL/NOL6/DHX37/RPS16/ELAC2/RPL35/RRP1/UBA52/MTREX/CSNK1E/DIMT1/RRP9/PES1/PNO1/DCAF13/XRN2/NOP10/WDR3/RPS25/NOB1/RPL22/WDR18/RPL41/EXOSC5/RPS28/TSR1/FAU/PELP1/RBM28/RPL23/UTP18/NOP14/RPL30/RPL36/WDR12/RPL28/EBNA1BP2/RPS23/WDR43/UTP20/RPLP1/R…
METABOLISM_OF_AMINO_ACIDS_AND_DERIVATIVES	METABOLISM_OF_AMINO_ACIDS_AND_DERIVATIVES	330	-0.637115	-2.43769	6.56674e-29	2.59824e-26	1.788e-26	2587	tags=44%, list=16%, signal=37%	PAPSS2/PSMB4/RPS15/PSMA6/RPL37A/AADAT/RPL11/RPS24/DLD/RPL39/RPL38/ALDH4A1/ENOPH1/PSMA3/RPLP2/EEF1E1/RPS21/DDC/RPS27/ETHE1/PSMA4/PSMB6/PSMC3/MCCC2/AIMP2/HSD17B10/PSMD11/PSMC4/SLC25A15/PAPSS1/RPL36AL/KYAT1/RIMKLB/CKB/PSMD3/RPS16/RPL35/NAALAD2/PDHB/UBA52/GSR/PCBD1/GRHPR/GCAT/PSMD4/GLDC/TH/RPS25/RPL22/RPL41/GCSH/RPS28/FAU/PSMA7/CHDH/NAT8L/RPL23/AIMP1/GSTZ1/RPL30/RPL36/BCKDHB/RPL28/PSMB2/RPS23/RPLP1/R…
EUKARYOTIC_TRANSLATION_INITIATION	EUKARYOTIC_TRANSLATION_INITIATION	118	-0.788718	-2.71623	1.0459e-26	3.10372e-24	2.13585e-24	2411	tags=77%, list=15%, signal=66%	RPL11/RPS24/RPL39/RPL38/RPLP2/EIF4E/RPS21/RPS27/EIF3J/EIF2B5/RPL36AL/RPS16/RPL35/UBA52/EIF4B/EIF3I/EIF3G/EIF2B3/RPS25/EIF3D/RPL22/RPL41/RPS28/FAU/RPL23/RPL30/EIF4G1/RPL36/EIF3F/RPL28/EIF5B/RPS23/RPLP1/RPL9/EIF3K/RPL5/EIF3M/RPS15A/RPS13/RPL29/RPL32/RPL35A/RPS26/RPL13/RPL24/EIF1AX/EIF3B/RPS12/RPL26/RPL22L1/RPL34/EIF3A/RPL14/RPS2/RPL15/RPL31/RPL27/RPS7/RPL19/RPL12/RPL18/RPL10A/RPS11/RPL27A/EIF2S2/RP…
SRP_DEPENDENT_COTRANSLATIONAL_PROTEIN_TARGETING_TO_MEMBRANE	SRP_DEPENDENT_COTRANSLATIONAL_PROTEIN_TARGETING_TO_MEMBRANE	111	-0.776626	-2.66152	2.40428e-24	5.70776e-22	3.92783e-22	2480	tags=71%, list=15%, signal=61%	RPL37A/RPL11/RPS24/RPL39/RPL38/SEC11A/RPLP2/RPS21/SSR1/RPS27/SPCS3/SSR2/RPL36AL/RPS16/RPL35/UBA52/SSR3/SRP9/RPS25/RPN2/RPL22/RPL41/RPS28/FAU/RPL23/SRP72/RPL30/RPL36/RPL28/RPS23/RPLP1/RPL9/RPL5/RPS15A/RPS13/RPL29/RPL32/RPL35A/RPS26/RPL13/RPL24/RPS12/RPL26/RPL22L1/RPL34/RPL14/RPS2/RPL15/RPL31/RPL27/RPS7/RPL19/RPL12/RPL18/RPL10A/RPS11/RPL27A/RPS3/RPL23A/RPS27A/RPS20/RPS3A/RPL21/RPS8/RPL7/RPL8/RPL18A…
EUKARYOTIC_TRANSLATION_ELONGATION	EUKARYOTIC_TRANSLATION_ELONGATION	92	-0.814008	-2.71417	6.61886e-24	1.30943e-21	9.01094e-22	1230	tags=67%, list=8%, signal=63%	RPS25/RPL22/RPL41/RPS28/FAU/RPL23/RPL30/EEF1B2/RPL36/RPL28/RPS23/RPLP1/RPL9/RPL5/RPS15A/RPS13/RPL29/RPL32/RPL35A/RPS26/RPL13/RPL24/RPS12/RPL26/RPL22L1/RPL34/RPL14/RPS2/RPL15/RPL31/RPL27/RPS7/RPL19/RPL12/RPL18/RPL10A/RPS11/RPL27A/RPS3/EEF1A1/RPL23A/RPS27A/RPS20/RPS3A/RPL21/RPS8/RPL7/RPL8/RPL18A/RPL13A/RPL6/RPL4/RPS14/RPSA/RPL3/EEF2/RPL10/RPL7A/RPS5/RPS4X/RPS6/RPLP0
REGULATION_OF_EXPRESSION_OF_SLITS_AND_ROBOS	REGULATION_OF_EXPRESSION_OF_SLITS_AND_ROBOS	165	-0.711225	-2.5419	8.73345e-24	1.48094e-21	1.01912e-21	2880	tags=62%, list=18%, signal=51%	LDB1/RPL17/MAGOHB/PSMA5/PSMD7/PSMB5/PSMB4/RPS15/PSMA6/RPL37A/RPL11/RPS24/MAGOH/RPL39/RPL38/PSMA3/RPLP2/UPF3A/RPS21/RPS27/PSMA4/PSMB6/PSMC3/RBX1/PSMD11/PSMC4/RPL36AL/PSMD3/RPS16/RPL35/UBA52/MSI1/PSMD4/RNPS1/RPS25/RPL22/RPL41/RPS28/FAU/PSMA7/RPL23/RPL30/EIF4G1/RPL36/RPL28/UBC/PSMB2/RPS23/RPLP1/RPL9/RPL5/RPS15A/RPS13/RPL29/RPL32/RPL35A/RPS26/RPL13/NCBP2/RPL24/GSPT1/RPS12/RPL26/RPL22L1/RPL34/PSME3/RP…
SELENOAMINO_ACID_METABOLISM	SELENOAMINO_ACID_METABOLISM	106	-0.786762	-2.6802	1.11746e-23	1.65804e-21	1.14099e-21	2587	tags=77%, list=16%, signal=66%	PAPSS2/RPS15/RPL37A/RPL11/RPS24/RPL39/RPL38/RPLP2/EEF1E1/RPS21/RPS27/AIMP2/PAPSS1/RPL36AL/RPS16/RPL35/UBA52/GSR/RPS25/RPL22/RPL41/RPS28/FAU/RPL23/AIMP1/RPL30/RPL36/RPL28/RPS23/RPLP1/RPL9/RPL5/RPS15A/RPS13/RPL29/RPL32/RPL35A/RPS26/RPL13/RPL24/SECISBP2/RPS12/RPL26/RPL22L1/RPL34/RPL14/RPS2/RPL15/RPL31/RPL27/RPS7/RPL19/RPL12/RPL18/TXNRD1/RPL10A/RPS11/CBS/RPL27A/RPS3/RPL23A/RPS27A/RPS20/RPS3A/RPL21/RP…
INFLUENZA_INFECTION	INFLUENZA_INFECTION	152	-0.715279	-2.54206	1.59051e-22	2.09771e-20	1.44355e-20	1818	tags=59%, list=11%, signal=53%	NUP35/NUP214/RPL36AL/RPS16/NUP188/PABPN1/RPL35/NUP160/UBA52/NUP37/NUP153/RPS25/RPL22/RPL41/NUP107/RPS28/FAU/NUP85/NUP205/RPL23/RPL30/RPL36/AAAS/RPL28/CALR/RPS23/RPLP1/RPL9/SEH1L/RPL5/NDC1/RPS15A/RPS13/RPL29/NUP210/RPL32/RPL35A/RPS26/RPL13/GRSF1/NUP62/RPL24/PARP1/RPS12/RPL26/RPL22L1/RPL34/RPL14/KPNB1/RPS2/RPL15/RPL31/NUP88/KPNA3/RPL27/RPS7/RPL19/RPL12/RPL18/RPL10A/RPS11/RPL27A/RAN/KPNA2/XPO1/RPS3/…
RESPONSE_OF_EIF2AK4_GCN2_TO_AMINO_ACID_DEFICIENCY	RESPONSE_OF_EIF2AK4_GCN2_TO_AMINO_ACID_DEFICIENCY	100	-0.774825	-2.61934	1.46411e-21	1.7379e-19	1.19595e-19	1230	tags=61%, list=8%, signal=57%	RPS25/RPL22/RPL41/RPS28/FAU/RPL23/RPL30/RPL36/RPL28/EIF2AK4/RPS23/RPLP1/RPL9/RPL5/RPS15A/RPS13/RPL29/RPL32/RPL35A/RPS26/RPL13/RPL24/RPS12/RPL26/RPL22L1/RPL34/RPL14/RPS2/RPL15/RPL31/RPL27/RPS7/RPL19/RPL12/RPL18/RPL10A/RPS11/RPL27A/EIF2S2/RPS3/RPL23A/RPS27A/RPS20/RPS3A/RPL21/RPS8/RPL7/RPL8/RPL18A/RPL13A/RPL6/RPL4/RPS14/RPSA/RPL3/RPL10/RPL7A/RPS5/RPS4X/RPS6/RPLP0
SIGNALING_BY_ROBO_RECEPTORS	SIGNALING_BY_ROBO_RECEPTORS	210	-0.644152	-2.36549	4.87575e-20	5.26138e-18	3.62065e-18	2880	tags=56%, list=18%, signal=47%	LDB1/RPL17/MAGOHB/PSMA5/PSMD7/CLASP1/PSMB5/PSMB4/RPS15/PSMA6/RPL37A/RPL11/RPS24/MAGOH/RPL39/RPL38/PSMA3/RPLP2/UPF3A/RPS21/PAK5/RPS27/PSMA4/FLRT3/PSMB6/CLASP2/SRGAP1/PSMC3/RBX1/PSMD11/PSMC4/RPL36AL/PSMD3/RPS16/RPL35/UBA52/MSI1/RAC1/PSMD4/RNPS1/PAK2/RPS25/RPL22/RPL41/RPS28/FAU/PSMA7/ENAH/NCK2/RPL23/EVL/RPL30/EIF4G1/RPL36/RPL28/UBC/PSMB2/RPS23/RPLP1/RPL9/RPL5/RPS15A/RPS13/RPL29/RPL32/DCC/ABL1/RPL35A…
NONSENSE_MEDIATED_DECAY_NMD	NONSENSE_MEDIATED_DECAY_NMD	114	-0.729919	-2.50627	1.27068e-18	1.25691e-16	8.64952e-17	2411	tags=71%, list=15%, signal=61%	RPL37A/RPL11/RPS24/MAGOH/RPL39/RPL38/RPLP2/UPF3A/RPS21/RPS27/PNRC2/RPL36AL/RPS16/RPL35/UBA52/PPP2CA/RNPS1/RPS25/RPL22/RPL41/RPS28/FAU/RPL23/RPL30/EIF4G1/RPL36/RPL28/RPS23/RPLP1/RPL9/RPL5/RPS15A/RPS13/RPL29/RPL32/RPL35A/RPS26/RPL13/PPP2R1A/NCBP2/RPL24/GSPT1/RPS12/RPL26/RPL22L1/RPL34/RPL14/RPS2/RPL15/RPL31/RPL27/RPS7/RPL19/RPL12/RPL18/RPL10A/RPS11/RPL27A/RPS3/RPL23A/RPS27A/RPS20/RPS3A/RPL21/RPS8/RP…
CELL_CYCLE_MITOTIC	CELL_CYCLE_MITOTIC	485	-0.495079	-1.94615	9.96016e-16	9.09439e-14	6.25837e-14	2800	tags=39%, list=17%, signal=33%	CDC27/PRIM2/PPP2R1B/PSMA5/PSMD7/TUBGCP3/CLASP1/PPP2R5E/PSMB5/VPS4A/ANAPC16/CCNE2/PSMB4/ANAPC15/PSMA6/ANAPC11/DYNLL1/MCM8/CDK1/GINS3/IST1/HAUS6/RFC2/SPAST/PSMA3/PLK4/RAB1B/RFC4/KIF20A/CEP57/CCND1/MASTL/RPS27/PSMA4/CETN2/PMF1/STAG2/USO1/PSMB6/CLASP2/ESCO2/PSMC3/HAUS8/SPC24/TUBGCP2/CTDNEP1/RBX1/TPR/PSMD11/NCAPG/UBE2I/MAX/PSMC4/ALMS1/NUP35/DCTN2/NUP214/E2F6/CKS1B/AKT1/PSMD3/NUP188/RFC3/UBE2C/BIRC5/NU…
CELLULAR_RESPONSE_TO_STARVATION	CELLULAR_RESPONSE_TO_STARVATION	151	-0.640294	-2.2731	4.15413e-14	3.52211e-12	2.42376e-12	1230	tags=42%, list=8%, signal=39%	RPS25/RPL22/RPL41/RPS28/FAU/RPL23/RPL30/RPL36/RPL28/EIF2AK4/RPS23/RPLP1/RPL9/SEH1L/RPL5/RPS15A/RRAGD/RPS13/RPL29/RPL32/RPL35A/RPS26/RPL13/RPL24/RPS12/RPL26/RPL22L1/RPL34/RPL14/RPS2/RPL15/RPL31/RPL27/RPS7/RPL19/RPL12/RPL18/RPL10A/RPS11/RPL27A/EIF2S2/RPS3/RPL23A/RPS27A/RPS20/RPS3A/RPL21/RPS8/RPL7/RPL8/RPL18A/RPL13A/RPL6/RPL4/RPS14/RPSA/RPL3/RPL10/RPL7A/RPS5/RPS4X/RPS6/RPLP0
ACTIVATION_OF_THE_MRNA_UPON_BINDING_OF_THE_CAP_BINDING_COMPLEX_AND_EIFS_AND_SUBSEQUENT_BINDING_TO_43S	ACTIVATION_OF_THE_MRNA_UPON_BINDING_OF_THE_CAP_BINDING_COMPLEX_AND_EIFS_AND_SUBSEQUENT_BINDING_TO_43S	59	-0.77672	-2.43154	4.2618e-13	3.3725e-11	2.32081e-11	2266	tags=73%, list=14%, signal=63%	RPS24/EIF4E/RPS21/RPS27/EIF3J/RPS16/EIF4B/EIF3I/EIF3G/RPS25/EIF3D/RPS28/FAU/EIF4G1/EIF3F/RPS23/EIF3K/EIF3M/RPS15A/RPS13/RPS26/EIF1AX/EIF3B/RPS12/EIF3A/RPS2/RPS7/RPS11/EIF2S2/RPS3/RPS27A/RPS20/RPS3A/RPS8/PABPC1/EIF3E/RPS14/RPSA/EIF3L/RPS5/RPS4X/EIF4EBP1/RPS6
DNA_REPLICATION	DNA_REPLICATION	128	-0.650859	-2.26468	7.72973e-13	5.73449e-11	3.94623e-11	2870	tags=55%, list=18%, signal=45%	POLA2/CDC27/PRIM2/PSMA5/PSMD7/PSMB5/ANAPC16/CCNE2/PSMB4/ANAPC15/PSMA6/ANAPC11/MCM8/GINS3/RFC2/PSMA3/RFC4/PSMA4/PSMB6/PSMC3/RBX1/PSMD11/PSMC4/PSMD3/RFC3/UBE2C/RFC1/RPA1/UBA52/POLE3/CCNE1/UBE2E1/E2F2/ORC1/PRIM1/E2F3/DBF4/PSMD4/PSMA7/POLE2/GMNN/CUL1/UBC/PSMB2/LIG1/CCNA2/MCM10/GINS2/CDC45/POLD3/FEN1/CDT1/E2F1/PSME3/POLD1/KPNB1/CDK2/DNA2/CDC6/RPS27A/MCM4/SKP2/POLD2/PCNA/MCM2/POLA1/MCM3/MCM5/MCM6/MCM7
MITOTIC_G1_PHASE_AND_G1_S_TRANSITION	MITOTIC_G1_PHASE_AND_G1_S_TRANSITION	146	-0.612945	-2.16501	8.84704e-12	6.17732e-10	4.25096e-10	2798	tags=49%, list=17%, signal=41%	PRIM2/PPP2R1B/PSMA5/PSMD7/PSMB5/CCNE2/PSMB4/PSMA6/MCM8/CDK1/PSMA3/CCND1/PSMA4/PSMB6/PSMC3/PSMD11/MAX/PSMC4/E2F6/CKS1B/AKT1/PSMD3/RPA1/UBA52/POLE3/PPP2CA/CCNE1/E2F2/E2F5/ORC1/PRIM1/E2F3/DBF4/PSMD4/TFDP1/WEE1/PSMA7/POLE2/TFDP2/GMNN/CUL1/UBC/PSMB2/CCNA2/MCM10/ABL1/CDC45/PPP2R1A/CDT1/E2F1/PSME3/CDK2/CDC25A/TOP2A/TYMS/TK1/CDC6/RPS27A/CDK4/RBBP4/MCM4/SKP2/PCNA/MCM2/POLA1/MCM3/MCM5/MCM6/MCM7/MYBL2/RRM2
S_PHASE	S_PHASE	159	-0.603799	-2.15042	1.02867e-11	6.78349e-10	4.66811e-10	2800	tags=50%, list=17%, signal=42%	CDC27/PRIM2/PSMA5/PSMD7/PSMB5/ANAPC16/CCNE2/PSMB4/ANAPC15/PSMA6/ANAPC11/MCM8/GINS3/RFC2/PSMA3/RFC4/CCND1/PSMA4/STAG2/PSMB6/ESCO2/PSMC3/RBX1/PSMD11/MAX/PSMC4/CKS1B/AKT1/PSMD3/RFC3/UBE2C/RFC1/RPA1/UBA52/POLE3/CCNE1/UBE2E1/E2F5/ORC1/PRIM1/PSMD4/SMC3/PDS5B/TFDP1/WEE1/PSMA7/POLE2/TFDP2/CUL1/UBC/PSMB2/LIG1/CCNA2/PDS5A/GINS2/CDC45/POLD3/SMC1A/FEN1/CDT1/E2F1/PSME3/POLD1/CDK2/CDC25A/DNA2/CDC6/RPS27A/CDK4/…
SYNTHESIS_OF_DNA	SYNTHESIS_OF_DNA	117	-0.643074	-2.20955	2.94156e-11	1.8377e-09	1.26463e-09	2870	tags=54%, list=18%, signal=45%	POLA2/CDC27/PRIM2/PSMA5/PSMD7/PSMB5/ANAPC16/CCNE2/PSMB4/ANAPC15/PSMA6/ANAPC11/MCM8/GINS3/RFC2/PSMA3/RFC4/PSMA4/PSMB6/PSMC3/RBX1/PSMD11/PSMC4/PSMD3/RFC3/UBE2C/RFC1/RPA1/UBA52/POLE3/CCNE1/UBE2E1/ORC1/PRIM1/PSMD4/PSMA7/POLE2/CUL1/UBC/PSMB2/LIG1/CCNA2/GINS2/CDC45/POLD3/FEN1/CDT1/PSME3/POLD1/CDK2/DNA2/CDC6/RPS27A/MCM4/SKP2/POLD2/PCNA/MCM2/POLA1/MCM3/MCM5/MCM6/MCM7
G2_M_CHECKPOINTS	G2_M_CHECKPOINTS	131	-0.608402	-2.11605	1.90796e-10	1.13238e-08	7.79253e-09	3093	tags=50%, list=19%, signal=41%	PSMB7/PSME4/BRIP1/MRE11/PSMA5/PSMD7/PSMB5/PSMB4/PSMA6/MCM8/CDK1/CLSPN/ATR/RFC2/RMI1/PSMA3/UBE2N/RFC4/KAT5/PSMA4/PSMB6/ABRAXAS1/UBE2V2/PSMC3/PSMD11/PSMC4/WRN/PSMD3/RFC3/RPA1/UBA52/BLM/ORC1/PKMYT1/DBF4/CHEK1/SUMO1/PSMD4/RHNO1/NBN/WEE1/PSMA7/CHEK2/RMI2/YWHAH/UBC/PSMB2/EXO1/YWHAQ/RBBP8/YWHAG/MCM10/CDC45/PSME3/CDK2/CDC25A/DNA2/CDC6/RPS27A/MCM4/MCM2/MCM3/MCM5/NSD2/MCM6/MCM7
METABOLISM_OF_NUCLEOTIDES	METABOLISM_OF_NUCLEOTIDES	89	-0.66723	-2.21421	2.00843e-10	1.13524e-08	7.81223e-09	1942	tags=42%, list=12%, signal=37%	NUDT5/NUDT1/PUDP/DTYMK/NT5M/DHODH/ADA/GSR/TXN/ADSL/DNPH1/AK2/ADK/AMPD2/HPRT1/GART/CAD/TYMS/PPAT/TXNRD1/ATIC/DUT/TK1/RRM1/UCK2/DCTPP1/IMPDH2/IMPDH1/PFAS/NME2/GMPS/AK4/CTPS1/NME4/NME1/RRM2/PAICS
PROCESSING_OF_CAPPED_INTRON_CONTAINING_PRE_MRNA	PROCESSING_OF_CAPPED_INTRON_CONTAINING_PRE_MRNA	239	-0.51933	-1.93563	6.24498e-10	3.36945e-08	2.31871e-08	3070	tags=46%, list=19%, signal=38%	NUP43/GTF2F2/NUP155/SF3B4/POLR2F/NUP133/CSTF2T/SRSF4/LSM6/MAGOHB/NUDT21/DHX15/CPSF4/THOC6/THOC2/SRSF9/SNU13/ALYREF/CTNNBL1/SF3A3/DDX42/MAGOH/DNAJC8/CHTOP/SNRPC/SNRPG/EIF4E/THOC5/CCAR1/THOC3/CWC27/SRSF6/ZCRB1/TPR/CPSF3/PQBP1/HNRNPH1/NUP35/NUP214/TXNL4A/SNRPE/NUP188/PABPN1/SNRNP40/NUP160/TRA2B/DHX9/WDR33/MTREX/SRSF11/NUP37/SNRPN/LSM7/NXT1/NUP153/EFTUD2/PRPF19/RNPS1/SRSF10/LSM4/SNW1/NUP107/FUS/NUP85…
GLUCOSE_METABOLISM	GLUCOSE_METABOLISM	85	-0.664918	-2.20369	8.80956e-10	4.5465e-08	3.12871e-08	2183	tags=51%, list=13%, signal=44%	PGM2L1/ALDOA/ENO2/MDH1/TPR/NUP35/NUP214/PFKFB3/NUP188/SLC25A1/NUP160/PFKFB4/PPP2CA/NUP37/ALDOC/NUP153/SLC37A4/NUP107/NUP85/NUP205/GNPDA1/AAAS/PCK2/SEH1L/NDC1/NUP210/PPP2R1A/NUP62/PKM/GOT2/NUP88/HK1/MDH2/PFKM/SLC25A13/PGK1/PGAM1/TPI1/PFKP/GPI/GAPDH/ENO1/HK2
DNA_REPLICATION_PRE_INITIATION	DNA_REPLICATION_PRE_INITIATION	85	-0.664097	-2.20097	9.4829e-10	4.69008e-08	3.22751e-08	3190	tags=65%, list=20%, signal=52%	PSMC2/PSMD1/SEM1/ORC2/PSMA2/PSMD14/PSME1/CDC7/PSMB7/PSME4/POLA2/PRIM2/PSMA5/PSMD7/PSMB5/PSMB4/PSMA6/MCM8/PSMA3/PSMA4/PSMB6/PSMC3/PSMD11/PSMC4/PSMD3/RPA1/UBA52/POLE3/E2F2/ORC1/PRIM1/E2F3/DBF4/PSMD4/PSMA7/POLE2/GMNN/UBC/PSMB2/MCM10/CDC45/CDT1/E2F1/PSME3/KPNB1/CDK2/CDC6/RPS27A/MCM4/MCM2/POLA1/MCM3/MCM5/MCM6/MCM7
CELL_CYCLE_CHECKPOINTS	CELL_CYCLE_CHECKPOINTS	254	-0.509029	-1.90703	4.82073e-09	2.28888e-07	1.57511e-07	3093	tags=43%, list=19%, signal=35%	PSMB7/NUP43/PSME4/BRIP1/CDC20/MRE11/KIF2A/NUP133/CDC27/PPP2R1B/PSMA5/PSMD7/CLASP1/PPP2R5E/PSMB5/ANAPC16/CCNE2/PSMB4/ANAPC15/PSMA6/ANAPC11/DYNLL1/MCM8/CDK1/CLSPN/ATR/RFC2/RMI1/PSMA3/UBE2N/RFC4/KAT5/RPS27/PSMA4/PMF1/PHF20/PSMB6/CLASP2/ABRAXAS1/UBE2V2/PSMC3/SPC24/PSMD11/PSMC4/WRN/PSMD3/RFC3/UBE2C/BIRC5/NUP160/RPA1/UBA52/BLM/PPP2CA/CCNE1/CENPF/UBE2E1/NUP37/ORC1/PKMYT1/DBF4/CHEK1/SUMO1/PLK1/PSMD4/DYNC…
GLYCOLYSIS	GLYCOLYSIS	68	-0.664061	-2.11719	3.90956e-08	1.78487e-06	1.22827e-06	2183	tags=53%, list=13%, signal=46%	PGM2L1/ALDOA/ENO2/TPR/NUP35/NUP214/PFKFB3/NUP188/NUP160/PFKFB4/PPP2CA/NUP37/ALDOC/NUP153/NUP107/NUP85/NUP205/GNPDA1/AAAS/SEH1L/NDC1/NUP210/PPP2R1A/NUP62/PKM/NUP88/HK1/PFKM/PGK1/PGAM1/TPI1/PFKP/GPI/GAPDH/ENO1/HK2
HOST_INTERACTIONS_OF_HIV_FACTORS	HOST_INTERACTIONS_OF_HIV_FACTORS	126	-0.570603	-1.97712	4.59189e-08	2.01873e-06	1.3892e-06	3820	tags=53%, list=23%, signal=41%	PSMC2/NUP98/PSMD1/SEM1/PSMA2/PSMD14/NUP50/NUP54/PSME1/SKP1/AP2B1/PSMB7/NUP43/PSME4/NUP155/NUP133/PSMA5/PSMD7/PSMB5/PSMB4/PSMA6/PSMA3/PSMA4/PSMB6/FYN/PSMC3/RBX1/TPR/AP2S1/PSMD11/PSMC4/NUP35/NUP214/PSMD3/NUP188/NUP160/UBA52/NUP37/PSIP1/RAC1/PSMD4/NUP153/PAK2/NUP107/PSMA7/NUP85/NUP205/AAAS/BANF1/UBC/PSMB2/SEH1L/NDC1/NUP210/RCC1/NUP62/RANBP1/PSME3/KPNB1/NUP88/SLC25A5/RAN/XPO1/RPS27A/PPIA/NPM1/HMGA1
MITOTIC_METAPHASE_AND_ANAPHASE	MITOTIC_METAPHASE_AND_ANAPHASE	227	-0.498939	-1.84795	4.81469e-08	2.04109e-06	1.40459e-06	4085	tags=53%, list=25%, signal=40%	PPP1CC/CDC26/PSMF1/PSMB1/TUBB8/CCNB1/TUBB3/TUBB1/PTTG1/FBXO5/PSMC2/NUP98/CHMP4B/BUB1/PSMD1/SEM1/PSMA2/PPP2R2A/PSMD14/NUDC/CDC23/CENPK/ZWINT/NUP54/ERCC6L/PSME1/CENPI/RAD21/ESPL1/PSMB7/NUP43/PSME4/NUP155/CDC20/KIF2A/NUP133/CDC27/PPP2R1B/PSMA5/PSMD7/CLASP1/PPP2R5E/PSMB5/VPS4A/ANAPC16/PSMB4/ANAPC15/PSMA6/ANAPC11/DYNLL1/CDK1/IST1/SPAST/PSMA3/RPS27/PSMA4/PMF1/STAG2/PSMB6/CLASP2/PSMC3/SPC24/PSMD11/UBE2I…
RRNA_MODIFICATION_IN_THE_NUCLEUS_AND_CYTOSOL	RRNA_MODIFICATION_IN_THE_NUCLEUS_AND_CYTOSOL	59	-0.690875	-2.1628	5.30021e-08	2.16943e-06	1.49291e-06	3033	tags=61%, list=19%, signal=50%	NOC4L/NOP58/MPHOSPH10/TSR3/HEATR1/EMG1/TRMT112/SNU13/GAR1/WDR36/NOL11/UTP15/NAT10/NOP56/NOL6/DHX37/DIMT1/RRP9/PNO1/DCAF13/NOP10/WDR3/UTP18/NOP14/WDR43/UTP20/PDCD11/RCL1/IMP4/RPS2/RPS7/DKC1/NHP2/RPS14/FBL/RPS6
DNA_STRAND_ELONGATION	DNA_STRAND_ELONGATION	32	-0.78543	-2.20583	7.5486e-08	2.98673e-06	2.05534e-06	2870	tags=81%, list=18%, signal=67%	POLA2/PRIM2/MCM8/GINS3/RFC2/RFC4/RFC3/RFC1/RPA1/PRIM1/LIG1/GINS2/CDC45/POLD3/FEN1/POLD1/DNA2/MCM4/POLD2/PCNA/MCM2/POLA1/MCM3/MCM5/MCM6/MCM7
M_PHASE	M_PHASE	343	-0.447921	-1.72138	1.1217e-07	4.21642e-06	2.90156e-06	3167	tags=49%, list=19%, signal=40%	PPP1CC/CDC26/NEK6/NME7/PSMF1/PSMB1/TUBB8/CCNB1/MAPK1/TUBB3/TUBB1/KIF23/PTTG1/FBXO5/PSMC2/NUP98/CHMP4B/BUB1/PSMD1/SEM1/PSMA2/PPP2R2A/PSMD14/NUDC/CDC23/NUP50/CENPK/ZWINT/PHF8/NUP54/ERCC6L/PSME1/CENPI/RAD21/ESPL1/ACTR1A/CEP290/PSMB7/NUP43/PSME4/NUP155/CDC20/KIF2A/NUP133/HAUS4/CDC27/PPP2R1B/PSMA5/PSMD7/TUBGCP3/CLASP1/PPP2R5E/PSMB5/VPS4A/ANAPC16/PSMB4/ANAPC15/PSMA6/ANAPC11/DYNLL1/CDK1/IST1/HAUS6/SPAST…
ORC1_REMOVAL_FROM_CHROMATIN	ORC1_REMOVAL_FROM_CHROMATIN	68	-0.652793	-2.08127	1.13669e-07	4.21642e-06	2.90156e-06	3820	tags=65%, list=23%, signal=50%	PSMC2/PSMD1/SEM1/ORC2/PSMA2/PSMD14/PSME1/SKP1/PSMB7/PSME4/PSMA5/PSMD7/PSMB5/PSMB4/PSMA6/MCM8/PSMA3/PSMA4/PSMB6/PSMC3/RBX1/PSMD11/PSMC4/PSMD3/UBA52/ORC1/PSMD4/PSMA7/CUL1/UBC/PSMB2/CCNA2/CDT1/PSME3/CDK2/CDC6/RPS27A/MCM4/SKP2/MCM2/MCM3/MCM5/MCM6/MCM7
REGULATION_OF_MRNA_STABILITY_BY_PROTEINS_THAT_BIND_AU_RICH_ELEMENTS	REGULATION_OF_MRNA_STABILITY_BY_PROTEINS_THAT_BIND_AU_RICH_ELEMENTS	83	-0.626211	-2.06734	1.68131e-07	6.04764e-06	4.16172e-06	3820	tags=59%, list=23%, signal=45%	PSMC2/PSMD1/SEM1/PSMA2/EXOSC6/PSMD14/PSME1/EXOSC4/MAPK14/DCP2/PSMB7/PSME4/PSMA5/PSMD7/PSMB5/PSMB4/PSMA6/PSMA3/EXOSC7/PSMA4/PSMB6/PSMC3/ZFP36L1/PSMD11/EXOSC9/EXOSC3/PSMC4/EXOSC8/NUP214/AKT1/PSMD3/KHSRP/UBA52/PSMD4/EXOSC5/PSMA7/EIF4G1/ELAVL1/UBC/PSMB2/TNPO1/PSME3/XPO1/HSPA8/RPS27A/HNRNPD/PABPC1/SET/ANP32A
SEPARATION_OF_SISTER_CHROMATIDS	SEPARATION_OF_SISTER_CHROMATIDS	183	-0.510318	-1.84063	1.85523e-07	6.47694e-06	4.45715e-06	4124	tags=51%, list=25%, signal=39%	CLIP1/PPP1CC/CDC26/PSMF1/PSMB1/TUBB8/TUBB3/TUBB1/PTTG1/PSMC2/NUP98/BUB1/PSMD1/SEM1/PSMA2/PSMD14/NUDC/CDC23/CENPK/ZWINT/ERCC6L/PSME1/CENPI/RAD21/ESPL1/PSMB7/NUP43/PSME4/CDC20/KIF2A/NUP133/CDC27/PPP2R1B/PSMA5/PSMD7/CLASP1/PPP2R5E/PSMB5/ANAPC16/PSMB4/ANAPC15/PSMA6/ANAPC11/DYNLL1/PSMA3/RPS27/PSMA4/PMF1/STAG2/PSMB6/CLASP2/PSMC3/SPC24/PSMD11/PSMC4/PSMD3/UBE2C/BIRC5/NUP160/UBA52/TUBB4A/PPP2CA/CENPF/UBE2…
THE_CITRIC_ACID_TCA_CYCLE_AND_RESPIRATORY_ELECTRON_TRANSPORT	THE_CITRIC_ACID_TCA_CYCLE_AND_RESPIRATORY_ELECTRON_TRANSPORT	172	-0.518537	-1.86062	4.70256e-07	1.59484e-05	1.0975e-05	4008	tags=48%, list=25%, signal=36%	COX20/ATP5ME/TMEM186/UQCRQ/NDUFB9/PDK3/IDH3G/SLC16A3/ATP5F1E/CYC1/UQCRB/NDUFS8/ETFA/ETFDH/MT-ATP8/ATP5MG/MPC1/NDUFAF2/UQCRFS1/SDHA/DLAT/COX6A1/SUCLG2/COX8A/COX6B1/ATP5PB/ME3/NDUFA4/NNT/NDUFS6/DLST/PDP2/NDUFB6/UQCRC2/NDUFB7/NDUFB8/NDUFS4/NDUFAF4/COX18/DLD/ACO2/ATP5F1C/NDUFV2/NDUFB11/COA1/COX6C/NDUFS1/ATP5MF/UQCRC1/ATP5PO/COX7B/NDUFB10/SUCLG1/ECSIT/ATP5F1B/COX7C/PDHB/ATP5F1D/GLO1/ATP5MC3/NDUFB4/FH/…
SWITCHING_OF_ORIGINS_TO_A_POST_REPLICATIVE_STATE	SWITCHING_OF_ORIGINS_TO_A_POST_REPLICATIVE_STATE	88	-0.606686	-2.01278	5.061e-07	1.66872e-05	1.14834e-05	3820	tags=60%, list=23%, signal=46%	PSMC2/PSMD1/SEM1/ORC2/PSMA2/PSMD14/CDC23/PSME1/SKP1/PSMB7/PSME4/CDC27/PSMA5/PSMD7/PSMB5/ANAPC16/CCNE2/PSMB4/ANAPC15/PSMA6/ANAPC11/MCM8/PSMA3/PSMA4/PSMB6/PSMC3/RBX1/PSMD11/PSMC4/PSMD3/UBE2C/UBA52/CCNE1/UBE2E1/ORC1/PSMD4/PSMA7/CUL1/UBC/PSMB2/CCNA2/CDT1/PSME3/CDK2/CDC6/RPS27A/MCM4/SKP2/MCM2/MCM3/MCM5/MCM6/MCM7
MRNA_SPLICING	MRNA_SPLICING	187	-0.508177	-1.8422	5.20616e-07	1.67019e-05	1.14935e-05	3053	tags=45%, list=19%, signal=37%	GTF2F2/SF3B4/POLR2F/CSTF2T/SRSF4/LSM6/MAGOHB/NUDT21/DHX15/CPSF4/SRSF9/SNU13/ALYREF/CTNNBL1/SF3A3/DDX42/MAGOH/DNAJC8/SNRPC/SNRPG/CCAR1/CWC27/SRSF6/ZCRB1/CPSF3/PQBP1/HNRNPH1/TXNL4A/SNRPE/PABPN1/SNRNP40/TRA2B/DHX9/WDR33/MTREX/SRSF11/SNRPN/LSM7/EFTUD2/PRPF19/RNPS1/SRSF10/LSM4/SNW1/FUS/U2SURP/SNRNP70/SNRNP35/ELAVL2/CSTF3/SF3B3/SRSF7/CPSF2/ELAVL1/SNRPD1/PAPOLA/SF1/HNRNPL/SNRPD2/HNRNPUL1/NCBP2/HNRNPA2B1…
ACTIVATION_OF_THE_PRE_REPLICATIVE_COMPLEX	ACTIVATION_OF_THE_PRE_REPLICATIVE_COMPLEX	33	-0.75036	-2.10627	6.36068e-07	1.98688e-05	1.36728e-05	1622	tags=58%, list=10%, signal=52%	RPA1/POLE3/ORC1/PRIM1/DBF4/POLE2/GMNN/MCM10/CDC45/CDT1/CDK2/CDC6/MCM4/MCM2/POLA1/MCM3/MCM5/MCM6/MCM7
METABOLISM_OF_CARBOHYDRATES	METABOLISM_OF_CARBOHYDRATES	268	-0.459845	-1.73324	7.61506e-07	2.20465e-05	1.51715e-05	2523	tags=31%, list=15%, signal=27%	FMOD/GLYCTK/PFKL/ABCC5/B4GALT5/MAN2B1/SDC2/HS6ST1/GYG1/PGM2L1/ALDOA/ST3GAL1/ENO2/MDH1/TPR/NUP35/NUP214/PFKFB3/PAPSS1/B3GALT5/SORD/NUP188/CHSY1/SLC25A1/NUP160/TALDO1/UBA52/PFKFB4/PPP2CA/PHKA1/NUP37/ALDOC/RPIA/NUP153/PGM2/NDST1/FUT11/SLC37A4/GALK1/NUP107/CALM1/HSPG2/NUP85/NUP205/GNPDA1/PRPS2/AAAS/PCK2/AKR1B1/HYAL2/UBC/SEH1L/NDC1/NUP210/SDC1/PPP2R1A/NUP62/PGLS/PKM/PGM1/GOT2/NUP88/HK1/GPC2/LUM/AKR1A1…
HCMV_INFECTION	HCMV_INFECTION	94	-0.59496	-1.99993	7.50624e-07	2.20465e-05	1.51715e-05	3070	tags=49%, list=19%, signal=40%	NUP43/NUP155/NUP133/NFKB1/VPS25/VPS4A/DYNLL1/VPS36/ELK1/NCOR2/MVB12B/SUZ12/TPR/VPS28/NUP35/NUP214/NUP188/NUP160/TUBB4A/CHMP3/EZH2/RBBP7/CREB1/NUP37/TUBB2A/HDAC3/NUP153/DYNC1I2/NUP107/NUP85/NUP205/AAAS/TBL1XR1/TBL1X/SEH1L/NDC1/NUP210/EGFR/NUP62/NUP88/HNRNPK/RBBP4/CBX1/TUBB2B/TUBA1A/TUBA1B
GLOBAL_GENOME_NUCLEOTIDE_EXCISION_REPAIR_GG_NER	GLOBAL_GENOME_NUCLEOTIDE_EXCISION_REPAIR_GG_NER	83	-0.612175	-2.021	7.27267e-07	2.20465e-05	1.51715e-05	2318	tags=43%, list=14%, signal=37%	RFC2/UBE2N/ACTL6A/RFC4/CETN2/MCRS1/UBE2V2/RBX1/UBE2I/RFC3/RFC1/INO80E/RPA1/UBA52/POLE3/SUMO1/CUL4A/DDB1/POLE2/SUMO3/PARP2/ACTB/RUVBL1/UBC/LIG1/CHD1L/POLD3/PARP1/RAD23A/RAD23B/POLD1/LIG3/RPS27A/POLD2/PCNA/SUMO2
HCMV_EARLY_EVENTS	HCMV_EARLY_EVENTS	71	-0.628854	-2.01796	1.22901e-06	3.47342e-05	2.39026e-05	3070	tags=55%, list=19%, signal=45%	NUP43/NUP155/NUP133/NFKB1/DYNLL1/ELK1/NCOR2/SUZ12/TPR/NUP35/NUP214/NUP188/NUP160/TUBB4A/EZH2/RBBP7/CREB1/NUP37/TUBB2A/HDAC3/NUP153/DYNC1I2/NUP107/NUP85/NUP205/AAAS/TBL1XR1/TBL1X/SEH1L/NDC1/NUP210/EGFR/NUP62/NUP88/RBBP4/CBX1/TUBB2B/TUBA1A/TUBA1B
GENE_AND_PROTEIN_EXPRESSION_BY_JAK_STAT_SIGNALING_AFTER_INTERLEUKIN_12_STIMULATION	GENE_AND_PROTEIN_EXPRESSION_BY_JAK_STAT_SIGNALING_AFTER_INTERLEUKIN_12_STIMULATION	33	-0.740417	-2.07836	1.4003e-06	3.86549e-05	2.66007e-05	2119	tags=52%, list=13%, signal=45%	AIP/PDCD4/TCP1/TALDO1/SOD2/HSPA9/PAK2/GSTO1/SOD1/HNRNPA2B1/HNRNPF/MTAP/LMNB1/MSN/PPIA/HNRNPDL/RPLP0
NUCLEOTIDE_BIOSYNTHESIS	NUCLEOTIDE_BIOSYNTHESIS	12	-0.895241	-2.01175	1.57466e-06	4.248e-05	2.92329e-05	1651	tags=92%, list=10%, signal=82%	DHODH/ADSL/GART/CAD/PPAT/ATIC/IMPDH2/IMPDH1/PFAS/GMPS/PAICS
DNA_REPAIR	DNA_REPAIR	282	-0.449723	-1.69751	1.68439e-06	4.44306e-05	3.05752e-05	3131	tags=39%, list=19%, signal=32%	FANCF/INO80/FANCC/PPP4C/BRIP1/POLR2F/MRE11/ERCC8/RAD51AP1/XRCC2/SMUG1/TINF2/WDR48/YY1/CENPX/RAD51/DCLRE1A/FANCE/CLSPN/FANCG/ATR/RFC2/RMI1/EME1/UBE2N/ACTL6A/RFC4/KAT5/RAD18/CETN2/MCRS1/TDP1/ABRAXAS1/UBE2V2/UBXN1/RBX1/UBE2I/WRN/DCLRE1B/UBE2T/RFC3/RFC1/INO80E/RPA1/UBA52/BLM/POLE3/CHEK1/SUMO1/MSH2/CUL4A/DDB1/PRPF19/RHNO1/NBN/PCLAF/UFD1/RIF1/XRCC6/VCP/POLE2/TCEA1/SUMO3/PARP2/NEIL2/CHEK2/TDG/RMI2/ACTB/…
G1_S_SPECIFIC_TRANSCRIPTION	G1_S_SPECIFIC_TRANSCRIPTION	29	-0.76095	-2.08976	2.41361e-06	6.22817e-05	4.28596e-05	1751	tags=59%, list=11%, signal=52%	E2F6/CCNE1/E2F5/ORC1/TFDP1/TFDP2/CDC45/CDT1/E2F1/CDC25A/TYMS/TK1/CDC6/RBBP4/PCNA/POLA1/RRM2
RECOGNITION_OF_DNA_DAMAGE_BY_PCNA_CONTAINING_REPLICATION_COMPLEX	RECOGNITION_OF_DNA_DAMAGE_BY_PCNA_CONTAINING_REPLICATION_COMPLEX	30	-0.761479	-2.11226	2.61554e-06	6.60563e-05	4.54571e-05	2318	tags=70%, list=14%, signal=60%	WDR48/RFC2/RFC4/RAD18/RBX1/RFC3/RFC1/RPA1/UBA52/POLE3/CUL4A/DDB1/POLE2/USP1/UBC/POLD3/POLD1/DTL/RPS27A/POLD2/PCNA
AUF1_HNRNP_D0_BINDS_AND_DESTABILIZES_MRNA	AUF1_HNRNP_D0_BINDS_AND_DESTABILIZES_MRNA	51	-0.660821	-2.00623	3.10817e-06	7.68624e-05	5.28934e-05	4033	tags=65%, list=25%, signal=49%	PSMF1/PSMB1/PSMC2/PSMD1/SEM1/PSMA2/PSMD14/PSME1/PSMB7/PSME4/PSMA5/PSMD7/PSMB5/PSMB4/PSMA6/PSMA3/PSMA4/PSMB6/PSMC3/PSMD11/PSMC4/PSMD3/UBA52/PSMD4/PSMA7/EIF4G1/UBC/PSMB2/PSME3/HSPA8/RPS27A/HNRNPD/PABPC1
DNA_DOUBLE_STRAND_BREAK_REPAIR	DNA_DOUBLE_STRAND_BREAK_REPAIR	132	-0.531425	-1.85415	3.49848e-06	8.4749e-05	5.83206e-05	2323	tags=39%, list=14%, signal=34%	ATR/RFC2/RMI1/EME1/UBE2N/RFC4/KAT5/TDP1/ABRAXAS1/UBE2V2/UBXN1/UBE2I/WRN/RFC3/RFC1/RPA1/UBA52/BLM/POLE3/CHEK1/SUMO1/RHNO1/NBN/RIF1/XRCC6/POLE2/PARP2/CHEK2/RMI2/UBC/EXO1/RBBP8/CCNA2/ABL1/POLD3/PARP1/FEN1/TIMELESS/SPIDR/POLD1/CDK2/DNA2/BAZ1B/KPNA2/LIG3/RPS27A/PRKDC/POLD2/PCNA/SUMO2/XRCC5/NSD2
SUMOYLATION_OF_DNA_REPLICATION_PROTEINS	SUMOYLATION_OF_DNA_REPLICATION_PROTEINS	45	-0.691409	-2.06442	3.66777e-06	8.70728e-05	5.99197e-05	1912	tags=58%, list=12%, signal=51%	TPR/UBE2I/NUP35/NUP214/NUP188/BIRC5/NUP160/TOP1/NUP37/SUMO1/NUP153/NUP107/NUP85/NUP205/SUMO3/AAAS/SEH1L/NDC1/NUP210/NUP62/NUP88/TOP2A/AURKB/PCNA/SUMO2/TOP2B
TRNA_PROCESSING	TRNA_PROCESSING	103	-0.551877	-1.87294	4.45077e-06	0.000103589	7.12858e-05	3086	tags=51%, list=19%, signal=42%	ZBTB8OS/NUP50/NUP54/PUS3/GTPBP3/POP5/NUP43/NUP155/CTU2/ADAT2/NUP133/RPP40/DUS2/CPSF4/TRMT112/CTU1/METTL1/THADA/RPP25/PUS1/TRMT61B/RTCB/TP53RK/HSD17B10/TPR/ALKBH8/RTRAF/NUP35/NUP214/NUP188/NSUN2/ELAC2/NUP160/FAM98B/NUP37/NUP153/NUP107/NUP85/NUP205/CDKAL1/AAAS/SEH1L/NDC1/NUP210/XPOT/NUP62/POP1/FTSJ1/NUP88/TSEN15/RAN/DDX1/PUS7
INTERACTIONS_OF_REV_WITH_HOST_CELLULAR_PROTEINS	INTERACTIONS_OF_REV_WITH_HOST_CELLULAR_PROTEINS	36	-0.71068	-2.0427	6.87646e-06	0.000156968	0.000108019	1912	tags=61%, list=12%, signal=54%	TPR/NUP35/NUP214/NUP188/NUP160/NUP37/NUP153/NUP107/NUP85/NUP205/AAAS/SEH1L/NDC1/NUP210/RCC1/NUP62/RANBP1/KPNB1/NUP88/RAN/XPO1/NPM1
NEGATIVE_REGULATION_OF_NOTCH4_SIGNALING	NEGATIVE_REGULATION_OF_NOTCH4_SIGNALING	51	-0.647516	-1.96584	7.20809e-06	0.000161434	0.000111092	4033	tags=65%, list=25%, signal=49%	PSMF1/PSMB1/PSMC2/PSMD1/SEM1/PSMA2/PSMD14/PSME1/SKP1/PSMB7/PSMA5/PSMD7/PSMB5/PSMB4/PSMA6/PSMA3/PSMA4/PSMB6/PSMC3/RBX1/PSMD11/PSMC4/AKT1/PSMD3/UBA52/FBXW7/PSMD4/PSMA7/CUL1/UBC/PSMB2/PSME3/RPS27A
EXTENSION_OF_TELOMERES	EXTENSION_OF_TELOMERES	51	-0.646347	-1.96229	7.74202e-06	0.000170181	0.000117111	2870	tags=57%, list=18%, signal=47%	POLA2/PRIM2/TINF2/CHTF8/GAR1/RFC2/RFC4/TERT/WRN/RFC3/RFC1/RPA1/BLM/PRIM1/NOP10/RUVBL1/LIG1/CCNA2/POLD3/FEN1/POLD1/DSCC1/CDK2/DNA2/DKC1/NHP2/POLD2/PCNA/POLA1
RHOBTB2_GTPASE_CYCLE	RHOBTB2_GTPASE_CYCLE	23	-0.782454	-2.04603	9.81243e-06	0.00021177	0.000145731	640	tags=43%, list=4%, signal=42%	TRA2B/DBN1/CCT2/MSI2/CCT7/CCT6A/HSP90AA1/HNRNPC/RBMX/HSP90AB1
PROCESSING_OF_DNA_DOUBLE_STRAND_BREAK_ENDS	PROCESSING_OF_DNA_DOUBLE_STRAND_BREAK_ENDS	64	-0.608995	-1.92945	1.08942e-05	0.000230919	0.000158908	2445	tags=52%, list=15%, signal=44%	PPP4C/BRIP1/MRE11/CLSPN/ATR/RFC2/RMI1/UBE2N/RFC4/KAT5/ABRAXAS1/UBE2V2/UBE2I/WRN/RFC3/RPA1/UBA52/BLM/CHEK1/SUMO1/RHNO1/NBN/RMI2/UBC/EXO1/RBBP8/CCNA2/TIMELESS/CDK2/DNA2/RPS27A/SUMO2/NSD2
MITOCHONDRIAL_TRANSLATION	MITOCHONDRIAL_TRANSLATION	94	-0.563418	-1.8939	1.24419e-05	0.000254629	0.000175225	2889	tags=41%, list=18%, signal=34%	MRPL35/MRPL23/MRPL4/MRPS28/TSFM/MRPL27/MRPL9/MRPL58/MRPS30/MRPL12/MRPL17/MRPS25/MRPL22/MRPS16/MRPS2/MRPS24/GADD45GIP1/MRPS23/MRRF/MRPS15/TUFM/MRPS35/MRPL33/MRPL37/MRPS26/MRPL15/MRPL19/MRPL48/MRPL54/PTCD3/MRPL14/OXA1L/MRPS34/MRPL3/MRPL24/MRPL42/MRPL30/MRPS27/MRPL11
FORMATION_OF_TUBULIN_FOLDING_INTERMEDIATES_BY_CCT_TRIC	FORMATION_OF_TUBULIN_FOLDING_INTERMEDIATES_BY_CCT_TRIC	23	-0.779733	-2.03891	1.2426e-05	0.000254629	0.000175225	1727	tags=52%, list=11%, signal=47%	TCP1/TUBB4A/TUBB2A/CCT4/CCT2/CCT7/CCT6A/CCT5/CCT3/TUBB2B/TUBA1A/TUBA1B
UNWINDING_OF_DNA	UNWINDING_OF_DNA	12	-0.868724	-1.95216	1.30238e-05	0.000262021	0.000180311	691	tags=67%, list=4%, signal=64%	GINS2/CDC45/MCM4/MCM2/MCM3/MCM5/MCM6/MCM7
HOMOLOGY_DIRECTED_REPAIR	HOMOLOGY_DIRECTED_REPAIR	104	-0.538451	-1.82646	1.57826e-05	0.000312233	0.000214865	3022	tags=48%, list=19%, signal=39%	PPP4C/BRIP1/MRE11/RAD51AP1/XRCC2/RAD51/CLSPN/ATR/RFC2/RMI1/EME1/UBE2N/RFC4/KAT5/ABRAXAS1/UBE2V2/UBE2I/WRN/RFC3/RFC1/RPA1/UBA52/BLM/POLE3/CHEK1/SUMO1/RHNO1/NBN/POLE2/PARP2/RMI2/UBC/EXO1/RBBP8/CCNA2/ABL1/POLD3/PARP1/FEN1/TIMELESS/SPIDR/POLD1/CDK2/DNA2/LIG3/RPS27A/POLD2/PCNA/SUMO2/NSD2
SUMOYLATION	SUMOYLATION	167	-0.485192	-1.73619	1.62941e-05	0.000317066	0.000218191	2205	tags=32%, list=14%, signal=28%	NCOR2/SCMH1/CETN2/STAG2/PIAS2/NR4A2/SUZ12/TPR/UBE2I/NUP35/NUP214/WRN/NUP188/BIRC5/NUP160/RPA1/TOP1/BLM/SIN3A/NUP37/SUMO1/SAFB/NUP153/CTBP1/SMC3/MTA1/NUP107/NUP85/NUP205/SUMO3/AAAS/TDG/SEH1L/NDC1/NUP210/NUP62/PARP1/SMC1A/NUP88/UBA2/HNRNPK/TOP2A/DNMT1/AURKB/CBX2/HDAC2/TFAP2B/CBX5/PCNA/SUMO2/HNRNPC/TOP2B/NPM1
DOWNSTREAM_SIGNALING_EVENTS_OF_B_CELL_RECEPTOR_BCR	DOWNSTREAM_SIGNALING_EVENTS_OF_B_CELL_RECEPTOR_BCR	77	-0.57071	-1.85096	2.1025e-05	0.000402528	0.000277002	4033	tags=51%, list=25%, signal=38%	PSMF1/PSMB1/RASGRP1/PSMC2/PSMD1/SEM1/PSMA2/PSMD14/PSME1/SKP1/PSMB7/PSME4/NFKB1/PSMA5/PSMD7/PSMB5/PSMB4/PPP3CA/PSMA6/PSMA3/PSMA4/NFATC3/PSMB6/PSMC3/PSMD11/PSMC4/PSMD3/UBA52/PSMD4/NRAS/CALM1/PSMA7/CUL1/UBC/PSMB2/FKBP1A/PSME3/RPS27A/PPIA
SIGNALING_BY_WNT	SIGNALING_BY_WNT	249	-0.44401	-1.66129	2.14116e-05	0.000403423	0.000277618	3727	tags=38%, list=23%, signal=30%	SEM1/DKK1/WLS/PSMA2/PSMD14/VPS29/CXXC4/PORCN/PSME1/FZD4/GSK3B/AXIN1/SKP1/GNG10/TCF4/CBY1/VPS35/TNRC6A/ROR2/AP2B1/TCF7L2/PSMB7/PSME4/CLTA/CTBP2/KREMEN2/PPP2R1B/PSMA5/PSMD7/PPP2R5E/PSMB5/TMED5/PSMB4/PPP3CA/RNF146/PSMA6/TCF7/PSMA3/KAT5/PYGO2/PSMA4/PRICKLE1/GNB1/PSMB6/GNB3/PSMC3/RBX1/AP2S1/PSMD11/TERT/PSMC4/FZD3/GNG12/AKT1/DACT1/PSMD3/MOV10/UBA52/CSNK1E/PPP2CA/ROR1/LRP5/RAC1/PSMD4/ZNRF3/SOX13/CTBP1/P…
MISMATCH_REPAIR	MISMATCH_REPAIR	15	-0.843648	-1.99223	2.2867e-05	0.000424111	0.000291855	1622	tags=67%, list=10%, signal=60%	RPA1/MSH2/EXO1/LIG1/MLH1/POLD3/POLD1/MSH6/POLD2/PCNA
REGULATION_OF_CHOLESTEROL_BIOSYNTHESIS_BY_SREBP_SREBF	REGULATION_OF_CHOLESTEROL_BIOSYNTHESIS_BY_SREBP_SREBF	55	-0.629857	-1.93606	2.35829e-05	0.000430659	0.000296361	1245	tags=38%, list=8%, signal=35%	LSS/GPAM/SP1/TBL1XR1/SREBF2/TBL1X/DHCR7/NFYA/KPNB1/INSIG1/SQLE/FDFT1/HMGCR/RAN/ELOVL6/SREBF1/HMGCS1/FDPS/CARM1/SCD/FASN
APC_C_MEDIATED_DEGRADATION_OF_CELL_CYCLE_PROTEINS	APC_C_MEDIATED_DEGRADATION_OF_CELL_CYCLE_PROTEINS	85	-0.558899	-1.85232	2.55379e-05	0.000449053	0.000309019	4077	tags=60%, list=25%, signal=45%	CDC26/PSMF1/PSMB1/CCNB1/PTTG1/FBXO5/PSMC2/PSMD1/SEM1/PSMA2/PSMD14/CDC23/PSME1/SKP1/PSMB7/PSME4/CDC20/CDC27/PSMA5/PSMD7/PSMB5/ANAPC16/PSMB4/ANAPC15/PSMA6/ANAPC11/CDK1/PSMA3/PSMA4/PSMB6/PSMC3/PSMD11/PSMC4/PSMD3/UBE2C/UBA52/UBE2E1/PLK1/PSMD4/PSMA7/BUB1B/CUL1/UBC/PSMB2/CCNA2/PSME3/CDK2/AURKB/MAD2L1/RPS27A/SKP2
THE_ROLE_OF_GTSE1_IN_G2_M_PROGRESSION_AFTER_G2_CHECKPOINT	THE_ROLE_OF_GTSE1_IN_G2_M_PROGRESSION_AFTER_G2_CHECKPOINT	71	-0.586055	-1.88062	2.5725e-05	0.000449053	0.000309019	4033	tags=61%, list=25%, signal=46%	PSMF1/PSMB1/TUBB8/CCNB1/TUBB3/TUBB1/PSMC2/PSMD1/SEM1/PSMA2/PSMD14/PSME1/PSMB7/PSME4/PSMA5/PSMD7/PSMB5/PSMB4/PSMA6/CDK1/PSMA3/PSMA4/PSMB6/PSMC3/PSMD11/PSMC4/PSMD3/UBA52/TUBB4A/TUBB2A/PLK1/PSMD4/PSMA7/UBC/PSMB2/PSME3/MAPRE1/RPS27A/HSP90AA1/TUBB2B/TUBA1A/TUBA1B/HSP90AB1
RESOLUTION_OF_ABASIC_SITES_AP_SITES	RESOLUTION_OF_ABASIC_SITES_AP_SITES	37	-0.683157	-1.98187	2.56713e-05	0.000449053	0.000309019	1690	tags=57%, list=10%, signal=51%	RFC2/RFC4/RFC3/RFC1/RPA1/POLE3/POLE2/PARP2/NEIL2/TDG/LIG1/NTHL1/POLD3/PARP1/FEN1/POLD1/APEX1/UNG/LIG3/POLD2/PCNA
NUCLEAR_IMPORT_OF_REV_PROTEIN	NUCLEAR_IMPORT_OF_REV_PROTEIN	33	-0.698137	-1.95968	2.72876e-05	0.000469426	0.000323039	1912	tags=61%, list=12%, signal=54%	TPR/NUP35/NUP214/NUP188/NUP160/NUP37/NUP153/NUP107/NUP85/NUP205/AAAS/SEH1L/NDC1/NUP210/RCC1/NUP62/KPNB1/NUP88/RAN/NPM1
COOPERATION_OF_PREFOLDIN_AND_TRIC_CCT_IN_ACTIN_AND_TUBULIN_FOLDING	COOPERATION_OF_PREFOLDIN_AND_TRIC_CCT_IN_ACTIN_AND_TUBULIN_FOLDING	29	-0.723878	-1.98795	3.03838e-05	0.000515223	0.000354554	1727	tags=48%, list=11%, signal=43%	TCP1/TUBB4A/TUBB2A/CCT4/ACTB/PFDN2/CCT2/CCT7/CCT6A/CCT5/CCT3/TUBB2B/TUBA1A/TUBA1B
FATTY_ACYL_COA_BIOSYNTHESIS	FATTY_ACYL_COA_BIOSYNTHESIS	33	-0.695653	-1.9527	3.17245e-05	0.000530381	0.000364985	2101	tags=36%, list=13%, signal=32%	SCD5/ACSL3/SLC25A1/ACSL4/CBR4/ELOVL2/ELOVL5/ACSL1/ELOVL6/ACLY/SCD/FASN
ACTIVATION_OF_GENE_EXPRESSION_BY_SREBF_SREBP	ACTIVATION_OF_GENE_EXPRESSION_BY_SREBF_SREBP	42	-0.653574	-1.91898	3.46106e-05	0.000570595	0.000392659	1546	tags=43%, list=9%, signal=39%	LSS/GPAM/SP1/TBL1XR1/SREBF2/TBL1X/DHCR7/NFYA/SQLE/FDFT1/HMGCR/ELOVL6/SREBF1/HMGCS1/FDPS/CARM1/SCD/FASN
TP53_REGULATES_TRANSCRIPTION_OF_CELL_DEATH_GENES	TP53_REGULATES_TRANSCRIPTION_OF_CELL_DEATH_GENES	41	0.617238	2.00677	3.93332e-05	0.000639569	0.000440124	1516	tags=41%, list=9%, signal=38%	TNFRSF10B/PIDD1/NDRG1/TP53INP1/TP53/CHM/BAX/TP53I3/PMAIP1/TNFRSF10A/AIFM2/TRIAP1/FAS/IGFBP3/CREBBP/TNFRSF10C/BBC3
METABOLISM_OF_STEROIDS	METABOLISM_OF_STEROIDS	130	-0.501235	-1.7416	4.01851e-05	0.000644591	0.00044358	1610	tags=25%, list=10%, signal=22%	HSD11B2/LSS/FABP6/MSMO1/GPAM/SP1/OSBPL1A/AKR1B1/TBL1XR1/SREBF2/TBL1X/DHCR7/ACAT2/NFYA/TSPO/DHCR24/LBR/KPNB1/HSD17B4/INSIG1/SQLE/FDFT1/HMGCR/RAN/ELOVL6/SREBF1/HMGCS1/FDPS/SUMO2/CARM1/SCD/FASN
POSITIVE_EPIGENETIC_REGULATION_OF_RRNA_EXPRESSION	POSITIVE_EPIGENETIC_REGULATION_OF_RRNA_EXPRESSION	42	-0.651151	-1.91187	4.1665e-05	0.000659417	0.000453783	1561	tags=38%, list=10%, signal=35%	RBBP7/MTA1/POLR1B/ACTB/POLR1E/KAT2A/GATAD2A/TAF1D/CBX3/POLR1A/MYBBP1A/BAZ1B/HDAC2/RBBP4/DEK/DDX21
SNRNP_ASSEMBLY	SNRNP_ASSEMBLY	53	-0.634444	-1.93645	4.54482e-05	0.000709829	0.000488474	3812	tags=68%, list=23%, signal=52%	NUP98/PRMT5/NUP50/NUP54/GEMIN7/DDX20/NUP43/GEMIN4/NUP155/NUP133/SNRPG/TPR/NUP35/NUP214/SNRPE/NUP188/NUP160/NUP37/NUP153/NUP107/NUP85/NUP205/CLNS1A/AAAS/SNRPD1/SEH1L/NDC1/SNRPD2/NUP210/WDR77/NCBP2/NUP62/SNRPF/NUP88/SNRPB/GEMIN5
TRNA_PROCESSING_IN_THE_NUCLEUS	TRNA_PROCESSING_IN_THE_NUCLEUS	55	-0.619237	-1.90342	4.73986e-05	0.000730678	0.000502821	3086	tags=58%, list=19%, signal=47%	POP5/NUP43/NUP155/NUP133/RPP40/CPSF4/RPP25/RTCB/TPR/RTRAF/NUP35/NUP214/NUP188/ELAC2/NUP160/FAM98B/NUP37/NUP153/NUP107/NUP85/NUP205/AAAS/SEH1L/NDC1/NUP210/XPOT/NUP62/POP1/NUP88/TSEN15/RAN/DDX1
REGULATION_OF_HMOX1_EXPRESSION_AND_ACTIVITY	REGULATION_OF_HMOX1_EXPRESSION_AND_ACTIVITY	62	-0.585679	-1.85628	5.20056e-05	0.00077653	0.000534374	4033	tags=56%, list=25%, signal=43%	PSMF1/PSMB1/PSMC2/PSMD1/SEM1/PSMA2/PSMD14/BACH1/PSME1/SKP1/PSMB7/PSME4/PSMA5/PSMD7/PSMB5/PSMB4/PSMA6/PSMA3/PSMA4/PSMB6/PSMC3/RBX1/PSMD11/PSMC4/PSMD3/UBA52/PSMD4/PSMA7/CUL1/UBC/PSMB2/CSNK2A1/PSME3/RPS27A/SKP2
PCNA_DEPENDENT_LONG_PATCH_BASE_EXCISION_REPAIR	PCNA_DEPENDENT_LONG_PATCH_BASE_EXCISION_REPAIR	21	-0.763812	-1.97913	5.21234e-05	0.00077653	0.000534374	2318	tags=67%, list=14%, signal=57%	RFC2/RFC4/RFC3/RFC1/RPA1/POLE3/POLE2/LIG1/POLD3/FEN1/POLD1/APEX1/POLD2/PCNA
GAP_FILLING_DNA_REPAIR_SYNTHESIS_AND_LIGATION_IN_GG_NER	GAP_FILLING_DNA_REPAIR_SYNTHESIS_AND_LIGATION_IN_GG_NER	25	-0.740418	-1.98091	5.23356e-05	0.00077653	0.000534374	2318	tags=64%, list=14%, signal=55%	RFC2/RFC4/RFC3/RFC1/RPA1/UBA52/POLE3/POLE2/UBC/LIG1/POLD3/POLD1/LIG3/RPS27A/POLD2/PCNA
LAGGING_STRAND_SYNTHESIS	LAGGING_STRAND_SYNTHESIS	20	-0.776185	-1.97048	6.12122e-05	0.000897023	0.000617293	2870	tags=80%, list=18%, signal=66%	POLA2/PRIM2/RFC2/RFC4/RFC3/RFC1/RPA1/PRIM1/LIG1/POLD3/FEN1/POLD1/DNA2/POLD2/PCNA/POLA1
MITOTIC_G2_G2_M_PHASES	MITOTIC_G2_G2_M_PHASES	189	-0.458992	-1.66835	6.20699e-05	0.000898499	0.000618309	2762	tags=37%, list=17%, signal=31%	PPP2R1B/PSMA5/PSMD7/TUBGCP3/CLASP1/PSMB5/PSMB4/PSMA6/DYNLL1/CDK1/HAUS6/PSMA3/PLK4/CEP57/PSMA4/CETN2/PSMB6/PSMC3/HAUS8/TUBGCP2/RBX1/PSMD11/PSMC4/ALMS1/DCTN2/PSMD3/UBA52/TUBB4A/MZT2A/CSNK1E/PPP2CA/CENPF/TUBB2A/PKMYT1/E2F3/PLK1/PSMD4/CENPJ/DYNC1I2/CDK5RAP2/HAUS1/WEE1/CEP152/PSMA7/CKAP5/CUL1/UBC/PSMB2/TUBG1/CCNA2/YWHAG/PPP2R1A/MZT2B/PPP1CB/E2F1/CEP78/PSME3/CDK2/CDC25A/MAPRE1/XPO1/RPS27A/HSP90AA1/RBBP…
GLUCONEOGENESIS	GLUCONEOGENESIS	30	-0.712603	-1.97668	6.71164e-05	0.000959846	0.000660524	2149	tags=53%, list=13%, signal=46%	ALDOA/ENO2/MDH1/SLC25A1/ALDOC/SLC37A4/PCK2/GOT2/MDH2/SLC25A13/PGK1/PGAM1/TPI1/GPI/GAPDH/ENO1
TRANSPORT_OF_MATURE_TRANSCRIPT_TO_CYTOPLASM	TRANSPORT_OF_MATURE_TRANSCRIPT_TO_CYTOPLASM	82	-0.548774	-1.80711	6.8351e-05	0.000965864	0.000664666	3070	tags=55%, list=19%, signal=45%	NUP43/NUP155/NUP133/SRSF4/MAGOHB/CPSF4/THOC6/THOC2/SRSF9/ALYREF/MAGOH/CHTOP/EIF4E/THOC5/THOC3/SRSF6/TPR/CPSF3/NUP35/NUP214/NUP188/NUP160/WDR33/SRSF11/NUP37/NXT1/NUP153/RNPS1/NUP107/NUP85/NUP205/SRSF7/AAAS/CPSF2/SEH1L/NDC1/NUP210/NCBP2/NUP62/SRSF3/NUP88/SLBP/SYMPK/SRSF1/SRSF2
DECTIN_1_MEDIATED_NONCANONICAL_NF_KB_SIGNALING	DECTIN_1_MEDIATED_NONCANONICAL_NF_KB_SIGNALING	57	-0.602912	-1.86549	7.06559e-05	0.000986689	0.000678997	4033	tags=54%, list=25%, signal=41%	PSMF1/PSMB1/PSMC2/PSMD1/SEM1/PSMA2/PSMD14/PSME1/SKP1/PSMB7/PSME4/PSMA5/PSMD7/PSMB5/PSMB4/PSMA6/PSMA3/PSMA4/PSMB6/PSMC3/PSMD11/PSMC4/PSMD3/UBA52/PSMD4/PSMA7/CUL1/UBC/PSMB2/PSME3/RPS27A
DEGRADATION_OF_GLI1_BY_THE_PROTEASOME	DEGRADATION_OF_GLI1_BY_THE_PROTEASOME	56	-0.607178	-1.86771	7.59804e-05	0.00104764	0.000720938	4033	tags=57%, list=25%, signal=43%	PSMF1/PSMB1/PSMC2/PSMD1/SEM1/PSMA2/PSMD14/PSME1/SKP1/PSMB7/PSME4/PSMA5/PSMD7/PSMB5/PSMB4/PSMA6/PSMA3/PSMA4/PSMB6/PSMC3/RBX1/PSMD11/PSMC4/PSMD3/UBA52/PSMD4/PSMA7/CUL1/UBC/PSMB2/PSME3/RPS27A
PENTOSE_PHOSPHATE_PATHWAY	PENTOSE_PHOSPHATE_PATHWAY	14	-0.823964	-1.9092	7.67855e-05	0.00104764	0.000720938	1621	tags=57%, list=10%, signal=52%	TALDO1/RPIA/PGM2/PRPS2/PGLS/PRPS1/PGD/TKT
DEGRADATION_OF_AXIN	DEGRADATION_OF_AXIN	52	-0.620171	-1.89028	8.42731e-05	0.00113673	0.000782248	4033	tags=60%, list=25%, signal=45%	PSMF1/PSMB1/PSMC2/PSMD1/SEM1/PSMA2/PSMD14/PSME1/AXIN1/PSMB7/PSME4/PSMA5/PSMD7/PSMB5/PSMB4/RNF146/PSMA6/PSMA3/PSMA4/PSMB6/PSMC3/PSMD11/PSMC4/PSMD3/UBA52/PSMD4/PSMA7/UBC/PSMB2/PSME3/RPS27A
INTERACTIONS_OF_VPR_WITH_HOST_CELLULAR_PROTEINS	INTERACTIONS_OF_VPR_WITH_HOST_CELLULAR_PROTEINS	35	-0.681833	-1.95575	8.85478e-05	0.00118097	0.000812692	1912	tags=57%, list=12%, signal=51%	TPR/NUP35/NUP214/NUP188/NUP160/NUP37/PSIP1/NUP153/NUP107/NUP85/NUP205/AAAS/BANF1/SEH1L/NDC1/NUP210/NUP62/NUP88/SLC25A5/HMGA1
PTEN_REGULATION	PTEN_REGULATION	133	-0.480589	-1.68046	9.33409e-05	0.00121753	0.000837855	4109	tags=52%, list=25%, signal=39%	TNRC6B/USP13/PSMF1/PSMB1/MAPK1/LAMTOR4/STUB1/PSMC2/PSMD1/MTOR/SEM1/PSMA2/PSMD14/LAMTOR1/RHEB/MBD3/REST/PSME1/MLST8/LAMTOR2/TNRC6A/CHD4/CBX6/PSMB7/PSME4/EGR1/PTEN/RNF2/PSMA5/PSMD7/PPARG/PSMB5/PSMB4/RNF146/PSMA6/OTUD3/PHC2/PSMA3/SCMH1/PSMA4/PSMB6/SUZ12/MAF1/PSMC3/PSMD11/PSMC4/AKT1/PSMD3/MOV10/UBA52/EZH2/RBBP7/HDAC3/PSMD4/MTA1/PSMA7/USP7/UBC/PSMB2/CSNK2A1/RRAGD/PSME3/GATAD2A/AGO2/CBX2/HDAC2/RPS27A/R…
APC_C_CDH1_MEDIATED_DEGRADATION_OF_CDC20_AND_OTHER_APC_C_CDH1_TARGETED_PROTEINS_IN_LATE_MITOSIS_EARLY_G1	APC_C_CDH1_MEDIATED_DEGRADATION_OF_CDC20_AND_OTHER_APC_C_CDH1_TARGETED_PROTEINS_IN_LATE_MITOSIS_EARLY_G1	71	-0.566527	-1.81795	9.24634e-05	0.00121753	0.000837855	4077	tags=59%, list=25%, signal=45%	CDC26/PSMF1/PSMB1/PTTG1/PSMC2/PSMD1/SEM1/PSMA2/PSMD14/CDC23/PSME1/PSMB7/PSME4/CDC20/CDC27/PSMA5/PSMD7/PSMB5/ANAPC16/PSMB4/ANAPC15/PSMA6/ANAPC11/PSMA3/PSMA4/PSMB6/PSMC3/PSMD11/PSMC4/PSMD3/UBE2C/UBA52/UBE2E1/PLK1/PSMD4/PSMA7/UBC/PSMB2/PSME3/AURKB/RPS27A/SKP2
TELOMERE_C_STRAND_LAGGING_STRAND_SYNTHESIS	TELOMERE_C_STRAND_LAGGING_STRAND_SYNTHESIS	34	-0.670705	-1.90674	9.51374e-05	0.00122748	0.000844698	2870	tags=62%, list=18%, signal=51%	POLA2/PRIM2/TINF2/CHTF8/RFC2/RFC4/WRN/RFC3/RFC1/RPA1/BLM/PRIM1/LIG1/POLD3/FEN1/POLD1/DSCC1/DNA2/POLD2/PCNA/POLA1
CDT1_ASSOCIATION_WITH_THE_CDC6_ORC_ORIGIN_COMPLEX	CDT1_ASSOCIATION_WITH_THE_CDC6_ORC_ORIGIN_COMPLEX	56	-0.602421	-1.85308	9.68634e-05	0.00123631	0.000850775	4033	tags=62%, list=25%, signal=47%	PSMF1/PSMB1/PSMC2/PSMD1/SEM1/ORC2/PSMA2/PSMD14/PSME1/PSMB7/PSME4/PSMA5/PSMD7/PSMB5/PSMB4/PSMA6/MCM8/PSMA3/PSMA4/PSMB6/PSMC3/PSMD11/PSMC4/PSMD3/UBA52/ORC1/PSMD4/PSMA7/GMNN/UBC/PSMB2/CDT1/PSME3/CDC6/RPS27A
UCH_PROTEINASES	UCH_PROTEINASES	82	-0.541857	-1.78433	0.000105614	0.00132925	0.000914731	4184	tags=55%, list=26%, signal=41%	FOXK1/ASXL2/PSMF1/PSMB1/PSMC2/PSMD1/SEM1/PSMA2/PSMD14/PSME1/NEDD8/INO80/PSMB7/PSME4/PSMA5/PSMD7/UCHL5/PSMB5/YY1/PSMB4/PSMA6/PSMA3/ACTL6A/PSMA4/MCRS1/PSMB6/PSMC3/PSMD11/PSMC4/KDM1B/PSMD3/INO80E/UBA52/HCFC1/PSMD4/OGT/PSMA7/ACTB/RUVBL1/UBC/PSMB2/UCHL1/PSME3/FOXK2/RPS27A
CYCLIN_A_CDK2_ASSOCIATED_EVENTS_AT_S_PHASE_ENTRY	CYCLIN_A_CDK2_ASSOCIATED_EVENTS_AT_S_PHASE_ENTRY	83	-0.547883	-1.80876	0.000107504	0.00132925	0.000914731	2760	tags=45%, list=17%, signal=37%	PSMA5/PSMD7/PSMB5/CCNE2/PSMB4/PSMA6/PSMA3/CCND1/PSMA4/PSMB6/PSMC3/PSMD11/MAX/PSMC4/CKS1B/AKT1/PSMD3/UBA52/CCNE1/E2F5/PSMD4/TFDP1/WEE1/PSMA7/TFDP2/CUL1/UBC/PSMB2/CCNA2/E2F1/PSME3/CDK2/CDC25A/RPS27A/CDK4/RBBP4/SKP2
REGULATION_OF_PTEN_STABILITY_AND_ACTIVITY	REGULATION_OF_PTEN_STABILITY_AND_ACTIVITY	65	-0.58323	-1.85761	0.000106574	0.00132925	0.000914731	4087	tags=55%, list=25%, signal=42%	USP13/PSMF1/PSMB1/STUB1/PSMC2/PSMD1/SEM1/PSMA2/PSMD14/PSME1/PSMB7/PSME4/PTEN/PSMA5/PSMD7/PSMB5/PSMB4/RNF146/PSMA6/OTUD3/PSMA3/PSMA4/PSMB6/PSMC3/PSMD11/PSMC4/AKT1/PSMD3/UBA52/PSMD4/PSMA7/UBC/PSMB2/CSNK2A1/PSME3/RPS27A
HIV_INFECTION	HIV_INFECTION	223	-0.436374	-1.61261	0.000108629	0.00132931	0.000914774	3820	tags=42%, list=23%, signal=33%	PSMC2/NUP98/CHMP4B/PSMD1/POLR2K/SEM1/PSMA2/GTF2H3/PSMD14/NUP50/NUP54/TAF9B/POLR2D/PSME1/NELFB/SKP1/AP2B1/PSMB7/NUP43/GTF2F2/PSME4/NUP155/POLR2F/NUP133/PSMA5/PSMD7/GTF2E2/PSMB5/VPS4A/PSMB4/PSMA6/TAF5/PSMA3/MVB12B/PSMA4/NMT1/TAF4B/PSMB6/FYN/PSMC3/RBX1/TPR/AP2S1/PSMD11/VPS28/PSMC4/NUP35/NUP214/PSMD3/NUP188/NUP160/UBA52/CHMP3/NUP37/PSIP1/RAC1/NEDD4L/PSMD4/NUP153/PAK2/NELFA/NUP107/XRCC6/PSMA7/NUP85/TC…
CHROMATIN_MODIFYING_ENZYMES	CHROMATIN_MODIFYING_ENZYMES	199	-0.443135	-1.61882	0.000114628	0.00135581	0.000933013	3299	tags=41%, list=20%, signal=33%	KDM7A/RUVBL2/ELP6/ELP1/PRMT3/KDM5C/CHD4/KDM4C/SAP30/NFKB1/SUV39H2/SETD6/EP400/JADE3/NSD3/MEAF6/WDR5/PHF21A/COPRS/KMT2E/MSL2/MORF4L2/HAT1/KAT8/ACTL6A/SAP30L/DOT1L/TAF6L/NCOR2/TAF5L/KAT5/CCND1/MCRS1/PHF20/JADE1/SMARCA2/SUZ12/SMARCE1/MORF4L1/KDM1B/MSL1/TADA1/PRMT6/SMYD2/EZH2/YEATS4/RBBP7/EHMT1/YEATS2/MRGBP/HCFC1/SMARCC2/HDAC3/ING5/OGT/SMARCD1/VPS72/KDM3B/MTA1/ELP2/SMARCD2/TBL1XR1/ACTB/RUVBL1/TBL1X/P…
RESOLUTION_OF_SISTER_CHROMATID_COHESION	RESOLUTION_OF_SISTER_CHROMATID_COHESION	121	-0.489423	-1.68838	0.000115364	0.00135581	0.000933013	3983	tags=45%, list=24%, signal=35%	TUBB8/CCNB1/TUBB3/TUBB1/NUP98/BUB1/NUDC/CENPK/ZWINT/ERCC6L/CENPI/RAD21/NUP43/CDC20/KIF2A/NUP133/PPP2R1B/CLASP1/PPP2R5E/DYNLL1/CDK1/RPS27/PMF1/STAG2/CLASP2/SPC24/BIRC5/NUP160/TUBB4A/PPP2CA/CENPF/NUP37/TUBB2A/PLK1/DYNC1I2/SMC3/PDS5B/NUP107/NUP85/CKAP5/BUB1B/SEH1L/PDS5A/PPP2R1A/SMC1A/KNTC1/RCC2/AURKB/MAPRE1/XPO1/MAD2L1/CENPH/TUBB2B/TUBA1A/TUBA1B
EARLY_PHASE_OF_HIV_LIFE_CYCLE	EARLY_PHASE_OF_HIV_LIFE_CYCLE	13	-0.83927	-1.91712	0.000114654	0.00135581	0.000933013	1490	tags=62%, list=9%, signal=56%	PSIP1/XRCC6/BANF1/LIG1/FEN1/XRCC5/PPIA/HMGA1
INTERCONVERSION_OF_NUCLEOTIDE_DI_AND_TRIPHOSPHATES	INTERCONVERSION_OF_NUCLEOTIDE_DI_AND_TRIPHOSPHATES	28	-0.717679	-1.96359	0.000113464	0.00135581	0.000933013	1799	tags=54%, list=11%, signal=48%	DTYMK/GSR/TXN/AK2/TYMS/TXNRD1/DUT/RRM1/DCTPP1/NME2/AK4/CTPS1/NME4/NME1/RRM2
PHASE_II_CONJUGATION_OF_COMPOUNDS	PHASE_II_CONJUGATION_OF_COMPOUNDS	71	-0.5621	-1.80375	0.000117011	0.00136168	0.000937052	2993	tags=39%, list=18%, signal=32%	MGST3/UGDH/N6AMT1/GCLC/TRMT112/PAPSS2/GCLM/ABHD14B/PAPSS1/TPST2/MGST1/GSTM1/CHAC1/GSTO1/GSTP1/GSTZ1/CNDP2/GGCT/COMT/GSTA4/MAT2B/GSS/ESD/MTR/AKR1A1/PODXL2/MAT2A/AHCY
MITOCHONDRIAL_PROTEIN_IMPORT	MITOCHONDRIAL_PROTEIN_IMPORT	60	-0.585192	-1.83837	0.000125558	0.00141948	0.000976826	4128	tags=63%, list=25%, signal=47%	CHCHD5/MTX2/TOMM40/TIMM23/FXN/IDH3G/CYC1/TIMM10/COA6/DNAJC19/GRPEL1/GRPEL2/TIMM50/TIMM8A/NDUFB8/TOMM22/TOMM70/CHCHD4/PMPCB/ACO2/CHCHD3/TOMM7/TIMM9/TIMM13/COQ2/TOMM5/COA4/TIMM17B/ATP5F1B/HSPA9/ATP5MC1/CHCHD2/ATP5F1A/CS/SLC25A13/VDAC1/HSPD1/TOMM20
BASE_EXCISION_REPAIR	BASE_EXCISION_REPAIR	44	-0.635052	-1.8749	0.000125565	0.00141948	0.000976826	1690	tags=52%, list=10%, signal=47%	SMUG1/TINF2/RFC2/RFC4/RFC3/RFC1/RPA1/POLE3/POLE2/PARP2/NEIL2/TDG/LIG1/NTHL1/POLD3/PARP1/FEN1/POLD1/APEX1/UNG/LIG3/POLD2/PCNA
RHOBTB_GTPASE_CYCLE	RHOBTB_GTPASE_CYCLE	35	-0.675778	-1.93838	0.000123615	0.00141948	0.000976826	640	tags=43%, list=4%, signal=41%	ACTN1/PDE5A/ACTG1/RNF20/ROCK2/TRA2B/DBN1/CCT2/MSI2/CCT7/CCT6A/HSP90AA1/HNRNPC/RBMX/HSP90AB1
NUCLEAR_ENVELOPE_NE_REASSEMBLY	NUCLEAR_ENVELOPE_NE_REASSEMBLY	71	-0.559159	-1.79431	0.000128466	0.00142513	0.000980715	1884	tags=41%, list=12%, signal=36%	UBE2I/NUP35/NUP188/NUP160/TUBB4A/CHMP3/PPP2CA/NUP37/TUBB2A/SUMO1/NUP107/NUP85/NUP205/BANF1/SEH1L/NDC1/TNPO1/VRK1/RCC1/PPP2R1A/NUP62/LBR/KPNB1/TMPO/RAN/LMNB1/TUBB2B/TUBA1A/TUBA1B
REGULATION_OF_RUNX2_EXPRESSION_AND_ACTIVITY	REGULATION_OF_RUNX2_EXPRESSION_AND_ACTIVITY	69	-0.564035	-1.80561	0.000127383	0.00142513	0.000980715	4033	tags=58%, list=25%, signal=44%	PSMD9/ESRRA/PSMF1/PSMB1/STUB1/PSMC2/PSMD1/SEM1/PSMA2/PSMD14/PSME1/GSK3B/SKP1/PSMB7/PSME4/PSMA5/PSMD7/PSMB5/PSMB4/PSMA6/PSMA3/PSMA4/PSMB6/PSMC3/RBX1/TWIST1/PSMD11/PSMC4/PSMD3/UBA52/FBXW7/PSMD4/PPARGC1B/PSMA7/CUL1/UBC/PSMB2/PSME3/RPS27A/SKP2
PROTEIN_UBIQUITINATION	PROTEIN_UBIQUITINATION	64	-0.57041	-1.8072	0.000133089	0.00146275	0.0010066	3353	tags=58%, list=21%, signal=46%	UBE2Z/UBA1/WAC/PEX13/RNF152/RNF20/UBE2Q2/UBE2G2/UBE2N/HLTF/RAD18/CDC34/PEX5/SHPRH/PEX2/UBE2V2/UBE2D3/UBE2T/UBA6/UBE2C/UBA52/UBE2E1/UBE2D2/RTF1/UBE2L3/UBE2K/VCP/USP7/UBC/UBE2G1/UBE2E3/LEO1/USP5/UBE2R2/RPS27A/PRKDC/PCNA
EPIGENETIC_REGULATION_OF_GENE_EXPRESSION	EPIGENETIC_REGULATION_OF_GENE_EXPRESSION	82	-0.538386	-1.7729	0.000142141	0.00154791	0.0010652	2002	tags=30%, list=12%, signal=27%	SUZ12/RRP8/SIN3A/EZH2/RBBP7/MTF2/MTA1/TET1/POLR1B/TDG/ACTB/POLR1E/KAT2A/GATAD2A/TAF1D/CBX3/POLR1A/DNMT1/MYBBP1A/BAZ1B/HDAC2/UHRF1/RBBP4/DEK/DDX21
RESOLUTION_OF_AP_SITES_VIA_THE_MULTIPLE_NUCLEOTIDE_PATCH_REPLACEMENT_PATHWAY	RESOLUTION_OF_AP_SITES_VIA_THE_MULTIPLE_NUCLEOTIDE_PATCH_REPLACEMENT_PATHWAY	24	-0.740115	-1.96151	0.000147719	0.00159403	0.00109694	2318	tags=67%, list=14%, signal=57%	RFC2/RFC4/RFC3/RFC1/RPA1/POLE3/POLE2/PARP2/LIG1/POLD3/PARP1/FEN1/POLD1/APEX1/POLD2/PCNA
GAP_JUNCTION_ASSEMBLY	GAP_JUNCTION_ASSEMBLY	26	-0.703145	-1.89616	0.000157081	0.00167978	0.00115595	1612	tags=27%, list=10%, signal=24%	TUBB4A/GJD2/TUBB2A/GJC1/TUBB2B/TUBA1A/TUBA1B
RESPIRATORY_ELECTRON_TRANSPORT_ATP_SYNTHESIS_BY_CHEMIOSMOTIC_COUPLING_AND_HEAT_PRODUCTION_BY_UNCOUPLING_PROTEINS	RESPIRATORY_ELECTRON_TRANSPORT_ATP_SYNTHESIS_BY_CHEMIOSMOTIC_COUPLING_AND_HEAT_PRODUCTION_BY_UNCOUPLING_PROTEINS	124	-0.484319	-1.67421	0.000162111	0.00169954	0.00116955	4658	tags=53%, list=29%, signal=38%	NDUFA10/NDUFV3/TMEM126B/COX5B/NDUFA12/SDHB/NDUFB3/MT-CO3/COX4I1/NUBPL/COX14/COX20/ATP5ME/TMEM186/UQCRQ/NDUFB9/ATP5F1E/CYC1/UQCRB/NDUFS8/ETFA/ETFDH/MT-ATP8/ATP5MG/NDUFAF2/UQCRFS1/SDHA/COX6A1/COX8A/COX6B1/ATP5PB/NDUFA4/NDUFS6/NDUFB6/UQCRC2/NDUFB7/NDUFB8/NDUFS4/NDUFAF4/COX18/ATP5F1C/NDUFV2/NDUFB11/COA1/COX6C/NDUFS1/ATP5MF/UQCRC1/ATP5PO/COX7B/NDUFB10/ECSIT/ATP5F1B/COX7C/ATP5F1D/ATP5MC3/NDUFB4/ATP5MC1…
NS1_MEDIATED_EFFECTS_ON_HOST_PATHWAYS	NS1_MEDIATED_EFFECTS_ON_HOST_PATHWAYS	40	-0.637035	-1.85992	0.000163224	0.00169954	0.00116955	1912	tags=60%, list=12%, signal=53%	NUP43/NUP155/NUP133/CPSF4/TPR/NUP35/NUP214/NUP188/PABPN1/NUP160/NUP37/NUP153/NUP107/NUP85/NUP205/AAAS/SEH1L/NDC1/NUP210/NUP62/KPNB1/NUP88/KPNA3/KPNA2
DUAL_INCISION_IN_GG_NER	DUAL_INCISION_IN_GG_NER	40	-0.637083	-1.86006	0.000163224	0.00169954	0.00116955	2318	tags=50%, list=14%, signal=43%	RFC2/RFC4/RBX1/RFC3/RFC1/RPA1/UBA52/POLE3/CUL4A/DDB1/POLE2/PARP2/UBC/CHD1L/POLD3/PARP1/POLD1/RPS27A/POLD2/PCNA
INTERLEUKIN_35_SIGNALLING	INTERLEUKIN_35_SIGNALLING	12	0.835681	1.99124	0.000176101	0.001802	0.00124006	987	tags=50%, list=6%, signal=47%	STAT3/JAK1/STAT1/TYK2/IL6ST/JAK2
SUMOYLATION_OF_SUMOYLATION_PROTEINS	SUMOYLATION_OF_SUMOYLATION_PROTEINS	34	-0.657098	-1.86805	0.000175158	0.001802	0.00124006	1912	tags=56%, list=12%, signal=49%	TPR/UBE2I/NUP35/NUP214/NUP188/NUP160/NUP37/SUMO1/NUP153/NUP107/NUP85/NUP205/AAAS/SEH1L/NDC1/NUP210/NUP62/NUP88/SUMO2
SCF_SKP2_MEDIATED_DEGRADATION_OF_P27_P21	SCF_SKP2_MEDIATED_DEGRADATION_OF_P27_P21	58	-0.576213	-1.79308	0.000178906	0.00181506	0.00124905	4033	tags=66%, list=25%, signal=50%	PSMF1/PSMB1/PSMC2/PSMD1/SEM1/PSMA2/PSMD14/PSME1/SKP1/PSMB7/PSMA5/PSMD7/PSMB5/CCNE2/PSMB4/PSMA6/PSMA3/CCND1/PSMA4/PSMB6/PSMC3/PSMD11/PSMC4/CKS1B/PSMD3/UBA52/CCNE1/PSMD4/PSMA7/CUL1/UBC/PSMB2/CCNA2/PSME3/CDK2/RPS27A/CDK4/SKP2
DEGRADATION_OF_BETA_CATENIN_BY_THE_DESTRUCTION_COMPLEX	DEGRADATION_OF_BETA_CATENIN_BY_THE_DESTRUCTION_COMPLEX	81	-0.542437	-1.77916	0.000193664	0.00194813	0.00134062	4033	tags=54%, list=25%, signal=41%	PSMF1/PSMB1/PSMC2/PSMD1/SEM1/PSMA2/PSMD14/PSME1/GSK3B/AXIN1/SKP1/TCF7L2/PSMB7/PSME4/CTBP2/PPP2R1B/PSMA5/PSMD7/PPP2R5E/PSMB5/PSMB4/PSMA6/TCF7/PSMA3/PSMA4/PSMB6/PSMC3/RBX1/PSMD11/PSMC4/PSMD3/UBA52/PPP2CA/PSMD4/CTBP1/TLE1/PSMA7/CUL1/UBC/PSMB2/AMER1/PPP2R1A/PSME3/RPS27A
PROTEIN_FOLDING	PROTEIN_FOLDING	92	-0.531834	-1.77331	0.000205598	0.0020169	0.00138794	2067	tags=35%, list=13%, signal=31%	GNB1/GNB3/FKBP9/NOP56/GNG12/TCP1/TUBB4A/FBXW7/CCNE1/TUBB2A/XRN2/HDAC3/AP3M1/DCAF7/CCT4/TBCA/ACTB/CSNK2A1/PFDN2/CCT2/TBCD/GNG5/ARL2/GNB4/CCT7/CCT6A/CCT5/CCT3/GNG4/TUBB2B/TUBA1A/TUBA1B
INTERLEUKIN_12_SIGNALING	INTERLEUKIN_12_SIGNALING	41	-0.628193	-1.83738	0.000205187	0.0020169	0.00138794	2185	tags=44%, list=13%, signal=38%	P4HB/AIP/PDCD4/TCP1/TALDO1/SOD2/HSPA9/PAK2/GSTO1/SOD1/HNRNPA2B1/HNRNPF/MTAP/LMNB1/MSN/PPIA/HNRNPDL/RPLP0
ACTIVATION_OF_ATR_IN_RESPONSE_TO_REPLICATION_STRESS	ACTIVATION_OF_ATR_IN_RESPONSE_TO_REPLICATION_STRESS	37	-0.646739	-1.87622	0.000204865	0.0020169	0.00138794	2478	tags=57%, list=15%, signal=48%	MCM8/CLSPN/ATR/RFC2/RFC4/RFC3/RPA1/ORC1/DBF4/CHEK1/MCM10/CDC45/CDK2/CDC25A/CDC6/MCM4/MCM2/MCM3/MCM5/MCM6/MCM7
CELLULAR_RESPONSE_TO_CHEMICAL_STRESS	CELLULAR_RESPONSE_TO_CHEMICAL_STRESS	148	-0.46868	-1.66241	0.000209154	0.00203496	0.00140037	3093	tags=41%, list=19%, signal=33%	PSMB7/COX6A1/PSME4/TXN2/COX8A/CAT/COX6B1/NDUFA4/PSMA5/PSMD7/PSMB5/PSMB4/PSMA6/COX18/NUDT2/PSMA3/NCOR2/P4HB/COX6C/PSMA4/ATP7A/PSMB6/PSMC3/COX7B/BLVRA/RBX1/PSMD11/PSMC4/ERO1A/PSMD3/COX7C/UBA52/SIN3A/GSR/TXNIP/HDAC3/PSMD4/SOD2/GPX7/TXN/PSMA7/GSTP1/PRDX2/TBL1XR1/LRPPRC/CUL1/UBC/PSMB2/TBL1X/SOD1/CSNK2A1/PRDX3/PSME3/PRDX6/TXNRD1/COX5A/PRDX1/RPS27A/SKP2/CARM1
HEDGEHOG_OFF_STATE	HEDGEHOG_OFF_STATE	109	-0.495613	-1.69227	0.000219583	0.00208055	0.00143174	4033	tags=50%, list=25%, signal=38%	PSMF1/PSMB1/IFT52/IFT88/TUBB3/TUBB1/PSMC2/PSMD1/PRKAR1B/SEM1/ADCY7/PSMA2/PSMD14/PSME1/GSK3B/SKP1/PSMB7/PSME4/ADCY3/PSMA5/PSMD7/SMO/PTCH1/PSMB5/PSMB4/PSMA6/IFT122/PSMA3/GNAS/ADCY9/PSMA4/PSMB6/TTC21B/PSMC3/RBX1/PSMD11/PSMC4/PSMD3/WDR35/UBA52/TUBB4A/TUBB2A/PSMD4/PSMA7/CUL1/UBC/PSMB2/PSME3/GPR161/PRKAR2A/RPS27A/TUBB2B/TUBA1A/TUBA1B
SUMOYLATION_OF_CHROMATIN_ORGANIZATION_PROTEINS	SUMOYLATION_OF_CHROMATIN_ORGANIZATION_PROTEINS	54	-0.603729	-1.84869	0.000219237	0.00208055	0.00143174	3070	tags=57%, list=19%, signal=47%	NUP43/NUP155/NUP133/RNF2/PHC2/SCMH1/PIAS2/SUZ12/TPR/UBE2I/NUP35/NUP214/NUP188/NUP160/NUP37/SUMO1/NUP153/NUP107/NUP85/NUP205/SUMO3/AAAS/SEH1L/NDC1/NUP210/NUP62/NUP88/CBX2/HDAC2/CBX5/SUMO2
CHOLESTEROL_BIOSYNTHESIS	CHOLESTEROL_BIOSYNTHESIS	25	-0.712016	-1.90493	0.000218643	0.00208055	0.00143174	1546	tags=64%, list=9%, signal=58%	GGPS1/NSDHL/ARV1/IDI1/CYP51A1/LSS/MSMO1/DHCR7/ACAT2/DHCR24/LBR/SQLE/FDFT1/HMGCR/HMGCS1/FDPS
POSTMITOTIC_NUCLEAR_PORE_COMPLEX_NPC_REFORMATION	POSTMITOTIC_NUCLEAR_PORE_COMPLEX_NPC_REFORMATION	27	-0.715097	-1.95117	0.00022085	0.00208055	0.00143174	1884	tags=70%, list=12%, signal=62%	NUP43/NUP155/NUP133/UBE2I/NUP35/NUP188/NUP160/NUP37/SUMO1/NUP107/NUP85/NUP205/SEH1L/NDC1/TNPO1/RCC1/NUP62/KPNB1/RAN
RHO_GTPASES_ACTIVATE_FORMINS	RHO_GTPASES_ACTIVATE_FORMINS	134	-0.484071	-1.6893	0.000225726	0.00210973	0.00145183	2144	tags=35%, list=13%, signal=31%	NUP43/ACTG1/CDC20/KIF2A/NUP133/PPP2R1B/CLASP1/PPP2R5E/DYNLL1/DIAPH2/RPS27/PMF1/CLASP2/SPC24/BIRC5/NUP160/TUBB4A/PPP2CA/CENPF/NUP37/TUBB2A/RAC1/PLK1/DYNC1I2/NUP107/NUP85/CKAP5/EVL/BUB1B/ACTB/SEH1L/DIAPH3/PPP2R1A/KNTC1/RHOA/FMNL2/PFN1/RCC2/AURKB/MAPRE1/XPO1/MAD2L1/PFN2/CENPH/TUBB2B/TUBA1A/TUBA1B
BETA_CATENIN_INDEPENDENT_WNT_SIGNALING	BETA_CATENIN_INDEPENDENT_WNT_SIGNALING	139	-0.474304	-1.66327	0.000229384	0.00212718	0.00146383	3820	tags=40%, list=23%, signal=31%	PSMC2/PSMD1/SEM1/PSMA2/PSMD14/PSME1/FZD4/GNG10/TNRC6A/ROR2/AP2B1/TCF7L2/PSMB7/PSME4/CLTA/PSMA5/PSMD7/PSMB5/PSMB4/PPP3CA/PSMA6/TCF7/PSMA3/PSMA4/PRICKLE1/GNB1/PSMB6/GNB3/PSMC3/AP2S1/PSMD11/PSMC4/FZD3/GNG12/PSMD3/MOV10/UBA52/ROR1/RAC1/PSMD4/CALM1/PSMA7/UBC/PSMB2/RYK/RHOA/GNG5/GNB4/PSME3/AGO2/PFN1/GNAO1/RPS27A/RAC3/GNG4
DEGRADATION_OF_DVL	DEGRADATION_OF_DVL	54	-0.602125	-1.84378	0.000236776	0.00217871	0.00149929	4033	tags=57%, list=25%, signal=43%	PSMF1/PSMB1/PSMC2/PSMD1/SEM1/PSMA2/PSMD14/PSME1/PSMB7/PSME4/PSMA5/PSMD7/PSMB5/PSMB4/PSMA6/PSMA3/PSMA4/PSMB6/PSMC3/RBX1/PSMD11/PSMC4/DACT1/PSMD3/UBA52/PSMD4/PSMA7/UBC/PSMB2/PSME3/RPS27A
RMTS_METHYLATE_HISTONE_ARGININES	RMTS_METHYLATE_HISTONE_ARGININES	30	-0.687135	-1.90604	0.000263942	0.00240999	0.00165845	2671	tags=63%, list=16%, signal=53%	WDR5/COPRS/ACTL6A/CCND1/SMARCA2/SMARCE1/PRMT6/RBBP7/SMARCC2/SMARCD1/SMARCD2/PBRM1/WDR77/RPS2/CDK4/CARM1/PRMT1/SMARCC1/SMARCA4
PCP_CE_PATHWAY	PCP_CE_PATHWAY	87	-0.52877	-1.75322	0.000267664	0.00242532	0.001669	4033	tags=48%, list=25%, signal=37%	PSMF1/PSMB1/PSMC2/PSMD1/SEM1/PSMA2/PSMD14/PSME1/FZD4/ROR2/AP2B1/PSMB7/PSME4/CLTA/PSMA5/PSMD7/PSMB5/PSMB4/PSMA6/PSMA3/PSMA4/PRICKLE1/PSMB6/PSMC3/AP2S1/PSMD11/PSMC4/FZD3/PSMD3/UBA52/ROR1/RAC1/PSMD4/PSMA7/UBC/PSMB2/RYK/RHOA/PSME3/PFN1/RPS27A/RAC3
CELLULAR_RESPONSE_TO_HYPOXIA	CELLULAR_RESPONSE_TO_HYPOXIA	72	-0.556291	-1.77797	0.00027362	0.00246051	0.00169322	4365	tags=56%, list=27%, signal=41%	WTIP/PSMD9/EGLN2/PSMF1/PSMB1/PSMC2/PSMD1/SEM1/PSMA2/PSMD14/PSME1/AJUBA/PSMB7/HIF1A/PSME4/PSMA5/PSMD7/PSMB5/PSMB4/PSMA6/PSMA3/PSMA4/PSMB6/PSMC3/RBX1/PSMD11/UBE2D3/PSMC4/PSMD3/UBA52/UBE2D2/EGLN1/PSMD4/ARNT/PSMA7/UBC/PSMB2/PSME3/VEGFA/RPS27A
PROCESSIVE_SYNTHESIS_ON_THE_LAGGING_STRAND	PROCESSIVE_SYNTHESIS_ON_THE_LAGGING_STRAND	15	-0.803649	-1.89777	0.000288955	0.00257887	0.00177466	1622	tags=67%, list=10%, signal=60%	RPA1/PRIM1/LIG1/POLD3/FEN1/POLD1/DNA2/POLD2/PCNA/POLA1
PYRUVATE_METABOLISM_AND_CITRIC_ACID_TCA_CYCLE	PYRUVATE_METABOLISM_AND_CITRIC_ACID_TCA_CYCLE	52	-0.597697	-1.82178	0.000291548	0.00258259	0.00177723	3192	tags=48%, list=20%, signal=39%	MPC1/SDHA/DLAT/SUCLG2/ME3/NNT/DLST/PDP2/DLD/ACO2/SUCLG1/PDHB/GLO1/FH/GSTZ1/PDHA1/SLC16A1/CS/MDH2/ME2/IDH2/VDAC1/LDHB/LDHA/PDK1
TRANSPORT_OF_MATURE_MRNAS_DERIVED_FROM_INTRONLESS_TRANSCRIPTS	TRANSPORT_OF_MATURE_MRNAS_DERIVED_FROM_INTRONLESS_TRANSCRIPTS	42	-0.617958	-1.81441	0.000306065	0.00269111	0.0018519	3070	tags=67%, list=19%, signal=54%	NUP43/NUP155/NUP133/CPSF4/ALYREF/EIF4E/TPR/CPSF3/NUP35/NUP214/NUP188/NUP160/WDR33/NUP37/NUP153/NUP107/NUP85/NUP205/AAAS/CPSF2/SEH1L/NDC1/NUP210/NCBP2/NUP62/NUP88/SLBP/SYMPK
INTERLEUKIN_6_SIGNALING	INTERLEUKIN_6_SIGNALING	10	0.846589	1.9314	0.000337143	0.00294256	0.00202494	987	tags=60%, list=6%, signal=56%	STAT3/JAK1/STAT1/TYK2/IL6ST/JAK2
SIGNALING_BY_NUCLEAR_RECEPTORS	SIGNALING_BY_NUCLEAR_RECEPTORS	214	-0.422534	-1.55453	0.000349791	0.00303068	0.00208558	2382	tags=26%, list=15%, signal=23%	DLD/ELK1/PLTP/NCOR2/KAT5/CCND1/STAG2/GNB1/GNB3/KDM1B/PPID/GNG12/AKT1/MMP2/MOV10/PDHB/CREB1/GNAI1/FABP6/GREB1/JUND/FABP5/HDAC3/GPAM/NRAS/SMC3/CALM1/SP1/TBL1XR1/TBL1X/PDHA1/BCL2/IGF1R/EGFR/SMC1A/PIK3R1/GNG5/GNB4/AGO2/PTGES3/KPNA2/FKBP5/XPO1/SREBF1/PTK2/GNG4/HSP90AA1/PIK3R3/CARM1/PRMT1/FKBP4/KDM1A/HSP90AB1/SCD/PDK1/FASN
EXPORT_OF_VIRAL_RIBONUCLEOPROTEINS_FROM_NUCLEUS	EXPORT_OF_VIRAL_RIBONUCLEOPROTEINS_FROM_NUCLEUS	31	-0.66587	-1.8608	0.000374188	0.00321856	0.00221487	1912	tags=58%, list=12%, signal=51%	TPR/NUP35/NUP214/NUP188/NUP160/NUP37/NUP153/NUP107/NUP85/NUP205/AAAS/SEH1L/NDC1/NUP210/NUP62/NUP88/RAN/XPO1
MITOTIC_PROMETAPHASE	MITOTIC_PROMETAPHASE	196	-0.429978	-1.56787	0.000389256	0.00330033	0.00227115	3154	tags=36%, list=19%, signal=29%	ACTR1A/CEP290/NUP43/CDC20/KIF2A/NUP133/HAUS4/PPP2R1B/TUBGCP3/CLASP1/PPP2R5E/DYNLL1/CDK1/HAUS6/PLK4/CEP57/RPS27/CETN2/PMF1/STAG2/CLASP2/HAUS8/SPC24/TUBGCP2/NCAPG/ALMS1/DCTN2/BIRC5/NUP160/TUBB4A/MZT2A/CSNK1E/PPP2CA/CENPF/NUP37/TUBB2A/PLK1/CENPJ/DYNC1I2/CDK5RAP2/HAUS1/SMC3/PDS5B/NUP107/CEP152/NUP85/CKAP5/BUB1B/TUBG1/CSNK2A1/SEH1L/YWHAG/PDS5A/PPP2R1A/SMC1A/KNTC1/MZT2B/NCAPD2/CEP78/RCC2/NCAPH/AURKB/MA…
SIGNALING_BY_THE_B_CELL_RECEPTOR_BCR	SIGNALING_BY_THE_B_CELL_RECEPTOR_BCR	105	-0.490697	-1.67094	0.000388942	0.00330033	0.00227115	4033	tags=43%, list=25%, signal=32%	PSMF1/PSMB1/RASGRP1/LYN/PSMC2/PSMD1/SEM1/PSMA2/PSMD14/PSME1/SKP1/PSMB7/PSME4/SOS1/NFKB1/PSMA5/PSMD7/PSMB5/PSMB4/PPP3CA/PSMA6/PSMA3/PSMA4/NFATC3/PSMB6/SH3KBP1/FYN/PSMC3/PSMD11/PSMC4/PSMD3/UBA52/PSMD4/NRAS/CALM1/PSMA7/AHCYL1/CUL1/UBC/PSMB2/FKBP1A/PIK3R1/PSME3/RPS27A/PPIA
METABOLISM_OF_POLYAMINES	METABOLISM_OF_POLYAMINES	56	-0.575399	-1.76995	0.00040539	0.00340881	0.0023458	4033	tags=54%, list=25%, signal=40%	PSMF1/PSMB1/PSMC2/PSMD1/SEM1/PSMA2/PSMD14/PSME1/PSMB7/PSME4/PSMA5/PSMD7/PSMB5/PSMB4/PSMA6/PSMA3/PSMA4/PSMB6/PSMC3/PSMD11/PSMC4/PSMD3/PSMD4/PSMA7/PSMB2/AMD1/PSME3/SRM/SMS/ODC1
G0_AND_EARLY_G1	G0_AND_EARLY_G1	27	-0.703198	-1.91871	0.000407794	0.00340881	0.0023458	1874	tags=59%, list=11%, signal=53%	CCNE2/CDK1/MAX/CCNE1/E2F5/TFDP1/TFDP2/CCNA2/E2F1/CDK2/CDC25A/TOP2A/CDC6/RBBP4/PCNA/MYBL2
SUMOYLATION_OF_RNA_BINDING_PROTEINS	SUMOYLATION_OF_RNA_BINDING_PROTEINS	45	-0.608335	-1.81638	0.000415006	0.00344484	0.00237059	3070	tags=64%, list=19%, signal=52%	NUP43/NUP155/NOP58/NUP133/RNF2/PHC2/SCMH1/TPR/UBE2I/NUP35/NUP214/NUP188/NUP160/NUP37/SUMO1/NUP153/NUP107/NUP85/NUP205/AAAS/SEH1L/NDC1/NUP210/NUP62/NUP88/HNRNPK/CBX2/SUMO2/HNRNPC
CRISTAE_FORMATION	CRISTAE_FORMATION	28	-0.689017	-1.88517	0.00043635	0.00359686	0.0024752	4140	tags=75%, list=25%, signal=56%	TMEM11/MTX2/ATP5ME/ATP5F1E/MT-ATP8/ATP5MG/ATP5PB/ATP5F1C/CHCHD3/ATP5MF/ATP5PO/ATP5F1B/ATP5F1D/ATP5MC3/HSPA9/APOO/CHCHD6/ATP5MC1/IMMT/ATP5F1A/ATP5MC2
INTERLEUKIN_6_FAMILY_SIGNALING	INTERLEUKIN_6_FAMILY_SIGNALING	22	0.683353	1.95059	0.000445289	0.00362026	0.00249131	1867	tags=41%, list=11%, signal=36%	STAT3/JAK1/STAT1/TYK2/LIFR/IL6ST/JAK2/IL11/OSMR
CS_DS_DEGRADATION	CS_DS_DEGRADATION	14	0.770516	1.9175	0.000442367	0.00362026	0.00249131	1100	tags=43%, list=7%, signal=40%	IDS/ARSB/IDUA/VCAN/NCAN/BCAN
EXTRACELLULAR_MATRIX_ORGANIZATION	EXTRACELLULAR_MATRIX_ORGANIZATION	267	0.344955	1.4905	0.000456713	0.00368788	0.00253784	1700	tags=18%, list=10%, signal=16%	TIMP2/ADAMTS9/LAMB2/LAMA5/LTBP3/THBS1/CTSV/ITGAV/PLEC/EFEMP2/ITGA3/ITGA6/AGRN/COL6A2/COL6A1/COL6A6/FBN1/TNR/CAPN10/COL7A1/CAPN1/COL5A1/VCAN/NCAN/PXDN/ITGA7/CASP3/CD47/BCAN/COL11A1/EMILIN2/MFAP3/ITGA1/SPARC/COL4A1/CTSB/ICAM3/COL3A1/CAPN5/LAMA3/COL5A2/SDC4/ITGA2B/ADAM12/PHYKPL/ITGA2/COL16A1
POLYMERASE_SWITCHING	POLYMERASE_SWITCHING	14	-0.785193	-1.81937	0.000468542	0.00375784	0.00258598	2870	tags=86%, list=18%, signal=71%	POLA2/PRIM2/RFC2/RFC4/RFC3/RFC1/PRIM1/POLD3/POLD1/POLD2/PCNA/POLA1
INTERLEUKIN_27_SIGNALING	INTERLEUKIN_27_SIGNALING	10	0.839477	1.91517	0.000479672	0.00379581	0.00261211	987	tags=60%, list=6%, signal=56%	STAT3/JAK1/STAT1/TYK2/IL6ST/JAK2
FORMATION_OF_INCISION_COMPLEX_IN_GG_NER	FORMATION_OF_INCISION_COMPLEX_IN_GG_NER	42	-0.606645	-1.78119	0.000478454	0.00379581	0.00261211	2264	tags=45%, list=14%, signal=39%	UBE2N/CETN2/UBE2V2/RBX1/UBE2I/RPA1/UBA52/SUMO1/CUL4A/DDB1/SUMO3/PARP2/UBC/CHD1L/PARP1/RAD23A/RAD23B/RPS27A/SUMO2
HSP90_CHAPERONE_CYCLE_FOR_STEROID_HORMONE_RECEPTORS_SHR_IN_THE_PRESENCE_OF_LIGAND	HSP90_CHAPERONE_CYCLE_FOR_STEROID_HORMONE_RECEPTORS_SHR_IN_THE_PRESENCE_OF_LIGAND	49	-0.594852	-1.78792	0.000488987	0.00384389	0.0026452	1806	tags=31%, list=11%, signal=27%	DCTN2/TUBB4A/TUBB2A/DYNC1I2/DCTN6/PTGES3/STIP1/FKBP5/HSPA8/HSP90AA1/TUBB2B/FKBP4/TUBA1A/TUBA1B/HSP90AB1
NUCLEOTIDE_EXCISION_REPAIR	NUCLEOTIDE_EXCISION_REPAIR	109	-0.483319	-1.65029	0.000496887	0.0038803	0.00267025	2318	tags=37%, list=14%, signal=32%	RFC2/UBE2N/ACTL6A/RFC4/CETN2/MCRS1/UBE2V2/RBX1/UBE2I/RFC3/RFC1/INO80E/RPA1/UBA52/POLE3/SUMO1/CUL4A/DDB1/PRPF19/POLE2/TCEA1/SUMO3/PARP2/ACTB/USP7/RUVBL1/UBC/LIG1/CHD1L/POLD3/PARP1/RAD23A/RAD23B/POLD1/HMGN1/LIG3/RPS27A/POLD2/PCNA/SUMO2
G2_M_DNA_DAMAGE_CHECKPOINT	G2_M_DNA_DAMAGE_CHECKPOINT	61	-0.5673	-1.79513	0.000513168	0.00398124	0.00273972	2449	tags=44%, list=15%, signal=38%	CDK1/ATR/RFC2/RMI1/UBE2N/RFC4/KAT5/ABRAXAS1/UBE2V2/WRN/RFC3/RPA1/BLM/CHEK1/SUMO1/RHNO1/NBN/WEE1/CHEK2/RMI2/YWHAH/EXO1/YWHAQ/RBBP8/YWHAG/DNA2/NSD2
RUNX1_REGULATES_TRANSCRIPTION_OF_GENES_INVOLVED_IN_DIFFERENTIATION_OF_HSCS	RUNX1_REGULATES_TRANSCRIPTION_OF_GENES_INVOLVED_IN_DIFFERENTIATION_OF_HSCS	67	-0.549087	-1.75383	0.000523288	0.00403339	0.00277561	4033	tags=54%, list=25%, signal=41%	PSMF1/PSMB1/PSMC2/PSMD1/SEM1/PSMA2/TAL1/PSMD14/PSME1/MYB/PSMB7/PSME4/LDB1/PSMA5/PSMD7/PSMB5/PSMB4/PSMA6/PSMA3/PSMA4/PSMB6/PSMC3/TCF12/PSMD11/PSMC4/PSMD3/UBA52/PSMD4/PSMA7/LMO1/UBC/PSMB2/ABL1/PSME3/RPS27A/TCF3
METHYLATION	METHYLATION	12	-0.805038	-1.80905	0.000536877	0.00411144	0.00282932	1225	tags=67%, list=8%, signal=62%	N6AMT1/TRMT112/GSTO1/COMT/MAT2B/MTR/MAT2A/AHCY
DISEASES_OF_DNA_REPAIR	DISEASES_OF_DNA_REPAIR	34	-0.635289	-1.80605	0.000542351	0.00412673	0.00283984	3018	tags=59%, list=18%, signal=48%	NEIL3/RAD51B/BRIP1/MRE11/RAD51AP1/XRCC2/RAD51/RMI1/KAT5/WRN/BLM/MSH2/NBN/RMI2/EXO1/RBBP8/MLH1/NTHL1/DNA2/MSH6
TRANSCRIPTION_OF_E2F_TARGETS_UNDER_NEGATIVE_CONTROL_BY_DREAM_COMPLEX	TRANSCRIPTION_OF_E2F_TARGETS_UNDER_NEGATIVE_CONTROL_BY_DREAM_COMPLEX	19	-0.745023	-1.86957	0.000551181	0.00416721	0.00286769	1874	tags=53%, list=11%, signal=47%	MAX/E2F5/TFDP1/TFDP2/E2F1/CDC25A/TOP2A/CDC6/RBBP4/PCNA
SIGNALING_BY_NOTCH4	SIGNALING_BY_NOTCH4	77	-0.520742	-1.6889	0.000565284	0.00424679	0.00292245	4033	tags=53%, list=25%, signal=40%	PSMF1/PSMB1/PSMC2/PSMD1/SEM1/PSMA2/PSMD14/PSME1/SKP1/PSMB7/PSMA5/PSMD7/MAML2/PSMB5/PSMB4/RBPJ/PSMA6/PSMA3/PSMA4/APH1A/PSMB6/PSMC3/NOTCH2/RBX1/PSMD11/PSMC4/AKT1/PSMD3/UBA52/FBXW7/PSMD4/SNW1/PSMA7/MAML3/CUL1/UBC/PSMB2/KAT2A/PSME3/RPS27A/SMAD3
ASSEMBLY_OF_COLLAGEN_FIBRILS_AND_OTHER_MULTIMERIC_STRUCTURES	ASSEMBLY_OF_COLLAGEN_FIBRILS_AND_OTHER_MULTIMERIC_STRUCTURES	55	0.51972	1.78819	0.000570571	0.0042565	0.00292914	2427	tags=33%, list=15%, signal=28%	CTSV/PLEC/ITGA6/COL6A2/COL6A1/COL6A6/COL7A1/COL5A1/PXDN/COL11A1/COL4A1/CTSB/COL3A1/LAMA3/COL5A2/LOXL4/MMP3/LAMB3
TRANSCRIPTIONAL_REGULATION_BY_E2F6	TRANSCRIPTIONAL_REGULATION_BY_E2F6	32	-0.658142	-1.84835	0.00057375	0.0042565	0.00292914	2002	tags=50%, list=12%, signal=44%	SUZ12/MAX/E2F6/EZH2/RBBP7/EHMT1/CHEK1/MGA/TFDP1/TFDP2/RBBP8/E2F1/CBX3/CBX5/RBBP4/RRM2
MITOCHONDRIAL_BIOGENESIS	MITOCHONDRIAL_BIOGENESIS	89	-0.508226	-1.68656	0.000583071	0.00429879	0.00295824	4140	tags=56%, list=25%, signal=42%	TMEM11/MTX2/TGS1/ATP5ME/GABPA/ATP5F1E/POLG2/NRF1/SSBP1/PRKAB2/TWNK/MAPK14/NCOA6/GABPB1/PRKAG2/MT-ATP8/ATP5MG/ATP5PB/CRTC3/PRKAA2/PRKAG1/ATP5F1C/CHCHD3/ATP5MF/ATP5PO/ATP5F1B/CREB1/ATP5F1D/ATP5MC3/HCFC1/HDAC3/POLRMT/SOD2/ACSS2/HSPA9/PPARGC1B/CALM1/APOO/CHCHD6/ATP5MC1/TBL1XR1/TBL1X/IMMT/ATP5F1A/CAMK4/ATP5MC2/GLUD1/IDH2/PPRC1/CARM1
TCF_DEPENDENT_SIGNALING_IN_RESPONSE_TO_WNT	TCF_DEPENDENT_SIGNALING_IN_RESPONSE_TO_WNT	158	-0.443547	-1.57513	0.000596136	0.00436798	0.00300586	3820	tags=41%, list=23%, signal=32%	PSMC2/PSMD1/SEM1/DKK1/PSMA2/PSMD14/CXXC4/PSME1/FZD4/GSK3B/AXIN1/TCF4/CBY1/TCF7L2/PSMB7/PSME4/KREMEN2/PPP2R1B/PSMA5/PSMD7/PPP2R5E/PSMB5/PSMB4/RNF146/PSMA6/TCF7/PSMA3/KAT5/PYGO2/PSMA4/PSMB6/PSMC3/RBX1/PSMD11/TERT/PSMC4/AKT1/DACT1/PSMD3/UBA52/CSNK1E/PPP2CA/LRP5/PSMD4/ZNRF3/SOX13/CTBP1/PYGO1/TLE1/PSMA7/RUVBL1/UBC/BCL9/PSMB2/CSNK2A1/RYK/LEO1/SOX4/AMER1/PPP2R1A/CCDC88C/PSME3/XPO1/RPS27A/SMARCA4
DNA_DAMAGE_BYPASS	DNA_DAMAGE_BYPASS	47	-0.593785	-1.78114	0.000607028	0.00442051	0.003042	2318	tags=49%, list=14%, signal=42%	RFC2/RFC4/RAD18/RBX1/RFC3/RFC1/RPA1/UBA52/POLE3/CUL4A/DDB1/PCLAF/UFD1/VCP/POLE2/USP1/UBC/POLD3/POLD1/DTL/RPS27A/POLD2/PCNA
RNA_POLYMERASE_II_TRANSCRIPTION_TERMINATION	RNA_POLYMERASE_II_TRANSCRIPTION_TERMINATION	65	-0.550862	-1.75451	0.000653987	0.00473343	0.00325734	2907	tags=51%, list=18%, signal=42%	CSTF2T/SRSF4/MAGOHB/NUDT21/CPSF4/THOC6/THOC2/SRSF9/ALYREF/MAGOH/CHTOP/SNRPG/THOC5/THOC3/SRSF6/CPSF3/SNRPE/PABPN1/WDR33/SRSF11/RNPS1/CSTF3/SRSF7/CPSF2/PAPOLA/NCBP2/SNRPF/SRSF3/SNRPB/SLBP/SYMPK/SRSF1/SRSF2
ASYMMETRIC_LOCALIZATION_OF_PCP_PROTEINS	ASYMMETRIC_LOCALIZATION_OF_PCP_PROTEINS	61	-0.56232	-1.77937	0.00069435	0.00499511	0.00343742	4033	tags=52%, list=25%, signal=40%	PSMF1/PSMB1/PSMC2/PSMD1/SEM1/PSMA2/PSMD14/PSME1/FZD4/PSMB7/PSME4/PSMA5/PSMD7/PSMB5/PSMB4/PSMA6/PSMA3/PSMA4/PRICKLE1/PSMB6/PSMC3/PSMD11/PSMC4/FZD3/PSMD3/UBA52/PSMD4/PSMA7/UBC/PSMB2/PSME3/RPS27A
SUMOYLATION_OF_DNA_DAMAGE_RESPONSE_AND_REPAIR_PROTEINS	SUMOYLATION_OF_DNA_DAMAGE_RESPONSE_AND_REPAIR_PROTEINS	75	-0.52305	-1.68399	0.000702665	0.00502448	0.00345763	2145	tags=43%, list=13%, signal=37%	SCMH1/CETN2/STAG2/PIAS2/TPR/UBE2I/NUP35/NUP214/WRN/NUP188/NUP160/RPA1/BLM/NUP37/SUMO1/NUP153/SMC3/NUP107/NUP85/NUP205/SUMO3/AAAS/TDG/SEH1L/NDC1/NUP210/NUP62/PARP1/SMC1A/NUP88/CBX2/SUMO2
PROCESSIVE_SYNTHESIS_ON_THE_C_STRAND_OF_THE_TELOMERE	PROCESSIVE_SYNTHESIS_ON_THE_C_STRAND_OF_THE_TELOMERE	19	-0.739631	-1.85604	0.00074124	0.00526858	0.00362561	1795	tags=53%, list=11%, signal=47%	WRN/RPA1/BLM/LIG1/POLD3/FEN1/POLD1/DNA2/POLD2/PCNA
HIV_LIFE_CYCLE	HIV_LIFE_CYCLE	145	-0.444904	-1.56933	0.000815074	0.00575889	0.00396302	2158	tags=30%, list=13%, signal=26%	MVB12B/NMT1/TAF4B/TPR/VPS28/NUP35/NUP214/NUP188/NUP160/UBA52/CHMP3/NUP37/PSIP1/NEDD4L/NUP153/NELFA/NUP107/XRCC6/NUP85/TCEA1/NUP205/AAAS/BANF1/UBC/SEH1L/LIG1/NDC1/NUP210/RCC1/NCBP2/NUP62/RNMT/FEN1/RANBP1/NUP88/SUPT16H/RAN/XPO1/RPS27A/SSRP1/XRCC5/PPIA/HMGA1
INTEGRIN_CELL_SURFACE_INTERACTIONS	INTEGRIN_CELL_SURFACE_INTERACTIONS	76	0.464389	1.7052	0.000863588	0.00606555	0.00417405	1700	tags=28%, list=10%, signal=25%	THBS1/ITGAV/ITGA3/ITGA6/AGRN/COL6A2/COL6A1/COL6A6/FBN1/COL7A1/COL5A1/ITGA7/CD47/ITGA1/COL4A1/ICAM3/COL3A1/COL5A2/ITGA2B/ITGA2/COL16A1
REGULATION_OF_RAS_BY_GAPS	REGULATION_OF_RAS_BY_GAPS	64	-0.532202	-1.68615	0.000892644	0.00623275	0.00428911	4033	tags=50%, list=25%, signal=38%	PSMF1/PSMB1/PSMC2/PSMD1/SEM1/PSMA2/PSMD14/PSME1/PSMB7/PSME4/PSMA5/PSMD7/PSMB5/PSMB4/PSMA6/PSMA3/PSMA4/PSMB6/PSMC3/RBX1/PSMD11/PSMC4/PSMD3/UBA52/PSMD4/NRAS/PSMA7/RASA1/UBC/PSMB2/PSME3/RPS27A
POST_CHAPERONIN_TUBULIN_FOLDING_PATHWAY	POST_CHAPERONIN_TUBULIN_FOLDING_PATHWAY	20	-0.716988	-1.8202	0.000905967	0.00628879	0.00432767	1612	tags=40%, list=10%, signal=36%	TUBB4A/TUBB2A/TBCA/TBCD/ARL2/TUBB2B/TUBA1A/TUBA1B
COOPERATION_OF_PDCL_PHLP1_AND_TRIC_CCT_IN_G_PROTEIN_BETA_FOLDING	COOPERATION_OF_PDCL_PHLP1_AND_TRIC_CCT_IN_G_PROTEIN_BETA_FOLDING	36	-0.617429	-1.77467	0.000997151	0.0068815	0.00473555	2067	tags=39%, list=13%, signal=34%	GNB1/GNB3/GNG12/TCP1/CCT4/CSNK2A1/CCT2/GNG5/GNB4/CCT7/CCT6A/CCT5/CCT3/GNG4
CROSS_PRESENTATION_OF_SOLUBLE_EXOGENOUS_ANTIGENS_ENDOSOMES	CROSS_PRESENTATION_OF_SOLUBLE_EXOGENOUS_ANTIGENS_ENDOSOMES	47	-0.580644	-1.74172	0.00109311	0.00750013	0.00516127	4033	tags=55%, list=25%, signal=42%	PSMF1/PSMB1/PSMC2/PSMD1/SEM1/PSMA2/PSMD14/PSME1/PSMB7/PSME4/PSMA5/PSMD7/PSMB5/PSMB4/PSMA6/PSMA3/PSMA4/PSMB6/PSMC3/PSMD11/PSMC4/PSMD3/PSMD4/PSMA7/PSMB2/PSME3
DOWNREGULATION_OF_SMAD2_3_SMAD4_TRANSCRIPTIONAL_ACTIVITY	DOWNREGULATION_OF_SMAD2_3_SMAD4_TRANSCRIPTIONAL_ACTIVITY	27	-0.679016	-1.85272	0.00110974	0.00757045	0.00520966	2822	tags=48%, list=17%, signal=40%	SMAD2/TGIF1/NCOR2/UBE2D3/UBA52/PPM1A/NEDD4L/SNW1/UBC/PARP1/TGIF2/RPS27A/SMAD3
DNA_DOUBLE_STRAND_BREAK_RESPONSE	DNA_DOUBLE_STRAND_BREAK_RESPONSE	43	-0.58669	-1.72494	0.00119678	0.00811755	0.00558615	2264	tags=37%, list=14%, signal=32%	UBE2N/KAT5/ABRAXAS1/UBE2V2/UBXN1/UBE2I/UBA52/SUMO1/NBN/CHEK2/UBC/ABL1/BAZ1B/KPNA2/RPS27A/NSD2
SIGNALING_BY_TGF_BETA_RECEPTOR_COMPLEX	SIGNALING_BY_TGF_BETA_RECEPTOR_COMPLEX	74	-0.523376	-1.67909	0.00122375	0.00825339	0.00567962	1613	tags=36%, list=10%, signal=33%	SMAD2/UCHL5/TGIF1/NCOR2/UBE2D3/UBA52/CDK8/E2F5/PARD3/MTMR4/PPM1A/NEDD4L/SNW1/TFDP1/SP1/PMEPA1/ZFYVE9/TFDP2/UBC/FKBP1A/PARP1/PPP1CB/RHOA/TGIF2/XPO1/RPS27A/SMAD3
AGGREPHAGY	AGGREPHAGY	39	-0.611873	-1.78017	0.00128178	0.00859592	0.00591534	2637	tags=36%, list=16%, signal=30%	PARK7/DYNLL1/UBE2N/UBA52/TUBB4A/TUBB2A/DYNC1I2/VCP/UBC/RPS27A/HSP90AA1/TUBB2B/TUBA1A/TUBA1B
GLUTATHIONE_CONJUGATION	GLUTATHIONE_CONJUGATION	29	-0.639527	-1.7563	0.00135084	0.00900815	0.00619902	1235	tags=55%, list=8%, signal=51%	GSTM4/MGST3/GCLC/GCLM/MGST1/GSTM1/CHAC1/GSTO1/GSTP1/GSTZ1/CNDP2/GGCT/GSTA4/GSS/ESD/AKR1A1
DEADENYLATION_OF_MRNA	DEADENYLATION_OF_MRNA	25	-0.669894	-1.79223	0.00136498	0.00905159	0.00622891	2507	tags=48%, list=15%, signal=41%	CNOT2/EIF4E/CNOT7/PAIP1/CNOT1/EIF4B/CNOT10/TUT4/EIF4G1/CNOT9/TNKS1BP1/PABPC1
FCERI_MEDIATED_NF_KB_ACTIVATION	FCERI_MEDIATED_NF_KB_ACTIVATION	74	-0.519363	-1.66621	0.00139967	0.00923007	0.00635173	4033	tags=53%, list=25%, signal=40%	PSMF1/PSMB1/RASGRP1/LYN/PSMC2/PSMD1/SEM1/PSMA2/PSMD14/PSME1/UBE2V1/SKP1/PSMB7/PSME4/NFKB1/PSMA5/PSMD7/PSMB5/PSMB4/PSMA6/PSMA3/UBE2N/PSMA4/CDC34/PSMB6/PSMC3/PSMD11/PSMC4/TAB1/PSMD3/UBA52/UBE2D2/PSMD4/PSMA7/CUL1/UBC/PSMB2/PSME3/RPS27A
INHIBITION_OF_REPLICATION_INITIATION_OF_DAMAGED_DNA_BY_RB1_E2F1	INHIBITION_OF_REPLICATION_INITIATION_OF_DAMAGED_DNA_BY_RB1_E2F1	12	-0.777502	-1.74717	0.00150437	0.00986569	0.00678914	2870	tags=83%, list=18%, signal=69%	POLA2/PRIM2/PPP2R1B/PPP2CA/PRIM1/TFDP1/TFDP2/PPP2R1A/E2F1/POLA1
FOLDING_OF_ACTIN_BY_CCT_TRIC	FOLDING_OF_ACTIN_BY_CCT_TRIC	10	-0.829357	-1.80787	0.0015358	0.0100164	0.00689288	1727	tags=80%, list=11%, signal=72%	TCP1/CCT4/ACTB/CCT2/CCT7/CCT6A/CCT5/CCT3
CHAPERONE_MEDIATED_AUTOPHAGY	CHAPERONE_MEDIATED_AUTOPHAGY	21	-0.698999	-1.81119	0.00155826	0.0101074	0.00695546	1613	tags=33%, list=10%, signal=30%	UBA52/UBC/HSPA8/EEF1A1/RPS27A/HSP90AA1/HSP90AB1
INTERLEUKIN_10_SIGNALING	INTERLEUKIN_10_SIGNALING	24	0.634675	1.83823	0.00158445	0.0101115	0.00695832	368	tags=12%, list=2%, signal=12%	STAT3/JAK1/TYK2
MAPK6_MAPK4_SIGNALING	MAPK6_MAPK4_SIGNALING	85	-0.483958	-1.60395	0.00157906	0.0101115	0.00695832	4183	tags=52%, list=26%, signal=39%	AGO1/TNRC6B/PSMF1/PSMB1/PSMC2/PSMD1/SEM1/PSMA2/PSMD14/DNAJB1/PSME1/PAK1/TNRC6A/PSMB7/ETV4/PSME4/PSMA5/PSMD7/PSMB5/PSMB4/PSMA6/CDK1/PSMA3/PSMA4/PSMB6/PSMC3/PSMD11/PSMC4/PSMD3/MMP2/MOV10/UBA52/RAC1/PSMD4/PAK2/PSMA7/UBC/PSMB2/PSME3/AGO2/XPO1/RPS27A/MAPK6/IGF2BP1
NR1H2_AND_NR1H3_MEDIATED_SIGNALING	NR1H2_AND_NR1H3_MEDIATED_SIGNALING	42	-0.580287	-1.7038	0.001584	0.0101115	0.00695832	2344	tags=31%, list=14%, signal=27%	PLTP/NCOR2/KDM1B/MOV10/FABP6/HDAC3/TBL1XR1/TBL1X/AGO2/SREBF1/KDM1A/SCD/FASN
PROTEIN_LOCALIZATION	PROTEIN_LOCALIZATION	152	-0.42885	-1.52411	0.00173723	0.0110272	0.00758847	4128	tags=45%, list=25%, signal=34%	CHCHD5/MTX2/SLC27A2/TOMM40/IDE/SCP2/TIMM23/FXN/IDH3G/CYC1/TIMM10/PEX7/COA6/PEX6/DNAJC19/GRPEL1/AGPS/LONP2/PEX13/CAT/GRPEL2/ABCD3/SEC61G/TIMM50/TIMM8A/NDUFB8/TOMM22/TOMM70/VAPA/CHCHD4/PMPCB/ACO2/CHCHD3/TOMM7/TYSND1/PEX5/TIMM9/TIMM13/PEX2/PECR/COQ2/TOMM5/UBE2D3/COA4/CAMLG/TIMM17B/ATP5F1B/UBA52/UBE2D2/UBL4A/SERP1/CYB5A/HACL1/APP/HSPA9/PEX26/ATP5MC1/CHCHD2/UBC/GNPAT/ATP5F1A/HSD17B4/CS/IDH1/SLC25A13/R…
TRANSCRIPTIONAL_REGULATION_BY_THE_AP_2_TFAP2_FAMILY_OF_TRANSCRIPTION_FACTORS	TRANSCRIPTIONAL_REGULATION_BY_THE_AP_2_TFAP2_FAMILY_OF_TRANSCRIPTION_FACTORS	33	-0.614948	-1.72616	0.00176955	0.0111726	0.00768851	1920	tags=39%, list=12%, signal=35%	KCTD15/UBE2I/ATAD2/YEATS4/SUMO1/KIT/EGFR/VEGFA/TFAP2B/DEK/HSPD1/NPM1/MYBL2
SIGNALING_BY_TGFB_FAMILY_MEMBERS	SIGNALING_BY_TGFB_FAMILY_MEMBERS	101	-0.469898	-1.59433	0.00184517	0.0115885	0.00797468	1613	tags=24%, list=10%, signal=22%	UBA52/CDK8/E2F5/PARD3/MTMR4/PPM1A/NEDD4L/SNW1/TFDP1/SP1/PMEPA1/SMAD6/ZFYVE9/TFDP2/UBC/FKBP1A/PARP1/PPP1CB/RHOA/TGIF2/XPO1/ACVR2B/RPS27A/SMAD3
CHROMOSOME_MAINTENANCE	CHROMOSOME_MAINTENANCE	92	-0.489844	-1.6333	0.00187631	0.011722	0.00806656	2870	tags=39%, list=18%, signal=32%	POLA2/PRIM2/TINF2/MIS18A/CENPX/CHTF8/GAR1/RFC2/RFC4/TERT/WRN/RFC3/RFC1/RPA1/BLM/RBBP7/PRIM1/NOP10/MIS18BP1/RUVBL1/LIG1/CCNA2/POLD3/FEN1/POLD1/DSCC1/CDK2/DNA2/DKC1/RBBP4/NHP2/POLD2/CENPH/PCNA/POLA1/NPM1
CYTOPROTECTION_BY_HMOX1	CYTOPROTECTION_BY_HMOX1	119	-0.449343	-1.54911	0.00193242	0.0120094	0.00826432	4301	tags=51%, list=26%, signal=38%	PSMD9/ABCC1/MT-CO3/COX4I1/COX14/TGS1/PSMF1/PSMB1/COX20/PSMC2/PSMD1/SEM1/PSMA2/PSMD14/BACH1/PSME1/SKP1/NCOA6/PSMB7/COX6A1/PSME4/COX8A/COX6B1/NDUFA4/PSMA5/PSMD7/PSMB5/PSMB4/PSMA6/COX18/PSMA3/NCOR2/COX6C/PSMA4/PSMB6/PSMC3/COX7B/BLVRA/RBX1/PSMD11/PSMC4/PSMD3/COX7C/UBA52/SIN3A/TXNIP/HDAC3/PSMD4/PSMA7/TBL1XR1/LRPPRC/CUL1/UBC/PSMB2/TBL1X/CSNK2A1/PSME3/COX5A/RPS27A/SKP2/CARM1
SARS_COV_INFECTIONS	SARS_COV_INFECTIONS	144	-0.435034	-1.53739	0.00194286	0.0120113	0.00826567	2236	tags=24%, list=14%, signal=21%	SAP30L/FXYD6/ST3GAL1/ZCRB1/RBX1/AP2S1/UBE2I/UBA52/CHMP3/RBBP7/ST6GAL1/SUMO1/PRKCSH/RPN2/MTA1/VCP/UBC/FKBP1A/COMT/SIGMAR1/ST6GALNAC3/VEGFA/GATAD2A/PTGES3/SRPK1/HDAC2/RPS27A/HSP90AA1/RBBP4/IMPDH2/IMPDH1/PRMT1/FKBP4/KDM1A/HSP90AB1
TP53_REGULATES_TRANSCRIPTION_OF_DEATH_RECEPTORS_AND_LIGANDS	TP53_REGULATES_TRANSCRIPTION_OF_DEATH_RECEPTORS_AND_LIGANDS	10	0.802	1.82967	0.00198197	0.0120309	0.00827918	1954	tags=70%, list=12%, signal=62%	TNFRSF10B/TP53/TNFRSF10A/FAS/IGFBP3/TNFRSF10C/PPP1R13B
GLUTAMATE_AND_GLUTAMINE_METABOLISM	GLUTAMATE_AND_GLUTAMINE_METABOLISM	14	-0.752098	-1.74268	0.00198658	0.0120309	0.00827918	1758	tags=50%, list=11%, signal=45%	KYAT1/RIMKLB/GLUL/GOT2/GLUD1/ALDH18A1/PYCR1
SULFUR_AMINO_ACID_METABOLISM	SULFUR_AMINO_ACID_METABOLISM	26	-0.648076	-1.74766	0.00197742	0.0120309	0.00827918	512	tags=38%, list=3%, signal=37%	TXN2/SLC25A10/ENOPH1/ETHE1/GOT2/MTR/MTAP/CBS/MPST/AHCY
TRANSPORT_OF_THE_SLBP_DEPENDANT_MATURE_MRNA	TRANSPORT_OF_THE_SLBP_DEPENDANT_MATURE_MRNA	35	-0.611507	-1.75403	0.00195998	0.0120309	0.00827918	3070	tags=66%, list=19%, signal=53%	NUP43/NUP155/NUP133/ALYREF/EIF4E/TPR/NUP35/NUP214/NUP188/NUP160/NUP37/NUP153/NUP107/NUP85/NUP205/AAAS/SEH1L/NDC1/NUP210/NCBP2/NUP62/NUP88/SLBP
SIGNALING_BY_NOTCH	SIGNALING_BY_NOTCH	166	-0.42518	-1.51956	0.00203025	0.0122038	0.00839811	2760	tags=35%, list=17%, signal=29%	PSMA5/PSMD7/MAML2/WWC1/ARRB1/PSMB5/PSMB4/RBPJ/PSMA6/MIB1/PSMA3/NCOR2/CCND1/PSMA4/APH1A/PSMB6/PSMC3/NOTCH2/RBX1/PSMD11/JAG2/PSMC4/AKT1/PSMD3/MOV10/UBA52/FBXW7/CREB1/CDK8/NOTCH3/E2F3/HDAC3/PSMD4/PLXND1/SNW1/TLE1/TFDP1/PSMA7/DLK1/TFDP2/TBL1XR1/MAML3/CUL1/UBC/PSMB2/TBL1X/EGFR/KAT2A/E2F1/PSME3/PBX1/AGO2/CNTN1/YBX1/HDAC2/MDK/RPS27A/SMAD3
FORMATION_OF_ATP_BY_CHEMIOSMOTIC_COUPLING	FORMATION_OF_ATP_BY_CHEMIOSMOTIC_COUPLING	17	-0.728264	-1.79701	0.00203568	0.0122038	0.00839811	3992	tags=82%, list=24%, signal=62%	ATP5ME/ATP5F1E/MT-ATP8/ATP5MG/ATP5PB/ATP5F1C/ATP5MF/ATP5PO/ATP5F1B/ATP5F1D/ATP5MC3/ATP5MC1/ATP5F1A/ATP5MC2
POST_TRANSLATIONAL_MODIFICATION_SYNTHESIS_OF_GPI_ANCHORED_PROTEINS	POST_TRANSLATIONAL_MODIFICATION_SYNTHESIS_OF_GPI_ANCHORED_PROTEINS	71	0.452373	1.62193	0.00207163	0.0122951	0.00846095	1500	tags=20%, list=9%, signal=18%	PIGG/PGAP1/PIGQ/MELTF/LSAMP/TECTA/GPAA1/NTNG2/LYPD1/RECK/PIGM/CD109/PIGT/PIGK
CELL_CELL_COMMUNICATION	CELL_CELL_COMMUNICATION	113	0.394424	1.51927	0.00207078	0.0122951	0.00846095	3346	tags=35%, list=20%, signal=28%	FLNA/SDK2/SPTBN1/SPTAN1/PLEC/ITGA6/ARHGEF6/SRC/CADM3/CLDN15/IQGAP1/CD47/VASP/PTK2B/LAMA3/PXN/CDH18/CDH8/CD2AP/NECTIN2/JUP/NECTIN4/CADM2/CDH3/CLDN23/PARVA/ILK/LAMB3/PATJ/SIRPA/SKAP2/CLDN1/PTPN6/CDH10/FERMT2/PIK3CB/LIMS1/KIRREL2/FLNC
RHO_GTPASE_EFFECTORS	RHO_GTPASE_EFFECTORS	252	-0.388273	-1.45698	0.00212445	0.0125459	0.00863353	3663	tags=35%, list=22%, signal=28%	PIN1/PKN1/NUDC/CENPK/ZWINT/LIMK1/NF2/ERCC6L/MYLK/MAPK14/NCKIPSD/PAK1/CENPI/KTN1/CTNNA1/NUP43/ACTG1/KDM4C/CDC20/CFL1/KIF2A/NUP133/ROCK2/ARPC3/PPP1R14A/PPP2R1B/ABI2/CLASP1/PPP2R5E/RHOQ/ARPC1A/WIPF3/DYNLL1/DIAPH2/RPS27/PMF1/BRK1/CLASP2/ARPC1B/WASF1/SPC24/ARPC2/BIRC5/NUP160/TUBB4A/PPP2CA/CENPF/NUP37/TUBB2A/RAC1/PLK1/DYNC1I2/WASF3/PAK2/NUP107/CALM1/ACTR3/NUP85/CKAP5/EVL/BUB1B/ACTB/YWHAH/SEH1L/YWHAQ/DI…
REGULATION_OF_TP53_ACTIVITY	REGULATION_OF_TP53_ACTIVITY	157	-0.429271	-1.52163	0.00215861	0.0126808	0.00872641	2762	tags=33%, list=17%, signal=28%	PPP2R1B/MEAF6/PRKAA2/PRKAG1/CDK1/ATR/RFC2/RMI1/TAF5/RFC4/KAT5/PHF20/TAF4B/TP53RK/POU4F2/WRN/AKT1/RFC3/RPA1/UBA52/BLM/BRD7/SMYD2/PPP2CA/RBBP7/EHMT1/RFFL/DYRK2/CHEK1/ING5/RHNO1/NBN/CHEK2/RMI2/USP7/UBC/CSNK2A1/EXO1/RBBP8/CCNA2/PPP2R1A/GATAD2A/CDK2/DNA2/AURKB/SUPT16H/HDAC2/RPS27A/RBBP4/CDK5R1/SSRP1/MAP2K6
HCMV_LATE_EVENTS	HCMV_LATE_EVENTS	52	-0.556528	-1.69629	0.00216867	0.0126808	0.00872641	3070	tags=58%, list=19%, signal=47%	NUP98/CHMP4B/NUP50/NUP54/NUP43/NUP155/NUP133/VPS25/VPS4A/VPS36/MVB12B/TPR/VPS28/NUP35/NUP214/NUP188/NUP160/CHMP3/NUP37/NUP153/NUP107/NUP85/NUP205/AAAS/SEH1L/NDC1/NUP210/NUP62/NUP88/HNRNPK
DEFECTIVE_CFTR_CAUSES_CYSTIC_FIBROSIS	DEFECTIVE_CFTR_CAUSES_CYSTIC_FIBROSIS	56	-0.536389	-1.64996	0.00232112	0.0135058	0.00929408	4033	tags=55%, list=25%, signal=42%	PSMF1/PSMB1/PSMC2/PSMD1/SEM1/PSMA2/PSMD14/PSME1/PSMB7/PSME4/PSMA5/PSMD7/PSMB5/PSMB4/PSMA6/PSMA3/PSMA4/PSMB6/PSMC3/PSMD11/PSMC4/PSMD3/UBA52/PSMD4/VCP/PSMA7/ERLIN1/UBC/PSMB2/PSME3/RPS27A
INTERLEUKIN_20_FAMILY_SIGNALING	INTERLEUKIN_20_FAMILY_SIGNALING	17	0.685216	1.77588	0.00247418	0.0142566	0.00981075	1611	tags=41%, list=10%, signal=37%	STAT3/JAK1/STAT1/TYK2/STAT2/JAK2/STAT5A
B_WICH_COMPLEX_POSITIVELY_REGULATES_RRNA_EXPRESSION	B_WICH_COMPLEX_POSITIVELY_REGULATES_RRNA_EXPRESSION	28	-0.653416	-1.78777	0.00247367	0.0142566	0.00981075	1008	tags=36%, list=6%, signal=34%	POLR1B/ACTB/POLR1E/KAT2A/TAF1D/POLR1A/MYBBP1A/BAZ1B/DEK/DDX21
NEGATIVE_REGULATION_OF_FLT3	NEGATIVE_REGULATION_OF_FLT3	14	-0.741155	-1.71733	0.00254969	0.0146207	0.0100613	3119	tags=50%, list=19%, signal=40%	ABL2/SOCS2/SOCS6/UBA52/CSK/UBC/RPS27A
AKT_PHOSPHORYLATES_TARGETS_IN_THE_CYTOSOL	AKT_PHOSPHORYLATES_TARGETS_IN_THE_CYTOSOL	14	0.717225	1.78488	0.00256546	0.0146404	0.0100749	1323	tags=36%, list=8%, signal=33%	MDM2/CDKN1A/TSC2/CDKN1B/BAD
INTERLEUKIN_2_FAMILY_SIGNALING	INTERLEUKIN_2_FAMILY_SIGNALING	33	0.56476	1.73099	0.00265008	0.015051	0.0103574	1642	tags=36%, list=10%, signal=33%	SHC1/INPPL1/STAT3/JAK1/INPP5D/STAT1/GAB2/JAK2/PTK2B/SOS2/STAT5A/SYK
CASPASE_ACTIVATION_VIA_DEATH_RECEPTORS_IN_THE_PRESENCE_OF_LIGAND	CASPASE_ACTIVATION_VIA_DEATH_RECEPTORS_IN_THE_PRESENCE_OF_LIGAND	12	0.770626	1.83623	0.00278594	0.0157217	0.010819	1776	tags=58%, list=11%, signal=52%	TNFRSF10B/TNFRSF10A/CFLAR/FAS/CASP8/RIPK1/TRADD
DISORDERS_OF_TRANSMEMBRANE_TRANSPORTERS	DISORDERS_OF_TRANSMEMBRANE_TRANSPORTERS	156	-0.421145	-1.4911	0.00279467	0.0157217	0.010819	3093	tags=32%, list=19%, signal=26%	PSMB7/NUP43/PSME4/NUP155/NUP133/PSMA5/PSMD7/PSMB5/SLC40A1/PSMB4/PSMA6/PSMA3/PSMA4/PSMB6/PSMC3/TPR/PSMD11/PSMC4/SLC17A5/NUP35/NUP214/PSMD3/NUP188/SLC1A1/NUP160/UBA52/NUP37/PSMD4/NUP153/ABCA3/NUP107/VCP/PSMA7/NUP85/NUP205/ERLIN1/AAAS/UBC/PSMB2/SEH1L/NDC1/SLC16A1/SLC11A2/NUP210/NUP62/PSME3/NUP88/HK1/RPS27A/SLC2A1
NONHOMOLOGOUS_END_JOINING_NHEJ	NONHOMOLOGOUS_END_JOINING_NHEJ	35	-0.597704	-1.71444	0.00287557	0.0161005	0.0110797	2264	tags=34%, list=14%, signal=30%	UBE2N/KAT5/TDP1/ABRAXAS1/UBE2V2/SUMO1/NBN/RIF1/XRCC6/PRKDC/XRCC5/NSD2
POLYMERASE_SWITCHING_ON_THE_C_STRAND_OF_THE_TELOMERE	POLYMERASE_SWITCHING_ON_THE_C_STRAND_OF_THE_TELOMERE	26	-0.637166	-1.71824	0.00291485	0.0162438	0.0111783	2870	tags=58%, list=18%, signal=48%	POLA2/PRIM2/TINF2/CHTF8/RFC2/RFC4/RFC3/RFC1/PRIM1/POLD3/POLD1/DSCC1/POLD2/PCNA/POLA1
DEADENYLATION_DEPENDENT_MRNA_DECAY	DEADENYLATION_DEPENDENT_MRNA_DECAY	55	-0.531781	-1.63459	0.00295252	0.0163768	0.0112698	3800	tags=49%, list=23%, signal=38%	CNOT6L/CNOT11/EXOSC6/EXOSC4/DCP2/LSM6/CNOT2/EIF4E/CNOT7/DCPS/EXOSC7/EXOSC9/EXOSC3/EXOSC8/PAIP1/CNOT1/EIF4B/DDX6/CNOT10/LSM7/TUT4/LSM4/EXOSC5/EIF4G1/CNOT9/TNKS1BP1/PABPC1
RESPIRATORY_ELECTRON_TRANSPORT	RESPIRATORY_ELECTRON_TRANSPORT	102	-0.449763	-1.52844	0.0029981	0.0165523	0.0113906	4658	tags=51%, list=29%, signal=37%	NDUFA10/NDUFV3/TMEM126B/COX5B/NDUFA12/SDHB/NDUFB3/MT-CO3/COX4I1/NUBPL/COX14/COX20/TMEM186/UQCRQ/NDUFB9/CYC1/UQCRB/NDUFS8/ETFA/ETFDH/NDUFAF2/UQCRFS1/SDHA/COX6A1/COX8A/COX6B1/NDUFA4/NDUFS6/NDUFB6/UQCRC2/NDUFB7/NDUFB8/NDUFS4/NDUFAF4/COX18/NDUFV2/NDUFB11/COA1/COX6C/NDUFS1/UQCRC1/COX7B/NDUFB10/ECSIT/COX7C/NDUFB4/LRPPRC/NDUFS5/NDUFS2/UQCRH/COX5A/TRAP1
EGR2_AND_SOX10_MEDIATED_INITIATION_OF_SCHWANN_CELL_MYELINATION	EGR2_AND_SOX10_MEDIATED_INITIATION_OF_SCHWANN_CELL_MYELINATION	27	-0.649817	-1.77305	0.00301793	0.0165846	0.0114128	2400	tags=44%, list=15%, signal=38%	DRP2/TEAD1/CYP51A1/SCD5/NAB1/POU3F2/SREBF2/LAMC1/LAMB1/HMGCR/HDAC2/SMARCA4
HDR_THROUGH_HOMOLOGOUS_RECOMBINATION_HRR	HDR_THROUGH_HOMOLOGOUS_RECOMBINATION_HRR	67	-0.510008	-1.62901	0.00307292	0.016809	0.0115673	3018	tags=49%, list=18%, signal=40%	BRIP1/MRE11/RAD51AP1/XRCC2/RAD51/ATR/RFC2/RMI1/EME1/RFC4/KAT5/WRN/RFC3/RFC1/RPA1/UBA52/BLM/POLE3/CHEK1/RHNO1/NBN/POLE2/RMI2/UBC/EXO1/RBBP8/POLD3/SPIDR/POLD1/DNA2/RPS27A/POLD2/PCNA
PROCESSING_OF_CAPPED_INTRONLESS_PRE_MRNA	PROCESSING_OF_CAPPED_INTRONLESS_PRE_MRNA	28	-0.646828	-1.76974	0.00318553	0.0173451	0.0119361	3142	tags=61%, list=19%, signal=49%	LSM10/CSTF2T/NUDT21/CPSF4/SNRPG/CPSF3/SNRPE/PABPN1/WDR33/CSTF3/CPSF2/PAPOLA/NCBP2/SNRPF/SNRPB/SLBP/SYMPK
SYNTHESIS_OF_ACTIVE_UBIQUITIN_ROLES_OF_E1_AND_E2_ENZYMES	SYNTHESIS_OF_ACTIVE_UBIQUITIN_ROLES_OF_E1_AND_E2_ENZYMES	30	-0.628084	-1.74224	0.00336952	0.0182631	0.0125679	2729	tags=67%, list=17%, signal=56%	UBE2Z/UBA1/UBE2Q2/UBE2G2/CDC34/UBE2T/UBA6/UBE2C/UBA52/UBE2E1/UBE2D2/UBE2L3/UBE2K/USP7/UBC/UBE2G1/UBE2E3/USP5/UBE2R2/RPS27A
TRANSCRIPTIONAL_REGULATION_BY_RUNX2	TRANSCRIPTIONAL_REGULATION_BY_RUNX2	112	-0.442298	-1.51653	0.0035236	0.018982	0.0130626	4033	tags=46%, list=25%, signal=35%	PSMF1/PSMB1/CCNB1/MAPK1/STUB1/PSMC2/PSMD1/ZNF521/SEM1/PSMA2/PSMD14/PSME1/GSK3B/SKP1/PSMB7/PSME4/PSMA5/PSMD7/PSMB5/PSMB4/PSMA6/CDK1/PSMA3/CCND1/PSMA4/YES1/PSMB6/PSMC3/RBX1/TWIST1/PSMD11/PSMC4/AKT1/PSMD3/UBA52/FBXW7/HDAC3/PSMD4/PPARGC1B/PSMA7/SMAD6/HAND2/CUL1/UBC/PSMB2/ABL1/PSME3/RBM14/RPS27A/CDK4/SKP2
E3_UBIQUITIN_LIGASES_UBIQUITINATE_TARGET_PROTEINS	E3_UBIQUITIN_LIGASES_UBIQUITINATE_TARGET_PROTEINS	44	-0.557543	-1.64606	0.00353413	0.018982	0.0130626	3152	tags=52%, list=19%, signal=42%	WAC/PEX13/RNF152/RNF20/UBE2N/HLTF/RAD18/PEX5/SHPRH/PEX2/UBE2V2/UBE2D3/UBA52/UBE2E1/UBE2D2/RTF1/UBE2L3/VCP/UBC/LEO1/RPS27A/PRKDC/PCNA
DEGRADATION_OF_THE_EXTRACELLULAR_MATRIX	DEGRADATION_OF_THE_EXTRACELLULAR_MATRIX	123	0.379952	1.47198	0.00360679	0.019285	0.0132711	1700	tags=19%, list=10%, signal=17%	TIMP2/ADAMTS9/LAMA5/CTSV/COL6A2/COL6A1/COL6A6/FBN1/CAPN10/COL7A1/CAPN1/COL5A1/CASP3/BCAN/COL11A1/COL4A1/CTSB/COL3A1/CAPN5/LAMA3/COL5A2/PHYKPL/COL16A1
MUCOPOLYSACCHARIDOSES	MUCOPOLYSACCHARIDOSES	11	0.74891	1.77808	0.00364737	0.0194145	0.0133602	2060	tags=55%, list=13%, signal=48%	IDS/ARSB/IDUA/SGSH/HGSNAT/GNS
TGF_BETA_RECEPTOR_SIGNALING_IN_EMT_EPITHELIAL_TO_MESENCHYMAL_TRANSITION	TGF_BETA_RECEPTOR_SIGNALING_IN_EMT_EPITHELIAL_TO_MESENCHYMAL_TRANSITION	16	-0.734746	-1.77414	0.00381336	0.0202074	0.0139059	1613	tags=38%, list=10%, signal=34%	UBA52/PARD3/UBC/FKBP1A/RHOA/RPS27A
CHONDROITIN_SULFATE_DERMATAN_SULFATE_METABOLISM	CHONDROITIN_SULFATE_DERMATAN_SULFATE_METABOLISM	48	0.503221	1.70257	0.00406983	0.0214706	0.0147752	1717	tags=33%, list=11%, signal=30%	IDS/ARSB/AGRN/IDUA/CHPF/XYLT1/VCAN/NCAN/B3GAT1/CHST11/BCAN/DSE/B3GAT3/CHPF2/SDC4/CSGALNACT2
NEUROTOXICITY_OF_CLOSTRIDIUM_TOXINS	NEUROTOXICITY_OF_CLOSTRIDIUM_TOXINS	10	0.779836	1.77911	0.00411705	0.0215345	0.0148191	395	tags=30%, list=2%, signal=29%	SYT1/STX1A/VAMP1
TRANSCRIPTIONAL_ACTIVITY_OF_SMAD2_SMAD3_SMAD4_HETEROTRIMER	TRANSCRIPTIONAL_ACTIVITY_OF_SMAD2_SMAD3_SMAD4_HETEROTRIMER	45	-0.556803	-1.66252	0.00411823	0.0215345	0.0148191	2409	tags=38%, list=15%, signal=32%	TGIF1/NCOR2/UBE2D3/UBA52/CDK8/E2F5/PPM1A/NEDD4L/SNW1/TFDP1/SP1/TFDP2/UBC/PARP1/TGIF2/RPS27A/SMAD3
DNA_DAMAGE_RECOGNITION_IN_GG_NER	DNA_DAMAGE_RECOGNITION_IN_GG_NER	38	-0.566762	-1.64863	0.0041505	0.0215506	0.0148302	2255	tags=45%, list=14%, signal=39%	YY1/ACTL6A/CETN2/MCRS1/RBX1/INO80E/UBA52/CUL4A/DDB1/PARP2/ACTB/RUVBL1/UBC/PARP1/RAD23A/RAD23B/RPS27A
HSF1_ACTIVATION	HSF1_ACTIVATION	25	-0.642723	-1.71954	0.00415762	0.0215506	0.0148302	1622	tags=36%, list=10%, signal=32%	HSPH1/RPA1/DNAJB6/VCP/PTGES3/EEF1A1/HSP90AA1/FKBP4/HSP90AB1
CARDIAC_CONDUCTION	CARDIAC_CONDUCTION	113	0.37797	1.4559	0.00437545	0.0225811	0.0155393	3043	tags=27%, list=19%, signal=22%	DMPK/CACNA2D2/ATP1B1/ITPR1/SCN8A/SCN3B/RYR2/SLC8A3/SCN4B/HIPK1/SCN3A/CACNG8/RYR3/RYR1/ATP2B1/ATP2A3/ATP2A1/ATP2B2/CACNA1C/KCNK13/ATP2B4/SCN10A/CACNG7/KCNIP4/ITPR2/ATP1B2/KAT2B/SCN9A/SCN11A/WWTR1/CACNG4
PHASE_2_PLATEAU_PHASE	PHASE_2_PLATEAU_PHASE	14	0.696517	1.73335	0.00443933	0.0228116	0.015698	3043	tags=36%, list=19%, signal=29%	CACNA2D2/CACNG8/CACNA1C/CACNG7/CACNG4
CELL_JUNCTION_ORGANIZATION	CELL_JUNCTION_ORGANIZATION	80	0.415537	1.53159	0.00452858	0.0231699	0.0159445	2972	tags=31%, list=18%, signal=26%	FLNA/SDK2/PLEC/ITGA6/ARHGEF6/CADM3/CLDN15/VASP/LAMA3/PXN/CDH18/CDH8/NECTIN2/JUP/NECTIN4/CADM2/CDH3/CLDN23/PARVA/ILK/LAMB3/PATJ/CLDN1/CDH10/FERMT2
POLO_LIKE_KINASE_MEDIATED_EVENTS	POLO_LIKE_KINASE_MEDIATED_EVENTS	16	-0.726956	-1.75533	0.00460652	0.0234676	0.0161494	1542	tags=44%, list=9%, signal=40%	CENPF/PKMYT1/PLK1/WEE1/CDC25A/RBBP4/MYBL2
INTERLEUKIN_15_SIGNALING	INTERLEUKIN_15_SIGNALING	13	0.725156	1.75765	0.00476298	0.0240581	0.0165557	1611	tags=46%, list=10%, signal=42%	SHC1/STAT3/JAK1/GAB2/SOS2/STAT5A
CELLULAR_RESPONSE_TO_HEAT_STRESS	CELLULAR_RESPONSE_TO_HEAT_STRESS	94	-0.460519	-1.54801	0.00475139	0.0240581	0.0165557	2323	tags=33%, list=14%, signal=28%	ATR/HSPH1/HIKESHI/TPR/NUP35/NUP214/NUP188/NUP160/RPA1/NUP37/DNAJB6/NUP153/HSPA9/NUP107/VCP/NUP85/NUP205/HSPA12A/HSPA4/AAAS/SEH1L/NDC1/NUP210/NUP62/NUP88/PTGES3/HSPA8/EEF1A1/HSP90AA1/FKBP4/HSP90AB1
INTERLEUKIN_1_SIGNALING	INTERLEUKIN_1_SIGNALING	93	-0.465866	-1.55762	0.00481821	0.024234	0.0166768	4033	tags=45%, list=25%, signal=34%	PSMF1/PSMB1/TNIP2/PSMC2/PSMD1/SEM1/PSMA2/PSMD14/PSME1/UBE2V1/SKP1/PSMB7/PSME4/NFKB1/PSMA5/PSMD7/PSMB5/NOD1/PSMB4/PSMA6/PSMA3/UBE2N/PSMA4/PSMB6/PSMC3/RBX1/PSMD11/PSMC4/TAB1/PSMD3/UBA52/PSMD4/APP/PELI1/PSMA7/CUL1/UBC/PSMB2/PSME3/RPS27A/MAP2K6/HMGB1
TRANSLESION_SYNTHESIS_BY_POLH	TRANSLESION_SYNTHESIS_BY_POLH	19	-0.682165	-1.71183	0.00496889	0.0248864	0.0171257	2318	tags=58%, list=14%, signal=50%	RFC2/RFC4/RFC3/RFC1/RPA1/UBA52/UFD1/VCP/UBC/RPS27A/PCNA
MITOTIC_PROPHASE	MITOTIC_PROPHASE	80	-0.481611	-1.57661	0.00500262	0.0249047	0.0171383	2238	tags=39%, list=14%, signal=34%	RAB1B/MASTL/USO1/CTDNEP1/TPR/NUP35/NUP214/NUP188/NUP160/NCAPD3/PPP2CA/ARPP19/NUP37/PLK1/NUP153/NUP107/NUP85/NUP205/ENSA/AAAS/BANF1/SEH1L/NDC1/NUP210/VRK1/PPP2R1A/NUP62/NUP88/TMPO/LMNB1/SET
JOSEPHIN_DOMAIN_DUBS	JOSEPHIN_DOMAIN_DUBS	11	-0.764442	-1.67198	0.0050145	0.0249047	0.0171383	2537	tags=64%, list=16%, signal=54%	JOSD1/UBA52/VCP/UBC/RAD23A/RAD23B/RPS27A
CITRIC_ACID_CYCLE_TCA_CYCLE	CITRIC_ACID_CYCLE_TCA_CYCLE	22	-0.657168	-1.70608	0.00515564	0.0254989	0.0175473	3141	tags=59%, list=19%, signal=48%	SDHA/SUCLG2/ME3/NNT/DLST/DLD/ACO2/SUCLG1/FH/CS/MDH2/ME2/IDH2
EXTRA_NUCLEAR_ESTROGEN_SIGNALING	EXTRA_NUCLEAR_ESTROGEN_SIGNALING	69	-0.492276	-1.57589	0.00520217	0.0256223	0.0176321	2369	tags=33%, list=15%, signal=29%	ELK1/CCND1/GNB1/GNB3/GNG12/AKT1/MMP2/CREB1/GNAI1/NRAS/CALM1/BCL2/IGF1R/EGFR/PIK3R1/GNG5/GNB4/XPO1/PTK2/GNG4/HSP90AA1/PIK3R3/PRMT1
RHOU_GTPASE_CYCLE	RHOU_GTPASE_CYCLE	40	0.511085	1.64875	0.00526928	0.0258241	0.017771	2065	tags=40%, list=13%, signal=35%	SPTBN1/SPTAN1/HGS/PAK3/ARHGEF6/SRC/IQGAP1/PTK2B/PAK4/ARHGAP31/STAM/MYO6/ARHGAP30/EPHA2/SRGAP2/ITSN2
NUCLEAR_ENVELOPE_BREAKDOWN	NUCLEAR_ENVELOPE_BREAKDOWN	51	-0.513187	-1.55802	0.00528665	0.0258241	0.017771	1922	tags=43%, list=12%, signal=38%	CTDNEP1/TPR/NUP35/NUP214/NUP188/NUP160/NUP37/PLK1/NUP153/NUP107/NUP85/NUP205/AAAS/BANF1/SEH1L/NDC1/NUP210/VRK1/NUP62/NUP88/TMPO/LMNB1
METABOLISM_OF_VITAMINS_AND_COFACTORS	METABOLISM_OF_VITAMINS_AND_COFACTORS	165	-0.405839	-1.45046	0.00532376	0.0258988	0.0178224	2593	tags=26%, list=16%, signal=22%	SLC23A2/PANK1/LPL/PARP4/NFS1/SDC2/PDSS1/SLC19A3/FPGS/COQ2/COQ3/MCCC2/RBP1/FLAD1/SLC19A1/VKORC1/AKT1/CD320/CYB5A/MMACHC/GSTO1/AASDHPPT/CALM1/HSPG2/NAMPT/VKORC1L1/SLC5A6/LDLR/SDC1/PANK3/MTHFD2/ALDH1L2/MTHFD1L/MTR/GPC2/LRP8/IDH1/NMNAT2/HSP90AA1/SHMT2/SLC2A1/MTHFD1/FASN
CYCLIN_D_ASSOCIATED_EVENTS_IN_G1	CYCLIN_D_ASSOCIATED_EVENTS_IN_G1	46	-0.530279	-1.58447	0.00535273	0.0259334	0.0178463	1748	tags=39%, list=11%, signal=35%	CKS1B/UBA52/PPP2CA/CCNE1/E2F2/E2F5/E2F3/TFDP1/TFDP2/CUL1/UBC/ABL1/PPP2R1A/E2F1/CDK2/RPS27A/CDK4/SKP2
TRANSPORT_OF_CONNEXONS_TO_THE_PLASMA_MEMBRANE	TRANSPORT_OF_CONNEXONS_TO_THE_PLASMA_MEMBRANE	16	-0.718875	-1.73582	0.00552171	0.0266434	0.0183348	1612	tags=31%, list=10%, signal=28%	TUBB4A/TUBB2A/TUBB2B/TUBA1A/TUBA1B
REGULATION_OF_GLUCOKINASE_BY_GLUCOKINASE_REGULATORY_PROTEIN	REGULATION_OF_GLUCOKINASE_BY_GLUCOKINASE_REGULATORY_PROTEIN	31	-0.594155	-1.66039	0.0055842	0.0266461	0.0183367	1912	tags=71%, list=12%, signal=63%	NUP98/NUP50/NUP54/NUP43/NUP155/NUP133/TPR/NUP35/NUP214/NUP188/NUP160/NUP37/NUP153/NUP107/NUP85/NUP205/AAAS/SEH1L/NDC1/NUP210/NUP62/NUP88
PYRUVATE_METABOLISM	PYRUVATE_METABOLISM	28	-0.629797	-1.72314	0.00556718	0.0266461	0.0183367	1619	tags=46%, list=10%, signal=42%	MPC1/DLAT/PDP2/DLD/PDHB/GLO1/GSTZ1/PDHA1/SLC16A1/VDAC1/LDHB/LDHA/PDK1
GLYCOGEN_SYNTHESIS	GLYCOGEN_SYNTHESIS	15	-0.730757	-1.72564	0.00558962	0.0266461	0.0183367	2803	tags=53%, list=17%, signal=44%	GYS1/GYG1/PGM2L1/UBA52/PGM2/UBC/PGM1/RPS27A
RAS_PROCESSING	RAS_PROCESSING	24	-0.642945	-1.70399	0.00561769	0.0266728	0.018355	1613	tags=38%, list=10%, signal=34%	UBA52/NRAS/CALM1/ZDHHC9/ABHD17C/UBC/ARL2/LYPLA1/RPS27A
SUMOYLATION_OF_UBIQUITINYLATION_PROTEINS	SUMOYLATION_OF_UBIQUITINYLATION_PROTEINS	38	-0.559065	-1.62624	0.00565975	0.0267654	0.0184188	2085	tags=50%, list=13%, signal=44%	PIAS2/TPR/UBE2I/NUP35/NUP214/NUP188/NUP160/NUP37/SUMO1/NUP153/NUP107/NUP85/NUP205/AAAS/SEH1L/NDC1/NUP210/NUP62/NUP88
TCR_SIGNALING	TCR_SIGNALING	106	-0.447393	-1.5241	0.005722	0.0269524	0.0185475	4100	tags=42%, list=25%, signal=32%	CD247/PSMF1/PSMB1/PSMC2/PSMD1/SEM1/PSMA2/PSMD14/PSME1/UBE2V1/PAK1/SKP1/PSMB7/PSME4/PTEN/NFKB1/PSMA5/PSMD7/PSMB5/PSMB4/PSMA6/PSMA3/UBE2N/PSMA4/CDC34/PSMB6/PSMC3/PSMD11/PSMC4/PSMD3/UBA52/PLCG1/UBE2D2/CSK/PSMD4/PAK2/PSMA7/ENAH/EVL/CUL1/UBC/PSMB2/PIK3R1/PSME3/RPS27A
ESR_MEDIATED_SIGNALING	ESR_MEDIATED_SIGNALING	151	-0.409081	-1.45227	0.00587912	0.0275831	0.0189815	2173	tags=26%, list=13%, signal=23%	KAT5/CCND1/STAG2/GNB1/GNB3/PPID/GNG12/AKT1/MMP2/MOV10/CREB1/GNAI1/GREB1/JUND/GPAM/NRAS/SMC3/CALM1/SP1/BCL2/IGF1R/EGFR/SMC1A/PIK3R1/GNG5/GNB4/AGO2/PTGES3/KPNA2/FKBP5/XPO1/PTK2/GNG4/HSP90AA1/PIK3R3/CARM1/PRMT1/FKBP4/KDM1A/HSP90AB1
ECM_PROTEOGLYCANS	ECM_PROTEOGLYCANS	67	0.434673	1.53195	0.0059931	0.0280071	0.0192733	1675	tags=30%, list=10%, signal=27%	LAMB2/LAMA5/ITGAV/AGRN/COL6A2/COL6A1/COL6A6/TNR/COL5A1/VCAN/NCAN/ITGA7/BCAN/SPARC/COL4A1/COL3A1/LAMA3/COL5A2/ITGA2B/ITGA2
SIGNALING_BY_RECEPTOR_TYROSINE_KINASES	SIGNALING_BY_RECEPTOR_TYROSINE_KINASES	488	0.269903	1.21995	0.00606275	0.0282215	0.0194208	2552	tags=23%, list=16%, signal=20%	POLR2A/DUSP4/LAMB2/NTRK1/SHC1/PLAT/PGF/KITLG/LAMA5/ATP6AP1/STAT3/MEF2A/THBS1/ALK/PDPK1/ID1/ITGAV/CYFIP2/HGS/SPINT2/ITPR1/ITGA3/STAT1/MST1/NTRK3/IRS2/COL6A2/ATP6V0A1/COL6A1/PAK3/DUSP6/ID4/COL6A6/DLG4/FOS/FGFR3/ID2/BAX/COL5A1/SRC/GAB2/ATP6V1B2/MET/NEDD4/HBEGF/KIDINS220/GABRQ/VRK3/JAK2/FRS2/RALB/ADCYAP1/USP8/COL11A1/RANBP10/SPARC/COL4A1/ATP6V1A/ATP6V1E1/ATP6V1H/MAP2K5/NRP1/PTK2B/COL3A1/BRAF/LAMA3/SG…
RAF_INDEPENDENT_MAPK1_3_ACTIVATION	RAF_INDEPENDENT_MAPK1_3_ACTIVATION	22	0.609307	1.73923	0.0061413	0.0284755	0.0195956	2701	tags=50%, list=17%, signal=42%	DUSP4/JAK1/TYK2/DUSP6/PEA15/IL6ST/JAK2/DUSP10/DUSP1/DUSP2/DUSP5
TRANSLATION_OF_SARS_COV_1_STRUCTURAL_PROTEINS	TRANSLATION_OF_SARS_COV_1_STRUCTURAL_PROTEINS	29	-0.597845	-1.64184	0.0061731	0.0285116	0.0196204	2440	tags=34%, list=15%, signal=29%	PARP4/ST3GAL1/UBE2I/UBA52/ST6GAL1/SUMO1/PRKCSH/UBC/ST6GALNAC3/RPS27A
DOWNREGULATION_OF_TGF_BETA_RECEPTOR_SIGNALING	DOWNREGULATION_OF_TGF_BETA_RECEPTOR_SIGNALING	26	-0.614244	-1.65643	0.00621293	0.0285843	0.0196705	1613	tags=38%, list=10%, signal=35%	UBA52/MTMR4/NEDD4L/PMEPA1/ZFYVE9/UBC/PPP1CB/XPO1/RPS27A/SMAD3
CONSTITUTIVE_SIGNALING_BY_AKT1_E17K_IN_CANCER	CONSTITUTIVE_SIGNALING_BY_AKT1_E17K_IN_CANCER	26	0.595121	1.74308	0.00630494	0.0288956	0.0198847	1736	tags=31%, list=11%, signal=28%	MDM2/CDKN1A/TSC2/PDPK1/RPS6KB2/CDKN1B/BAD/FOXO1
INTERLEUKIN_12_FAMILY_SIGNALING	INTERLEUKIN_12_FAMILY_SIGNALING	49	-0.527821	-1.58644	0.00646516	0.0293365	0.0201881	2185	tags=37%, list=13%, signal=32%	P4HB/AIP/PDCD4/TCP1/TALDO1/SOD2/HSPA9/PAK2/GSTO1/SOD1/HNRNPA2B1/HNRNPF/MTAP/LMNB1/MSN/PPIA/HNRNPDL/RPLP0
TRANSLESION_SYNTHESIS_BY_Y_FAMILY_DNA_POLYMERASES_BYPASSES_LESIONS_ON_DNA_TEMPLATE	TRANSLESION_SYNTHESIS_BY_Y_FAMILY_DNA_POLYMERASES_BYPASSES_LESIONS_ON_DNA_TEMPLATE	38	-0.555245	-1.61513	0.00647529	0.0293365	0.0201881	2318	tags=45%, list=14%, signal=38%	RFC2/RFC4/RFC3/RFC1/RPA1/UBA52/POLE3/PCLAF/UFD1/VCP/POLE2/UBC/POLD3/POLD1/RPS27A/POLD2/PCNA
TRANSCRIPTION_OF_E2F_TARGETS_UNDER_NEGATIVE_CONTROL_BY_P107_RBL1_AND_P130_RBL2_IN_COMPLEX_WITH_HDAC1	TRANSCRIPTION_OF_E2F_TARGETS_UNDER_NEGATIVE_CONTROL_BY_P107_RBL1_AND_P130_RBL2_IN_COMPLEX_WITH_HDAC1	16	-0.713059	-1.72177	0.00643811	0.0293365	0.0201881	1471	tags=50%, list=9%, signal=46%	CDK1/E2F5/TFDP1/TFDP2/CCNA2/E2F1/RBBP4/MYBL2
INSULIN_RECEPTOR_RECYCLING	INSULIN_RECEPTOR_RECYCLING	22	0.604499	1.72551	0.00651633	0.0294102	0.0202388	2330	tags=50%, list=14%, signal=43%	ATP6AP1/ATP6V0A1/ATP6V1B2/ATP6V1A/ATP6V1E1/ATP6V1H/ATP6V0D1/ATP6V0C/ATP6V0B/ATP6V0E2/ATP6V1D
MITOTIC_SPINDLE_CHECKPOINT	MITOTIC_SPINDLE_CHECKPOINT	110	-0.4322	-1.47903	0.00657973	0.0295839	0.0203583	3812	tags=42%, list=23%, signal=32%	NUP98/BUB1/NUDC/CDC23/CENPK/ZWINT/ERCC6L/CENPI/NUP43/CDC20/KIF2A/NUP133/CDC27/PPP2R1B/CLASP1/PPP2R5E/ANAPC16/ANAPC15/ANAPC11/DYNLL1/RPS27/PMF1/CLASP2/SPC24/UBE2C/BIRC5/NUP160/PPP2CA/CENPF/UBE2E1/NUP37/PLK1/DYNC1I2/NUP107/NUP85/CKAP5/BUB1B/SEH1L/PPP2R1A/KNTC1/RCC2/AURKB/MAPRE1/XPO1/MAD2L1/CENPH
EFFECTS_OF_PIP2_HYDROLYSIS	EFFECTS_OF_PIP2_HYDROLYSIS	26	0.592867	1.73648	0.00699996	0.0313545	0.0215768	3087	tags=42%, list=19%, signal=34%	DGKK/ITPR1/DGKQ/DGKZ/DAGLA/DGKD/DGKG/DGKI/ITPR2/DGKA/DAGLB
REGULATION_OF_SIGNALING_BY_CBL	REGULATION_OF_SIGNALING_BY_CBL	22	-0.643864	-1.67154	0.0072965	0.0325599	0.0224063	2705	tags=41%, list=17%, signal=34%	RAPGEF1/YES1/FYN/UBA52/UBC/CRKL/PIK3R1/RPS27A/PIK3R3
SENSORY_PROCESSING_OF_SOUND	SENSORY_PROCESSING_OF_SOUND	69	0.427243	1.52331	0.00758342	0.0330938	0.0227737	1984	tags=25%, list=12%, signal=22%	CACNA2D2/SPTBN1/STX1A/SPTAN1/PCLO/MYH9/SYN1/GSN/TMIE/DNAJC5/ATP2B1/ATP2B2/EPS8L2/SYP/MYO7A/TRIOBP/EPS8
DEUBIQUITINATION	DEUBIQUITINATION	234	-0.374876	-1.3955	0.00749748	0.0330938	0.0227737	3468	tags=40%, list=21%, signal=32%	PSMC2/BIRC2/PSMD1/USP18/SEM1/PSMA2/PSMD14/USP28/TAF9B/TRIM25/PSME1/USP25/AXIN1/NEDD8/BABAM2/USP10/USP42/INO80/PSMB7/USP16/HIF1A/PSME4/CDC20/PTEN/USP14/SMAD2/USP37/PSMA5/PSMD7/UCHL5/ARRB1/PSMB5/WDR48/YY1/NOD1/OTUB1/PSMB4/RNF146/TOMM70/JOSD1/PSMA6/CDK1/CLSPN/OTUD3/VDAC2/PSMA3/ACTL6A/FKBP8/VDAC3/PSMA4/MCRS1/PSMB6/ABRAXAS1/PSMC3/SIAH2/PSMD11/PSMC4/TAB1/KDM1B/PSMD3/INO80E/UBA52/USP48/HCFC1/PSMD4/OGT/U…
SELECTIVE_AUTOPHAGY	SELECTIVE_AUTOPHAGY	75	-0.471131	-1.51683	0.0075523	0.0330938	0.0227737	2684	tags=36%, list=16%, signal=30%	PRKAA2/PARK7/PRKAG1/TOMM22/TOMM70/DYNLL1/MTERF3/UBE2N/TOMM7/PEX5/TOMM5/UBA52/TUBB4A/TUBB2A/DYNC1I2/VCP/PGAM5/UBC/CSNK2A1/HSPA8/RPS27A/HSP90AA1/VDAC1/TUBB2B/TUBA1A/TUBA1B/TOMM20
TELOMERE_MAINTENANCE	TELOMERE_MAINTENANCE	65	-0.489697	-1.5597	0.00756161	0.0330938	0.0227737	3000	tags=46%, list=18%, signal=38%	POLR2F/POLA2/PRIM2/TINF2/CHTF8/GAR1/RFC2/RFC4/TERT/WRN/RFC3/RFC1/RPA1/BLM/PRIM1/NOP10/RUVBL1/LIG1/CCNA2/POLD3/FEN1/POLD1/DSCC1/CDK2/DNA2/DKC1/NHP2/POLD2/PCNA/POLA1
TGF_BETA_RECEPTOR_SIGNALING_ACTIVATES_SMADS	TGF_BETA_RECEPTOR_SIGNALING_ACTIVATES_SMADS	32	-0.590141	-1.65737	0.00750179	0.0330938	0.0227737	1613	tags=34%, list=10%, signal=31%	UBA52/MTMR4/NEDD4L/PMEPA1/ZFYVE9/UBC/FKBP1A/PPP1CB/XPO1/RPS27A/SMAD3
AMINO_ACID_TRANSPORT_ACROSS_THE_PLASMA_MEMBRANE	AMINO_ACID_TRANSPORT_ACROSS_THE_PLASMA_MEMBRANE	30	-0.60414	-1.67582	0.00747898	0.0330938	0.0227737	2364	tags=37%, list=14%, signal=31%	SLC7A11/SLC38A5/SLC38A1/SLC1A4/SLC1A5/SLC43A1/SLC7A1/SLC6A15/SLC6A6/SLC7A5/SLC25A29
BIOLOGICAL_OXIDATIONS	BIOLOGICAL_OXIDATIONS	146	-0.406451	-1.43565	0.00774965	0.0336954	0.0231877	2993	tags=29%, list=18%, signal=24%	MGST3/UGDH/N6AMT1/GCLC/ALDH1B1/TRMT112/ALDH2/PAPSS2/ACY1/FDX1/CYP51A1/AIP/GCLM/BPHL/ABHD14B/PAPSS1/ACSS1/CYB5B/TPST2/ACSS2/MGST1/GSTM1/CHAC1/GSTO1/ARNT/GSTP1/ADH5/GSTZ1/CNDP2/GGCT/COMT/GSTA4/MAT2B/GSS/ESD/MTR/PTGES3/AKR1A1/PODXL2/MAT2A/HSP90AB1/AHCY
IL_6_TYPE_CYTOKINE_RECEPTOR_LIGAND_INTERACTIONS	IL_6_TYPE_CYTOKINE_RECEPTOR_LIGAND_INTERACTIONS	16	0.683263	1.74349	0.00820399	0.0355406	0.0244575	1867	tags=44%, list=11%, signal=39%	JAK1/TYK2/LIFR/IL6ST/JAK2/IL11/OSMR
HDR_THROUGH_MMEJ_ALT_NHEJ	HDR_THROUGH_MMEJ_ALT_NHEJ	10	-0.777376	-1.69456	0.00829181	0.0357905	0.0246294	1257	tags=60%, list=8%, signal=55%	NBN/PARP2/RBBP8/PARP1/FEN1/LIG3
ORGANELLE_BIOGENESIS_AND_MAINTENANCE	ORGANELLE_BIOGENESIS_AND_MAINTENANCE	276	-0.364636	-1.37756	0.00841259	0.0361802	0.0248977	3379	tags=33%, list=21%, signal=27%	TWNK/MAPK14/CCT8/NCOA6/GABPB1/PRKAG2/MT-ATP8/ATP5MG/EXOC2/ACTR1A/CEP290/CEP83/ARF4/ATP5PB/HAUS4/CRTC3/SMO/CLASP1/PRKAA2/PRKAG1/DYNLL1/ARL3/CDK1/IFT122/HAUS6/ATP5F1C/PLK4/CHCHD3/CEP57/BBS4/CETN2/ATP5MF/TTC21B/ATP5PO/HAUS8/ALMS1/DCTN2/ATP5F1B/TCP1/IQCB1/WDR35/TUBB4A/CSNK1E/CREB1/ATP5F1D/ATP5MC3/TUBB2A/HCFC1/PLK1/HDAC3/POLRMT/SOD2/ACSS2/HSPA9/CENPJ/DYNC1I2/EXOC6/CDK5RAP2/HAUS1/PPARGC1B/CALM1/CEP152/…
ALPHA_LINOLENIC_OMEGA3_AND_LINOLEIC_OMEGA6_ACID_METABOLISM	ALPHA_LINOLENIC_OMEGA3_AND_LINOLEIC_OMEGA6_ACID_METABOLISM	13	-0.724448	-1.65484	0.00844713	0.0361976	0.0249096	1192	tags=46%, list=7%, signal=43%	ELOVL2/ELOVL5/FADS2/HSD17B4/ACSL1/FADS1
POTENTIAL_THERAPEUTICS_FOR_SARS	POTENTIAL_THERAPEUTICS_FOR_SARS	77	-0.464162	-1.5054	0.00858468	0.0366547	0.0252242	786	tags=35%, list=5%, signal=34%	FNTB/ITGA4/CHD4/AP2B1/SAP30/ROCK2/PHF21A/SAP30L/FXYD6/RBX1/AP2S1/RBBP7/MTA1/FKBP1A/COMT/SIGMAR1/VEGFA/GATAD2A/PTGES3/HDAC2/HSP90AA1/RBBP4/IMPDH2/IMPDH1/FKBP4/KDM1A/HSP90AB1
SLC_TRANSPORTER_DISORDERS	SLC_TRANSPORTER_DISORDERS	84	-0.458958	-1.51778	0.00917346	0.0390283	0.0268576	1912	tags=26%, list=12%, signal=23%	TPR/SLC17A5/NUP35/NUP214/NUP188/SLC1A1/NUP160/NUP37/NUP153/NUP107/NUP85/NUP205/AAAS/SEH1L/NDC1/SLC16A1/SLC11A2/NUP210/NUP62/NUP88/HK1/SLC2A1
PI3K_AKT_SIGNALING_IN_CANCER	PI3K_AKT_SIGNALING_IN_CANCER	98	0.376953	1.43964	0.00925881	0.0391113	0.0269147	1354	tags=16%, list=8%, signal=15%	MDM2/KITLG/CDKN1A/TSC2/PDPK1/IRS2/RPS6KB2/CDKN1B/FGFR3/SRC/GAB2/MET/HBEGF/FRS2/BAD/ERBB2
MUSCLE_CONTRACTION	MUSCLE_CONTRACTION	168	0.335498	1.35918	0.00925887	0.0391113	0.0269147	3043	tags=26%, list=19%, signal=21%	DMPK/TPM1/CACNA2D2/ATP1B1/ACTA2/ITPR1/SCN8A/SCN3B/RYR2/SLC8A3/SCN4B/HIPK1/SCN3A/CACNG8/VCL/RYR3/TMOD1/ITGA1/TNNT2/RYR1/ATP2B1/ATP2A3/ATP2A1/ATP2B2/PXN/CACNA1C/KCNK13/TPM2/ATP2B4/SCN10A/CACNG7/KCNIP4/ITPR2/ATP1B2/ANXA1/MYL12B/KAT2B/GUCY1A2/SCN9A/SCN11A/WWTR1/LMOD1/CACNG4
FATTY_ACID_METABOLISM	FATTY_ACID_METABOLISM	154	-0.393644	-1.39932	0.00943759	0.0397166	0.0273312	2101	tags=17%, list=13%, signal=15%	SCD5/PECR/ECI1/ACADM/ACSL3/SLC25A1/DBI/ACOT7/MID1IP1/HACL1/ACSL4/LTA4H/CBR4/ELOVL2/ELOVL5/FADS2/HSD17B4/ACSL1/PTGES3/ELOVL6/HADH/HADHA/FADS1/ACLY/SCD/FASN
INTERLEUKIN_1_FAMILY_SIGNALING	INTERLEUKIN_1_FAMILY_SIGNALING	117	-0.42269	-1.45233	0.00946907	0.0397166	0.0273312	4033	tags=41%, list=25%, signal=31%	PSMF1/PSMB1/TNIP2/PSMC2/PSMD1/SEM1/PTPN9/PSMA2/PSMD14/PSME1/UBE2V1/SKP1/MAPK8/PSMB7/PSME4/NFKB1/PSMA5/PSMD7/PSMB5/NOD1/PSMB4/PSMA6/PTPN12/PSMA3/UBE2N/PTPN18/PSMA4/PSMB6/PSMC3/RBX1/PSMD11/PSMC4/TAB1/PSMD3/UBA52/PSMD4/APP/PELI1/PSMA7/PTPN13/CUL1/UBC/PSMB2/PSME3/RPS27A/SMAD3/MAP2K6/HMGB1
RECRUITMENT_OF_NUMA_TO_MITOTIC_CENTROSOMES	RECRUITMENT_OF_NUMA_TO_MITOTIC_CENTROSOMES	89	-0.449849	-1.49283	0.00972504	0.0406466	0.0279712	2867	tags=38%, list=18%, signal=32%	HAUS4/TUBGCP3/CLASP1/DYNLL1/CDK1/HAUS6/PLK4/CEP57/CETN2/HAUS8/TUBGCP2/ALMS1/DCTN2/TUBB4A/MZT2A/CSNK1E/TUBB2A/PLK1/CENPJ/DYNC1I2/CDK5RAP2/HAUS1/CEP152/CKAP5/TUBG1/YWHAG/PPP2R1A/MZT2B/CEP78/MAPRE1/HSP90AA1/TUBB2B/TUBA1A/TUBA1B
NUCLEAR_PORE_COMPLEX_NPC_DISASSEMBLY	NUCLEAR_PORE_COMPLEX_NPC_DISASSEMBLY	35	-0.56147	-1.6105	0.00976685	0.0406781	0.0279929	4041	tags=71%, list=25%, signal=54%	NEK6/CCNB1/NUP98/NUP50/NUP54/NUP43/NUP155/NUP133/CDK1/TPR/NUP35/NUP214/NUP188/NUP160/NUP37/NUP153/NUP107/NUP85/NUP205/AAAS/SEH1L/NDC1/NUP210/NUP62/NUP88
PROCESSING_OF_INTRONLESS_PRE_MRNAS	PROCESSING_OF_INTRONLESS_PRE_MRNAS	19	-0.662925	-1.66355	0.00998685	0.0414489	0.0285233	2907	tags=58%, list=18%, signal=48%	CSTF2T/NUDT21/CPSF4/CPSF3/PABPN1/WDR33/CSTF3/CPSF2/PAPOLA/NCBP2/SYMPK
TERMINATION_OF_TRANSLESION_DNA_SYNTHESIS	TERMINATION_OF_TRANSLESION_DNA_SYNTHESIS	31	-0.57234	-1.59943	0.0100605	0.0414646	0.0285342	2318	tags=48%, list=14%, signal=42%	RFC2/RFC4/RFC3/RFC1/RPA1/UBA52/POLE3/PCLAF/POLE2/UBC/POLD3/POLD1/RPS27A/POLD2/PCNA
GAP_JUNCTION_TRAFFICKING_AND_REGULATION	GAP_JUNCTION_TRAFFICKING_AND_REGULATION	39	-0.560564	-1.63089	0.0100542	0.0414646	0.0285342	1612	tags=23%, list=10%, signal=21%	TUBB4A/GJD2/TUBB2A/ACTB/DNM1/GJC1/TUBB2B/TUBA1A/TUBA1B
NCAM1_INTERACTIONS	NCAM1_INTERACTIONS	38	0.490634	1.55959	0.0103271	0.0422425	0.0290694	1526	tags=32%, list=9%, signal=29%	AGRN/COL6A2/COL6A1/COL6A6/PRNP/COL5A1/NCAN/GFRA2/COL4A1/COL3A1/COL5A2/CACNA1C
CELLULAR_SENESCENCE	CELLULAR_SENESCENCE	123	-0.410514	-1.42234	0.010356	0.0422425	0.0290694	2850	tags=37%, list=17%, signal=31%	NFKB1/RNF2/CDC27/ERF/EP400/TINF2/ANAPC16/CCNE2/ANAPC15/ANAPC11/PHC2/MAP4K4/TNIK/KAT5/SCMH1/SUZ12/UBE2C/MOV10/UBA52/EZH2/RBBP7/CCNE1/EHMT1/UBE2E1/E2F2/E2F3/NBN/TXN/MAPKAPK3/TFDP1/SP1/RPS6KA3/TFDP2/UBC/CCNA2/E2F1/CDK2/RPS6KA2/CBX2/ETS1/LMNB1/RPS27A/CDK4/RBBP4/MAP2K6/HMGA1
MASTL_FACILITATES_MITOTIC_PROGRESSION	MASTL_FACILITATES_MITOTIC_PROGRESSION	10	-0.768032	-1.67419	0.0103173	0.0422425	0.0290694	2762	tags=80%, list=17%, signal=67%	CCNB1/PPP2R1B/CDK1/MASTL/PPP2CA/ARPP19/ENSA/PPP2R1A
REGULATION_OF_PLK1_ACTIVITY_AT_G2_M_TRANSITION	REGULATION_OF_PLK1_ACTIVITY_AT_G2_M_TRANSITION	85	-0.443187	-1.46882	0.0109134	0.0443637	0.0305292	2508	tags=41%, list=15%, signal=35%	AJUBA/ACTR1A/CEP290/HAUS4/CLASP1/DYNLL1/CDK1/HAUS6/PLK4/CEP57/CETN2/HAUS8/ALMS1/DCTN2/UBA52/TUBB4A/CSNK1E/PLK1/CENPJ/DYNC1I2/CDK5RAP2/HAUS1/CEP152/CKAP5/CUL1/UBC/TUBG1/YWHAG/PPP2R1A/PPP1CB/CEP78/MAPRE1/RPS27A/HSP90AA1/TUBA1A
RESPONSE_OF_MTB_TO_PHAGOCYTOSIS	RESPONSE_OF_MTB_TO_PHAGOCYTOSIS	22	-0.625497	-1.62385	0.0113432	0.0458877	0.031578	856	tags=36%, list=5%, signal=35%	CORO1A/UBA52/UBC/KPNB1/RPS27A/PGK1/SFPQ/ENO1
REGULATION_OF_MECP2_EXPRESSION_AND_ACTIVITY	REGULATION_OF_MECP2_EXPRESSION_AND_ACTIVITY	30	-0.589655	-1.63564	0.0113656	0.0458877	0.031578	1629	tags=43%, list=10%, signal=39%	NCOR2/MOV10/SIN3A/CREB1/HDAC3/CALM1/TBL1XR1/TBL1X/LBR/CAMK4/AGO2/AURKB/HDAC2
O_GLYCOSYLATION_OF_TSR_DOMAIN_CONTAINING_PROTEINS	O_GLYCOSYLATION_OF_TSR_DOMAIN_CONTAINING_PROTEINS	38	0.486154	1.54535	0.011554	0.0464903	0.0319926	1548	tags=21%, list=9%, signal=19%	ADAMTS9/THSD4/THBS1/POFUT2/ADAMTS13/ADAMTS19/THSD7A/ADAMTS15
PRC2_METHYLATES_HISTONES_AND_DNA	PRC2_METHYLATES_HISTONES_AND_DNA	13	-0.713841	-1.63061	0.0116227	0.0466086	0.032074	2002	tags=54%, list=12%, signal=47%	DNMT3B/SUZ12/EZH2/RBBP7/MTF2/DNMT1/RBBP4
CASPASE_ACTIVATION_VIA_EXTRINSIC_APOPTOTIC_SIGNALLING_PATHWAY	CASPASE_ACTIVATION_VIA_EXTRINSIC_APOPTOTIC_SIGNALLING_PATHWAY	22	0.573361	1.63663	0.0117779	0.047072	0.0323929	1776	tags=41%, list=11%, signal=37%	TNFRSF10B/DAPK3/TNFRSF10A/CFLAR/CASP3/FAS/CASP8/RIPK1/TRADD
