# Supplementary material for: RUVBL1 and RUVBL2 as novel druggable DNA Damage Response regulators in the N-Myc regulatory network in neuroblastoma
Source: Research Square preprint supplement (doi:10.21203/rs.3.rs-3206227/v1), 2023-11-20
Supplement: Supplementary file 4 [file 8b60b4526f8126ad91dc20f8.xlsx]

## Sheet: legend
Tab names indicate different cell lines (SK-N-AS or CLB-BA), and time points (0hrs, 24hrs, 48hrs, and /2hrs).
The results here are summaries of the number of differentially expressed genes as presented in Table S1.
DE denotes Differenially Expressed genes. Genes are considered differentially expressed when absolute log2FC > 1, padjust=< 0.01, baseMean>10.
UP denotes Upregulated genes
DN denotes downregulated genes
NO denotes Not differentially expressed.

## Sheet: SK-N-AS_24hrs_vs_0hrs
DE	n
DN	31
NO	15948
UP	47

## Sheet: SK-N-AS_48hrs_vs_0hrs
DE	n
DN	101
NO	15751
UP	174

## Sheet: SK-N-AS_72hrs_vs_0hrs
DE	n
DN	524
NO	15067
UP	435

## Sheet: CLB-BA_24hrs_vs_0hrs
DE	n
DN	85
NO	16065
UP	165

## Sheet: CLB-BA_48hrs_vs_0hrs
DE	n
DN	350
NO	15276
UP	689

## Sheet: CLB-BA_72hrs_vs_0hrs
DE	n
DN	656
NO	14679
UP	980
