# Supplementary material for: RUVBL1 and RUVBL2 as novel druggable DNA Damage Response regulators in the N-Myc regulatory network in neuroblastoma
Source: Research Square preprint supplement (doi:10.21203/rs.3.rs-3206227/v1), 2023-11-20
Supplement: Supplementary file 5 [file ea339325970865b0ae2b5c60.xlsx]

## Sheet: legend
Pre-ranked gene set enrichement analysis using the HALLMARK gene set in CLB-BA cell line treated with CB-6644 for 72hrs compared to control (0hrs).

## Sheet: CLB-BA_72hrs_vs_0hrs
ID	Description	setSize	enrichmentScore	NES	pvalue	p.adjust	qvalues	rank	leading_edge	core_enrichment
MYC_TARGETS_V1	MYC_TARGETS_V1	195	-0.812472	-2.97967	4.89236e-50	2.44618e-48	1.08147e-48	1955	tags=76%, list=12%, signal=68%	SNRPG/ERH/EIF4E/TARDBP/RFC4/VDAC3/EXOSC7/PSMA4/NOP16/AIMP2/PPM1G/EIF3J/PSMC4/TUFM/NOP56/TXNL4A/TCP1/PSMD3/STARD7/TRA2B/POLE3/RRP9/UBE2E1/GLO1/LSM7/UBE2L3/RNPS1/ILF2/EIF3D/PHB/RPL22/TFDP1/XRCC6/PSMA7/PRDX4/CCT4/HDGF/FAM120A/CLNS1A/SF3B3/PRPS2/EEF1B2/SRSF7/USP1/CUL1/PSMB2/SNRPD1/YWHAQ/SSB/CCNA2/SNRPD2/XPOT/CDC45/NCBP2/CCT2/EIF1AX/GSPT1/HNRNPA2B1/EIF3B/RANBP1/RPL34/SRSF3/CCT7/PRDX3/RAD23B/HPRT1/GOT2…
E2F_TARGETS	E2F_TARGETS	197	-0.712879	-2.60804	2.66525e-28	6.66313e-27	2.94581e-27	1841	tags=52%, list=11%, signal=47%	ATAD2/EXOSC8/NOP56/DCLRE1B/CKS1B/UBE2T/RFC3/TRIP13/BIRC5/RFC1/RPA1/TRA2B/EZH2/RBBP7/CCNE1/HELLS/TBRG4/PSIP1/CHEK1/PLK1/MSH2/NUP153/NBN/SMC3/PDS5B/NUP107/WEE1/XRCC6/PRDX4/NUP205/CTCF/AK2/CHEK2/BUB1B/USP1/MXD3/TUBG1/LIG1/MLH1/DIAPH3/CNOT9/POLD3/HMGB3/SMC1A/GSPT1/TIMELESS/NCAPD2/MTHFD2/RANBP1/LBR/POLD1/DSCC1/CDC25A/SNRPB/TOP2A/DNMT1/TMPO/IPO7/AURKB/DUT/RAN/KPNA2/TK1/STMN1/SLBP/XPO1/MAD2L1/UNG/LMNB1/…
MTORC1_SIGNALING	MTORC1_SIGNALING	197	-0.68522	-2.50685	6.05737e-24	1.00956e-22	4.46332e-23	2316	tags=52%, list=14%, signal=45%	SLC9A3R1/NUFIP1/PSMA3/SEC11A/EEF1E1/CORO1A/SSR1/POLR3G/ALDOA/PSMA4/USO1/NMT1/SDF2L1/SLC1A4/XBP1/UBE2D3/PSMC4/ERO1A/ACSL3/SORD/RPA1/PSMG1/RRP9/GSR/PNO1/CYB5B/SERP1/CCNF/PLK1/HSPA9/LTA4H/SLC37A4/GGA2/ACTR3/TCEA1/NUP205/NAMPT/CACYBP/ATP5MC1/HSPA4/LDLR/TUBG1/CALR/BHLHE40/DHCR7/ELOVL5/SLC1A5/FADS2/DHCR24/HMBS/MTHFD2/IMMT/PDAP1/PGM1/HPRT1/PSME3/TMEM97/HSPE1/INSIG1/CDC25A/MLLT11/SQLE/SLC6A6/TXNRD1/CTSC/…
G2M_CHECKPOINT	G2M_CHECKPOINT	195	-0.672054	-2.4647	9.17756e-22	1.14719e-20	5.07181e-21	2048	tags=46%, list=13%, signal=41%	KIF11/MKI67/NOTCH2/EFNA5/DTYMK/WRN/CKS1B/UBE2C/BIRC5/TOP1/TRA2B/MEIS2/EZH2/CENPF/E2F2/E2F3/DBF4/MTF2/CCNF/CHEK1/PLK1/CUL4A/KIF15/SRSF10/PDS5B/TFDP1/CTCF/MEIS1/CUL1/SNRPD1/EXO1/CCNA2/MAP3K20/CHAF1A/ABL1/GINS2/CDC45/HMGB3/AMD1/SMC1A/GSPT1/SLC7A1/E2F1/LBR/HMGN2/RAD23B/EWSR1/KPNB1/CDC25A/RBM14/TOP2A/SQLE/TMPO/AURKB/KPNA2/STMN1/DKC1/XPO1/MAD2L1/HSPA8/LMNB1/LIG3/CDC6/SLC7A5/UCK2/G3BP1/CDK4/ILF3/HNRNPD/…
MYC_TARGETS_V2	MYC_TARGETS_V2	58	-0.786006	-2.47259	9.11221e-14	9.11221e-13	4.02856e-13	2458	tags=76%, list=15%, signal=65%	NDUFAF4/DDX18/TCOF1/PLK4/PUS1/BYSL/NOP16/AIMP2/SLC19A1/NOP56/SORD/MRTO4/RRP9/PES1/TBRG4/SLC29A2/PLK1/RRP12/RABEPK/PHB/EXOSC5/GRWD1/WDR43/UTP20/RCL1/IMP4/LAS1L/TMEM97/HSPE1/CBX3/MYBBP1A/UNG/SRM/GNL3/PPRC1/CDK4/DCTPP1/MCM4/PA2G4/MCM5/NOLC1/HSPD1/NPM1/HK2
P53_PATHWAY	P53_PATHWAY	187	0.493936	2.05617	1.14976e-09	9.58135e-09	4.23597e-09	2555	tags=40%, list=16%, signal=34%	HEXIM1/PIDD1/GADD45A/ZMAT3/PLXNB2/PTPRE/MDM2/CDKN1A/RAD9A/ATF3/PPP1R15A/PHLDA3/FDXR/DDB2/TSPYL2/VWA5A/HSPA4L/DRAM1/BLCAP/NDRG1/PLK3/TOB1/CYFIP2/PPM1D/CSRNP2/POLH/DDIT3/TP53/PLK2/RPS27L/PRKAB1/SESN1/XPC/FOS/BAX/SLC3A2/IER5/KIF13B/BTG2/CCP110/ABAT/HBEGF/NHLH2/UPP1/CDKN2AIP/RETSAT/TRIAP1/ANKRA2/FAS/ISCU/SLC35D1/ABHD4/BAK1/IRAK1/TCN2/POM121/OSGIN1/EPS8L2/EPHA2/BTG1/RNF19B/TGFA/MXD4/MXD1/SAT1/KLF4/ERC…
OXIDATIVE_PHOSPHORYLATION	OXIDATIVE_PHOSPHORYLATION	197	-0.531799	-1.94557	3.96986e-09	2.83561e-08	1.25364e-08	3925	tags=53%, list=24%, signal=41%	FXN/MRPS12/UQCRQ/IDH3G/SLC25A11/ATP5F1E/CYC1/TIMM10/DECR1/UQCRB/NDUFS8/ETFA/ATP6V0E1/ATP6V1C1/ETFDH/GRPEL1/ATP5MG/MPC1/UQCRFS1/SDHA/DLAT/COX6A1/COX8A/POLR2F/MGST3/CPT1A/COX6B1/ATP5PB/GPX4/NDUFA4/MRPL35/NNT/NDUFS6/DLST/NDUFB6/UQCRC2/NDUFB7/TIMM50/NDUFB8/TOMM22/TOMM70/NDUFS4/MRPS30/FDX1/ATP6V1F/DLD/VDAC2/ACO2/ATP5F1C/NDUFV2/VDAC3/COX6C/NDUFS1/ATP5MF/UQCRC1/TIMM9/TIMM13/ATP5PO/COX7B/MRPS15/HSD17B10/…
GLYCOLYSIS	GLYCOLYSIS	196	-0.506397	-1.85509	3.50655e-07	2.19159e-06	9.68915e-07	2006	tags=25%, list=12%, signal=22%	ENO2/HAX1/MDH1/PSMC4/POLR3K/ERO1A/CASP6/TALDO1/ARPP19/CYB5A/MXI1/PGM2/TXN/SLC37A4/GALK1/GNPDA1/SOD1/RRAGD/EGFR/SDC1/PGLS/PKM/HDLBP/DPYSL4/GOT2/VEGFA/AKR1A1/MDH2/IDH1/ME2/STMN1/SLC25A13/PRPS1/PGK1/DDIT4/FAM162A/PGAM1/TPI1/B4GALT2/CLN6/ALDH7A1/AK4/FKBP4/PPIA/NASP/PFKP/ENO1/LDHA/HK2
MYOGENESIS	MYOGENESIS	173	0.422857	1.75877	1.11641e-05	6.2023e-05	2.74207e-05	2766	tags=33%, list=17%, signal=28%	NAV2/PLXNB2/ENO3/DMPK/CDKN1A/SMTN/TSC2/ATP6AP1/MEF2A/GPX3/ACHE/SPTAN1/AEBP1/AGRN/BAG1/COL6A2/MYH9/PRNP/HDAC5/SPEG/GSN/PDLIM7/EIF4A2/MYH7/PICK1/ITGA7/HBEGF/MAPRE3/FLII/IFRD1/SPARC/TNNT2/COL3A1/RYR1/IGFBP3/ATP2A1/KIFC3/ADAM12/GADD45B/MYOM1/MRAS/CLU/TPM2/VIPR1/SLC6A8/SH2B1/KLF5/NOTCH1/AK1/RB1/PDE4DIP/EPHB3/MEF2D/OCEL1/CRAT/LDB3/MYO1C
FATTY_ACID_METABOLISM	FATTY_ACID_METABOLISM	139	-0.497844	-1.76865	1.88219e-05	8.7826e-05	3.88283e-05	2427	tags=33%, list=15%, signal=28%	AADAT/DLD/ACO2/HSPH1/ALDOA/BPHL/ENO2/HSD17B10/BLVRA/MDH1/SUCLG1/ECI1/ACADM/ACSS1/PDHB/RAP1GDS1/PCBD1/GRHPR/ACSL4/NBN/FH/ADSL/GSTZ1/BCKDHB/YWHAH/PDHA1/ELOVL5/ACAT2/CPOX/NTHL1/DHCR24/GLUL/ERP29/HSD17B4/PRDX6/ACSL1/MDH2/IDH1/APEX1/HMGCS1/SMS/HSP90AA1/HADH/ODC1/LDHA/FASN
HYPOXIA	HYPOXIA	187	-0.466263	-1.69933	1.93217e-05	8.7826e-05	3.88283e-05	2300	tags=29%, list=14%, signal=25%	SDC2/ILVBL/PLAUR/ALDOA/ATP7A/WSB1/ENO2/SIAH2/ERO1A/PFKFB3/TPD52/CASP6/SLC25A1/CSRP2/ALDOC/GRHPR/TPST2/NEDD4L/MXI1/XPNPEP1/PGM2/NDST1/SLC37A4/GALK1/CA12/LOX/BHLHE40/RRAGD/BCL2/EGFR/HDLBP/BNIP3L/DPYSL4/PGM1/VEGFA/PIM1/HK1/SLC6A6/ETS1/KLF7/PGK1/DDIT4/FAM162A/TPI1/SLC2A1/AK4/PFKP/GPI/GAPDH/ENO1/LDHA/HK2/SCARB1/PDK1
UNFOLDED_PROTEIN_RESPONSE	UNFOLDED_PROTEIN_RESPONSE	110	-0.524649	-1.81277	2.17243e-05	9.0518e-05	4.00185e-05	2275	tags=40%, list=14%, signal=35%	SEC11A/EIF4E/SSR1/SPCS3/SLC1A4/XBP1/EXOSC9/ERO1A/NOP56/PAIP1/CKS1B/PDIA5/KHSRP/MTREX/RRP9/SEC31A/TUBB2A/SERP1/HSPA9/CHAC1/LSM4/EXOSC5/FUS/NOP14/EIF4G1/DDX10/BANF1/CALR/PDIA6/NFYA/XPOT/MTHFD2/VEGFA/DKC1/SLC7A5/NHP2/DDIT4/ALDH18A1/RPS14/EEF2/NOLC1/EIF4EBP1/NPM1/PSAT1
APOPTOSIS	APOPTOSIS	145	0.439296	1.76034	2.68344e-05	0.000103209	4.56294e-05	1966	tags=30%, list=12%, signal=26%	LMNA/TIMP2/GADD45A/PLAT/DIABLO/CDKN1A/ATF3/FDXR/GPX3/SPTAN1/DDIT3/CDKN1B/BAX/PEA15/PPP2R5B/PMAIP1/GSN/DNAJC3/BTG2/GCH1/MADD/SQSTM1/IRF1/RNASEL/CFLAR/CASP3/RHOT2/CCNA1/DAP/RETSAT/CYLD/TNFRSF12A/FAS/CDC25B/RARA/ERBB2/CREBBP/GADD45B/CASP8/CLU/NEDD9/EMP1/DNAJA1
TNFA_SIGNALING_VIA_NFKB	TNFA_SIGNALING_VIA_NFKB	176	0.391324	1.62116	0.000194286	0.00069388	0.000306768	2457	tags=28%, list=15%, signal=24%	GADD45A/DUSP4/PTPRE/CDKN1A/ATF3/PPP1R15A/DRAM1/PHLDA1/IRS2/PLK2/JAG1/KLF10/NFAT5/FOS/ID2/IER2/DDX58/IER5/BTG2/GCH1/KLF6/SQSTM1/HBEGF/IRF1/CFLAR/IL6ST/NR4A3/ATP2B1/SGK1/ETS2/NFKBIE/SDC4/GADD45B/STAT5A/TRAF1/SERPINB8/CCNL1/BTG1/TIPARP/RNF19B/DUSP1/FOSL1/MXD1/SAT1/KLF4/DUSP2/LAMB3/GEM/NINJ1
ANDROGEN_RESPONSE	ANDROGEN_RESPONSE	96	-0.507155	-1.72931	0.000970061	0.00323354	0.00142956	3252	tags=41%, list=20%, signal=33%	TSC22D1/ACTN1/ADAMTS1/GPD1L/TNFAIP8/IDI1/AKAP12/PGM3/GUCY1A1/VAPA/UAP1/CCND1/SPCS3/UBE2I/ACSL3/AKT1/TPD52/SORD/STK39/DBI/GSR/ABCC4/RRP12/XRCC6/RPS6KA3/PMEPA1/ELOVL5/ZMIZ1/DHCR24/INSIG1/CAMKK2/HMGCR/FKBP5/HMGCS1/SMS/PA2G4/FADS1/XRCC5/SCD
PEROXISOME	PEROXISOME	96	-0.505195	-1.72263	0.0010715	0.00334845	0.00148037	1610	tags=42%, list=10%, signal=38%	HSD17B11/RDH11/LONP2/PEX13/CAT/IDI1/ABCD3/SEMA3C/SIAH1/SLC23A2/ABCC5/PEX5/PEX2/HSD11B2/FABP6/MSH2/SOD2/ACSL4/CTBP1/YWHAH/SOD1/ELOVL5/TSPO/DHCR24/GNPAT/HSD17B4/TOP2A/ACSL1/ISOC1/ITGB1BP1/IDH1/PRDX1/IDH2/FDPS/PABPC1/CLN6/CNBP/FADS1/CTPS1/SMARCC1
CHOLESTEROL_HOMEOSTASIS	CHOLESTEROL_HOMEOSTASIS	70	-0.519339	-1.68758	0.00176313	0.00518566	0.00229261	2512	tags=37%, list=15%, signal=32%	ATXN2/LPL/CYP51A1/ALCAM/PLAUR/ETHE1/LSS/GNAI1/ALDOC/FABP5/ACSS2/GLDC/SREBF2/LDLR/DHCR7/ACAT2/FADS2/TMEM97/SQLE/FDFT1/CBS/HMGCR/HMGCS1/FDPS/SCD/FASN
COAGULATION	COAGULATION	109	0.400506	1.55763	0.00191002	0.0053056	0.00234564	3201	tags=28%, list=20%, signal=23%	PLAT/THBS1/CTSV/MST1/LRP1/DUSP6/WDR1/FBN1/GSN/CRIP2/SPARC/CTSB/CAPN5/ISCU/PRSS23/CSRP1/ITGA2/CLU/USP11/TFPI2/APOC1/GP1BA/TIMP3/MMP3/F2RL2/ANXA1/S100A13/S100A1/FURIN/CTSH/SERPING1
IL6_JAK_STAT3_SIGNALING	IL6_JAK_STAT3_SIGNALING	67	0.449564	1.62185	0.00303188	0.00797863	0.0035274	4074	tags=34%, list=25%, signal=26%	STAT3/STAT1/TYK2/STAT2/LEPR/IRF1/IL6ST/TNFRSF12A/FAS/BAK1/OSMR/IL13RA1/IFNAR1/TNFRSF1A/TNFRSF21/IRF9/CD44/HMOX1/PDGFC/SOCS1/SOCS3/IL17RA/CSF1
EPITHELIAL_MESENCHYMAL_TRANSITION	EPITHELIAL_MESENCHYMAL_TRANSITION	189	0.330283	1.37383	0.00643271	0.0160818	0.00710984	2206	tags=24%, list=14%, signal=21%	SLIT3/FLNA/GADD45A/SCG2/IGFBP4/TPM1/SGCB/THBS1/ITGAV/ACTA2/EFEMP2/COL6A2/LRP1/FBN1/ID2/COL7A1/COL5A1/VCAN/SFRP1/APLP1/COL11A1/SPARC/COL4A1/TNFRSF12A/FAS/COL3A1/IGFBP3/LAMA3/WIPF1/FSTL1/COL5A2/SDC4/ADAM12/BDNF/GADD45B/ANPEP/ITGA2/NT5E/COL16A1/TPM2/TGFBI/SLC6A8/SERPINH1/TFPI2/FBLN2/SAT1
ADIPOGENESIS	ADIPOGENESIS	188	-0.384811	-1.40513	0.0108509	0.0258355	0.011422	3393	tags=36%, list=21%, signal=29%	ATL2/PEMT/FZD4/ITSN1/GRPEL1/GPHN/ENPP2/JAGN1/DLAT/COX6A1/COX8A/MGST3/DHRS7/CAT/SLC25A10/GPX4/PPARG/NDUFB7/ALDH2/PFKL/LPL/DLD/ACO2/ALDOA/NMT1/UQCRC1/ATP5PO/COX7B/COQ3/PDCD4/SUCLG1/UBQLN1/VEGFB/AIFM1/ARAF/ACADM/SLC19A1/PFKFB3/LPCAT3/SLC25A1/TALDO1/MRPL15/G3BP2/PTCD3/GPAM/AGPAT3/AK2/SLC5A6/UBC/SOD1/FAH/MTCH2/DHCR7/YWHAG/SLC1A5/IMMT/PGM1/PRDX3/CS/MDH2/IDH1/ELOVL6/HADH/ESYT1/ACLY/TKT/SCARB1
ESTROGEN_RESPONSE_EARLY	ESTROGEN_RESPONSE_EARLY	182	-0.381558	-1.38717	0.0140499	0.0319317	0.0141172	2205	tags=25%, list=14%, signal=22%	NCOR2/ADCY9/AFF1/CCND1/SLC1A4/IL17RB/SIAH2/HR/XBP1/MPPED2/ASB13/SLC1A1/GREB1/UGCG/TSKU/RRP12/NXT1/PPIF/OLFM1/ELOVL2/ABCA3/CA12/TIAM1/BHLHE40/RBBP8/BCL2/SLC16A1/DHCR7/IGF1R/ELOVL5/RHOBTB3/MYBBP1A/RPS6KA2/FDFT1/TBC1D30/TGIF2/FKBP5/SLC7A5/ABLIM1/AKAP1/FARP1/TUBB2B/SLC2A1/FKBP4/SCARB1/FASN
REACTIVE_OXYGEN_SPECIES_PATHWAY	REACTIVE_OXYGEN_SPECIES_PATHWAY	48	-0.499043	-1.52345	0.015864	0.0344869	0.0152468	2957	tags=62%, list=18%, signal=51%	SRXN1/PTPA/LAMTOR5/ABCC1/EGLN2/GLRX2/SCAF4/STK25/OXSR1/LSP1/CAT/GPX4/FES/GCLC/HHEX/GCLM/GSR/NDUFB4/SOD2/MGST1/TXN/PRDX4/PRDX2/SOD1/NDUFS2/PRDX6/TXNRD1/FTL/PRDX1/PFKP
ESTROGEN_RESPONSE_LATE	ESTROGEN_RESPONSE_LATE	177	-0.382319	-1.39104	0.0166981	0.0347877	0.0153798	2587	tags=28%, list=16%, signal=24%	PAPSS2/AMFR/ARL3/RNASEH2A/SLC9A3R1/PLK4/NCOR2/KIF20A/AFF1/CCND1/COX6C/SLC1A4/PDCD4/IL17RB/SIAH2/HR/XBP1/CKB/SORD/DNAJC12/SLC29A1/FABP5/NXT1/PPIF/TH/OLFM1/ABCA3/CA12/TIAM1/IMPA2/RBBP8/BCL2/SLC16A1/DHCR7/ELOVL5/GINS2/HPRT1/TOP2A/RPS6KA2/FDFT1/ASS1/MDK/FKBP5/CDC6/IDH2/SLC7A5/FARP1/FKBP4/SCARB1
