# Supplementary material for: RUVBL1 and RUVBL2 as novel druggable DNA Damage Response regulators in the N-Myc regulatory network in neuroblastoma
Source: Research Square preprint supplement (doi:10.21203/rs.3.rs-3206227/v1), 2023-11-20
Supplement: Supplementary file 6 [file f32b01a516293a4d6aebcedb.xlsx]

## Sheet: legend
Tab name contains information on the main or supplementary Figure (Fig) to which the source data applies

## Sheet: Fig_S5a_HALLMARK_GSEA
ID	Description	setSize	enrichmentScore	NES	pvalue	p.adjust	qvalues	rank	leading_edge	core_enrichment
MYC_TARGETS_V1	MYC_TARGETS_V1	186	0.758308	3.60629	1.19461e-57	5.97304e-56	1.63473e-56	2448	tags=81%, list=18%, signal=68%	NHP2/RUVBL2/MCM2/APEX1/POLE3/RRP9/SNRPA/NME1/FBL/MRPL23/IMPDH2/SNRPD2/PHB2/ODC1/POLD2/PRDX4/RFC4/RANBP1/AIMP2/MAD2L1/SNRPD1/HNRNPC/CCT7/NOP16/MCM4/HNRNPD/CCT3/LSM7/TRIM28/NDUFAB1/MCM5/MCM6/PCNA/TYMS/CCNA2/GOT2/LSM2/CLNS1A/RPS5/EXOSC7/HDGF/PSMD8/PGK1/SF3B3/COX5A/TUFM/RAN/RRM1/SET/PA2G4/CDC45/TRA2B/CNBP/ERH/SSBP1/CDK2/NCBP2/PSMC4/CCT5/SNRPG/PHB/LDHA/MRPL9/NPM1/CYC1/GSPT1/RSL1D1/CDK4/SMARCC1/RPS3/EI…
E2F_TARGETS	E2F_TARGETS	188	0.736384	3.50464	1.26737e-53	3.16843e-52	8.67149e-53	2477	tags=76%, list=18%, signal=63%	DCTPP1/UNG/MCM2/PAICS/CKS2/RNASEH2A/SNRPB/TRIP13/UBE2S/NME1/SSRP1/HMGB3/DDX39A/POLD2/PRDX4/POLA2/KIF4A/HMGA1/RANBP1/DSCC1/CHEK1/MAD2L1/CHEK2/UBE2T/AURKA/MCM3/CDC25A/CDKN3/MCM4/HNRNPD/CCNB2/MCM5/PRIM2/MCM6/SPC25/PLK1/PCNA/TIPIN/PTTG1/BIRC5/MTHFD2/TACC3/POP7/KIF22/PRPS1/CENPM/MYBL2/RAN/DLGAP5/POLD1/PA2G4/CDK1/SPC24/TRA2B/BUB1B/SLBP/MELK/AURKB/TIMELESS/CENPE/RRM2/RFC3/TK1/NCAPD2/CCNE1/CKS1B/GSPT1/PR…
G2M_CHECKPOINT	G2M_CHECKPOINT	181	0.665935	3.15622	8.51637e-35	1.4194e-33	3.88466e-34	1984	tags=56%, list=14%, signal=48%	PRMT5/MCM2/CKS2/UBE2S/HMGB3/DDX39A/ODC1/POLA2/KIF4A/HMGA1/CHEK1/MAD2L1/EXO1/AURKA/SNRPD1/GINS2/UBE2C/MCM3/TPX2/CDC25A/CDKN3/CHAF1A/HNRNPD/CCNB2/MCM5/PRIM2/MCM6/PLK1/CENPA/PTTG1/E2F3/CCNA2/BIRC5/TACC3/KIF22/PTTG3P/MYBL2/E2F1/CDC45/CDK1/TRA2B/SAP30/CENPF/KIF15/AURKB/CENPE/BUB1/FBXO5/CDC6/KIF11/CKS1B/GSPT1/CDK4/PBK/SMARCC1/DTYMK/KIF23/SUV39H1/SMC4/CDC20/NUSAP1/SQLE/NCL/HMMR/NEK2/NDC80/MKI67/PLK4/KIF…
TNFA_SIGNALING_VIA_NFKB	TNFA_SIGNALING_VIA_NFKB	184	-0.545108	-2.92182	3.21509e-23	4.01887e-22	1.0999e-22	3894	tags=60%, list=28%, signal=44%	LITAF/KYNU/PDLIM5/TNFAIP8/MARCKS/REL/RCAN1/DNAJB4/MXD1/NR4A3/SIK1/PLK2/CCRL2/PTGS2/JUNB/VEGFA/SLC2A3/NFKB1/TSC22D1/SLC2A6/CEBPD/MCL1/TRIP10/PPP1R15A/MAP2K3/KDM6B/IER3/TANK/GADD45B/SDC4/SOD2/CXCL2/EGR1/ETS2/RELB/MSC/IL15RA/CD83/PMEPA1/FOSB/ATF3/PLAU/BIRC2/TUBB2A/EGR2/F3/GEM/TNFRSF9/NR4A1/DRAM1/DDX58/TAP1/TNF/CCL4/MYC/NR4A2/STAT5A/CSF1/NFKBIA/MAP3K8/B4GALT1/SAT1/JUN/KLF4/TLR2/BHLHE40/HES1/ABCA1/PLE…
OXIDATIVE_PHOSPHORYLATION	OXIDATIVE_PHOSPHORYLATION	181	0.590833	2.80027	7.97989e-23	7.97989e-22	2.18397e-22	2745	tags=57%, list=20%, signal=46%	TOMM22/MRPL11/PHB2/IDH2/HSD17B10/SLC25A5/MRPS12/NDUFAB1/UQCRFS1/TIMM9/MRPL15/GOT2/TIMM13/LDHB/COX6B1/TIMM50/COX5A/POLR2F/MDH2/MRPS30/COX8A/TIMM10/GRPEL1/LDHA/CYC1/SLC25A6/COX7B/NDUFA7/PDHA1/NDUFS6/NDUFB5/UQCRC1/UQCRQ/NDUFB6/MRPS11/NDUFA8/MRPS22/SLC25A3/COX7C/CS/NDUFA1/NDUFA3/BCKDHA/NDUFA2/OXA1L/MRPL34/ETFA/NDUFB7/NDUFB4/NDUFS3/VDAC2/PMPCA/HADHA/NDUFB1/NDUFS7/COX5B/BAX/TIMM8B/LRPPRC/COX7A2L/AIFM1/…
MYC_TARGETS_V2	MYC_TARGETS_V2	55	0.789437	3.14559	5.79458e-21	4.82882e-20	1.32157e-20	2114	tags=87%, list=15%, signal=74%	DCTPP1/EXOSC5/UNG/BYSL/RRP9/WDR74/IPO4/TMEM97/AIMP2/PES1/FARSA/NOP16/MCM4/MCM5/PLK1/NIP7/PA2G4/PHB/NPM1/CDK4/GRWD1/HSPD1/HSPE1/RCL1/HK2/GNL3/IMP4/PRMT3/PLK4/PPRC1/NOLC1/WDR43/RABEPK/TFB2M/SRM/NDUFAF4/RRP12/UTP20/SLC29A2/TBRG4/DDX18/CBX3/TCOF1/PUS1/NOP2/SORD/SUPV3L1/MRTO4
DNA_REPAIR	DNA_REPAIR	134	0.601895	2.72461	2.09449e-18	1.49606e-17	4.09449e-18	2780	tags=57%, list=20%, signal=46%	FEN1/POLR2H/NME4/NME1/SSRP1/IMPDH2/POLA2/RFC4/ALYREF/PCNA/TYMS/UMPS/POLR2I/RAD51/POLA1/SAC3D1/POLR2F/POLD1/NCBP2/GTF2F1/RFC3/SEC61A1/TP53/POLR2D/PRIM1/CLP1/DUT/TAF10/POLR2C/DGUOK/RFC2/ZWINT/DAD1/BOLA2/GTF2A2/APRT/LIG1/POLR2E/POLR1C/RPA3/SUPT4H1/DDB2/POLR2G/MRPL40/POLR1D/POLE4/EDF1/BCAP31/RAE1/DDB1/ERCC1/MPG/AAAS/SURF1/BRF2/ADRM1/RFC5/CSTF3/POLD3/COX17/HPRT1/TSG101/ERCC2/UPF3B/RBX1/NUDT9/GMPR2/PNP…
MTORC1_SIGNALING	MTORC1_SIGNALING	188	0.522571	2.48705	1.10078e-16	6.8799e-16	1.88292e-16	2868	tags=46%, list=21%, signal=37%	UNG/MCM2/RRP9/GMPS/PSMB5/DDX39A/TMEM97/AURKA/CDC25A/TOMM40/PSMG1/MCM4/SLC1A5/PLK1/DHFR/MTHFD2/PSAT1/STIP1/PGK1/EBP/ENO1/PSMC4/RRM2/PHGDH/BUB1/GAPDH/LDHA/ELOVL6/HSPD1/SQLE/HSPE1/HK2/TPI1/PSMD13/EEF1E1/UBE2D3/RPN1/CCNF/PSMA3/SHMT2/PDK1/PNO1/PPIA/PPA1/CACYBP/EIF2S2/DHCR7/SCD/ABCF2/PSMA4/HMBS/CCT6A/G6PD/ETF1/HSPA4/FADS2/CYB5B/SLC7A5/SLC37A4/HSPA9/MTHFD2L/GSR/SORD/CCNG1/HPRT1/ARPC5L/PSME3/TM7SF2/TFRC/…
INTERFERON_GAMMA_RESPONSE	INTERFERON_GAMMA_RESPONSE	187	-0.476367	-2.56647	1.21668e-15	6.75933e-15	1.84992e-15	4559	tags=65%, list=33%, signal=44%	IFI35/IFI44L/CXCL10/TRIM21/IRF4/HELZ2/IFIT3/IRF7/PLSCR1/ARL4A/IFITM3/VAMP5/STAT1/SOCS1/SOCS3/OAS2/CXCL9/IRF5/LYSMD2/SAMHD1/ZNFX1/BST2/SLC25A28/RTP4/CD86/MVP/IFI44/PTGS2/IFITM2/SELP/NFKB1/CD38/PTPN6/IDO1/CD40/PELI1/HLA-G/CASP7/ARID5B/IRF2/PSMB9/VAMP8/NMI/RBCK1/AUTS2/SOD2/NCOA3/IL15RA/ITGB7/PSMB8/FAS/ADAR/HLA-DQA1/IL15/SP110/PLA2G4A/IRF9/GZMA/DDX58/TAP1/CASP8/CSF2RB/NFKBIA/IL4R/SLAMF7/CMKLR1/CASP4/…
INFLAMMATORY_RESPONSE	INFLAMMATORY_RESPONSE	167	-0.481088	-2.57385	2.00586e-15	1.00293e-14	2.74486e-15	3682	tags=54%, list=27%, signal=40%	IRAK2/LPAR1/CXCL9/BST2/TLR3/SELE/IL10/MXD1/RTP4/CXCR6/CCRL2/GNA15/NFKB1/ABI1/SELL/CD40/SLAMF1/SLC31A1/SLC11A2/IL1R1/LAMP3/NMI/HRH1/IL15RA/CD14/MMP14/ACVR1B/TNFSF15/IL15/CX3CL1/GP1BA/F3/TLR1/CALCRL/TNFRSF9/NOD2/LCK/CCR7/PCDH7/MYC/C3AR1/CSF1/NFKBIA/IL4R/OSMR/SLC31A2/CMKLR1/TLR2/RGS16/ACVR2A/ABCA1/PTPRE/IFNAR1/IL18RAP/BTG2/CD48/IL18R1/RASGRP1/ICAM1/CD69/IRF1/IL2RB/TNFSF10/APLNR/SEMA4D/HBEGF/CCL2/GCH…
COMPLEMENT	COMPLEMENT	174	-0.433141	-2.31311	5.56862e-12	2.53119e-11	6.92747e-12	5006	tags=64%, list=37%, signal=41%	LYN/C2/PCSK9/USP8/LGMN/GZMB/CFB/CDK5R1/CTSB/CASP5/OLR1/ANG/CDH13/GNB4/C1QC/IRF7/VCPIP1/PLSCR1/RCE1/CD40LG/DUSP5/GCA/F8/FCER1G/KYNU/C1QA/ANXA5/COL4A2/ADAM9/SERPINA1/L3MBTL4/PHEX/CR1/LAMP2/CTSC/APOBEC3F/LIPA/FCN1/BRPF3/TIMP2/CASP7/AKAP10/S100A13/IRF2/CA2/DPP4/PSMB9/ERAP2/WAS/LGALS3/F5/MMP14/CD59/DUSP6/MMP15/PRCP/GP1BA/STX4/PLA2G4A/F3/GZMA/LCK/DOCK10/KCNIP2/APOC1/ITGAM/C3/GZMK/CD46/CASP9/NOTCH4/PLA2…
MYOGENESIS	MYOGENESIS	152	-0.436609	-2.30005	9.28723e-11	3.86968e-10	1.05907e-10	3402	tags=45%, list=25%, signal=34%	DMD/TGFB1/COX7A1/AEBP1/MEF2D/COL3A1/GJA5/CRAT/CASQ1/ITGB5/GADD45B/APOD/SPARC/APP/PDLIM7/HSPB8/NCAM1/LSP1/MEF2A/FXYD1/GPX3/PYGM/IGF1/PPFIA4/ITGB4/WWTR1/BDKRB2/CRYAB/COL6A3/NOTCH1/DMPK/GAA/EPHB3/BHLHE40/MYH9/SORBS3/PKIA/IFRD1/IGFBP7/SORBS1/GNAO1/APLNR/HBEGF/COL15A1/LAMA2/ACHE/AGRN/HDAC5/SVIL/ERBB3/MEF2C/CLU/RIT1/GSN/MYLK/SSPN/DAPK2/KLF5/REEP1/FABP3/MYO1C/PDE4DIP/ITGA7/SGCD/SPTAN1/CAMK2B/FLII/SPEG
KRAS_SIGNALING_UP	KRAS_SIGNALING_UP	172	-0.4207	-2.2469	1.67384e-10	6.43787e-10	1.76194e-10	4671	tags=56%, list=34%, signal=38%	GPRC5B/PRRX1/SCN1B/GFPT2/SATB1/CXCL10/GNG11/ITGA2/ITGBL1/BTC/DNMBP/ANKH/MPZL2/MALL/SDCCAG8/IL1B/ABCB1/ALDH1A3/FCER1G/NAP1L2/MAP4K1/LY96/PLVAP/TFPI/PTGS2/TLR8/PEG3/VWA5A/MTMR10/PPP1R15A/NIN/CA2/FLT4/APOD/CD37/ADAM8/MMP9/PSMB8/PECAM1/PLAU/DUSP6/SNAP91/LAPTM5/SPARCL1/PTBP2/ENG/ACE/SNAP25/C3AR1/CPE/TMEM176A/KLF4/IL2RG/CMKLR1/RGS16/EMP1/CFH/JUP/TRAF1/ADAMDEC1/BTBD3/PRDM1/IL33/DOCK2/HBEGF/ITGB2/LAT2/KI…
UNFOLDED_PROTEIN_RESPONSE	UNFOLDED_PROTEIN_RESPONSE	102	0.533567	2.32144	6.14063e-10	2.19308e-09	6.00212e-10	2810	tags=49%, list=21%, signal=39%	NHP2/EXOSC5/LSM4/EIF4EBP1/RRP9/BANF1/ALDH18A1/SRPRB/MTHFD2/PSAT1/EXOSC9/EIF4G1/EXOSC4/EXOSC2/NOP14/NPM1/CKS1B/EIF2S1/YIF1A/SPCS1/IMP3/DDX10/NOLC1/RPS14/PDIA6/EIF4E/EEF2/POP4/LSM1/XPOT/EXOSC1/CEBPG/NFYA/FUS/GEMIN4/SLC7A5/HSPA9/SDAD1/PAIP1/TATDN2/SERP1/CALR/SPCS3/ASNS/EIF4A3/NFYB/KHSRP/ATF6/HSP90B1/HSPA5
UV_RESPONSE_DN	UV_RESPONSE_DN	136	-0.43667	-2.23876	9.51821e-10	3.17274e-09	8.68328e-10	4499	tags=54%, list=33%, signal=36%	MAP1B/RUNX1/COL5A2/DDAH1/AGGF1/RBPMS/FHL2/CITED2/RASA2/LPAR1/PDLIM5/RND3/ADD3/MAPK14/PRKAR2B/CAP2/SCN8A/TFPI/LAMC1/ZMIZ1/COL1A2/NFKB1/COL3A1/RXRA/PEX14/SNAI2/IRS1/CAV1/TJP1/ARHGEF9/IGF1R/ATRN/ERBB2/F3/ANXA4/SDC2/MGLL/MYC/IGFBP5/PDGFRB/BHLHE40/ACVR2A/DUSP1/DLG1/AMPH/FYN/CDK13/NOTCH2/PIAS3/FBLN5/MAGI2/PRKCE/CDC42BPA/DAB2/INPP4B/NEK7/KCNMA1/ANXA2/SYNE1/PTPRM/NRP1/CELF2/TGFBR3/WDR37/TGFBR2/SYNJ2/DLC1…
ALLOGRAFT_REJECTION	ALLOGRAFT_REJECTION	172	-0.408768	-2.18317	1.34101e-09	4.19066e-09	1.14692e-09	3827	tags=58%, list=28%, signal=42%	TRAT1/CXCL9/BCL10/CRTAM/IL12RB1/TLR3/MAP4K1/CD8B/IL10/CAPG/CD86/TGFB1/SRGN/ABI1/PTPN6/CD40/HLA-G/CD7/CCR2/CD1D/SPI1/EGFR/TAP2/HLA-DOB/CD247/CD3D/LY86/NCF4/CXCR3/MMP9/WAS/FAS/ELF4/HLA-DQA1/TLR6/IL15/CD3E/GPR65/FGR/CD3G/TLR1/GZMA/LCK/TAP1/TNF/CCL4/CCR5/SOCS5/CSF1/IL4R/LTB/IL2RG/TLR2/ACVR2A/B2M/IL18RAP/HLA-A/IL16/CD96/STAT4/ICAM1/IGSF6/EIF4G3/ITGAL/IL2RB/CD4/HLA-DOA/ZAP70/ITGB2/IL7/CCL2/HLA-DMA/CD2/…
COAGULATION	COAGULATION	109	-0.460351	-2.28756	5.83504e-09	1.71619e-08	4.69694e-09	3898	tags=53%, list=28%, signal=38%	HTRA1/KLF7/C1QA/PEF1/ADAM9/F2RL2/SERPINA1/CAPN2/FBN1/VWF/LAMP2/CTSE/CFI/CRIP2/S100A13/P2RY1/DPP4/SPARC/MST1/MMP9/MMP14/PECAM1/PLAU/DUSP6/MMP15/GP1BA/F3/THBD/APOC1/CAPN5/C3/CASP9/ISCU/PLEK/CFH/C1R/PROS1/CSRP1/FYN/TIMP3/LRP1/PLAT/CPQ/BMP1/TF/PDGFB/GNG12/CTSO/CTSH/CLU/GSN/ANXA1/C1S/KLKB1/CD9/A2M/MASP2/CTSK
EPITHELIAL_MESENCHYMAL_TRANSITION	EPITHELIAL_MESENCHYMAL_TRANSITION	190	-0.381221	-2.06682	9.8886e-09	2.74683e-08	7.51765e-09	5172	tags=61%, list=38%, signal=39%	GJA1/COPA/SFRP4/ANPEP/THY1/FAP/COL1A1/FBN2/ITGB3/FLNA/ITGA5/MAGEE1/COL8A2/MXRA5/ITGB1/BASP1/MATN3/COL5A1/PRRX1/OXTR/FMOD/EMP3/COL5A2/ITGA2/ENO2/GPC1/FSTL1/MGP/MYL9/PTHLH/COL6A2/VEGFC/HTRA1/THBS2/COL4A2/LUM/ELN/FBN1/DCN/CAPG/CAP2/GLIPR1/BGN/TGFB1/LAMC1/TGFBI/VEGFA/COL1A2/CDH11/COL3A1/SNAI2/COL4A1/NT5E/SERPINE2/SPOCK1/SNTB1/ITGB5/COL5A3/IGFBP4/GADD45B/SDC4/SPARC/COL12A1/ITGAV/MSX1/NID2/FAS/MMP14/CD…
APICAL_JUNCTION	APICAL_JUNCTION	162	-0.394214	-2.08647	1.06448e-08	2.80126e-08	7.6666e-09	4106	tags=62%, list=30%, signal=44%	ATP1A3/THY1/DHX16/VAV2/MAP4K2/KCNH2/CADM2/PIK3CB/TMEM8B/PTK2/CERCAM/ITGB1/CDH8/PBX2/RHOF/WASL/ACTN4/ITGA2/MPZL2/MYL9/EXOC4/PLCG1/CLDN5/TIAL1/ADAM9/CD209/MAPK14/FBN1/TSPAN4/CNN2/VWF/TRO/CD86/TGFBI/CDH11/CTNNA1/SHC1/RASA1/RRAS/CRAT/THBS3/MADCAM1/PARVA/IRS1/INPPL1/TJP1/EGFR/YWHAH/NLGN2/CAP1/MMP9/ITGA9/SGCE/PECAM1/CDH1/CX3CL1/STX4/RAC2/CD34/LDLRAP1/AMIGO1/ITGA10/NEGR1/SLIT2/NEXN/ITGB4/NF1/VCL/B4GALT1…
IL6_JAK_STAT3_SIGNALING	IL6_JAK_STAT3_SIGNALING	78	-0.50103	-2.35756	3.63244e-08	9.08111e-08	2.48536e-08	4647	tags=67%, list=34%, signal=44%	LTBR/CCR1/CXCL10/IL1R2/CNTFR/STAT1/SOCS1/SOCS3/IL1B/CXCL9/IL12RB1/TGFB1/CD38/ACVRL1/IL1R1/IL10RB/IL15RA/CD14/FAS/ACVR1B/TYK2/IRF9/TNFRSF1A/TNF/CSF2RB/CSF1/IL4R/OSMR/MAP3K8/JUN/LTB/IL2RG/TLR2/PDGFC/ITGA4/IFNAR1/LEPR/IL18R1/IRF1/IL7/IFNGR1/CSF2RA/TNFRSF1B/CD44/IL6ST/PIK3R5/STAM2/CD9/STAT3/A2M/IL13RA1/STAT2
INTERFERON_ALPHA_RESPONSE	INTERFERON_ALPHA_RESPONSE	89	-0.473637	-2.28184	1.57043e-07	3.73913e-07	1.02334e-07	4717	tags=69%, list=34%, signal=45%	OASL/CD47/IFI35/IFI44L/CXCL10/TRIM21/HELZ2/IFIT3/IRF7/PLSCR1/IFITM3/PARP9/IFITM1/BST2/SLC25A28/RTP4/CCRL2/IFI44/IFITM2/SELL/TRIM5/CNP/IRF2/LAMP3/PSMB9/NMI/NUB1/PSMB8/ADAR/IL15/SP110/IRF9/GMPR/TAP1/CASP8/CSF1/IL4R/MOV10/TRIM26/B2M/DDX60/IFIH1/IRF1/SAMD9L/PARP12/IL7/CASP1/GBP2/PARP14/HLA-C/IFIT2/TXNIP/GBP4/TDRD7/C1S/CD74/ELF1/LPAR6/SAMD9/STAT2/NCOA7
IL2_STAT5_SIGNALING	IL2_STAT5_SIGNALING	181	-0.367999	-1.97352	3.0452e-07	6.92091e-07	1.89414e-07	4493	tags=61%, list=33%, signal=41%	CXCL10/HIPK2/CDKN1C/FLT3LG/IRF4/IL1R2/PHLDA1/IGF2R/PLSCR1/ARL4A/IFITM3/SYNGR2/SOCS1/TNFRSF18/SWAP70/SH3BGRL2/ABCB1/MUC1/GALM/CST7/F2RL2/AMACR/IL10/MXD1/CAPG/CD86/BCL2/SLC2A3/SELP/SELL/ITIH5/NT5E/DHRS3/CA2/CDC42SE2/TWSG1/GADD45B/IKZF4/ITGAV/EOMES/NCOA3/CTSZ/BATF3/IGF1R/RHOH/CD83/ICOS/MAP6/GPR65/ANXA4/TNFRSF9/MYO1E/ADAM19/TLR7/ENPP1/AGER/MYC/CSF1/BMPR2/IL4R/MAP3K8/LTB/RGS16/EMP1/BHLHE40/WLS/CD48/SY…
APOPTOSIS	APOPTOSIS	146	-0.34867	-1.82686	2.32082e-05	5.04526e-05	1.38081e-05	3629	tags=48%, list=26%, signal=36%	LUM/DCN/DDIT3/BGN/GNA15/CD38/ADD1/HSPB1/MCL1/TIMP2/NEDD9/CASP7/CAV1/IER3/GADD45B/SOD2/BCL2L11/APP/LGALS3/CD14/FAS/ERBB2/DNM1L/ATF3/DNAJC3/TAP1/GPX3/RNASEL/PPT1/TNF/CASP8/PDGFRB/SAT1/CASP9/JUN/RETSAT/EMP1/CYLD/CASP4/LMNA/BTG2/GADD45A/RHOB/CD69/IRF1/TNFSF10/TIMP3/GCH1/CD2/CASP1/IFNGR1/PLAT/LEF1/PPP2R5B/PEA15/SQSTM1/CD44/TXNIP/ERBB3/CLU/GSN/ANXA1/IL18/CCND2/MADD/BIRC3/TGFBR3/CFLAR/DPYD/SPTAN1
GLYCOLYSIS	GLYCOLYSIS	181	0.360588	1.70902	0.000231263	0.000481798	0.00013186	3205	tags=33%, list=23%, signal=26%	POLR3K/AURKA/KIF20A/CENPA/GOT2/PRPS1/PGK1/FKBP4/MDH2/CDK1/ENO1/MIF/SAP30/PSMC4/LDHA/NSDHL/HAX1/HK2/TALDO1/TPI1/HMMR/NDUFV3/PKM/GNPDA1/CLN6/TXN/PGLS/SRD5A3/PPIA/SLC25A10/PMM2/DEPDC1/COPB2/G6PD/SDHC/NANP/SLC37A4/GYS1/NASP/MPI/AKR1A1/FAM162A/BPNT1/B4GALT4/SOD1/PC/ALDOA/SDC1/ALDH7A1/EXT2/HSPA5/HDLBP/ECD/PGAM1/ALG1/B4GALT7/ME2/B3GAT3/RPE/MDH1
BILE_ACID_METABOLISM	BILE_ACID_METABOLISM	87	-0.344734	-1.65958	0.000968748	0.0019375	0.000530262	2917	tags=38%, list=21%, signal=30%	AR/NR3C2/ALDH9A1/DIO2/CYP7B1/EFHC1/PIPOX/EPHX2/LCK/ACSL5/NPC1/SCP2/ABCA2/RETSAT/ABCA8/PEX1/ABCA1/CYP46A1/ALDH1A1/PNPLA8/NEDD4/GSTK1/SLC29A1/SLC23A2/ABCG4/ABCA9/CROT/ALDH8A1/ABCA6/BCAR3/ABCA5/OPTN/ATXN1
ANGIOGENESIS	ANGIOGENESIS	31	-0.474129	-1.8084	0.00333922	0.00642158	0.00175748	4980	tags=68%, list=36%, signal=43%	VAV2/PTK2/OLR1/COL5A2/FSTL1/JAG2/LUM/VEGFA/COL3A1/S100A4/PDGFA/LPL/APP/ITGAV/MSX1/SLCO2A1/SERPINA5/THBD/CCND2/NRP1/JAG1
REACTIVE_OXYGEN_SPECIES_PATHWAY	REACTIVE_OXYGEN_SPECIES_PATHWAY	46	0.450091	1.70255	0.00480939	0.00856359	0.00234372	2786	tags=39%, list=20%, signal=31%	PRDX4/PRDX6/PRDX2/TXN/NDUFB4/ABCC1/G6PD/OXSR1/GSR/NDUFA6/ERCC2/SCAF4/SOD1/GPX4/NDUFS2/ATOX1/LAMTOR5/GLRX2
APICAL_SURFACE	APICAL_SURFACE	36	-0.440456	-1.74225	0.00493211	0.00856359	0.00234372	5340	tags=75%, list=39%, signal=46%	GAS1/SHROOM2/THY1/ADAM10/LYN/PCSK9/TMEM8B/SRPX/GHRL/RTN4RL1/EPHB4/HSPB1/APP/NCOA6/CX3CL1/B4GALT1/ATP8B1/IL2RG/MAL/CD160/PKHD1/FLOT2/IL2RB/CROCC/AKAP7/AFAP1L2/MDGA1
SPERMATOGENESIS	SPERMATOGENESIS	97	0.364623	1.58414	0.00496688	0.00856359	0.00234372	938	tags=18%, list=7%, signal=16%	RFC4/AURKA/PSMG1/CDKN3/CCNB2/CDK1/BUB1/NCAPH/RPL39L/STRBP/TOPBP1/TALDO1/NEK2/KIF2C/TTK/DBF4/CSNK2A2
HEDGEHOG_SIGNALING	HEDGEHOG_SIGNALING	34	-0.423432	-1.62406	0.00733524	0.0122254	0.0033459	3311	tags=65%, list=24%, signal=49%	NRP2/CELSR1/RTN1/THY1/TLE1/CDK5R1/PML/CNTFR/VEGFA/HEY2/RASA1/HEY1/DPYSL2/ETS2/L1CAM/NF1/MYH9/ACHE/OPHN1/NRP1/SCG2/NRCAM
HEME_METABOLISM	HEME_METABOLISM	177	-0.246825	-1.32118	0.024982	0.0402936	0.0110277	3345	tags=31%, list=24%, signal=24%	ACP5/IGSF3/ADD1/SLC11A2/MAP2K3/FOXO3/CA2/LMO2/LRP10/LPIN2/NFE2L1/ARHGEF12/BCAM/ATG4A/SELENBP1/FECH/SDCBP/ERMAP/ANK1/SLC30A1/C3/FTCD/BTRC/BTG2/P4HA2/CCDC28A/SYNJ1/ENDOD1/SIDT2/CAST/MKRN1/RBM5/ALAD/RANBP10/RIOK3/PPP2R5B/NEK7/CLIC2/TRAK2/TNS1/RNF19A/TNRC6B/ABCG2/SPTB/ELL2/KAT2B/ATP6V0A1/ACSL6/FOXJ2/SLC22A4/AGPAT4/FBXO9/OPTN/NR3C1/EZH1
P53_PATHWAY	P53_PATHWAY	173	-0.241061	-1.28719	0.0307006	0.0479697	0.0131285	3543	tags=40%, list=26%, signal=30%	DDIT3/MXD1/RHBDF2/GM2A/PLK2/TGFB1/PRMT2/TSC22D1/CDKN2B/RXRA/VWA5A/PPP1R15A/S100A4/RALGDS/PTPN14/FOXO3/PDGFA/VAMP8/S100A10/IER3/ABCC5/APP/STEAP3/FAS/STOM/ATF3/ACVR1B/TM4SF1/CEBPA/BLCAP/DRAM1/TAP1/HEXIM1/ITGB4/TP63/SAT1/JUN/EPHA2/KLF4/NOTCH1/RETSAT/RGS16/ISCU/PTPRE/FOS/BTG2/GADD45A/ABHD4/SESN1/POM121/HBEGF/CASP1/RNF19B/TXNIP/CSRNP2/ERCC5/ZNF365/FUCA1/ANKRA2/SLC35D1/DGKA/NDRG1/DEF6/CCND2/KIF13B/ZFP3…
ADIPOGENESIS	ADIPOGENESIS	177	0.289112	1.36643	0.0316821	0.0480032	0.0131377	2617	tags=28%, list=19%, signal=23%	JAGN1/TKT/SLC1A5/NDUFAB1/MRPL15/MDH2/COX8A/GRPEL1/MTCH2/CYC1/ELOVL6/COX7B/SAMM50/UQCRC1/TALDO1/UQCRQ/COQ3/COQ9/CS/BCKDHA/NDUFB7/SLC5A6/NDUFS3/HADH/DHCR7/MCCC1/SLC25A10/CMBL/ESRRA/AIFM1/UQCR11/SDHC/ACAA2/PRDX3/COX6A1/UQCR10/SUCLG1/PPP1R15B/IDH3G/SLC25A1/TST/G3BP2/GPHN/SOD1/ATP1B3/GPX4/BCL2L13/ALDOA/IMMT

## Sheet: Fig_S5b_HALLMARK_GSEA
ID	Description	setSize	enrichmentScore	NES	pvalue	p.adjust	qvalues	rank	leading_edge	core_enrichment
MYC_TARGETS_V1	MYC_TARGETS_V1	186	0.717931	3.42945	8.84044e-47	4.42022e-45	1.67503e-45	3061	tags=80%, list=22%, signal=63%	RUVBL2/TRIM28/NHP2/TUFM/SNRPA/PSMC4/FBL/RPS5/MRPL23/SNRPD2/RRP9/PHB2/PSMD8/LSM7/IMPDH2/HDGF/POLD2/RPL18/LSM2/MCM5/MCM2/NME1/NOP16/APEX1/SRM/GOT2/PPM1G/PA2G4/COX5A/CYC1/POLE3/AIMP2/CCT7/RNPS1/PRDX4/RANBP1/RPS3/HNRNPD/CDC20/NDUFAB1/ERH/SF3B3/EIF3B/SET/CDK4/SNRPD1/HNRNPC/TYMS/CDC45/CLNS1A/SNRPG/RFC4/ODC1/RPLP0/PCBP1/EXOSC7/MAD2L1/SSBP1/CSTF2/CDK2/MCM4/PCNA/MCM6/CCT3/PSMA7/PHB/MRPL9/PSMB3/PGK1/MCM7/C…
E2F_TARGETS	E2F_TARGETS	188	0.707438	3.38615	3.81464e-45	9.5366e-44	3.61387e-44	2301	tags=66%, list=17%, signal=56%	DCTPP1/UBE2S/RNASEH2A/SNRPB/HMGA1/DDX39A/POLD1/POLD2/TRIP13/MCM5/UNG/CKS2/MCM2/NME1/KIF22/POP7/HMGB3/PA2G4/SSRP1/SUV39H1/PAICS/POLA2/TP53/PRDX4/RANBP1/SPC24/CHEK2/MYBL2/HNRNPD/CDC20/LIG1/PLK1/CENPM/PTTG1/KIF4A/TACC3/PRIM2/CCNE1/ASF1B/DSCC1/BIRC5/CDK4/AURKA/MCM3/AURKB/SPC25/UBE2T/TK1/CCNB2/CHEK1/CDKN3/CDC25A/CDCA3/MAD2L1/MCM4/PCNA/MCM6/PHF5A/RFC2/TIPIN/BUB1B/MTHFD2/PRPS1/MCM7/CKS1B/DLGAP5/RFC3/NCA…
G2M_CHECKPOINT	G2M_CHECKPOINT	181	0.624905	2.97972	9.07293e-28	1.51216e-26	5.73027e-27	3110	tags=62%, list=23%, signal=49%	UBE2S/HMGA1/DDX39A/PRMT5/MCM5/CKS2/MCM2/KIF22/HMGB3/CHAF1A/UBE2C/SUV39H1/POLA2/PTTG3P/MYBL2/E2F1/GINS2/HNRNPD/CDC20/DTYMK/PLK1/PTTG1/KIF4A/TACC3/PRIM2/TPX2/BIRC5/CDK4/SNRPD1/AURKA/MCM3/AURKB/CDC45/CCNB2/CHEK1/EXO1/SAP30/ODC1/CDKN3/CDC25A/MAD2L1/E2F3/CENPA/MCM6/CCNF/RBM14/CKS1B/CCNA2/CENPF/CDK1/ILF3/SMARCC1/GSPT1/CDC6/LMNB1/NUSAP1/KIF2C/CENPE/BUB1/KIF11/FBXO5/KIF15/KIF23/ESPL1/TRA2B/RAD54L/MKI67/P…
OXIDATIVE_PHOSPHORYLATION	OXIDATIVE_PHOSPHORYLATION	181	0.577805	2.75513	2.61652e-21	3.27065e-20	1.2394e-20	2943	tags=57%, list=21%, signal=46%	TOMM22/COX6B1/TIMM13/TIMM50/MRPS12/PHB2/BCKDHA/MDH2/MRPL11/IDH2/HSD17B10/SLC25A6/GOT2/NDUFB7/COX5A/CYC1/NDUFA3/COX8A/POLR2F/UQCRFS1/NDUFA7/NDUFS7/NDUFS6/TIMM9/BAX/NDUFAB1/OXA1L/MRPL34/TIMM10/PMPCA/SLC25A5/UQCRC1/NDUFA2/ECI1/UQCRQ/COX5B/MRPS11/NDUFV1/GRPEL1/GPX4/UQCR11/PDHA1/COX7C/LDHB/COX7B/NDUFS3/NDUFA1/SURF1/MRPL15/NDUFB1/LDHA/CS/NDUFA8/COX4I1/SLC25A3/GPI/MRPS30/HADHA/NDUFB6/IDH3G/TIMM8B/COX7A2…
INTERFERON_GAMMA_RESPONSE	INTERFERON_GAMMA_RESPONSE	187	-0.522091	-2.79207	2.16202e-20	2.16202e-19	8.19293e-20	4061	tags=63%, list=30%, signal=45%	ARL4A/GPR18/OAS3/BST2/ITGB7/BANK1/CASP3/EPSTI1/PTPN6/IRF5/IL15RA/OAS2/SELP/CD40/CD86/ZNFX1/AUTS2/ST8SIA4/TRIM26/STAT1/PSMB8/IFIT1/NFKBIA/HLA-G/PSMB9/HLA-DQA1/RTP4/IFI44L/VAMP8/IDO1/CXCL9/HLA-A/IRF9/CXCL10/IFIT3/NFKB1/IL18BP/CD38/TAP1/IL4R/C1R/RSAD2/LYSMD2/IL15/IRF2/PLSCR1/CASP8/IFI44/CSF2RB/ICAM1/GZMA/CCL5/PTGS2/CMKLR1/SAMHD1/IRF1/PELI1/IL2RB/SPPL2A/SP110/NCOA3/CASP7/NOD1/NMI/PARP12/IL7/HLA-DMA/S…
MYC_TARGETS_V2	MYC_TARGETS_V2	55	0.780838	3.0823	2.72669e-19	2.27224e-18	8.61061e-19	2233	tags=85%, list=16%, signal=72%	EXOSC5/FARSA/IPO4/DCTPP1/BYSL/WDR74/PES1/RRP9/GRWD1/MCM5/UNG/NOP16/SRM/IMP4/PA2G4/TMEM97/AIMP2/PLK1/NIP7/CDK4/MCM4/PPRC1/PHB/RRP12/RCL1/TBRG4/NPM1/NOC4L/RABEPK/HK2/TCOF1/HSPD1/SLC29A2/WDR43/MRTO4/HSPE1/SORD/NOP2/NOLC1/MYBBP1A/TFB2M/PRMT3/PLK4/GNL3/PUS1/NDUFAF4/DDX18
TNFA_SIGNALING_VIA_NFKB	TNFA_SIGNALING_VIA_NFKB	184	-0.507042	-2.69858	5.37476e-18	3.83911e-17	1.45482e-17	4722	tags=67%, list=34%, signal=44%	IRS2/JUNB/MAP2K3/NFIL3/SLC2A6/CEBPD/SOCS3/CD80/RELB/INHBA/SNN/DUSP5/CXCL11/FOSB/PLK2/EGR1/IER3/LITAF/TUBB2A/JUN/IL1A/IL15RA/MSC/GFPT2/TSC22D1/F2RL1/NR4A3/VEGFA/IL1B/CSF1/CCNL1/PMEPA1/GADD45B/HES1/RHOB/NFKBIA/RCAN1/STAT5A/TIPARP/MARCKS/KYNU/KLF10/NFKB2/SLC2A3/OLR1/NR4A1/ETS2/TNF/GADD45A/PDLIM5/TNFRSF9/CD83/CCRL2/CXCL10/TNFAIP8/CXCL2/NFKB1/EGR2/MYC/MXD1/TAP1/KLF2/B4GALT1/NR4A2/ICAM1/PLAU/DUSP1/CCL5…
DNA_REPAIR	DNA_REPAIR	134	0.585608	2.69512	4.66551e-17	2.91594e-16	1.10499e-16	1797	tags=46%, list=13%, signal=41%	NME4/POLR2I/POLR2H/GTF2F1/FEN1/IMPDH2/POLD1/SAC3D1/ALYREF/NME1/SSRP1/TAF10/ERCC1/POLA2/TP53/POLR2F/POLR2E/LIG1/POLR2C/APRT/SEC61A1/MPG/ADRM1/RAD51/TYMS/DGUOK/POLR2D/RFC4/ERCC2/PCNA/RFC2/BCAP31/EDF1/POLA1/DAD1/GPX4/SUPT4H1/AAAS/SURF1/RFC3/BOLA2/DUT/RAE1/POLR1D/CLP1/POLE4/UMPS/ITPA/NCBP2/BRF2/MRPL40/GTF2A2/ZWINT/POLR1C/POLR2G/PRIM1/POLR2J/VPS37B/NT5C/DDB1/RPA3/DDB2
INFLAMMATORY_RESPONSE	INFLAMMATORY_RESPONSE	167	-0.505045	-2.64013	4.61475e-16	2.56375e-15	9.71527e-16	3751	tags=57%, list=27%, signal=42%	IL15RA/MSR1/CX3CL1/SLC4A4/CD40/SLAMF1/ATP2A2/ITGB3/LAMP3/IL1B/CSF1/CXCR6/NFKBIA/GP1BA/IL10/MMP14/LCK/CD14/SELE/OLR1/LPAR1/RTP4/TNFRSF9/APLNR/CCRL2/CXCL9/TNFSF15/CXCL10/NFKB1/CCR7/MYC/SELL/MXD1/HRH1/PCDH7/IL4R/SGMS2/SLC31A1/IL15/IL1R1/NLRP3/TLR3/OSMR/ICAM1/SCARF1/CCL5/C3AR1/RGS16/BTG2/CMKLR1/IRF1/HBEGF/IL2RB/SEMA4D/PTPRE/F3/NMI/NOD2/TNFRSF1B/SLC11A2/GCH1/ACVR2A/IL18RAP/SLC31A2/AXL/RASGRP1/TLR1/CCL…
KRAS_SIGNALING_UP	KRAS_SIGNALING_UP	172	-0.460654	-2.41585	2.17727e-12	1.08863e-11	4.12535e-12	3749	tags=49%, list=27%, signal=36%	PEG3/ADAM8/GFPT2/ALDH1A3/ABCB1/F2RL1/VWA5A/SATB1/JUP/IL1B/CD37/ITGA2/PSMB8/MMP9/NAP1L2/ITGBL1/ACE/TMEM176A/APOD/MMD/LY96/CXCL10/ANKH/DUSP6/PECAM1/SNAP91/TFPI/CA2/LAPTM5/IL2RG/PLAU/KLF4/TRAF1/PTGS2/C3AR1/RGS16/CMKLR1/HBEGF/MTMR10/PLAT/SNAP25/TNFRSF1B/TMEM176B/TLR8/EMP1/CFH/CPE/SPARCL1/PRDM1/ITGB2/BTBD3/LAT2/PTBP2/CSF2RA/DOCK2/MAFB/NIN/ANO1/CCND2/KIF5C/IL7R/IL33/IL10RA/CAB39L/EPB41L3/IKZF1/ADAMDEC1…
MTORC1_SIGNALING	MTORC1_SIGNALING	188	0.473893	2.26828	1.25586e-11	5.70845e-11	2.1632e-11	2834	tags=43%, list=21%, signal=34%	TOMM40/PSMC4/DDX39A/RRP9/PSMB5/UNG/MCM2/SLC1A5/ENO1/GAPDH/TMEM97/EBP/PHGDH/PLK1/GMPS/TPI1/PSMD13/AURKA/PSMG1/CDC25A/DHFR/MCM4/ELOVL6/SHMT2/STIP1/CCNF/PSAT1/DHCR7/G6PD/MTHFD2/PGK1/RRM2/LDHA/HMBS/GPI/BUB1/HK2/ABCF2/HSPD1/TM7SF2/PPIA/TRIB3/ALDOA/SLC37A4/RPN1/CALR/FADS2/HSPE1/SLC7A5/SORD/SLC2A1/SDF2L1/SCD/ARPC5L/PPA1/PSME3/EEF1E1/SQLE/GSR/PDK1/PSMA3/CACYBP/UBE2D3/EIF2S2/TUBG1/PSMA4/PDAP1/PNO1/HPRT1/G…
UV_RESPONSE_DN	UV_RESPONSE_DN	136	-0.482699	-2.46259	1.46241e-11	6.09337e-11	2.30907e-11	4327	tags=59%, list=32%, signal=41%	ZMIZ1/EFEMP1/MAP1B/GCNT1/FHL2/CDKN1B/PRKCA/PTEN/IRS1/RXRA/SCAF8/RUNX1/AKT3/COL5A2/PIAS3/DYRK1A/COL1A2/GJA1/ITGB3/RND3/PRKAR2B/MGLL/LAMC1/CDON/COL3A1/IGFBP5/LPAR1/CAP2/PDLIM5/SNAI2/ARHGEF9/NFKB1/SCN8A/MYC/TFPI/PDGFRB/ADD3/DUSP1/PHF3/IGF1R/FYN/ANXA4/BHLHE40/SDC2/CAV1/F3/AMPH/TJP1/RASA2/ATRN/ACVR2A/FBLN5/MAPK14/AGGF1/ANXA2/NOTCH2/DAB2/CDC42BPA/PRKCE/INPP4B/KCNMA1/MAGI2/SYNE1/TGFBR3/PIK3CD/PTPRM/DLC1…
COMPLEMENT	COMPLEMENT	174	-0.439677	-2.32181	2.8456e-11	1.09446e-10	4.14743e-11	4388	tags=58%, list=32%, signal=40%	COL4A2/SERPINA1/S100A13/L3MBTL4/WAS/DUSP5/APOBEC3F/TIMP2/LYN/CDH13/CASP5/PPP2CB/USP14/FCER1G/CTSB/CASP3/F5/ANXA5/NOTCH4/BRPF3/CD40LG/GNB4/FCN1/CD36/CSRP1/APOC1/CR1/CTSC/GP1BA/PSMB9/USP8/MMP14/KYNU/LCK/DPP4/KCNIP2/OLR1/LGALS3/CASP9/LRP1/DUSP6/PDGFB/C1R/GCA/CA2/IRF2/PLSCR1/GZMA/C3/CCL5/PRCP/FYN/GZMK/ERAP2/IRF1/VCPIP1/ITGAM/F3/CASP7/PLAT/PRKCD/LAMP2/LIPA/CASP4/CLU/CFH/CD59/RASGRP1/APOBEC3G/CPM/CPQ/A…
ALLOGRAFT_REJECTION	ALLOGRAFT_REJECTION	172	-0.422361	-2.21503	7.92406e-10	2.83002e-09	1.07243e-09	3826	tags=58%, list=28%, signal=42%	PTPN6/KLRD1/BCL10/CD3E/HLA-DOB/CD40/CD86/CD40LG/IL1B/ST8SIA4/GLMN/STAT1/CSF1/CD3D/CD247/HLA-G/MMP9/CCR1/CD47/EGFR/SPI1/IL10/LCK/CRTAM/LY86/HLA-DQA1/FGR/ELF4/NCF4/LTB/TNF/CD28/CD3G/CXCL9/CCR2/HLA-A/TAP1/TRAT1/IL4R/NCK1/IL15/ZAP70/NLRP3/TLR3/ICAM1/CD1D/GZMA/IL2RG/CCL5/ACHE/CCL4/IL16/CCL19/SRGN/ITGAL/IL2RB/IL27RA/IL7/HLA-DOA/HLA-DMA/CD4/CD8A/TLR6/ACVR2A/HLA-E/CD96/IL18RAP/CCR5/CD2/TLR1/ITGB2/CCL2/IG…
INTERFERON_ALPHA_RESPONSE	INTERFERON_ALPHA_RESPONSE	89	-0.499118	-2.33666	1.00168e-08	3.33893e-08	1.26528e-08	4760	tags=72%, list=35%, signal=47%	IFITM2/OASL/TRIM25/CNP/HERC6/IRF7/USP18/OAS1/IFITM1/TRIM21/CXCL11/TRIM5/BST2/EPSTI1/LAMP3/TRIM26/CSF1/PSMB8/PSMB9/CD47/MOV10/RTP4/IFI44L/GMPR/CCRL2/IRF9/CXCL10/IFIT3/SELL/TAP1/IL4R/RSAD2/PARP9/IL15/IRF2/PLSCR1/CASP8/IFI44/NUB1/IRF1/SP110/NMI/PARP12/IL7/HLA-C/CD74/ADAR/B2M/GBP2/TXNIP/C1S/STAT2/IFIT2/IFIH1/GBP4/PARP14/DDX60/CASP1/TDRD7/SAMD9L/LPAR6/ELF1/NCOA7/SAMD9
UNFOLDED_PROTEIN_RESPONSE	UNFOLDED_PROTEIN_RESPONSE	102	0.489687	2.16303	9.43487e-08	2.9484e-07	1.11729e-07	2951	tags=47%, list=22%, signal=37%	EXOSC5/NHP2/EIF4EBP1/LSM4/RRP9/EXOSC4/BANF1/EEF2/ALDH18A1/IMP3/YIF1A/EIF4G1/RPS14/NOP14/SRPRB/PSAT1/MTHFD2/SPCS1/CKS1B/EXOSC2/NPM1/EXOSC9/FUS/GEMIN4/EXOSC1/KHSRP/POP4/CALR/SLC7A5/NOLC1/DDX10/EIF2S1/PDIA6/CEBPG/LSM1/EDC4/NFYA/EIF4E/TATDN2/CXXC1/ASNS/SERP1/PAIP1/SDAD1/PREB/SPCS3/XPOT/HYOU1
IL6_JAK_STAT3_SIGNALING	IL6_JAK_STAT3_SIGNALING	78	-0.502342	-2.29415	1.82624e-07	5.37129e-07	2.03543e-07	3994	tags=59%, list=29%, signal=42%	JUN/ACVRL1/IL15RA/TNFRSF1A/ITGB3/IL1B/STAT1/CSF1/CD36/CCR1/CD14/LTB/TNF/IL10RB/PTPN11/CXCL9/IRF9/CXCL10/CD38/IL4R/IL1R1/OSMR/CSF2RB/IL2RG/IRF1/TNFRSF1B/IL7/PDGFC/CD44/IL18R1/LEPR/CSF2RA/CD9/TLR2/FAS/PIK3R5/STAT2/MAP3K8/STAT3/IFNAR1/IFNGR1/A2M/ITGA4/IL13RA1/IL6ST/STAM2
EPITHELIAL_MESENCHYMAL_TRANSITION	EPITHELIAL_MESENCHYMAL_TRANSITION	190	-0.357968	-1.91888	5.14853e-07	1.37357e-06	5.20512e-07	4395	tags=48%, list=32%, signal=33%	PRRX1/COL4A2/INHBA/IGFBP4/FSTL3/TNFRSF11B/HTRA1/VEGFC/CAPG/JUN/ITGB5/MATN3/SPOCK1/COL5A2/VEGFA/COL1A2/MGP/GJA1/THBS2/ITGB3/FSTL1/PMEPA1/ITGA2/GADD45B/RHOB/DCN/MMP14/COL4A1/FAP/SERPINE2/LAMC1/SPARC/SNTB1/FBN1/SLIT2/COL3A1/CAP2/GADD45A/SNAI2/IL32/ITGB1/NID2/TGFBI/LUM/LRP1/NTM/CDH11/BMP1/ABI3BP/IL15/GLIPR1/ECM1/PDGFRB/COL6A3/TIMP3/COL12A1/WIPF1/NT5E/COL16A1/CD44/TPM1/FBLN5/SFRP1/CD59/LAMA3/GEM/LAMA2…
IL2_STAT5_SIGNALING	IL2_STAT5_SIGNALING	181	-0.367353	-1.95241	5.3463e-07	1.37357e-06	5.20512e-07	3018	tags=44%, list=22%, signal=34%	ADAM19/SLC2A3/EOMES/LTB/BCL2/SH3BGRL2/TNFRSF9/COL6A1/CD83/MAP6/CXCL10/AGER/MYC/WLS/SELL/MXD1/ICOS/IL4R/RHOH/CA2/ECM1/PLSCR1/ENPP1/IGF1R/TRAF1/SERPINB6/RGS16/ANXA4/BHLHE40/IL2RB/NCOA3/NT5E/PLEC/TNFRSF1B/CD44/EMP1/SWAP70/MYO1E/CDC42SE2/GPR65/IL18R1/ITGAV/CD48/NDRG1/ALCAM/SYT11/PRKCH/CCND2/TLR7/IL10RA/ITGA6/TWSG1/LRRC8C/NFKBIZ/BMPR2/MYO1C/PLAGL1/TNFSF10/SHE/MAP3K8/IRF8/SNX14/KLF6/IFNGR1/GBP4/AHNAK/L…
COAGULATION	COAGULATION	109	-0.435753	-2.12502	5.4943e-07	1.37357e-06	5.20512e-07	3375	tags=45%, list=25%, signal=34%	CAPN2/KLF7/ITGA2/CSRP1/APOC1/MMP9/GP1BA/P2RY1/MST1/MMP14/DPP4/SPARC/FBN1/OLR1/CASP9/CFI/LRP1/DUSP6/BMP1/PECAM1/PDGFB/C1R/THBD/PLAU/C3/FYN/TIMP3/F3/PLAT/LAMP2/GSN/TF/CLU/CFH/GNG12/CPQ/ADAM9/CTSH/ISCU/KLKB1/MASP2/PLEK/CD9/C1S/CTSO/PROS1/ANXA1/A2M/CTSK
MYOGENESIS	MYOGENESIS	152	-0.365741	-1.88994	4.95285e-06	1.17925e-05	4.46874e-06	3805	tags=42%, list=28%, signal=31%	FXYD1/EPHB3/GNAO1/ITGB4/GPX3/GJA5/LSP1/CASQ2/HSPB8/CD36/GAA/CRYAB/GADD45B/DMD/AGRN/SPARC/NOTCH1/APP/COL3A1/NCAM1/APOD/MEF2A/APLNR/HDAC5/ITGB1/AGL/BDKRB2/PYGM/IGF1/WWTR1/PPFIA4/RB1/LPIN1/COL6A3/ACHE/BHLHE40/HBEGF/MYH9/KLF5/GSN/COL15A1/IGFBP7/SORBS1/CLU/LAMA2/ERBB3/PKIA/DAPK2/CAMK2B/SVIL/ITGA7/MYO1C/REEP1/MYLK/IFRD1/FABP3/FLII/MEF2C/SGCD/SSPN/SPTAN1/RIT1/PDE4DIP/SPEG
GLYCOLYSIS	GLYCOLYSIS	181	0.380702	1.81529	1.58133e-05	3.59393e-05	1.36191e-05	3064	tags=31%, list=22%, signal=24%	PSMC4/MDH2/PGLS/MIF/GOT2/ENO1/GYS1/FKBP4/SLC25A10/POLR3K/CLN6/TPI1/AURKA/KIF20A/SAP30/NSDHL/TALDO1/PMM2/CENPA/PKM/HAX1/NDUFV3/G6PD/PRPS1/PGK1/CDK1/LDHA/SRD5A3/HK2/GNPDA1/PPIA/ALDOA/SLC37A4/SDC1/TXN/B4GALT7/AKR1A1/PC/HMMR/MPI/B3GAT3/ALG1/DEPDC1/SDHC/HDLBP/GALK1/FAM162A/DPYSL4/SOD1/B4GALT2/NASP/EXT2/BPNT1/CLDN3/PGAM1/ALDH7A1
APOPTOSIS	APOPTOSIS	146	-0.341014	-1.75101	4.94628e-05	0.000107528	4.07473e-05	4171	tags=52%, list=30%, signal=37%	TIMP2/CDKN1B/IER3/ADD1/PTK2/JUN/IL1A/CASP3/BCL10/GPX3/SATB1/NEDD9/IL1B/LMNA/GADD45B/RHOB/DCN/CD14/APP/LGALS3/CASP9/TNF/RETSAT/GADD45A/PEA15/PPP2R5B/DDIT3/ANKH/XIAP/LUM/CD38/TAP1/PDGFRB/CASP8/TIMP3/BNIP3L/BTG2/BCL2L11/CAV1/ATF3/IRF1/SQSTM1/CASP7/PLAT/SOD2/GCH1/CD44/MCL1/GSN/DNM1L/EMP1/CASP4/CLU/CD2/MADD/ERBB3/CD69/LEF1/DNAJC3/PPT1/FAS/CCND2/SAT1/TXNIP/RNASEL/TNFSF10/TGFBR3/IFNGR1/IL18/ANXA1/CASP1/…
APICAL_JUNCTION	APICAL_JUNCTION	162	-0.326182	-1.69102	8.04855e-05	0.000167678	6.35412e-05	4261	tags=46%, list=31%, signal=32%	ITGA9/TNFRSF11B/TRO/SORBS3/THBS3/CDK8/PTEN/PTK2/IRS1/NRXN2/AKT3/TAOK2/CX3CL1/ITGB4/ITGA10/CD86/PARVA/JUP/MSN/CAP1/NEGR1/ITGA2/RAC2/MMP9/EGFR/FBN1/SLIT2/AMIGO1/CD34/LDLRAP1/WASL/CDH1/CTNNA1/ITGB1/YWHAH/TGFBI/CDH11/BMP1/PECAM1/B4GALT1/TIAL1/ICAM1/PKD1/TRAF1/PPP2R2C/CADM3/PIK3CB/MYH9/MAPK11/VCL/COL16A1/RASA1/TJP1/CNTN1/MAPK14/LAMA3/NEXN/ADAM9/SYK/EPB41L2/SIRPA/NF1/CD274/SGCE/TSC1/LIMA1/CDH6/AMIGO2/S…
PROTEIN_SECRETION	PROTEIN_SECRETION	93	-0.345956	-1.62965	0.00207149	0.00414299	0.00156997	2337	tags=31%, list=17%, signal=26%	GALC/ARFGEF2/ADAM10/SCRN1/SGMS1/RAB2A/CAV2/LAMP2/DNM1L/NAPG/GBF1/PAM/PPT1/ARFGEF1/MAPK1/ABCA1/ARFGAP3/CLN5/VAMP3/SSPN/STX7/KIF1B/DST/VAMP4/SNAP23/VPS4B/MON2/STX12/STX16
ANGIOGENESIS	ANGIOGENESIS	31	-0.499867	-1.85668	0.00251487	0.0048363	0.0018327	5302	tags=77%, list=39%, signal=48%	FGFR1/JAG2/VAV2/MSX1/POSTN/SPP1/S100A4/PTK2/COL5A2/VEGFA/SERPINA5/SLCO2A1/FSTL1/PDGFA/APP/COL3A1/OLR1/LPL/LUM/THBD/ITGAV/CCND2/JAG1/NRP1
BILE_ACID_METABOLISM	BILE_ACID_METABOLISM	87	-0.344254	-1.61268	0.00390789	0.00723684	0.00274238	3108	tags=38%, list=23%, signal=30%	NUDT12/LCK/CYP7B1/ALDH9A1/RETSAT/CAT/CYP46A1/GCLM/NR3C2/GSTK1/EPHX2/DIO2/NPC1/SLC29A1/ABCA8/ABCG4/ALDH8A1/ACSL5/ALDH1A1/ABCA1/SCP2/PEX1/SLC23A2/CROT/BCAR3/EFHC1/PNPLA8/ABCA9/NEDD4/ABCA6/ABCA5/OPTN/ATXN1
REACTIVE_OXYGEN_SPECIES_PATHWAY	REACTIVE_OXYGEN_SPECIES_PATHWAY	46	0.435065	1.64164	0.00621333	0.0110952	0.00420451	4263	tags=54%, list=31%, signal=38%	PRDX2/PRDX4/PRDX6/ERCC2/GPX4/G6PD/ABCC1/NDUFB4/TXN/ATOX1/NDUFS2/GSR/NDUFA6/SCAF4/SOD1/STK25/LAMTOR5/HMOX2/GLRX2/PFKP/TXNRD2/OXSR1/FES/FTL/SBNO2
APICAL_SURFACE	APICAL_SURFACE	36	-0.421467	-1.61576	0.00705658	0.0121665	0.00461047	5082	tags=61%, list=37%, signal=39%	RTN4RL1/EPHB4/SRPX/HSPB1/GHRL/LYN/CROCC/FLOT2/CX3CL1/NCOA6/APP/MAL/B4GALT1/IL2RG/CD160/ADAM10/IL2RB/PKHD1/AKAP7/ATP8B1/AFAP1L2/MDGA1
UV_RESPONSE_UP	UV_RESPONSE_UP	145	0.314871	1.46548	0.00788338	0.013139	0.00497897	3289	tags=35%, list=24%, signal=27%	POLR2H/MRPL23/AP2S1/FEN1/SIGMAR1/POLE3/WIZ/FKBP4/CCNE1/BSG/PPIF/BID/RFC4/PPAT/CDK2/STIP1/GRPEL1/PSMC3/IGFBP2/SLC6A8/ALDOA/CDC34/HYAL2/RPN1/EIF2S3/DDX21/KLHDC3/TST/GAL/CLCN2/CEBPG/HNRNPU/SPR/ATP6V1F/ALAS1/CLTB/GGH/PDAP1/RET/ASNS/E2F5/CYB5B/YKT6/DNAJB1/APOM/BTG3/EIF5/STK25/TGFBRAP1/TYRO3/PRKACA
HEME_METABOLISM	HEME_METABOLISM	177	-0.26925	-1.42111	0.00963164	0.0155349	0.00588691	2796	tags=29%, list=20%, signal=23%	PPP2R5B/KLF3/CAT/FTCD/PICALM/GCLM/ERMAP/CA2/YPEL5/ATG4A/C3/BNIP3L/DAAM1/BTG2/P4HA2/RANBP10/SLC11A2/LAMP2/MKRN1/SPTB/FECH/SLC30A1/LPIN2/ARHGEF12/ENDOD1/TNS1/ALAD/CAST/CCDC28A/SYNJ1/BTRC/ATP6V0A1/SDCBP/FOXJ2/ABCG2/TNRC6B/CLIC2/TRAK2/ELL2/RIOK3/RBM5/SLC22A4/RNF19A/ACSL6/FBXO9/NEK7/OPTN/AGPAT4/NR3C1/EZH1/KAT2B
